# Supplementary material for: Transcriptomic and metabolomic analyses identify a role for chlorophyll catabolism and phytoalexin during Medicago nonhost resistance against Asian soybean rust
Source: PubMed Central journal article supplement (PMC4533520; doi:10.1038/srep13061), 2015-08-12
Supplement: srep13061-s1.pdf [file srep13061-s1.pdf]

Manuscript title:

**Transcriptomic and metabolomic analyses identify a role for chlorophyll catabolism and phytoalexin during *Medicago* nonhost resistance against Asian soybean rust**

Authors' full names:

Yasuhiro Ishiga<sup>1</sup>, Srinivasa Rao Uppalapati<sup>1,2</sup>, Upinder S. Gill, David Huhman, Yuhong Tang and Kirankumar S. Mysore\*

Institution addresses:

Plant Biology Division, The Samuel Roberts Noble Foundation, Ardmore, OK 73401, USA (Y.I., S.U., U.G., D.H., Y.T., K.M.)

Faculty of Life and Environmental Sciences, University of Tsukuba, 1-1-1 Tennodai, Tsukuba, Ibaraki 305-8572, Japan (Y. I.)

<sup>1</sup>These authors contributed equally.

Running title:

Omics of *M. truncatula*-soybean rust interaction

For correspondence:

Kirankumar S. Mysore

Address:

Plant Biology Division, The Samuel Roberts Noble Foundation, Ardmore, OK 73401, USA

Email: [kmysore@noble.org](mailto:kmysore@noble.org)

Tel. (+1) 580-224-6740; Fax (+1) 580-224-6692

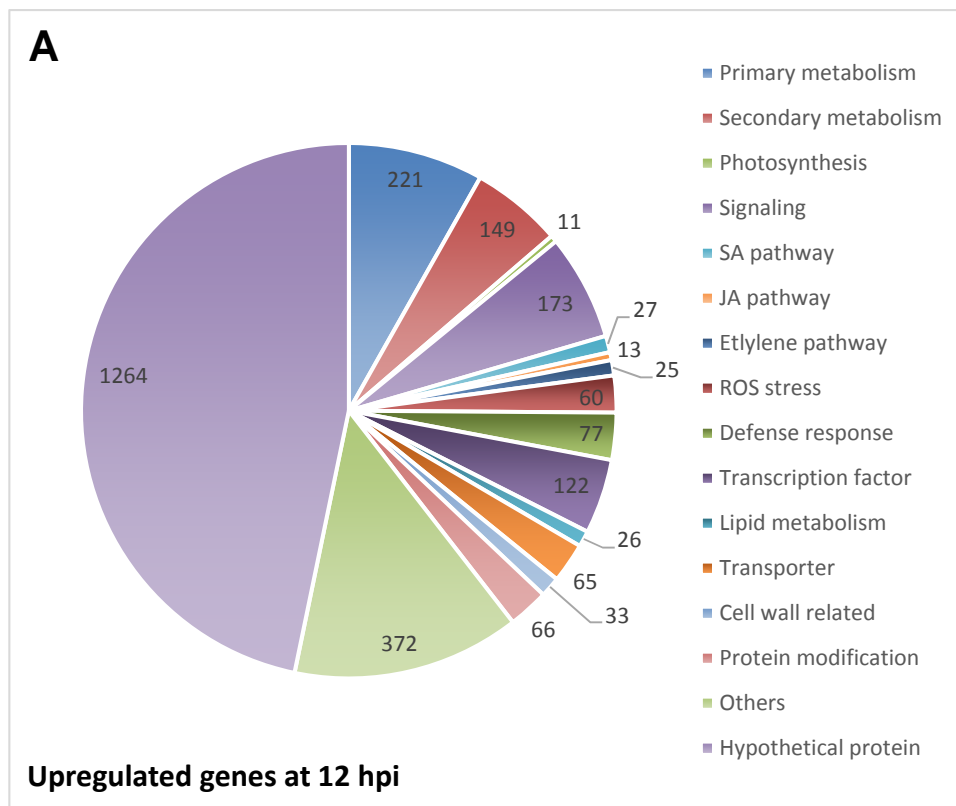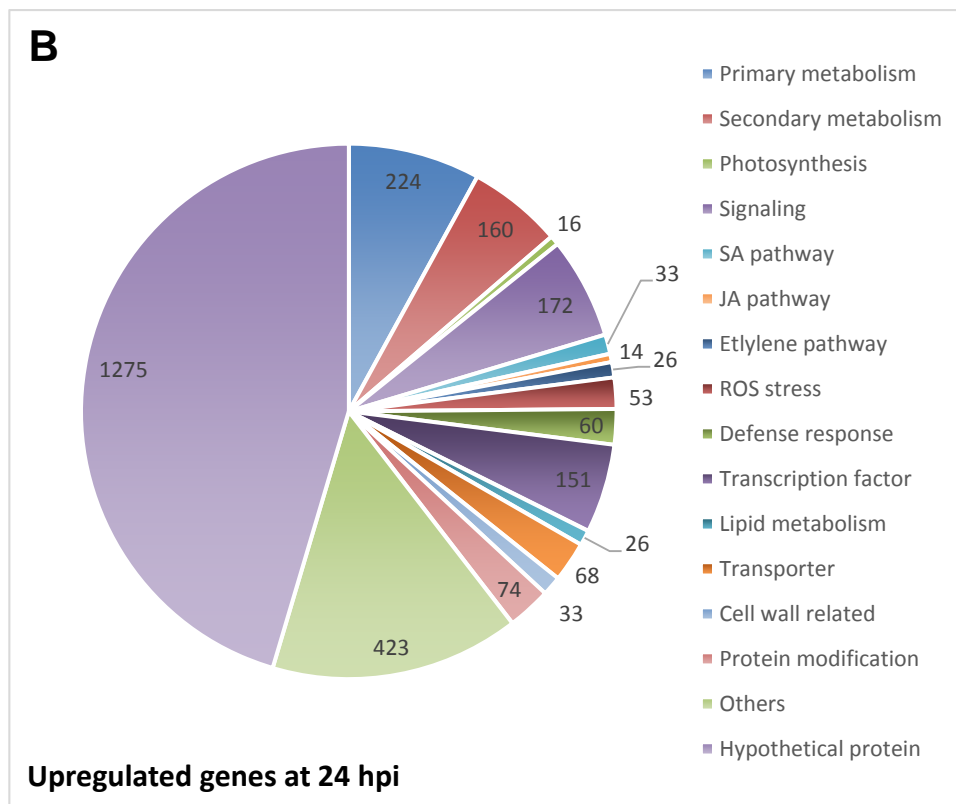

**Supplementary Figure S1.** Piecharts showing functional classification of upregulated genes during *M. truncatula*-*P. pachyrhizi* interactions at 12 (A) and 24 (B) hours postinoculation (hpi).

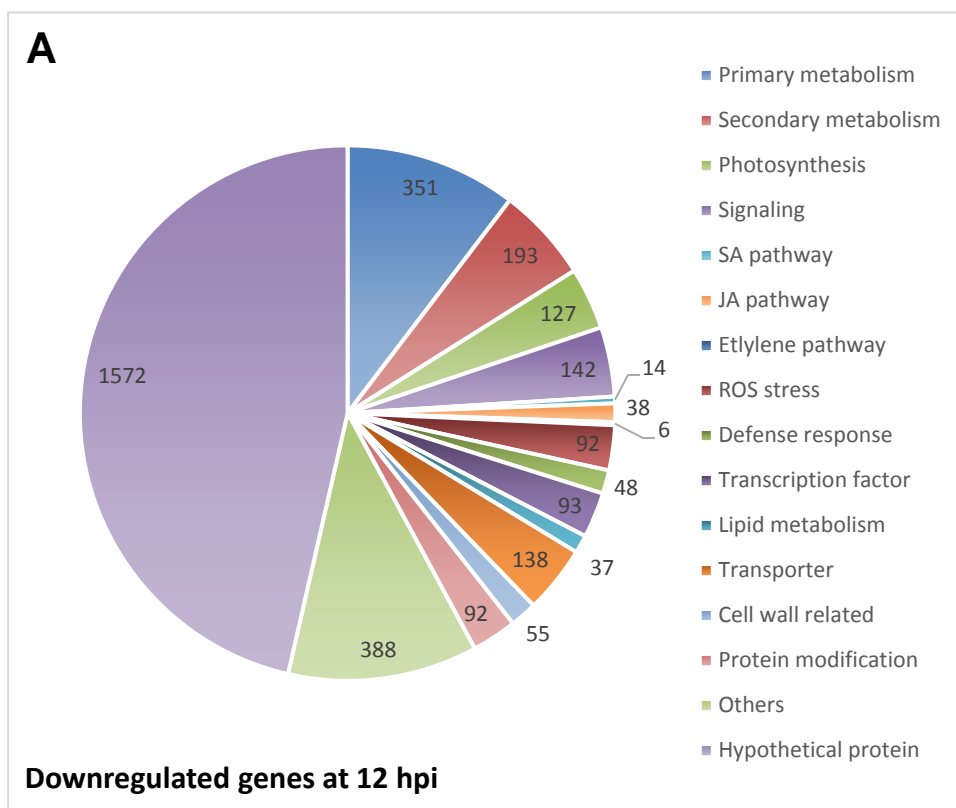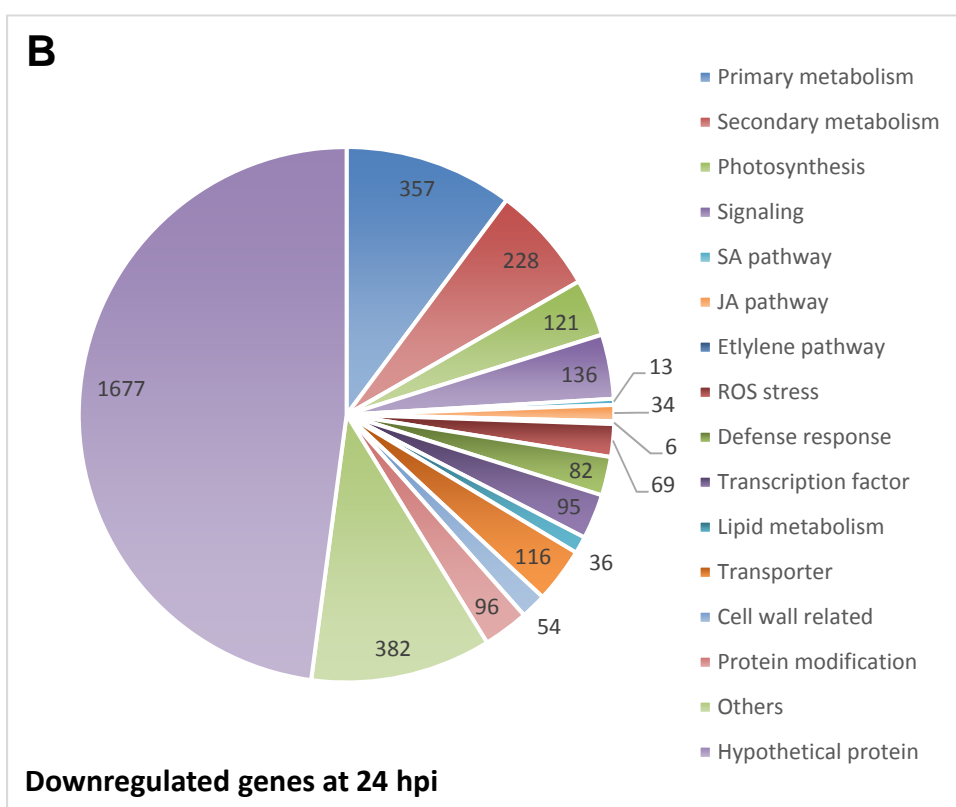

**Supplementary Figure S2.** Piecharts showing functional classification of downregulated genes during *M. truncatula*-*P. pachyrhizi* interactions at 12 (A) and 24 (B) hours postinoculation (hpi).

Fig. S3

A

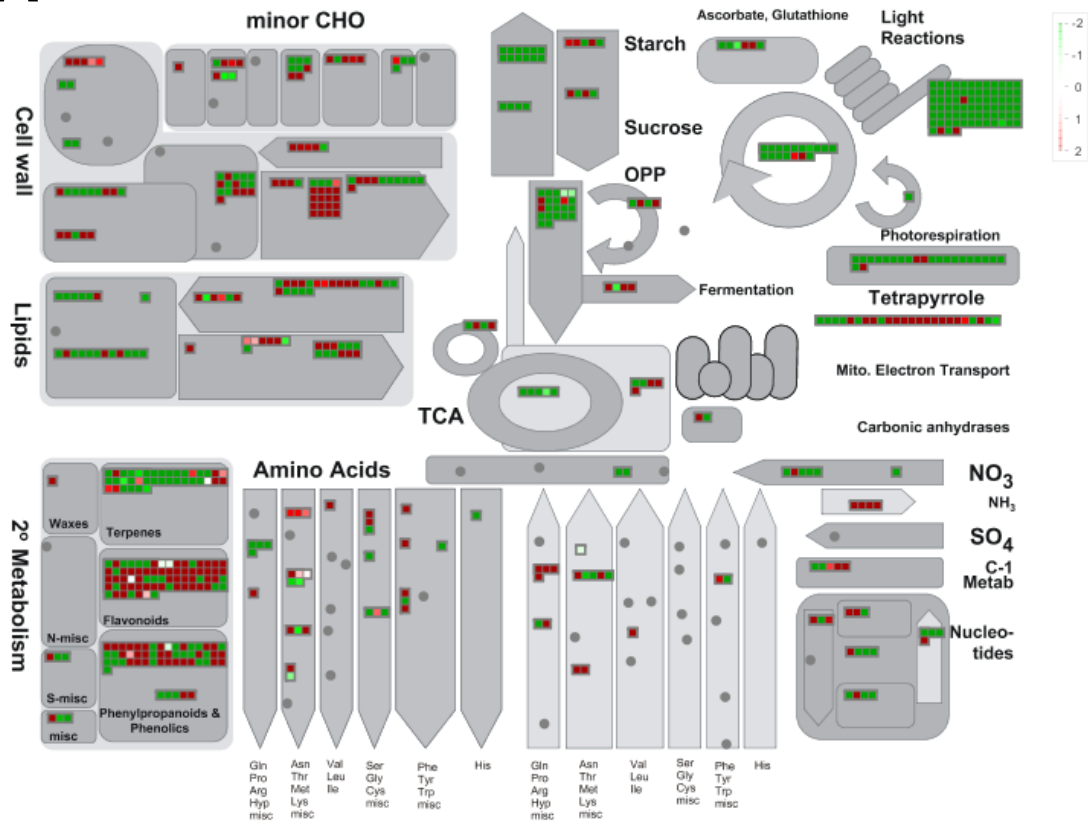

B

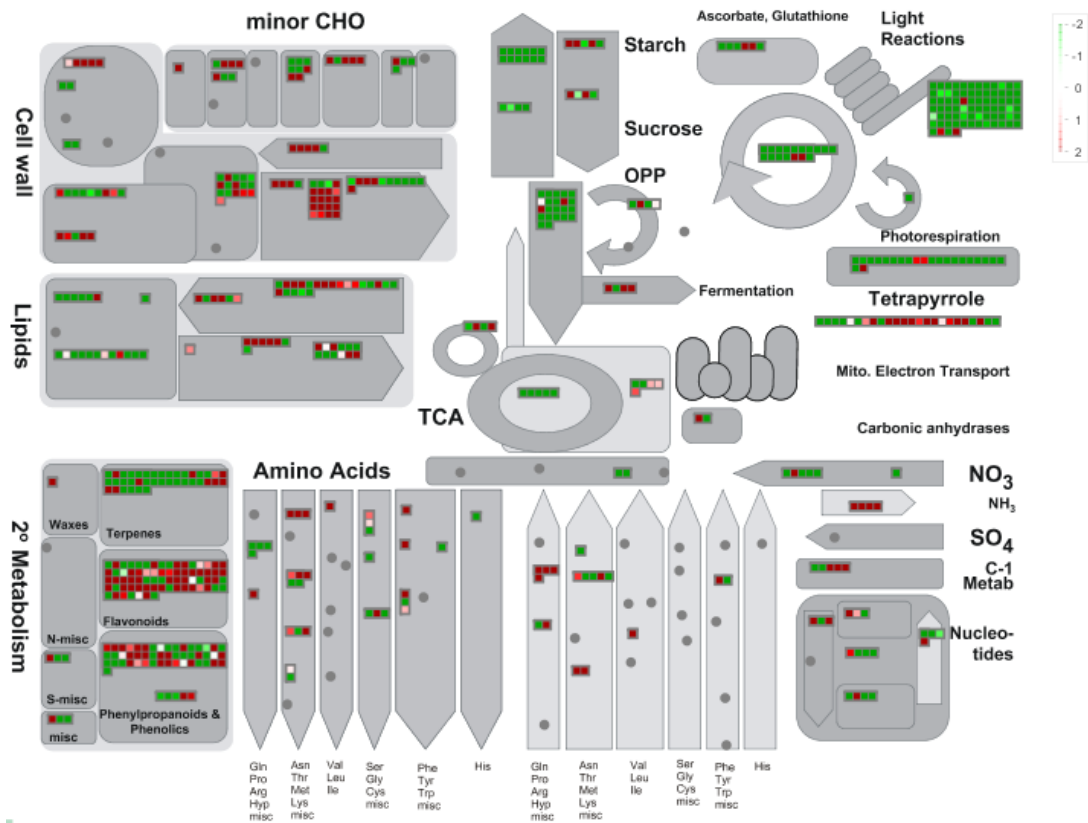

**Supplementary Figure S3.** MAPMAN illustration of *Medicago truncatula* Affymetrix data showing the genes during *M. truncatula*-*P. pachyrhizi* interactions at 12 (A) and 24 (B) hours postinoculation (hpi). Red indicates up-regulation and green indicates down-regulation.

**A****Fig. S4**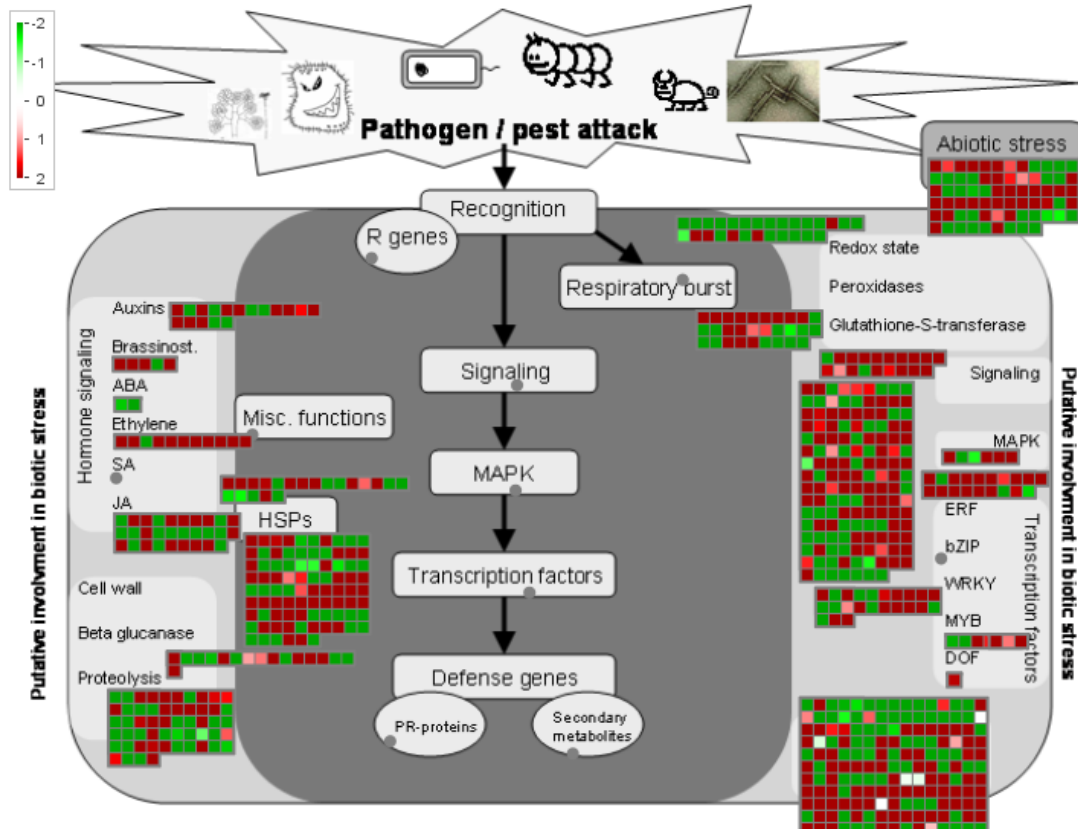**B**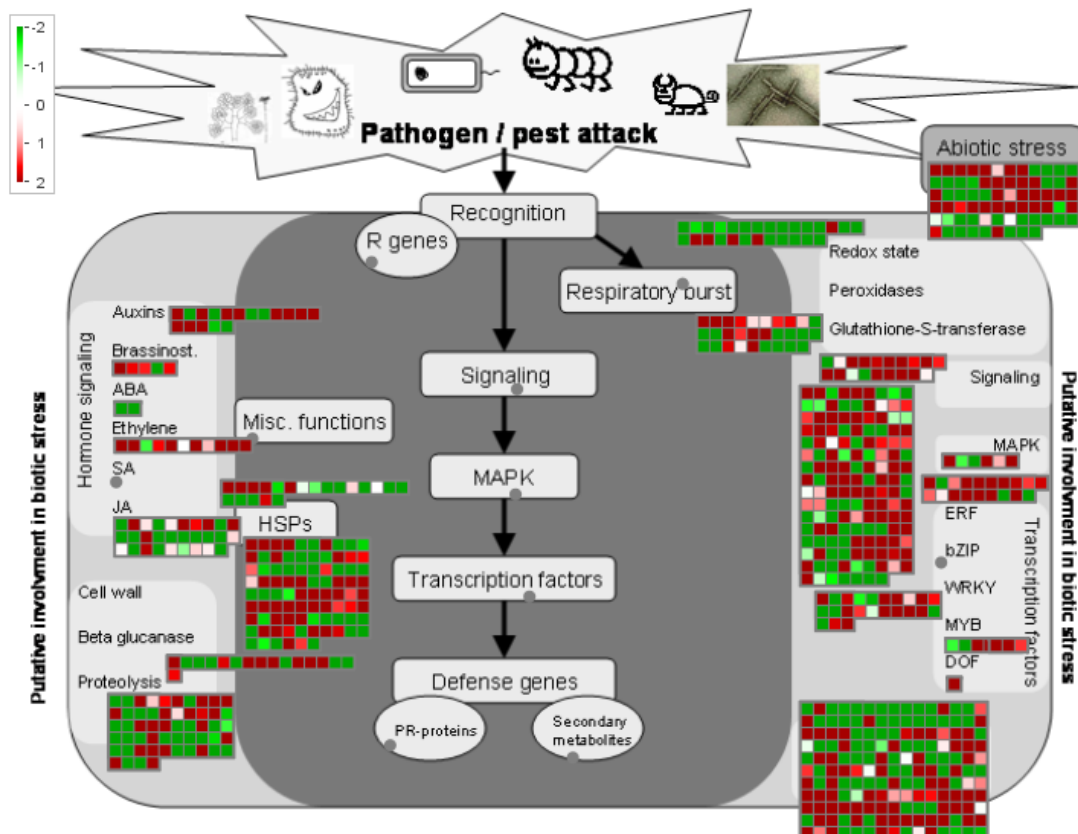

**Supplementary Figure S4.** MAPMAN illustration of *Medicago truncatula* Affymetrix data showing the genes involved in stress responses during *M. truncatula*-*P. pachyrhizi* interactions at 12 (A) and 24 (B) hours post inoculation (hpi). Red indicates up-regulation and green indicates down-regulation.



A

R108

*stay-green*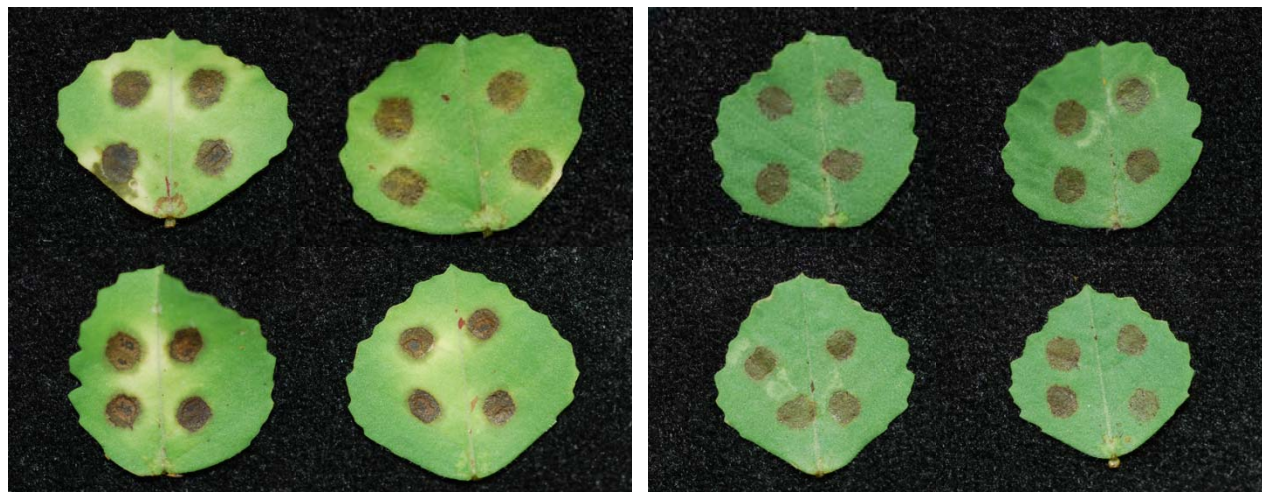

B

*Stay-green* RNAi line

WT

#17

#39

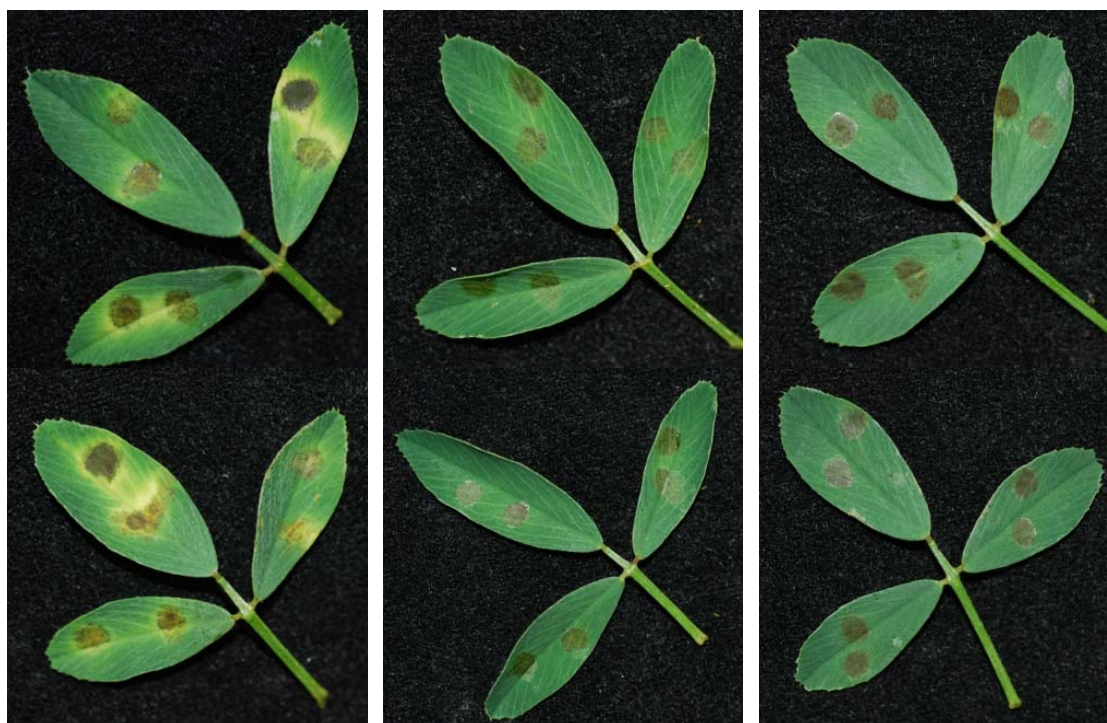

**Supplementary Figure S5.** Disease symptom development of *M. truncatula* and alfalfa leaves inoculated with *Colletotrichum trifolii*. (A) Disease symptom development of *M. truncatula* wild-type R108 and *sgr* mutant at 4 days post-inoculation (dpi). Four-week-old *M. truncatula* wild-type R108 and *sgr* mutant were spot-inoculated with 10  $\mu$ l of  $1 \times 10^6$  spores/mL in 0.005% Tween 20. Photos were taken 5 days after inoculation. (B) Disease symptom development of alfalfa wild-type and *SGR*-RNAi lines at 4 dpi. Alfalfa leaves were inoculated in the same fashion as *M. truncatula* lines described above. All the experiments were repeated at least thrice with similar results.

**Supplementary Table S1. Upregulated genes at 12 hours after inoculation with soybean rust**

| <b>Probesets</b>    | <b>Target Description</b>                      | <b>Fold induction</b> |
|---------------------|------------------------------------------------|-----------------------|
| Mtr.37395.1.S1_at   | Deoxycytidine deaminase                        | 869.00                |
| Mtr.43146.1.S1_at   | Branched-chain-amino-acid aminotransferase 2   | 684.50                |
| Mtr.15537.1.S1_at   | Hypothetical protein                           | 498.39                |
| Mtr.18650.1.S1_at   | Glycoside hydrolase, family 17                 | 483.72                |
| Mtr.20464.1.S1_x_at | Naringenin-chalcone synthase                   | 453.88                |
| Mtr.19796.1.S1_at   | Hypothetical protein                           | 448.29                |
| Mtr.43467.1.S1_at   | Hypothetical protein                           | 425.57                |
| Mtr.37375.1.S1_at   | Hypothetical protein                           | 417.63                |
| Mtr.17526.1.S1_at   | Hypothetical protein                           | 417.11                |
| Mtr.8498.1.S1_s_at  | Asparagine synthetase                          | 388.70                |
| Mtr.22656.1.S1_s_at | Deoxycytidylate deaminase                      | 385.47                |
| Mtr.1538.1.S1_at    | Hypothetical protein                           | 335.94                |
| Mtr.11725.1.S1_at   | Isoflavone synthase                            | 332.58                |
| Mtr.45667.1.S1_x_at | Naringenin-chalcone synthase                   | 328.39                |
| Msa.1736.1.S1_at    | Hypothetical protein                           | 304.80                |
| Mtr.5486.1.S1_s_at  | Hypothetical protein                           | 301.78                |
| Mtr.11267.1.S1_at   | Protein kinase-like protein                    | 273.51                |
| Mtr.35334.1.S1_s_at | Hypothetical protein                           | 262.59                |
| Mtr.18127.1.S1_at   | Hypothetical protein                           | 253.13                |
| Mtr.33212.1.S1_s_at | Beta-glucosidase                               | 228.45                |
| Mtr.8498.1.S1_at    | Asparagine synthetase                          | 222.37                |
| Mtr.44900.1.S1_at   | Hypothetical protein                           | 222.02                |
| Mtr.8417.1.S1_at    | Mitochondrial uncoupling protein (UCP protein) | 215.40                |
| Msa.2530.1.S1_s_at  | Hypothetical protein                           | 214.94                |
| Msa.2901.1.S1_s_at  | Hypothetical protein                           | 211.08                |
| Mtr.44354.1.S1_at   | Cytochrome P450 monooxygenase                  | 210.43                |
| Msa.1879.1.S1_s_at  | Hypothetical protein                           | 199.51                |
| Mtr.40147.1.S1_s_at | Class 10 PR protein                            | 199.02                |
| Mtr.44559.1.S1_at   | Hypothetical protein                           | 198.53                |
| Mtr.37984.1.S1_at   | Adenosine nucleotide translocator              | 194.52                |
| Mtr.43830.1.S1_at   | Hypothetical protein                           | 193.67                |
| Mtr.9372.1.S1_at    | DnaJ protein                                   | 190.99                |
| Mtr.12193.1.S1_at   | RCa12                                          | 189.00                |
| Mtr.40564.1.S1_at   | Beta-glucosidase                               | 188.98                |
| Mtr.45497.1.S1_s_at | Geraniol synthase                              | 187.17                |
| Mtr.40120.1.S1_at   | Cationic peroxidase 1 precursor (PNPC1)        | 181.77                |
| Mtr.15678.1.S1_s_at | Aldo/keto reductase                            | 180.19                |
| Mtr.17404.1.S1_s_at | Aldo/keto reductase                            | 179.94                |
| Msa.1060.1.S1_at    | Hypothetical protein                           | 175.79                |
| Mtr.23578.1.S1_s_at | Polygalacturonase-inhibiting protein precursor | 175.72                |
| Mtr.44496.1.S1_at   | AP2 domain-containing protein AP29-like        | 168.51                |
| Mtr.11851.1.S1_at   | Hypothetical protein                           | 165.21                |
| Mtr.51826.1.S1_at   | Hypothetical protein                           | 164.22                |
| Mtr.35755.1.S1_at   | Hypothetical protein                           | 161.83                |
| Mtr.43284.1.S1_at   | Alcohol dehydroge                              | 145.45                |
| Msa.2530.1.S1_at    | Hypothetical protein                           | 143.16                |
| Mtr.29026.1.S1_at   | Hypothetical protein                           | 142.69                |
| Mtr.10502.1.S1_s_at | Glutathione S-transferase                      | 142.41                |
| Mtr.43363.1.S1_at   | Syringolide-induced protein 13-1-1             | 142.17                |
| Mtr.34114.1.S1_s_at | Pathogenesis related protein                   | 139.27                |
| Mtr.410.1.S1_s_at   | Isoflavone reductase                           | 134.94                |
| Mtr.16278.1.S1_at   | Proteinase inhibitor I12                       | 133.70                |

|                     |                                                              |        |
|---------------------|--------------------------------------------------------------|--------|
| Mtr.43189.1.S1_at   | Disease resistance response protein                          | 131.36 |
| Mtr.17621.1.S1_x_at | Naringenin-chalcone synthase                                 | 128.32 |
| Mtr.17612.1.S1_x_at | Naringenin-chalcone synthase                                 | 127.58 |
| Mtr.42416.1.S1_at   | Hypothetical protein                                         | 127.45 |
| Mtr.21662.1.S1_at   | Plant integral membrane prote                                | 126.40 |
| Mtr.37358.1.S1_s_at | Cytochrome P450 71B13                                        | 126.22 |
| Mtr.42989.1.S1_at   | Thaumatococcus-like protein PR-5b                            | 126.14 |
| Mtr.42268.1.S1_at   | Inositol oxygenase (Myo-inositol oxygenase)                  | 125.59 |
| Mtr.43008.1.S1_at   | Hypothetical protein                                         | 124.73 |
| Mtr.48534.1.S1_at   | Cytochrome b561 / ferric reductase                           | 122.44 |
| Mtr.34158.1.S1_s_at | Hypothetical protein                                         | 120.76 |
| Mtr.15831.1.S1_s_at | Hypothetical protein                                         | 120.18 |
| Mtr.11055.1.S1_at   | SRG1 protein                                                 | 119.87 |
| Mtr.10434.1.S1_at   | SRG1 protein                                                 | 117.95 |
| Mtr.22592.1.S1_at   | Cytosolic fructose-1,6-bisphosphatase                        | 115.88 |
| Mtr.6667.1.S1_at    | Cytochrome P450 monooxygenase                                | 115.48 |
| Mtr.46391.1.S1_at   | Hypothetical protein                                         | 111.35 |
| Mtr.49411.1.S1_at   | Hypothetical protein                                         | 111.22 |
| Mtr.16615.1.S1_at   | Prephenate dehydratase                                       | 108.21 |
| Mtr.37356.1.S1_at   | Cytochrome P450 71B25                                        | 107.68 |
| Mtr.43254.1.S1_at   | Hypothetical protein                                         | 105.29 |
| Mtr.37033.1.S1_s_at | Metalloproteinase                                            | 103.37 |
| Mtr.79.1.S1_at      | Hypothetical protein                                         | 103.23 |
| Mtr.43279.1.S1_at   | Proline dehydrogenase                                        | 102.24 |
| Mtr.11773.1.S1_s_at | Hypothetical protein                                         | 98.32  |
| Mtr.38764.1.S1_at   | Cytochrome P450                                              | 96.76  |
| Mtr.40122.1.S1_s_at | Chalcone synthase 4                                          | 95.35  |
| Mtr.43203.1.S1_at   | Hypothetical protein                                         | 94.75  |
| Mtr.35677.1.S1_at   | Zinc finger protein family-like                              | 94.56  |
| Mtr.42129.1.S1_at   | AP2 domain transcription factor                              | 94.43  |
| Mtr.49341.1.S1_at   | Peptidase                                                    | 93.09  |
| Mtr.17616.1.S1_x_at | Naringenin-chalcone synthase                                 | 92.61  |
| Mtr.43594.1.S1_at   | Hypothetical protein                                         | 92.49  |
| Mtr.45394.1.S1_at   | Synaptobrevin-like protein                                   | 91.96  |
| Mtr.10368.1.S1_at   | Chalcone synthase 8                                          | 91.23  |
| Mtr.33545.1.S1_s_at | Non-cyanogenic beta-glucosidase                              | 91.01  |
| Mtr.42255.1.S1_at   | Hypothetical protein                                         | 90.54  |
| Mtr.43259.1.S1_at   | Hypothetical protein                                         | 88.23  |
| Mtr.43942.1.S1_s_at | Hypothetical protein                                         | 87.16  |
| Mtr.10760.1.S1_at   | N-hydroxycinnamoyl/benzoyltransferase-like protein           | 87.12  |
| Mtr.35802.1.S1_at   | Hypothetical protein                                         | 85.55  |
| Mtr.41059.1.S1_at   | Hypothetical protein                                         | 84.57  |
| Mtr.43159.1.S1_at   | Bacterial-induced peroxidase                                 | 82.48  |
| Mtr.12748.1.S1_at   | Hypothetical protein                                         | 82.45  |
| Mtr.28242.1.S1_at   | Beta-glucan-elicitor receptor                                | 81.70  |
| Mtr.331.1.S1_at     | Chitinase                                                    | 79.77  |
| Mtr.5385.1.S1_at    | Ethylene reponse factor-like AP2 domain transcription factor | 79.56  |
| Mtr.10391.1.S1_at   | Class 10 PR protein                                          | 78.99  |
| Mtr.47292.1.S1_at   | Hypothetical protein                                         | 78.70  |
| Mtr.13321.1.S1_at   | Pyruvate, phosphate dikinase                                 | 78.51  |
| Mtr.27937.1.S1_at   | Nodulin-like protein                                         | 78.41  |
| Mtr.23418.1.S1_s_at | AP2 domain transcription factor                              | 78.36  |
| Mtr.34416.1.S1_at   | Pyruvate, orthophosphate dikinase                            | 77.60  |
| Mtr.4663.1.S1_at    | Light-inducible protein ATLS1                                | 77.52  |



|                     |                                           |       |
|---------------------|-------------------------------------------|-------|
| Mtr.13532.1.S1_at   | Cytochrome P450                           | 77.16 |
| Mtr.23863.1.S1_at   | Glucan 1,3-beta-glucosidase               | 76.96 |
| Mtr.8652.1.S1_at    | 6a-hydroxymaackiain methyltransferase     | 76.69 |
| Mtr.38035.1.S1_at   | S-locus-like receptor protein kinase      | 76.06 |
| Mtr.12424.1.S1_at   | Disease resistance response protein       | 75.35 |
| Mtr.34968.1.S1_at   | Nucellin-like protein                     | 75.13 |
| Mtr.43196.1.S1_at   | Hypothetical protein                      | 74.50 |
| Mtr.30508.1.S1_at   | Isoflavone reductase                      | 74.11 |
| Mtr.12487.1.S1_at   | Cyanogenic Beta-Glucosidase               | 73.71 |
| Mtr.43852.1.S1_at   | Acidic glucanase                          | 73.13 |
| Mtr.23580.1.S1_at   | Polygalacturonase inhibitor protein       | 72.34 |
| Mtr.21098.1.S1_at   | Oxysterol-binding protein                 | 71.25 |
| Mtr.30776.1.S1_at   | Patatin-like protein 1                    | 71.22 |
| Mtr.2105.1.S1_at    | Hypothetical protein                      | 70.71 |
| Mtr.41238.1.S1_at   | Hypothetical protein                      | 70.05 |
| Mtr.45666.1.S1_at   | Glycoside hydrolase, family 32            | 69.96 |
| Mtr.22854.1.S1_at   | bHLH protein family                       | 69.69 |
| Mtr.10435.1.S1_s_at | SRG1 protein                              | 69.13 |
| Mtr.15261.1.S1_s_at | Curculin-like (mannose-binding) lectin    | 68.67 |
| Mtr.25008.1.S1_x_at | Vestitone reductase                       | 67.12 |
| Mtr.6976.1.S1_at    | Hypothetical protein                      | 67.03 |
| Mtr.10272.1.S1_at   | Calmodulin                                | 67.02 |
| Mtr.10466.1.S1_at   | Hypothetical protein                      | 67.00 |
| Mtr.37376.1.S1_s_at | Hypothetical protein                      | 65.60 |
| Mtr.38079.1.S1_at   | Calcium/calmodulin protein kinase 1       | 65.36 |
| Mtr.42451.1.S1_at   | Bimodular protein                         | 64.68 |
| Mtr.10122.1.S1_at   | Nine-cis-epoxycarotenoid dioxygenase1     | 62.89 |
| Mtr.10573.1.S1_at   | Hypothetical protein                      | 62.88 |
| Msa.1231.1.S1_at    | Hypothetical protein                      | 62.47 |
| Mtr.25021.1.S1_at   | Vestitone reductase                       | 62.45 |
| Mtr.45350.1.S1_at   | Hypothetical protein                      | 61.93 |
| Mtr.41478.1.S1_at   | Class 10 PR protein                       | 60.99 |
| Mtr.8507.1.S1_at    | Pathogenesis related protein              | 60.07 |
| Mtr.34634.1.S1_at   | Epoxide hydrolase-like protein            | 59.63 |
| Mtr.51252.1.S1_s_at | Hypothetical protein                      | 59.56 |
| Mtr.6639.1.S1_s_at  | Hypothetical protein                      | 58.91 |
| Mtr.8558.1.S1_at    | EDGP precursor                            | 58.57 |
| Mtr.13782.1.S1_s_at | Hypothetical protein                      | 57.88 |
| Mtr.17910.1.S1_at   | Protein kinase                            | 57.86 |
| Mtr.37378.1.S1_at   | Hypothetical protein                      | 57.30 |
| Mtr.48829.1.S1_at   | Peptidase aspartic                        | 56.68 |
| Mtr.43772.1.S1_at   | Hypothetical protein                      | 56.35 |
| Mtr.40890.1.S1_at   | WRKY transcription factor 40              | 55.92 |
| Mtr.38234.1.S1_at   | Epoxide hydrolase-like protein            | 55.74 |
| Mtr.40553.1.S1_at   | Hypothetical protein                      | 54.83 |
| Mtr.35994.1.S1_at   | Hypothetical protein                      | 54.74 |
| Mtr.40563.1.S1_at   | Beta-Glucosidase                          | 54.71 |
| Mtr.45003.1.S1_at   | Non-cyanogenic beta-glucosidase           | 54.68 |
| Mtr.38513.1.S1_at   | Syringolide-induced protein 14-1-1        | 54.53 |
| Mtr.6645.1.S1_at    | Lysine and histidine specific transporter | 54.39 |
| Mtr.41053.1.S1_at   | AT-hook DNA-binding protein               | 54.03 |
| Mtr.5060.1.S1_at    | Cyanogenic Beta-Glucosidase               | 54.00 |
| Mtr.4441.1.S1_at    | Hypothetical protein                      | 52.91 |
| Mtr.12502.1.S1_at   | Laccase-like protein                      | 52.51 |

|                     |                                                     |       |
|---------------------|-----------------------------------------------------|-------|
| Mtr.40293.1.S1_at   | Glutathione S-transferase                           | 52.51 |
| Mtr.16207.1.S1_at   | Hypothetical protein                                | 52.42 |
| Mtr.44487.1.S1_at   | Hypothetical protein                                | 52.41 |
| Mtr.42966.1.S1_at   | Disease resistance response protein Pi49 (PR10)     | 52.33 |
| Mtr.40504.1.S1_at   | O-methyltransferase                                 | 52.21 |
| Mtr.34185.1.S1_at   | Hypothetical protein                                | 50.05 |
| Mtr.11104.1.S1_s_at | Hypothetical protein                                | 48.95 |
| Mtr.8442.1.S1_at    | Hydroxyproline-rich glycoprotein (HRGP)             | 47.72 |
| Mtr.5750.1.S1_at    | Nicotiana EREBP-3-like protein                      | 47.69 |
| Mtr.35325.1.S1_at   | Hypothetical protein                                | 47.63 |
| Mtr.45373.1.S1_at   | Hypothetical protein                                | 47.56 |
| Mtr.34199.1.S1_at   | 2-oxoglutarate-dependent oxygenase                  | 47.46 |
| Mtr.10692.1.S1_at   | Cytochrome P450 76C4                                | 47.27 |
| Mtr.32248.1.S1_at   | 3-hydroxyisobutyrate dehydrogenase-like protein     | 47.13 |
| Mtr.10898.1.S1_at   | Hypothetical protein                                | 46.10 |
| Mtr.47295.1.S1_x_at | Polygalacturonase inhibitor protein                 | 46.05 |
| Mtr.37316.1.S1_at   | NAD(P)H dependent 6'-deoxychalcone synthase         | 46.02 |
| Mtr.18422.1.S1_at   | Hypothetical protein                                | 45.91 |
| Mtr.47992.1.S1_at   | Hypothetical protein                                | 45.69 |
| Mtr.33217.1.S1_at   | Syringolide-induced protein                         | 45.64 |
| Mtr.14428.1.S1_at   | Naringenin-chalcone synthase                        | 45.42 |
| Mtr.37275.1.S1_at   | Pathogen-inducible alpha-dioxygenase                | 45.41 |
| Mtr.14224.1.S1_at   | Proteinase inhibitor I13                            | 45.25 |
| Mtr.10896.1.S1_s_at | WIZZ                                                | 45.14 |
| Mtr.27695.1.S1_at   | Auxin response factor 30                            | 44.90 |
| Mtr.1402.1.S1_at    | Hypothetical protein                                | 44.76 |
| Mtr.2340.1.S1_s_at  | Hypothetical protein                                | 44.16 |
| Mtr.40601.1.S1_s_at | Collagen-like protein                               | 44.02 |
| Mtr.40598.1.S1_at   | Hypothetical protein                                | 43.84 |
| Mtr.39844.1.S1_at   | Hypothetical protein                                | 43.76 |
| Mtr.24901.1.S1_at   | Phospholipase                                       | 43.73 |
| Mtr.42078.1.S1_at   | Anthocyanin 5-aromatic acyltransferase-like protein | 42.73 |
| Mtr.10396.1.S1_at   | Syringolide-induced protein                         | 42.60 |
| Mtr.12616.1.S1_at   | Cytochrome P450-like protein                        | 42.41 |
| Mtr.9091.1.S1_at    | Hypothetical protein                                | 42.39 |
| Mtr.8601.1.S1_at    | Hypothetical protein                                | 42.32 |
| Mtr.13317.1.S1_at   | Hypothetical protein                                | 42.09 |
| Mtr.49090.1.S1_at   | GCN5-related N-acetyltransferase                    | 42.00 |
| Mtr.7260.1.S1_at    | Ethylene-induced esterase                           | 41.86 |
| Msa.2552.1.S1_at    | Hypothetical protein                                | 41.68 |
| Msa.2942.1.S1_s_at  | Hypothetical protein                                | 41.24 |
| Mtr.39762.1.S1_at   | Chlorophyllase 1                                    | 41.00 |
| Mtr.9846.1.S1_at    | Hypothetical protein                                | 40.92 |
| Mtr.10427.1.S1_at   | Hypothetical protein                                | 40.55 |
| Mtr.11565.1.S1_at   | Patatin-like protein 1                              | 40.32 |
| Mtr.11047.1.S1_at   | Mitogen-activated protein kinase 4                  | 40.13 |
| Mtr.38043.1.S1_at   | Glucosyltransferase-10                              | 39.78 |
| Mtr.20344.1.S1_at   | Zn-finger, RING protein                             | 39.49 |
| Mtr.28790.1.S1_at   | Hypothetical protein                                | 39.47 |
| Mtr.25362.1.S1_s_at | LEDI-5c protein                                     | 39.38 |
| Mtr.39322.1.S1_at   | UDP-glucuronosyltransferase                         | 38.82 |
| Mtr.10319.1.S1_at   | Pprg2 protein                                       | 38.74 |
| Mtr.18521.1.S1_at   | Thioredoxin-related protein                         | 38.71 |
| Mtr.33275.1.S1_s_at | Cell wall integrity and stress response component 4 | 38.70 |

|                     |                                                               |       |
|---------------------|---------------------------------------------------------------|-------|
| Mtr.51082.1.S1_at   | Trypsin-alpha amylase inhibitor                               | 38.63 |
| Mtr.14428.1.S1_x_at | Naringenin-chalcone synthase                                  | 38.63 |
| Mtr.48768.1.S1_at   | Gibberellin regulated protein                                 | 38.44 |
| Mtr.6666.1.S1_at    | Hypothetical protein                                          | 38.41 |
| Mtr.42263.1.S1_s_at | Hypothetical protein                                          | 38.29 |
| Mtr.51557.1.S1_at   | Glycoside hydrolase, family 19                                | 38.28 |
| Mtr.13239.1.S1_at   | Hypothetical protein                                          | 38.24 |
| Mtr.5695.1.S1_at    | Hypothetical protein                                          | 38.00 |
| Mtr.10317.1.S1_at   | Pprg2 protein                                                 | 38.00 |
| Mtr.5785.1.S1_s_at  | PDR7 ABC transporter                                          | 37.94 |
| Mtr.1203.1.S1_at    | CCR4-associated factor-related protein                        | 37.90 |
| Mtr.9569.1.S1_at    | Thaumatococcus-like protein                                   | 37.49 |
| Mtr.44326.1.S1_at   | Ephrin type-A receptor 5                                      | 37.22 |
| Mtr.41268.1.S1_at   | Serine/threonine-specific protein kinase APK2a                | 37.03 |
| Mtr.5791.1.S1_at    | Malonyl CoA:anthocyanin 3-O-glucoside-6"-O-malonyltransferase | 37.02 |
| Mtr.28311.1.S1_s_at | Hypothetical protein                                          | 36.99 |
| Mtr.12662.1.S1_at   | Patatin-like protein 1                                        | 36.92 |
| Msa.886.1.S1_s_at   | Hypothetical protein                                          | 36.59 |
| Mtr.4593.1.S1_at    | Histidine amino acid transporter                              | 36.43 |
| Mtr.18602.1.S1_at   | Pathogenesis-related transcriptional factor                   | 36.40 |
| Mtr.48557.1.S1_at   | Hypothetical protein                                          | 36.36 |
| Mtr.40588.1.S1_at   | Glutathione S-transferase GST 13                              | 35.98 |
| Mtr.12675.1.S1_at   | Hypothetical protein                                          | 35.94 |
| Mtr.43009.1.S1_s_at | Isoflavone 2'-hydroxylase, complete                           | 35.63 |
| Mtr.39214.1.S1_at   | Hypothetical protein                                          | 35.43 |
| Mtr.11007.1.S1_at   | Avr9/Cf-9 rapidly elicited protein 132                        | 34.71 |
| Mtr.43199.1.S1_at   | Hypothetical protein                                          | 34.46 |
| Mtr.43280.1.S1_x_at | Cyanogenic Beta-Glucosidase                                   | 34.43 |
| Mtr.42540.1.S1_at   | Elicitor-inducible cytochrome P450                            | 34.14 |
| Mtr.34175.1.S1_at   | Peroxidase 5                                                  | 34.04 |
| Mtr.20486.1.S1_at   | Trp repressor/replication initiator                           | 33.74 |
| Mtr.9107.1.S1_at    | Hypothetical protein                                          | 33.66 |
| Mtr.15250.1.S1_at   | ATPase                                                        | 33.11 |
| Mtr.10311.1.S1_at   | Pprg2 protein                                                 | 33.00 |
| Mtr.12470.1.S1_at   | Syringolide-induced protein 13-1-1                            | 32.73 |
| Mtr.10592.1.S1_at   | Isoflavone reductase                                          | 32.49 |
| Mtr.38241.1.S1_at   | Hypothetical protein                                          | 32.49 |
| Mtr.47795.1.S1_at   | Hypothetical protein                                          | 32.46 |
| Mtr.20618.1.S1_s_at | Hypothetical protein                                          | 32.37 |
| Mtr.8666.1.S1_s_at  | Hypothetical protein                                          | 32.31 |
| Mtr.34121.1.S1_at   | Hypothetical protein                                          | 32.31 |
| Mtr.39679.1.S1_at   | Hypothetical protein                                          | 32.27 |
| Mtr.40605.1.S1_at   | Xyloglucan-specific fungal endoglucanase inhibitor protein    | 32.17 |
| Mtr.40412.1.S1_at   | Hypothetical protein                                          | 31.96 |
| Mtr.43569.1.S1_at   | Medicago nodulin N21-like protein                             | 31.87 |
| Mtr.29306.1.S1_at   | Hypothetical protein                                          | 31.57 |
| Mtr.34720.1.S1_at   | Hypothetical protein                                          | 31.52 |
| Mtr.37253.1.S1_at   | Amino acid transporter-like protein 1                         | 31.51 |
| Mtr.45572.1.S1_at   | Hypothetical protein                                          | 31.21 |
| Mtr.48647.1.S1_s_at | Cellulose synthase                                            | 31.20 |
| Mtr.39165.1.S1_at   | Cobalamin synthase                                            | 30.87 |
| Mtr.41495.1.S1_at   | Hypothetical protein                                          | 30.75 |
| Mtr.46788.1.S1_at   | L-allo-threonine aldolase                                     | 30.65 |
| Mtr.34867.1.S1_s_at | Hypothetical protein                                          | 30.53 |

|                     |                                           |       |
|---------------------|-------------------------------------------|-------|
| Mtr.40377.1.S1_at   | Cysteine proteinase inhibitor             | 30.23 |
| Mtr.12615.1.S1_at   | Pathogenesis-related protein PR10A        | 29.95 |
| Mtr.12723.1.S1_at   | Hypothetical protein                      | 29.90 |
| Mtr.38072.1.S1_at   | Hypothetical protein                      | 29.63 |
| Mtr.5486.1.S1_at    | Hypothetical protein                      | 29.25 |
| Mtr.49999.1.S1_at   | Hypothetical protein                      | 29.13 |
| Mtr.22459.1.S1_at   | Hypothetical protein                      | 28.90 |
| Mtr.23575.1.S1_x_at | Polygalacturonase inhibitor protein       | 28.70 |
| Mtr.12466.1.S1_at   | Chitinase                                 | 28.59 |
| Mtr.9819.1.S1_at    | Hypothetical protein                      | 28.50 |
| Mtr.8559.1.S1_at    | Hypothetical protein                      | 28.49 |
| Mtr.41091.1.S1_at   | Mitogen-activated protein kinase MMK2     | 28.43 |
| Mtr.41563.1.S1_s_at | Ring finger E3 ligase                     | 28.37 |
| Mtr.43193.1.S1_at   | Glutamate dehydrogenase 3                 | 28.36 |
| Mtr.12485.1.S1_at   | Hypothetical protein                      | 28.29 |
| Mtr.38067.1.S1_at   | Hypothetical protein                      | 28.24 |
| Mtr.26304.1.S1_at   | Hypothetical protein                      | 28.14 |
| Mtr.37973.1.S1_at   | Hypothetical protein                      | 27.98 |
| Mtr.6154.1.S1_s_at  | Wall-associated kinase                    | 27.87 |
| Mtr.38997.1.S1_at   | Serine/threonine protein kinase           | 27.79 |
| Mtr.4996.1.S1_at    | Hypothetical protein                      | 27.62 |
| Mtr.44504.1.S1_at   | Beta-glucan-elicitor receptor             | 27.62 |
| Mtr.31521.1.S1_at   | Lysine and histidine specific transporter | 27.34 |
| Mtr.40339.1.S1_s_at | Hypothetical protein                      | 27.16 |
| Mtr.22423.1.S1_at   | Hin1 like protein                         | 27.01 |
| Mtr.35430.1.S1_s_at | Hypothetical protein                      | 26.84 |
| Mtr.27130.1.S1_s_at | Hypothetical protein                      | 26.76 |
| Mtr.17570.1.S1_at   | Zn-finger, RING protein                   | 26.73 |
| Mtr.12653.1.S1_at   | Hypothetical protein                      | 26.51 |
| Mtr.39424.1.S1_at   | Serine/threonine protein kinase           | 26.35 |
| Mtr.3130.1.S1_at    | Hypothetical protein                      | 26.24 |
| Mtr.39384.1.S1_at   | Hypothetical protein                      | 26.24 |
| Mtr.1951.1.S1_s_at  | Zinc finger protein                       | 26.17 |
| Mtr.8645.1.S1_at    | Riboflavin biosynthesis protein ribA      | 26.16 |
| Mtr.15278.1.S1_s_at | Zn-finger, C2H2 type                      | 26.08 |
| Mtr.41237.1.S1_at   | Nt-gh3 deduced protein                    | 25.61 |
| Mtr.32914.1.S1_at   | Ethylene-induced esterase                 | 25.61 |
| Mtr.12906.1.S1_at   | Glutamate decarboxylase 4a                | 25.30 |
| Mtr.10689.1.S1_at   | Translation factor EF-1 alpha             | 25.29 |
| Mtr.15525.1.S1_at   | Dynein light chain                        | 25.17 |
| Mtr.11959.1.S1_at   | Serine/threonine protein phosphatase 2A   | 25.15 |
| Mtr.8725.1.S1_at    | Hypothetical protein                      | 25.05 |
| Mtr.33508.1.S1_s_at | Medicago nodulin N21-like protein         | 25.00 |
| Mtr.43769.1.S1_at   | Seed imbibition protein                   | 24.83 |
| Mtr.281.1.S1_at     | Trehalose-6-phosphate phosphatase         | 24.82 |
| Mtr.11550.1.S1_at   | Diacylglycerol kinase variant B           | 24.82 |
| Mtr.10079.1.S1_at   | Hypothetical protein                      | 24.80 |
| Mtr.1299.1.S1_s_at  | Cytochrome P450 93B1                      | 24.79 |
| Mtr.6834.1.S1_at    | Zeatin O-glucosyltransferase              | 24.75 |
| Mtr.7570.1.S1_at    | Hypothetical protein                      | 24.70 |
| Mtr.27711.1.S1_at   | Hypothetical protein                      | 24.69 |
| Mtr.40763.1.S1_at   | Hypothetical protein                      | 24.66 |
| Mtr.15339.1.S1_at   | Homeodomain-like protein                  | 24.46 |
| Mtr.40340.1.S1_at   | Alkaline alpha galactosidase I            | 24.38 |

|                     |                                                              |       |
|---------------------|--------------------------------------------------------------|-------|
| Mtr.29300.1.S1_s_at | Hypothetical protein                                         | 24.35 |
| Mtr.1493.1.S1_at    | Hypothetical protein                                         | 24.08 |
| Mtr.6654.1.S1_at    | Hypothetical protein                                         | 24.03 |
| Mtr.11947.1.S1_at   | Early growth response protein                                | 23.95 |
| Mtr.12710.1.S1_at   | Syringolide-induced protein B13-1-1                          | 23.95 |
| Msa.1042.1.S1_at    | Hypothetical protein                                         | 23.89 |
| Mtr.14283.1.S1_at   | Aminotransferase class-III                                   | 23.83 |
| Mtr.17788.1.S1_at   | Hypothetical protein                                         | 23.76 |
| Mtr.43513.1.S1_at   | Syringolide-induced protein 19-1-5                           | 23.72 |
| Msa.1604.1.S1_at    | Hypothetical protein                                         | 23.64 |
| Mtr.9223.1.S1_at    | Ethylene reponse factor-like AP2 domain transcription factor | 23.58 |
| Mtr.38844.1.S1_at   | Hypothetical protein                                         | 23.46 |
| Msa.3005.1.S1_at    | Hypothetical protein                                         | 23.43 |
| Mtr.49305.1.S1_at   | Fatty acid elongase                                          | 23.24 |
| Mtr.38654.1.S1_at   | Hypothetical protein                                         | 23.02 |
| Mtr.40195.1.S1_at   | Pectin methylesterase 5                                      | 22.79 |
| Mtr.31314.1.S1_at   | NAC-type DNA binding protein                                 | 22.65 |
| Mtr.44416.1.S1_at   | WRKY-type DNA binding protein                                | 22.64 |
| Mtr.33206.1.S1_s_at | Lustrin A-like protein                                       | 22.43 |
| Mtr.11520.1.S1_at   | Protein phosphatase 2C                                       | 22.37 |
| Mtr.39059.1.S1_at   | Hypothetical protein                                         | 22.28 |
| Mtr.9661.1.S1_at    | Scarecrow-like 14                                            | 22.24 |
| Mtr.18629.1.S1_at   | Hypothetical protein                                         | 22.21 |
| Mtr.50682.1.S1_at   | 14-3-3 protein                                               | 22.07 |
| Mtr.26629.1.S1_at   | CCR4-associated factor 1-related protein                     | 21.97 |
| Mtr.49572.1.S1_x_at | Naringenin-chalcone synthase                                 | 21.91 |
| Mtr.25007.1.S1_at   | Vestitone reductase                                          | 21.89 |
| Mtr.43646.1.S1_at   | Hypothetical protein                                         | 21.86 |
| Mtr.41694.1.S1_s_at | AP2 domain transcription factor                              | 21.86 |
| Mtr.27129.1.S1_at   | Zinc finger protein                                          | 21.78 |
| Mtr.37579.1.S1_at   | Branched chain alpha-keto acid dehydrogenase E2 subunit      | 21.74 |
| Mtr.11219.1.S1_at   | Hypothetical protein                                         | 21.66 |
| Mtr.9254.1.S1_at    | Phe ammonia lyase                                            | 21.57 |
| Mtr.38121.1.S1_at   | Avr9/Cf-9 rapidly elicited protein                           | 21.52 |
| Mtr.48287.1.S1_s_at | Hypothetical protein                                         | 21.51 |
| Mtr.39677.1.S1_x_at | Immunoglobulin heavy chain variable region                   | 21.51 |
| Mtr.39487.1.S1_s_at | Lipoxygenase                                                 | 21.45 |
| Mtr.43916.1.S1_at   | Isoflavone reductase                                         | 21.39 |
| Mtr.37455.1.S1_at   | Glucosyltransferase-13                                       | 21.35 |
| Mtr.43921.1.S1_at   | Hypothetical protein                                         | 21.14 |
| Mtr.38270.1.S1_at   | ABA-responsive protein                                       | 21.11 |
| Mtr.20803.1.S1_at   | Hypothetical protein                                         | 21.09 |
| Mtr.10438.1.S1_at   | Kunitz proteinase inhibitor-1                                | 20.98 |
| Mtr.18040.1.S1_at   | Hypothetical protein                                         | 20.98 |
| Mtr.22903.1.S1_at   | Chitinase (Class II)                                         | 20.89 |
| Mtr.43514.1.S1_s_at | Syringolide-induced protein 19-1-5                           | 20.88 |
| Msa.2919.1.S1_at    | Hypothetical protein                                         | 20.83 |
| Mtr.8646.1.S1_at    | Nine-cis-epoxycarotenoid dioxygenase1                        | 20.79 |
| Mtr.25575.1.S1_x_at | Hypothetical protein                                         | 20.78 |
| Mtr.42819.1.S1_at   | Hypothetical protein                                         | 20.77 |
| Mtr.6769.1.S1_at    | Hypothetical protein                                         | 20.61 |
| Mtr.15010.1.S1_s_at | Homeodomain-like                                             | 20.59 |
| Mtr.11354.1.S1_at   | Bacterial-induced peroxidase                                 | 20.55 |
| Mtr.45768.1.S1_at   | Serine/threonine protein kinase                              | 20.49 |

|                     |                                                              |       |
|---------------------|--------------------------------------------------------------|-------|
| Mtr.15332.1.S1_at   | Homeodomain-like                                             | 20.48 |
| Mtr.18.1.S1_at      | Hypothetical protein                                         | 20.43 |
| Mtr.33892.1.S1_at   | Zinc finger protein constans-like 6                          | 20.42 |
| Mtr.40177.1.S1_at   | Hypothetical protein                                         | 20.37 |
| Mtr.9258.1.S1_at    | Receptor-like protein kinase                                 | 20.37 |
| Mtr.28194.1.S1_at   | Flavonol 3-O-glucosyltransferase 5                           | 20.34 |
| Mtr.31288.1.S1_at   | Isoflavonoid glucosyltransferase                             | 20.33 |
| Mtr.14737.1.S1_at   | Protein kinase                                               | 20.28 |
| Mtr.37377.1.S1_at   | Hypothetical protein                                         | 20.10 |
| Msa.3122.1.S1_at    | Hypothetical protein                                         | 19.96 |
| Mtr.12749.1.S1_at   | Hypothetical protein                                         | 19.95 |
| Mtr.42084.1.S1_at   | Hypothetical protein                                         | 19.95 |
| Mtr.40882.1.S1_at   | Aldehyde dehydrogenase                                       | 19.92 |
| Mtr.43278.1.S1_at   | Cellulose synthase                                           | 19.92 |
| Mtr.50276.1.S1_at   | Phosphoinositide-binding clathrin adaptor                    | 19.91 |
| Mtr.51996.1.S1_at   | Hypothetical protein                                         | 19.85 |
| Mtr.19594.1.S1_at   | Cyclin-like F-box                                            | 19.82 |
| Mtr.32898.1.S1_at   | Protein phosphatase 2C                                       | 19.79 |
| Mtr.46200.1.S1_at   | CCCH-type zinc finger protein                                | 19.78 |
| Mtr.39160.1.S1_at   | Hypothetical protein                                         | 19.58 |
| Mtr.41299.1.S1_at   | Hypothetical protein                                         | 19.51 |
| Mtr.35324.1.S1_at   | Peroxidase 2                                                 | 19.48 |
| Mtr.10127.1.S1_s_at | Phospholipase                                                | 19.48 |
| Mtr.10895.1.S1_at   | Hypothetical protein                                         | 19.38 |
| Mtr.5797.1.S1_at    | Hypothetical protein                                         | 19.36 |
| Mtr.38547.1.S1_at   | Tuber-specific and sucrose-responsive element binding factor | 19.34 |
| Mtr.44391.1.S1_at   | Cytochrome P450 82A2                                         | 19.31 |
| Mtr.43585.1.S1_at   | 1-deoxy-D-xylulose 5-phosphate synthase 2                    | 19.31 |
| Mtr.43144.1.S1_at   | Hypothetical protein                                         | 19.27 |
| Mtr.41670.1.S1_at   | F-box protein                                                | 19.23 |
| Mtr.2844.1.S1_at    | Hypothetical protein                                         | 19.20 |
| Mtr.43280.1.S1_at   | Cyanogenic Beta-Glucosidase                                  | 19.18 |
| Mtr.50317.1.S1_at   | Zn-finger, RING protein                                      | 19.11 |
| Mtr.41653.1.S1_at   | Mitochondrial phosphate translocator                         | 19.09 |
| Mtr.41841.1.S1_at   | Hypothetical protein                                         | 19.05 |
| Mtr.38200.1.S1_at   | Hypothetical protein                                         | 19.00 |
| Mtr.28801.1.S1_at   | Caffeoyl-CoA O-methyltransferase                             | 18.98 |
| Mtr.12141.1.S1_at   | Hypothetical protein                                         | 18.94 |
| Mtr.7503.1.S1_at    | Hypothetical protein                                         | 18.87 |
| Mtr.16167.1.S1_at   | Hypothetical protein                                         | 18.75 |
| Mtr.43252.1.S1_at   | Avr9/Cf-9 rapidly elicited protein                           | 18.71 |
| Mtr.26218.1.S1_s_at | Isovaleryl-CoA Dehydrogenase                                 | 18.66 |
| Mtr.45405.1.S1_at   | Hypothetical protein                                         | 18.60 |
| Mtr.11656.1.S1_at   | Hypothetical protein                                         | 18.59 |
| Mtr.40481.1.S1_at   | Isovaleryl-CoA Dehydrogenase                                 | 18.57 |
| Mtr.6489.1.S1_at    | Glutathione S-transferase GST 15                             | 18.55 |
| Mtr.10805.1.S1_at   | Avr9/Cf-9 rapidly elicited protein 31                        | 18.45 |
| Mtr.34728.1.S1_at   | Hypothetical protein                                         | 18.37 |
| Mtr.8851.1.S1_at    | Clt1                                                         | 18.32 |
| Mtr.38612.1.S1_at   | Phe ammonia lyase                                            | 18.30 |
| Mtr.41944.1.S1_at   | Hypothetical protein                                         | 18.28 |
| Mtr.1343.1.S1_at    | Hypothetical protein                                         | 18.22 |
| Mtr.12866.1.S1_at   | Hypothetical protein                                         | 18.22 |
| Mtr.43644.1.S1_at   | Homeodomain transcription factor                             | 18.22 |



|                     |                                                     |       |
|---------------------|-----------------------------------------------------|-------|
| Mtr.39677.1.S1_at   | Immunoglobulin heavy chain variable region          | 18.17 |
| Mtr.33150.1.S1_s_at | Syringolide-induced protein 19-1-5                  | 18.12 |
| Mtr.38181.1.S1_at   | Expansin-like protein B                             | 18.09 |
| Mtr.12764.1.S1_at   | AMP-binding protein                                 | 18.02 |
| Mtr.38957.1.S1_at   | Hypothetical protein                                | 18.02 |
| Mtr.16848.1.S1_at   | Harpin-induced 1                                    | 17.95 |
| Mtr.19367.1.S1_at   | Zn-finger, C2H2 type                                | 17.94 |
| Mtr.12980.1.S1_at   | Hypothetical protein                                | 17.89 |
| Mtr.41031.1.S1_at   | 4-coumarate-CoA ligase                              | 17.81 |
| Mtr.48791.1.S1_at   | Cys-rich domain protein                             | 17.77 |
| Msa.3124.1.S1_at    | Hypothetical protein                                | 17.73 |
| Mtr.37204.1.S1_at   | Glutathione S-transferase GST 18                    | 17.66 |
| Mtr.38233.1.S1_at   | DAZ-associated protein 1                            | 17.66 |
| Mtr.35763.1.S1_at   | Hypothetical protein                                | 17.60 |
| Mtr.15180.1.S1_at   | Glucose-6-phosphate dehydrogenase                   | 17.58 |
| Mtr.38564.1.S1_at   | Nodulin-like protein                                | 17.56 |
| Mtr.10971.1.S1_s_at | Protein serine/threonine kinase                     | 17.53 |
| Mtr.38765.1.S1_at   | LOB domain protein 38                               | 17.52 |
| Mtr.6352.1.S1_s_at  | Alternative oxidase 3                               | 17.51 |
| Mtr.1156.1.S1_at    | Rhcadhesin receptor precursor (Germin-like protein) | 17.49 |
| Mtr.33373.1.S1_at   | Hypothetical protein                                | 17.47 |
| Mtr.24422.1.S1_at   | Hypothetical protein                                | 17.42 |
| Mtr.41772.1.S1_at   | AMP-binding protein                                 | 17.42 |
| Mtr.8531.1.S1_at    | Chalcone isomerase 1                                | 17.40 |
| Mtr.52169.1.S1_at   | Hypothetical protein                                | 17.31 |
| Mtr.3060.1.S1_s_at  | Hypothetical protein                                | 17.26 |
| Mtr.42703.1.S1_at   | Hypothetical protein                                | 17.25 |
| Mtr.10696.1.S1_at   | Syntaxin-related protein                            | 17.21 |
| Mtr.37736.1.S1_at   | Hypothetical protein                                | 17.21 |
| Mtr.24896.1.S1_at   | Hypothetical protein                                | 17.20 |
| Msa.1404.1.S1_at    | Hypothetical protein                                | 17.19 |
| Mtr.40613.1.S1_at   | Hypothetical protein                                | 17.15 |
| Mtr.39195.1.S1_at   | Nitrate transporter NTL1                            | 17.07 |
| Mtr.8667.1.S1_at    | Hypothetical protein                                | 17.06 |
| Mtr.51997.1.S1_at   | Hypothetical protein                                | 17.00 |
| Mtr.49418.1.S1_s_at | Hypothetical protein                                | 17.00 |
| Mtr.11285.1.S1_at   | WAK-like kinase                                     | 16.96 |
| Mtr.13171.1.S1_at   | Hypothetical protein                                | 16.92 |
| Mtr.45010.1.S1_at   | Serine/threonine kinase                             | 16.89 |
| Mtr.43252.1.S1_s_at | Avr9/Cf-9 rapidly elicited protein 74               | 16.87 |
| Mtr.37708.1.S1_at   | Sulfate transporter-like protein                    | 16.84 |
| Mtr.6769.1.S1_s_at  | Hypothetical protein                                | 16.82 |
| Msa.1879.1.S1_at    | Hypothetical protein                                | 16.82 |
| Mtr.43115.1.S1_at   | Pheromone receptor-like protein                     | 16.81 |
| Mtr.6373.1.S1_at    | Acetyl-CoA carboxylase                              | 16.80 |
| Mtr.32279.1.S1_at   | SPF1 protein                                        | 16.79 |
| Mtr.28696.1.S1_at   | Hypothetical protein                                | 16.72 |
| Msa.2935.1.S1_at    | Hypothetical protein                                | 16.72 |
| Mtr.49862.1.S1_at   | Isoflavone-7-o-methyltransferase 9                  | 16.71 |
| Mtr.29368.1.S1_at   | Receptor-like protein kinase                        | 16.67 |
| Mtr.3602.1.S1_at    | Hypothetical protein                                | 16.65 |
| Mtr.43048.1.S1_at   | Early nodulin 12A                                   | 16.63 |
| Mtr.46130.1.S1_at   | Hypothetical protein                                | 16.63 |
| Mtr.20185.1.S1_at   | Naringenin-chalcone synthase                        | 16.60 |

|                     |                                                          |       |
|---------------------|----------------------------------------------------------|-------|
| Mtr.5817.1.S1_at    | Phospholipid-transporting ATPase 1                       | 16.49 |
| Mtr.39569.1.S1_at   | Hypothetical protein                                     | 16.48 |
| Mtr.40125.1.S1_at   | Peroxidase1B                                             | 16.44 |
| Msa.2506.1.S1_at    | Hypothetical protein                                     | 16.43 |
| Mtr.8538.1.S1_at    | Plant regulatory factor 7                                | 16.42 |
| Mtr.8599.1.S1_s_at  | Caffeic acid 3-O-methyltransferase 1                     | 16.38 |
| Mtr.45356.1.S1_at   | Glutamate dehydrogenase                                  | 16.30 |
| Msa.2701.1.S1_at    | Hypothetical protein                                     | 16.26 |
| Mtr.47086.1.S1_s_at | Glucan 1,3-beta-glucosidase                              | 16.13 |
| Mtr.28714.1.S1_at   | Chalcone synthase 3                                      | 16.11 |
| Mtr.44713.1.S1_at   | Amino acid transporter                                   | 16.11 |
| Mtr.43217.1.S1_at   | Hypothetical protein                                     | 16.03 |
| Mtr.19471.1.S1_at   | Hypothetical protein                                     | 16.01 |
| Mtr.24851.1.S1_at   | Hypothetical protein                                     | 15.98 |
| Mtr.33191.1.S1_at   | Hypothetical protein                                     | 15.98 |
| Mtr.5781.1.S1_at    | Hypothetical protein                                     | 15.87 |
| Mtr.6543.1.S1_at    | Hypothetical protein                                     | 15.70 |
| Mtr.26898.1.S1_at   | Hypothetical protein                                     | 15.66 |
| Mtr.12569.1.S1_at   | Hypothetical protein                                     | 15.63 |
| Mtr.38907.1.S1_at   | Alcohol dehydrogenase                                    | 15.61 |
| Mtr.38443.1.S1_at   | Hypothetical protein                                     | 15.59 |
| Mtr.32982.1.S1_at   | MutT-like protein                                        | 15.51 |
| Mtr.42620.1.S1_at   | Organic anion transporter                                | 15.51 |
| Mtr.1886.1.S1_at    | Hypothetical protein                                     | 15.51 |
| Mtr.8696.1.S1_at    | Zinc finger DNA-binding protein                          | 15.46 |
| Mtr.20185.1.S1_x_at | Naringenin-chalcone synthase                             | 15.41 |
| Mtr.32486.1.S1_at   | Strubbelig receptor family 1                             | 15.41 |
| Mtr.12950.1.S1_at   | Hypothetical protein                                     | 15.39 |
| Mtr.34762.1.S1_s_at | Hypothetical protein                                     | 15.35 |
| Mtr.40333.1.S1_x_at | Uclacyanin II precursor (Blue copper-binding protein II) | 15.34 |
| Mtr.6916.1.S1_s_at  | Hypothetical protein                                     | 15.32 |
| Mtr.11066.1.S1_at   | Hypothetical protein                                     | 15.32 |
| Mtr.9788.1.S1_at    | ACC synthase                                             | 15.31 |
| Mtr.12006.1.S1_at   | Bacterial-induced peroxidase                             | 15.28 |
| Mtr.38485.1.S1_at   | Hypothetical protein                                     | 15.26 |
| Mtr.25967.1.S1_at   | Hypothetical protein                                     | 15.25 |
| Mtr.52180.1.S1_at   | Zn-finger, C2H2 type                                     | 15.21 |
| Msa.2722.1.S1_at    | Hypothetical protein                                     | 15.18 |
| Mtr.11156.1.S1_at   | Leucine-rich repeat receptor-like protein kinase 1       | 15.15 |
| Mtr.17940.1.S1_at   | U box protein                                            | 15.07 |
| Mtr.49085.1.S1_at   | GCN5-related N-acetyltransferase                         | 15.07 |
| Mtr.45331.1.S1_at   | Hypothetical protein                                     | 15.02 |
| Msa.2755.1.S1_at    | Hypothetical protein                                     | 14.97 |
| Mtr.42663.1.S1_at   | Ferredoxin-dependent glutamate synthase                  | 14.96 |
| Mtr.45315.1.S1_at   | SPF1 protein                                             | 14.89 |
| Mtr.39065.1.S1_at   | Hypothetical protein                                     | 14.84 |
| Mtr.4724.1.S1_at    | Organic anion transporter                                | 14.83 |
| Mtr.6648.1.S1_s_at  | Xyloglucan endotransglycosylase                          | 14.74 |
| Mtr.12663.1.S1_s_at | Patatin-like protein 1                                   | 14.72 |
| Mtr.29494.1.S1_at   | Pectin methylesterase 9                                  | 14.71 |
| Mtr.31589.1.S1_at   | Arm repeat protein                                       | 14.70 |
| Mtr.37494.1.S1_at   | Phi-1 protein                                            | 14.68 |
| Mtr.45193.1.S1_at   | Hypothetical protein                                     | 14.60 |
| Mtr.39563.1.S1_at   | Hypothetical protein                                     | 14.51 |

|                     |                                                                        |       |
|---------------------|------------------------------------------------------------------------|-------|
| Mtr.14281.1.S1_at   | Hypothetical protein                                                   | 14.49 |
| Mtr.8831.1.S1_at    | Patatin-like protein 1                                                 | 14.46 |
| Mtr.11636.1.S1_at   | Dof zinc finger protein                                                | 14.46 |
| Mtr.8751.1.S1_at    | Hypothetical protein                                                   | 14.41 |
| Mtr.8975.1.S1_at    | Bifunctional lysine-ketoglutarate reductase/saccharopine dehydrogenase | 14.37 |
| Msa.1878.1.S1_at    | Hypothetical protein                                                   | 14.37 |
| Mtr.20079.1.S1_at   | Lipoxygenase                                                           | 14.36 |
| Mtr.43561.1.S1_s_at | Calcium/calmodulin-regulated receptor-like kinase                      | 14.36 |
| Mtr.51989.1.S1_s_at | Cyclic nucleotide-binding; K <sup>+</sup> channel                      | 14.33 |
| Mtr.9486.1.S1_at    | Zinc finger protein CONSTANS-LIKE 10                                   | 14.33 |
| Mtr.11713.1.S1_at   | BRASSINOSTEROID INSENSITIVE 1-associated receptor kinase 1 (BAK1)      | 14.29 |
| Mtr.32409.1.S1_at   | Galactokinase like protein                                             | 14.26 |
| Mtr.41563.1.S1_at   | Ring finger E3 ligase                                                  | 14.25 |
| Mtr.44776.1.S1_at   | Hypothetical protein                                                   | 14.21 |
| Mtr.37757.1.S1_at   | Anthranilate N-benzoyltransferase-like protein                         | 14.20 |
| Mtr.35927.1.S1_at   | Maturase K                                                             | 14.19 |
| Mtr.40555.1.S1_at   | Osmotin-like protein                                                   | 14.19 |
| Mtr.28554.1.S1_at   | Hypothetical protein                                                   | 14.13 |
| Mtr.40838.1.S1_at   | Electron transfer flavoprotein, alpha subunit                          | 14.12 |
| Msa.2738.1.S1_at    | Hypothetical protein                                                   | 14.11 |
| Mtr.31946.1.S1_at   | Hypothetical protein                                                   | 14.03 |
| Mtr.1356.1.S1_s_at  | Hypothetical protein                                                   | 14.00 |
| Mtr.37578.1.S1_at   | Hypothetical protein                                                   | 13.97 |
| Mtr.37520.1.S1_at   | Cinnamoyl CoA reductase                                                | 13.89 |
| Mtr.14686.1.S1_at   | Tetrapeptide transporter                                               | 13.78 |
| Mtr.653.1.S1_s_at   | Short-chain dehydrogenase/reductase family protein                     | 13.78 |
| Mtr.12139.1.S1_at   | WRKY transcription factor 29                                           | 13.72 |
| Mtr.11520.1.S1_s_at | Protein phosphatase 2C                                                 | 13.71 |
| Mtr.27950.1.S1_at   | Hypothetical protein                                                   | 13.69 |
| Mtr.10557.1.S1_at   | PDR-type ABC transporter 2                                             | 13.66 |
| Msa.1770.1.S1_at    | Hypothetical protein                                                   | 13.66 |
| Mtr.41282.1.S1_s_at | TMV response-related protein                                           | 13.62 |
| Mtr.17903.1.S1_at   | Hypothetical protein                                                   | 13.58 |
| Mtr.44519.1.S1_at   | Hypothetical protein                                                   | 13.57 |
| Mtr.5445.1.S1_at    | Hypothetical protein                                                   | 13.57 |
| Mtr.45912.1.S1_at   | Pathogenesis-related transcriptional factor, ERF                       | 13.53 |
| Mtr.33213.1.S1_at   | Hypothetical protein                                                   | 13.52 |
| Mtr.41861.1.S1_at   | Acetyl-CoA carboxylase                                                 | 13.44 |
| Mtr.6049.1.S1_s_at  | S-receptor kinase                                                      | 13.43 |
| Mtr.39298.1.S1_at   | Hypothetical protein                                                   | 13.39 |
| Mtr.11053.1.S1_at   | WRKY-type transcription factor                                         | 13.38 |
| Mtr.32790.1.S1_at   | Hypothetical protein                                                   | 13.34 |
| Mtr.8962.1.S1_at    | Hypothetical protein                                                   | 13.33 |
| Mtr.11256.1.S1_at   | Hypothetical protein                                                   | 13.32 |
| Mtr.27510.1.S1_at   | Blight resistance protein RGA1                                         | 13.25 |
| Mtr.1359.1.S1_at    | Hypothetical protein                                                   | 13.23 |
| Mtr.12246.1.S1_at   | MtN12 protein                                                          | 13.21 |
| Mtr.33334.1.S1_at   | Exo-1,3-beta-glucanase                                                 | 13.20 |
| Mtr.6156.1.S1_at    | Cytochrome oxidase subunit II                                          | 13.17 |
| Mtr.6909.1.S1_at    | Hypothetical protein                                                   | 13.16 |
| Msa.3019.1.S1_at    | Hypothetical protein                                                   | 13.16 |
| Mtr.1331.1.S1_s_at  | Hypothetical protein                                                   | 13.16 |
| Msa.2819.1.S1_at    | Hypothetical protein                                                   | 13.15 |
| Mtr.18113.1.S1_at   | Hypothetical protein                                                   | 13.11 |

|                     |                                                                        |       |
|---------------------|------------------------------------------------------------------------|-------|
| Mtr.38479.1.S1_at   | Hypothetical protein                                                   | 13.07 |
| Mtr.25964.1.S1_s_at | Hypothetical protein                                                   | 13.02 |
| Mtr.29505.1.S1_s_at | Hypothetical protein                                                   | 12.99 |
| Mtr.14016.1.S1_at   | Hypothetical protein                                                   | 12.98 |
| Mtr.29902.1.S1_at   | WRKY DNA-binding protein                                               | 12.98 |
| Mtr.44641.1.S1_at   | F-box family protein                                                   | 12.97 |
| Mtr.10683.1.S1_at   | DNA-binding proteim                                                    | 12.97 |
| Mtr.35697.1.S1_s_at | Hypothetical protein                                                   | 12.96 |
| Mtr.11572.1.S1_at   | Receptor-like protein kinase                                           | 12.88 |
| Mtr.9023.1.S1_s_at  | MYB transcription factor                                               | 12.86 |
| Mtr.43231.1.S1_s_at | Hypothetical protein                                                   | 12.84 |
| Mtr.22536.1.S1_at   | Hypothetical protein                                                   | 12.77 |
| Mtr.8948.1.S1_at    | Cytochrome P450 82A1                                                   | 12.76 |
| Mtr.35302.1.S1_at   | Galactokinase                                                          | 12.75 |
| Mtr.43392.1.S1_s_at | Cytochrome b                                                           | 12.73 |
| Mtr.38380.1.S1_at   | Nodulin-like protein                                                   | 12.70 |
| Mtr.48070.1.S1_at   | Hypothetical protein                                                   | 12.68 |
| Mtr.11022.1.S1_at   | RING zinc finger protein                                               | 12.65 |
| Mtr.40363.1.S1_at   | Fiber protein                                                          | 12.60 |
| Mtr.35178.1.S1_at   | Branched-chain alpha keto-acid dehydrogenase E1-alpha                  | 12.58 |
| Mtr.44445.1.S1_at   | Syringolide-induced protein B13-1-9                                    | 12.51 |
| Mtr.40983.1.S1_at   | Hypothetical protein                                                   | 12.49 |
| Mtr.28045.1.S1_at   | Hypothetical protein                                                   | 12.48 |
| Mtr.47086.1.S1_at   | Glucan 1,3-beta-glucosidase                                            | 12.48 |
| Mtr.47087.1.S1_at   | Glucan 1,3-beta-glucosidase                                            | 12.47 |
| Mtr.43734.1.S1_at   | Protein kinase C                                                       | 12.45 |
| Mtr.13850.1.S1_at   | Hypothetical protein                                                   | 12.42 |
| Mtr.20425.1.S1_at   | Hypothetical protein                                                   | 12.41 |
| Mtr.13536.1.S1_at   | Bifunctional lysine-ketoglutarate reductase/saccharopine dehydrogenase | 12.38 |
| Mtr.12477.1.S1_at   | Quinone-oxidoreductase QR1                                             | 12.38 |
| Mtr.50729.1.S1_at   | Hypothetical protein                                                   | 12.35 |
| Mtr.39945.1.S1_at   | Hypothetical protein                                                   | 12.32 |
| Mtr.46166.1.S1_at   | Isopenicillin N synthase                                               | 12.27 |
| Mtr.8688.1.S1_at    | Hypothetical protein                                                   | 12.27 |
| Mtr.39874.1.S1_at   | Hypothetical protein                                                   | 12.19 |
| Mtr.13270.1.S1_at   | Hypothetical protein                                                   | 12.19 |
| Mtr.33024.1.S1_at   | Glucosidase-like protein                                               | 12.18 |
| Mtr.43987.1.S1_at   | Serin carboxypeptidase                                                 | 12.17 |
| Mtr.6950.1.S1_at    | Galactokinase like protein                                             | 12.16 |
| Mtr.43716.1.S1_at   | Glycosyltransferase                                                    | 12.14 |
| Mtr.20187.1.S1_x_at | Naringenin-chalcone synthase                                           | 12.12 |
| Mtr.32790.1.S1_s_at | Hypothetical protein                                                   | 12.12 |
| Mtr.41894.1.S1_at   | AT-hook DNA-binding protein                                            | 12.12 |
| Mtr.11466.1.S1_at   | Galactokinase like protein                                             | 12.09 |
| Mtr.42141.1.S1_s_at | Class III peroxidase                                                   | 12.09 |
| Mtr.8599.1.S1_at    | Caffeic acid 3-O-methyltransferase 1                                   | 12.08 |
| Mtr.35.1.S1_at      | Abscisic acid and environmental stress inducible protein               | 12.08 |
| Mtr.26939.1.S1_at   | Hypothetical protein                                                   | 12.07 |
| Mtr.1757.1.S1_at    | Homeodomain-leucine zipper protein                                     | 12.07 |
| Mtr.27096.1.S1_at   | Cinnamyl-alcohol dehydrogenase-like protein                            | 12.06 |
| Mtr.9450.1.S1_at    | Axi 1-like protein                                                     | 12.02 |
| Mtr.2465.1.S1_at    | Hypothetical protein                                                   | 12.02 |
| Mtr.39450.1.S1_at   | Amino acid permease AAP3                                               | 12.02 |
| Mtr.10743.1.S1_at   | SRG1 protein                                                           | 11.96 |

|                     |                                                  |       |
|---------------------|--------------------------------------------------|-------|
| Mtr.40830.1.S1_at   | 2-hydroxyphytanoyl-CoA lyase                     | 11.95 |
| Mtr.43229.1.S1_at   | Syringolide-induced protein 14-1-1               | 11.95 |
| Mtr.8522.1.S1_at    | Syringolide-induced protein 19-1-5               | 11.93 |
| Mtr.10043.1.S1_at   | Wax synthase                                     | 11.92 |
| Mtr.19134.1.S1_at   | Hypothetical protein                             | 11.86 |
| Mtr.14773.1.S1_at   | Hypothetical protein                             | 11.85 |
| Mtr.12155.1.S1_at   | WRKY-type DNA binding protein                    | 11.85 |
| Mtr.39431.1.S1_at   | Aldehyde reductase                               | 11.84 |
| Msa.2171.1.S1_at    | Hypothetical protein                             | 11.81 |
| Mtr.20144.1.S1_at   | Multi antimicrobial extrusion protein            | 11.77 |
| Mtr.12832.1.S1_at   | Receptor-like serine/threonine kinase            | 11.76 |
| Mtr.5684.1.S1_at    | Hypothetical protein                             | 11.74 |
| Mtr.36186.1.S1_at   | Nitrate transporter NTL1                         | 11.74 |
| Mtr.35243.1.S1_at   | Early flowering 3                                | 11.74 |
| Mtr.44775.1.S1_at   | G-protein alpha-subunit                          | 11.74 |
| Mtr.9524.1.S1_at    | Early flowering 3                                | 11.73 |
| Mtr.25953.1.S1_at   | Cytidine deaminase                               | 11.66 |
| Msa.2910.1.S1_at    | Hypothetical protein                             | 11.65 |
| Mtr.6341.1.S1_at    | Beta-1, 3-glucanase                              | 11.64 |
| Mtr.23311.1.S1_s_at | Glycosyl hydrolase family 3                      | 11.63 |
| Mtr.12456.1.S1_at   | AP2-related transcription factor                 | 11.61 |
| Mtr.42141.1.S1_at   | Class III peroxidase                             | 11.61 |
| Mtr.38492.1.S1_at   | Hypothetical protein                             | 11.55 |
| Mtr.12044.1.S1_at   | Cellulose synthase                               | 11.51 |
| Mtr.8934.1.S1_at    | Alternative oxidase 3                            | 11.50 |
| Mtr.17288.1.S1_at   | Natural resistance-associated macrophage protein | 11.50 |
| Mtr.11066.1.S1_s_at | Hypothetical protein                             | 11.49 |
| Mtr.28274.1.S1_at   | Avr9/Cf-9 rapidly elicited protein 264           | 11.46 |
| Mtr.44735.1.S1_at   | Hypothetical protein                             | 11.46 |
| Mtr.40168.1.S1_at   | Phenylalanine ammonia-lyase 2                    | 11.38 |
| Mtr.37413.1.S1_s_at | Chalcone-flavonone isomerase                     | 11.31 |
| Mtr.7214.1.S1_at    | Hypothetical protein                             | 11.24 |
| Mtr.44074.1.S1_at   | Strubbelig receptor family 1                     | 11.20 |
| Mtr.28687.1.S1_at   | Wax synthase                                     | 11.17 |
| Mtr.27221.1.S1_at   | Hypothetical protein                             | 11.17 |
| Mtr.45211.1.S1_at   | Phosphoenolpyruvate carboxykinase                | 11.14 |
| Mtr.10815.1.S1_at   | Hypothetical protein                             | 11.12 |
| Mtr.10370.1.S1_at   | Peroxidase1B                                     | 11.12 |
| Mtr.20391.1.S1_at   | Hypothetical protein                             | 11.09 |
| Mtr.45320.1.S1_at   | Hypothetical protein                             | 11.07 |
| Mtr.21324.1.S1_at   | ABC transporter                                  | 11.06 |
| Mtr.25509.1.S1_at   | Hypothetical protein                             | 11.00 |
| Mtr.43497.1.S1_at   | Ethylene-forming-enzyme-like dioxygenase         | 11.00 |
| Mtr.4464.1.S1_at    | Thaumatococcus-like protein 1                    | 11.00 |
| Mtr.38075.1.S1_at   | Hypothetical protein                             | 10.97 |
| Mtr.35852.1.S1_at   | Auxin-induced protein                            | 10.96 |
| Msa.2921.1.S1_at    | Hypothetical protein                             | 10.89 |
| Mtr.51734.1.S1_at   | Hypothetical protein                             | 10.88 |
| Mtr.25838.1.S1_at   | Hypothetical protein                             | 10.88 |
| Mtr.42860.1.S1_at   | Ferredoxin III                                   | 10.85 |
| Mtr.11866.1.S1_at   | MFS Superfamily transporter                      | 10.82 |
| Mtr.49572.1.S1_s_at | Naringenin-chalcone synthase                     | 10.79 |
| Mtr.32646.1.S1_at   | Hypothetical protein                             | 10.79 |
| Mtr.20623.1.S1_at   | Hypothetical protein                             | 10.75 |

|                     |                                        |       |
|---------------------|----------------------------------------|-------|
| Mtr.9901.1.S1_at    | Receptor-like kinase                   | 10.75 |
| Mtr.27985.1.S1_at   | Hypothetical protein                   | 10.72 |
| Mtr.11468.1.S1_at   | Hypothetical protein                   | 10.71 |
| Mtr.34990.1.S1_at   | Cytochrome P450                        | 10.70 |
| Mtr.15568.1.S1_s_at | DNA-binding WRKY                       | 10.69 |
| Mtr.16487.1.S1_s_at | Zn-finger, CCHC type                   | 10.66 |
| Mtr.11991.1.S1_s_at | Strubbelig receptor family 3           | 10.64 |
| Mtr.6317.1.S1_at    | Hypothetical protein                   | 10.63 |
| Mtr.9637.1.S1_at    | Myb-related transcription factor       | 10.63 |
| Mtr.37715.1.S1_at   | Hypothetical protein                   | 10.63 |
| Mtr.44104.1.S1_at   | Zeatin O-glucosyltransferase           | 10.62 |
| Mtr.9997.1.S1_at    | Glucan endo-1,3-beta-glucosidase       | 10.60 |
| Msa.2884.1.S1_at    | Hypothetical protein                   | 10.58 |
| Mtr.40521.1.S1_at   | Adhesive/proline-rich protein          | 10.53 |
| Mtr.40917.1.S1_at   | SPF1 protein                           | 10.52 |
| Mtr.11621.1.S1_at   | Receptor-like protein kinase           | 10.51 |
| Mtr.21790.1.S1_at   | Hypothetical protein                   | 10.49 |
| Mtr.43230.1.S1_at   | Hypothetical protein                   | 10.48 |
| Mtr.17239.1.S1_at   | Metallopeptidases                      | 10.48 |
| Mtr.17180.1.S1_at   | Galactose mutarotase                   | 10.45 |
| Mtr.19019.1.S1_at   | No apical meristem (NAM) protein       | 10.44 |
| Mtr.16851.1.S1_at   | Serine/threonine protein kinase        | 10.43 |
| Mtr.4899.1.S1_at    | Hypothetical protein                   | 10.37 |
| Mtr.12087.1.S1_at   | Hypothetical protein                   | 10.36 |
| Mtr.21276.1.S1_at   | TAZ finger                             | 10.34 |
| Mtr.33365.1.S1_s_at | PDR7 ABC transporter                   | 10.33 |
| Mtr.45159.1.S1_at   | Hypothetical protein                   | 10.32 |
| Mtr.38607.1.S1_at   | Hypothetical protein                   | 10.31 |
| Mtr.32738.1.S1_s_at | Myo-inositol oxygenase                 | 10.31 |
| Mtr.35538.1.S1_at   | Avr9/Cf-9 rapidly elicited protein 137 | 10.30 |
| Mtr.13757.1.S1_at   | Hin1-like protein                      | 10.29 |
| Mtr.37714.1.S1_at   | Syringolide-induced protein 13-1-1     | 10.28 |
| Mtr.2157.1.S1_s_at  | Hypothetical protein                   | 10.28 |
| Mtr.43746.1.S1_at   | Hypothetical protein                   | 10.24 |
| Mtr.31.1.S1_at      | Peroxidase 3                           | 10.22 |
| Mtr.6811.1.S1_at    | Glutathione S-transferase GST 17       | 10.20 |
| Mtr.34018.1.S1_at   | S-receptor kinase                      | 10.20 |
| Mtr.37718.1.S1_at   | Hypothetical protein                   | 10.18 |
| Mtr.51734.1.S1_s_at | Hypothetical protein                   | 10.17 |
| Mtr.35110.1.S1_at   | Hypothetical protein                   | 10.16 |
| Mtr.23266.1.S1_at   | Protease inhibitor                     | 10.15 |
| Mtr.45444.1.S1_at   | Hypothetical protein                   | 10.14 |
| Mtr.40123.1.S1_at   | Chalcone synthase 4                    | 10.14 |
| Mtr.44228.1.S1_at   | Cyanophycinase                         | 10.14 |
| Mtr.10575.1.S1_at   | Hypothetical protein                   | 10.12 |
| Mtr.35357.1.S1_at   | Auxin-regulated gene                   | 10.10 |
| Mtr.8853.1.S1_at    | Arginase 1                             | 10.09 |
| Mtr.8763.1.S1_at    | Thaumatococcus-like protein PR-5a      | 10.06 |
| Mtr.45244.1.S1_at   | Hypothetical protein                   | 10.06 |
| Mtr.45989.1.S1_at   | Xylose isomerase                       | 10.05 |
| Mtr.49688.1.S1_at   | Heavy metal-associated domain protein  | 10.05 |
| Mtr.12291.1.S1_s_at | Proline dehydrogenase                  | 10.04 |
| Mtr.37975.1.S1_at   | CBL-interacting protein kinase         | 10.01 |
| Mtr.42263.1.S1_at   | Hypothetical protein                   | 9.98  |



|                     |                                                         |      |
|---------------------|---------------------------------------------------------|------|
| Mtr.50458.1.S1_at   | Hypothetical protein                                    | 9.98 |
| Mtr.32564.1.S1_at   | Hypothetical protein                                    | 9.97 |
| Mtr.15309.1.S1_at   | Hypothetical protein                                    | 9.91 |
| Mtr.45080.1.S1_at   | Retinoic acid receptor alpha                            | 9.91 |
| Msa.1625.1.S1_at    | Hypothetical protein                                    | 9.91 |
| Mtr.10727.1.S1_at   | Hypothetical protein                                    | 9.89 |
| Msa.1669.1.S1_at    | Hypothetical protein                                    | 9.89 |
| Mtr.18222.1.S1_at   | Hypothetical protein                                    | 9.84 |
| Mtr.11811.1.S1_s_at | Phi-1-like protein                                      | 9.81 |
| Mtr.17531.1.S1_at   | Hypothetical protein                                    | 9.79 |
| Mtr.31118.1.S1_at   | Serine /threonine kinase                                | 9.79 |
| Mtr.10416.1.S1_at   | 3-deoxy-D-arabino-heptulosonate 7-phosphate synthase    | 9.79 |
| Mtr.38566.1.S1_at   | Hypothetical protein                                    | 9.78 |
| Mtr.48695.1.S1_at   | Hypothetical protein                                    | 9.78 |
| Mtr.39456.1.S1_at   | Coatomer protein complex, beta prime; beta'-COP protein | 9.77 |
| Mtr.41533.1.S1_at   | Calcium binding protein                                 | 9.76 |
| Mtr.13318.1.S1_at   | Hypothetical protein                                    | 9.76 |
| Mtr.40277.1.S1_x_at | Isoflavone synthase                                     | 9.73 |
| Mtr.32284.1.S1_at   | Hypothetical protein                                    | 9.73 |
| Mtr.18596.1.S1_at   | Zn-finger, RING                                         | 9.69 |
| Mtr.13960.1.S1_at   | Flavonoid 3'-hydroxylase                                | 9.69 |
| Mtr.44073.1.S1_at   | En/Spm-like transposon protein                          | 9.57 |
| Mtr.13722.1.S1_at   | Hypothetical protein                                    | 9.57 |
| Mtr.47442.1.S1_s_at | Glycosyl hydrolase family 3                             | 9.53 |
| Mtr.4083.1.S1_s_at  | Hypothetical protein                                    | 9.52 |
| Mtr.7255.1.S1_at    | Arm repeat protein                                      | 9.48 |
| Mtr.44658.1.S1_at   | Hypothetical protein                                    | 9.47 |
| Mtr.40277.1.S1_at   | Isoflavone synthase                                     | 9.47 |
| Msa.2861.1.S1_at    | Hypothetical protein                                    | 9.47 |
| Mtr.29335.1.S1_at   | Receptor-like protein kinase ARK                        | 9.47 |
| Mtr.40399.1.S1_at   | CPRD2 protein                                           | 9.46 |
| Mtr.20567.1.S1_at   | Naringenin-chalcone synthase                            | 9.45 |
| Mtr.35987.1.S1_s_at | Hypothetical protein                                    | 9.44 |
| Mtr.20618.1.S1_at   | Hypothetical protein                                    | 9.44 |
| Mtr.48831.1.S1_at   | Peptidase aspartic                                      | 9.42 |
| Mtr.7268.1.S1_at    | Hypothetical protein                                    | 9.41 |
| Msa.2680.1.S1_at    | Hypothetical protein                                    | 9.40 |
| Mtr.10121.1.S1_at   | Limonoid UDP-glucosyltransferase                        | 9.38 |
| Mtr.1746.1.S1_at    | Glucosyltransferase-9                                   | 9.36 |
| Mtr.8936.1.S1_at    | Zinc finger protein                                     | 9.36 |
| Mtr.37390.1.S1_at   | Pyruvate decarboxylase 1                                | 9.36 |
| Mtr.42202.1.S1_at   | Hypothetical protein                                    | 9.35 |
| Mtr.17497.1.S1_at   | bHLH DNA-binding                                        | 9.34 |
| Mtr.29510.1.S1_at   | Hypothetical protein                                    | 9.32 |
| Mtr.37879.1.S1_at   | Hypothetical protein                                    | 9.32 |
| Mtr.25476.1.S1_at   | Auxin efflux carrier protein family                     | 9.31 |
| Mtr.689.1.S1_at     | FAD-linked oxidoreductase                               | 9.31 |
| Mtr.22561.1.S1_at   | Hypothetical protein                                    | 9.31 |
| Mtr.43827.1.S1_at   | Hypothetical protein                                    | 9.30 |
| Mtr.5955.1.S1_at    | Hypothetical protein                                    | 9.25 |
| Mtr.52242.1.S1_at   | Galactokinase                                           | 9.25 |
| Mtr.49123.1.S1_at   | Major intrinsic protein                                 | 9.24 |
| Mtr.40194.1.S1_at   | Hypothetical protein                                    | 9.23 |
| Mtr.40223.1.S1_at   | Hypothetical protein                                    | 9.23 |

|                     |                                                   |      |
|---------------------|---------------------------------------------------|------|
| Mtr.41299.1.S1_s_at | Hypothetical protein                              | 9.22 |
| Mtr.3431.1.S1_at    | Hypothetical protein                              | 9.22 |
| Mtr.50225.1.S1_at   | Hypothetical protein                              | 9.22 |
| Mtr.25969.1.S1_at   | Hypothetical protein                              | 9.21 |
| Mtr.18322.1.S1_s_at | Alternative oxidase                               | 9.21 |
| Mtr.42916.1.S1_at   | Hypothetical protein                              | 9.20 |
| Mtr.49481.1.S1_at   | Hypothetical protein                              | 9.19 |
| Mtr.22708.1.S1_at   | Hypothetical protein                              | 9.18 |
| Mtr.24516.1.S1_at   | Basic blue copper protein                         | 9.17 |
| Mtr.5869.1.S1_at    | Hexose carrier protein HEX6                       | 9.17 |
| Mtr.12511.1.S1_at   | Heat shock factor RHSF2                           | 9.15 |
| Mtr.37878.1.S1_at   | Hypothetical protein                              | 9.14 |
| Mtr.28727.1.S1_at   | Adenosine monophosphate binding protein 1 AMPBP1  | 9.13 |
| Mtr.12303.1.S1_at   | Hypothetical protein                              | 9.13 |
| Mtr.49055.1.S1_s_at | Hypothetical protein                              | 9.11 |
| Mtr.24370.1.S1_at   | 3'-5' exonuclease                                 | 9.09 |
| Mtr.11712.1.S1_at   | NADH dehydrogenase subunit 6                      | 9.07 |
| Mtr.43783.1.S1_at   | Hypothetical protein                              | 9.06 |
| Mtr.9364.1.S1_at    | Hypothetical protein                              | 9.05 |
| Mtr.25365.1.S1_at   | Hypothetical protein                              | 9.05 |
| Mtr.31724.1.S1_at   | Hypothetical protein                              | 9.04 |
| Mtr.32367.1.S1_s_at | Peroxidase 3                                      | 9.01 |
| Mtr.12025.1.S1_at   | Bacterial-induced peroxidase                      | 9.01 |
| Mtr.11502.1.S1_at   | Hypothetical protein                              | 9.00 |
| Mtr.1625.1.S1_s_at  | Protein kinase                                    | 8.99 |
| Mtr.34118.1.S1_at   | Cationic peroxidase                               | 8.96 |
| Mtr.20187.1.S1_at   | Naringenin-chalcone synthase                      | 8.96 |
| Mtr.3072.1.S1_at    | Disease resistance protein Cf-2.1-like            | 8.96 |
| Mtr.12685.1.S1_at   | Calcium/calmodulin-regulated receptor-like kinase | 8.91 |
| Mtr.34771.1.S1_at   | Hypothetical protein                              | 8.87 |
| Mtr.44219.1.S1_at   | Cytokinin oxidase-like protein                    | 8.86 |
| Mtr.6339.1.S1_at    | Ripening regulated protein                        | 8.85 |
| Msa.1050.1.S1_at    | Hypothetical protein                              | 8.85 |
| Mtr.48873.1.S1_s_at | Plant acid phosphatase                            | 8.82 |
| Mtr.40166.1.S1_s_at | Phenylalanine ammonia-lyase                       | 8.81 |
| Mtr.10492.1.S1_x_at | Isoflavone synthase                               | 8.80 |
| Mtr.44094.1.S1_at   | Hypothetical protein                              | 8.78 |
| Mtr.44967.1.S1_at   | Hypothetical protein                              | 8.78 |
| Mtr.48304.1.S1_s_at | Hypothetical protein                              | 8.75 |
| Mtr.16822.1.S1_at   | Hypothetical protein                              | 8.74 |
| Mtr.10817.1.S1_at   | Hypothetical protein                              | 8.73 |
| Mtr.31312.1.S1_at   | Receptor ser/thr protein kinase                   | 8.73 |
| Mtr.41039.1.S1_at   | Hypothetical protein                              | 8.72 |
| Msa.952.1.S1_at     | Hypothetical protein                              | 8.71 |
| Mtr.38202.1.S1_at   | WRKY transcription factor 28                      | 8.70 |
| Mtr.12538.1.S1_at   | Hypothetical protein                              | 8.69 |
| Mtr.40371.1.S1_at   | Avr9/Cf-9 rapidly elicited protein 264            | 8.69 |
| Mtr.42135.1.S1_at   | Photoperiod responsive protein                    | 8.65 |
| Mtr.7906.1.S1_at    | Vasopressin V1b receptor                          | 8.65 |
| Mtr.19182.1.S1_at   | Hypothetical protein                              | 8.64 |
| Mtr.5738.1.S1_s_at  | Hypothetical protein                              | 8.64 |
| Mtr.39665.1.S1_at   | Hypothetical protein                              | 8.63 |
| Mtr.4576.1.S1_s_at  | Indole-3-acetate beta-glucosyltransferase         | 8.62 |
| Mtr.28033.1.S1_at   | Hypothetical protein                              | 8.62 |

|                     |                                                          |      |
|---------------------|----------------------------------------------------------|------|
| Mtr.43944.1.S1_at   | Glucan 1,3-beta-glucosidase                              | 8.62 |
| Mtr.41518.1.S1_at   | Hypothetical protein                                     | 8.61 |
| Mtr.28177.1.S1_at   | Hypothetical protein                                     | 8.61 |
| Mtr.38328.1.S1_at   | Phosphatidic acid phosphatase alpha                      | 8.59 |
| Mtr.45000.1.S1_at   | Trehalose-6-phosphate synthase/phosphatase               | 8.59 |
| Mtr.29535.1.S1_x_at | Hypothetical protein                                     | 8.57 |
| Mtr.49053.1.S1_s_at | Hypothetical protein                                     | 8.55 |
| Mtr.12051.1.S1_at   | Hypothetical protein                                     | 8.53 |
| Mtr.34126.1.S1_at   | Hypothetical protein                                     | 8.52 |
| Mtr.12377.1.S1_at   | WRKY transcription factor 11                             | 8.49 |
| Mtr.15380.1.S1_at   | Hypothetical protein                                     | 8.49 |
| Mtr.41367.1.S1_at   | Hypothetical protein                                     | 8.48 |
| Mtr.6933.1.S1_at    | Methylcrotonyl-CoA carboxylase beta chain                | 8.48 |
| Mtr.37262.1.S1_at   | Hypothetical protein                                     | 8.47 |
| Mtr.45741.1.S1_at   | Cytochrome P450                                          | 8.47 |
| Mtr.12708.1.S1_at   | Isoflavone reductase                                     | 8.46 |
| Mtr.6889.1.S1_at    | Hypothetical protein                                     | 8.45 |
| Mtr.30703.1.S1_at   | Hypothetical protein                                     | 8.42 |
| Mtr.35080.1.S1_at   | Trehalose-6-phosphate synthase                           | 8.39 |
| Mtr.11349.1.S1_at   | Transcription factor WRKY31                              | 8.39 |
| Mtr.23988.1.S1_at   | bHLH protein                                             | 8.39 |
| Mtr.41551.1.S1_at   | SCARECROW-like protein                                   | 8.38 |
| Mtr.39741.1.S1_s_at | Hypothetical protein                                     | 8.37 |
| Msa.1166.1.S1_at    | Hypothetical protein                                     | 8.37 |
| Mtr.48109.1.S1_at   | WRKY4 transcription factor                               | 8.35 |
| Mtr.13586.1.S1_at   | Transcription activator                                  | 8.34 |
| Mtr.33124.1.S1_at   | Acyl-activating enzyme                                   | 8.33 |
| Mtr.35410.1.S1_at   | Rho GDP dissociation inhibitor 2                         | 8.33 |
| Msa.1898.1.S1_at    | Hypothetical protein                                     | 8.33 |
| Mtr.37899.1.S1_at   | Hypothetical protein                                     | 8.32 |
| Mtr.24820.1.S1_s_at | Fructan 1-exohydrolase                                   | 8.32 |
| Mtr.49557.1.S1_at   | Hypothetical protein                                     | 8.31 |
| Mtr.4233.1.S1_at    | Hypothetical protein                                     | 8.30 |
| Mtr.16688.1.S1_at   | Mitochondrial import inner membrane translocase          | 8.30 |
| Mtr.51693.1.S1_at   | Hypothetical protein                                     | 8.30 |
| Mtr.43956.1.S1_at   | Zinc finger family protein                               | 8.28 |
| Mtr.40410.1.S1_at   | Hypothetical protein                                     | 8.25 |
| Mtr.43494.1.S1_at   | Hypothetical protein                                     | 8.25 |
| Mtr.17422.1.S1_at   | Amino acid/polyamine transporter I                       | 8.24 |
| Mtr.19625.1.S1_at   | Hypothetical protein                                     | 8.24 |
| Mtr.16539.1.S1_s_at | Hypothetical protein                                     | 8.24 |
| Mtr.48475.1.S1_at   | Hypothetical protein                                     | 8.23 |
| Mtr.11488.1.S1_at   | Hypothetical protein                                     | 8.22 |
| Mtr.22179.1.S1_at   | Hypothetical protein                                     | 8.22 |
| Mtr.18819.1.S1_at   | 2OG-Fe(II) oxygenase                                     | 8.21 |
| Mtr.29408.1.S1_at   | Hypothetical protein                                     | 8.20 |
| Mtr.42235.1.S1_at   | Beta-glucan binding protein                              | 8.20 |
| Mtr.13918.1.S1_at   | Hypothetical protein                                     | 8.20 |
| Msa.3160.1.S1_at    | Hypothetical protein                                     | 8.16 |
| Mtr.10005.1.S1_at   | Hypothetical protein                                     | 8.16 |
| Mtr.39423.1.S1_at   | Hypothetical protein                                     | 8.14 |
| Mtr.12648.1.S1_at   | Ovary protein induced by treatment with gibberellic acid | 8.13 |
| Mtr.696.1.S1_at     | Auxin-induced (indole-3-acetic acid induced) protein     | 8.13 |
| Mtr.28786.1.S1_at   | Dihydrodipicolinate synthase                             | 8.12 |

|                     |                                                   |      |
|---------------------|---------------------------------------------------|------|
| Mtr.22904.1.S1_s_at | Aux/IAA protein                                   | 8.11 |
| Mtr.820.1.S1_at     | Hypothetical protein                              | 8.11 |
| Mtr.13641.1.S1_at   | Alpha-mannosidase                                 | 8.08 |
| Mtr.8813.1.S1_at    | Zinc finger protein constans-like 6               | 8.07 |
| Mtr.39825.1.S1_at   | NADH dehydrogenase, subunit 2                     | 8.07 |
| Msa.1267.1.S1_at    | Hypothetical protein                              | 8.05 |
| Mtr.32917.1.S1_s_at | Cytochrome oxidase subunit I                      | 8.04 |
| Mtr.13455.1.S1_at   | Hypothetical protein                              | 8.03 |
| Msa.1067.1.S1_at    | Hypothetical protein                              | 8.02 |
| Mtr.10984.1.S1_at   | Hypothetical protein                              | 8.00 |
| Mtr.44194.1.S1_at   | CPRD2 protein                                     | 8.00 |
| Mtr.3183.1.S1_at    | Hypothetical protein                              | 7.99 |
| Mtr.10808.1.S1_at   | Prephenate dehydratase                            | 7.98 |
| Mtr.29714.1.S1_at   | Hypothetical protein                              | 7.96 |
| Mtr.4083.1.S1_at    | Hypothetical protein                              | 7.95 |
| Mtr.20588.1.S1_at   | Hypothetical protein                              | 7.95 |
| Mtr.33658.1.S1_at   | Hypothetical protein                              | 7.92 |
| Mtr.7741.1.S1_at    | Peptide/amino acid transporter                    | 7.91 |
| Mtr.12226.1.S1_at   | Hypothetical protein                              | 7.91 |
| Mtr.31572.1.S1_s_at | Inwardly rectifying potassium channel subunit     | 7.87 |
| Msa.2990.1.S1_at    | Hypothetical protein                              | 7.87 |
| Mtr.7638.1.S1_at    | Endo-1,3-beta-glucanase                           | 7.87 |
| Mtr.38799.1.S1_s_at | Cytokinin oxidase-like protein                    | 7.86 |
| Mtr.39999.1.S1_at   | Syringolide-induced protein B13-1-9               | 7.86 |
| Mtr.12419.1.S1_s_at | 50S ribosomal protein L15                         | 7.85 |
| Mtr.29535.1.S1_at   | Hypothetical protein                              | 7.85 |
| Mtr.36136.1.S1_at   | Hypothetical protein                              | 7.84 |
| Mtr.8617.1.S1_at    | Syringolide-induced protein B15-3-5               | 7.84 |
| Msa.2259.1.S1_at    | Hypothetical protein                              | 7.83 |
| Mtr.32799.1.S1_at   | GTP-binding regulatory protein extra-large        | 7.80 |
| Mtr.46485.1.S1_at   | Glutathione S-transferase GST 17                  | 7.78 |
| Mtr.46962.1.S1_at   | Hypothetical protein                              | 7.77 |
| Mtr.42039.1.S1_at   | Hypothetical protein                              | 7.77 |
| Mtr.21216.1.S1_at   | Exo70 exocyst complex subunit                     | 7.76 |
| Mtr.27309.1.S1_at   | Hypothetical protein                              | 7.74 |
| Mtr.6545.1.S1_at    | Hypothetical protein                              | 7.74 |
| Mtr.45877.1.S1_at   | RNA-binding region RNP-1                          | 7.72 |
| Mtr.41986.1.S1_at   | Wall-associated kinase 4                          | 7.71 |
| Mtr.43656.1.S1_at   | Cysteine protease                                 | 7.70 |
| Mtr.5512.1.S1_at    | Biotin synthase                                   | 7.69 |
| Mtr.41342.1.S1_at   | Serine/threonine-protein kinase                   | 7.67 |
| Mtr.19162.1.S1_at   | AMP-dependent synthetase and ligase               | 7.65 |
| Mtr.43887.1.S1_at   | Hypothetical protein                              | 7.65 |
| Mtr.45285.1.S1_at   | Hypothetical protein                              | 7.62 |
| Mtr.26378.1.S1_at   | Hypothetical protein                              | 7.62 |
| Mtr.20804.1.S1_at   | Protein kinase                                    | 7.61 |
| Mtr.35122.1.S1_at   | Hypothetical protein                              | 7.61 |
| Mtr.51571.1.S1_s_at | Amino acid/polyamine transporter II               | 7.60 |
| Mtr.18295.1.S1_at   | Zinc-containing alcohol dehydrogenase superfamily | 7.60 |
| Mtr.47077.1.S1_at   | Hypothetical protein                              | 7.60 |
| Msa.1103.1.S1_at    | Hypothetical protein                              | 7.59 |
| Mtr.49400.1.S1_at   | Auxin responsive SAUR protein                     | 7.58 |
| Mtr.43041.1.S1_at   | Hexokinase                                        | 7.58 |
| Mtr.7638.1.S1_s_at  | Endo-1,3-beta-glucanase                           | 7.57 |

|                     |                                       |      |
|---------------------|---------------------------------------|------|
| Mtr.24739.1.S1_at   | Phosphoserine aminotransferase        | 7.55 |
| Mtr.51630.1.S1_s_at | Hypothetical protein                  | 7.54 |
| Mtr.27861.1.S1_at   | Hypothetical protein                  | 7.54 |
| Mtr.15772.1.S1_at   | Glycoside hydrolase                   | 7.52 |
| Mtr.16854.1.S1_x_at | Protein kinase                        | 7.51 |
| Mtr.41506.1.S1_at   | Hypothetical protein                  | 7.50 |
| Mtr.12277.1.S1_at   | Class 10 PR protein                   | 7.49 |
| Mtr.26988.1.S1_s_at | Hypothetical protein                  | 7.48 |
| Mtr.38185.1.S1_at   | Hypothetical protein                  | 7.46 |
| Msa.3062.1.S1_at    | Hypothetical protein                  | 7.45 |
| Mtr.52198.1.S1_at   | Bacterial regulatory factor           | 7.45 |
| Mtr.26988.1.S1_at   | Hypothetical protein                  | 7.45 |
| Mtr.43134.1.S1_at   | Fructose-bisphosphate aldolase        | 7.44 |
| Mtr.41386.1.S1_at   | Hypothetical protein                  | 7.44 |
| Mtr.40724.1.S1_at   | Hypothetical protein                  | 7.44 |
| Mtr.14303.1.S1_at   | Hydrogenase large subunit             | 7.44 |
| Mtr.27095.1.S1_at   | Hypothetical protein                  | 7.43 |
| Mtr.261.1.S1_at     | Hypothetical protein                  | 7.43 |
| Mtr.1797.1.S1_at    | MYB-related protein                   | 7.42 |
| Mtr.9577.1.S1_at    | Hypothetical protein                  | 7.40 |
| Mtr.49441.1.S1_at   | 2OG-Fe(II) oxygenase                  | 7.40 |
| Mtr.43353.1.S1_at   | Hypothetical protein                  | 7.37 |
| Mtr.38735.1.S1_at   | Hypothetical protein                  | 7.36 |
| Mtr.27097.1.S1_at   | Hypothetical protein                  | 7.35 |
| Mtr.35833.1.S1_s_at | Hypothetical protein                  | 7.35 |
| Mtr.13643.1.S1_at   | Hypothetical protein                  | 7.33 |
| Mtr.15997.1.S1_s_at | Peroxidase                            | 7.33 |
| Mtr.38092.1.S1_at   | MAP kinase phosphatase                | 7.33 |
| Mtr.45989.1.S1_s_at | Xylose isomerase                      | 7.32 |
| Mtr.5715.1.S1_at    | Beta-glucan-elicitor receptor         | 7.32 |
| Mtr.29666.1.S1_at   | Hypothetical protein                  | 7.29 |
| Mtr.37676.1.S1_at   | Hypothetical protein                  | 7.27 |
| Mtr.17556.1.S1_at   | Hypothetical protein                  | 7.24 |
| Mtr.33372.1.S1_at   | Hypothetical protein                  | 7.23 |
| Mtr.40048.1.S1_at   | Acetylornithine aminotransferase      | 7.23 |
| Mtr.39403.1.S1_at   | Receptor-like serine/threonine kinase | 7.23 |
| Mtr.17610.1.S1_at   | Hypothetical protein                  | 7.23 |
| Mtr.38022.1.S1_at   | LEXYL1 protein                        | 7.21 |
| Mtr.38520.1.S1_s_at | Hypothetical protein                  | 7.21 |
| Mtr.29342.1.S1_at   | Hypothetical protein                  | 7.20 |
| Mtr.39132.1.S1_at   | Malate synthase                       | 7.20 |
| Mtr.10407.1.S1_at   | Ferrochelatae II                      | 7.19 |
| Mtr.44996.1.S1_at   | Acid phosphatase                      | 7.19 |
| Mtr.27753.1.S1_at   | L-lactate dehydrogenase               | 7.18 |
| Mtr.42373.1.S1_at   | Peroxidase                            | 7.18 |
| Mtr.25889.1.S1_at   | Protein kinase                        | 7.18 |
| Mtr.1587.1.S1_at    | Calmodulin-related protein            | 7.17 |
| Mtr.31649.1.S1_at   | Hypothetical protein                  | 7.17 |
| Mtr.11087.1.S1_at   | Hypothetical protein                  | 7.17 |
| Mtr.40765.1.S1_at   | Hypothetical protein                  | 7.16 |
| Mtr.32735.1.S1_at   | Hypothetical protein                  | 7.15 |
| Mtr.12958.1.S1_at   | Hypothetical protein                  | 7.14 |
| Mtr.44130.1.S1_s_at | Hypothetical protein                  | 7.13 |
| Mtr.12290.1.S1_at   | Proline dehydrogenase                 | 7.13 |

|                     |                                               |      |
|---------------------|-----------------------------------------------|------|
| Mtr.48476.1.S1_at   | Hypothetical protein                          | 7.11 |
| Mtr.42598.1.S1_at   | Hypothetical protein                          | 7.10 |
| Mtr.43119.1.S1_at   | Chorismate synthase 1                         | 7.09 |
| Mtr.25887.1.S1_at   | bHLH protein                                  | 7.08 |
| Mtr.9756.1.S1_at    | Rev interacting-like protein                  | 7.05 |
| Mtr.51425.1.S1_at   | Serine/threonine protein kinase               | 7.04 |
| Mtr.10672.1.S1_s_at | Polyphosphoinositide binding protein          | 7.02 |
| Mtr.9421.1.S1_at    | Indole-3-acetate beta-glucosyltransferase     | 7.02 |
| Mtr.31952.1.S1_at   | Hypothetical protein                          | 7.01 |
| Mtr.20668.1.S1_at   | Hypothetical protein                          | 7.01 |
| Msa.1129.1.S1_at    | Hypothetical protein                          | 7.00 |
| Mtr.40611.1.S1_at   | Peroxidase                                    | 6.99 |
| Mtr.38347.1.S1_at   | Tripartite motif protein                      | 6.96 |
| Mtr.37560.1.S1_at   | Pyruvate decarboxylase                        | 6.96 |
| Mtr.1874.1.S1_s_at  | Phospholipid-transporting ATPase              | 6.96 |
| Mtr.12264.1.S1_s_at | Cytochrome P450 monooxygenase                 | 6.95 |
| Mtr.5174.1.S1_at    | Hypothetical protein                          | 6.94 |
| Mtr.33184.1.S1_at   | Hypothetical protein                          | 6.94 |
| Mtr.13083.1.S1_at   | Hypothetical protein                          | 6.93 |
| Mtr.5079.1.S1_at    | Syringolide-induced protein 1-3-1B            | 6.92 |
| Mtr.7063.1.S1_at    | Alcohol dehydrogenase                         | 6.90 |
| Mtr.24464.1.S1_at   | Receptor-like protein kinase                  | 6.89 |
| Mtr.42683.1.S1_at   | Acyl-activating enzyme                        | 6.89 |
| Mtr.15470.1.S1_s_at | Amino acid/polyamine transporter II           | 6.87 |
| Mtr.43391.1.S1_at   | Hypothetical protein                          | 6.87 |
| Mtr.32702.1.S1_at   | Hypothetical protein                          | 6.86 |
| Mtr.28496.1.S1_at   | Protein kinase                                | 6.85 |
| Mtr.42418.1.S1_at   | Phospholipase D                               | 6.85 |
| Mtr.28500.1.S1_at   | Outer surface protein C                       | 6.84 |
| Mtr.8880.1.S1_at    | B12D-like protein                             | 6.84 |
| Mtr.12423.1.S1_at   | Heat shock transcription factor               | 6.84 |
| Mtr.10681.1.S1_at   | Universal stress protein USPI-like protein    | 6.84 |
| Mtr.23311.1.S1_at   | Glycosyl hydrolase family                     | 6.84 |
| Mtr.23026.1.S1_at   | Hypothetical protein                          | 6.82 |
| Mtr.28717.1.S1_at   | Hypothetical protein                          | 6.81 |
| Msa.3099.1.S1_at    | Hypothetical protein                          | 6.81 |
| Mtr.38568.1.S1_at   | Kelch repeat-containing F-box                 | 6.79 |
| Mtr.42626.1.S1_at   | Hypothetical protein                          | 6.79 |
| Mtr.19224.1.S1_at   | bZIP transcription factor                     | 6.78 |
| Mtr.45266.1.S1_at   | Phospholipase D                               | 6.77 |
| Msa.1202.1.S1_at    | Hypothetical protein                          | 6.77 |
| Mtr.16850.1.S1_at   | Curculin-like (mannose-binding) lectin        | 6.76 |
| Mtr.46462.1.S1_at   | AMP-dependent synthetase and ligase family    | 6.74 |
| Mtr.6934.1.S1_at    | Glutaredoxin-related-like protein             | 6.73 |
| Msa.3172.1.S1_at    | Hypothetical protein                          | 6.72 |
| Mtr.49405.1.S1_s_at | Disease resistance protein                    | 6.72 |
| Mtr.37493.1.S1_at   | Phi-1 protein                                 | 6.71 |
| Mtr.51988.1.S1_at   | Pyridine nucleotide-disulphide oxidoreductase | 6.70 |
| Mtr.28526.1.S1_at   | Hypothetical protein                          | 6.70 |
| Mtr.44386.1.S1_at   | Hypothetical protein                          | 6.69 |
| Msa.1009.1.S1_at    | Hypothetical protein                          | 6.68 |
| Mtr.51717.1.S1_at   | Hypothetical protein                          | 6.68 |
| Mtr.17920.1.S1_s_at | Hypothetical protein                          | 6.68 |
| Mtr.17409.1.S1_s_at | Amino acid/polyamine transporter II           | 6.67 |



|                     |                                                         |      |
|---------------------|---------------------------------------------------------|------|
| Mtr.48996.1.S1_at   | Heat shock protein DnaJ                                 | 6.67 |
| Mtr.37873.1.S1_at   | Hypothetical protein                                    | 6.66 |
| Mtr.40256.1.S1_at   | Hypothetical protein                                    | 6.66 |
| Mtr.7637.1.S1_at    | Prostatic spermine-binding protein precursor (SBP)      | 6.66 |
| Mtr.43184.1.S1_at   | Hypothetical protein                                    | 6.65 |
| Mtr.40073.1.S1_at   | Hypothetical protein                                    | 6.65 |
| Mtr.46961.1.S1_at   | Hypothetical protein                                    | 6.65 |
| Mtr.10636.1.S1_at   | MYB protein                                             | 6.65 |
| Mtr.3151.1.S1_s_at  | Hypothetical protein                                    | 6.65 |
| Mtr.17506.1.S1_at   | Phospholipid-translocating P-type ATPase                | 6.64 |
| Mtr.10928.1.S1_s_at | Avr9/Cf-9 rapidly elicited protein                      | 6.64 |
| Mtr.43605.1.S1_at   | Glycosyl transferase                                    | 6.63 |
| Mtr.40680.1.S1_at   | Transcription factor MYB                                | 6.63 |
| Mtr.41783.1.S1_at   | Hypothetical protein                                    | 6.62 |
| Mtr.34448.1.S1_at   | UDP-glucose 4-epimerase                                 | 6.62 |
| Msa.1124.1.S1_at    | Hypothetical protein                                    | 6.61 |
| Mtr.8669.1.S1_at    | Hypothetical protein                                    | 6.61 |
| Mtr.44874.1.S1_at   | Hypothetical protein                                    | 6.61 |
| Mtr.40278.1.S1_at   | Glutathione S-transferase                               | 6.61 |
| Mtr.42299.1.S1_at   | Hypothetical protein                                    | 6.60 |
| Mtr.11544.1.S1_at   | Receptor-like kinase                                    | 6.59 |
| Mtr.7943.1.S1_at    | Hypothetical protein                                    | 6.58 |
| Mtr.4906.1.S1_s_at  | 1-aminocyclopropane-1-carboxylate oxidase (ACC oxidase) | 6.57 |
| Mtr.9897.1.S1_s_at  | Glycerol kinase                                         | 6.57 |
| Mtr.43924.1.S1_at   | Glutaredoxin-related-like protein                       | 6.57 |
| Mtr.34980.1.S1_s_at | Hypothetical protein                                    | 6.55 |
| Mtr.33595.1.S1_s_at | Root-specific metal transporter                         | 6.54 |
| Mtr.6892.1.S1_at    | S glycoprotein                                          | 6.54 |
| Mtr.5692.1.S1_at    | Indole-3-acetate beta-glucosyltransferase-like protein  | 6.53 |
| Mtr.19888.1.S1_at   | Glycosyl hydrolases family                              | 6.51 |
| Mtr.50994.1.S1_at   | Zn-finger, RING                                         | 6.50 |
| Mtr.46208.1.S1_at   | Hypothetical protein                                    | 6.48 |
| Mtr.10681.1.S1_s_at | Universal stress protein USP1-like protein              | 6.47 |
| Msa.1569.1.S1_at    | Hypothetical protein                                    | 6.46 |
| Mtr.37906.1.S1_at   | 4,5-DOPA dioxygenase extradiol-like protein             | 6.45 |
| Mtr.44872.1.S1_at   | Cytochrome P450 monooxygenase                           | 6.45 |
| Mtr.50290.1.S1_s_at | Hypothetical protein                                    | 6.44 |
| Mtr.42673.1.S1_at   | Receptor-like serine/threonine kinase                   | 6.44 |
| Mtr.32374.1.S1_at   | Serine carboxypeptidase                                 | 6.43 |
| Mtr.11516.1.S1_at   | Phosphoserine aminotransferase                          | 6.42 |
| Mtr.10063.1.S1_at   | Cycloidea protein                                       | 6.42 |
| Mtr.16854.1.S1_at   | Protein kinase                                          | 6.41 |
| Mtr.10165.1.S1_at   | Ethylene receptor                                       | 6.41 |
| Mtr.41182.1.S1_at   | GTP-binding protein                                     | 6.40 |
| Mtr.11783.1.S1_at   | Hypothetical protein                                    | 6.39 |
| Mtr.38735.1.S1_s_at | Hypothetical protein                                    | 6.39 |
| Mtr.39468.1.S1_at   | Hypothetical protein                                    | 6.39 |
| Mtr.5055.1.S1_at    | Hypothetical protein                                    | 6.39 |
| Mtr.28525.1.S1_at   | Hypothetical protein                                    | 6.38 |
| Msa.1670.1.S1_at    | Hypothetical protein                                    | 6.38 |
| Mtr.48899.1.S1_at   | Ferritin                                                | 6.37 |
| Mtr.22589.1.S1_at   | Hypothetical protein                                    | 6.36 |
| Mtr.43900.1.S1_at   | Hypothetical protein                                    | 6.35 |
| Mtr.33265.1.S1_at   | Hypothetical protein                                    | 6.35 |

|                     |                                            |      |
|---------------------|--------------------------------------------|------|
| Mtr.37224.1.S1_at   | Hydroxyproline-rich glycoprotein           | 6.35 |
| Mtr.38256.1.S1_s_at | Flavonol synthase                          | 6.35 |
| Mtr.12226.1.S1_x_at | Hypothetical protein                       | 6.35 |
| Mtr.32195.1.S1_at   | Urea active transporter                    | 6.34 |
| Msa.686.1.S1_at     | Hypothetical protein                       | 6.34 |
| Mtr.39267.1.S1_at   | 1-aminocyclopropane-1-carboxylate synthase | 6.34 |
| Mtr.38662.1.S1_at   | Hypothetical protein                       | 6.33 |
| Mtr.38932.1.S1_at   | Malate synthase                            | 6.33 |
| Mtr.24465.1.S1_at   | Putative receptor-like protein kinase      | 6.33 |
| Mtr.35704.1.S1_at   | Hypothetical protein                       | 6.33 |
| Mtr.29300.1.S1_x_at | Hypothetical protein                       | 6.31 |
| Mtr.11587.1.S1_at   | Hypothetical protein                       | 6.30 |
| Mtr.15028.1.S1_at   | Transketolase                              | 6.30 |
| Mtr.41419.1.S1_at   | Ring domain containing protein             | 6.30 |
| Mtr.10090.1.S1_at   | Homo-phytochelatin synthase                | 6.29 |
| Mtr.33446.1.S1_at   | Sucrose transporter                        | 6.28 |
| Mtr.42915.1.S1_at   | Hypothetical protein                       | 6.27 |
| Mtr.35009.1.S1_at   | Hypothetical protein                       | 6.26 |
| Mtr.41255.1.S1_at   | Amino acid permease                        | 6.25 |
| Mtr.41855.1.S1_at   | Hypothetical protein                       | 6.25 |
| Mtr.49771.1.S1_at   | Hypothetical protein                       | 6.25 |
| Mtr.19206.1.S1_at   | Ras GTPase                                 | 6.25 |
| Mtr.1874.1.S1_at    | Potential phospholipid-transporting ATPase | 6.24 |
| Mtr.9079.1.S1_at    | Hypothetical protein                       | 6.24 |
| Mtr.24434.1.S1_at   | Hypothetical protein                       | 6.24 |
| Mtr.42185.1.S1_at   | Hypothetical protein                       | 6.24 |
| Mtr.12290.1.S1_s_at | Proline dehydrogenase                      | 6.23 |
| Mtr.22675.1.S1_at   | Hypothetical protein                       | 6.20 |
| Mtr.10956.1.S1_at   | Hypothetical protein                       | 6.20 |
| Mtr.32397.1.S1_s_at | Lipid phosphate phosphatase                | 6.19 |
| Mtr.42770.1.S1_at   | Photosystem II 23 kDa polypeptide          | 6.19 |
| Mtr.25575.1.S1_at   | Hypothetical protein                       | 6.19 |
| Mtr.44823.1.S1_at   | Hypothetical protein                       | 6.19 |
| Mtr.37646.1.S1_s_at | Hypothetical protein                       | 6.18 |
| Mtr.6875.1.S1_at    | Hypothetical protein                       | 6.17 |
| Mtr.29374.1.S1_at   | Hypothetical protein                       | 6.17 |
| Mtr.43023.1.S1_at   | Hypothetical protein                       | 6.17 |
| Mtr.27726.1.S1_at   | Rod shape-determining protein              | 6.17 |
| Mtr.8653.1.S1_at    | Peroxidase                                 | 6.16 |
| Mtr.14785.1.S1_at   | Hypothetical protein                       | 6.16 |
| Msa.2848.1.S1_at    | Hypothetical protein                       | 6.16 |
| Mtr.33562.1.S1_at   | Hypothetical protein                       | 6.15 |
| Mtr.684.1.S1_at     | Hypothetical protein                       | 6.14 |
| Mtr.45910.1.S1_at   | Hypothetical protein                       | 6.13 |
| Mtr.49234.1.S1_at   | Protein kinase                             | 6.11 |
| Msa.1709.1.S1_at    | Hypothetical protein                       | 6.11 |
| Mtr.13044.1.S1_at   | WRKY transcription factor                  | 6.11 |
| Mtr.43707.1.S1_at   | Hypothetical protein                       | 6.11 |
| Mtr.43706.1.S1_at   | Hypothetical protein                       | 6.10 |
| Mtr.3345.1.S1_at    | Hypothetical protein                       | 6.10 |
| Mtr.51664.1.S1_s_at | Hypothetical protein                       | 6.08 |
| Mtr.10308.1.S1_at   | Hydroxyproline-rich glycoprotein           | 6.08 |
| Mtr.42692.1.S1_at   | Glutaredoxin-like protein                  | 6.07 |
| Mtr.38959.1.S1_s_at | GTP-binding protein                        | 6.07 |

|                     |                                                    |      |
|---------------------|----------------------------------------------------|------|
| Mtr.12772.1.S1_at   | Mlo protein homolog                                | 6.07 |
| Mtr.13150.1.S1_at   | Hypothetical protein                               | 6.07 |
| Mtr.11986.1.S1_at   | WD40-repeat protein                                | 6.06 |
| Mtr.50585.1.S1_at   | Proteinase inhibitor I3                            | 6.06 |
| Mtr.38799.1.S1_at   | Cytokinin oxidase-like protein                     | 6.06 |
| Mtr.51916.1.S1_at   | Hypothetical protein                               | 6.06 |
| Mtr.25168.1.S1_at   | Hypothetical protein                               | 6.06 |
| Mtr.15470.1.S1_at   | Amino acid/polyamine transporter II                | 6.05 |
| Mtr.43416.1.S1_at   | Zinc-finger protein                                | 6.05 |
| Mtr.41223.1.S1_at   | ATP-dependent phosphoenolpyruvate carboxykinase    | 6.04 |
| Mtr.37277.1.S1_at   | Calcium-dependent protein kinase                   | 6.03 |
| Msa.2329.1.S1_at    | Hypothetical protein                               | 6.03 |
| Mtr.10049.1.S1_at   | Biotin synthase                                    | 6.03 |
| Mtr.39460.1.S1_at   | Hypothetical protein                               | 6.02 |
| Mtr.6178.1.S1_at    | Alanine racemase                                   | 6.02 |
| Mtr.9478.1.S1_at    | Laccase-like protein                               | 6.00 |
| Mtr.42353.1.S1_at   | NADH dehydrogenase subunit 3                       | 6.00 |
| Mtr.24465.1.S1_x_at | Putative receptor-like protein kinase              | 5.98 |
| Mtr.16728.1.S1_at   | Hypothetical protein                               | 5.98 |
| Mtr.11612.1.S1_at   | Hypothetical protein                               | 5.98 |
| Mtr.41599.1.S1_s_at | SNARE-interacting protein KEULE                    | 5.97 |
| Mtr.10655.1.S1_at   | Hypothetical protein                               | 5.96 |
| Msa.1241.1.S1_at    | Hypothetical protein                               | 5.95 |
| Msa.3111.1.S1_x_at  | Hypothetical protein                               | 5.95 |
| Mtr.41427.1.S1_at   | Pyruvate, phosphate dikinase                       | 5.95 |
| Mtr.50492.1.S1_s_at | Ribosomal protein L3                               | 5.95 |
| Msa.2831.1.S1_at    | Hypothetical protein                               | 5.93 |
| Mtr.18747.1.S1_at   | Hypothetical protein                               | 5.93 |
| Mtr.43272.1.S1_at   | Hypothetical protein                               | 5.93 |
| Mtr.11112.1.S1_at   | Hypothetical protein                               | 5.93 |
| Mtr.32666.1.S1_at   | Hypothetical protein                               | 5.92 |
| Mtr.10253.1.S1_at   | Cellulose synthase                                 | 5.92 |
| Mtr.11385.1.S1_at   | Hypothetical protein                               | 5.92 |
| Mtr.5032.1.S1_at    | KIC-related protein                                | 5.92 |
| Mtr.40075.1.S1_at   | Pprg2 protein                                      | 5.91 |
| Mtr.44404.1.S1_s_at | Hypothetical protein                               | 5.91 |
| Mtr.33536.1.S1_at   | Sugar transporter-like protein                     | 5.90 |
| Mtr.47936.1.S1_at   | Hypothetical protein                               | 5.90 |
| Mtr.912.1.S1_s_at   | ATP citrate lyase a-subunit                        | 5.89 |
| Mtr.9214.1.S1_at    | Hypothetical protein                               | 5.89 |
| Mtr.48875.1.S1_s_at | Hypothetical protein                               | 5.89 |
| Mtr.21501.1.S1_at   | Zn-finger, RING                                    | 5.89 |
| Mtr.35960.1.S1_at   | 1, 3-beta-glucanase-like protein                   | 5.89 |
| Mtr.15172.1.S1_at   | Leucine-rich repeat receptor-like protein kinase 1 | 5.89 |
| Mtr.11788.1.S1_at   | Hypothetical protein                               | 5.87 |
| Mtr.13161.1.S1_at   | Hypothetical protein                               | 5.87 |
| Mtr.35172.1.S1_at   | Hypothetical protein                               | 5.87 |
| Msa.1270.1.S1_at    | Hypothetical protein                               | 5.86 |
| Mtr.51256.1.S1_at   | Transferase                                        | 5.86 |
| Mtr.6526.1.S1_at    | Hypothetical protein                               | 5.86 |
| Mtr.26364.1.S1_at   | Hypothetical protein                               | 5.86 |
| Mtr.52124.1.S1_s_at | Phosphate-induced protein                          | 5.86 |
| Mtr.47542.1.S1_at   | Hypothetical protein                               | 5.86 |
| Mtr.40239.1.S1_at   | Phosphoenolpyruvate carboxykinase                  | 5.85 |

|                        |                                                    |      |
|------------------------|----------------------------------------------------|------|
| Mtr.37168.1.S1_at      | Hypothetical protein                               | 5.85 |
| Mtr.37374.1.S1_at      | Patatin-like protein                               | 5.85 |
| Mtr.35662.1.S1_at      | Hypothetical protein                               | 5.85 |
| Mtr.12240.1.S1_at      | Envelope glycoprotein                              | 5.85 |
| Mtr.37283.1.S1_s_at    | Pathogen-inducible alpha-dioxygenase               | 5.85 |
| Mtr.26459.1.S1_at      | Avr9/Cf-9 rapidly elicited protein                 | 5.84 |
| Mtr.40847.1.S1_at      | Hypothetical protein                               | 5.84 |
| Mtr.45270.1.S1_at      | Hypothetical protein                               | 5.84 |
| Mtr.12783.1.S1_at      | Heat shock protein                                 | 5.84 |
| Mtr.37678.1.S1_at      | Oxoglutarate transaminase I                        | 5.83 |
| Mtr.41962.1.S1_at      | Ketol-acid reductoisomerase                        | 5.83 |
| MsaAffx.3537.1.S1_s_at | Hypothetical protein                               | 5.83 |
| Mtr.28547.1.S1_s_at    | Glutathione S-transferase GST                      | 5.83 |
| Mtr.13060.1.S1_at      | Hypothetical protein                               | 5.82 |
| Mtr.25525.1.S1_at      | Hypothetical protein                               | 5.80 |
| Mtr.36359.1.S1_s_at    | Hypothetical protein                               | 5.79 |
| Mtr.27828.1.S1_at      | Phospholipase D                                    | 5.78 |
| Mtr.37831.1.S1_at      | Hypothetical protein                               | 5.77 |
| Mtr.11728.1.S1_at      | Hypothetical protein                               | 5.77 |
| Mtr.33441.1.S1_s_at    | Hypothetical protein                               | 5.77 |
| Mtr.9063.1.S1_at       | Glucose/sorbosone dehydrogenases-like protein      | 5.76 |
| Mtr.1018.1.S1_s_at     | GDP-mannose transporter                            | 5.75 |
| Mtr.44925.1.S1_at      | Hypothetical protein                               | 5.73 |
| Mtr.52317.1.S1_at      | Hypothetical protein                               | 5.73 |
| Mtr.45563.1.S1_at      | PDR9 ABC transporter                               | 5.73 |
| Mtr.33142.1.S1_at      | Hypothetical protein                               | 5.73 |
| Mtr.42571.1.S1_at      | MutT domain protein                                | 5.71 |
| Mtr.35520.1.S1_at      | Hypothetical protein                               | 5.71 |
| Mtr.39287.1.S1_at      | SGP1 monomeric G-protein                           | 5.71 |
| Mtr.25966.1.S1_at      | Hypothetical protein                               | 5.70 |
| Mtr.48874.1.S1_at      | Hypothetical protein                               | 5.69 |
| Mtr.11072.1.S1_at      | Hypothetical protein                               | 5.69 |
| Mtr.1401.1.S1_at       | Hypothetical protein                               | 5.68 |
| Mtr.13407.1.S1_at      | Hypothetical protein                               | 5.68 |
| Mtr.40911.1.S1_s_at    | Cationic peroxidase 2                              | 5.68 |
| Mtr.35045.1.S1_at      | Rab escort protein                                 | 5.68 |
| Mtr.47908.1.S1_at      | Hypothetical protein                               | 5.67 |
| Mtr.13237.1.S1_at      | Hypothetical protein                               | 5.66 |
| Mtr.7249.1.S1_at       | N-hydroxycinnamoyl/benzoyltransferase-like protein | 5.66 |
| Mtr.50912.1.S1_s_at    | Hypothetical protein                               | 5.65 |
| Mtr.985.1.S1_at        | Hypothetical protein                               | 5.65 |
| Mtr.8425.1.S1_at       | Hypothetical protein                               | 5.65 |
| Mtr.28550.1.S1_at      | Hypothetical protein                               | 5.64 |
| Mtr.12589.1.S1_at      | Acetyl-CoA carboxylase                             | 5.63 |
| Mtr.40933.1.S1_at      | TIR-similar-domain-containing protein              | 5.63 |
| Mtr.34901.1.S1_s_at    | PDR-like ABC transporter                           | 5.63 |
| Mtr.40880.1.S1_at      | Electron transfer flavoprotein beta-subunit-like   | 5.62 |
| Mtr.9429.1.S1_at       | Transcription factor RAU1                          | 5.62 |
| Mtr.42984.1.S1_at      | Proline dehydrogenase                              | 5.61 |
| Mtr.38375.1.S1_at      | Hypothetical protein                               | 5.60 |
| Mtr.23085.1.S1_s_at    | Hypothetical protein                               | 5.60 |
| Msa.1414.1.S1_at       | Hypothetical protein                               | 5.60 |
| Mtr.12694.1.S1_at      | NAC domain protein NAC1                            | 5.59 |
| Mtr.1800.1.S1_at       | Cytochrome b                                       | 5.59 |

|                     |                                            |      |
|---------------------|--------------------------------------------|------|
| Mtr.17829.1.S1_at   | UDP-glucose 4-epimerase                    | 5.58 |
| Mtr.2486.1.S1_at    | Hypothetical protein                       | 5.58 |
| Mtr.12226.1.S1_s_at | Hypothetical protein                       | 5.58 |
| Mtr.31075.1.S1_at   | Receptor protein kinase                    | 5.58 |
| Mtr.12034.1.S1_at   | ADP/ATP translocase-like protein           | 5.58 |
| Mtr.43845.1.S1_at   | Hypothetical protein                       | 5.58 |
| Mtr.43343.1.S1_at   | Hypothetical protein                       | 5.57 |
| Mtr.6926.1.S1_at    | Hypothetical protein                       | 5.56 |
| Mtr.41494.1.S1_at   | Hypothetical protein                       | 5.56 |
| Mtr.40203.1.S1_at   | Aldehyde dehydrogenase (NAD <sup>+</sup> ) | 5.56 |
| Mtr.1526.1.S1_a_at  | Hypothetical protein                       | 5.54 |
| Mtr.27812.1.S1_at   | Hypothetical protein                       | 5.54 |
| Mtr.6918.1.S1_at    | Phospholipase PLDb1                        | 5.54 |
| Mtr.40315.1.S1_at   | Al-induced protein                         | 5.54 |
| Mtr.4958.1.S1_at    | Hypothetical protein                       | 5.54 |
| Mtr.12540.1.S1_s_at | Receptor kinase                            | 5.54 |
| Mtr.48787.1.S1_s_at | WD-40 repeat protein                       | 5.53 |
| Mtr.43583.1.S1_at   | Hypothetical protein                       | 5.53 |
| Mtr.19235.1.S1_at   | Hypothetical protein                       | 5.53 |
| Mtr.24063.1.S1_at   | Hypothetical protein                       | 5.53 |
| Mtr.33188.1.S1_at   | Hypothetical protein                       | 5.52 |
| Mtr.32188.1.S1_x_at | Chalcone synthase 9                        | 5.52 |
| Mtr.31327.1.S1_s_at | Protein kinase                             | 5.51 |
| Mtr.12497.1.S1_at   | Protein kinase                             | 5.50 |
| Mtr.12412.1.S1_at   | Glutamate dehydrogenase 1 (GDH 1)          | 5.49 |
| Mtr.50046.1.S1_at   | Hypothetical protein                       | 5.49 |
| Mtr.38086.1.S1_at   | Alpha-N-acetylglucosaminidase              | 5.49 |
| Mtr.25306.1.S1_at   | Prolyl 4-hydroxylase, alpha subunit        | 5.48 |
| Mtr.8935.1.S1_at    | Alternative oxidase 3                      | 5.48 |
| Mtr.41983.1.S1_at   | Glucosyltransferase-7                      | 5.48 |
| Mtr.33482.1.S1_s_at | Carbonic anhydrase 2                       | 5.48 |
| Mtr.50205.1.S1_at   | Hypothetical protein                       | 5.47 |
| Mtr.38064.1.S1_at   | Hypothetical protein                       | 5.47 |
| Mtr.40124.1.S1_at   | Peroxidase1B                               | 5.47 |
| Msa.2372.1.S1_at    | Hypothetical protein                       | 5.46 |
| Mtr.10619.1.S1_at   | Hypothetical protein                       | 5.46 |
| Msa.1774.1.S1_at    | Hypothetical protein                       | 5.46 |
| Mtr.9101.1.S1_at    | PDR-like ABC transporter                   | 5.46 |
| Msa.3040.1.S1_at    | Hypothetical protein                       | 5.45 |
| Mtr.40703.1.S1_at   | Hypothetical protein                       | 5.45 |
| Mtr.9613.1.S1_at    | TIR-similar-domain-containing protein      | 5.44 |
| Mtr.11134.1.S1_at   | Ornithine aminotransferase                 | 5.44 |
| Mtr.43706.1.S1_s_at | Hypothetical protein                       | 5.44 |
| Mtr.42223.1.S1_at   | Hypothetical protein                       | 5.44 |
| Mtr.4967.1.S1_at    | GTPase activating protein                  | 5.43 |
| Msa.1639.1.S1_at    | Hypothetical protein                       | 5.42 |
| Mtr.51296.1.S1_at   | Hypothetical protein                       | 5.42 |
| Mtr.45843.1.S1_at   | Hypothetical protein                       | 5.40 |
| Mtr.10408.1.S1_at   | Ferrochelatae I                            | 5.39 |
| Msa.2663.1.S1_at    | Hypothetical protein                       | 5.39 |
| Mtr.31177.1.S1_at   | Ubiquitin-protein ligase                   | 5.38 |
| Msa.3054.1.S1_at    | Hypothetical protein                       | 5.38 |
| Mtr.10616.1.S1_at   | Hypothetical protein                       | 5.38 |
| Mtr.34926.1.S1_s_at | Hypothetical protein                       | 5.37 |

|                     |                                     |      |
|---------------------|-------------------------------------|------|
| Mtr.24888.1.S1_at   | Hypothetical protein                | 5.37 |
| Mtr.11278.1.S1_at   | Hypothetical protein                | 5.37 |
| Mtr.39144.1.S1_at   | WD40-repeat protein                 | 5.37 |
| Mtr.32690.1.S1_at   | Hypothetical protein                | 5.36 |
| Mtr.44843.1.S1_at   | Hypothetical protein                | 5.35 |
| Mtr.43170.1.S1_s_at | Glutamate dehydrogenase 1 (GDH 1)   | 5.35 |
| Mtr.24715.1.S1_at   | Glutathione S-transferase GST 14    | 5.34 |
| Mtr.39919.1.S1_at   | Protein kinase                      | 5.34 |
| Mtr.35824.1.S1_at   | GATA-1 zinc finger protein          | 5.33 |
| Mtr.25611.1.S1_at   | 4-coumarate:CoA ligase              | 5.33 |
| Mtr.38510.1.S1_at   | Hypothetical protein                | 5.33 |
| Mtr.40682.1.S1_at   | Proline/glycine betaine transporter | 5.33 |
| Mtr.4702.1.S1_at    | Fiber protein Fb1                   | 5.33 |
| Mtr.40789.1.S1_at   | DNA-binding protein                 | 5.33 |
| Mtr.44516.1.S1_at   | Type IIB calcium ATPase             | 5.33 |
| Mtr.7608.1.S1_at    | 50S ribosomal protein L33           | 5.31 |
| Mtr.33221.1.S1_s_at | acyl-activating enzyme 13           | 5.31 |
| Mtr.32008.1.S1_at   | Hypothetical protein                | 5.31 |
| Mtr.37347.1.S1_s_at | Hypothetical protein                | 5.30 |
| Mtr.43291.1.S1_at   | Fiber protein Fb1                   | 5.30 |
| Mtr.35086.1.S1_at   | Hypothetical protein                | 5.30 |
| Mtr.44122.1.S1_at   | Hypothetical protein                | 5.30 |
| Mtr.47774.1.S1_at   | Hypothetical protein                | 5.28 |
| Mtr.31335.1.S1_s_at | Alcohol dehydrogenase-like protein  | 5.28 |
| Mtr.791.1.S1_at     | Acyl-activating enzyme              | 5.28 |
| Mtr.296.1.S1_at     | Hypothetical protein                | 5.28 |
| Mtr.43917.1.S1_at   | Hypothetical protein                | 5.28 |
| Mtr.2124.1.S1_s_at  | Hypothetical protein                | 5.27 |
| Mtr.25841.1.S1_at   | Plasma intrinsic protein            | 5.26 |
| Mtr.1214.1.S1_at    | Hypothetical protein                | 5.26 |
| Mtr.8548.1.S1_at    | Proline-rich cell wall protein      | 5.25 |
| Mtr.5044.1.S1_s_at  | Hypothetical protein                | 5.25 |
| Mtr.10691.1.S1_at   | ATP citrate lyase a-subunit         | 5.25 |
| Mtr.19723.1.S1_at   | Serine/threonine protein kinase     | 5.25 |
| Mtr.11357.1.S1_at   | SNARE-interacting protein KEULE     | 5.24 |
| Mtr.27551.1.S1_at   | LOB domain protein 38               | 5.24 |
| Mtr.42007.1.S1_at   | Hypothetical protein                | 5.24 |
| Mtr.42072.1.S1_at   | Nodulin                             | 5.24 |
| Mtr.6811.1.S1_s_at  | Glutathione S-transferase GST 17    | 5.23 |
| Mtr.25059.1.S1_at   | WD-40 repeat protein                | 5.22 |
| Mtr.43266.1.S1_at   | Hypothetical protein                | 5.22 |
| Mtr.13394.1.S1_at   | Hypothetical protein                | 5.21 |
| Mtr.82.1.S1_at      | STS14 protein                       | 5.20 |
| Mtr.31406.1.S1_x_at | Isoflavonoid glucosyltransferase    | 5.20 |
| Mtr.13630.1.S1_at   | Hypothetical protein                | 5.19 |
| Mtr.35775.1.S1_at   | Hypothetical protein                | 5.19 |
| Mtr.37393.1.S1_at   | Hypothetical protein                | 5.19 |
| Mtr.37412.1.S1_s_at | Chalcone-flavonone isomerase        | 5.19 |
| Mtr.51042.1.S1_at   | Hypothetical protein                | 5.18 |
| Mtr.50280.1.S1_at   | Protein kinase                      | 5.18 |
| Mtr.19727.1.S1_at   | Hypothetical protein                | 5.18 |
| Mtr.22601.1.S1_at   | Endoxyloglucan transferase          | 5.17 |
| Mtr.21035.1.S1_at   | Sugar transporter                   | 5.17 |
| Mtr.18369.1.S1_at   | Glutathione S-transferase           | 5.17 |



|                     |                                                |      |
|---------------------|------------------------------------------------|------|
| Mtr.20215.1.S1_s_at | Hypothetical protein                           | 5.16 |
| Mtr.13949.1.S1_at   | PLU-1 protein                                  | 5.16 |
| Mtr.30853.1.S1_at   | Sugar transporter                              | 5.16 |
| Mtr.15228.1.S1_at   | Hypothetical protein                           | 5.16 |
| Mtr.20315.1.S1_at   | Adenine phosphoribosyltransferase-like protein | 5.15 |
| Mtr.15448.1.S1_at   | Gibberellin regulated protein                  | 5.14 |
| Mtr.2282.1.S1_at    | Hypothetical protein                           | 5.13 |
| Mtr.44257.1.S1_s_at | Hypothetical protein                           | 5.13 |
| Mtr.9897.1.S1_at    | Glycerol kinase                                | 5.12 |
| Mtr.39894.1.S1_at   | Dermal papilla derived protein                 | 5.12 |
| Mtr.11383.1.S1_at   | Hypothetical protein                           | 5.12 |
| Mtr.4702.1.S1_s_at  | Fiber protein Fb1                              | 5.12 |
| Mtr.15523.1.S1_at   | U box protein                                  | 5.12 |
| Mtr.38274.1.S1_at   | Steroid 22-alpha-hydroxylase                   | 5.11 |
| Mtr.12525.1.S1_at   | Chitinase                                      | 5.10 |
| Msa.996.1.S1_at     | Hypothetical protein                           | 5.10 |
| Mtr.51562.1.S1_at   | No apical meristem (NAM) protein               | 5.09 |
| Mtr.33428.1.S1_at   | Hypothetical protein                           | 5.09 |
| Mtr.37284.1.S1_at   | Topoisomerase-like protein                     | 5.09 |
| Mtr.10407.1.S1_s_at | Ferrochelatase II                              | 5.09 |
| Mtr.18646.1.S1_at   | Hypothetical protein                           | 5.08 |
| Mtr.37330.1.S1_at   | Transcription factor                           | 5.08 |
| Mtr.41526.1.S1_at   | Lipoamide dehydrogenase                        | 5.08 |
| Mtr.12175.1.S1_at   | Hypothetical protein                           | 5.08 |
| Mtr.42389.1.S1_at   | Hypothetical protein                           | 5.07 |
| Mtr.14250.1.S1_at   | Arf GTPase activating protein                  | 5.07 |
| Mtr.11251.1.S1_at   | Protein integral membrane protein              | 5.06 |
| Mtr.42067.1.S1_s_at | Hypothetical protein                           | 5.06 |
| Mtr.34806.1.S1_s_at | MLO-like protein 2                             | 5.06 |
| Mtr.38811.1.S1_s_at | Nucleosome assembly protein 1                  | 5.06 |
| Mtr.8884.1.S1_at    | Pathogenesis-related protein 4A                | 5.06 |
| Mtr.37410.1.S1_at   | Hypothetical protein                           | 5.05 |
| Mtr.5270.1.S1_at    | Hypothetical protein                           | 5.05 |
| Mtr.43241.1.S1_at   | Transcription factor WRKY32                    | 5.04 |
| Mtr.34775.1.S1_at   | Hypothetical protein                           | 5.04 |
| Mtr.9913.1.S1_at    | Hypothetical protein                           | 5.04 |
| Mtr.24211.1.S1_at   | Hypothetical protein                           | 5.04 |
| Mtr.43364.1.S1_at   | Hypothetical protein                           | 5.03 |
| Mtr.39176.1.S1_at   | Hypothetical protein                           | 5.02 |
| Mtr.31291.1.S1_at   | Geranyl diphosphate synthase large subunit     | 5.01 |
| Mtr.43799.1.S1_at   | Hypothetical protein                           | 5.00 |
| Mtr.43853.1.S1_at   | Hypothetical protein                           | 5.00 |
| Mtr.44780.1.S1_at   | Hypothetical protein                           | 5.00 |
| Mtr.13094.1.S1_at   | GTP-binding protein                            | 5.00 |
| Msa.884.1.S1_at     | Hypothetical protein                           | 5.00 |
| Mtr.32104.1.S1_s_at | Respiratory burst oxidase homolog              | 4.99 |
| Mtr.49012.1.S1_at   | Zn-finger                                      | 4.99 |
| Mtr.5195.1.S1_at    | Hypothetical protein                           | 4.99 |
| Mtr.9552.1.S1_at    | Protein kinase                                 | 4.98 |
| Mtr.48688.1.S1_at   | DNA-binding WRKY                               | 4.98 |
| Mtr.39742.1.S1_at   | Hypothetical protein                           | 4.97 |
| Mtr.47441.1.S1_at   | Hypothetical protein                           | 4.96 |
| Mtr.38205.1.S1_at   | Mannose transporter                            | 4.96 |
| Mtr.42289.1.S1_at   | Hypothetical protein                           | 4.96 |

|                     |                                                     |      |
|---------------------|-----------------------------------------------------|------|
| Mtr.36847.1.S1_at   | Hypothetical protein                                | 4.96 |
| Mtr.43236.1.S1_at   | UDP-glucosyltransferase                             | 4.96 |
| Mtr.27895.1.S1_at   | Ser/Thr protein phosphatase 2C                      | 4.95 |
| Mtr.12626.1.S1_at   | Snakin-1                                            | 4.95 |
| Msa.582.1.S1_at     | Hypothetical protein                                | 4.94 |
| Mtr.1549.1.S1_at    | Hypothetical protein                                | 4.94 |
| Mtr.12688.1.S1_at   | Hypothetical protein                                | 4.93 |
| Mtr.34217.1.S1_at   | Ss-galactosidase                                    | 4.93 |
| Mtr.40685.1.S1_at   | Hypothetical protein                                | 4.93 |
| Mtr.2158.1.S1_at    | Hypothetical protein                                | 4.93 |
| Mtr.51563.1.S1_at   | Threonine synthase                                  | 4.92 |
| Mtr.29652.1.S1_at   | Hypothetical protein                                | 4.92 |
| Msa.2661.1.S1_at    | Hypothetical protein                                | 4.92 |
| Mtr.27222.1.S1_at   | Hypothetical protein                                | 4.92 |
| Mtr.9141.1.S1_at    | Hypothetical protein                                | 4.91 |
| Mtr.31614.1.S1_at   | WD-repeat protein                                   | 4.91 |
| Mtr.37965.1.S1_at   | Hypothetical protein                                | 4.91 |
| Mtr.45293.1.S1_s_at | Hypothetical protein                                | 4.91 |
| Mtr.8705.1.S1_at    | Hypothetical protein                                | 4.90 |
| Msa.1436.1.S1_at    | Hypothetical protein                                | 4.90 |
| Msa.2215.1.S1_at    | Hypothetical protein                                | 4.90 |
| Mtr.12760.1.S1_at   | Hypothetical protein                                | 4.90 |
| Mtr.10976.1.S1_at   | WRKY transcription factor                           | 4.89 |
| Mtr.26606.1.S1_at   | Hypothetical protein                                | 4.89 |
| Mtr.27313.1.S1_at   | Receptor kinase-like protein                        | 4.89 |
| Mtr.13645.1.S1_at   | Hypothetical protein                                | 4.89 |
| Mtr.37412.1.S1_at   | Chalcone-flavonone isomerase                        | 4.87 |
| Mtr.13139.1.S1_at   | Carbonate dehydratase-like protein                  | 4.86 |
| Mtr.9546.1.S1_at    | Hypothetical protein                                | 4.86 |
| Mtr.35144.1.S1_s_at | Acyl-activating enzyme                              | 4.86 |
| Mtr.10018.1.S1_at   | Hypothetical protein                                | 4.86 |
| Mtr.12946.1.S1_at   | Zinc finger (C3HC4-type RING finger) family protein | 4.85 |
| Mtr.15895.1.S1_s_at | Hypothetical protein                                | 4.85 |
| Mtr.39774.1.S1_at   | Ttg1-like protein                                   | 4.85 |
| Mtr.42470.1.S1_x_at | Alpha galactosidase                                 | 4.85 |
| Mtr.24755.1.S1_at   | Hypothetical protein                                | 4.85 |
| Mtr.47143.1.S1_s_at | Brassinosteroid-regulated protein BRU1              | 4.85 |
| Mtr.43378.1.S1_at   | Beta-1,3 glucanase precursor                        | 4.85 |
| Mtr.17517.1.S1_at   | Hypothetical protein                                | 4.84 |
| Mtr.30227.1.S1_at   | Hypothetical protein                                | 4.83 |
| Mtr.12220.1.S1_at   | Phi-1 protein                                       | 4.82 |
| Mtr.30167.1.S1_at   | Hypothetical protein                                | 4.82 |
| Mtr.16873.1.S1_s_at | O-methyltransferase                                 | 4.81 |
| Msa.3096.1.S1_at    | Hypothetical protein                                | 4.81 |
| Mtr.1266.1.S1_at    | Protein kinase                                      | 4.81 |
| Mtr.27351.1.S1_at   | Protein kinase                                      | 4.81 |
| Mtr.49053.1.S1_at   | Hypothetical protein                                | 4.81 |
| Mtr.37779.1.S1_at   | Formate dehydrogenase                               | 4.81 |
| Mtr.10701.1.S1_at   | Axi 1 protein-like protein                          | 4.80 |
| Mtr.40651.1.S1_at   | Hypothetical protein                                | 4.80 |
| Mtr.10629.1.S1_at   | Caffeoyl-CoA O-methyltransferase                    | 4.80 |
| Mtr.6545.1.S1_x_at  | Hypothetical protein                                | 4.80 |
| Mtr.930.1.S1_at     | Hypothetical protein                                | 4.80 |
| Mtr.11140.1.S1_at   | Protein kinase APK1B                                | 4.79 |

|                     |                                            |      |
|---------------------|--------------------------------------------|------|
| Mtr.246.1.S1_at     | DnaJ-like protein                          | 4.79 |
| Mtr.44747.1.S1_at   | Secreted glycoprotein                      | 4.79 |
| Mtr.8789.1.S1_s_at  | Formate dehydrogenase                      | 4.79 |
| Mtr.42470.1.S1_at   | Alpha galactosidase                        | 4.78 |
| Mtr.40284.1.S1_at   | Hypothetical protein                       | 4.78 |
| Mtr.44123.1.S1_at   | Lipase class 3-like                        | 4.78 |
| Mtr.30474.1.S1_s_at | Hypothetical protein                       | 4.78 |
| Mtr.18117.1.S1_at   | Hypothetical protein                       | 4.78 |
| Mtr.31575.1.S1_at   | Phosphoribosylanthranilate transferase     | 4.78 |
| Mtr.10974.1.S1_at   | Hypothetical protein                       | 4.78 |
| Mtr.4918.1.S1_at    | S-receptor kinase                          | 4.78 |
| Msa.2673.1.S1_at    | Hypothetical protein                       | 4.77 |
| Mtr.7708.1.S1_s_at  | Hypothetical protein                       | 4.77 |
| Mtr.6696.1.S1_at    | Hypothetical protein                       | 4.77 |
| Mtr.42052.1.S1_at   | F-box family protein                       | 4.77 |
| Mtr.27992.1.S1_at   | Hypothetical protein                       | 4.76 |
| Mtr.5337.1.S1_at    | Hypothetical protein                       | 4.76 |
| Msa.1875.1.S1_at    | Hypothetical protein                       | 4.76 |
| Mtr.35604.1.S1_at   | Lipase family protein                      | 4.74 |
| Mtr.6009.1.S1_at    | Hypothetical protein                       | 4.73 |
| Mtr.9913.1.S1_s_at  | Hypothetical protein                       | 4.73 |
| Mtr.38424.1.S1_at   | Lectin-like receptor kinase                | 4.72 |
| Mtr.9668.1.S1_at    | Hypothetical protein                       | 4.72 |
| Mtr.8990.1.S1_at    | Hypothetical protein                       | 4.72 |
| Mtr.6378.1.S1_at    | 1-aminocyclopropanecarboxylic acid oxidase | 4.71 |
| Mtr.2720.1.S1_at    | Gyrase A                                   | 4.71 |
| Mtr.5765.1.S1_at    | Receptor-like protein kinase               | 4.71 |
| Mtr.9938.1.S1_at    | Dihydrodipicolinate synthase               | 4.71 |
| Mtr.12312.1.S1_at   | ATP citrate lyase b-subunit                | 4.71 |
| Mtr.30446.1.S1_at   | Cystinosin                                 | 4.70 |
| Mtr.31877.1.S1_at   | P-glycoprotein-like                        | 4.70 |
| Mtr.1851.1.S1_s_at  | Secreted glycoprotein                      | 4.69 |
| Mtr.37202.1.S1_at   | Cyclic nucleotide gated channel            | 4.68 |
| Mtr.33360.1.S1_at   | Hypothetical protein                       | 4.68 |
| Mtr.29044.1.S1_at   | Hypothetical protein                       | 4.68 |
| Mtr.2889.1.S1_at    | Hypothetical protein                       | 4.68 |
| Msa.1940.1.S1_at    | Hypothetical protein                       | 4.68 |
| Mtr.2627.1.S1_at    | Hypothetical protein                       | 4.68 |
| Mtr.44816.1.S1_at   | Hypothetical protein                       | 4.67 |
| Mtr.41503.1.S1_at   | Hypothetical protein                       | 4.67 |
| Mtr.20821.1.S1_at   | Zinc finger protein, CONSTANS type         | 4.67 |
| Mtr.5950.1.S1_s_at  | Zinc finger protein                        | 4.66 |
| Mtr.37524.1.S1_at   | Hypothetical protein                       | 4.66 |
| Mtr.44393.1.S1_at   | Transformer-SR ribonucleoprotein           | 4.65 |
| Mtr.11388.1.S1_at   | Transcription factor                       | 4.65 |
| Mtr.41307.1.S1_at   | Hypothetical protein                       | 4.65 |
| Mtr.43258.1.S1_s_at | Hypothetical protein                       | 4.65 |
| Mtr.50859.1.S1_s_at | Hypothetical protein                       | 4.64 |
| Mtr.428.1.S1_at     | Leucine rich repeat protein family         | 4.64 |
| Mtr.8726.1.S1_at    | Hypothetical protein                       | 4.64 |
| Mtr.13347.1.S1_at   | Lipoxygenase                               | 4.64 |
| Mtr.8621.1.S1_s_at  | Hypothetical protein                       | 4.64 |
| Mtr.4342.1.S1_at    | Hypothetical protein                       | 4.63 |
| Mtr.21000.1.S1_at   | Universal stress protein                   | 4.63 |

|                     |                                          |      |
|---------------------|------------------------------------------|------|
| Mtr.33203.1.S1_at   | Hypothetical protein                     | 4.63 |
| Mtr.48130.1.S1_at   | Hypothetical protein                     | 4.63 |
| Mtr.41380.1.S1_at   | Hypothetical protein                     | 4.62 |
| Mtr.43294.1.S1_at   | Non-specific lipid transfer-like protein | 4.62 |
| Mtr.49745.1.S1_s_at | Tyrosine specific protein phosphatase    | 4.61 |
| Mtr.20378.1.S1_at   | Sugar transporter                        | 4.61 |
| Mtr.9074.1.S1_at    | Hypothetical protein                     | 4.61 |
| Mtr.35088.1.S1_at   | Hypothetical protein                     | 4.61 |
| Msa.1264.1.S1_at    | Hypothetical protein                     | 4.61 |
| Mtr.12004.1.S1_at   | Hypothetical protein                     | 4.60 |
| Mtr.33253.1.S1_at   | Hypothetical protein                     | 4.60 |
| Mtr.2673.1.S1_s_at  | Hypothetical protein                     | 4.60 |
| Mtr.16859.1.S1_at   | Calcium-binding EF-hand                  | 4.59 |
| Mtr.13391.1.S1_at   | Hypothetical protein                     | 4.59 |
| Mtr.5530.1.S1_s_at  | Hypothetical protein                     | 4.58 |
| Mtr.37425.1.S1_at   | Transcription factor WRKY10              | 4.57 |
| Mtr.12209.1.S1_at   | Phi-1 protein                            | 4.57 |
| Mtr.42466.1.S1_at   | Phosphate transporter                    | 4.57 |
| Mtr.52294.1.S1_at   | DNA photolyase                           | 4.57 |
| Mtr.16110.1.S1_at   | Ankyrin protein                          | 4.56 |
| Mtr.38461.1.S1_at   | Calmodulin-like domain protein kinase    | 4.56 |
| Msa.937.1.S1_at     | Hypothetical protein                     | 4.56 |
| Mtr.44296.1.S1_at   | Cellulose synthase-like protein          | 4.55 |
| Mtr.16849.1.S1_at   | Protein kinase                           | 4.55 |
| Mtr.13422.1.S1_at   | Hypothetical protein                     | 4.55 |
| Mtr.409.1.S1_at     | Hypothetical protein                     | 4.55 |
| Mtr.38581.1.S1_at   | Zinc finger protein                      | 4.55 |
| Mtr.43604.1.S1_s_at | Hypothetical protein                     | 4.53 |
| Mtr.12972.1.S1_at   | Hypothetical protein                     | 4.53 |
| Mtr.40005.1.S1_at   | Hypothetical protein                     | 4.52 |
| Mtr.17135.1.S1_at   | Phospholipid-translocating P-type ATPase | 4.52 |
| Mtr.41232.1.S1_at   | Cytochrome b5                            | 4.52 |
| Mtr.27830.1.S1_at   | Arginine/serine-rich protein             | 4.52 |
| Mtr.38027.1.S1_at   | Hypothetical protein                     | 4.52 |
| Mtr.1516.1.S1_at    | S-receptor kinase-like protein           | 4.52 |
| Mtr.2541.1.S1_at    | RuvB DNA helicase-like protein           | 4.52 |
| Msa.1370.1.S1_at    | Hypothetical protein                     | 4.52 |
| Mtr.51608.1.S1_at   | Plant lipid transfer protein             | 4.51 |
| Mtr.12703.1.S1_at   | Hypothetical protein                     | 4.51 |
| Mtr.42229.1.S1_at   | Hypothetical protein                     | 4.51 |
| Mtr.50954.1.S1_s_at | Hypothetical protein                     | 4.51 |
| Mtr.48842.1.S1_at   | Hypothetical protein                     | 4.51 |
| Mtr.9195.1.S1_at    | Hypothetical protein                     | 4.50 |
| Mtr.33603.1.S1_s_at | Transaldolase                            | 4.50 |
| Mtr.1854.1.S1_at    | Hypothetical protein                     | 4.50 |
| Msa.1491.1.S1_at    | Hypothetical protein                     | 4.49 |
| Mtr.13605.1.S1_at   | Hypothetical protein                     | 4.49 |
| Mtr.15799.1.S1_at   | Hypothetical protein                     | 4.49 |
| Mtr.38001.1.S1_at   | Hypothetical protein                     | 4.49 |
| Mtr.12550.1.S1_at   | Steroid sulfotransferase-like protein    | 4.49 |
| Mtr.13183.1.S1_at   | Hypothetical protein                     | 4.49 |
| Mtr.46642.1.S1_at   | Protein kinase family                    | 4.48 |
| Mtr.11560.1.S1_s_at | ADP/ATP translocase-like protein         | 4.48 |
| Mtr.48288.1.S1_s_at | Senescence-associated protein            | 4.48 |

|                     |                                                   |      |
|---------------------|---------------------------------------------------|------|
| Mtr.17825.1.S1_at   | Hypothetical protein                              | 4.47 |
| Mtr.5506.1.S1_at    | Protein phosphatase 2C                            | 4.47 |
| Msa.2981.1.S1_at    | Hypothetical protein                              | 4.46 |
| Mtr.22270.1.S1_s_at | Hypothetical protein                              | 4.46 |
| Mtr.24411.1.S1_at   | Hypothetical protein                              | 4.45 |
| Mtr.13823.1.S1_at   | Hypothetical protein                              | 4.45 |
| Mtr.7313.1.S1_at    | 50S ribosomal protein L3-2                        | 4.45 |
| Mtr.13087.1.S1_at   | Hypothetical protein                              | 4.45 |
| Mtr.37651.1.S1_s_at | 5-enolpyruvylshikimate-3-phosphate synthase       | 4.44 |
| Mtr.35231.1.S1_s_at | Pathogenesis-related protein                      | 4.44 |
| Mtr.10807.1.S1_at   | Hypothetical protein                              | 4.44 |
| Mtr.41245.1.S1_at   | Chorismate mutase                                 | 4.44 |
| Msa.820.1.S1_at     | Hypothetical protein                              | 4.44 |
| Mtr.32738.1.S1_at   | Myo-inositol oxygenase                            | 4.43 |
| Msa.1800.1.S1_at    | Hypothetical protein                              | 4.43 |
| Mtr.21266.1.S1_at   | Hypothetical protein                              | 4.43 |
| Mtr.39168.1.S1_at   | Dihydrodipicolinate synthase                      | 4.43 |
| Mtr.13110.1.S1_at   | Fiber protein Fb2                                 | 4.42 |
| Mtr.7440.1.S1_at    | Hypothetical protein                              | 4.41 |
| Mtr.39664.1.S1_at   | Hypothetical protein                              | 4.41 |
| Mtr.5605.1.S1_at    | Protein phosphatase 2C                            | 4.41 |
| Mtr.12229.1.S1_s_at | RING zinc finger protein                          | 4.41 |
| Mtr.27180.1.S1_at   | Hypothetical protein                              | 4.41 |
| Mtr.318.1.S1_at     | OPR3 (12-oxophytodienoic acid 10,11-reductase)    | 4.41 |
| Mtr.9440.1.S1_at    | Hypothetical protein                              | 4.40 |
| Mtr.14950.1.S1_s_at | H <sup>+</sup> -transporting two-sector ATPase    | 4.40 |
| Mtr.5260.1.S1_at    | Hypothetical protein                              | 4.40 |
| Mtr.31621.1.S1_at   | Hypothetical protein                              | 4.40 |
| Mtr.51564.1.S1_at   | Glycoside hydrolase                               | 4.40 |
| Mtr.1532.1.S1_at    | Hypothetical protein                              | 4.40 |
| Mtr.2945.1.S1_at    | NADP <sup>+</sup> reductase                       | 4.39 |
| Mtr.7373.1.S1_at    | Hypothetical protein                              | 4.39 |
| Mtr.6315.1.S1_at    | GCN4-complementing protein (GCP1)                 | 4.39 |
| Mtr.43201.1.S1_s_at | 110 kDa 4SNc-Tudor domain protein                 | 4.39 |
| Mtr.23797.1.S1_s_at | Brassinosteroid-regulated protein BRU1            | 4.39 |
| Mtr.45319.1.S1_at   | Hypothetical protein                              | 4.39 |
| Mtr.33759.1.S1_at   | F-box family protein                              | 4.39 |
| Mtr.12234.1.S1_s_at | 40S ribosomal protein S4                          | 4.38 |
| Msa.821.1.S1_at     | Hypothetical protein                              | 4.38 |
| Mtr.9209.1.S1_at    | Hypothetical protein                              | 4.38 |
| Mtr.38773.1.S1_at   | Protein kinase                                    | 4.37 |
| Mtr.34161.1.S1_at   | Amino acid permease-like protein                  | 4.37 |
| Mtr.12925.1.S1_at   | RING/C3HC4/PHD zinc finger-like protein           | 4.37 |
| Mtr.42649.1.S1_at   | Hypothetical protein                              | 4.37 |
| Mtr.12146.1.S1_at   | Hypothetical protein                              | 4.37 |
| Msa.3094.1.S1_at    | Hypothetical protein                              | 4.37 |
| Mtr.31998.1.S1_at   | Epoxide hydrolase                                 | 4.37 |
| Mtr.24000.1.S1_at   | Pentatricopeptide (PPR) repeat-containing protein | 4.37 |
| Mtr.15773.1.S1_at   | Cyclin-like F-box                                 | 4.36 |
| Mtr.18680.1.S1_at   | Heat shock protein                                | 4.36 |
| Mtr.32924.1.S1_at   | Heat shock protein                                | 4.36 |
| Mtr.10798.1.S1_at   | Hypothetical protein                              | 4.36 |
| Mtr.30716.1.S1_at   | Hypothetical protein                              | 4.36 |
| Mtr.40054.1.S1_at   | Hypothetical protein                              | 4.36 |

|                     |                                                                         |      |
|---------------------|-------------------------------------------------------------------------|------|
| Mtr.43097.1.S1_at   | Beta-amylase                                                            | 4.36 |
| Mtr.14781.1.S1_at   | Hypothetical protein                                                    | 4.35 |
| Mtr.43825.1.S1_at   | Hypothetical protein                                                    | 4.35 |
| Mtr.11118.1.S1_at   | Calcium-dependent protein kinase                                        | 4.35 |
| Mtr.48971.1.S1_at   | Cytochrome oxidase                                                      | 4.35 |
| Msa.3189.1.S1_at    | Hypothetical protein                                                    | 4.35 |
| Mtr.31364.1.S1_at   | Phosphoglycerate dehydrogenase                                          | 4.35 |
| Mtr.42808.1.S1_at   | Myb-related transcription factor                                        | 4.35 |
| Mtr.13338.1.S1_at   | Hypothetical protein                                                    | 4.35 |
| Mtr.1356.1.S1_at    | Hypothetical protein                                                    | 4.34 |
| Mtr.49421.1.S1_at   | 2OG-Fe(II) oxygenase                                                    | 4.34 |
| Mtr.38026.1.S1_at   | Hypothetical protein                                                    | 4.34 |
| Mtr.43550.1.S1_at   | Tyrosine aminotransferase                                               | 4.34 |
| Mtr.48718.1.S1_at   | Galactose-binding protein                                               | 4.34 |
| Mtr.37208.1.S1_at   | Hypothetical protein                                                    | 4.34 |
| Mtr.8633.1.S1_at    | Hypothetical protein                                                    | 4.34 |
| Mtr.12430.1.S1_s_at | Mature anther-specific protein                                          | 4.33 |
| Mtr.38197.1.S1_at   | Hypothetical protein                                                    | 4.33 |
| Mtr.42600.1.S1_at   | Hypothetical protein                                                    | 4.33 |
| Mtr.18476.1.S1_at   | Hypothetical protein                                                    | 4.33 |
| Mtr.29063.1.S1_at   | Hypothetical protein                                                    | 4.33 |
| Mtr.41435.1.S1_s_at | Hypothetical protein                                                    | 4.33 |
| Mtr.41945.1.S1_at   | Hypothetical protein                                                    | 4.32 |
| Mtr.40076.1.S1_at   | RNA Binding Protein                                                     | 4.32 |
| Mtr.7011.1.S1_at    | Hypothetical protein                                                    | 4.32 |
| Mtr.27429.1.S1_at   | Homocysteine S-methyltransferase 1                                      | 4.31 |
| Mtr.11530.1.S1_at   | Hypothetical protein                                                    | 4.31 |
| Mtr.23414.1.S1_at   | Hypothetical protein                                                    | 4.31 |
| Mtr.18420.1.S1_at   | Hypothetical protein                                                    | 4.30 |
| Mtr.42888.1.S1_s_at | Phi-1 protein                                                           | 4.30 |
| Mtr.35836.1.S1_at   | Hypothetical protein                                                    | 4.30 |
| Mtr.12835.1.S1_at   | Hypothetical protein                                                    | 4.30 |
| Mtr.44727.1.S1_at   | Hypothetical protein                                                    | 4.30 |
| Msa.901.1.S1_a_at   | Hypothetical protein                                                    | 4.30 |
| Mtr.13824.1.S1_at   | Cyclic nucleotide-gated channel A                                       | 4.29 |
| Mtr.40696.1.S1_at   | Yeast pheromone receptor-like protein                                   | 4.29 |
| Mtr.44596.1.S1_at   | Hypothetical protein                                                    | 4.29 |
| Mtr.44341.1.S1_at   | BRASSINOSTEROID INSENSITIVE 1-associated receptor kinase 1 precursor (B | 4.28 |
| Mtr.48884.1.S1_at   | Hypothetical protein                                                    | 4.27 |
| Mtr.9442.1.S1_at    | Hypothetical protein                                                    | 4.27 |
| Mtr.10732.1.S1_at   | Hypothetical protein                                                    | 4.27 |
| Mtr.48306.1.S1_at   | Hypothetical protein                                                    | 4.27 |
| Mtr.44417.1.S1_at   | Probable disease resistance protein                                     | 4.27 |
| Msa.1168.1.S1_at    | Hypothetical protein                                                    | 4.27 |
| Mtr.31903.1.S1_at   | Stellacyanin                                                            | 4.27 |
| Mtr.16145.1.S1_s_at | Protein kinase                                                          | 4.27 |
| Mtr.33855.1.S1_at   | Alpha-N-acetylglucosaminidase                                           | 4.26 |
| Mtr.39812.1.S1_s_at | Respiratory burst oxidase homolog                                       | 4.26 |
| Mtr.42577.1.S1_s_at | Transcription factor WRKY31                                             | 4.26 |
| Mtr.11768.1.S1_at   | Hypothetical protein                                                    | 4.26 |
| Mtr.38808.1.S1_at   | Class III peroxidase                                                    | 4.26 |
| Mtr.49473.1.S1_at   | Carbamoyl-phosphate synthase L chain                                    | 4.26 |
| Mtr.35294.1.S1_at   | Protein kinase                                                          | 4.26 |
| Mtr.13033.1.S1_at   | Hypothetical protein                                                    | 4.26 |

|                     |                                            |      |
|---------------------|--------------------------------------------|------|
| Mtr.22599.1.S1_at   | Histidine decarboxylase                    | 4.25 |
| Mtr.38358.1.S1_s_at | SINA1p                                     | 4.25 |
| Mtr.27533.1.S1_s_at | Hypothetical protein                       | 4.24 |
| Mtr.9037.1.S1_at    | Glycine-rich protein                       | 4.24 |
| Mtr.12551.1.S1_at   | Monothiol glutaredoxin                     | 4.24 |
| Mtr.19308.1.S1_s_at | Cyclin-like F-box                          | 4.23 |
| Mtr.20704.1.S1_at   | Nucleosome assembly protein                | 4.23 |
| Mtr.40569.1.S1_at   | Alpha-mannosidase                          | 4.23 |
| Mtr.45398.1.S1_at   | Exo-1,3-beta-glucanase                     | 4.23 |
| Mtr.45783.1.S1_at   | Short-chain dehydrogenase/reductase        | 4.23 |
| Mtr.5723.1.S1_at    | Hypothetical protein                       | 4.23 |
| Mtr.40272.1.S1_at   | Nodulin-like protein                       | 4.23 |
| Mtr.40982.1.S1_at   | Yippee-like protein                        | 4.23 |
| Mtr.45031.1.S1_at   | Proteinase like protein                    | 4.22 |
| Mtr.24351.1.S1_s_at | Hypothetical protein                       | 4.22 |
| Mtr.50858.1.S1_s_at | Hypothetical protein                       | 4.22 |
| Mtr.32783.1.S1_at   | Myosin                                     | 4.22 |
| Mtr.40547.1.S1_at   | bZIP transcription factor                  | 4.22 |
| Mtr.12916.1.S1_at   | Hypothetical protein                       | 4.22 |
| Mtr.43257.1.S1_at   | NAC-domain protein                         | 4.22 |
| Mtr.45583.1.S1_at   | Hypothetical protein                       | 4.22 |
| Mtr.40615.1.S1_at   | Phosphate transporter                      | 4.21 |
| Mtr.11749.1.S1_at   | Hypothetical protein                       | 4.21 |
| Mtr.32999.1.S1_at   | Hypothetical protein                       | 4.21 |
| Mtr.43908.1.S1_at   | Suspensor-specific protein                 | 4.21 |
| Mtr.26369.1.S1_at   | Hypothetical protein                       | 4.21 |
| Mtr.44843.1.S1_s_at | Hypothetical protein                       | 4.20 |
| Mtr.4053.1.S1_at    | Protein kinase                             | 4.20 |
| Mtr.10424.1.S1_at   | Ethylene responsive element binding factor | 4.20 |
| Mtr.9826.1.S1_at    | Hypothetical protein                       | 4.20 |
| Mtr.40821.1.S1_at   | Abscisic acid-activated protein kinase     | 4.20 |
| Mtr.9407.1.S1_at    | Hypothetical protein                       | 4.19 |
| Mtr.10388.1.S1_at   | UDP-glucose 4-epimerase                    | 4.19 |
| Mtr.43116.1.S1_at   | Hypothetical protein                       | 4.19 |
| Msa.1216.1.S1_at    | Hypothetical protein                       | 4.18 |
| Mtr.9043.1.S1_at    | LS1-like protein                           | 4.18 |
| Mtr.13028.1.S1_at   | Hypothetical protein                       | 4.18 |
| Mtr.8508.1.S1_at    | Pectinesterase                             | 4.18 |
| Mtr.40167.1.S1_s_at | Phenylalanine ammonia-lyase                | 4.18 |
| Mtr.12208.1.S1_at   | Pentameric polyubiquitin                   | 4.18 |
| Mtr.37280.1.S1_s_at | Calcium-dependent protein kinase           | 4.17 |
| Mtr.12990.1.S1_at   | Nucleolar histone deacetylase              | 4.17 |
| Mtr.35141.1.S1_at   | Receptor-like serine/threonine kinase      | 4.17 |
| Mtr.14751.1.S1_at   | Ribosome-binding factor                    | 4.17 |
| Mtr.2604.1.S1_x_at  | Nodulin precursor                          | 4.17 |
| Mtr.27728.1.S1_s_at | Hypothetical protein                       | 4.17 |
| Mtr.45008.1.S1_at   | Receptor protein kinase like protein       | 4.17 |
| Mtr.21463.1.S1_at   | Cys-rich domain protein                    | 4.16 |
| Mtr.49199.1.S1_at   | Hypothetical protein                       | 4.16 |
| Mtr.4065.1.S1_at    | Hypothetical protein                       | 4.16 |
| Mtr.6366.1.S1_at    | Hypothetical protein                       | 4.15 |
| Mtr.11512.1.S1_at   | Hypothetical protein                       | 4.15 |
| Mtr.32808.1.S1_at   | Hypothetical protein                       | 4.15 |
| Mtr.9474.1.S1_at    | MLO-like protein                           | 4.15 |

|                     |                                       |      |
|---------------------|---------------------------------------|------|
| Mtr.31327.1.S1_at   | Protein kinase                        | 4.14 |
| Mtr.8994.1.S1_s_at  | Hypothetical protein                  | 4.14 |
| Mtr.36944.1.S1_at   | Hypothetical protein                  | 4.14 |
| Mtr.9291.1.S1_s_at  | Hypothetical protein                  | 4.13 |
| Mtr.45278.1.S1_s_at | Hypothetical protein                  | 4.13 |
| Mtr.11485.1.S1_at   | Imidazole glycerol phosphate synthase | 4.13 |
| Mtr.42387.1.S1_at   | Hypothetical protein                  | 4.13 |
| Mtr.39873.1.S1_s_at | Myb-like protein                      | 4.13 |
| Msa.1306.1.S1_at    | Hypothetical protein                  | 4.12 |
| Mtr.41196.1.S1_at   | Hypothetical protein                  | 4.12 |
| Mtr.35204.1.S1_at   | Glycine-rich protein                  | 4.12 |
| Mtr.32311.1.S1_at   | Dynein light chain 1                  | 4.12 |
| Mtr.13329.1.S1_at   | Hypothetical protein                  | 4.12 |
| Mtr.38757.1.S1_at   | Myb-related transcription factor      | 4.12 |
| Mtr.12293.1.S1_at   | Receptor protein kinase PERK-like     | 4.12 |
| Mtr.16505.1.S1_at   | Aldehyde dehydrogenase                | 4.11 |
| Mtr.8674.1.S1_at    | Serine/threonine protein phosphatase  | 4.11 |
| Mtr.43239.1.S1_at   | Avr9 elicitor response protein        | 4.11 |
| Mtr.39861.1.S1_at   | Ethylene response factor ERF1         | 4.11 |
| Msa.2974.1.S1_at    | Hypothetical protein                  | 4.11 |
| Mtr.31491.1.S1_s_at | Cellulose synthase-like protein       | 4.11 |
| Mtr.42911.1.S1_at   | RING zinc finger protein              | 4.11 |
| Mtr.7658.1.S1_at    | Hypothetical protein                  | 4.11 |
| Mtr.42944.1.S1_x_at | Extensin class 1 protein              | 4.11 |
| Msa.2736.1.S1_at    | Hypothetical protein                  | 4.11 |
| Mtr.38956.1.S1_at   | Hypothetical protein                  | 4.10 |
| Mtr.49055.1.S1_at   | Hypothetical protein                  | 4.10 |
| Mtr.42340.1.S1_at   | Importin alpha                        | 4.10 |
| Mtr.12229.1.S1_at   | RING zinc finger protein              | 4.10 |
| Mtr.14421.1.S1_at   | Hypothetical protein                  | 4.10 |
| Mtr.6366.1.S1_s_at  | Clathrin heavy chain                  | 4.10 |
| Mtr.42712.1.S1_at   | Mitochondrial carrier-like protein    | 4.10 |
| Mtr.38615.1.S1_at   | Hypothetical protein                  | 4.09 |
| Mtr.1430.1.S1_at    | Hypothetical protein                  | 4.09 |
| Mtr.6559.1.S1_at    | Hypothetical protein                  | 4.09 |
| Mtr.11252.1.S1_s_at | Receptor kinase-like protein          | 4.09 |
| Mtr.36943.1.S1_at   | Hypothetical protein                  | 4.08 |
| Mtr.45088.1.S1_at   | Vesicle transport v-SNARE 13          | 4.08 |
| Mtr.4189.1.S1_s_at  | Hypothetical protein                  | 4.08 |
| Mtr.49019.1.S1_at   | Glycoside hydrolase                   | 4.08 |
| Mtr.24415.1.S1_s_at | Alpha-amylase                         | 4.08 |
| Mtr.21310.1.S1_at   | Peptidase aspartic                    | 4.07 |
| Mtr.41557.1.S1_at   | Hypothetical protein                  | 4.07 |
| Mtr.37633.1.S1_at   | Allene oxide synthase                 | 4.07 |
| Mtr.9830.1.S1_at    | Expansin                              | 4.07 |
| Mtr.31741.1.S1_at   | WD repeat domain protein              | 4.07 |
| Msa.3087.1.S1_at    | Hypothetical protein                  | 4.06 |
| Mtr.34203.1.S1_at   | UDP-glucuronosyltransferase           | 4.06 |
| Mtr.38660.1.S1_at   | Hypothetical protein                  | 4.06 |
| Mtr.36887.1.S1_at   | Avr9/Cf-9 rapidly elicited protein    | 4.06 |
| Mtr.34860.1.S1_s_at | Ubiquitin-protein ligase              | 4.05 |
| Mtr.8471.1.S1_at    | Transport protein subunit             | 4.05 |
| Mtr.12559.1.S1_s_at | Glutathione S-transferase             | 4.05 |
| Mtr.40406.1.S1_at   | Hypothetical protein                  | 4.05 |



|                     |                                                   |      |
|---------------------|---------------------------------------------------|------|
| Mtr.35926.1.S1_s_at | Hypothetical protein                              | 4.05 |
| Mtr.21812.1.S1_at   | Hypothetical protein                              | 4.04 |
| Mtr.10766.1.S1_s_at | Amino acid permease                               | 4.04 |
| Mtr.10176.1.S1_at   | Hypothetical protein                              | 4.04 |
| Mtr.42547.1.S1_s_at | Respiratory burst oxidase homolog                 | 4.04 |
| Mtr.1398.1.S1_s_at  | Hypothetical protein                              | 4.03 |
| Mtr.44974.1.S1_at   | Skp1p-like protein                                | 4.03 |
| Mtr.27935.1.S1_s_at | Transcription factor WRKY4                        | 4.03 |
| Mtr.19170.1.S1_at   | Hypothetical protein                              | 4.03 |
| Mtr.29990.1.S1_at   | MYB-related protein                               | 4.03 |
| Mtr.20316.1.S1_at   | Purine/pyrimidine phosphoribosyl transferase      | 4.03 |
| Mtr.13259.1.S1_at   | Methylmalonate semi-aldehyde dehydrogenase        | 4.03 |
| Mtr.22118.1.S1_s_at | 5-enol-pyruvylshikimate-phosphate synthase        | 4.03 |
| Mtr.8632.1.S1_s_at  | Hypothetical protein                              | 4.03 |
| Mtr.38126.1.S1_at   | Hypothetical protein                              | 4.03 |
| Msa.2671.1.S1_s_at  | Hypothetical protein                              | 4.03 |
| Mtr.11232.1.S1_at   | Serine/threonine protein kinase                   | 4.03 |
| Mtr.9106.1.S1_at    | Hypothetical protein                              | 4.02 |
| Msa.2542.1.S1_at    | Hypothetical protein                              | 4.02 |
| Mtr.39021.1.S1_at   | AP2 domain transcription factor                   | 4.02 |
| Mtr.27354.1.S1_s_at | RPM1-interacting protein                          | 4.01 |
| Mtr.19347.1.S1_s_at | Hypothetical protein                              | 4.01 |
| Mtr.20265.1.S1_at   | Hypothetical protein                              | 4.01 |
| Mtr.320.1.S1_at     | 12-oxophytodienoic acid 10, 11-reductase          | 4.01 |
| Mtr.12449.1.S1_at   | Hypothetical protein                              | 4.00 |
| Mtr.29264.1.S1_at   | Isp4 like protein,                                | 4.00 |
| Mtr.4870.1.S1_s_at  | Hypothetical protein                              | 4.00 |
| Mtr.14494.1.S1_at   | Dihydroorotate dehydrogenase 1                    | 4.00 |
| Mtr.12609.1.S1_at   | Acyl CoA oxidase                                  | 4.00 |
| Mtr.18366.1.S1_at   | Curculin-like (mannose-binding) lectin            | 3.99 |
| Msa.1622.1.S1_at    | Hypothetical protein                              | 3.98 |
| Mtr.35611.1.S1_at   | Hypothetical protein                              | 3.98 |
| Mtr.40182.1.S1_at   | Hypothetical protein                              | 3.98 |
| Mtr.38837.1.S1_s_at | Hypothetical protein                              | 3.98 |
| Mtr.7556.1.S1_at    | AP2 domain containing protein                     | 3.98 |
| Mtr.9388.1.S1_at    | WRKY transcription factor                         | 3.98 |
| Mtr.31455.1.S1_at   | Hypothetical protein                              | 3.97 |
| Mtr.10773.1.S1_at   | Wasl protein                                      | 3.97 |
| Mtr.9041.1.S1_s_at  | Hypothetical protein                              | 3.97 |
| Mtr.12455.1.S1_at   | Hypothetical protein                              | 3.97 |
| Mtr.23965.1.S1_s_at | Wound-inducible protein                           | 3.97 |
| Mtr.37900.1.S1_at   | Pantothenate kinase 1 (Pantothenic acid kinase 1) | 3.97 |
| Mtr.41525.1.S1_at   | Hypothetical protein                              | 3.97 |
| Mtr.13594.1.S1_s_at | Lipase-like protein                               | 3.96 |
| Mtr.40005.1.S1_s_at | Hypothetical protein                              | 3.96 |
| Mtr.42525.1.S1_x_at | Hypothetical protein                              | 3.96 |
| Msa.1053.1.S1_at    | Hypothetical protein                              | 3.96 |
| Mtr.6963.1.S1_at    | Hypothetical protein                              | 3.95 |
| Mtr.46097.1.S1_at   | Hypothetical protein                              | 3.95 |
| Mtr.23686.1.S1_at   | DNA-directed RNA polymerase subunit               | 3.95 |
| Mtr.32957.1.S1_at   | Hypothetical protein                              | 3.95 |
| Mtr.50704.1.S1_s_at | Aldehyde dehydrogenase                            | 3.95 |
| Mtr.10325.1.S1_at   | Chitinase                                         | 3.95 |
| Mtr.19407.1.S1_at   | Hypothetical protein                              | 3.95 |

|                     |                                                |      |
|---------------------|------------------------------------------------|------|
| Mtr.15053.1.S1_at   | Thaumatococcus                                 | 3.94 |
| Mtr.20850.1.S1_at   | Zn-finger, DHHC type                           | 3.94 |
| Mtr.11633.1.S1_at   | Hypothetical protein                           | 3.94 |
| Mtr.16691.1.S1_at   | Myb, DNA-binding protein                       | 3.94 |
| Mtr.29288.1.S1_x_at | Hypothetical protein                           | 3.94 |
| Mtr.13696.1.S1_at   | Hypothetical protein                           | 3.94 |
| Mtr.7569.1.S1_at    | Cytosolic fructose-1,6-bisphosphatase          | 3.94 |
| Msa.1051.1.S1_at    | Hypothetical protein                           | 3.94 |
| Mtr.4569.1.S1_at    | Hypothetical protein                           | 3.93 |
| Mtr.9112.1.S1_at    | Steroid 22-alpha-hydroxylase                   | 3.93 |
| Mtr.28237.1.S1_s_at | Agenet domain-containing protein               | 3.93 |
| Mtr.35724.1.S1_at   | Hypothetical protein                           | 3.93 |
| Msa.1075.1.S1_at    | Hypothetical protein                           | 3.93 |
| Mtr.35925.1.S1_at   | Hypothetical protein                           | 3.93 |
| Mtr.38129.1.S1_at   | RNA-binding protein                            | 3.93 |
| Mtr.6906.1.S1_at    | Acyl-activating enzyme                         | 3.92 |
| Mtr.3105.1.S1_at    | PDR-type ABC transporter                       | 3.92 |
| Mtr.37020.1.S1_at   | NADH-ubiquinone oxidoreductase subunit         | 3.92 |
| Mtr.41259.1.S1_at   | Ring finger E3 ligase                          | 3.92 |
| Mtr.51646.1.S1_at   | Carbohydrate-binding, CenC-like protein        | 3.92 |
| Mtr.46408.1.S1_at   | Cytochrome P450                                | 3.92 |
| Msa.3043.1.S1_at    | Hypothetical protein                           | 3.91 |
| Mtr.43512.1.S1_at   | Hypothetical protein                           | 3.91 |
| Mtr.42782.1.S1_s_at | Hypothetical protein                           | 3.91 |
| Mtr.44169.1.S1_at   | Spermatid-specific protein                     | 3.90 |
| Mtr.48644.1.S1_at   | Hypothetical protein                           | 3.90 |
| Mtr.6797.1.S1_at    | Hypothetical protein                           | 3.90 |
| Mtr.12397.1.S1_at   | Cytochrome P450                                | 3.89 |
| Mtr.39871.1.S1_at   | Hypothetical protein                           | 3.89 |
| Mtr.31600.1.S1_at   | Hypothetical protein                           | 3.89 |
| Mtr.41814.1.S1_at   | PRIB5 protein                                  | 3.89 |
| Mtr.32948.1.S1_at   | Hypothetical protein                           | 3.89 |
| Mtr.457.1.S1_s_at   | Hypothetical protein                           | 3.89 |
| Mtr.10061.1.S1_at   | Hypothetical protein                           | 3.88 |
| Mtr.36255.1.S1_at   | Aquaporin-like transmembrane channel protein   | 3.88 |
| Mtr.40178.1.S1_at   | Hypothetical protein                           | 3.88 |
| Mtr.9139.1.S1_at    | Hypothetical protein                           | 3.88 |
| Mtr.11543.1.S1_at   | Gamma-glutamyl hydrolase                       | 3.88 |
| Mtr.6515.1.S1_at    | Dihydrodipicolinate synthase                   | 3.88 |
| Mtr.11396.1.S1_at   | Oxysterol-binding protein                      | 3.88 |
| Mtr.40876.1.S1_at   | Hypothetical protein                           | 3.88 |
| Mtr.38871.1.S1_at   | Hypothetical protein                           | 3.88 |
| Mtr.12425.1.S1_at   | Mitogen-activated protein kinase MMK2          | 3.88 |
| Mtr.10127.1.S1_at   | Phospholipase-like protein                     | 3.87 |
| Mtr.21466.1.S1_at   | Serine/threonine protein kinase                | 3.87 |
| Mtr.18298.1.S1_at   | Leucine-rich repeat                            | 3.87 |
| Mtr.1157.1.S1_s_at  | Hypothetical protein                           | 3.87 |
| Mtr.13216.1.S1_at   | Hypothetical protein                           | 3.87 |
| Mtr.46189.1.S1_s_at | Disease resistance protein                     | 3.86 |
| Mtr.38835.1.S1_at   | Cytochrome C biosynthesis heme-carrier protein | 3.86 |
| Mtr.11968.1.S1_at   | Alpha galactosidase                            | 3.86 |
| Mtr.43024.1.S1_at   | 6-phosphogluconate dehydrogenase               | 3.86 |
| Mtr.14019.1.S1_at   | LysM domain-containing receptor-like kinase    | 3.85 |
| Mtr.22597.1.S1_s_at | Serine decarboxylase                           | 3.85 |

|                     |                                                              |      |
|---------------------|--------------------------------------------------------------|------|
| Mtr.43455.1.S1_at   | Hypothetical protein                                         | 3.85 |
| Mtr.10389.1.S1_s_at | UDP-glucose 4-epimerase                                      | 3.85 |
| Mtr.7429.1.S1_s_at  | Hypothetical protein                                         | 3.85 |
| Mtr.2424.1.S1_at    | Nodulin-like protein                                         | 3.84 |
| Mtr.39061.1.S1_at   | Hypothetical protein                                         | 3.84 |
| Mtr.5877.1.S1_at    | Thioredoxin                                                  | 3.84 |
| Mtr.39061.1.S1_s_at | Hypothetical protein                                         | 3.84 |
| Mtr.50547.1.S1_at   | RHO protein GDP dissociation inhibitor                       | 3.84 |
| Mtr.20739.1.S1_s_at | Protein kinase                                               | 3.84 |
| Msa.2600.1.S1_at    | Hypothetical protein                                         | 3.84 |
| Mtr.28325.1.S1_at   | Branched-chain alpha-keto acid decarboxylase E1 beta subunit | 3.84 |
| Mtr.39422.1.S1_s_at | Hypothetical protein                                         | 3.83 |
| Mtr.12664.1.S1_at   | Hypothetical protein                                         | 3.83 |
| Mtr.42955.1.S1_at   | Cytochrome P450 76C4                                         | 3.83 |
| Mtr.12402.1.S1_s_at | Beta-galactosidase                                           | 3.82 |
| Mtr.43104.1.S1_at   | 1-aminocyclopropanecarboxylic acid oxidase                   | 3.82 |
| Mtr.8701.1.S1_at    | Leucine rich repeat protein                                  | 3.82 |
| Mtr.11018.1.S1_s_at | Hypothetical protein                                         | 3.82 |
| Mtr.33274.1.S1_at   | Hypothetical protein                                         | 3.82 |
| Mtr.18069.1.S1_x_at | Disease resistance protein                                   | 3.81 |
| Msa.1174.1.S1_at    | Hypothetical protein                                         | 3.81 |
| Mtr.17868.1.S1_at   | Hypothetical protein                                         | 3.81 |
| Mtr.42180.1.S1_s_at | Hypothetical protein                                         | 3.81 |
| Mtr.44105.1.S1_at   | Nucleolar RNA-binding Nop10p-like protein                    | 3.81 |
| Mtr.10806.1.S1_at   | Hypothetical protein                                         | 3.81 |
| Mtr.50038.1.S1_at   | No apical meristem (NAM) protein                             | 3.81 |
| Mtr.13624.1.S1_at   | Hypothetical protein                                         | 3.81 |
| Mtr.33257.1.S1_s_at | Stromal membrane-associated protein                          | 3.80 |
| Mtr.35045.1.S1_s_at | Rab escort protein                                           | 3.80 |
| Mtr.5717.1.S1_at    | Receptor protein kinase                                      | 3.80 |
| Mtr.20156.1.S1_s_at | Hypothetical protein                                         | 3.80 |
| Msa.2746.1.S1_at    | Hypothetical protein                                         | 3.80 |
| Mtr.49088.1.S1_at   | Rhodanese-like protein                                       | 3.79 |
| Mtr.41349.1.S1_s_at | Hydrolase                                                    | 3.79 |
| Mtr.23865.1.S1_at   | Putative disease resistance protein                          | 3.79 |
| Mtr.18642.1.S1_at   | Hypothetical protein                                         | 3.79 |
| Mtr.12210.1.S1_at   | Acyl carrier protein                                         | 3.79 |
| Mtr.8642.1.S1_at    | Serine palmitoyltransferase                                  | 3.79 |
| Mtr.21812.1.S1_s_at | Hypothetical protein                                         | 3.79 |
| Mtr.17962.1.S1_at   | DNA-binding WRKY                                             | 3.78 |
| Mtr.47843.1.S1_at   | Monosaccharide transporter                                   | 3.78 |
| Mtr.27641.1.S1_at   | Hypothetical protein                                         | 3.78 |
| Mtr.26307.1.S1_at   | GDSL-motif lipase/hydrolase protein                          | 3.77 |
| Mtr.51442.1.S1_at   | Protein kinase                                               | 3.77 |
| Mtr.40538.1.S1_at   | Glutamate decarboxylase                                      | 3.77 |
| Mtr.5966.1.S1_at    | Class III peroxidase                                         | 3.77 |
| Mtr.7323.1.S1_at    | Hypothetical protein                                         | 3.76 |
| Mtr.37312.1.S1_at   | Heat shock protein 70-3                                      | 3.76 |
| Msa.2767.1.S1_at    | Hypothetical protein                                         | 3.76 |
| Mtr.10581.1.S1_at   | Hypothetical protein                                         | 3.76 |
| Mtr.30738.1.S1_at   | Uracil phosphoribosyltransferase                             | 3.76 |
| Mtr.27778.1.S1_at   | Serine/threonine protein kinase                              | 3.75 |
| Mtr.9182.1.S1_at    | Hypothetical protein                                         | 3.75 |
| Mtr.13273.1.S1_at   | TINY-like protein                                            | 3.75 |

|                     |                                                        |      |
|---------------------|--------------------------------------------------------|------|
| Mtr.45463.1.S1_at   | Xyloglucan endotransglucosylase/hydrolase protein      | 3.75 |
| Mtr.47022.1.S1_s_at | Wound-inducible protein                                | 3.75 |
| Mtr.43073.1.S1_s_at | Poly(A)-binding protein C-terminal interacting protein | 3.74 |
| Mtr.44365.1.S1_s_at | Adenine-specific DNA modification methyltransferase    | 3.74 |
| Mtr.19347.1.S1_at   | Major intrinsic protein                                | 3.74 |
| Mtr.29288.1.S1_at   | Hypothetical protein                                   | 3.74 |
| Mtr.10514.1.S1_at   | Acyl-activating enzyme                                 | 3.74 |
| Mtr.33285.1.S1_at   | Hypothetical protein                                   | 3.74 |
| Mtr.33152.1.S1_at   | Hypothetical protein                                   | 3.74 |
| Mtr.49556.1.S1_at   | RNA polymerase                                         | 3.74 |
| Mtr.30654.1.S1_at   | Hypothetical protein                                   | 3.73 |
| Mtr.37655.1.S1_at   | Nucleolar histone deacetylase                          | 3.73 |
| Mtr.43192.1.S1_at   | Mature anther-specific protein                         | 3.73 |
| Mtr.44922.1.S1_at   | Glycine-rich protein                                   | 3.73 |
| Mtr.14729.1.S1_at   | RNA-processing protein                                 | 3.73 |
| Mtr.37225.1.S1_at   | Adenine nucleotide translocator                        | 3.73 |
| Mtr.40099.1.S1_at   | Hypothetical protein                                   | 3.72 |
| Mtr.42149.1.S1_at   | Hypothetical protein                                   | 3.72 |
| Mtr.10779.1.S1_at   | Chalcone-flavonone isomerase                           | 3.72 |
| Mtr.45140.1.S1_at   | ABI3 family regulatory protein                         | 3.72 |
| Mtr.40144.1.S1_at   | Glutamate-rich protein                                 | 3.72 |
| Mtr.35913.1.S1_at   | Integral membrane protein                              | 3.72 |
| Msa.1472.1.S1_at    | Hypothetical protein                                   | 3.71 |
| Mtr.5571.1.S1_s_at  | Hypothetical protein                                   | 3.71 |
| Mtr.39083.1.S1_at   | Proliferating-cell nucleolar protein                   | 3.71 |
| Mtr.40058.1.S1_x_at | Nodulin                                                | 3.71 |
| Mtr.42944.1.S1_a_at | Extensin class 1 protein                               | 3.70 |
| Mtr.7448.1.S1_s_at  | Hypothetical protein                                   | 3.70 |
| Mtr.33339.1.S1_at   | Hypothetical protein                                   | 3.70 |
| Mtr.45117.1.S1_at   | Guanylate kinase                                       | 3.70 |
| Mtr.43355.1.S1_at   | Hypothetical protein                                   | 3.70 |
| Mtr.32291.1.S1_at   | GTP cyclohydrolase II                                  | 3.70 |
| Mtr.33361.1.S1_at   | Hypothetical protein                                   | 3.70 |
| Msa.1942.1.S1_at    | Hypothetical protein                                   | 3.69 |
| Mtr.6979.1.S1_s_at  | Glyceraldehyde-3-phosphate dehydrogenase               | 3.69 |
| Mtr.40977.1.S1_at   | Hypothetical protein                                   | 3.69 |
| Mtr.9523.1.S1_at    | Hypothetical protein                                   | 3.69 |
| Mtr.39540.1.S1_at   | ABC transporter                                        | 3.69 |
| Mtr.12378.1.S1_at   | Serine/threonine-protein kinase                        | 3.69 |
| Mtr.35813.1.S1_at   | Hypothetical protein                                   | 3.68 |
| Mtr.50388.1.S1_at   | TPR repeat protein                                     | 3.68 |
| Mtr.41051.1.S1_at   | Hypothetical protein                                   | 3.68 |
| Mtr.2254.1.S1_at    | Hypothetical protein                                   | 3.68 |
| Mtr.10338.1.S1_s_at | Hypothetical protein                                   | 3.68 |
| Mtr.16703.1.S1_at   | Disease resistance protein                             | 3.67 |
| Mtr.9399.1.S1_at    | CDPK-related protein kinase                            | 3.67 |
| Mtr.10728.1.S1_at   | Hypothetical protein                                   | 3.67 |
| Mtr.8658.1.S1_at    | Dehydroquinate synthase                                | 3.67 |
| Mtr.12698.1.S1_at   | Hypothetical protein                                   | 3.67 |
| Mtr.42147.1.S1_at   | Intracellular pathogenesis related protein             | 3.67 |
| Mtr.12597.1.S1_at   | TIR-NBS-LRR type R protein                             | 3.67 |
| Mtr.41733.1.S1_at   | Hypothetical protein                                   | 3.66 |
| Mtr.44772.1.S1_at   | Probable elongation factor G                           | 3.66 |
| Mtr.50050.1.S1_at   | Isopenicillin N synthetase                             | 3.66 |

|                     |                                                            |      |
|---------------------|------------------------------------------------------------|------|
| Mtr.45354.1.S1_at   | Whitefly-induced gp91-phox                                 | 3.66 |
| Mtr.3871.1.S1_at    | CCAAT-box-binding transcription factor-like protein        | 3.66 |
| Mtr.31548.1.S1_at   | Metacaspase                                                | 3.66 |
| Mtr.37495.1.S1_at   | SCOF-1                                                     | 3.66 |
| Mtr.10565.1.S1_at   | Hypothetical protein                                       | 3.66 |
| Mtr.18344.1.S1_at   | Protein kinase                                             | 3.65 |
| Mtr.37260.1.S1_at   | Agenet domain-containing protein                           | 3.65 |
| Msa.2783.1.S1_at    | Hypothetical protein                                       | 3.64 |
| Mtr.50583.1.S1_at   | Glycoside hydrolase                                        | 3.64 |
| Mtr.45507.1.S1_at   | Hypothetical protein                                       | 3.64 |
| Mtr.1676.1.S1_at    | Hypothetical protein                                       | 3.64 |
| Msa.2622.1.S1_at    | Hypothetical protein                                       | 3.64 |
| Mtr.43169.1.S1_at   | Hypothetical protein                                       | 3.64 |
| Mtr.23261.1.S1_at   | Hypothetical protein                                       | 3.63 |
| Mtr.37972.1.S1_at   | Hypothetical protein                                       | 3.63 |
| Mtr.41809.1.S1_s_at | Non-phototropic hypocotyl protein                          | 3.63 |
| Mtr.37928.1.S1_at   | Thiamine pyrophosphokinase                                 | 3.63 |
| Mtr.8933.1.S1_at    | 1,2-dioxygenase                                            | 3.63 |
| Mtr.41172.1.S1_s_at | Hypothetical protein                                       | 3.62 |
| Mtr.13267.1.S1_at   | Hypothetical protein                                       | 3.62 |
| Mtr.10621.1.S1_at   | Hypothetical protein                                       | 3.62 |
| Mtr.13077.1.S1_at   | Hypothetical protein                                       | 3.62 |
| Mtr.14663.1.S1_at   | Major intrinsic protein                                    | 3.62 |
| Mtr.9656.1.S1_at    | Response regulator protein                                 | 3.62 |
| Mtr.44555.1.S1_at   | Amino acid permease-like protein                           | 3.62 |
| Mtr.23049.1.S1_at   | Hypothetical protein                                       | 3.62 |
| Mtr.50422.1.S1_at   | Hypothetical protein                                       | 3.62 |
| Mtr.29715.1.S1_at   | Hypothetical protein                                       | 3.62 |
| Mtr.22662.1.S1_at   | NADP-dependent malic enzyme                                | 3.62 |
| Mtr.320.1.S1_x_at   | 12-oxophytodienoic acid 10, 11-reductase                   | 3.62 |
| Mtr.11114.1.S1_at   | Hypothetical protein                                       | 3.62 |
| Mtr.33096.1.S1_at   | Heterogeneous nuclear ribonucleoprotein A2/B1-like protein | 3.62 |
| Mtr.14627.1.S1_at   | Hypothetical protein                                       | 3.61 |
| Mtr.34632.1.S1_s_at | Seven transmembrane helix receptor                         | 3.61 |
| Mtr.35440.1.S1_at   | Hypothetical protein                                       | 3.61 |
| Mtr.31454.1.S1_s_at | Hypothetical protein                                       | 3.61 |
| Mtr.3533.1.S1_at    | Hypothetical protein                                       | 3.61 |
| Mtr.51889.1.S1_s_at | Peptidase                                                  | 3.61 |
| Mtr.18402.1.S1_at   | Hypothetical protein                                       | 3.61 |
| Mtr.43658.1.S1_at   | Hypothetical protein                                       | 3.61 |
| Mtr.41781.1.S1_at   | Cell cycle serine/threonine-protein kinase                 | 3.60 |
| Mtr.35741.1.S1_at   | Hypothetical protein                                       | 3.60 |
| Mtr.4934.1.S1_s_at  | Hypothetical protein                                       | 3.60 |
| Mtr.35008.1.S1_at   | RNA polymerase                                             | 3.60 |
| Mtr.9697.1.S1_at    | Hypothetical protein                                       | 3.60 |
| Mtr.39049.1.S1_at   | WD40-repeat protein                                        | 3.60 |
| Mtr.13010.1.S1_at   | Xyloglucan endotransglucosylase/hydrolase protein          | 3.59 |
| Mtr.11175.1.S1_at   | Hypothetical protein                                       | 3.59 |
| Mtr.36256.1.S1_at   | Hypothetical protein                                       | 3.59 |
| Mtr.24415.1.S1_at   | Alpha-amylase                                              | 3.59 |
| Mtr.46918.1.S1_at   | Hypothetical protein                                       | 3.59 |
| Mtr.4379.1.S1_at    | Hypothetical protein                                       | 3.59 |
| Mtr.45568.1.S1_at   | Phosphate transporter                                      | 3.59 |
| Mtr.44462.1.S1_at   | Heat shock protein                                         | 3.59 |

|                     |                                                |      |
|---------------------|------------------------------------------------|------|
| Mtr.20117.1.S1_s_at | Peptidyl-prolyl cis-trans isomerase            | 3.59 |
| Mtr.8589.1.S1_at    | Cinnamyl-alcohol dehydrogenase (CAD)           | 3.58 |
| Mtr.51829.1.S1_at   | Response regulator receiver                    | 3.58 |
| Mtr.31755.1.S1_at   | Diacylglycerol kinase                          | 3.58 |
| Mtr.36311.1.S1_at   | Hypothetical protein                           | 3.58 |
| Mtr.31337.1.S1_at   | Serine/threonine kinase                        | 3.58 |
| Mtr.38691.1.S1_s_at | Hypothetical protein                           | 3.58 |
| Mtr.7950.1.S1_at    | Receptor protein kinase                        | 3.58 |
| Mtr.15228.1.S1_s_at | Pre-mRNA processing ribonucleoprotein          | 3.58 |
| Mtr.33544.1.S1_at   | Beta-galactosidase                             | 3.58 |
| Mtr.42855.1.S1_s_at | Plastidic ATP/ADP transporter                  | 3.58 |
| Mtr.38362.1.S1_at   | Anthranilate N-benzoyltransferase-like protein | 3.58 |
| Mtr.25254.1.S1_at   | DnaJ-like protein                              | 3.58 |
| Mtr.33133.1.S1_at   | IRE homolog; protein kinase-like protein       | 3.58 |
| Mtr.267.1.S1_at     | Hypothetical protein                           | 3.58 |
| Mtr.33601.1.S1_s_at | Nodulin26-like major intrinsic protein         | 3.57 |
| Mtr.23284.1.S1_at   | Calcium-binding EF-hand family protein         | 3.57 |
| Mtr.8606.1.S1_at    | O-methyltransferase                            | 3.57 |
| Mtr.37994.1.S1_at   | Protein kinase                                 | 3.56 |
| Mtr.42023.1.S1_at   | Lipase                                         | 3.56 |
| Mtr.41029.1.S1_s_at | Ankyrin repeat-containing protein              | 3.56 |
| Mtr.41703.1.S1_at   | Lipoxygenase                                   | 3.55 |
| Mtr.32533.1.S1_s_at | Hypothetical protein                           | 3.55 |
| Mtr.49896.1.S1_at   | Hypothetical protein                           | 3.55 |
| Mtr.40241.1.S1_at   | Cinnamoyl-CoA reductase                        | 3.55 |
| Mtr.46756.1.S1_s_at | Hypothetical protein                           | 3.55 |
| Mtr.32998.1.S1_s_at | Hypothetical protein                           | 3.55 |
| Mtr.7754.1.S1_s_at  | Vestitone reductase                            | 3.55 |
| Mtr.11202.1.S1_s_at | Hypothetical protein                           | 3.55 |
| Mtr.12684.1.S1_at   | Hypothetical protein                           | 3.54 |
| Mtr.32531.1.S1_s_at | Hypothetical protein                           | 3.54 |
| Mtr.4454.1.S1_at    | Hypothetical protein                           | 3.54 |
| Mtr.9950.1.S1_at    | Hypothetical protein                           | 3.54 |
| Mtr.35093.1.S1_at   | Hypothetical protein                           | 3.54 |
| Mtr.5263.1.S1_at    | Hypothetical protein                           | 3.54 |
| Mtr.11200.1.S1_at   | Zinc finger protein                            | 3.54 |
| Mtr.13938.1.S1_at   | Mei2-like protein                              | 3.54 |
| Mtr.6484.1.S1_at    | Phosphate transporter                          | 3.54 |
| Mtr.47490.1.S1_s_at | Cytochrome P450 71D9                           | 3.54 |
| Mtr.9792.1.S1_at    | Phage-type RNA polymerase                      | 3.54 |
| Mtr.9002.1.S1_at    | 1-aminocyclopropane-1-carboxylic acid oxidase  | 3.54 |
| Mtr.4815.1.S1_at    | Hypothetical protein                           | 3.54 |
| Mtr.30502.1.S1_at   | Hypothetical protein                           | 3.54 |
| Mtr.18525.1.S1_at   | Pyridoxal-dependent decarboxylase              | 3.53 |
| Mtr.38894.1.S1_s_at | Hypothetical protein                           | 3.53 |
| Mtr.42610.1.S1_at   | Acyl-activating enzyme                         | 3.53 |
| Mtr.9525.1.S1_at    | Hypothetical protein                           | 3.53 |
| Mtr.33223.1.S1_x_at | Anionic Peroxidase                             | 3.53 |
| Mtr.46966.1.S1_s_at | Wound-induced GSK-3-like protein               | 3.53 |
| Mtr.44444.1.S1_at   | MADS box interactor-like protein               | 3.52 |
| Mtr.3066.1.S1_s_at  | Hypothetical protein                           | 3.52 |
| Msa.2535.1.S1_at    | Hypothetical protein                           | 3.52 |
| Mtr.45145.1.S1_s_at | Lipase class 3-like                            | 3.52 |
| Mtr.16393.1.S1_at   | Hypothetical protein                           | 3.52 |

|                     |                                                              |      |
|---------------------|--------------------------------------------------------------|------|
| Mtr.28948.1.S1_at   | Hypothetical protein                                         | 3.52 |
| Mtr.28840.1.S1_at   | Hypothetical protein                                         | 3.52 |
| Mtr.41270.1.S1_at   | Beta-adaptin-like protein A                                  | 3.52 |
| Mtr.40735.1.S1_at   | Hypothetical protein                                         | 3.52 |
| Mtr.45225.1.S1_at   | Ankyrin-like protein                                         | 3.52 |
| Msa.1474.1.S1_at    | Hypothetical protein                                         | 3.52 |
| Msa.2952.1.S1_at    | Hypothetical protein                                         | 3.51 |
| Mtr.40307.1.S1_at   | Citrate synthase                                             | 3.51 |
| Mtr.13389.1.S1_at   | Receptor protein kinase                                      | 3.51 |
| Mtr.8444.1.S1_s_at  | Hypothetical protein                                         | 3.51 |
| Mtr.46539.1.S1_at   | bZIP DNA-binding protein                                     | 3.51 |
| Mtr.692.1.S1_at     | Hypothetical protein                                         | 3.51 |
| Mtr.32061.1.S1_at   | Hypothetical protein                                         | 3.51 |
| Mtr.41853.1.S1_at   | Zinc finger, C3HC4 type protein                              | 3.51 |
| Mtr.10147.1.S1_at   | Auxin-induced SAUR-like protein                              | 3.50 |
| Mtr.2533.1.S1_at    | Hypothetical protein                                         | 3.50 |
| Mtr.9055.1.S1_at    | Branched-chain alpha-keto acid decarboxylase E1 beta subunit | 3.50 |
| Mtr.28090.1.S1_at   | Hypothetical protein                                         | 3.50 |
| Mtr.44992.1.S1_s_at | Serine/threonine protein kinase                              | 3.50 |
| Mtr.45647.1.S1_at   | Amidase                                                      | 3.50 |
| Mtr.12962.1.S1_at   | Rho GDP dissociation inhibitor 2                             | 3.50 |
| Mtr.37677.1.S1_s_at | Hypothetical protein                                         | 3.50 |
| Mtr.44887.1.S1_at   | Hypothetical protein                                         | 3.50 |
| Mtr.21028.1.S1_at   | Hypothetical protein                                         | 3.50 |
| Mtr.31290.1.S1_at   | NHL repeat-containing protein                                | 3.50 |
| Mtr.50930.1.S1_at   | Helix-loop-helix DNA-binding protein                         | 3.50 |
| Mtr.44211.1.S1_at   | Hypothetical protein                                         | 3.49 |
| Mtr.38258.1.S1_at   | Peroxisomal acetoacetyl-coenzyme A thiolase                  | 3.49 |
| Mtr.36196.1.S1_s_at | Lipase-like protein                                          | 3.49 |
| Mtr.34124.1.S1_at   | ARF GAP-like zinc finger-containing protein                  | 3.49 |
| Mtr.1526.1.S1_at    | Hypothetical protein                                         | 3.49 |
| Mtr.47932.1.S1_at   | Xylulose kinase                                              | 3.48 |
| Mtr.10342.1.S1_at   | Xyloglucan endotransglucosylase/hydrolase protein            | 3.48 |
| Mtr.43390.1.S1_at   | Hypothetical protein                                         | 3.48 |
| Mtr.44614.1.S1_at   | Hypothetical protein                                         | 3.48 |
| Mtr.44647.1.S1_at   | DNA/RNA binding protein                                      | 3.47 |
| Mtr.428.1.S1_s_at   | Leucine rich repeat protein family                           | 3.47 |
| Mtr.13769.1.S1_at   | Exonuclease-like protein                                     | 3.47 |
| Mtr.30741.1.S1_at   | Allantoin permease                                           | 3.46 |
| Msa.1220.1.S1_at    | Hypothetical protein                                         | 3.46 |
| Msa.3071.1.S1_at    | Hypothetical protein                                         | 3.46 |
| Mtr.23415.1.S1_at   | Hypothetical protein                                         | 3.46 |
| Mtr.12342.1.S1_at   | bHLH transcription factor                                    | 3.46 |
| Mtr.37612.1.S1_at   | Hypothetical protein                                         | 3.46 |
| Mtr.33353.1.S1_at   | Microtubule-associated protein                               | 3.46 |
| Mtr.39204.1.S1_at   | Hypothetical protein                                         | 3.45 |
| Mtr.9031.1.S1_at    | Nucellin-like aspartic protease                              | 3.45 |
| Mtr.38626.1.S1_at   | Fumarate hydratase                                           | 3.45 |
| Msa.1176.1.S1_at    | Hypothetical protein                                         | 3.45 |
| Mtr.3889.1.S1_at    | Hypothetical protein                                         | 3.45 |
| Mtr.7267.1.S1_at    | Hypothetical protein                                         | 3.45 |
| Mtr.8704.1.S1_at    | Hypothetical protein                                         | 3.45 |
| Mtr.49932.1.S1_at   | Ankyrin protein                                              | 3.44 |
| Mtr.45496.1.S1_at   | Profilin                                                     | 3.44 |

|                     |                                             |      |
|---------------------|---------------------------------------------|------|
| Mtr.41441.1.S1_at   | Hypothetical protein                        | 3.44 |
| Mtr.10725.1.S1_at   | Basic blue copper protein                   | 3.44 |
| Mtr.6886.1.S1_at    | Hypothetical protein                        | 3.44 |
| Mtr.1233.1.S1_at    | KAP-2                                       | 3.44 |
| Mtr.18695.1.S1_at   | Hypothetical protein                        | 3.44 |
| Mtr.37771.1.S1_at   | Ser/Thr protein kinase                      | 3.44 |
| Mtr.42269.1.S1_at   | Transcription factor (E2F)                  | 3.44 |
| Mtr.51028.1.S1_at   | Aspartate/glutamate/uridylylate kinase      | 3.44 |
| Mtr.38070.1.S1_at   | Hypothetical protein                        | 3.44 |
| Mtr.49905.1.S1_at   | Hypothetical protein                        | 3.43 |
| Mtr.32218.1.S1_s_at | Hypothetical protein                        | 3.43 |
| Mtr.24467.1.S1_s_at | Hypothetical protein                        | 3.43 |
| Mtr.37913.1.S1_at   | Acyl-CoA oxidase                            | 3.43 |
| Mtr.5083.1.S1_at    | Hypothetical protein                        | 3.43 |
| Mtr.15650.1.S1_s_at | Adenylate kinase                            | 3.43 |
| Mtr.39683.1.S1_at   | Hypothetical protein                        | 3.43 |
| Mtr.41760.1.S1_at   | Calcium-dependent protein kinase            | 3.43 |
| Mtr.10536.1.S1_at   | Omega-3 fatty acid desaturase               | 3.42 |
| Mtr.13482.1.S1_at   | Ceramide kinase                             | 3.42 |
| Mtr.13565.1.S1_at   | Hypothetical protein                        | 3.42 |
| Mtr.34768.1.S1_at   | Hypothetical protein                        | 3.42 |
| Mtr.43957.1.S1_s_at | Peroxisomal copper-containing amine oxidase | 3.42 |
| Mtr.27800.1.S1_s_at | Synptobrevin-related protein                | 3.42 |
| Mtr.17544.1.S1_at   | Hypothetical protein                        | 3.41 |
| Mtr.17714.1.S1_at   | Pentatricopeptide repeat protein            | 3.41 |
| Mtr.36788.1.S1_at   | Hypothetical protein                        | 3.41 |
| Mtr.47465.1.S1_at   | Nitrate transporter                         | 3.41 |
| Mtr.41373.1.S1_at   | Phi-1-like protein                          | 3.41 |
| Mtr.2735.1.S1_at    | Hypothetical protein                        | 3.40 |
| Mtr.7227.1.S1_at    | Hypothetical protein                        | 3.40 |
| Mtr.16634.1.S1_s_at | Hypothetical protein                        | 3.40 |
| Mtr.50478.1.S1_at   | Phenylalanine/histidine ammonia-lyase       | 3.40 |
| Mtr.11076.1.S1_at   | Hypothetical protein                        | 3.40 |
| Mtr.48868.1.S1_at   | Phosphofructokinase                         | 3.40 |
| Mtr.40131.1.S1_at   | Peroxidase                                  | 3.40 |
| Mtr.42359.1.S1_at   | Hypothetical protein                        | 3.40 |
| Mtr.45896.1.S1_at   | Translation initiation factor               | 3.40 |
| Mtr.10349.1.S1_s_at | Hypothetical protein                        | 3.40 |
| Msa.969.1.S1_at     | Hypothetical protein                        | 3.39 |
| Mtr.4041.1.S1_at    | Nucleic acid binding protein                | 3.39 |
| Mtr.39314.1.S1_at   | Hypothetical protein                        | 3.39 |
| Mtr.38570.1.S1_at   | YGL010w-like protein                        | 3.39 |
| Mtr.13667.1.S1_at   | Hypothetical protein                        | 3.39 |
| Mtr.10240.1.S1_at   | Hypothetical protein                        | 3.39 |
| Mtr.40592.1.S1_at   | Ferredoxin III                              | 3.39 |
| Mtr.5343.1.S1_s_at  | Type-A response regulator                   | 3.39 |
| Mtr.48412.1.S1_s_at | Beta-galactosidase                          | 3.39 |
| Mtr.10224.1.S1_at   | MYB-like DNA-binding domain protein         | 3.39 |
| Mtr.28849.1.S1_at   | Amidase-like protein                        | 3.38 |
| Mtr.49094.1.S1_at   | Peptidase aspartic                          | 3.38 |
| Mtr.48411.1.S1_s_at | Beta-galactosidase                          | 3.38 |
| Mtr.43608.1.S1_at   | rRNA processing protein                     | 3.38 |
| Mtr.20288.1.S1_at   | Transcriptional factor B3                   | 3.38 |
| Mtr.38966.1.S1_at   | Ser/Thr kinase                              | 3.38 |



|                     |                                            |      |
|---------------------|--------------------------------------------|------|
| Mtr.42391.1.S1_at   | Hypothetical protein                       | 3.38 |
| Mtr.648.1.S1_at     | Peptide transporter                        | 3.38 |
| Mtr.12830.1.S1_at   | Hypothetical protein                       | 3.38 |
| Mtr.38304.1.S1_at   | Hypothetical protein                       | 3.38 |
| Mtr.35791.1.S1_s_at | Light-induced protein                      | 3.38 |
| Mtr.13806.1.S1_at   | Hypothetical protein                       | 3.38 |
| Mtr.45833.1.S1_s_at | Hypothetical protein                       | 3.38 |
| Mtr.47703.1.S1_at   | Hypothetical protein                       | 3.38 |
| Mtr.11878.1.S1_at   | Receptor protein kinase                    | 3.38 |
| Mtr.45297.1.S1_at   | Hypothetical protein                       | 3.37 |
| Mtr.32889.1.S1_at   | Hypothetical protein                       | 3.37 |
| Mtr.45545.1.S1_at   | Hypothetical protein                       | 3.37 |
| Mtr.40801.1.S1_at   | Hypothetical protein                       | 3.37 |
| Mtr.37280.1.S1_at   | Calcium-dependent protein kinase           | 3.37 |
| Mtr.30161.1.S1_s_at | Basic/leucine zipper protein               | 3.37 |
| Mtr.10542.1.S1_at   | Hypothetical protein                       | 3.37 |
| Mtr.28411.1.S1_s_at | Hypothetical protein                       | 3.37 |
| Mtr.16216.1.S1_at   | Serine/threonine protein kinase            | 3.37 |
| Mtr.41875.1.S1_at   | Receptor protein kinase                    | 3.37 |
| Mtr.33279.1.S1_at   | Aux/IAA                                    | 3.37 |
| Mtr.2238.1.S1_s_at  | Repetitive proline-rich cell wall protein  | 3.36 |
| Mtr.44661.1.S1_at   | Hypothetical protein                       | 3.36 |
| Mtr.39602.1.S1_at   | Receptor protein kinase                    | 3.36 |
| Mtr.42760.1.S1_at   | Hypothetical protein                       | 3.36 |
| Mtr.30257.1.S1_at   | Hypothetical protein                       | 3.36 |
| Mtr.9028.1.S1_at    | Hypothetical protein                       | 3.36 |
| Mtr.12920.1.S1_s_at | MAP kinase-like protein                    | 3.36 |
| Mtr.21815.1.S1_at   | 2OG-Fe(II) oxygenase                       | 3.36 |
| Mtr.2218.1.S1_at    | Ubiquitin-protein ligase                   | 3.36 |
| Mtr.11557.1.S1_at   | Hypothetical protein                       | 3.36 |
| Mtr.50292.1.S1_at   | Hypothetical protein                       | 3.36 |
| Mtr.45259.1.S1_at   | LEM3-like protein                          | 3.36 |
| Mtr.43597.1.S1_at   | Hypothetical protein                       | 3.35 |
| Mtr.32122.1.S1_at   | Cellulose synthase-like protein            | 3.35 |
| Mtr.39259.1.S1_at   | Hypothetical protein                       | 3.35 |
| Msa.1908.1.S1_at    | Hypothetical protein                       | 3.35 |
| Mtr.14930.1.S1_at   | Hypothetical protein                       | 3.35 |
| Mtr.47863.1.S1_s_at | Transcription factor WRKY10                | 3.35 |
| Mtr.2249.1.S1_at    | Hypothetical protein                       | 3.35 |
| Mtr.30756.1.S1_s_at | Hypothetical protein                       | 3.35 |
| Mtr.4322.1.S1_at    | Cytochrome oxidase subunit III             | 3.35 |
| Mtr.38935.1.S1_at   | Myo-inositol transporter 1                 | 3.35 |
| Mtr.38752.1.S1_at   | Geranyl diphosphate synthase small subunit | 3.35 |
| Mtr.5770.1.S1_at    | Endo-1,3-beta-glucanase                    | 3.34 |
| Mtr.29332.1.S1_s_at | Hypothetical protein                       | 3.34 |
| Mtr.44448.1.S1_at   | Poly(A)-binding protein                    | 3.34 |
| Mtr.51701.1.S1_s_at | Cyclin-like F-box protein                  | 3.34 |
| Mtr.39520.1.S1_at   | Hypothetical protein                       | 3.34 |
| Mtr.19212.1.S1_at   | Hypothetical protein                       | 3.34 |
| Mtr.39646.1.S1_at   | Receptor-like protein kinase               | 3.34 |
| Mtr.20124.1.S1_at   | Serine/threonine protein kinase            | 3.34 |
| Mtr.17399.1.S1_at   | Peptidylprolyl isomerase, FKBP-type        | 3.34 |
| Mtr.40132.1.S1_at   | Peroxidase I                               | 3.34 |
| Mtr.21871.1.S1_at   | Hypothetical protein                       | 3.34 |

|                     |                                             |      |
|---------------------|---------------------------------------------|------|
| Mtr.34899.1.S1_at   | Hexose carrier protein                      | 3.34 |
| Mtr.50207.1.S1_s_at | Hypothetical protein                        | 3.33 |
| Mtr.13244.1.S1_at   | Hypothetical protein                        | 3.33 |
| Mtr.50554.1.S1_at   | Hypothetical protein                        | 3.33 |
| Mtr.10425.1.S1_at   | Ethylene responsive element binding factor  | 3.33 |
| Mtr.34874.1.S1_s_at | Dolichyl-phosphate beta-glucosyltransferase | 3.33 |
| Mtr.37773.1.S1_at   | GDSL-motif lipase/hydrolase-like protein    | 3.33 |
| Mtr.10867.1.S1_at   | Expansin-like protein                       | 3.33 |
| Mtr.10633.1.S1_at   | Hypothetical protein                        | 3.32 |
| Mtr.9389.1.S1_at    | DNA-binding protein RAV1                    | 3.32 |
| Mtr.27919.1.S1_at   | Hypothetical protein                        | 3.32 |
| Mtr.49246.1.S1_at   | Zn-finger, MYND type                        | 3.32 |
| Mtr.17691.1.S1_at   | Transcriptional factor                      | 3.32 |
| Mtr.29056.1.S1_at   | Hypothetical protein                        | 3.32 |
| Mtr.42872.1.S1_at   | Hypothetical protein                        | 3.32 |
| Msa.3067.1.S1_at    | Hypothetical protein                        | 3.32 |
| Mtr.13557.1.S1_at   | Ethylene receptor homolog                   | 3.32 |
| Mtr.17704.1.S1_s_at | Hypothetical protein                        | 3.32 |
| Mtr.13913.1.S1_at   | Phytochelatin synthetase-like protein       | 3.32 |
| Mtr.19330.1.S1_at   | Peptidase A1                                | 3.32 |
| Mtr.7084.1.S1_at    | Asparagine synthase                         | 3.31 |
| Mtr.33541.1.S1_x_at | Asparagine synthase                         | 3.31 |
| Mtr.7575.1.S1_at    | Hypothetical protein                        | 3.31 |
| Mtr.12111.1.S1_s_at | Enhancer of split complex m3 protein        | 3.31 |
| Mtr.36964.1.S1_at   | Hypothetical protein                        | 3.31 |
| Mtr.47588.1.S1_x_at | Hypothetical protein                        | 3.31 |
| Mtr.5072.1.S1_s_at  | Hypothetical protein                        | 3.31 |
| Msa.2711.1.S1_at    | Hypothetical protein                        | 3.31 |
| Mtr.8944.1.S1_at    | Chorismate mutase                           | 3.31 |
| Mtr.16956.1.S1_at   | O-methyltransferase                         | 3.31 |
| Mtr.9744.1.S1_at    | Hypothetical protein                        | 3.31 |
| Mtr.38709.1.S1_at   | Hypothetical protein                        | 3.31 |
| Mtr.14280.1.S1_at   | Thioredoxin-related protein                 | 3.30 |
| Mtr.42544.1.S1_at   | Nodulin-like protein                        | 3.30 |
| Mtr.5760.1.S1_at    | Hypothetical protein                        | 3.30 |
| Mtr.40961.1.S1_at   | Hypothetical protein                        | 3.30 |
| Mtr.37730.1.S1_at   | Golgi SNARE 11 protein                      | 3.30 |
| Mtr.26632.1.S1_at   | Hypothetical protein                        | 3.30 |
| Mtr.17625.1.S1_at   | Zn-finger, RING                             | 3.30 |
| Mtr.35346.1.S1_at   | Hypothetical protein                        | 3.29 |
| Mtr.40110.1.S1_at   | Ribosomal protein S27                       | 3.29 |
| Mtr.13009.1.S1_s_at | Hypothetical protein                        | 3.29 |
| Mtr.39867.1.S1_at   | Hypothetical protein                        | 3.29 |
| Mtr.12817.1.S1_at   | Hypothetical protein                        | 3.29 |
| Mtr.41306.1.S1_s_at | Hypothetical protein                        | 3.29 |
| Mtr.33563.1.S1_at   | Hypothetical protein                        | 3.28 |
| Mtr.43198.1.S1_at   | RNA helicase                                | 3.28 |
| Mtr.9362.1.S1_at    | Hypothetical protein                        | 3.28 |
| Mtr.15849.1.S1_at   | Glycine-rich RNA binding protein            | 3.28 |
| Mtr.43483.1.S1_at   | Hypothetical protein                        | 3.28 |
| Mtr.28563.1.S1_at   | Hypothetical protein                        | 3.28 |
| Mtr.15535.1.S1_at   | Serine/threonine protein kinase             | 3.28 |
| Mtr.16912.1.S1_at   | WD-40 repeat protein                        | 3.28 |
| Mtr.50185.1.S1_at   | Hypothetical protein                        | 3.28 |

|                     |                                                       |      |
|---------------------|-------------------------------------------------------|------|
| Mtr.43667.1.S1_at   | GAST1 protein homolog                                 | 3.28 |
| Mtr.39750.1.S1_at   | Hypothetical protein                                  | 3.28 |
| Mtr.5980.1.S1_at    | Hypothetical protein                                  | 3.28 |
| Mtr.12771.1.S1_at   | Pti 1 kinase-like protein                             | 3.28 |
| Mtr.10027.1.S1_at   | Hypothetical protein                                  | 3.27 |
| Mtr.11991.1.S1_at   | Strubbelig receptor family                            | 3.27 |
| Mtr.39440.1.S1_at   | Serine/threonine kinase                               | 3.27 |
| Mtr.40050.1.S1_at   | Rab escort protein                                    | 3.27 |
| Mtr.8259.1.S1_at    | Hypothetical protein                                  | 3.27 |
| Mtr.18898.1.S1_at   | WD-40 repeat                                          | 3.27 |
| Mtr.32032.1.S1_at   | Extensin-like protein                                 | 3.27 |
| Mtr.51599.1.S1_s_at | Serine/threonine protein kinase                       | 3.27 |
| Mtr.51695.1.S1_at   | Hypothetical protein                                  | 3.27 |
| Mtr.39020.1.S1_at   | Ethylene receptor homolog                             | 3.27 |
| Mtr.2685.1.S1_at    | Hypothetical protein                                  | 3.27 |
| Mtr.21241.1.S1_at   | Ribosomal protein L15e                                | 3.27 |
| Mtr.32820.1.S1_s_at | Glucan 1,3-beta-glucosidase                           | 3.27 |
| Mtr.19752.1.S1_at   | Hypothetical protein                                  | 3.26 |
| Mtr.34834.1.S1_at   | Serine/threonine protein kinase                       | 3.26 |
| Mtr.38725.1.S1_s_at | CDPK adapter protein                                  | 3.26 |
| Mtr.11064.1.S1_at   | DNA-directed RNA polymerase                           | 3.26 |
| Mtr.1174.1.S1_at    | Hypothetical protein                                  | 3.26 |
| Mtr.43436.1.S1_at   | Pantothenate kinase 1                                 | 3.26 |
| Mtr.44964.1.S1_at   | Hypothetical protein                                  | 3.26 |
| Msa.591.1.S1_at     | Hypothetical protein                                  | 3.26 |
| Mtr.40320.1.S1_at   | Hypothetical protein                                  | 3.26 |
| Mtr.15443.1.S1_at   | Hypothetical protein                                  | 3.26 |
| Mtr.41656.1.S1_at   | Hypothetical protein                                  | 3.26 |
| Mtr.49556.1.S1_s_at | RNA polymerase Rpb1                                   | 3.26 |
| Mtr.16204.1.S1_at   | Hypothetical protein                                  | 3.26 |
| Mtr.43171.1.S1_at   | Transcription factor WRKY4                            | 3.25 |
| Mtr.42452.1.S1_at   | Hypothetical protein                                  | 3.25 |
| Mtr.42375.1.S1_at   | Hypothetical protein                                  | 3.25 |
| Mtr.13714.1.S1_at   | Auxin-induced protein                                 | 3.25 |
| Mtr.12959.1.S1_s_at | Auxin response factor                                 | 3.25 |
| Mtr.34929.1.S1_at   | Zinc finger protein CONSTANS-LIKE                     | 3.25 |
| Mtr.25598.1.S1_at   | Delta24-sterol-C-methyltransferase                    | 3.25 |
| Mtr.7519.1.S1_at    | IFA-binding protein-like                              | 3.25 |
| Mtr.5080.1.S1_s_at  | Extensin (Class I)                                    | 3.25 |
| Mtr.377.1.S1_s_at   | Hypothetical protein                                  | 3.25 |
| Mtr.36790.1.S1_at   | Aconitate hydratase                                   | 3.25 |
| Mtr.41977.1.S1_at   | Hypothetical protein                                  | 3.25 |
| Mtr.44989.1.S1_at   | Nucleosome assembly protein                           | 3.25 |
| Mtr.39546.1.S1_at   | Hypothetical protein                                  | 3.25 |
| Mtr.41497.1.S1_at   | ARIADNE-like protein                                  | 3.24 |
| Mtr.20117.1.S1_at   | Peptidyl-prolyl cis-trans isomerase, cyclophilin type | 3.24 |
| Mtr.38368.1.S1_at   | Hypothetical protein                                  | 3.24 |
| Mtr.1871.1.S1_at    | Maturase K                                            | 3.24 |
| Mtr.50044.1.S1_at   | Thioredoxin-related protein                           | 3.23 |
| Mtr.9994.1.S1_at    | Hypothetical protein                                  | 3.23 |
| Mtr.24721.1.S1_at   | Heat shock transcription factor                       | 3.23 |
| Mtr.40786.1.S1_at   | 40S ribosomal protein S25-1                           | 3.23 |
| Msa.690.1.S1_at     | Hypothetical protein                                  | 3.23 |
| Mtr.10478.1.S1_at   | Cytoplasmic ribosomal protein S15a                    | 3.23 |

|                     |                                             |      |
|---------------------|---------------------------------------------|------|
| Mtr.43020.1.S1_at   | Fructokinase                                | 3.23 |
| Mtr.10164.1.S1_at   | Adenylate kinase                            | 3.23 |
| Mtr.51785.1.S1_at   | Hypothetical protein                        | 3.23 |
| Mtr.9221.1.S1_at    | Salicylic acid glucosyltransferase          | 3.23 |
| Mtr.37244.1.S1_at   | Hypothetical protein                        | 3.22 |
| Mtr.22264.1.S1_at   | Phosphoenolpyruvate/phosphate translocator  | 3.22 |
| Mtr.5578.1.S1_at    | Receptor protein kinase                     | 3.22 |
| Mtr.28125.1.S1_s_at | Early nodulin GRP3                          | 3.22 |
| Mtr.11333.1.S1_at   | Oxidase-like protein                        | 3.22 |
| Mtr.17858.1.S1_at   | Hypothetical protein                        | 3.22 |
| Mtr.24441.1.S1_s_at | Hypothetical protein                        | 3.22 |
| Mtr.13621.1.S1_s_at | Multidrug-resistance related protein        | 3.21 |
| Mtr.12656.1.S1_at   | NADPH:quinone oxidoreductase                | 3.21 |
| Mtr.9098.1.S1_at    | CREG2-protein-like                          | 3.21 |
| Mtr.691.1.S1_at     | Hypothetical protein                        | 3.21 |
| Mtr.14439.1.S1_at   | Hypothetical protein                        | 3.21 |
| Mtr.8914.1.S1_s_at  | SER/THR PROTEIN PHOSPHATASE PP2C HOMOLOG    | 3.21 |
| Mtr.50247.1.S1_at   | Sugar transporter                           | 3.21 |
| Mtr.14934.1.S1_s_at | Gly rich structural protein                 | 3.21 |
| Mtr.46455.1.S1_at   | Hypothetical protein                        | 3.21 |
| Mtr.40773.1.S1_at   | Hypothetical protein                        | 3.21 |
| Mtr.12514.1.S1_at   | NAM-like protein                            | 3.21 |
| Mtr.2071.1.S1_at    | Hypothetical protein                        | 3.21 |
| Mtr.39950.1.S1_at   | Hypothetical protein                        | 3.20 |
| Mtr.37584.1.S1_at   | Hypothetical protein                        | 3.20 |
| Mtr.15716.1.S1_at   | WD40                                        | 3.20 |
| Mtr.9984.1.S1_at    | Acyl-activating enzyme                      | 3.20 |
| Mtr.174.1.S1_at     | Response regulator protein                  | 3.20 |
| Mtr.41281.1.S1_s_at | Hypothetical protein                        | 3.20 |
| Mtr.42058.1.S1_s_at | Hypothetical protein                        | 3.20 |
| Mtr.45221.1.S1_at   | Hypothetical protein                        | 3.20 |
| Mtr.5567.1.S1_at    | Hypothetical protein                        | 3.20 |
| Mtr.41934.1.S1_at   | Pupal cuticle protein                       | 3.19 |
| Mtr.4597.1.S1_at    | Hypothetical protein                        | 3.19 |
| Mtr.8783.1.S1_at    | RNA helicase                                | 3.19 |
| Mtr.44464.1.S1_at   | Elongation factor G                         | 3.19 |
| Msa.1311.1.S1_at    | Hypothetical protein                        | 3.19 |
| Mtr.42889.1.S1_s_at | Elongation factor EF-2                      | 3.18 |
| Mtr.50746.1.S1_at   | Staphylococcus nuclease                     | 3.18 |
| Mtr.19050.1.S1_at   | Mitochondrial and plastid RNA polymerase    | 3.18 |
| Mtr.33699.1.S1_at   | Trehalose-6-phosphate synthase like protein | 3.18 |
| Mtr.12426.1.S1_at   | Dynamamin-like protein                      | 3.18 |
| Mtr.44597.1.S1_at   | Female-specific transformer protein         | 3.18 |
| Mtr.35761.1.S1_at   | Hypothetical protein                        | 3.18 |
| Mtr.13525.1.S1_at   | Hypothetical protein                        | 3.18 |
| Mtr.23686.1.S1_s_at | DNA-directed RNA polymerase subunit         | 3.17 |
| Mtr.42739.1.S1_at   | Protein kinase                              | 3.17 |
| Mtr.17255.1.S1_at   | Formyl transferase                          | 3.17 |
| Mtr.44281.1.S1_at   | Purple acid phosphatase                     | 3.17 |
| Mtr.32287.1.S1_at   | Hypothetical protein                        | 3.17 |
| Mtr.38541.1.S1_at   | Receptor-like protein kinase                | 3.17 |
| Mtr.40416.1.S1_at   | Hypothetical protein                        | 3.17 |
| Mtr.42380.1.S1_at   | Hypothetical protein                        | 3.17 |
| Mtr.32884.1.S1_s_at | Jasmonic acid 2                             | 3.17 |

|                     |                                                           |      |
|---------------------|-----------------------------------------------------------|------|
| Msa.1342.1.S1_at    | Hypothetical protein                                      | 3.16 |
| Mtr.12750.1.S1_at   | Hypothetical protein                                      | 3.16 |
| Mtr.47814.1.S1_at   | Hypothetical protein                                      | 3.16 |
| Mtr.20243.1.S1_s_at | Hypothetical protein                                      | 3.16 |
| Mtr.21478.1.S1_s_at | Hypothetical protein                                      | 3.16 |
| Mtr.10714.1.S1_at   | Receptor protein kinase                                   | 3.16 |
| Mtr.14517.1.S1_at   | RNA-binding protein                                       | 3.16 |
| Mtr.41454.1.S1_at   | Farnesylated protein                                      | 3.16 |
| Mtr.33283.1.S1_at   | Chitinase                                                 | 3.16 |
| Mtr.32363.1.S1_at   | Phosphatidylinositol/phosphatidylcholine transfer protein | 3.16 |
| Mtr.11679.1.S1_at   | Hypothetical protein                                      | 3.16 |
| Mtr.12784.1.S1_at   | Wound-induced GSK-3-like protein                          | 3.15 |
| Mtr.205.1.S1_at     | 40S ribosomal protein S12                                 | 3.15 |
| Mtr.10443.1.S1_at   | Glyceraldehyde-3-phosphate dehydrogenase                  | 3.15 |
| Mtr.39338.1.S1_at   | DNA-directed RNA polymerase I                             | 3.15 |
| Mtr.9647.1.S1_at    | Hypothetical protein                                      | 3.15 |
| Mtr.16955.1.S1_at   | Ribosomal protein S9                                      | 3.15 |
| Msa.1303.1.S1_at    | Hypothetical protein                                      | 3.15 |
| Mtr.44867.1.S1_at   | 1,3-fucosyltransferase                                    | 3.15 |
| Mtr.5213.1.S1_at    | TPR-repeat-containing proteins                            | 3.15 |
| Msa.1271.1.S1_at    | Hypothetical protein                                      | 3.15 |
| Mtr.45883.1.S1_at   | Hypothetical protein                                      | 3.15 |
| Mtr.11604.1.S1_s_at | Hypothetical protein                                      | 3.14 |
| Mtr.43074.1.S1_at   | RPM1-interacting protein                                  | 3.14 |
| Mtr.9510.1.S1_at    | Proliferating-cell nucleolar protein                      | 3.14 |
| Mtr.13558.1.S1_at   | Beta-galactosidase                                        | 3.14 |
| Mtr.50504.1.S1_at   | Protein kinase                                            | 3.14 |
| Mtr.6498.1.S1_at    | Hypothetical protein                                      | 3.14 |
| Mtr.20508.1.S1_s_at | Pyridine nucleotide-disulphide oxidoreductase, class-II   | 3.14 |
| Mtr.5392.1.S1_at    | Hypothetical protein                                      | 3.14 |
| Mtr.45171.1.S1_at   | Mitochondrial and chloroplast RNA polymerase              | 3.14 |
| Mtr.38928.1.S1_at   | Choline transporter-like protein                          | 3.14 |
| Mtr.31625.1.S1_at   | Receptor kinase                                           | 3.14 |
| Mtr.41177.1.S1_at   | Mitochondrial carrier protein                             | 3.14 |
| Mtr.38213.1.S1_at   | Hypothetical protein                                      | 3.14 |
| Mtr.51323.1.S1_s_at | Hypothetical protein                                      | 3.14 |
| Mtr.4347.1.S1_s_at  | Chalcone-flavonone isomerase                              | 3.13 |
| Mtr.8407.1.S1_at    | Hypothetical protein                                      | 3.13 |
| Msa.2750.1.S1_at    | Hypothetical protein                                      | 3.13 |
| Mtr.10349.1.S1_at   | Hypothetical protein                                      | 3.13 |
| Mtr.33159.1.S1_at   | Hypothetical protein                                      | 3.13 |
| Msa.1290.1.S1_at    | Hypothetical protein                                      | 3.13 |
| Mtr.22966.1.S1_s_at | Hypothetical protein                                      | 3.13 |
| Mtr.12961.1.S1_at   | Hypothetical protein                                      | 3.13 |
| Mtr.35231.1.S1_at   | Pathogenesis-related protein                              | 3.13 |
| Msa.1965.1.S1_at    | Hypothetical protein                                      | 3.13 |
| Mtr.6664.1.S1_at    | Hypothetical protein                                      | 3.13 |
| Mtr.10583.1.S1_at   | Root-specific metal transporter                           | 3.13 |
| Mtr.34637.1.S1_at   | Anthranilate N-benzoyltransferase-like protein            | 3.13 |
| Mtr.41732.1.S1_at   | Hypothetical protein                                      | 3.13 |
| Mtr.51829.1.S1_s_at | Response regulator receiver; CheY-like protein            | 3.13 |
| Msa.1218.1.S1_at    | Hypothetical protein                                      | 3.13 |
| Mtr.51636.1.S1_at   | Hypothetical protein                                      | 3.13 |
| Mtr.20237.1.S1_at   | Mitochondrial carrier protein                             | 3.13 |

|                     |                                                       |      |
|---------------------|-------------------------------------------------------|------|
| Mtr.5863.1.S1_at    | Isoflavonoid glucosyltransferase                      | 3.13 |
| Mtr.41634.1.S1_at   | Receptor kinase                                       | 3.12 |
| Mtr.35571.1.S1_at   | Hypothetical protein                                  | 3.12 |
| Mtr.41848.1.S1_at   | Acyl-CoA oxidase                                      | 3.12 |
| Mtr.44471.1.S1_at   | NADH dehydrogenase                                    | 3.12 |
| Mtr.12154.1.S1_at   | Hypothetical protein                                  | 3.12 |
| Mtr.4816.1.S1_at    | CDPK-like protein                                     | 3.12 |
| Mtr.19348.1.S1_x_at | Hypothetical protein                                  | 3.12 |
| Mtr.15650.1.S1_at   | Adenylate kinase                                      | 3.12 |
| Mtr.16016.1.S1_at   | Hypothetical protein                                  | 3.12 |
| Mtr.14274.1.S1_at   | RNA-binding protein                                   | 3.12 |
| Mtr.13716.1.S1_at   | Hypothetical protein                                  | 3.11 |
| Mtr.29305.1.S1_at   | Hypothetical protein                                  | 3.11 |
| Mtr.40007.1.S1_at   | Hypothetical protein                                  | 3.11 |
| Mtr.50358.1.S1_at   | Hypothetical protein                                  | 3.11 |
| Mtr.22834.1.S1_at   | Symbiotic ammonium transporter                        | 3.11 |
| Mtr.29620.1.S1_at   | Hypothetical protein                                  | 3.11 |
| Mtr.39981.1.S1_at   | CTR1-like protein kinase                              | 3.11 |
| Mtr.41029.1.S1_at   | Ankyrin repeat-containing protein                     | 3.11 |
| Mtr.12917.1.S1_at   | Jasmonic acid 2                                       | 3.11 |
| Mtr.37122.1.S1_at   | Hypothetical protein                                  | 3.11 |
| Mtr.3288.1.S1_at    | Hypothetical protein                                  | 3.11 |
| Mtr.29969.1.S1_at   | Hypothetical protein                                  | 3.11 |
| Mtr.9032.1.S1_at    | Aspartyl protease                                     | 3.11 |
| Mtr.39985.1.S1_at   | Hypothetical protein                                  | 3.11 |
| Mtr.2503.1.S1_s_at  | NEP1-interacting protein                              | 3.11 |
| Mtr.13113.1.S1_at   | Hypothetical protein                                  | 3.11 |
| Mtr.1887.1.S1_at    | Gibberellin oxidase-like protein                      | 3.10 |
| Mtr.39710.1.S1_at   | Hypothetical protein                                  | 3.10 |
| Mtr.43389.1.S1_at   | Fiber protein Fb2                                     | 3.10 |
| Mtr.5582.1.S1_s_at  | DNA-directed RNA polymerase I                         | 3.10 |
| Mtr.5620.1.S1_at    | Membrane cofactor protein                             | 3.10 |
| Mtr.37421.1.S1_at   | Somatic embryogenesis receptor-like kinase            | 3.10 |
| Mtr.12392.1.S1_at   | Phaseolin G-box binding protein                       | 3.10 |
| Mtr.8594.1.S1_at    | Soluble inorganic pyrophosphatase                     | 3.10 |
| Mtr.46085.1.S1_at   | Homeodomain-like protein                              | 3.10 |
| Mtr.8716.1.S1_at    | Ras-related protein                                   | 3.10 |
| Mtr.21025.1.S1_at   | Alpha/beta hydrolase                                  | 3.09 |
| Mtr.43511.1.S1_at   | Nucleic acid binding protein                          | 3.09 |
| Mtr.36679.1.S1_s_at | Hypothetical protein                                  | 3.09 |
| Mtr.49129.1.S1_s_at | Puf RNA-binding protein                               | 3.09 |
| Mtr.1692.1.S1_at    | Hypothetical protein                                  | 3.09 |
| Mtr.41430.1.S1_at   | Hypothetical protein                                  | 3.09 |
| Mtr.41930.1.S1_at   | Hypothetical protein                                  | 3.09 |
| Mtr.37423.1.S1_at   | Chaperonin CPN60-2, mitochondrial precursor (HSP60-2) | 3.09 |
| Mtr.16619.1.S1_at   | Ribosomal protein L24E                                | 3.09 |
| Mtr.35606.1.S1_at   | Hypothetical protein                                  | 3.09 |
| Mtr.6798.1.S1_at    | NADH dehydrogenase subunit 5                          | 3.09 |
| Mtr.24341.1.S1_at   | Hypothetical protein                                  | 3.09 |
| Mtr.5840.1.S1_at    | Hypothetical protein                                  | 3.09 |
| Mtr.50730.1.S1_at   | bZIP transcription factor                             | 3.09 |
| Mtr.48949.1.S1_at   | Biopterin transport-related protein                   | 3.09 |
| Mtr.40474.1.S1_at   | Ribosomal protein 30S                                 | 3.09 |
| Mtr.43306.1.S1_at   | Nucleic acid binding protein                          | 3.09 |

|                     |                                                     |      |
|---------------------|-----------------------------------------------------|------|
| Mtr.31452.1.S1_at   | Hypothetical protein                                | 3.08 |
| Msa.1102.1.S1_at    | Hypothetical protein                                | 3.08 |
| Mtr.41303.1.S1_at   | Hypothetical protein                                | 3.08 |
| Mtr.40130.1.S1_at   | Peroxidase                                          | 3.08 |
| Mtr.28321.1.S1_s_at | Phloem-specific lectin PP2-like protein             | 3.08 |
| Mtr.20487.1.S1_at   | Hypothetical protein                                | 3.08 |
| Mtr.8495.1.S1_at    | Endoplasmic reticulum HSC70-cognate binding protein | 3.08 |
| Mtr.42021.1.S1_at   | 1-aminocyclopropane-1-carboxylate oxidase           | 3.08 |
| Mtr.37956.1.S1_at   | Hypothetical protein                                | 3.08 |
| Mtr.33608.1.S1_at   | Hypothetical protein                                | 3.08 |
| Mtr.11602.1.S1_at   | Hypothetical protein                                | 3.08 |
| Mtr.28049.1.S1_at   | Hypothetical protein                                | 3.08 |
| Mtr.9213.1.S1_at    | NIMA-related protein kinase                         | 3.07 |
| Mtr.33201.1.S1_at   | Hypothetical protein                                | 3.07 |
| Mtr.34946.1.S1_at   | Hypothetical protein                                | 3.07 |
| Mtr.13773.1.S1_at   | NADH dehydrogenase subunit 4                        | 3.07 |
| Mtr.44333.1.S1_s_at | Hypothetical protein                                | 3.07 |
| Mtr.41152.1.S1_at   | Hypothetical protein                                | 3.07 |
| Mtr.43544.1.S1_at   | Covalently-linked cell wall protein 7               | 3.07 |
| Mtr.8462.1.S1_at    | Lipoxygenase                                        | 3.07 |
| Mtr.1767.1.S1_at    | Hypothetical protein                                | 3.07 |
| Mtr.41578.1.S1_at   | Hypothetical protein                                | 3.07 |
| Mtr.12053.1.S1_at   | Serine acetyltransferase                            | 3.07 |
| Mtr.374.1.S1_at     | Hypothetical protein                                | 3.07 |
| Mtr.38304.1.S1_s_at | Hypothetical protein                                | 3.07 |
| Mtr.4344.1.S1_at    | Rapid alkalization factor 2                         | 3.07 |
| Mtr.44885.1.S1_at   | Hypothetical protein                                | 3.07 |
| Mtr.26965.1.S1_at   | Hypothetical protein                                | 3.07 |
| Mtr.43865.1.S1_at   | Heat shock protein 83                               | 3.07 |
| Mtr.50494.1.S1_s_at | Hypothetical protein                                | 3.07 |
| Msa.2793.1.S1_at    | Hypothetical protein                                | 3.07 |
| Mtr.23204.1.S1_x_at | Hypothetical protein                                | 3.06 |
| Msa.2808.1.S1_at    | Hypothetical protein                                | 3.06 |
| Mtr.10744.1.S1_at   | Hypothetical protein                                | 3.06 |
| Mtr.32827.1.S1_s_at | Hypothetical protein                                | 3.06 |
| Mtr.24032.1.S1_at   | Hypothetical protein                                | 3.06 |
| Mtr.13834.1.S1_at   | Hypothetical protein                                | 3.06 |
| Mtr.14845.1.S1_s_at | Hypothetical protein                                | 3.06 |
| Mtr.45351.1.S1_s_at | Hypothetical protein                                | 3.06 |
| Mtr.13646.1.S1_at   | Hypothetical protein                                | 3.06 |
| Mtr.43847.1.S1_at   | Mitochondrial carrier protein                       | 3.06 |
| Mtr.12230.1.S1_s_at | Elongation factor 2                                 | 3.06 |
| Mtr.21300.1.S1_at   | Small nuclear-like ribonucleoprotein                | 3.05 |
| Mtr.36034.1.S1_at   | Hypothetical protein                                | 3.05 |
| Mtr.50766.1.S1_at   | Hypothetical protein                                | 3.05 |
| Mtr.9417.1.S1_at    | Beta-galactosidase                                  | 3.05 |
| Mtr.6343.1.S1_at    | Hydroxyproline-rich glycoprotein                    | 3.05 |
| Mtr.28513.1.S1_at   | Phospholipase D                                     | 3.05 |
| Mtr.11078.1.S1_at   | Hypothetical protein                                | 3.05 |
| Mtr.6418.1.S1_s_at  | Hypothetical protein                                | 3.05 |
| Mtr.40782.1.S1_at   | Hypothetical protein                                | 3.05 |
| Mtr.43936.1.S1_at   | Ser/Thr protein kinase                              | 3.05 |
| Mtr.9031.1.S1_s_at  | Nucellin-like aspartic protease                     | 3.05 |
| Mtr.28286.1.S1_at   | Hypothetical protein                                | 3.05 |

|                     |                                             |      |
|---------------------|---------------------------------------------|------|
| Mtr.42839.1.S1_at   | Hypothetical protein                        | 3.05 |
| Mtr.50416.1.S1_at   | Phosphatidylinositol 3- and 4-kinase        | 3.05 |
| Mtr.27318.1.S1_at   | Fructose-bisphosphate aldolase              | 3.05 |
| Mtr.42528.1.S1_at   | Hypothetical protein                        | 3.04 |
| Mtr.2386.1.S1_at    | Hypothetical protein                        | 3.04 |
| Mtr.10736.1.S1_at   | Hypothetical protein                        | 3.04 |
| Mtr.28378.1.S1_at   | Hypothetical protein                        | 3.04 |
| Mtr.15376.1.S1_at   | Hypothetical protein                        | 3.04 |
| Mtr.19399.1.S1_at   | Glutathione S-transferase                   | 3.04 |
| Mtr.52344.1.S1_at   | Aminotransferase                            | 3.04 |
| Mtr.32578.1.S1_at   | Hypothetical protein                        | 3.04 |
| Mtr.38635.1.S1_at   | Peroxidase                                  | 3.04 |
| Mtr.43265.1.S1_at   | Hypothetical protein                        | 3.04 |
| Mtr.45123.1.S1_at   | Hypothetical protein                        | 3.04 |
| Mtr.41453.1.S1_at   | Hypothetical protein                        | 3.04 |
| Mtr.44587.1.S1_at   | Peroxisomal acetoacetyl-coenzyme A thiolase | 3.04 |
| Mtr.38970.1.S1_at   | Hypothetical protein                        | 3.04 |
| Mtr.51932.1.S1_at   | Quinonprotein alcohol dehydrogenase         | 3.04 |
| Mtr.30728.1.S1_at   | SAR DNA-binding protein                     | 3.04 |
| Mtr.5045.1.S1_at    | Hypothetical protein                        | 3.04 |
| Mtr.1893.1.S1_at    | Hypothetical protein                        | 3.03 |
| Mtr.46098.1.S1_s_at | Zn-finger, DHHC type                        | 3.03 |
| Mtr.23743.1.S1_at   | Hypothetical protein                        | 3.03 |
| Msa.1037.1.S1_at    | Hypothetical protein                        | 3.03 |
| Mtr.25749.1.S1_at   | Copper amine oxidase                        | 3.03 |
| Mtr.6671.1.S1_at    | Hypothetical protein                        | 3.03 |
| Mtr.43151.1.S1_at   | Beta-galactosidase                          | 3.03 |
| Mtr.43129.1.S1_at   | Arginine decarboxylase                      | 3.02 |
| Mtr.25309.1.S1_at   | Hypothetical protein                        | 3.02 |
| Mtr.33064.1.S1_at   | Calmodulin-binding protein                  | 3.02 |
| Mtr.31446.1.S1_at   | Hypothetical protein                        | 3.02 |
| Mtr.13453.1.S1_at   | Hypothetical protein                        | 3.02 |
| Mtr.38855.1.S1_at   | Hypothetical protein                        | 3.02 |
| Msa.1686.1.S1_s_at  | Hypothetical protein                        | 3.02 |
| Mtr.33034.1.S1_at   | Chromobox protein                           | 3.02 |
| Mtr.9077.1.S1_at    | Hypothetical protein                        | 3.02 |
| Msa.277.1.S1_at     | Hypothetical protein                        | 3.02 |
| Mtr.8479.1.S1_at    | Cytochrome P450                             | 3.02 |
| Mtr.19346.1.S1_s_at | Hypothetical protein                        | 3.02 |
| Mtr.4284.1.S1_at    | Hypothetical protein                        | 3.02 |
| Mtr.40928.1.S1_at   | PGPD14 protein                              | 3.02 |
| Mtr.51291.1.S1_at   | Pathogenesis-related transcriptional factor | 3.02 |
| Mtr.41492.1.S1_at   | Phytochrome-associated protein              | 3.01 |
| Mtr.42907.1.S1_at   | Hypothetical protein                        | 3.01 |
| Mtr.29453.1.S1_at   | Hypothetical protein                        | 3.01 |
| Mtr.27737.1.S1_at   | Hypothetical protein                        | 3.01 |
| Mtr.27653.1.S1_s_at | Hypothetical protein                        | 3.01 |
| Mtr.2692.1.S1_at    | Hypothetical protein                        | 3.01 |
| Mtr.11774.1.S1_at   | Hypothetical protein                        | 3.01 |
| Mtr.43348.1.S1_at   | Isoprenylated protein                       | 3.01 |
| Mtr.43493.1.S1_at   | Hypothetical protein                        | 3.01 |
| Mtr.27102.1.S1_at   | Hypothetical protein                        | 3.01 |
| Mtr.28295.1.S1_s_at | Female-specific transformer protein         | 3.01 |
| Mtr.12018.1.S1_at   | Hypothetical protein                        | 3.01 |



|                     |                             |      |
|---------------------|-----------------------------|------|
| Mtr.50704.1.S1_at   | Aldehyde dehydrogenase      | 3.01 |
| Mtr.23789.1.S1_s_at | Glutamate decarboxylase     | 3.01 |
| Mtr.32877.1.S1_at   | Hypothetical protein        | 3.01 |
| Msa.1002.1.S1_at    | Hypothetical protein        | 3.00 |
| Mtr.12120.1.S1_at   | Hypothetical protein        | 3.00 |
| Mtr.10838.1.S1_at   | Leucine-rich repeat protein | 3.00 |

**Supplementary Table S2. Downregulated genes at 12 hours after inoculation with soybean rust**

| <b>Probesets</b>    | <b>Target Description</b>                                         | <b>Fold reduction</b> |
|---------------------|-------------------------------------------------------------------|-----------------------|
| Mtr.26465.1.S1_s_at | Phosphoethanolamine N-methyltransferase                           | -886.26               |
| Mtr.13982.1.S1_at   | CDP-diacylglycerol-glycerol-3-phosphate 3-phosphatidyltransferase | -687.90               |
| Mtr.35794.1.S1_s_at | Myo-inositol 1-phosphate synthase                                 | -659.64               |
| Mtr.20438.1.S1_at   | O-methyltransferase                                               | -639.88               |
| Mtr.20321.1.S1_at   | Plant lipid transfer/seed storage/trypsin-alpha amylase inhibitor | -629.87               |
| Mtr.42849.1.S1_at   | Myo-inositol-1-phosphate synthase                                 | -520.47               |
| Mtr.8427.1.S1_at    | Lipoxygenase                                                      | -469.91               |
| Mtr.12069.1.S1_at   | Phosphoethanolamine N-methyltransferase                           | -363.98               |
| Msa.888.1.S1_at     | Hypothetical protein                                              | -339.34               |
| Mtr.11085.1.S1_at   | LHY protein                                                       | -329.74               |
| Mtr.8618.1.S1_at    | Cytochrome P450 monooxygenase CYP93D1                             | -328.21               |
| Mtr.43021.1.S1_at   | 1-deoxy-D-xylulose 5-phosphate reductoisomerase                   | -325.67               |
| Msa.2715.1.S1_at    | Hypothetical protein                                              | -268.19               |
| Mtr.44581.1.S1_at   | Hypothetical protein                                              | -244.04               |
| Mtr.10456.1.S1_at   | Early light inducible protein                                     | -213.77               |
| Mtr.12499.1.S1_s_at | Hypothetical protein                                              | -208.32               |
| Mtr.40245.1.S1_s_at | Early light inducible protein                                     | -206.93               |
| Mtr.12393.1.S1_at   | Cinnamoyl-CoA reductase                                           | -204.37               |
| Mtr.44731.1.S1_at   | Hypothetical protein                                              | -201.56               |
| Mtr.38552.1.S1_s_at | Hypothetical protein                                              | -199.56               |
| Mtr.10369.1.S1_at   | Chalcone synthase                                                 | -188.66               |
| Mtr.15442.1.S1_at   | Hypothetical protein                                              | -188.28               |
| Mtr.8651.1.S1_a_at  | Dehydrin-like protein                                             | -173.38               |
| Mtr.773.1.S1_s_at   | LHY protein                                                       | -169.80               |
| Msa.888.1.S1_s_at   | Hypothetical protein                                              | -167.82               |
| Mtr.16402.1.S1_at   | NADPH HC toxin reductase                                          | -167.17               |
| Mtr.12272.1.S1_at   | Granule-bound glycogen (Starch) synthase                          | -166.78               |
| Mtr.8651.1.S1_at    | Dehydrin-like protein                                             | -166.21               |
| Mtr.42858.1.S1_at   | Acid phosphatase                                                  | -163.28               |
| Mtr.9320.1.S1_at    | Hypothetical protein                                              | -162.56               |
| Mtr.42982.1.S1_s_at | Carbonic anhydrase                                                | -161.97               |
| Mtr.52215.1.S1_at   | Lipoxygenase                                                      | -159.17               |
| Mtr.10457.1.S1_at   | Early light inducible protein                                     | -155.94               |
| Mtr.10659.1.S1_s_at | Hypothetical protein                                              | -152.50               |
| Mtr.26601.1.S1_s_at | FRO1-like protein                                                 | -150.56               |
| Mtr.52315.1.S1_at   | Heat shock protein DnaJ                                           | -138.14               |
| Mtr.38073.1.S1_at   | Dihydroflavanol-4-reductase 1                                     | -134.50               |
| Mtr.44812.1.S1_s_at | Extracellular calcium sensing receptor                            | -131.73               |
| Msa.3134.1.S1_at    | Hypothetical protein                                              | -131.02               |
| Mtr.14290.1.S1_at   | Rhodanese-like protein                                            | -130.84               |
| Mtr.43089.1.S1_at   | Seed maturation protein LEA 4                                     | -130.56               |
| Mtr.10450.1.S1_at   | Hypothetical protein                                              | -130.13               |
| Mtr.46164.1.S1_s_at | Hypothetical protein                                              | -127.64               |
| Mtr.51205.1.S1_at   | Hypothetical protein                                              | -125.87               |
| Mtr.4439.1.S1_s_at  | Thioredoxin H2                                                    | -125.15               |
| Mtr.26602.1.S1_s_at | NADPH oxidase                                                     | -121.40               |
| Msa.3155.1.S1_at    | Hypothetical protein                                              | -120.72               |
| Mtr.43870.1.S1_at   | NADPH oxidase                                                     | -118.73               |
| Mtr.46609.1.S1_at   | UDP-glycosyltransferase                                           | -116.66               |
| Mtr.11110.1.S1_at   | GCN5-related N-acetyltransferase (GNAT) family                    | -116.56               |
| Mtr.768.1.S1_at     | Hypothetical protein                                              | -111.46               |
| Mtr.28774.1.S1_at   | Anthocyanidin synthase                                            | -111.08               |

|                     |                                                       |         |
|---------------------|-------------------------------------------------------|---------|
| Mtr.12687.1.S1_at   | Hypothetical protein                                  | -107.69 |
| Mtr.13564.1.S1_s_at | Extracellular calcium sensing receptor                | -106.98 |
| Mtr.45133.1.S1_at   | Amine oxidase                                         | -105.86 |
| Msa.1858.1.S1_at    | Hypothetical protein                                  | -105.24 |
| Mtr.35685.1.S1_at   | Heat shock protein                                    | -105.09 |
| Mtr.12942.1.S1_at   | Late embryogenesis abundant protein                   | -104.14 |
| Mtr.37221.1.S1_at   | Photosystem II type I chlorophyll a/b-binding protein | -103.58 |
| Mtr.13397.1.S1_at   | Regulator of chromosome condensation-like protein     | -103.53 |
| Mtr.50943.1.S1_at   | Peptidase                                             | -103.51 |
| Mtr.32878.1.S1_at   | Zeaxanthin epoxidase                                  | -103.43 |
| Msa.3125.1.S1_at    | Hypothetical protein                                  | -102.00 |
| Mtr.40719.1.S1_s_at | Tic62 protein                                         | -101.44 |
| Mtr.1186.1.S1_s_at  | Hypothetical protein                                  | -100.32 |
| Mtr.16410.1.S1_at   | Alpha/beta hydrolase                                  | -98.49  |
| Mtr.13375.1.S1_at   | Hypothetical protein                                  | -96.56  |
| Mtr.6142.1.S1_at    | Jasmonate O-methyltransferase                         | -95.18  |
| Mtr.32797.1.S1_s_at | Sphingolipid long chain base delta 8 desaturase       | -95.02  |
| Mtr.11284.1.S1_at   | Oxygen evolving complex protein                       | -94.72  |
| Mtr.27879.1.S1_at   | Hypothetical protein                                  | -93.52  |
| Mtr.31194.1.S1_at   | Cytochrome P450                                       | -92.98  |
| Mtr.26044.1.S1_s_at | Circadian clock associated1                           | -92.09  |
| Msa.1358.1.S1_at    | Hypothetical protein                                  | -90.45  |
| Mtr.26465.1.S1_at   | Phosphoethanolamine N-methyltransferase               | -89.27  |
| Mtr.13014.1.S1_at   | Amine oxidase                                         | -89.20  |
| Mtr.10693.1.S1_at   | Cytochrome P450                                       | -87.45  |
| Mtr.35696.1.S1_s_at | Hypothetical protein                                  | -87.40  |
| Mtr.19759.1.S1_at   | Zinc-containing alcohol dehydrogenase                 | -87.05  |
| Mtr.48649.1.S1_at   | Cellulose synthase                                    | -86.86  |
| Mtr.32302.1.S1_at   | Hypothetical protein                                  | -86.68  |
| Msa.3055.1.S1_at    | Hypothetical protein                                  | -85.57  |
| Mtr.37252.1.S1_at   | Salt-tolerance protein                                | -85.29  |
| Mtr.44844.1.S1_at   | Chalcone reductase                                    | -84.93  |
| Msa.2980.1.S1_at    | Hypothetical protein                                  | -84.83  |
| Mtr.9873.1.S1_at    | Thioredoxin H2                                        | -84.73  |
| Mtr.41960.1.S1_at   | Hypothetical protein                                  | -83.91  |
| Mtr.39986.1.S1_at   | Hypothetical protein                                  | -83.69  |
| Mtr.43296.1.S1_at   | Hypothetical protein                                  | -83.56  |
| Mtr.41063.1.S1_at   | Nine-cis-epoxycarotenoid dioxygenase4                 | -83.49  |
| Mtr.38344.1.S1_at   | Limonoid UDP-glucosyltransferase                      | -83.28  |
| Mtr.38769.1.S1_at   | Steroid 5alpha-reductase-like protein                 | -82.98  |
| Mtr.47151.1.S1_at   | Glutathione S-transferase                             | -82.72  |
| Mtr.26597.1.S1_at   | Hypothetical protein                                  | -82.01  |
| Mtr.41445.1.S1_at   | Hypothetical protein                                  | -81.97  |
| Mtr.8771.1.S1_at    | Hypothetical protein                                  | -80.53  |
| Mtr.50035.1.S1_at   | Hypothetical protein                                  | -80.37  |
| Mtr.35647.1.S1_at   | Hypothetical protein                                  | -80.25  |
| Mtr.9796.1.S1_at    | Hypothetical protein                                  | -79.62  |
| Mtr.49244.1.S1_at   | NADPH HC toxin reductase                              | -79.35  |
| Mtr.33852.1.S1_at   | CpABA1 protein                                        | -79.16  |
| Mtr.9735.1.S1_a_at  | Tic62 protein                                         | -78.96  |
| Mtr.40546.1.S1_at   | Hypothetical protein                                  | -78.79  |
| Mtr.7343.1.S1_at    | ADP-glucose pyrophosphorylase                         | -78.45  |
| Mtr.16941.1.S1_at   | UDP-glucuronosyl/UDP-glucosyltransferase              | -78.26  |
| Mtr.41463.1.S1_at   | ADP-glucose pyrophosphorylase                         | -76.89  |

|                     |                                                       |        |
|---------------------|-------------------------------------------------------|--------|
| Mtr.6707.1.S1_s_at  | Hypothetical protein                                  | -76.71 |
| Mtr.40861.1.S1_at   | Cytochrome P450                                       | -75.25 |
| Mtr.6048.1.S1_s_at  | Hypothetical protein                                  | -74.78 |
| Mtr.12806.1.S1_at   | Ascorbate oxidase promoter-binding protein            | -74.29 |
| Mtr.8438.1.S1_at    | LHCII type I chlorophyll a/b-binding protein          | -73.81 |
| Mtr.42981.1.S1_s_at | Hypothetical protein                                  | -73.75 |
| Mtr.12797.1.S1_at   | Family II lipase EXL3                                 | -72.40 |
| Mtr.37367.1.S1_at   | UDP-glucosyltransferase                               | -72.23 |
| Mtr.1857.1.S1_at    | CpABA1 protein                                        | -72.08 |
| Mtr.37215.1.S1_at   | Photosystem II type I chlorophyll a/b-binding protein | -71.98 |
| Mtr.41828.1.S1_at   | Thylakoid soluble phosphoprotein                      | -71.72 |
| Mtr.41387.1.S1_at   | Hypothetical protein                                  | -71.63 |
| Mtr.42902.1.S1_s_at | Hypothetical protein                                  | -71.55 |
| Mtr.2065.1.S1_at    | Hypothetical protein                                  | -70.87 |
| Mtr.5956.1.S1_s_at  | Late embryogenesis abundant protein                   | -70.49 |
| Mtr.37363.1.S1_at   | CPRD46 protein                                        | -69.95 |
| Mtr.37384.1.S1_at   | Granule-bound starch synthase                         | -69.94 |
| Mtr.12682.1.S1_at   | Light-harvesting complex protein                      | -69.88 |
| Mtr.41416.1.S1_at   | Drought-induced protein RDI                           | -69.78 |
| Mtr.34140.1.S1_at   | CpABA1 protein                                        | -69.30 |
| Mtr.1274.1.S1_at    | Proline-rich protein                                  | -69.27 |
| Mtr.11048.1.S1_at   | Hypothetical protein                                  | -68.83 |
| Mtr.40306.1.S1_at   | Hypothetical protein                                  | -68.75 |
| Mtr.35240.1.S1_s_at | Xyloglucan endotransglycosylase hydrolase 1           | -68.73 |
| Mtr.50430.1.S1_at   | Lipoxygenase                                          | -68.30 |
| Msa.927.1.S1_at     | Hypothetical protein                                  | -68.24 |
| Mtr.14755.1.S1_at   | Hypothetical protein                                  | -67.88 |
| Mtr.26036.1.S1_s_at | Fatty acid elongase 3-ketoacyl-CoA synthase 1 (KCS1)  | -67.54 |
| Mtr.11088.1.S1_at   | 37kDa chloroplast inner envelope membrane polypeptide | -67.08 |
| Mtr.13758.1.S1_at   | Hypothetical protein                                  | -65.84 |
| Mtr.12327.1.S1_s_at | Late embryogenesis abundant protein                   | -65.60 |
| Mtr.241.1.S1_at     | Delta-6-desaturase                                    | -65.58 |
| Mtr.43118.1.S1_s_at | Cytochrome P450 72A1                                  | -65.51 |
| Mtr.39290.1.S1_at   | Hypothetical protein                                  | -65.50 |
| Mtr.38596.1.S1_at   | Amine oxidase                                         | -65.39 |
| Mtr.44988.1.S1_at   | Zeaxanthin epoxidase                                  | -64.58 |
| Msa.1690.1.S1_at    | Hypothetical protein                                  | -63.94 |
| Mtr.38772.1.S1_at   | In2-1 protein                                         | -63.80 |
| Msa.1752.1.S1_s_at  | Hypothetical protein                                  | -63.58 |
| Msa.2589.1.S1_at    | Hypothetical protein                                  | -62.53 |
| Mtr.8650.1.S1_at    | Xyloglucan endotransglycosylase hydrolase 1           | -62.46 |
| Mtr.44505.1.S1_at   | Glucosyltransferase-9                                 | -61.62 |
| Mtr.8475.1.S1_s_at  | Plastidic aldolase                                    | -61.60 |
| Msa.2924.1.S1_at    | Hypothetical protein                                  | -61.13 |
| Msa.1578.1.S1_at    | Hypothetical protein                                  | -61.10 |
| Mtr.42335.1.S1_at   | Hypothetical protein                                  | -61.05 |
| Mtr.13564.1.S1_at   | Extracellular calcium sensing receptor                | -61.03 |
| Mtr.2129.1.S1_at    | Hypothetical protein                                  | -61.01 |
| Mtr.37362.1.S1_at   | CPRD46 protein                                        | -60.30 |
| Mtr.253.1.S1_at     | Symbiotic ammonium transporter                        | -59.84 |
| Mtr.13261.1.S1_s_at | Hypothetical protein                                  | -59.78 |
| Mtr.33745.1.S1_s_at | Hypothetical protein                                  | -59.78 |
| Mtr.43886.1.S1_at   | RNA polymerase sigma subunit SigE                     | -59.43 |
| Mtr.43117.1.S1_at   | Cytochrome P450                                       | -59.39 |

|                     |                                                    |        |
|---------------------|----------------------------------------------------|--------|
| Mtr.36069.1.S1_s_at | Hypothetical protein                               | -58.96 |
| Mtr.18535.1.S1_at   | Hypothetical protein                               | -57.76 |
| Mtr.10604.1.S1_at   | Nitrate reductase                                  | -57.21 |
| Mtr.19547.1.S1_s_at | Nucleoside phosphatase                             | -57.21 |
| Mtr.13242.1.S1_at   | Magnesium chelatase                                | -57.06 |
| Mtr.51618.1.S1_at   | Hypothetical protein                               | -56.50 |
| Mtr.6031.1.S1_at    | Lipid transfer protein                             | -56.38 |
| Mtr.37368.1.S1_at   | Hypothetical protein                               | -56.35 |
| Mtr.12199.1.S1_at   | Ascorbate oxidase promoter-binding protein         | -55.61 |
| Mtr.50943.1.S1_s_at | Peptidase                                          | -55.20 |
| Msa.2805.1.S1_at    | Hypothetical protein                               | -55.16 |
| Mtr.9236.1.S1_at    | ADP-glucose pyrophosphorylase                      | -55.06 |
| Mtr.41942.1.S1_at   | Hypothetical protein                               | -54.70 |
| Mtr.13484.1.S1_s_at | Golden2-like protein 2                             | -54.65 |
| Mtr.23405.1.S1_at   | Hypothetical protein                               | -54.52 |
| Mtr.32384.1.S1_s_at | Beta-amyrin synthase                               | -54.50 |
| Mtr.41393.1.S1_at   | Hypothetical protein                               | -54.42 |
| Mtr.43208.1.S1_at   | Thioredoxin F-type                                 | -53.95 |
| Mtr.18630.1.S1_at   | Prenyltransferase/squalene oxidase                 | -53.65 |
| Mtr.10948.1.S1_at   | Hypothetical protein                               | -53.36 |
| Msa.1858.1.S1_x_at  | Hypothetical protein                               | -53.35 |
| Mtr.4951.1.S1_at    | Hypothetical protein                               | -53.00 |
| Mtr.34690.1.S1_at   | Lactoylglutathione lyase                           | -52.99 |
| Mtr.21070.1.S1_at   | Hypothetical protein                               | -52.76 |
| Mtr.2064.1.S1_at    | Hypothetical protein                               | -52.53 |
| Mtr.8554.1.S1_at    | Fructose-bisphosphate aldolase                     | -51.97 |
| Mtr.32679.1.S1_at   | Hypothetical protein                               | -51.87 |
| Msa.1381.1.S1_at    | Hypothetical protein                               | -51.81 |
| Msa.3003.1.S1_at    | Hypothetical protein                               | -51.75 |
| Mtr.14426.1.S1_at   | Aldo/keto reductase                                | -51.48 |
| Msa.1593.1.S1_at    | Hypothetical protein                               | -51.17 |
| Mtr.27305.1.S1_at   | S-receptor kinase-like protein 2                   | -50.98 |
| Msa.1451.1.S1_at    | Hypothetical protein                               | -50.88 |
| Mtr.36333.1.S1_at   | Flavonoid 3'-hydroxylase                           | -50.72 |
| Mtr.40497.1.S1_at   | Glucose acyltransferase                            | -50.71 |
| Mtr.8530.1.S1_s_at  | Hypothetical protein                               | -50.61 |
| Mtr.40432.1.S1_at   | Sedoheptulose-1,7-bisphosphatase                   | -50.45 |
| Mtr.48573.1.S1_at   | Haloacid dehalogenase-like hydrolase               | -50.26 |
| Mtr.14608.1.S1_at   | Heat shock protein Hsp20                           | -49.87 |
| Mtr.31744.1.S1_at   | Anthranilate N-hydroxycinnamoyl/benzoyltransferase | -49.61 |
| Msa.1609.1.S1_at    | Hypothetical protein                               | -49.37 |
| Mtr.40669.1.S1_at   | FK506 binding protein 1                            | -49.31 |
| Mtr.34723.1.S1_at   | 37 kDa inner envelope membrane protein             | -48.76 |
| Mtr.34955.1.S1_at   | Hypothetical protein                               | -48.59 |
| Mtr.44591.1.S1_at   | Quinone oxidoreductase                             | -48.58 |
| Mtr.44991.1.S1_at   | Cucumisin-like serine protease                     | -48.53 |
| Mtr.15717.1.S1_at   | Chlorophyll A-B binding protein                    | -48.26 |
| Mtr.39190.1.S1_at   | Cytochrome p450                                    | -48.24 |
| Mtr.43589.1.S1_at   | Protease Do-like 1                                 | -48.11 |
| Mtr.5358.1.S1_at    | Cellulose synthase                                 | -47.87 |
| Mtr.43911.1.S1_at   | Hypothetical protein                               | -47.70 |
| Mtr.22141.1.S1_at   | Glycosyltransferase                                | -47.63 |
| Mtr.9748.1.S1_at    | Peptidyl-prolyl cis-trans isomerase TLP38          | -47.62 |
| Mtr.41042.1.S1_s_at | Phosphoethanolamine N-methyltransferase            | -47.47 |

|                     |                                                             |        |
|---------------------|-------------------------------------------------------------|--------|
| Mtr.49177.1.S1_at   | Dienelactone hydrolase                                      | -47.42 |
| Mtr.36457.1.S1_at   | RNA polymerase sigma subunit SigE                           | -47.40 |
| Msa.3075.1.S1_at    | Hypothetical protein                                        | -47.28 |
| Msa.1004.1.S1_at    | Hypothetical protein                                        | -46.87 |
| Mtr.17090.1.S1_at   | Myb, DNA-binding                                            | -46.40 |
| Mtr.3423.1.S1_at    | Vesicular glutamate transporter-3                           | -46.36 |
| Mtr.39853.1.S1_at   | Basic PR-1 protein                                          | -46.12 |
| Mtr.5628.1.S1_s_at  | Lipoxygenase                                                | -45.95 |
| Mtr.33633.1.S1_at   | Subtilisin-like serine protease                             | -45.75 |
| Mtr.18035.1.S1_at   | Protein phosphatase 2C                                      | -45.31 |
| Mtr.8552.1.S1_at    | Hypothetical protein                                        | -44.99 |
| Mtr.42226.1.S1_at   | Ent-kaurenoic acid oxidase                                  | -44.83 |
| Mtr.9328.1.S1_at    | Carboxyl terminal protease                                  | -44.67 |
| Mtr.6748.1.S1_at    | Hypothetical protein                                        | -44.34 |
| Mtr.33820.1.S1_at   | Beta-galactosidase                                          | -44.13 |
| Mtr.8476.1.S1_at    | Plastidic aldolase                                          | -44.10 |
| Mtr.37557.1.S1_at   | Nine-cis-epoxycarotenoid dioxygenase1                       | -43.93 |
| Mtr.17317.1.S1_at   | S-adenosyl-methionine-sterol-C-methyltransferase            | -43.67 |
| Msa.3154.1.S1_at    | Hypothetical protein                                        | -43.67 |
| Mtr.44648.1.S1_at   | Hypothetical protein                                        | -43.52 |
| Mtr.34220.1.S1_s_at | Hypothetical protein                                        | -43.38 |
| Mtr.8440.1.S1_at    | Salt-tolerance protein                                      | -43.37 |
| Msa.1197.1.S1_at    | Hypothetical protein                                        | -43.35 |
| Mtr.27898.1.S1_at   | Alanine aminotransferase                                    | -42.69 |
| Mtr.9709.1.S1_at    | Hypothetical protein                                        | -42.16 |
| Mtr.39524.1.S1_at   | Circadian clock associated1                                 | -42.12 |
| Mtr.16620.1.S1_s_at | Phosphoglycerate/bisphosphoglycerate mutase                 | -42.04 |
| Mtr.5348.1.S1_at    | Hypothetical protein                                        | -41.79 |
| Mtr.11985.1.S1_at   | Hypothetical protein                                        | -41.62 |
| Mtr.34856.1.S1_at   | Hypothetical protein                                        | -41.59 |
| Mtr.41515.1.S1_at   | Phosphate transporter                                       | -41.46 |
| Mtr.41843.1.S1_at   | Fimbrin                                                     | -41.29 |
| Mtr.46628.1.S1_s_at | Peroxidase                                                  | -41.10 |
| Mtr.37533.1.S1_at   | Fructose-1,6-bisphosphatase                                 | -41.03 |
| Mtr.22480.1.S1_s_at | Chloroplast mRNA-binding protein                            | -41.00 |
| Mtr.6704.1.S1_at    | Hypothetical protein                                        | -40.71 |
| Mtr.42665.1.S1_at   | Hypothetical protein                                        | -40.68 |
| Mtr.31606.1.S1_s_at | Phosphoethanolamine N-methyltransferase                     | -40.51 |
| Msa.1838.1.S1_s_at  | Hypothetical protein                                        | -40.33 |
| Mtr.14013.1.S1_at   | Transporter associated with antigen processing-like protein | -40.27 |
| Mtr.40921.1.S1_at   | Hypothetical protein                                        | -40.23 |
| Mtr.41715.1.S1_at   | Receptor protein-like                                       | -40.18 |
| Mtr.37609.1.S1_s_at | Hypothetical protein                                        | -40.10 |
| Mtr.24578.1.S1_s_at | Hypothetical protein                                        | -40.01 |
| Mtr.9273.1.S1_at    | Benzoyl coenzyme A                                          | -39.49 |
| Mtr.40742.1.S1_s_at | Thylakoid membrane phosphoprotein 14 kDa                    | -39.44 |
| Mtr.50844.1.S1_at   | PAP fibrillin                                               | -39.34 |
| Mtr.12138.1.S1_at   | Hypothetical protein                                        | -39.03 |
| Mtr.9477.1.S1_at    | Hypothetical protein                                        | -39.00 |
| Mtr.10124.1.S1_at   | Cytochrome P450                                             | -38.85 |
| Mtr.24918.1.S1_s_at | Receptor-like protein kinase                                | -38.76 |
| Mtr.34097.1.S1_at   | Sucrose-phosphate synthase 2                                | -38.71 |
| Mtr.37609.1.S1_at   | Hypothetical protein                                        | -38.66 |
| Mtr.41305.1.S1_at   | CPRD49 protein                                              | -38.57 |

|                     |                                            |        |
|---------------------|--------------------------------------------|--------|
| Mtr.43939.1.S1_s_at | Ribonuclease HIII                          | -38.48 |
| Msa.2951.1.S1_at    | Hypothetical protein                       | -38.41 |
| Mtr.10925.1.S1_at   | Hypothetical protein                       | -38.35 |
| Mtr.13190.1.S1_at   | Hypothetical protein                       | -38.26 |
| Mtr.50426.1.S1_at   | Lipoxygenase                               | -38.23 |
| Mtr.33651.1.S1_at   | Hypothetical protein                       | -38.06 |
| Mtr.5355.1.S1_at    | Hypothetical protein                       | -38.04 |
| Mtr.43717.1.S1_at   | Hypothetical protein                       | -37.99 |
| Mtr.6745.1.S1_s_at  | Violaxanthin de-epoxidase                  | -37.95 |
| Mtr.11810.1.S1_at   | Hypothetical protein                       | -37.86 |
| Mtr.46324.1.S1_at   | Hypothetical protein                       | -37.56 |
| Mtr.10830.1.S1_at   | Solaneyl diphosphate synthase              | -37.43 |
| Mtr.1073.1.S1_at    | Hypothetical protein                       | -37.38 |
| Mtr.41786.1.S1_at   | Hypothetical protein                       | -37.35 |
| Mtr.44475.1.S1_at   | Ultraviolet-B-repressible protein          | -37.33 |
| Mtr.8977.1.S1_at    | Pathogenesis-related protein               | -37.07 |
| Mtr.10820.1.S1_at   | Hypothetical protein                       | -36.87 |
| Mtr.21910.1.S1_at   | Trypsin protein inhibitor 2                | -36.76 |
| Mtr.32752.1.S1_s_at | Hypothetical protein                       | -36.73 |
| Mtr.45311.1.S1_at   | Hypothetical protein                       | -36.41 |
| Mtr.11069.1.S1_at   | Starch branching enzyme I                  | -36.20 |
| Mtr.4723.1.S1_at    | Hypothetical protein                       | -36.18 |
| Mtr.40848.1.S1_at   | Photosystem II protein X                   | -35.91 |
| Mtr.42241.1.S1_at   | Nodulin 26-like protein                    | -35.84 |
| Mtr.41360.1.S1_at   | Fimbrin-like protein                       | -35.65 |
| Msa.1383.1.S1_at    | Hypothetical protein                       | -35.60 |
| Mtr.38650.1.S1_at   | Anthocyanidin synthase                     | -35.56 |
| Mtr.10298.1.S1_at   | Photosystem II 22 kDa protein              | -35.51 |
| Mtr.10789.1.S1_at   | Chlorophyll a oxygenase                    | -35.49 |
| Mtr.47266.1.S1_at   | DNA-binding protein 4                      | -35.48 |
| Mtr.10797.1.S1_at   | Thylakoid membrane phosphoprotein 14 kDa   | -35.26 |
| Mtr.5344.1.S1_at    | Cellulose synthase                         | -35.07 |
| Mtr.24034.1.S1_s_at | Hypothetical protein                       | -35.04 |
| Msa.565.1.S1_at     | Hypothetical protein                       | -34.89 |
| Mtr.28829.1.S1_at   | Hypothetical protein                       | -34.88 |
| Mtr.12965.1.S1_at   | Hypothetical protein                       | -34.84 |
| Mtr.12028.1.S1_at   | Hypothetical protein                       | -34.69 |
| Mtr.10816.1.S1_at   | Hypothetical protein                       | -34.64 |
| Mtr.24825.1.S1_s_at | Cytochrome P450                            | -34.62 |
| Mtr.19547.1.S1_at   | Nucleoside phosphatase                     | -34.61 |
| Mtr.21416.1.S1_at   | Ribonuclease                               | -34.33 |
| Mtr.31205.1.S1_at   | Hypothetical protein                       | -34.28 |
| Mtr.10182.1.S1_at   | PREG1-like negative regulator-like protein | -34.23 |
| Mtr.43262.1.S1_at   | Hypothetical protein                       | -34.16 |
| Mtr.6657.1.S1_s_at  | Hypothetical protein                       | -34.13 |
| Mtr.43442.1.S1_at   | Hypothetical protein                       | -33.91 |
| Mtr.13704.1.S1_at   | Hypothetical protein                       | -33.81 |
| Mtr.46512.1.S1_at   | Alpha/beta-amyrin synthase                 | -33.66 |
| Mtr.8799.1.S1_at    | Raffinose synthase                         | -33.58 |
| Mtr.10911.1.S1_at   | Phenylpropanoid:glucosyltransferase 1      | -33.55 |
| Mtr.37335.1.S1_at   | Chlorophyll a/b-binding protein            | -33.54 |
| Msa.1851.1.S1_at    | Hypothetical protein                       | -33.51 |
| Mtr.24540.1.S1_s_at | Peroxidase                                 | -33.50 |
| Mtr.14356.1.S1_at   | Photosystem I reaction centre subunit IV   | -33.33 |

|                     |                                                            |        |
|---------------------|------------------------------------------------------------|--------|
| Mtr.43317.1.S1_s_at | Photosystem II core complex proteins psbY                  | -33.05 |
| Mtr.10377.1.S1_at   | Hypothetical protein                                       | -33.01 |
| Mtr.5633.1.S1_at    | Esterase/lipase/thioesterase                               | -32.98 |
| Mtr.34115.1.S1_at   | Hypothetical protein                                       | -32.97 |
| Mtr.20297.1.S1_at   | Lipocalin                                                  | -32.88 |
| Mtr.22060.1.S1_at   | Alanine aminotransferase                                   | -32.80 |
| Mtr.11603.1.S1_at   | Non-phototropic hypocotyl-like protein                     | -32.69 |
| Msa.1752.1.S1_at    | Hypothetical protein                                       | -32.66 |
| Mtr.44732.1.S1_at   | GDSL-motif lipase/hydrolase                                | -32.57 |
| Mtr.28584.1.S1_s_at | Hypothetical protein                                       | -32.56 |
| Mtr.49640.1.S1_at   | Hypothetical protein                                       | -32.45 |
| Mtr.11545.1.S1_at   | Hypothetical protein                                       | -32.43 |
| Mtr.7344.1.S1_at    | Hypothetical protein                                       | -32.33 |
| Mtr.16620.1.S1_at   | Phosphoglycerate/bisphosphoglycerate mutase                | -32.29 |
| Mtr.33459.1.S1_s_at | Hypothetical protein                                       | -32.16 |
| Mtr.9185.1.S1_at    | Prephenate dehydratase                                     | -32.08 |
| Mtr.12160.1.S1_at   | Mitochondrial carnitine/acylcarnitine carrier-like protein | -32.04 |
| Mtr.40246.1.S1_at   | Hypothetical protein                                       | -31.98 |
| Mtr.17364.1.S1_at   | D-galactoside/L-rhamnose binding SUEL lectin               | -31.85 |
| Msa.1913.1.S1_at    | Hypothetical protein                                       | -31.83 |
| Msa.2574.1.S1_at    | Hypothetical protein                                       | -31.79 |
| Mtr.7512.1.S1_at    | Hypothetical protein                                       | -31.70 |
| Mtr.47629.1.S1_at   | Aldo/keto reductase                                        | -31.55 |
| Mtr.43295.1.S1_at   | Hypothetical protein                                       | -31.49 |
| Mtr.11664.1.S1_at   | MYB transcription factor                                   | -31.30 |
| Mtr.18757.1.S1_at   | Sulfate transporter                                        | -31.26 |
| Mtr.18560.1.S1_at   | dTDP-glucose 4-6-dehydratase                               | -31.22 |
| Mtr.34850.1.S1_s_at | Hypothetical protein                                       | -31.20 |
| Mtr.21257.1.S1_at   | Late embryogenesis abundant protein                        | -31.05 |
| Mtr.25935.1.S1_at   | Auxin-induced protein 15A                                  | -30.87 |
| Mtr.44534.1.S1_at   | Hypothetical protein                                       | -30.77 |
| Mtr.25652.1.S1_at   | Cell-wall P4 protein                                       | -30.74 |
| Mtr.44640.1.S1_at   | Hypothetical protein                                       | -30.67 |
| Mtr.8659.1.S1_s_at  | Beta-galactosidase                                         | -30.66 |
| Msa.1549.1.S1_at    | Hypothetical protein                                       | -30.59 |
| Mtr.43381.1.S1_at   | Hypothetical protein                                       | -30.58 |
| Mtr.39886.1.S1_at   | Hypothetical protein                                       | -30.55 |
| Mtr.21256.1.S1_at   | Late embryogenesis abundant protein                        | -30.51 |
| Mtr.5594.1.S1_at    | Ca <sup>2+</sup> /H <sup>+</sup> exchanger                 | -30.42 |
| Mtr.32904.1.S1_s_at | Phosphoglycerate kinase                                    | -30.39 |
| Mtr.7091.1.S1_at    | Zinc-finger-like protein                                   | -30.33 |
| Mtr.47934.1.S1_at   | Amino acid permease 6                                      | -30.14 |
| Mtr.40994.1.S1_at   | ABC transporter                                            | -30.01 |
| Mtr.24189.1.S1_s_at | Fatty acid desaturase                                      | -29.99 |
| Mtr.10982.1.S1_at   | Serine/threonine-specific protein kinase                   | -29.94 |
| Mtr.32479.1.S1_at   | Phosphoribosylaminoimidazolecarboxamide formyltransferase  | -29.80 |
| Msa.1550.1.S1_at    | Hypothetical protein                                       | -29.62 |
| Mtr.28616.1.S1_at   | ABC transporter                                            | -29.32 |
| Msa.1096.1.S1_at    | Hypothetical protein                                       | -29.29 |
| Mtr.44488.1.S1_at   | Hypothetical protein                                       | -29.27 |
| Mtr.49062.1.S1_at   | Heat shock protein DnaJ                                    | -29.26 |
| Mtr.22140.1.S1_at   | Glycosyltransferase                                        | -29.18 |
| Mtr.36794.1.S1_at   | Hypothetical protein                                       | -28.91 |
| Mtr.39379.1.S1_at   | Amino acid permease 6                                      | -28.89 |



|                     |                                                              |        |
|---------------------|--------------------------------------------------------------|--------|
| Mtr.9354.1.S1_at    | ADP-glucose pyrophosphorylase                                | -28.78 |
| Msa.3176.1.S1_at    | Hypothetical protein                                         | -28.68 |
| Mtr.12305.1.S1_at   | Chlorophyll a/b-binding protein CP24                         | -28.57 |
| Mtr.37297.1.S1_at   | Plastidic aldolase                                           | -28.55 |
| Mtr.51080.1.S1_at   | Phospholipid/glycerol acyltransferase                        | -28.45 |
| Mtr.9187.1.S1_at    | Hypothetical protein                                         | -28.45 |
| Mtr.6517.1.S1_at    | Flavonoid 3'-hydroxylase                                     | -28.45 |
| Mtr.33577.1.S1_at   | Starch branching enzyme I                                    | -28.39 |
| Mtr.37529.1.S1_at   | Magnesium chelatase                                          | -28.38 |
| Mtr.14782.1.S1_at   | Isopenicillin N synthase                                     | -28.29 |
| Mtr.32687.1.S1_at   | Hypothetical protein                                         | -28.26 |
| Mtr.27626.1.S1_s_at | Hypothetical protein                                         | -28.23 |
| Mtr.10566.1.S1_at   | Hypothetical protein                                         | -28.18 |
| Mtr.36871.1.S1_at   | Calcium-dependent protein kinase                             | -28.16 |
| Mtr.6753.1.S1_at    | Hypothetical protein                                         | -28.11 |
| Mtr.3123.1.S1_at    | Hypothetical protein                                         | -28.10 |
| Mtr.25935.1.S1_x_at | Auxin-induced protein 15A                                    | -28.10 |
| Mtr.42339.1.S1_at   | Hypothetical protein                                         | -28.00 |
| Mtr.10377.1.S1_s_at | Hypothetical protein                                         | -27.96 |
| Mtr.41746.1.S1_at   | DnaJ domain protein                                          | -27.95 |
| Mtr.20948.1.S1_s_at | Membrane located receptor-like protein                       | -27.91 |
| Mtr.37632.1.S1_at   | Tetrapyrrole-binding protein                                 | -27.88 |
| Mtr.33008.1.S1_at   | Hypothetical protein                                         | -27.88 |
| Mtr.9780.1.S1_at    | Subtilisin-like protease                                     | -27.59 |
| Mtr.38920.1.S1_s_at | NFU3 protein                                                 | -27.47 |
| Mtr.28243.1.S1_at   | Hypothetical protein                                         | -27.47 |
| Mtr.22013.1.S1_s_at | Peroxiredoxin Q                                              | -27.32 |
| Mtr.9248.1.S1_at    | Hypothetical protein                                         | -27.27 |
| Mtr.10927.1.S1_at   | Regulator of chromosome condensation-like protein            | -27.20 |
| Mtr.34779.1.S1_at   | GDSL-motif lipase/hydrolase                                  | -27.13 |
| Mtr.34481.1.S1_at   | Abnormal spindle-like protein                                | -27.01 |
| Mtr.1392.1.S1_s_at  | Hypothetical protein                                         | -26.95 |
| Mtr.4580.1.S1_at    | ABC transporter                                              | -26.86 |
| Mtr.12026.1.S1_at   | Hypothetical protein                                         | -26.81 |
| Mtr.38370.1.S1_s_at | Hypothetical protein                                         | -26.65 |
| Mtr.42567.1.S1_at   | Phantastica transcription factor                             | -26.62 |
| Mtr.34852.1.S1_at   | Raucaffricine-O-beta-D-glucosidase                           | -26.59 |
| Mtr.31792.1.S1_at   | Hypothetical protein                                         | -26.59 |
| Mtr.41363.1.S1_at   | Immunophilin / FKBP-type peptidyl-prolyl cis-trans isomerase | -26.59 |
| Mtr.43702.1.S1_s_at | Thylakoid luminal protein                                    | -26.43 |
| Mtr.20149.1.S1_at   | Hypothetical protein                                         | -26.36 |
| Mtr.26958.1.S1_at   | Hypothetical protein                                         | -26.36 |
| Mtr.11283.1.S1_at   | Hypothetical protein                                         | -26.36 |
| Mtr.18579.1.S1_at   | Myb, DNA-binding                                             | -26.23 |
| Mtr.37883.1.S1_at   | Hypothetical protein                                         | -26.15 |
| Mtr.9564.1.S1_at    | FKBP like protein                                            | -26.07 |
| Mtr.35826.1.S1_at   | Hypothetical protein                                         | -26.05 |
| Mtr.51510.1.S1_at   | Hypothetical protein                                         | -25.96 |
| Mtr.11963.1.S1_s_at | Sulphate transporter                                         | -25.91 |
| Mtr.17316.1.S1_at   | Generic methyltransferase                                    | -25.87 |
| Mtr.40462.1.S1_at   | Hypothetical protein                                         | -25.85 |
| Mtr.4339.1.S1_at    | Hypothetical protein                                         | -25.76 |
| Msa.2685.1.S1_at    | Hypothetical protein                                         | -25.69 |
| Mtr.32990.1.S1_at   | Non-phototropic hypocotyl-like protein                       | -25.48 |

|                     |                                                     |        |
|---------------------|-----------------------------------------------------|--------|
| Mtr.18023.1.S1_at   | Ferredoxin                                          | -25.44 |
| Mtr.4947.1.S1_at    | Cytochrome P-450                                    | -25.23 |
| Mtr.38433.1.S1_at   | Hypothetical protein                                | -25.22 |
| Mtr.31215.1.S1_s_at | Hypothetical protein                                | -25.11 |
| Mtr.44109.1.S1_at   | Nitrate transporter                                 | -25.08 |
| Mtr.8637.1.S1_at    | Hypothetical protein                                | -25.08 |
| Mtr.33061.1.S1_at   | Hypothetical protein                                | -25.01 |
| Mtr.14083.1.S1_at   | Hypothetical protein                                | -24.96 |
| Mtr.10840.1.S1_at   | Hypothetical protein                                | -24.76 |
| Mtr.33659.1.S1_at   | Hypothetical protein                                | -24.74 |
| Mtr.2101.1.S1_at    | Hypothetical protein                                | -24.72 |
| Mtr.40092.1.S1_at   | Dehydroascorbate reductase                          | -24.68 |
| Mtr.39747.1.S1_at   | UDP-glucose:flavonoid 3-O-glucosyltransferase       | -24.62 |
| Mtr.41722.1.S1_at   | Hypothetical protein                                | -24.53 |
| Mtr.21118.1.S1_at   | Hypothetical protein                                | -24.53 |
| Mtr.34490.1.S1_at   | Hypothetical protein                                | -24.45 |
| Mtr.43480.1.S1_at   | Hypothetical protein                                | -24.44 |
| Mtr.36842.1.S1_s_at | Nodulin 26-like protein                             | -24.34 |
| Mtr.27626.1.S1_at   | Hypothetical protein                                | -24.30 |
| Mtr.11236.1.S1_at   | UDP-glucosyltransferase                             | -24.30 |
| Mtr.12445.1.S1_at   | Hypothetical protein                                | -24.25 |
| Mtr.49762.1.S1_at   | Elongation factor g                                 | -24.22 |
| Mtr.42596.1.S1_at   | LLS1-like protein                                   | -24.20 |
| Mtr.48257.1.S1_at   | Hypothetical protein                                | -24.20 |
| Msa.2533.1.S1_at    | Hypothetical protein                                | -24.07 |
| Mtr.22279.1.S1_at   | Hypothetical protein                                | -24.05 |
| Mtr.33696.1.S1_at   | 4-coumarate-CoA ligase                              | -24.05 |
| Mtr.49764.1.S1_at   | Auxin Efflux Carrier                                | -24.04 |
| Mtr.10013.1.S1_at   | Hypothetical protein                                | -23.71 |
| Mtr.37608.1.S1_at   | Hypothetical protein                                | -23.67 |
| Mtr.42925.1.S1_s_at | Ribulose biphosphate carboxylase/oxygenase activase | -23.66 |
| Mtr.49641.1.S1_at   | Hypothetical protein                                | -23.63 |
| Mtr.42918.1.S1_at   | Protein disulfide isomerase                         | -23.60 |
| Mtr.37228.1.S1_at   | UDP-glycose:flavonoid glycosyltransferase           | -23.59 |
| Mtr.34693.1.S1_at   | Hypothetical protein                                | -23.55 |
| Mtr.44580.1.S1_at   | Hypothetical protein                                | -23.53 |
| Mtr.31791.1.S1_at   | Hypothetical protein                                | -23.51 |
| Mtr.38366.1.S1_at   | Hypothetical protein                                | -23.42 |
| Mtr.13968.1.S1_at   | GH3-like protein                                    | -23.35 |
| Mtr.49839.1.S1_x_at | Hypothetical protein                                | -23.31 |
| Mtr.31754.1.S1_x_at | Isoflavonoid glucosyltransferase                    | -23.30 |
| Mtr.5651.1.S1_at    | Hypothetical protein                                | -23.25 |
| Mtr.13096.1.S1_at   | Hypothetical protein                                | -23.25 |
| Mtr.46159.1.S1_at   | bZIP transcription factor                           | -23.08 |
| Mtr.10441.1.S1_at   | mRNA-binding protein                                | -22.77 |
| Mtr.5310.1.S1_s_at  | Light harvesting protein                            | -22.74 |
| Mtr.33489.1.S1_at   | ABC transporter                                     | -22.72 |
| Mtr.13817.1.S1_at   | AX110P-like protein                                 | -22.68 |
| Mtr.32665.1.S1_s_at | Myo-inositol-1-phosphate synthase                   | -22.62 |
| Mtr.41073.1.S1_at   | FPF1 protein                                        | -22.60 |
| Mtr.31754.1.S1_at   | Isoflavonoid glucosyltransferase                    | -22.47 |
| Mtr.33723.1.S1_at   | Hypothetical protein                                | -22.43 |
| Mtr.18406.1.S1_at   | Hypothetical protein                                | -22.41 |
| Mtr.35838.1.S1_at   | Nitrate transporter                                 | -22.35 |

|                     |                                                            |        |
|---------------------|------------------------------------------------------------|--------|
| Mtr.13203.1.S1_at   | Thylakoid luminal 29.8 kDa protein                         | -22.32 |
| Mtr.12202.1.S1_at   | Ribulose 1,5-bisphosphate carboxylase small subunit        | -22.28 |
| Mtr.41275.1.S1_at   | Kinesin-like protein                                       | -22.11 |
| Mtr.13996.1.S1_at   | Hypothetical protein                                       | -22.02 |
| Mtr.11271.1.S1_at   | Hypothetical protein                                       | -22.00 |
| Mtr.48595.1.S1_at   | Hypothetical protein                                       | -21.99 |
| Mtr.2073.1.S1_at    | Copper/topa quinone amine oxidase                          | -21.96 |
| Mtr.37662.1.S1_at   | Proline-rich family protein                                | -21.92 |
| Msa.1254.1.S1_at    | Hypothetical protein                                       | -21.83 |
| Mtr.29089.1.S1_s_at | Peroxidase                                                 | -21.76 |
| Mtr.27575.1.S1_at   | Nitrate transporter                                        | -21.68 |
| Mtr.13401.1.S1_at   | Hypothetical protein                                       | -21.60 |
| Mtr.37245.1.S1_at   | Chlorophyll a-b binding protein                            | -21.59 |
| Mtr.30739.1.S1_s_at | Hypothetical protein                                       | -21.59 |
| Mtr.10828.1.S1_at   | Glucosyltransferase-13                                     | -21.58 |
| Mtr.40632.1.S1_at   | Hypothetical protein                                       | -21.53 |
| Mtr.19937.1.S1_at   | Elongation factor G                                        | -21.49 |
| Mtr.13356.1.S1_at   | Allene oxide cyclase C4                                    | -21.46 |
| Mtr.34625.1.S1_at   | Cytochrome P450 71A6                                       | -21.44 |
| Mtr.26786.1.S1_at   | Hypothetical protein                                       | -21.27 |
| Mtr.12295.1.S1_at   | Inorganic pyrophosphatase-like protein                     | -21.22 |
| Mtr.42609.1.S1_at   | Hypothetical protein                                       | -21.18 |
| Mtr.32336.1.S1_at   | Cytochrome P450 71A21                                      | -21.15 |
| Mtr.2893.1.S1_at    | Hypothetical protein                                       | -21.15 |
| Mtr.45559.1.S1_at   | ARK2 product/receptor-like serine/threonine protein kinase | -21.08 |
| Mtr.36690.1.S1_at   | GH3-like protein                                           | -21.06 |
| Mtr.25285.1.S1_at   | Symbiotic ammonium transporter                             | -21.05 |
| Mtr.50822.1.S1_x_at | Chlorophyll A-B binding protein                            | -21.00 |
| Mtr.21054.1.S1_at   | Mitochondrial transcription termination factor             | -20.92 |
| Mtr.5804.1.S1_at    | Hypothetical protein                                       | -20.90 |
| Mtr.37286.1.S1_at   | Furostanol glycoside 26-O-beta-glucosidase                 | -20.87 |
| Msa.1688.1.S1_at    | Hypothetical protein                                       | -20.87 |
| Mtr.12909.1.S1_at   | Hypothetical protein                                       | -20.76 |
| Mtr.12056.1.S1_s_at | Cytochrome P450                                            | -20.76 |
| Mtr.47958.1.S1_at   | Hypothetical protein                                       | -20.72 |
| Mtr.43727.1.S1_s_at | Squalene monooxygenase 1                                   | -20.70 |
| Mtr.48892.1.S1_at   | Hypothetical protein                                       | -20.70 |
| Msa.3166.1.S1_at    | Hypothetical protein                                       | -20.68 |
| Msa.3115.1.S1_at    | Hypothetical protein                                       | -20.64 |
| Mtr.14704.1.S1_at   | Carbamoyl-phosphate synthase                               | -20.61 |
| Mtr.43628.1.S1_at   | Isoflavonoid glucosyltransferase                           | -20.59 |
| Mtr.27854.1.S1_at   | NADP-dependent oxidoreductase P1                           | -20.55 |
| Mtr.40691.1.S1_at   | Lipoxygenase                                               | -20.46 |
| Mtr.46540.1.S1_at   | CP12                                                       | -20.42 |
| Mtr.27388.1.S1_s_at | Rubisco activase                                           | -20.39 |
| Mtr.11326.1.S1_at   | Leaf senescence protein                                    | -20.38 |
| Mtr.43610.1.S1_at   | Hypothetical protein                                       | -20.31 |
| Mtr.13324.1.S1_at   | Hypothetical protein                                       | -20.30 |
| Mtr.11477.1.S1_at   | PsbP protein                                               | -20.28 |
| Mtr.15413.1.S1_at   | Haloacid dehalogenase                                      | -20.25 |
| Mtr.6743.1.S1_at    | 2-oxoglutarate/malate translocator                         | -20.22 |
| Mtr.10946.1.S1_at   | Hypothetical protein                                       | -20.21 |
| Mtr.15285.1.S1_at   | Myo-inositol-1-phosphate synthase                          | -20.20 |
| Msa.1916.1.S1_at    | Hypothetical protein                                       | -20.20 |

|                     |                                                   |        |
|---------------------|---------------------------------------------------|--------|
| Mtr.38371.1.S1_at   | Hypothetical protein                              | -20.18 |
| Msa.1822.1.S1_at    | Hypothetical protein                              | -20.13 |
| Mtr.24508.1.S1_at   | Hypothetical protein                              | -20.10 |
| Mtr.21535.1.S1_at   | Serine/threonine protein kinase                   | -20.04 |
| Mtr.44312.1.S1_at   | Hypothetical protein                              | -20.03 |
| Mtr.43075.1.S1_at   | Cyanogenic Beta-Glucosidase                       | -20.01 |
| Msa.3042.1.S1_s_at  | Hypothetical protein                              | -20.00 |
| Mtr.20943.1.S1_at   | Serine/threonine protein kinase                   | -19.91 |
| Mtr.21006.1.S1_at   | Hypothetical protein                              | -19.84 |
| Mtr.27619.1.S1_at   | Hypothetical protein                              | -19.82 |
| Mtr.32939.1.S1_at   | Hypothetical protein                              | -19.81 |
| Mtr.18997.1.S1_at   | Zn-finger, Dof type                               | -19.81 |
| Mtr.47158.1.S1_s_at | Hypothetical protein                              | -19.67 |
| Mtr.6714.1.S1_at    | Hypothetical protein                              | -19.66 |
| Mtr.3942.1.S1_at    | Hypothetical protein                              | -19.51 |
| Mtr.41693.1.S1_at   | CND41, chloroplast nucleoid DNA binding protein   | -19.41 |
| Mtr.20116.1.S1_s_at | Hypothetical protein                              | -19.39 |
| Mtr.51059.1.S1_x_at | E-class P450                                      | -19.37 |
| Mtr.37042.1.S1_at   | Hypothetical protein                              | -19.36 |
| Mtr.5369.1.S1_at    | Nitrate transporter                               | -19.33 |
| Mtr.48723.1.S1_at   | Hypothetical protein                              | -19.32 |
| Mtr.14762.1.S1_at   | Flavoprotein monooxygenase                        | -19.32 |
| Mtr.11295.1.S1_at   | Transport protein                                 | -19.31 |
| Msa.1384.1.S1_at    | Hypothetical protein                              | -19.31 |
| Mtr.45060.1.S1_at   | Salt-tolerance protein                            | -19.25 |
| Mtr.40788.1.S1_at   | Hypothetical protein                              | -19.10 |
| Mtr.11524.1.S1_at   | Hypothetical protein                              | -19.00 |
| Mtr.38923.1.S1_at   | Cytoplasmic intermediate filament protein         | -18.93 |
| Mtr.20727.1.S1_at   | Aldehyde dehydrogenase                            | -18.91 |
| Mtr.13781.1.S1_at   | Hypothetical protein                              | -18.85 |
| Mtr.43375.1.S1_at   | Hypothetical protein                              | -18.84 |
| Mtr.35200.1.S1_at   | Elongation factor 1 alpha                         | -18.84 |
| Mtr.38889.1.S1_at   | Metacaspase 3                                     | -18.81 |
| Mtr.22257.1.S1_s_at | Hypothetical protein                              | -18.78 |
| Mtr.5368.1.S1_at    | Chlorophyll a/b-binding protein                   | -18.77 |
| Mtr.6033.1.S1_at    | Peroxidase                                        | -18.77 |
| Mtr.32922.1.S1_at   | Amino acid transporter                            | -18.76 |
| Mtr.10844.1.S1_at   | Peroxiredoxin Q                                   | -18.72 |
| Mtr.14906.1.S1_at   | Major intrinsic protein                           | -18.69 |
| Mtr.5621.1.S1_at    | Hypothetical protein                              | -18.65 |
| Mtr.44339.1.S1_at   | Hypothetical protein                              | -18.64 |
| Mtr.12060.1.S1_at   | Annexin                                           | -18.62 |
| Mtr.24823.1.S1_at   | Hypothetical protein                              | -18.55 |
| Mtr.28742.1.S1_at   | Very-long-chain fatty acid condensing enzyme CUT1 | -18.50 |
| Mtr.14011.1.S1_at   | Hypothetical protein                              | -18.46 |
| Mtr.8269.1.S1_at    | Hypothetical protein                              | -18.43 |
| Mtr.6693.1.S1_s_at  | NFU3 protein                                      | -18.42 |
| Mtr.20846.1.S1_at   | MtN3 and saliva related transmembrane protein     | -18.36 |
| Mtr.8426.1.S1_at    | Chlorophyll a/b binding protein                   | -18.30 |
| Mtr.7085.1.S1_at    | Fatty acid elongase                               | -18.28 |
| Mtr.40597.1.S1_at   | Seed maturation protein                           | -18.27 |
| Mtr.32162.1.S1_at   | Hypothetical protein                              | -18.25 |
| Mtr.51345.1.S1_at   | Hypothetical protein                              | -18.25 |
| Mtr.45678.1.S1_at   | SAM (and some other nucleotide) binding protein   | -18.24 |

|                     |                                                         |        |
|---------------------|---------------------------------------------------------|--------|
| Mtr.3259.1.S1_at    | Hypothetical protein                                    | -18.24 |
| Mtr.20033.1.S1_at   | Hypothetical protein                                    | -18.23 |
| Mtr.12900.1.S1_at   | Iron reductase                                          | -18.21 |
| Mtr.13434.1.S1_at   | Peroxisomal membrane protein                            | -18.19 |
| Mtr.48150.1.S1_s_at | Hypothetical protein                                    | -18.17 |
| Mtr.42753.1.S1_at   | Hypothetical protein                                    | -18.09 |
| Mtr.38087.1.S1_at   | Hyoscyamine 6 beta-hydroxylase                          | -18.06 |
| Mtr.37623.1.S1_at   | 3-beta-hydroxysteroiddehydrogenase                      | -18.03 |
| Mtr.31606.1.S1_at   | Phosphoethanolamine N-methyltransferase                 | -18.03 |
| Mtr.43709.1.S1_at   | Starch synthase isoform SS III                          | -17.99 |
| Mtr.14112.1.S1_s_at | PAP fibrillin                                           | -17.94 |
| Mtr.45561.1.S1_at   | 4-coumarate-CoA ligase                                  | -17.94 |
| Msa.1863.1.S1_at    | Hypothetical protein                                    | -17.92 |
| Mtr.37210.1.S1_at   | Chlorophyll a-b binding protein                         | -17.91 |
| Msa.2778.1.S1_at    | Hypothetical protein                                    | -17.85 |
| Mtr.43044.1.S1_at   | NADP-dependent glyceraldehyde-3-phosphate dehydrogenase | -17.85 |
| Mtr.45032.1.S1_at   | Squalene epoxidase                                      | -17.82 |
| Mtr.12543.1.S1_at   | Early nodulin-like protein 2                            | -17.81 |
| Mtr.5960.1.S1_s_at  | Hypothetical protein                                    | -17.80 |
| Mtr.6752.1.S1_at    | 10 kDa photosystem II polypeptide                       | -17.77 |
| Mtr.27132.1.S1_s_at | Histidine-containing phosphotransfer protein            | -17.77 |
| Mtr.14592.1.S1_at   | Peroxidase                                              | -17.76 |
| Mtr.9624.1.S1_at    | ABC transporter                                         | -17.76 |
| Mtr.13248.1.S1_at   | Protein kinase                                          | -17.70 |
| Mtr.39379.1.S1_s_at | Amino acid permease 6                                   | -17.64 |
| Mtr.42369.1.S1_at   | Hypothetical protein                                    | -17.62 |
| Mtr.6709.1.S1_at    | Hypothetical protein                                    | -17.57 |
| Mtr.35044.1.S1_at   | Nine-cis-epoxycarotenoid dioxygenase2                   | -17.55 |
| Msa.3147.1.S1_at    | Hypothetical protein                                    | -17.54 |
| Mtr.44975.1.S1_at   | ABC transporter                                         | -17.51 |
| Mtr.40755.1.S1_at   | ERD7 protein                                            | -17.50 |
| Mtr.11302.1.S1_at   | Glycosyl hydrolase                                      | -17.47 |
| Msa.1086.1.S1_at    | Hypothetical protein                                    | -17.47 |
| Msa.941.1.S1_at     | Hypothetical protein                                    | -17.44 |
| Mtr.40667.1.S1_at   | Abscisic acid-induced-like protein                      | -17.43 |
| Mtr.49516.1.S1_at   | Gigantea protein                                        | -17.43 |
| Mtr.5570.1.S1_at    | Plasma membrane sulphate transporter                    | -17.41 |
| Mtr.10464.1.S1_at   | Phosphoribulokinase                                     | -17.38 |
| Mtr.27878.1.S1_at   | Isoflavone reductase                                    | -17.33 |
| Mtr.41919.1.S1_s_at | Hypothetical protein                                    | -17.32 |
| Mtr.49786.1.S1_x_at | Glycosyl hydrolases                                     | -17.31 |
| Mtr.39126.1.S1_at   | Hypothetical protein                                    | -17.30 |
| Mtr.24883.1.S1_at   | Hypothetical protein                                    | -17.29 |
| Mtr.33459.1.S1_at   | Hypothetical protein                                    | -17.26 |
| Mtr.13143.1.S1_at   | Starch synthase isoform SS III                          | -17.25 |
| Mtr.4983.1.S1_at    | Hypothetical protein                                    | -17.25 |
| Mtr.20386.1.S1_s_at | Hemopexin                                               | -17.25 |
| Mtr.10630.1.S1_at   | Nonspecific lipid-transfer protein 2                    | -17.21 |
| Mtr.9205.1.S1_at    | Hypothetical protein                                    | -17.19 |
| Mtr.12964.1.S1_at   | Hypothetical protein                                    | -17.17 |
| Mtr.11503.1.S1_at   | Cold acclimation protein                                | -17.17 |
| Mtr.5418.1.S1_at    | Magnesium transporter                                   | -17.13 |
| Mtr.7842.1.S1_at    | Hypothetical protein                                    | -17.09 |
| Mtr.21616.1.S1_at   | Hypothetical protein                                    | -17.02 |

|                     |                                               |        |
|---------------------|-----------------------------------------------|--------|
| Mtr.10289.1.S1_at   | SANT/MYB domain protein                       | -17.00 |
| Mtr.38165.1.S1_at   | Serine/threonine protein kinase               | -16.99 |
| Msa.1809.1.S1_at    | Hypothetical protein                          | -16.99 |
| Mtr.14527.1.S1_at   | Hypothetical protein                          | -16.98 |
| Msa.1732.1.S1_at    | Hypothetical protein                          | -16.94 |
| Mtr.12736.1.S1_at   | Hypothetical protein                          | -16.93 |
| Mtr.29086.1.S1_at   | Hypothetical protein                          | -16.92 |
| Mtr.7389.1.S1_at    | Yippee-like protein                           | -16.89 |
| Mtr.48146.1.S1_s_at | Boron transporter                             | -16.89 |
| Mtr.20226.1.S1_at   | UDP-glucuronosyl/UDP-glucosyltransferase      | -16.79 |
| Mtr.12624.1.S1_at   | ABC1 family protein                           | -16.78 |
| Mtr.11536.1.S1_at   | SOS2-like protein kinase PKS3                 | -16.76 |
| Mtr.42075.1.S1_at   | Cytochrome P450                               | -16.72 |
| Mtr.43919.1.S1_at   | Two-component response regulator-like APRR7   | -16.71 |
| Mtr.37463.1.S1_at   | CesA2                                         | -16.69 |
| Mtr.49774.1.S1_at   | Auxin responsive SAUR                         | -16.68 |
| Mtr.43683.1.S1_at   | Protein phosphatase 2C                        | -16.67 |
| Mtr.12722.1.S1_at   | Hypothetical protein                          | -16.65 |
| Mtr.45292.1.S1_at   | Hypothetical protein                          | -16.63 |
| Mtr.37624.1.S1_s_at | 3-beta-hydroxysteroiddehydrogenase            | -16.60 |
| Mtr.4029.1.S1_at    | CTF2A                                         | -16.59 |
| Mtr.26473.1.S1_at   | Isoamylase                                    | -16.56 |
| Mtr.8811.1.S1_at    | Hypothetical protein                          | -16.55 |
| Msa.3135.1.S1_at    | Hypothetical protein                          | -16.54 |
| Mtr.10192.1.S1_at   | DREB-like protein                             | -16.53 |
| Mtr.43701.1.S1_at   | Thylakoid lumenal protein                     | -16.50 |
| Msa.2424.1.S1_at    | Hypothetical protein                          | -16.49 |
| Mtr.9467.1.S1_at    | Glutaredoxin                                  | -16.48 |
| Mtr.29595.1.S1_at   | Hypothetical protein                          | -16.48 |
| Mtr.20847.1.S1_at   | MtN3 and saliva related transmembrane protein | -16.46 |
| Mtr.25633.1.S1_at   | 2-Cys peroxiredoxin                           | -16.46 |
| Mtr.46511.1.S1_at   | Alpha/beta-amyrin synthase                    | -16.46 |
| Mtr.50822.1.S1_at   | Chlorophyll A-B binding protein               | -16.45 |
| Mtr.41759.1.S1_at   | Rac GTPase activating protein                 | -16.43 |
| Mtr.12720.1.S1_at   | Lipoxygenase                                  | -16.43 |
| Mtr.16791.1.S1_s_at | Thylakoid lumen protein                       | -16.42 |
| Mtr.39712.1.S1_at   | Rac GTPase activating protein 3               | -16.39 |
| Mtr.51399.1.S1_at   | Hypothetical protein                          | -16.31 |
| Mtr.5490.1.S1_at    | Hypothetical protein                          | -16.27 |
| Mtr.6744.1.S1_at    | Hypothetical protein                          | -16.22 |
| Mtr.38438.1.S1_at   | APG1                                          | -16.16 |
| Mtr.5325.1.S1_at    | Hypothetical protein                          | -16.12 |
| Mtr.250.1.S1_at     | Hypothetical protein                          | -16.04 |
| Mtr.34428.1.S1_s_at | Glyceraldehyde-3-phosphate dehydrogenase B    | -16.03 |
| Mtr.33622.1.S1_at   | Dehydration-responsive family protein         | -15.99 |
| Mtr.5305.1.S1_at    | Cytochrome P450                               | -15.94 |
| Mtr.4339.1.S1_s_at  | Hypothetical protein                          | -15.82 |
| Mtr.39266.1.S1_at   | Cation diffusion facilitator 9                | -15.80 |
| Mtr.41681.1.S1_at   | Phosphoglycerate kinase                       | -15.78 |
| Mtr.2200.1.S1_at    | Hypothetical protein                          | -15.77 |
| Mtr.10992.1.S1_at   | Arabinogalactan protein-like protein          | -15.71 |
| Mtr.40866.1.S1_at   | Hydrolase-like protein                        | -15.71 |
| Mtr.19622.1.S1_s_at | Hypothetical protein                          | -15.67 |
| Mtr.6878.1.S1_s_at  | Hypothetical protein                          | -15.67 |

|                     |                                                                        |        |
|---------------------|------------------------------------------------------------------------|--------|
| Mtr.44856.1.S1_at   | Beta-amylase                                                           | -15.64 |
| Mtr.11662.1.S1_at   | Hypothetical protein                                                   | -15.63 |
| Mtr.20298.1.S1_at   | Hypothetical protein                                                   | -15.60 |
| Mtr.13958.1.S1_at   | Beta-amylase                                                           | -15.59 |
| Mtr.41129.1.S1_s_at | Hypothetical protein                                                   | -15.58 |
| Mtr.47933.1.S1_at   | Amino acid transporter                                                 | -15.47 |
| Mtr.6877.1.S1_at    | Drought responsive element binding protein                             | -15.45 |
| Mtr.32662.1.S1_at   | Beta-amylase                                                           | -15.45 |
| Msa.3182.1.S1_at    | Hypothetical protein                                                   | -15.44 |
| Mtr.27885.1.S1_s_at | Hypothetical protein                                                   | -15.40 |
| Mtr.17489.1.S1_at   | Hypothetical protein                                                   | -15.39 |
| Mtr.48925.1.S1_at   | Hypothetical protein                                                   | -15.38 |
| Mtr.42178.1.S1_at   | Starch synthase I                                                      | -15.38 |
| Mtr.32351.1.S1_s_at | Hypothetical protein                                                   | -15.36 |
| Mtr.50516.1.S1_at   | Deoxyribodipyrimidine photolyase                                       | -15.36 |
| Mtr.10972.1.S1_at   | Hypothetical protein                                                   | -15.35 |
| Mtr.33019.1.S1_at   | Hypothetical protein                                                   | -15.35 |
| Mtr.23337.1.S1_at   | Nonphototrophic hypocotyl 1b                                           | -15.31 |
| Mtr.43994.1.S1_at   | Hypothetical protein                                                   | -15.30 |
| Mtr.32213.1.S1_at   | Nitrite transport protein                                              | -15.28 |
| Mtr.9137.1.S1_at    | Hypothetical protein                                                   | -15.25 |
| Mtr.40706.1.S1_s_at | ADP-glucose pyrophosphorylase large subunit                            | -15.25 |
| Msa.928.1.S1_at     | Hypothetical protein                                                   | -15.24 |
| Mtr.37245.1.S1_s_at | Chlorophyll a-b binding protein                                        | -15.23 |
| Mtr.46001.1.S1_s_at | Hypothetical protein                                                   | -15.22 |
| Mtr.39718.1.S1_at   | Hypothetical protein                                                   | -15.20 |
| Msa.1749.1.S1_at    | Hypothetical protein                                                   | -15.20 |
| Mtr.13595.1.S1_at   | Lecithine cholesterol acyltransferase                                  | -15.17 |
| Mtr.34717.1.S1_at   | Disease resistance response protein                                    | -15.15 |
| Mtr.38722.1.S1_at   | Hypothetical protein                                                   | -15.10 |
| Mtr.52116.1.S1_at   | Glyceraldehyde 3-phosphate dehydrogenase                               | -15.09 |
| Mtr.9257.1.S1_at    | Starch synthase I                                                      | -15.04 |
| Mtr.38471.1.S1_at   | Ring finger protein                                                    | -15.03 |
| Mtr.27471.1.S1_s_at | Hypothetical protein                                                   | -15.02 |
| Mtr.19806.1.S1_at   | Hypothetical protein                                                   | -15.01 |
| Mtr.42830.1.S1_at   | Hypothetical protein                                                   | -15.01 |
| Mtr.43077.1.S1_at   | Hypothetical protein                                                   | -15.00 |
| Mtr.27892.1.S1_at   | Hypothetical protein                                                   | -14.99 |
| Mtr.11888.1.S1_at   | Aldehyde dehydrogenase                                                 | -14.97 |
| Mtr.8418.1.S1_s_at  | Xylulose kinase                                                        | -14.95 |
| Mtr.44199.1.S1_at   | Hypothetical protein                                                   | -14.95 |
| Mtr.17318.1.S1_at   | Magnesium-protoporphyrin IX monomethyl ester aerobic oxidative cyclase | -14.90 |
| Mtr.6738.1.S1_at    | Receptor-like protein kinase                                           | -14.88 |
| Mtr.2103.1.S1_at    | Hypothetical protein                                                   | -14.87 |
| Mtr.51819.1.S1_at   | Streptomyces cyclase/dehydrase                                         | -14.87 |
| Mtr.43503.1.S1_at   | Hypothetical protein                                                   | -14.85 |
| Mtr.40981.1.S1_at   | Cellulose synthase                                                     | -14.83 |
| Mtr.51040.1.S1_s_at | Cytochrome b-245                                                       | -14.78 |
| Msa.1095.1.S1_at    | Hypothetical protein                                                   | -14.76 |
| Msa.2842.1.S1_at    | Hypothetical protein                                                   | -14.74 |
| Mtr.21762.1.S1_s_at | Hypothetical protein                                                   | -14.72 |
| Mtr.8572.1.S1_at    | Thaumatococcus-like protein                                            | -14.68 |
| Mtr.37731.1.S1_at   | PWWP domain protein                                                    | -14.66 |
| Mtr.43197.1.S1_at   | Hypothetical protein                                                   | -14.64 |

|                     |                                                         |        |
|---------------------|---------------------------------------------------------|--------|
| Mtr.10206.1.S1_at   | Pentatricopeptide (PPR) repeat-containing protein       | -14.63 |
| Mtr.8362.1.S1_at    | Hypothetical protein                                    | -14.62 |
| Mtr.43744.1.S1_at   | Hypothetical protein                                    | -14.62 |
| Mtr.32865.1.S1_at   | Hypothetical protein                                    | -14.59 |
| Mtr.43509.1.S1_at   | Cyclic-AMP-dependent transcription factor ATF-5         | -14.57 |
| Mtr.34610.1.S1_at   | Hypothetical protein                                    | -14.49 |
| Mtr.51216.1.S1_s_at | Homeodomain-like                                        | -14.49 |
| Mtr.12422.1.S1_at   | Ferredoxin-dependent glutamate synthase                 | -14.47 |
| Mtr.14435.1.S1_at   | Calcium-binding EF-hand protein                         | -14.47 |
| Msa.1642.1.S1_at    | Hypothetical protein                                    | -14.44 |
| Msa.1363.1.S1_at    | Hypothetical protein                                    | -14.39 |
| Mtr.13442.1.S1_at   | Hypothetical protein                                    | -14.39 |
| Msa.2278.1.S1_at    | Hypothetical protein                                    | -14.34 |
| Mtr.8591.1.S1_at    | Hypothetical protein                                    | -14.33 |
| Msa.2800.1.S1_at    | Hypothetical protein                                    | -14.30 |
| Msa.1743.1.S1_at    | Hypothetical protein                                    | -14.27 |
| Mtr.33666.1.S1_at   | Hypothetical protein                                    | -14.26 |
| Mtr.6070.1.S1_at    | Histidine kinase                                        | -14.26 |
| Mtr.10593.1.S1_at   | Allene oxide cyclase                                    | -14.25 |
| Mtr.10857.1.S1_at   | MOLYBDENUM COFACTOR BIOSYNTHESIS PROTEIN C              | -14.24 |
| Mtr.18705.1.S1_at   | Peptidase C1A                                           | -14.22 |
| Mtr.2960.1.S1_at    | Magnesium transporter                                   | -14.18 |
| Msa.2629.1.S1_at    | Hypothetical protein                                    | -14.16 |
| Mtr.40587.1.S1_at   | Glyoxalase                                              | -14.16 |
| Mtr.51216.1.S1_at   | Homeodomain-like                                        | -14.15 |
| Mtr.11387.1.S1_at   | Hypothetical protein                                    | -14.13 |
| Mtr.12414.1.S1_at   | Apospory-associated protein C                           | -14.10 |
| Mtr.42854.1.S1_at   | Thioredoxin m                                           | -14.07 |
| Msa.2953.1.S1_at    | Hypothetical protein                                    | -14.07 |
| Mtr.40697.1.S1_at   | Putativepod-specific dehydrogenase                      | -14.02 |
| Mtr.15310.1.S1_at   | Fatty acid desaturase                                   | -14.01 |
| Mtr.38798.1.S1_at   | Hypothetical protein                                    | -14.00 |
| Mtr.42587.1.S1_at   | Heat shock transcription factor                         | -13.99 |
| Mtr.32682.1.S1_at   | Leucyl aminopeptidase                                   | -13.96 |
| Mtr.21718.1.S1_at   | Leucine-rich repeat                                     | -13.94 |
| Mtr.24048.1.S1_at   | Hypothetical protein                                    | -13.93 |
| Mtr.13592.1.S1_at   | Photomorphogenesis repressor protein                    | -13.90 |
| Mtr.50001.1.S1_s_at | Glutamate synthase                                      | -13.89 |
| Mtr.41906.1.S1_at   | Expansin-related protein 1                              | -13.88 |
| Mtr.12842.1.S1_at   | Hypothetical protein                                    | -13.88 |
| Mtr.2675.1.S1_s_at  | Transporter-like protein                                | -13.88 |
| Msa.1760.1.S1_at    | Hypothetical protein                                    | -13.86 |
| Mtr.13567.1.S1_at   | Hypothetical protein                                    | -13.86 |
| Mtr.27621.1.S1_at   | Hypothetical protein                                    | -13.86 |
| Mtr.20201.1.S1_at   | Na <sup>+</sup> /H <sup>+</sup> antiporter-like protein | -13.79 |
| Mtr.5468.1.S1_at    | Hypothetical protein                                    | -13.76 |
| Mtr.48866.1.S1_at   | Hypothetical protein                                    | -13.74 |
| Mtr.27399.1.S1_at   | Small basic membrane integral protein                   | -13.74 |
| Mtr.41751.1.S1_at   | Hypothetical protein                                    | -13.71 |
| Mtr.8900.1.S1_at    | Hypothetical protein                                    | -13.71 |
| Mtr.7468.1.S1_at    | 10 kDa photosystem II polypeptide                       | -13.66 |
| Mtr.39011.1.S1_at   | Auxin-binding protein                                   | -13.64 |
| Mtr.22781.1.S1_at   | Photosystem I-N subunit                                 | -13.60 |
| Mtr.30778.1.S1_at   | Hypothetical protein                                    | -13.60 |



|                     |                                                     |        |
|---------------------|-----------------------------------------------------|--------|
| Mtr.8207.1.S1_at    | Hypothetical protein                                | -13.59 |
| Mtr.20763.1.S1_s_at | ATP sulfurylase                                     | -13.56 |
| Mtr.37808.1.S1_at   | Hypothetical protein                                | -13.56 |
| Msa.2939.1.S1_at    | Hypothetical protein                                | -13.55 |
| Mtr.2477.1.S1_at    | Hypothetical protein                                | -13.54 |
| Mtr.11734.1.S1_at   | Sulfate transporter                                 | -13.54 |
| Mtr.38432.1.S1_at   | Temperature stress-induced lipocalin                | -13.53 |
| Mtr.27648.1.S1_at   | Hypothetical protein                                | -13.51 |
| Mtr.34177.1.S1_at   | Hypothetical protein                                | -13.47 |
| Mtr.41840.1.S1_at   | Cation diffusion facilitator 10                     | -13.46 |
| Mtr.44755.1.S1_at   | LRR-like protein                                    | -13.46 |
| Mtr.36454.1.S1_at   | Hypothetical protein                                | -13.43 |
| Mtr.13959.1.S1_at   | SHOOT1 protein                                      | -13.42 |
| Mtr.13851.1.S1_at   | Hypothetical protein                                | -13.40 |
| Msa.1853.1.S1_at    | Hypothetical protein                                | -13.40 |
| Msa.3048.1.S1_at    | Hypothetical protein                                | -13.37 |
| Mtr.9402.1.S1_at    | Aldehyde dehydrogenase                              | -13.36 |
| Mtr.22897.1.S1_s_at | Polygalacturonase                                   | -13.31 |
| Mtr.41070.1.S1_at   | Hypothetical protein                                | -13.30 |
| Msa.1943.1.S1_at    | Hypothetical protein                                | -13.28 |
| Mtr.25313.1.S1_at   | Hypothetical protein                                | -13.27 |
| Mtr.34902.1.S1_s_at | Phosphoenolpyruvate carboxylase                     | -13.27 |
| Mtr.32681.1.S1_at   | Hypothetical protein                                | -13.25 |
| Msa.1101.1.S1_at    | Hypothetical protein                                | -13.23 |
| Mtr.50758.1.S1_at   | Rubredoxin-type Fe(Cys) <sub>4</sub> protein        | -13.22 |
| Mtr.14524.1.S1_at   | Glucose/ribitol dehydrogenase                       | -13.21 |
| Mtr.39530.1.S1_at   | Hypothetical protein                                | -13.19 |
| Mtr.43807.1.S1_at   | Hypothetical protein                                | -13.17 |
| Mtr.12949.1.S1_at   | MURF2 protein                                       | -13.17 |
| Mtr.34703.1.S1_at   | Hypothetical protein                                | -13.15 |
| Mtr.42595.1.S1_at   | Hypothetical protein                                | -13.15 |
| Mtr.15310.1.S1_s_at | Fatty acid desaturase                               | -13.13 |
| Mtr.6729.1.S1_at    | Hypothetical protein                                | -13.12 |
| Mtr.13134.1.S1_at   | ABC1-like protein                                   | -13.09 |
| Mtr.43522.1.S1_at   | Plastid-lipid associated protein PAP                | -13.06 |
| Mtr.15051.1.S1_s_at | Hypothetical protein                                | -13.01 |
| Mtr.7544.1.S1_at    | Isoflavonoid glucosyltransferase                    | -12.98 |
| Mtr.20473.1.S1_at   | Hypothetical protein                                | -12.98 |
| Mtr.2086.1.S1_at    | Hypothetical protein                                | -12.98 |
| Mtr.42735.1.S1_at   | Hypothetical protein                                | -12.95 |
| Mtr.12899.1.S1_s_at | Hypothetical protein                                | -12.95 |
| Mtr.39235.1.S1_at   | Hypothetical protein                                | -12.94 |
| Msa.1787.1.S1_at    | Hypothetical protein                                | -12.94 |
| Mtr.41132.1.S1_at   | Hypothetical protein                                | -12.90 |
| Mtr.13901.1.S1_at   | Hypothetical protein                                | -12.87 |
| Mtr.25013.1.S1_at   | 2'-hydroxy isoflavone/dihydroflavonol reductase     | -12.87 |
| Mtr.11921.1.S1_at   | Thylakoid lumen protein                             | -12.87 |
| Mtr.47369.1.S1_s_at | ABC transporter                                     | -12.86 |
| Mtr.38850.1.S1_at   | Hypothetical protein                                | -12.83 |
| Mtr.43215.1.S1_at   | Hypothetical protein                                | -12.80 |
| Mtr.35794.1.S1_at   | Myo-inositol 1-phosphate synthase                   | -12.77 |
| Mtr.45379.1.S1_at   | Hypothetical protein                                | -12.76 |
| Mtr.40162.1.S1_at   | Reversibly glycosylated protein                     | -12.67 |
| Mtr.42070.1.S1_at   | Geminivirus replication protein-interacting protein | -12.66 |

|                     |                                                      |        |
|---------------------|------------------------------------------------------|--------|
| Mtr.32657.1.S1_s_at | Beta-amylase                                         | -12.60 |
| Mtr.7993.1.S1_s_at  | Glyceraldehyde-3-phosphate dehydrogenase             | -12.60 |
| Mtr.33484.1.S1_s_at | Hypothetical protein                                 | -12.58 |
| Mtr.29551.1.S1_at   | Hypothetical protein                                 | -12.53 |
| Mtr.34799.1.S1_at   | Hypothetical protein                                 | -12.53 |
| Mtr.23672.1.S1_at   | 51 kDa seed maturation protein                       | -12.53 |
| Mtr.11548.1.S1_at   | Starch synthase isoform SS III                       | -12.52 |
| Mtr.27875.1.S1_at   | ABC1                                                 | -12.48 |
| Mtr.45376.1.S1_at   | Nitrite transporter                                  | -12.47 |
| Mtr.32317.1.S1_s_at | Phototropin                                          | -12.45 |
| Mtr.33044.1.S1_s_at | Hypothetical protein                                 | -12.44 |
| Mtr.39964.1.S1_s_at | Hypothetical protein                                 | -12.41 |
| Msa.1191.1.S1_at    | Hypothetical protein                                 | -12.36 |
| Mtr.42897.1.S1_at   | Ycf23 protein                                        | -12.34 |
| Mtr.51053.1.S1_at   | Hypothetical protein                                 | -12.33 |
| Mtr.27132.1.S1_at   | Histidine-containing phosphotransfer protein         | -12.31 |
| Mtr.9728.1.S1_at    | Hypothetical protein                                 | -12.29 |
| Mtr.12300.1.S1_at   | Aminotransferase 2                                   | -12.29 |
| Mtr.39715.1.S1_at   | Isopiperitenone reductase                            | -12.28 |
| Mtr.44703.1.S1_at   | Hypothetical protein                                 | -12.27 |
| Mtr.42112.1.S1_at   | Hypothetical protein                                 | -12.25 |
| Mtr.36999.1.S1_at   | Photomorphogenesis repressor protein                 | -12.22 |
| Mtr.11736.1.S1_at   | Aquaporin NIP-type                                   | -12.21 |
| Mtr.6362.1.S1_at    | Aminopeptidase 2                                     | -12.21 |
| Mtr.44317.1.S1_at   | ApaG protein                                         | -12.19 |
| Mtr.47226.1.S1_at   | CBL-interacting protein kinase 1                     | -12.19 |
| Mtr.12821.1.S1_s_at | Phosphoglucomutase                                   | -12.18 |
| Mtr.42019.1.S1_at   | ClpB heat shock protein                              | -12.15 |
| Mtr.18614.1.S1_at   | Hypothetical protein                                 | -12.14 |
| Msa.1348.1.S1_at    | Hypothetical protein                                 | -12.09 |
| Mtr.28079.1.S1_at   | Hypothetical protein                                 | -12.07 |
| Mtr.43282.1.S1_at   | 2,7,4'-trihydroxyisoflavanone 4'-O-methyltransferase | -12.07 |
| Mtr.38676.1.S1_at   | Methyltransferase                                    | -12.04 |
| Mtr.12421.1.S1_at   | Hypothetical protein                                 | -12.03 |
| Mtr.9582.1.S1_at    | Glycogen(starch) synthase isoform II                 | -12.02 |
| Mtr.15109.1.S1_s_at | Hypothetical protein                                 | -12.02 |
| Mtr.21518.1.S1_at   | Cytochrome P450                                      | -12.00 |
| Mtr.15459.1.S1_at   | Major intrinsic protein                              | -12.00 |
| Mtr.5783.1.S1_at    | Flavin containing monooxygenase 3                    | -11.99 |
| Mtr.29826.1.S1_at   | Hypothetical protein                                 | -11.99 |
| Mtr.41162.1.S1_at   | Hypothetical protein                                 | -11.98 |
| Mtr.33004.1.S1_at   | Hypothetical protein                                 | -11.94 |
| Mtr.2703.1.S1_at    | Hypothetical protein                                 | -11.91 |
| Mtr.8575.1.S1_at    | Glucosyltransferase-13                               | -11.91 |
| Mtr.11791.1.S1_at   | Hypothetical protein                                 | -11.89 |
| Msa.2771.1.S1_at    | Hypothetical protein                                 | -11.89 |
| Mtr.44986.1.S1_at   | Acytransferase                                       | -11.86 |
| Mtr.10952.1.S1_at   | Sulfate adenyllyltransferase                         | -11.86 |
| Mtr.33891.1.S1_at   | Hypothetical protein                                 | -11.85 |
| Mtr.38356.1.S1_s_at | Hypothetical protein                                 | -11.84 |
| Mtr.5039.1.S1_at    | Receptor protein                                     | -11.80 |
| Mtr.8715.1.S1_at    | UDP-glucose glucosyltransferase                      | -11.79 |
| Mtr.50874.1.S1_at   | Hypothetical protein                                 | -11.78 |
| Mtr.34694.1.S1_at   | Hypothetical protein                                 | -11.77 |

|                     |                                             |        |
|---------------------|---------------------------------------------|--------|
| Mtr.13898.1.S1_at   | GPI-anchored protein                        | -11.77 |
| Mtr.43527.1.S1_at   | Hypothetical protein                        | -11.77 |
| Mtr.34745.1.S1_at   | Thylakoid lumenal 17.9 kDa protein          | -11.76 |
| Mtr.11073.1.S1_at   | Short-chain dehydrogenase Tic32             | -11.74 |
| Mtr.18086.1.S1_at   | RNA-directed DNA polymerase                 | -11.74 |
| Mtr.21518.1.S1_s_at | Cytochrome P450                             | -11.73 |
| Mtr.15420.1.S1_at   | ABC transporter                             | -11.73 |
| Mtr.44535.1.S1_at   | ClpB heat shock protein                     | -11.73 |
| Mtr.31456.1.S1_at   | FRO1 and FRO2-like protein                  | -11.72 |
| Mtr.33495.1.S1_at   | Hypothetical protein                        | -11.71 |
| Mtr.44539.1.S1_at   | Ent-kaurenoic acid oxidase                  | -11.69 |
| Mtr.1231.1.S1_s_at  | Omega-6 fatty acid desaturase               | -11.68 |
| Sme.4919.1.S1_at    | Hypothetical protein                        | -11.67 |
| Mtr.47857.1.S1_at   | Beta-amylase                                | -11.64 |
| Mtr.44674.1.S1_at   | Phytochrome A supressor spa1                | -11.64 |
| Msa.3133.1.S1_at    | Hypothetical protein                        | -11.63 |
| Mtr.51074.1.S1_at   | Inorganic pyrophosphatase                   | -11.62 |
| Mtr.8670.1.S1_at    | Hypothetical protein                        | -11.62 |
| Mtr.13080.1.S1_at   | Hypothetical protein                        | -11.59 |
| Mtr.33700.1.S1_at   | CAX                                         | -11.54 |
| Mtr.41816.1.S1_at   | Hypothetical protein                        | -11.49 |
| Mtr.41407.1.S1_at   | Hypothetical protein                        | -11.49 |
| Mtr.24085.1.S1_at   | Hypothetical protein                        | -11.49 |
| Mtr.35444.1.S1_at   | Oxygen evolving complex protein             | -11.47 |
| Mtr.5648.1.S1_s_at  | Enhanced disease susceptibility 5           | -11.47 |
| Mtr.43833.1.S1_at   | Hypothetical protein                        | -11.45 |
| Mtr.28597.1.S1_at   | Hypothetical protein                        | -11.45 |
| Mtr.38250.1.S1_at   | Hypothetical protein                        | -11.44 |
| Mtr.8954.1.S1_at    | Hypothetical protein                        | -11.44 |
| Msa.1239.1.S1_at    | Hypothetical protein                        | -11.43 |
| Mtr.26941.1.S1_at   | Hypothetical protein                        | -11.43 |
| Mtr.12401.1.S1_s_at | Myb-related transcription factor MYB59      | -11.43 |
| Mtr.10301.1.S1_s_at | 18S ribosomal RNA                           | -11.41 |
| Msa.2667.1.S1_at    | Hypothetical protein                        | -11.41 |
| Mtr.51445.1.S1_x_at | Hypothetical protein                        | -11.38 |
| Mtr.24591.1.S1_at   | Hypothetical protein                        | -11.37 |
| Mtr.8517.1.S1_at    | Mannitol dehydrogenase                      | -11.31 |
| Mtr.13436.1.S1_at   | Nodule-enhanced protein phosphatase type 2C | -11.28 |
| Mtr.17305.1.S1_at   | Peptidase S4                                | -11.28 |
| Mtr.40393.1.S1_s_at | MYB transcription factor                    | -11.28 |
| Mtr.19422.1.S1_at   | ParB-like nuclease                          | -11.28 |
| Mtr.40232.1.S1_at   | Geranylgeranyl hydrogenase                  | -11.27 |
| Mtr.45404.1.S1_at   | Glycine/D-amino acid oxidases               | -11.26 |
| Msa.2585.1.S1_at    | Hypothetical protein                        | -11.24 |
| Mtr.44131.1.S1_at   | Hypothetical protein                        | -11.24 |
| Msa.1080.1.S1_at    | Hypothetical protein                        | -11.21 |
| Mtr.41859.1.S1_at   | FRO1 and FRO2-like protein                  | -11.20 |
| Mtr.40391.1.S1_at   | Hypothetical protein                        | -11.19 |
| Mtr.2712.1.S1_at    | Cyclin delta-3                              | -11.14 |
| Mtr.46740.1.S1_at   | Hypothetical protein                        | -11.12 |
| Mtr.1814.1.S1_at    | RING-H2 zinc finger protein                 | -11.11 |
| Mtr.32128.1.S1_at   | Hypothetical protein                        | -11.10 |
| Mtr.10889.1.S1_at   | Hypothetical protein                        | -11.09 |
| Mtr.28238.1.S1_at   | Subtilisin-like protease                    | -11.07 |

|                     |                                            |        |
|---------------------|--------------------------------------------|--------|
| Mtr.43899.1.S1_at   | Hydrolase                                  | -11.06 |
| Mtr.27410.1.S1_at   | Hypothetical protein                       | -11.05 |
| Mtr.18604.1.S1_at   | Hypothetical protein                       | -11.02 |
| Mtr.42306.1.S1_at   | Hypothetical protein                       | -11.00 |
| Mtr.17068.1.S1_at   | WD-40 repeat protein                       | -10.99 |
| Mtr.26042.1.S1_at   | Hypothetical protein                       | -10.99 |
| Mtr.7850.1.S1_s_at  | Thaumatococcus-like protein                | -10.98 |
| Msa.1854.1.S1_at    | Hypothetical protein                       | -10.97 |
| Mtr.41565.1.S1_s_at | Hypothetical protein                       | -10.96 |
| Mtr.39017.1.S1_at   | Hypothetical protein                       | -10.96 |
| Mtr.43350.1.S1_at   | Hypothetical protein                       | -10.95 |
| Mtr.39302.1.S1_at   | Translation initiation factor IF-2         | -10.95 |
| Mtr.37780.1.S1_at   | Alpha-glucan phosphorylase                 | -10.92 |
| Mtr.9416.1.S1_at    | Protease sppA                              | -10.92 |
| Mtr.13420.1.S1_at   | Selenium-binding protein                   | -10.90 |
| Msa.981.1.S1_at     | Hypothetical protein                       | -10.89 |
| Mtr.8917.1.S1_at    | Dehydrogenase                              | -10.89 |
| Mtr.47901.1.S1_x_at | Glyceraldehyde-3-phosphate dehydrogenase A | -10.87 |
| Mtr.13606.1.S1_at   | Hypothetical protein                       | -10.87 |
| Mtr.37855.1.S1_at   | MAP kinase (Ser/Thr kinase)                | -10.84 |
| Mtr.13975.1.S1_at   | Ycf23 protein                              | -10.83 |
| Mtr.43498.1.S1_at   | Hypothetical protein                       | -10.83 |
| Mtr.19562.1.S1_at   | Zn-finger, RING                            | -10.82 |
| Mtr.20515.1.S1_at   | Ferrochelatase                             | -10.81 |
| Mtr.17600.1.S1_at   | Protein kinase                             | -10.74 |
| Mtr.25983.1.S1_s_at | Pectinesterase                             | -10.74 |
| Mtr.46001.1.S1_at   | Hypothetical protein                       | -10.73 |
| Mtr.45397.1.S1_at   | Ankyrin repeat-like protein                | -10.73 |
| Mtr.6746.1.S1_s_at  | LEM3 (Ligand-effect modulator 3)           | -10.72 |
| Mtr.8402.1.S1_at    | Hypothetical protein                       | -10.72 |
| Mtr.18769.1.S1_at   | Homeobox                                   | -10.71 |
| Mtr.27870.1.S1_at   | Hypothetical protein                       | -10.71 |
| Msa.2712.1.S1_at    | Hypothetical protein                       | -10.69 |
| Mtr.20822.1.S1_at   | Hypothetical protein                       | -10.66 |
| Mtr.39251.1.S1_at   | Translation initiation factor IF-2         | -10.66 |
| Msa.935.1.S1_at     | Hypothetical protein                       | -10.66 |
| Mtr.35254.1.S1_at   | Short chain dehydrogenase/reductase        | -10.65 |
| Msa.2885.1.S1_at    | Hypothetical protein                       | -10.65 |
| Mtr.22693.1.S1_s_at | Hypothetical protein                       | -10.64 |
| Mtr.39104.1.S1_at   | Xylulose kinase like protein               | -10.63 |
| Mtr.39425.1.S1_s_at | ATP-sulfurylase                            | -10.61 |
| Mtr.45511.1.S1_at   | Histidine kinase                           | -10.59 |
| Mtr.9262.1.S1_at    | Hsc70 protein                              | -10.59 |
| Mtr.41614.1.S1_at   | Hypothetical protein                       | -10.59 |
| Mtr.47283.1.S1_at   | Hypothetical protein                       | -10.58 |
| Mtr.7832.1.S1_at    | Hypothetical protein                       | -10.58 |
| Mtr.8773.1.S1_s_at  | Poly(A) polymerase                         | -10.57 |
| Mtr.11556.1.S1_at   | Carbohydrate oxidase                       | -10.57 |
| Mtr.5135.1.S1_at    | Protein kinase family                      | -10.55 |
| Mtr.38712.1.S1_at   | Hypothetical protein                       | -10.54 |
| Mtr.39370.1.S1_at   | Hypothetical protein                       | -10.54 |
| Mtr.39821.1.S1_at   | Membrane transporter                       | -10.53 |
| Msa.1471.1.S1_at    | Hypothetical protein                       | -10.52 |
| Mtr.51258.1.S1_at   | Annexin                                    | -10.51 |

|                     |                                             |        |
|---------------------|---------------------------------------------|--------|
| Mtr.11001.1.S1_at   | Hypothetical protein                        | -10.50 |
| Mtr.11129.1.S1_at   | Hypothetical protein                        | -10.47 |
| Mtr.41918.1.S1_at   | Hypothetical protein                        | -10.47 |
| Mtr.42982.1.S1_at   | Carbonic anhydrase                          | -10.46 |
| Mtr.22814.1.S1_at   | Hypothetical protein                        | -10.46 |
| Mtr.30958.1.S1_at   | Hypothetical protein                        | -10.46 |
| Mtr.12236.1.S1_at   | Bundle sheath defective protein 2           | -10.45 |
| Mtr.34178.1.S1_s_at | Hypothetical protein                        | -10.44 |
| Mtr.33532.1.S1_at   | Kinesin heavy chain                         | -10.44 |
| Mtr.47901.1.S1_at   | Glyceraldehyde-3-phosphate dehydrogenase A  | -10.44 |
| Mtr.33889.1.S1_at   | CER1 protein                                | -10.41 |
| Mtr.15109.1.S1_at   | Hypothetical protein                        | -10.40 |
| Mtr.41157.1.S1_at   | RAC-like GTP binding protein RAC13          | -10.39 |
| Msa.1850.1.S1_at    | Hypothetical protein                        | -10.39 |
| Mtr.42315.1.S1_at   | Starch synthase isoform                     | -10.37 |
| Mtr.28644.1.S1_at   | Cytokinin receptor                          | -10.36 |
| Mtr.45729.1.S1_s_at | ATP sulfurylase-related protein             | -10.36 |
| Mtr.32983.1.S1_at   | Protein kinase                              | -10.35 |
| Mtr.11495.1.S1_at   | Steroid 5alpha-reductase-like protein       | -10.34 |
| Msa.1143.1.S1_s_at  | Hypothetical protein                        | -10.33 |
| Mtr.40710.1.S1_at   | Malate dehydrogenase                        | -10.32 |
| Mtr.11816.1.S1_at   | Hypothetical protein                        | -10.31 |
| Mtr.19992.1.S1_at   | Phytochrome kinase substrate 1              | -10.30 |
| Mtr.47158.1.S1_at   | Hypothetical protein                        | -10.27 |
| Mtr.38724.1.S1_at   | Hypothetical protein                        | -10.26 |
| Mtr.42033.1.S1_at   | Hypothetical protein                        | -10.25 |
| Mtr.45039.1.S1_at   | Peptidylprolyl isomerase                    | -10.25 |
| Mtr.9046.1.S1_at    | GAST1                                       | -10.23 |
| Mtr.38550.1.S1_at   | Subtilisin-like proteinase                  | -10.23 |
| Mtr.6551.1.S1_at    | Hypothetical protein                        | -10.21 |
| Mtr.16188.1.S1_at   | Hypothetical protein                        | -10.19 |
| Mtr.40683.1.S1_at   | Photosystem II protein W-like protein       | -10.19 |
| Mtr.13054.1.S1_at   | Wall-associated kinase                      | -10.17 |
| Mtr.11332.1.S1_at   | Hypothetical protein                        | -10.16 |
| Mtr.41622.1.S1_at   | Hypothetical protein                        | -10.16 |
| Mtr.928.1.S1_at     | Hypothetical protein                        | -10.15 |
| Mtr.22603.1.S1_at   | Glyceraldehyde-3-phosphate dehydrogenase A  | -10.14 |
| Mtr.37807.1.S1_at   | Transporter                                 | -10.12 |
| Mtr.42265.1.S1_at   | Transmembrane protein kinase                | -10.12 |
| Mtr.13393.1.S1_at   | Hypothetical protein                        | -10.12 |
| Mtr.11744.1.S1_at   | Hypothetical protein                        | -10.12 |
| Mtr.37345.1.S1_at   | Subtilisin-like protease                    | -10.11 |
| Mtr.9192.1.S1_at    | Disease resistance protein                  | -10.11 |
| Mtr.5655.1.S1_s_at  | ADP-glucose pyrophosphorylase large subunit | -10.10 |
| Mtr.39352.1.S1_at   | Hypothetical protein                        | -10.10 |
| Mtr.13330.1.S1_at   | Hypothetical protein                        | -10.09 |
| Msa.1307.1.S1_at    | Hypothetical protein                        | -10.07 |
| Mtr.20579.1.S1_at   | Hypothetical protein                        | -10.06 |
| Mtr.43627.1.S1_at   | Hypothetical protein                        | -10.05 |
| Mtr.34708.1.S1_at   | Sulfolipid synthase                         | -10.04 |
| Mtr.17233.1.S1_at   | Hypothetical protein                        | -10.04 |
| Mtr.12382.1.S1_at   | Hypothetical protein                        | -10.04 |
| Mtr.37550.1.S1_at   | 4-alpha-glucanotransferase                  | -10.04 |
| Mtr.8588.1.S1_at    | Hypothetical protein                        | -10.04 |

|                     |                                                     |        |
|---------------------|-----------------------------------------------------|--------|
| Mtr.48945.1.S1_s_at | Ferrochelatase                                      | -10.02 |
| Mtr.12448.1.S1_at   | IAA-Ala hydrolase (IAR3)                            | -10.01 |
| Mtr.18105.1.S1_at   | Phosphoglycerate kinase                             | -10.00 |
| Mtr.48351.1.S1_at   | Proteinase inhibitor 20                             | -9.99  |
| Msa.3102.1.S1_at    | Hypothetical protein                                | -9.98  |
| Mtr.44611.1.S1_at   | Hypothetical protein                                | -9.98  |
| Mtr.38403.1.S1_at   | Thylakoid lumenal 25.6 kDa protein                  | -9.95  |
| Mtr.7197.1.S1_at    | Inositol 1,3,4-trisphosphate 5/6-kinase             | -9.95  |
| Mtr.50016.1.S1_at   | Hypothetical protein                                | -9.94  |
| Mtr.634.1.S1_at     | Hypothetical protein                                | -9.91  |
| Mtr.51188.1.S1_at   | Glycine hydroxymethyltransferase                    | -9.87  |
| Mtr.13458.1.S1_at   | 3(2),5-BISPHOSPHATE NUCLEOTIDASE                    | -9.87  |
| Mtr.6728.1.S1_at    | Cytochrome P-450                                    | -9.86  |
| Msa.3143.1.S1_at    | Hypothetical protein                                | -9.86  |
| Mtr.43359.1.S1_at   | Phytochelatin synthetase                            | -9.81  |
| Mtr.44198.1.S1_at   | Hypothetical protein                                | -9.81  |
| Mtr.40204.1.S1_at   | Aldehyde dehydrogenase 1                            | -9.80  |
| Mtr.9437.1.S1_at    | Hypothetical protein                                | -9.80  |
| Mtr.42210.1.S1_s_at | Two-component response regulator-like APRR3         | -9.79  |
| Mtr.42509.1.S1_at   | Hypothetical protein                                | -9.79  |
| Mtr.41265.1.S1_at   | Glutathione S-transferase GST 10                    | -9.77  |
| Mtr.11668.1.S1_at   | Hypothetical protein                                | -9.76  |
| Mtr.14453.1.S1_at   | Rhodanese-like protein                              | -9.75  |
| Mtr.40872.1.S1_at   | Hypothetical protein                                | -9.74  |
| Mtr.43762.1.S1_at   | Hypothetical protein                                | -9.74  |
| Mtr.19208.1.S1_at   | Zn-finger, RING                                     | -9.73  |
| Mtr.47369.1.S1_at   | ABC transporter                                     | -9.73  |
| Mtr.51423.1.S1_at   | Sugar transporter                                   | -9.72  |
| Mtr.45551.1.S1_at   | Hypothetical protein                                | -9.70  |
| Mtr.16202.1.S1_at   | Esterase/lipase/thioesterase                        | -9.69  |
| Mtr.28675.1.S1_at   | Polygalacturonase                                   | -9.69  |
| Mtr.9742.1.S1_at    | Geminivirus replication protein-interacting protein | -9.69  |
| Mtr.6694.1.S1_at    | Na/Ca,K-exchanger-like protein                      | -9.68  |
| Mtr.40926.1.S1_at   | Thioredoxin-like protein                            | -9.65  |
| Mtr.42672.1.S1_at   | Hypothetical protein                                | -9.65  |
| Mtr.44653.1.S1_at   | Myb-related transcription activator                 | -9.65  |
| Mtr.9686.1.S1_at    | Beta-1,3-glucanase                                  | -9.64  |
| Mtr.36140.1.S1_at   | Phosphoenolpyruvate carboxylase                     | -9.63  |
| Mtr.12493.1.S1_at   | Hypothetical protein                                | -9.63  |
| Mtr.12821.1.S1_at   | Phosphoglucomutase                                  | -9.62  |
| Msa.960.1.S1_at     | Hypothetical protein                                | -9.61  |
| Mtr.50122.1.S1_at   | Hypothetical protein                                | -9.60  |
| Mtr.25494.1.S1_at   | Galactinol synthase                                 | -9.59  |
| Mtr.33572.1.S1_at   | Glucose transporter                                 | -9.56  |
| Mtr.25331.1.S1_at   | Glutamate receptor                                  | -9.56  |
| Mtr.43335.1.S1_at   | 4-coumarate:coenzyme A ligase                       | -9.55  |
| Mtr.32947.1.S1_at   | Hypothetical protein                                | -9.55  |
| Mtr.4716.1.S1_at    | Nitrite transport protein                           | -9.52  |
| Mtr.12259.1.S1_at   | Rubisco activase                                    | -9.51  |
| Mtr.13021.1.S1_at   | Lustrin A-like protein                              | -9.48  |
| Mtr.13843.1.S1_at   | Hypothetical protein                                | -9.46  |
| Mtr.39782.1.S1_at   | Ppib protein                                        | -9.44  |
| Mtr.38392.1.S1_at   | ClpB heat shock protein                             | -9.44  |
| Mtr.38458.1.S1_at   | FKBP-type peptidyl-prolyl cis-trans isomerase 2     | -9.41  |

|                     |                                                                   |       |
|---------------------|-------------------------------------------------------------------|-------|
| Mtr.12582.1.S1_at   | Hypothetical protein                                              | -9.41 |
| Mtr.52214.1.S1_at   | Hypothetical protein                                              | -9.41 |
| Mtr.46292.1.S1_at   | Malate dehydrogenase                                              | -9.40 |
| Mtr.40392.1.S1_s_at | Circadian clock associated1                                       | -9.40 |
| Mtr.25945.1.S1_at   | Myb-related                                                       | -9.39 |
| Msa.1495.1.S1_at    | Hypothetical protein                                              | -9.36 |
| Mtr.38080.1.S1_at   | Hypothetical protein                                              | -9.35 |
| Mtr.525.1.S1_at     | Hypothetical protein                                              | -9.35 |
| Mtr.33476.1.S1_at   | Receptor protein kinase                                           | -9.35 |
| Msa.1805.1.S1_at    | Hypothetical protein                                              | -9.34 |
| Mtr.33861.1.S1_at   | Hypothetical protein                                              | -9.33 |
| Mtr.32529.1.S1_at   | Transcription factor                                              | -9.33 |
| Mtr.8683.1.S1_at    | Phosphoenolpyruvate carboxylase                                   | -9.32 |
| Mtr.49583.1.S1_at   | Glycoside hydrolase                                               | -9.31 |
| Msa.2871.1.S1_at    | Hypothetical protein                                              | -9.31 |
| Mtr.14312.1.S1_at   | Hypothetical protein                                              | -9.30 |
| Mtr.7160.1.S1_at    | ABC transporter                                                   | -9.28 |
| Mtr.15414.1.S1_at   | Hypothetical protein                                              | -9.28 |
| Mtr.12770.1.S1_at   | Phosphoglucomutase                                                | -9.27 |
| Mtr.36889.1.S1_s_at | NIP3                                                              | -9.27 |
| Mtr.8557.1.S1_s_at  | MtN5 protein                                                      | -9.25 |
| Mtr.30196.1.S1_at   | S-adenosyl-L-methionine:salicylic acid carboxyl methyltransferase | -9.25 |
| Mtr.37643.1.S1_at   | NADP-dependent oxidoreductase P2                                  | -9.23 |
| Mtr.19310.1.S1_s_at | N-acetyl-gamma-glutamyl-phosphate reductase                       | -9.23 |
| Mtr.27359.1.S1_at   | Isoleucyl-tRNA synthetase                                         | -9.23 |
| Mtr.20397.1.S1_at   | Amidase, hydantoinase/carbamoylase                                | -9.22 |
| Mtr.45068.1.S1_at   | Hypothetical protein                                              | -9.22 |
| Mtr.41202.1.S1_at   | Hypothetical protein                                              | -9.21 |
| Mtr.45179.1.S1_at   | Malate dehydrogenase                                              | -9.21 |
| Mtr.43181.1.S1_at   | Thiamine biosynthesis protein                                     | -9.20 |
| Mtr.6132.1.S1_s_at  | Subtilisin-like protein protease                                  | -9.17 |
| Mtr.15811.1.S1_at   | Hypothetical protein                                              | -9.16 |
| Mtr.6059.1.S1_at    | basic Helix Loop Helix protein                                    | -9.16 |
| Mtr.15585.1.S1_at   | Copper/Zinc superoxide dismutase                                  | -9.14 |
| Mtr.35945.1.S1_at   | UDP-glycose:flavonoid glycosyltransferase                         | -9.13 |
| Mtr.32638.1.S1_s_at | Hypothetical protein                                              | -9.13 |
| Mtr.20946.1.S1_at   | Serine/threonine protein kinase                                   | -9.12 |
| Mtr.48272.1.S1_at   | Glycine dehydrogenase                                             | -9.12 |
| Mtr.37552.1.S1_at   | RNA- or ssDNA-binding protein                                     | -9.11 |
| Mtr.33674.1.S1_s_at | Glutamyl-tRNA reductase 1                                         | -9.10 |
| Mtr.33011.1.S1_at   | Copper transport protein                                          | -9.09 |
| Mtr.10088.1.S1_at   | Hypothetical protein                                              | -9.09 |
| Mtr.32723.1.S1_at   | Formiminotransferase-cyclodeaminase                               | -9.08 |
| Msa.3192.1.S1_at    | Hypothetical protein                                              | -9.07 |
| Mtr.49256.1.S1_at   | Hypothetical protein                                              | -9.07 |
| Msa.3102.1.S1_x_at  | Hypothetical protein                                              | -9.06 |
| Mtr.6869.1.S1_s_at  | Glutamate receptor 3.6                                            | -9.06 |
| Mtr.22897.1.S1_at   | Polygalacturonase                                                 | -9.06 |
| Mtr.34700.1.S1_at   | Tryptophan synthase beta chain 1                                  | -9.05 |
| Mtr.47706.1.S1_at   | Myb family transcription factor                                   | -9.04 |
| Msa.1665.1.S1_at    | Hypothetical protein                                              | -9.04 |
| Mtr.37839.1.S1_at   | [4Fe-4S] cluster assembly factor                                  | -9.03 |
| Mtr.42261.1.S1_at   | Rubisco activase                                                  | -9.02 |
| Mtr.5714.1.S1_at    | Hypothetical protein                                              | -9.00 |

|                     |                                              |       |
|---------------------|----------------------------------------------|-------|
| Mtr.26801.1.S1_a_at | Hypothetical protein                         | -9.00 |
| Mtr.49274.1.S1_at   | Cupredoxin                                   | -8.99 |
| Msa.989.1.S1_s_at   | Hypothetical protein                         | -8.98 |
| Mtr.3071.1.S1_at    | Starch synthase                              | -8.98 |
| Mtr.40160.1.S1_s_at | Pyrroline-5-carboxylate reductase            | -8.97 |
| Mtr.27055.1.S1_s_at | Plastid RNA polymerase                       | -8.97 |
| Mtr.39530.1.S1_s_at | Hypothetical protein                         | -8.96 |
| Mtr.46957.1.S1_at   | Hypothetical protein                         | -8.94 |
| Mtr.41940.1.S1_at   | Hypothetical protein                         | -8.94 |
| Msa.985.1.S1_at     | Hypothetical protein                         | -8.93 |
| Mtr.41447.1.S1_at   | Hypothetical protein                         | -8.93 |
| Mtr.8133.1.S1_at    | Hypothetical protein                         | -8.92 |
| Mtr.40620.1.S1_at   | Hypothetical protein                         | -8.92 |
| Mtr.929.1.S1_s_at   | Hypothetical protein                         | -8.91 |
| Mtr.46511.1.S1_x_at | Alpha/beta-amyrin synthase                   | -8.90 |
| Mtr.40963.1.S1_at   | En/Spm-like transposon protein               | -8.90 |
| Msa.1377.1.S1_at    | Hypothetical protein                         | -8.90 |
| Mtr.1268.1.S1_at    | Hypothetical protein                         | -8.89 |
| Mtr.20646.1.S1_s_at | Glucose/ribitol dehydrogenase                | -8.88 |
| Mtr.12358.1.S1_at   | Seed maturation protein LEA 4                | -8.87 |
| Mtr.37298.1.S1_at   | Cytochrome P450                              | -8.84 |
| Msa.2727.1.S1_at    | Hypothetical protein                         | -8.83 |
| Mtr.25367.1.S1_at   | 12-oxophytodienoic acid 10, 11-reductase     | -8.80 |
| Mtr.2077.1.S1_at    | Hypothetical protein                         | -8.80 |
| Mtr.3805.1.S1_at    | Laccase                                      | -8.78 |
| Mtr.41958.1.S1_at   | Hypothetical protein                         | -8.78 |
| Msa.2888.1.S1_at    | Hypothetical protein                         | -8.77 |
| Mtr.28817.1.S1_at   | Hypothetical protein                         | -8.77 |
| Msa.2550.1.S1_at    | Hypothetical protein                         | -8.76 |
| Msa.2653.1.S1_at    | Hypothetical protein                         | -8.75 |
| Mtr.10039.1.S1_at   | Hypothetical protein                         | -8.75 |
| Mtr.9876.1.S1_at    | Nuclear transcription factor Y               | -8.74 |
| Mtr.41868.1.S1_at   | Tryptophan synthase beta chain 1             | -8.74 |
| Mtr.48721.1.S1_at   | Cytochrome c                                 | -8.73 |
| Msa.1910.1.S1_at    | Hypothetical protein                         | -8.72 |
| Mtr.28166.1.S1_s_at | Dihydrolipoamide Dehydrogenase               | -8.72 |
| Mtr.35488.1.S1_at   | Hypothetical protein                         | -8.72 |
| Mtr.12308.1.S1_at   | Photosystem I reaction center subunit psaK   | -8.69 |
| Mtr.25657.1.S1_at   | Cell-wall P4 protein                         | -8.69 |
| Mtr.9418.1.S1_s_at  | Pathogenesis-related protein                 | -8.69 |
| Mtr.35142.1.S1_at   | Hypothetical protein                         | -8.66 |
| Mtr.41702.1.S1_at   | Hypothetical protein                         | -8.65 |
| Mtr.15561.1.S1_at   | GCN5-related N-acetyltransferase             | -8.64 |
| Mtr.40734.1.S1_at   | Glucosyltransferase-14                       | -8.63 |
| Msa.1297.1.S1_at    | Hypothetical protein                         | -8.63 |
| Mtr.19267.1.S1_at   | Photosystem I protein PsdD                   | -8.61 |
| Mtr.47977.1.S1_at   | Nodule-specific protein                      | -8.61 |
| Mtr.6717.1.S1_at    | Acyl-activating enzyme 14                    | -8.60 |
| Mtr.6746.1.S1_at    | LEM3 (Ligand-effect modulator 3)             | -8.59 |
| Mtr.52053.1.S1_at   | Ribosomal protein L35                        | -8.57 |
| Mtr.6869.1.S1_at    | Glutamate receptor 3.6                       | -8.56 |
| Mtr.48911.1.S1_at   | Short-chain dehydrogenase/reductase          | -8.56 |
| Mtr.27223.1.S1_s_at | Hypothetical protein                         | -8.54 |
| Mtr.52150.1.S1_at   | UTP--glucose-1-phosphate uridylyltransferase | -8.53 |



|                     |                                                     |       |
|---------------------|-----------------------------------------------------|-------|
| Mtr.1885.1.S1_at    | Symbiotic ammonium transporter                      | -8.53 |
| Mtr.24793.1.S1_at   | Blight resistance protein RGA1                      | -8.53 |
| Mtr.12273.1.S1_s_at | Ribulose 1,5-bisphosphate carboxylase small subunit | -8.52 |
| Mtr.44543.1.S1_at   | Transmembrane transport protein                     | -8.52 |
| Mtr.41590.1.S1_at   | Hypothetical protein                                | -8.51 |
| Mtr.9534.1.S1_at    | Hypothetical protein                                | -8.51 |
| Mtr.37898.1.S1_at   | Short-chain dehydrogenase Tic32                     | -8.49 |
| Mtr.43727.1.S1_at   | Squalene monooxygenase 1                            | -8.49 |
| Mtr.10393.1.S1_at   | Thiamin biosynthetic enzyme                         | -8.47 |
| Mtr.11416.1.S1_at   | HMG-box transcription factor 3                      | -8.46 |
| Mtr.6733.1.S1_at    | Rhomboid family protein                             | -8.46 |
| Mtr.11529.1.S1_at   | SOUL heme-binding protein                           | -8.46 |
| Mtr.41414.1.S1_at   | Hypothetical protein                                | -8.45 |
| Mtr.47452.1.S1_at   | Isoflavone 2'-hydroxylase                           | -8.44 |
| Mtr.6155.1.S1_at    | Protein kinase                                      | -8.44 |
| Mtr.3858.1.S1_at    | Leucoanthocyanidin dioxygenase                      | -8.42 |
| Msa.1069.1.S1_at    | Hypothetical protein                                | -8.42 |
| Mtr.40761.1.S1_at   | 50S ribosomal protein L11                           | -8.42 |
| Msa.1655.1.S1_at    | Hypothetical protein                                | -8.41 |
| Mtr.40799.1.S1_at   | Subtilisin-like protease                            | -8.41 |
| Mtr.32760.1.S1_at   | Hypothetical protein                                | -8.41 |
| Msa.3120.1.S1_at    | Hypothetical protein                                | -8.40 |
| Mtr.34741.1.S1_at   | 3(2),5-BISPHOSPHATE NUCLEOTIDASE                    | -8.39 |
| Mtr.40514.1.S1_at   | Ultraviolet-B-repressible protein                   | -8.38 |
| Mtr.42164.1.S1_at   | Hypothetical protein                                | -8.38 |
| Mtr.38984.1.S1_at   | Hypothetical protein                                | -8.36 |
| Mtr.39735.1.S1_at   | Hypothetical protein                                | -8.36 |
| Mtr.27111.1.S1_at   | GTPase engC protein 1                               | -8.35 |
| Mtr.42914.1.S1_x_at | Ribulose 1,5-bisphosphate carboxylase small subunit | -8.34 |
| Msa.2847.1.S1_at    | Hypothetical protein                                | -8.33 |
| Mtr.8772.1.S1_at    | Poly(A) polymerase                                  | -8.32 |
| Mtr.9162.1.S1_at    | Carboxypeptidase type III                           | -8.32 |
| Mtr.16226.1.S1_at   | Serine/threonine protein kinase                     | -8.30 |
| Msa.1349.1.S1_at    | Hypothetical protein                                | -8.30 |
| Mtr.33765.1.S1_s_at | Hypothetical protein                                | -8.30 |
| Mtr.20818.1.S1_at   | Xylulose kinase                                     | -8.30 |
| Mtr.40347.1.S1_at   | Omega-3 fatty acid desaturase                       | -8.29 |
| Mtr.33632.1.S1_s_at | Hypothetical protein                                | -8.29 |
| Mtr.43393.1.S1_at   | Nicotianamine synthase                              | -8.29 |
| Mtr.2111.1.S1_at    | Hypothetical protein                                | -8.28 |
| Mtr.33426.1.S1_at   | MRP-like ABC transporter                            | -8.27 |
| Mtr.27827.1.S1_at   | Hypothetical protein                                | -8.26 |
| Mtr.7520.1.S1_at    | Hypothetical protein                                | -8.26 |
| Mtr.12555.1.S1_at   | Alpha-glucan phosphorylase                          | -8.26 |
| Mtr.50904.1.S1_at   | Hypothetical protein                                | -8.25 |
| Mtr.37420.1.S1_at   | Glycine cleavage system H protein                   | -8.25 |
| Mtr.33529.1.S1_at   | Hypothetical protein                                | -8.24 |
| Mtr.37749.1.S1_at   | Hypothetical protein                                | -8.24 |
| Mtr.34738.1.S1_s_at | Copper/zinc superoxide dismutase                    | -8.24 |
| Msa.1844.1.S1_at    | Hypothetical protein                                | -8.22 |
| Mtr.40814.1.S1_at   | Chlorophyll synthetase                              | -8.21 |
| Mtr.10485.1.S1_at   | Glucose-6-phosphate isomerase                       | -8.19 |
| Mtr.12039.1.S1_at   | Peptide transporter 1                               | -8.16 |
| Mtr.24731.1.S1_at   | Hypothetical protein                                | -8.15 |

|                     |                                                    |       |
|---------------------|----------------------------------------------------|-------|
| Mtr.44491.1.S1_at   | Hypothetical protein                               | -8.14 |
| Msa.858.1.S1_at     | Hypothetical protein                               | -8.13 |
| Mtr.40715.1.S1_at   | Mercuric reductase                                 | -8.11 |
| Mtr.45935.1.S1_at   | Hypothetical protein                               | -8.10 |
| Mtr.45384.1.S1_at   | Hypothetical protein                               | -8.09 |
| Mtr.20229.1.S1_at   | UDP-glucose:anthocyanin 5-O-glucosyltransferase    | -8.08 |
| Mtr.4948.1.S1_at    | ABC transporter                                    | -8.08 |
| Mtr.39387.1.S1_at   | DCL protein                                        | -8.08 |
| Mtr.8410.1.S1_at    | Sulfate transporter                                | -8.07 |
| Mtr.49461.1.S1_at   | Hypothetical protein                               | -8.07 |
| Mtr.12374.1.S1_at   | Protochlorophyllide reductase                      | -8.07 |
| Mtr.40321.1.S1_at   | Hydroperoxide lyase                                | -8.07 |
| Mtr.29849.1.S1_at   | Hypothetical protein                               | -8.07 |
| Mtr.35625.1.S1_s_at | Hypothetical protein                               | -8.06 |
| Mtr.32661.1.S1_at   | Hypothetical protein                               | -8.05 |
| Msa.1161.1.S1_at    | Hypothetical protein                               | -8.05 |
| Mtr.38869.1.S1_at   | Hypothetical protein                               | -8.03 |
| Mtr.45313.1.S1_at   | Multidrug resistance-associated protein 2          | -8.03 |
| Mtr.44782.1.S1_at   | Hypothetical protein                               | -8.03 |
| Mtr.13059.1.S1_at   | Hypothetical protein                               | -8.02 |
| Mtr.17765.1.S1_at   | TGF-beta receptor                                  | -8.02 |
| Mtr.40978.1.S1_at   | Hypothetical protein                               | -8.01 |
| Msa.3118.1.S1_at    | Hypothetical protein                               | -8.00 |
| Mtr.43060.1.S1_at   | GTP-binding protein                                | -8.00 |
| Mtr.12258.1.S1_at   | Nonspecific lipid-transfer protein precursor (LTP) | -7.99 |
| Mtr.41860.1.S1_at   | Leucine-rich repeat receptor-like protein kinase 1 | -7.98 |
| Mtr.48501.1.S1_at   | Leucine-rich repeat                                | -7.97 |
| Mtr.10881.1.S1_at   | Hypothetical protein                               | -7.97 |
| Msa.1765.1.S1_at    | Hypothetical protein                               | -7.95 |
| Mtr.8920.1.S1_at    | 2-oxoglutarate/malate translocator                 | -7.94 |
| Mtr.44760.1.S1_at   | Sulfolipid synthase                                | -7.94 |
| Mtr.42492.1.S1_at   | Carboxylesterase-like protein                      | -7.92 |
| Mtr.19934.1.S1_at   | Cysteine proteinase                                | -7.91 |
| Mtr.12672.1.S1_at   | Cytochrome P-450LXXIA1                             | -7.91 |
| Mtr.16355.1.S1_at   | HSP20-like chaperone                               | -7.90 |
| Mtr.9712.1.S1_at    | Copper/zinc superoxide dismutase                   | -7.89 |
| Mtr.43316.1.S1_at   | Symbiotic ammonium transporter                     | -7.88 |
| Mtr.49015.1.S1_at   | Chlorophyll A-B binding protein                    | -7.87 |
| Mtr.41408.1.S1_at   | Hypothetical protein                               | -7.87 |
| Msa.1547.1.S1_at    | Hypothetical protein                               | -7.86 |
| Mtr.51462.1.S1_s_at | Zn-finger, RING                                    | -7.86 |
| Msa.3103.1.S1_at    | Hypothetical protein                               | -7.86 |
| Mtr.11698.1.S1_at   | Hypothetical protein                               | -7.85 |
| Mtr.15871.1.S1_at   | Hypothetical protein                               | -7.84 |
| Mtr.49075.1.S1_at   | Peptidase aspartic                                 | -7.83 |
| Mtr.21341.1.S1_at   | Glutamyl-tRNA reductase                            | -7.83 |
| Mtr.18021.1.S1_at   | Hypothetical protein                               | -7.82 |
| Mtr.7552.1.S1_at    | Hypothetical protein                               | -7.80 |
| Msa.1517.1.S1_at    | Hypothetical protein                               | -7.80 |
| Mtr.37322.1.S1_at   | Hypothetical protein                               | -7.80 |
| Mtr.5768.1.S1_at    | Hypothetical protein                               | -7.80 |
| Mtr.15326.1.S1_at   | ABA/WDS induced protein                            | -7.79 |
| Mtr.18566.1.S1_at   | Pyruvate kinase                                    | -7.79 |
| Mtr.43018.1.S1_at   | Cytochrome P450                                    | -7.79 |

|                     |                                                         |       |
|---------------------|---------------------------------------------------------|-------|
| Mtr.6086.1.S1_s_at  | Sesquiterpene cyclase                                   | -7.78 |
| Mtr.24929.1.S1_at   | Hypothetical protein                                    | -7.78 |
| Mtr.16579.1.S1_x_at | Cytochrome P450                                         | -7.77 |
| Mtr.48959.1.S1_at   | Flavoprotein pyridine nucleotide cytochrome reductase   | -7.77 |
| Mtr.41227.1.S1_at   | Germacrene D synthase                                   | -7.77 |
| Mtr.31169.1.S1_at   | Cytochrome P450                                         | -7.76 |
| Mtr.29995.1.S1_at   | Hypothetical protein                                    | -7.76 |
| Mtr.9757.1.S1_at    | Quinolinate phosphoribosyltransferase                   | -7.75 |
| Mtr.43061.1.S1_s_at | GTP-binding protein                                     | -7.75 |
| Mtr.3511.1.S1_at    | Anthranilate N-hydroxycinnamoyl/benzoyltransferase      | -7.75 |
| Mtr.49684.1.S1_at   | UDP-glucose glucosyltransferase                         | -7.74 |
| Mtr.40327.1.S1_at   | ADP-glucose pyrophosphorylase                           | -7.74 |
| Mtr.34803.1.S1_at   | Glutathione S-conjugate transporting ATPase             | -7.73 |
| Mtr.15289.1.S1_at   | Lipoxygenase                                            | -7.73 |
| Mtr.34390.1.S1_at   | Hypothetical protein                                    | -7.73 |
| Mtr.27269.1.S1_at   | Hypothetical protein                                    | -7.73 |
| Mtr.43912.1.S1_at   | Hypothetical protein                                    | -7.72 |
| Mtr.40528.1.S1_s_at | UOS1                                                    | -7.71 |
| Mtr.41573.1.S1_at   | Double C2-like domain containing protein                | -7.70 |
| Msa.1640.1.S1_at    | Hypothetical protein                                    | -7.70 |
| Msa.1150.1.S1_at    | Hypothetical protein                                    | -7.70 |
| Mtr.15885.1.S1_at   | Hypothetical protein                                    | -7.70 |
| Mtr.12260.1.S1_at   | 2-Cys peroxiredoxin                                     | -7.69 |
| Mtr.31153.1.S1_at   | Hypothetical protein                                    | -7.67 |
| Mtr.39289.1.S1_at   | Flavonoid 1-2 rhamnosyltransferase                      | -7.66 |
| Mtr.33844.1.S1_s_at | Allantoinase                                            | -7.65 |
| Mtr.19902.1.S1_at   | Isochorismate synthases                                 | -7.64 |
| Mtr.44672.1.S1_at   | Glutathione S-transferase GST 7                         | -7.64 |
| Mtr.9818.1.S1_at    | Hypothetical protein                                    | -7.63 |
| Mtr.11082.1.S1_at   | Perchloric acid soluble translation inhibitor protein   | -7.62 |
| Mtr.13744.1.S1_at   | Transmembrane transport protein                         | -7.61 |
| Mtr.25951.1.S1_at   | Hypothetical protein                                    | -7.60 |
| Mtr.18790.1.S1_at   | Esterase/lipase/thioesterase                            | -7.60 |
| Mtr.11025.1.S1_at   | Hypothetical protein                                    | -7.59 |
| Mtr.42279.1.S1_at   | Protease Do-like 8                                      | -7.59 |
| Mtr.27368.1.S1_at   | Hypothetical protein                                    | -7.57 |
| Mtr.1762.1.S1_at    | Plastid RNA polymerase sigma-subunit                    | -7.56 |
| Mtr.44182.1.S1_s_at | LEA protein in group 5                                  | -7.55 |
| Msa.1763.1.S1_at    | Hypothetical protein                                    | -7.55 |
| Mtr.2990.1.S1_at    | Metal resistance protein                                | -7.54 |
| Mtr.40152.1.S1_at   | Oxygen-evolving enhancer protein 2                      | -7.53 |
| Mtr.26195.1.S1_at   | Hypothetical protein                                    | -7.53 |
| Mtr.30845.1.S1_at   | Nodulin-like protein                                    | -7.53 |
| Mtr.40730.1.S1_at   | Thylakoid lumenal 16.5 kDa protein                      | -7.53 |
| Mtr.38437.1.S1_at   | Hypothetical protein                                    | -7.52 |
| Mtr.42842.1.S1_s_at | Ribulose 1,5-bisphosphate carboxylase small subunit     | -7.52 |
| Mtr.5330.1.S1_at    | Serine/threonine protein kinase                         | -7.51 |
| Mtr.26124.1.S1_at   | Hypothetical protein                                    | -7.50 |
| Mtr.37166.1.S1_at   | UDP-glucose:indole-3-acetate beta-D-glucosyltransferase | -7.50 |
| Mtr.13956.1.S1_at   | 2-oxoglutarate/malate translocator                      | -7.50 |
| Mtr.5357.1.S1_at    | ABC transporter                                         | -7.49 |
| Mtr.38608.1.S1_at   | Hypothetical protein                                    | -7.49 |
| Mtr.1747.1.S1_at    | Hypothetical protein                                    | -7.49 |
| Mtr.31624.1.S1_at   | Hypothetical protein                                    | -7.48 |

|                     |                                                    |       |
|---------------------|----------------------------------------------------|-------|
| Mtr.37792.1.S1_at   | Hypothetical protein                               | -7.47 |
| Mtr.6825.1.S1_at    | Hypothetical protein                               | -7.46 |
| Mtr.37744.1.S1_at   | Rieske iron-sulfur protein                         | -7.46 |
| Mtr.5404.1.S1_at    | Receptor protein kinase                            | -7.45 |
| Mtr.1779.1.S1_at    | Hypothetical protein                               | -7.45 |
| Mtr.1036.1.S1_at    | Non-phototropic hypocotyl 3                        | -7.44 |
| Mtr.43567.1.S1_at   | Dimethylaniline monooxygenase                      | -7.44 |
| Mtr.41524.1.S1_at   | Sulfate transporter                                | -7.43 |
| Msa.2593.1.S1_at    | Hypothetical protein                               | -7.43 |
| Mtr.13396.1.S1_at   | Hypothetical protein                               | -7.43 |
| Mtr.22277.1.S1_s_at | Hypothetical protein                               | -7.41 |
| Msa.1528.1.S1_at    | Hypothetical protein                               | -7.41 |
| Mtr.50437.1.S1_s_at | Hypothetical protein                               | -7.40 |
| Msa.3052.1.S1_at    | Hypothetical protein                               | -7.40 |
| Mtr.10136.1.S1_at   | Hypothetical protein                               | -7.39 |
| Mtr.1911.1.S1_s_at  | Hypothetical protein                               | -7.39 |
| Mtr.12188.1.S1_at   | Hypothetical protein                               | -7.38 |
| Mtr.2057.1.S1_s_at  | Glutamate/malate translocator                      | -7.38 |
| Mtr.9168.1.S1_at    | Hypothetical protein                               | -7.37 |
| Mtr.50743.1.S1_at   | Hypothetical protein                               | -7.36 |
| Mtr.45291.1.S1_at   | Hypothetical protein                               | -7.36 |
| Mtr.45562.1.S1_at   | Nuclear shuttle interacting protein                | -7.36 |
| Mtr.42253.1.S1_at   | Hypothetical protein                               | -7.35 |
| Msa.2813.1.S1_at    | Hypothetical protein                               | -7.35 |
| Mtr.40869.1.S1_at   | Hypothetical protein                               | -7.35 |
| Mtr.49172.1.S1_at   | Hypothetical protein                               | -7.34 |
| Mtr.31750.1.S1_at   | Sulfate transporter                                | -7.34 |
| Mtr.28722.1.S1_at   | Peptide transporter-like protein                   | -7.34 |
| Mtr.13528.1.S1_at   | Anthranilate N-hydroxycinnamoyl/benzoyltransferase | -7.34 |
| Mtr.41106.1.S1_at   | Hypothetical protein                               | -7.33 |
| Msa.2963.1.S1_at    | Hypothetical protein                               | -7.33 |
| Mtr.45371.1.S1_at   | Small signal peptidase                             | -7.33 |
| Mtr.45476.1.S1_at   | Metal-transporting P-type ATPase                   | -7.33 |
| Msa.1766.1.S1_at    | Hypothetical protein                               | -7.33 |
| Mtr.34167.1.S1_at   | Hypothetical protein                               | -7.32 |
| Mtr.49627.1.S1_at   | Hypothetical protein                               | -7.32 |
| Mtr.43533.1.S1_at   | Maturation polypeptide                             | -7.31 |
| Mtr.8219.1.S1_at    | Hypothetical protein                               | -7.31 |
| Mtr.2640.1.S1_at    | Pullulanase-like protein                           | -7.30 |
| Mtr.37814.1.S1_at   | CONSTANS-like protein                              | -7.30 |
| Mtr.38747.1.S1_s_at | Sugar transporter                                  | -7.28 |
| Mtr.4407.1.S1_at    | Transcription factor, CCAAT-binding                | -7.28 |
| Mtr.40379.1.S1_at   | Leucoanthocyanidin dioxygenase                     | -7.27 |
| Mtr.15484.1.S1_at   | Peroxidase                                         | -7.27 |
| Mtr.33854.1.S1_at   | Hypothetical protein                               | -7.27 |
| Mtr.46061.1.S1_s_at | Dynamin GTPase effector                            | -7.26 |
| Mtr.37767.1.S1_at   | Hypothetical protein                               | -7.25 |
| Msa.1320.1.S1_at    | Hypothetical protein                               | -7.25 |
| Mtr.15409.1.S1_at   | Protein prenyltransferase                          | -7.25 |
| Mtr.15245.1.S1_at   | ABC transporter                                    | -7.25 |
| Mtr.12256.1.S1_at   | Nonspecific lipid-transfer protein precursor (LTP) | -7.25 |
| Mtr.51379.1.S1_at   | Basic helix-loop-helix                             | -7.24 |
| Mtr.48548.1.S1_at   | Deoxyxylulose-5-phosphate synthase                 | -7.23 |
| Msa.1062.1.S1_at    | Hypothetical protein                               | -7.23 |

|                     |                                                            |       |
|---------------------|------------------------------------------------------------|-------|
| Mtr.17441.1.S1_at   | Glycoside hydrolase                                        | -7.21 |
| Msa.1741.1.S1_at    | Hypothetical protein                                       | -7.20 |
| Mtr.12602.1.S1_at   | Mitogen-activated protein kinase                           | -7.20 |
| Mtr.39163.1.S1_at   | Hypothetical protein                                       | -7.20 |
| Mtr.24061.1.S1_at   | Hypothetical protein                                       | -7.20 |
| Mtr.43091.1.S1_s_at | Seed maturation protein LEA 4                              | -7.20 |
| Msa.1561.1.S1_at    | Hypothetical protein                                       | -7.20 |
| Mtr.37745.1.S1_at   | Hypothetical protein                                       | -7.17 |
| Mtr.9270.1.S1_at    | Hypothetical protein                                       | -7.17 |
| Mtr.44282.1.S1_s_at | THA4 protein                                               | -7.17 |
| Mtr.43079.1.S1_at   | Farnesyl-diphosphate farnesyltransferase                   | -7.17 |
| Mtr.31623.1.S1_at   | Hypothetical protein                                       | -7.16 |
| Mtr.40190.1.S1_at   | Flowering promoting factor                                 | -7.16 |
| Mtr.22096.1.S1_at   | EIX receptor 1                                             | -7.15 |
| Mtr.5844.1.S1_at    | Ternary complex factor MIP1-like protein                   | -7.15 |
| Mtr.20397.1.S1_s_at | Amidase, hydantoinase/carbamoylase                         | -7.14 |
| Mtr.7329.1.S1_at    | Ribulose-1,5-bisphosphate carboxylase small subunit        | -7.14 |
| Mtr.42820.1.S1_at   | RING/C3HC4/PHD zinc finger protein                         | -7.14 |
| Mtr.32860.1.S1_s_at | Hypothetical protein                                       | -7.14 |
| Mtr.48535.1.S1_at   | Hypothetical protein                                       | -7.13 |
| Mtr.44533.1.S1_at   | Hypothetical protein                                       | -7.13 |
| Mtr.39390.1.S1_at   | Phosphoenolpyruvate carboxylase                            | -7.12 |
| Mtr.42326.1.S1_s_at | Hypothetical protein                                       | -7.11 |
| Mtr.5845.1.S1_at    | Hypothetical protein                                       | -7.11 |
| Msa.1109.1.S1_at    | Hypothetical protein                                       | -7.11 |
| Mtr.11185.1.S1_at   | SEX1                                                       | -7.10 |
| Mtr.11562.1.S1_at   | Diphosphonucleotide phosphatase 1                          | -7.10 |
| Mtr.41412.1.S1_at   | Thylakoid lumenal 18 kDa protein                           | -7.09 |
| Mtr.30722.1.S1_at   | Hypothetical protein                                       | -7.08 |
| Mtr.24070.1.S1_at   | Plastid-lipid associated protein                           | -7.08 |
| Mtr.43633.1.S1_at   | Hypothetical protein                                       | -7.08 |
| Mtr.12063.1.S1_at   | Hypothetical protein                                       | -7.07 |
| Mtr.11016.1.S1_at   | Hypothetical protein                                       | -7.07 |
| Mtr.41145.1.S1_at   | Peroxisomal copper-containing amine oxidase                | -7.07 |
| Mtr.2611.1.S1_at    | Protein kinase                                             | -7.06 |
| Mtr.40149.1.S1_at   | Thiazole biosynthetic enzyme                               | -7.06 |
| Mtr.12725.1.S1_at   | Mucin-like protein                                         | -7.06 |
| Mtr.11931.1.S1_at   | Long chain acyl-CoA synthetase                             | -7.06 |
| Mtr.47780.1.S1_at   | Expansin, putative                                         | -7.05 |
| Mtr.12846.1.S1_at   | MAP3K                                                      | -7.05 |
| Mtr.34485.1.S1_at   | Hypothetical protein                                       | -7.05 |
| Msa.2820.1.S1_at    | Hypothetical protein                                       | -7.05 |
| Mtr.848.1.S1_s_at   | Hypothetical protein                                       | -7.05 |
| Mtr.42585.1.S1_at   | Hypothetical protein                                       | -7.04 |
| Mtr.37783.1.S1_at   | Epoxide hydrolase                                          | -7.04 |
| Mtr.18312.1.S1_at   | Hypothetical protein                                       | -7.02 |
| Mtr.10402.1.S1_at   | Type II chlorophyll a/b binding protein from photosystem I | -7.01 |
| Mtr.8942.1.S1_at    | Desiccation protectant protein Lea14                       | -7.01 |
| Mtr.6756.1.S1_at    | ABC transporter                                            | -7.00 |
| Msa.3105.1.S1_at    | Hypothetical protein                                       | -7.00 |
| Mtr.10207.1.S1_at   | Early E3 20.6 kDa glycoprotein                             | -6.99 |
| Mtr.46949.1.S1_at   | Hypothetical protein                                       | -6.98 |
| Mtr.42902.1.S1_at   | VuP5CS protein                                             | -6.97 |
| Mtr.35532.1.S1_at   | Bg55 protein                                               | -6.97 |

|                     |                                                     |       |
|---------------------|-----------------------------------------------------|-------|
| Mtr.9264.1.S1_at    | Hypothetical protein                                | -6.97 |
| Mtr.13374.1.S1_at   | Protein kinase                                      | -6.97 |
| Mtr.49977.1.S1_at   | Hypothetical protein                                | -6.96 |
| Mtr.41089.1.S1_at   | Hypothetical protein                                | -6.96 |
| Mtr.43655.1.S1_at   | Glucosyltransferase                                 | -6.96 |
| Mtr.15886.1.S1_at   | Hypothetical protein                                | -6.96 |
| Mtr.35696.1.S1_at   | Hypothetical protein                                | -6.95 |
| Mtr.44854.1.S1_at   | Hypothetical protein                                | -6.94 |
| Mtr.41481.1.S1_at   | Phosphate translocator                              | -6.94 |
| Mtr.40480.1.S1_at   | Allantoinase                                        | -6.94 |
| Mtr.27314.1.S1_s_at | Heat shock transcription factor                     | -6.94 |
| Mtr.13413.1.S1_at   | Transporter like protein                            | -6.94 |
| Mtr.18237.1.S1_at   | Hypothetical protein                                | -6.92 |
| Mtr.38446.1.S1_s_at | Ferredoxin-thioredoxin reductase                    | -6.92 |
| Mtr.6771.1.S1_s_at  | Hypothetical protein                                | -6.92 |
| Mtr.50224.1.S1_s_at | FYVE/PHD zinc finger                                | -6.92 |
| Mtr.31392.1.S1_s_at | Desiccation protectant protein                      | -6.92 |
| Mtr.43148.1.S1_at   | Myb-related transcription factor MYB59              | -6.92 |
| Mtr.33613.1.S1_at   | Hypothetical protein                                | -6.91 |
| Mtr.39411.1.S1_at   | Sulfate transporter 3.3                             | -6.90 |
| Mtr.39699.1.S1_at   | Hypothetical protein                                | -6.89 |
| Mtr.27055.1.S1_at   | Plastid RNA polymerase                              | -6.88 |
| Mtr.43037.1.S1_at   | Glyoxysomal malate dehydrogenase                    | -6.87 |
| Mtr.36996.1.S1_at   | Hypothetical protein                                | -6.86 |
| Mtr.42326.1.S1_at   | Hypothetical protein                                | -6.85 |
| Mtr.44150.1.S1_at   | Myristoyl-acyl carrier protein thioesterase         | -6.84 |
| Mtr.37518.1.S1_at   | Nodulin-like protein                                | -6.84 |
| Mtr.41151.1.S1_s_at | Cer2 protein                                        | -6.84 |
| Mtr.33903.1.S1_s_at | GTP-binding protein                                 | -6.84 |
| Msa.1776.1.S1_at    | Hypothetical protein                                | -6.83 |
| Mtr.37624.1.S1_at   | 3-beta-hydroxysteroiddehydrogenase                  | -6.83 |
| Mtr.12899.1.S1_at   | Hypothetical protein                                | -6.83 |
| Mtr.47758.1.S1_at   | bHLH protein family                                 | -6.82 |
| Mtr.33055.1.S1_s_at | Hypothetical protein                                | -6.82 |
| Mtr.14004.1.S1_at   | Hypothetical protein                                | -6.81 |
| Mtr.45016.1.S1_at   | Hypothetical protein                                | -6.80 |
| Mtr.44793.1.S1_at   | Hypothetical protein                                | -6.80 |
| Mtr.11186.1.S1_at   | Pyruvate, phosphate dikinase                        | -6.80 |
| Mtr.11829.1.S1_at   | Hypothetical protein                                | -6.80 |
| Mtr.12884.1.S1_at   | Thioredoxin x                                       | -6.80 |
| Mtr.38557.1.S1_at   | MAP kinase protein                                  | -6.79 |
| Mtr.43358.1.S1_at   | Outer membrane lipoprotein                          | -6.79 |
| Mtr.33417.1.S1_at   | MRP-like ABC transporter                            | -6.79 |
| Mtr.43087.1.S1_at   | Pectin methylesterase                               | -6.78 |
| Mtr.18020.1.S1_at   | Hypothetical protein                                | -6.78 |
| Msa.1177.1.S1_at    | Hypothetical protein                                | -6.78 |
| Mtr.13801.1.S1_at   | Hypothetical protein                                | -6.78 |
| Mtr.5313.1.S1_s_at  | Hypothetical protein                                | -6.78 |
| Mtr.6780.1.S1_at    | Starch synthase IVb                                 | -6.78 |
| Mtr.12203.1.S1_at   | Ribulose 1,6-bisphosphate carboxylase small subunit | -6.77 |
| Mtr.24695.1.S1_at   | NADH dehydrogenase                                  | -6.77 |
| Mtr.24717.1.S1_s_at | Arabinogalactan protein                             | -6.77 |
| Mtr.42733.1.S1_at   | Histone H1                                          | -6.76 |
| Mtr.10799.1.S1_at   | Multi resistance protein                            | -6.76 |

|                     |                                                 |       |
|---------------------|-------------------------------------------------|-------|
| Msa.2782.1.S1_at    | Hypothetical protein                            | -6.75 |
| Mtr.38066.1.S1_at   | Cinnamyl alcohol dehydrogenase                  | -6.75 |
| Msa.1744.1.S1_at    | Hypothetical protein                            | -6.74 |
| Msa.1508.1.S1_at    | Hypothetical protein                            | -6.74 |
| Mtr.34597.1.S1_s_at | Hypothetical protein                            | -6.74 |
| Mtr.45956.1.S1_at   | Lipase/lipoxygenase                             | -6.73 |
| Mtr.8818.1.S1_at    | Hypothetical protein                            | -6.73 |
| Mtr.37429.1.S1_at   | Cytosolic aldehyde dehydrogenase                | -6.72 |
| Msa.1808.1.S1_at    | Hypothetical protein                            | -6.72 |
| Mtr.42608.1.S1_at   | Polysaccharide polymerase                       | -6.71 |
| Mtr.44836.1.S1_at   | Hypothetical protein                            | -6.71 |
| Mtr.10595.1.S1_s_at | Seed maturation protein PM36                    | -6.70 |
| Msa.900.1.S1_s_at   | Hypothetical protein                            | -6.69 |
| Mtr.34747.1.S1_at   | Hypothetical protein                            | -6.69 |
| Mtr.12983.1.S1_at   | Isp4 like protein                               | -6.69 |
| Msa.3170.1.S1_at    | Hypothetical protein                            | -6.68 |
| Mtr.37811.1.S1_at   | Hypothetical protein                            | -6.68 |
| Mtr.11408.1.S1_at   | Hypothetical protein                            | -6.67 |
| Mtr.6141.1.S1_s_at  | Alpha-expansin                                  | -6.66 |
| Mtr.32580.1.S1_at   | Alpha-mannosidase                               | -6.66 |
| Mtr.16218.1.S1_s_at | Homeodomain-like protein                        | -6.65 |
| Msa.1421.1.S1_at    | Hypothetical protein                            | -6.64 |
| Mtr.12779.1.S1_at   | Photosystem II stability/assembly factor HCF136 | -6.63 |
| Mtr.21614.1.S1_at   | Hypothetical protein                            | -6.63 |
| Mtr.10685.1.S1_at   | Hypothetical protein                            | -6.63 |
| Mtr.29366.1.S1_at   | Serine/threonine protein kinase                 | -6.62 |
| Mtr.39748.1.S1_at   | Hypothetical protein                            | -6.62 |
| Mtr.9805.1.S1_at    | Hypothetical protein                            | -6.61 |
| Mtr.37156.1.S1_at   | Hypothetical protein                            | -6.61 |
| Mtr.11795.1.S1_at   | Proline-rich protein                            | -6.60 |
| Mtr.47648.1.S1_at   | Hypothetical protein                            | -6.59 |
| Mtr.34797.1.S1_at   | Hypothetical protein                            | -6.59 |
| Mtr.40422.1.S1_at   | Dihydrolipoyl dehydrogenase                     | -6.59 |
| Mtr.41047.1.S1_at   | Hypothetical protein                            | -6.59 |
| Mtr.6035.1.S1_at    | UDP-glycosyltransferase 74G1                    | -6.58 |
| Mtr.13053.1.S1_s_at | Uroporphyrin III methylase                      | -6.58 |
| Mtr.38938.1.S1_at   | Hypothetical protein                            | -6.58 |
| Mtr.2641.1.S1_at    | Hypothetical protein                            | -6.57 |
| Msa.2926.1.S1_s_at  | Hypothetical protein                            | -6.56 |
| Mtr.39327.1.S1_at   | Hypothetical protein                            | -6.56 |
| Mtr.10011.1.S1_at   | Hypothetical protein                            | -6.55 |
| Mtr.31127.1.S1_s_at | ERD4 protein                                    | -6.54 |
| Mtr.39005.1.S1_at   | Nitrate transporter                             | -6.53 |
| Mtr.30134.1.S1_at   | Serine carboxipeptidase                         | -6.52 |
| Mtr.40443.1.S1_at   | 50S ribosomal protein L13                       | -6.51 |
| Mtr.33027.1.S1_at   | Hypothetical protein                            | -6.51 |
| Mtr.24210.1.S1_at   | Hypothetical protein                            | -6.51 |
| Mtr.22990.1.S1_at   | Receptor-like protein kinase 1                  | -6.50 |
| Mtr.44017.1.S1_at   | Seed maturation protein                         | -6.50 |
| Mtr.49627.1.S1_x_at | Hypothetical protein                            | -6.50 |
| Mtr.45049.1.S1_at   | Hypothetical protein                            | -6.49 |
| Mtr.9169.1.S1_at    | Hypothetical protein                            | -6.49 |
| Mtr.34752.1.S1_s_at | Hypothetical protein                            | -6.49 |
| Mtr.44524.1.S1_at   | Hypothetical protein                            | -6.49 |

|                     |                                                   |       |
|---------------------|---------------------------------------------------|-------|
| Mtr.52193.1.S1_at   | Glycoside hydrolase                               | -6.49 |
| Mtr.33453.1.S1_at   | Hypothetical protein                              | -6.48 |
| Mtr.40236.1.S1_s_at | Hypothetical protein                              | -6.47 |
| Mtr.21678.1.S1_at   | YABBY protein                                     | -6.47 |
| Mtr.16894.1.S1_at   | Zn-finger, CCHC type                              | -6.46 |
| Mtr.50932.1.S1_at   | Myb, DNA-binding;                                 | -6.46 |
| Msa.1072.1.S1_at    | Hypothetical protein                              | -6.46 |
| Msa.1845.1.S1_at    | Hypothetical protein                              | -6.46 |
| Mtr.18280.1.S1_at   | Serine/threonine protein kinase                   | -6.45 |
| Mtr.5510.1.S1_at    | Hypothetical protein                              | -6.44 |
| Msa.925.1.S1_at     | Hypothetical protein                              | -6.44 |
| Mtr.15923.1.S1_at   | Peptidylprolyl isomerase, FKBP-type               | -6.43 |
| Mtr.32475.1.S1_s_at | Hypothetical protein                              | -6.43 |
| Mtr.1753.1.S1_at    | Hypothetical protein                              | -6.41 |
| Mtr.34827.1.S1_at   | Hypothetical protein                              | -6.41 |
| Mtr.39433.1.S1_at   | Xyloglucan endotransglucosylase/hydrolase protein | -6.41 |
| Mtr.33894.1.S1_at   | Tetracycline transporter                          | -6.41 |
| Mtr.41485.1.S1_at   | Dynamin-like protein                              | -6.41 |
| Mtr.48197.1.S1_at   | Hypothetical protein                              | -6.40 |
| Mtr.43132.1.S1_at   | CND41, chloroplast nucleoid DNA binding protein   | -6.40 |
| Mtr.37673.1.S1_at   | Hypothetical protein                              | -6.39 |
| Mtr.2078.1.S1_at    | Cell death regulator                              | -6.39 |
| Mtr.44745.1.S1_at   | Ferredoxin                                        | -6.38 |
| Mtr.41314.1.S1_at   | Pyruvate, phosphate dikinase                      | -6.38 |
| Mtr.44090.1.S1_at   | Hypothetical protein                              | -6.38 |
| Mtr.28080.1.S1_at   | Anthocyanin 5-aromatic acyltransferase            | -6.38 |
| Mtr.11741.1.S1_at   | Hydrolase, alpha/beta fold protein                | -6.37 |
| Msa.1632.1.S1_at    | Hypothetical protein                              | -6.37 |
| Mtr.38033.1.S1_at   | bZIP transcription factor                         | -6.37 |
| Mtr.33113.1.S1_at   | Hypothetical protein                              | -6.37 |
| Mtr.44288.1.S1_at   | Hypothetical protein                              | -6.36 |
| Mtr.40991.1.S1_at   | Limonoid UDP-glucosyltransferase                  | -6.36 |
| Mtr.44189.1.S1_at   | BEL1-related homeotic protein 14                  | -6.36 |
| Mtr.33645.1.S1_at   | Lipoate-protein ligase                            | -6.35 |
| Mtr.6081.1.S1_at    | Family II lipase EXL2                             | -6.35 |
| Mtr.42445.1.S1_at   | Hypothetical protein                              | -6.35 |
| Mtr.37531.1.S1_at   | Hypothetical protein                              | -6.34 |
| Msa.3011.1.S1_at    | Hypothetical protein                              | -6.34 |
| Mtr.44654.1.S1_at   | Hypothetical protein                              | -6.33 |
| Mtr.40437.1.S1_at   | ABC transporter                                   | -6.33 |
| Mtr.46510.1.S1_x_at | Alpha/beta-amyrin synthase                        | -6.32 |
| Mtr.37274.1.S1_at   | Aquaporin 2                                       | -6.32 |
| Mtr.30437.1.S1_at   | Hypothetical protein                              | -6.32 |
| Mtr.19479.1.S1_at   | Glutaredoxin                                      | -6.31 |
| Mtr.919.1.S1_s_at   | Hypothetical protein                              | -6.31 |
| Msa.1122.1.S1_at    | Hypothetical protein                              | -6.31 |
| Mtr.50754.1.S1_at   | Hypothetical protein                              | -6.31 |
| Mtr.7067.1.S1_at    | Beta-galactosidase                                | -6.30 |
| Mtr.21261.1.S1_s_at | Multicopper oxidase                               | -6.29 |
| Mtr.11208.1.S1_at   | Hypothetical protein                              | -6.29 |
| Mtr.8777.1.S1_at    | Hypothetical protein                              | -6.29 |
| Mtr.12223.1.S1_at   | Hypothetical protein                              | -6.28 |
| Mtr.34832.1.S1_at   | Hypothetical protein                              | -6.27 |
| Mtr.7873.1.S1_at    | Ribonuclease HII                                  | -6.27 |



|                    |                                                                   |       |
|--------------------|-------------------------------------------------------------------|-------|
| Mtr.1796.1.S1_at   | Hypothetical protein                                              | -6.27 |
| Msa.1357.1.S1_at   | Hypothetical protein                                              | -6.26 |
| Mtr.1405.1.S1_at   | Hypothetical protein                                              | -6.26 |
| Mtr.32024.1.S1_at  | Hypothetical protein                                              | -6.26 |
| Mtr.22041.1.S1_at  | Hypothetical protein                                              | -6.26 |
| Mtr.45853.1.S1_at  | Esterase/lipase/thioesterase                                      | -6.25 |
| Mtr.45338.1.S1_at  | Cytochrome P450                                                   | -6.25 |
| Mtr.6757.1.S1_at   | Thaumatococcal protein                                            | -6.25 |
| Mtr.34732.1.S1_at  | Trehalose-6-phosphate synthase                                    | -6.24 |
| Mtr.40886.1.S1_at  | Hypothetical protein                                              | -6.24 |
| Mtr.35957.1.S1_at  | Germin-like protein                                               | -6.22 |
| Mtr.7068.1.S1_at   | Threonyl-tRNA synthetase                                          | -6.22 |
| Mtr.26499.1.S1_at  | Lateral organ boundaries (LOB) domain protein                     | -6.22 |
| Mtr.15385.1.S1_at  | UbiA prenyltransferase                                            | -6.20 |
| Mtr.10423.1.S1_at  | Hypothetical protein                                              | -6.19 |
| Mtr.37389.1.S1_at  | Triose phosphate/phosphate translocator                           | -6.19 |
| Mtr.1639.1.S1_at   | Hypothetical protein                                              | -6.19 |
| Mtr.38919.1.S1_at  | Hypothetical protein                                              | -6.18 |
| Mtr.20794.1.S1_at  | Plant lipid transfer/seed storage/trypsin-alpha amylase inhibitor | -6.18 |
| Msa.3151.1.S1_at   | Hypothetical protein                                              | -6.17 |
| Mtr.20801.1.S1_at  | Homeodomain-like protein                                          | -6.17 |
| Mtr.4048.1.S1_at   | Hypothetical protein                                              | -6.17 |
| Msa.3097.1.S1_at   | Hypothetical protein                                              | -6.16 |
| Mtr.44620.1.S1_at  | Polygalacturonase                                                 | -6.16 |
| Mtr.13967.1.S1_at  | Phosphoenolpyruvate carboxylase                                   | -6.15 |
| Mtr.24075.1.S1_at  | Mannitol dehydrogenase                                            | -6.14 |
| Msa.3084.1.S1_at   | Hypothetical protein                                              | -6.13 |
| Mtr.25648.1.S1_at  | Amino acid transporter                                            | -6.12 |
| Mtr.8972.1.S1_at   | Hypothetical protein                                              | -6.12 |
| Mtr.11162.1.S1_at  | GTP-binding protein LepA-like protein                             | -6.12 |
| Mtr.8953.1.S1_s_at | bZIP transcription factor                                         | -6.12 |
| Mtr.51597.1.S1_at  | Hypothetical protein                                              | -6.12 |
| Mtr.9831.1.S1_at   | Mechanosensitive ion channel domain-containing protein            | -6.12 |
| Mtr.3101.1.S1_at   | Hypothetical protein                                              | -6.11 |
| Mtr.16311.1.S1_at  | Hypothetical protein                                              | -6.11 |
| Mtr.35600.1.S1_at  | Pyrroline-5-carboxylate reductase                                 | -6.11 |
| Mtr.41133.1.S1_at  | Bell-like homeodomain protein 3                                   | -6.11 |
| Mtr.1429.1.S1_s_at | Hypothetical protein                                              | -6.10 |
| Mtr.43001.1.S1_at  | Aminotransferase 2,                                               | -6.10 |
| Mtr.13575.1.S1_at  | Hypothetical protein                                              | -6.09 |
| Mtr.34896.1.S1_at  | Receptor-like protein kinase                                      | -6.09 |
| Mtr.11988.1.S1_at  | Tryptophanyl-tRNA synthetase                                      | -6.08 |
| Msa.3002.1.S1_at   | Hypothetical protein                                              | -6.08 |
| Mtr.11265.1.S1_at  | Glycosyl hydrolase                                                | -6.08 |
| Mtr.43636.1.S1_at  | Fructose-6-phosphate 2-kinase/fructose-2,6-bisphosphatase         | -6.08 |
| Mtr.11421.1.S1_at  | Ripening-related protein                                          | -6.07 |
| Mtr.42133.1.S1_at  | Protein kinase                                                    | -6.06 |
| Mtr.41850.1.S1_at  | UOS1                                                              | -6.06 |
| Msa.3188.1.S1_at   | Hypothetical protein                                              | -6.06 |
| Mtr.10615.1.S1_at  | Cellulose synthase catalytic subunit                              | -6.06 |
| Mtr.37547.1.S1_at  | Hypothetical protein                                              | -6.05 |
| Mtr.13545.1.S1_at  | Hypothetical protein                                              | -6.05 |
| Mtr.13979.1.S1_at  | Lipid transfer protein                                            | -6.04 |
| Mtr.41668.1.S1_at  | Ribulose-bisphosphate carboxylase activase large isoform protein  | -6.04 |

|                     |                                                              |       |
|---------------------|--------------------------------------------------------------|-------|
| Mtr.41251.1.S1_at   | Hypothetical protein                                         | -6.03 |
| Msa.1523.1.S1_at    | Hypothetical protein                                         | -6.03 |
| Msa.2534.1.S1_at    | Hypothetical protein                                         | -6.02 |
| Mtr.46448.1.S1_s_at | Hypothetical protein                                         | -6.02 |
| Msa.1434.1.S1_at    | Hypothetical protein                                         | -6.02 |
| Mtr.30692.1.S1_at   | Receptor-protein kinase                                      | -6.01 |
| Mtr.11739.1.S1_s_at | Homogentisate phytylprenyltransferase                        | -5.99 |
| Mtr.39943.1.S1_at   | Hypothetical protein                                         | -5.99 |
| Mtr.40676.1.S1_at   | CND41, chloroplast nucleoid DNA binding protein              | -5.99 |
| Mtr.51925.1.S1_at   | Hypothetical protein                                         | -5.98 |
| Mtr.44020.1.S1_at   | Brn1-like protein                                            | -5.98 |
| Mtr.10648.1.S1_at   | UOS1                                                         | -5.97 |
| Mtr.40473.1.S1_at   | Lipid transfer protein                                       | -5.97 |
| Mtr.5586.1.S1_s_at  | Beta-carotene hydroxylase                                    | -5.97 |
| Msa.3148.1.S1_at    | Hypothetical protein                                         | -5.96 |
| Mtr.39095.1.S1_at   | Alcohol oxidase                                              | -5.96 |
| Mtr.23402.1.S1_at   | Aldehyde dehydrogenase                                       | -5.95 |
| Mtr.10231.1.S1_at   | Hypothetical protein                                         | -5.95 |
| Mtr.4994.1.S1_at    | Hypothetical protein                                         | -5.95 |
| Mtr.28667.1.S1_at   | Hypothetical protein                                         | -5.95 |
| Mtr.12410.1.S1_at   | Fructose-1,6-bisphosphatase                                  | -5.95 |
| Mtr.12349.1.S1_at   | Hypothetical protein                                         | -5.95 |
| Mtr.13232.1.S1_at   | Hypothetical protein                                         | -5.95 |
| Mtr.41624.1.S1_at   | SEC14 cytosolic factor                                       | -5.94 |
| Mtr.45139.1.S1_at   | Sulfate transporter 4.1                                      | -5.94 |
| Mtr.52045.1.S1_at   | Hypothetical protein                                         | -5.94 |
| Mtr.50562.1.S1_s_at | Zn-finger, Dof type                                          | -5.94 |
| Mtr.5741.1.S1_s_at  | Lipoate-protein ligase                                       | -5.93 |
| Mtr.35894.1.S1_at   | Hypothetical protein                                         | -5.93 |
| Mtr.44852.1.S1_at   | Glu-tRNA(Gln) amidotransferase subunit B                     | -5.93 |
| Mtr.50952.1.S1_at   | Ribosomal protein L9                                         | -5.92 |
| Mtr.39387.1.S1_s_at | DCL protein                                                  | -5.91 |
| Mtr.44282.1.S1_at   | THA4 protein                                                 | -5.91 |
| Mtr.34494.1.S1_at   | Hypothetical protein                                         | -5.91 |
| Mtr.52185.1.S1_at   | Hypothetical protein                                         | -5.90 |
| Mtr.26161.1.S1_at   | Peroxisomal membrane protein                                 | -5.90 |
| Mtr.43371.1.S1_at   | Peroxidase 55                                                | -5.90 |
| Mtr.875.1.S1_s_at   | Thioredoxin x                                                | -5.89 |
| Msa.1112.1.S1_at    | Hypothetical protein                                         | -5.89 |
| Mtr.13533.1.S1_at   | Hypothetical protein                                         | -5.88 |
| Mtr.17374.1.S1_at   | C4-dicarboxylate transporter/malic acid transport protein    | -5.88 |
| Mtr.33398.1.S1_s_at | Hypothetical protein                                         | -5.88 |
| Mtr.9952.1.S1_at    | Hypothetical protein                                         | -5.88 |
| Mtr.12037.1.S1_at   | Hypothetical protein                                         | -5.88 |
| Mtr.7911.1.S1_s_at  | ER1-like receptor kinase                                     | -5.87 |
| Mtr.46060.1.S1_at   | Hypothetical protein                                         | -5.87 |
| Mtr.51204.1.S1_at   | Amine oxidase                                                | -5.86 |
| Mtr.5242.1.S1_at    | Cellulose synthase                                           | -5.86 |
| Mtr.8497.1.S1_at    | PSI light-harvesting antenna chlorophyll a/b-binding protein | -5.86 |
| Msa.1689.1.S1_at    | Hypothetical protein                                         | -5.85 |
| Mtr.36469.1.S1_at   | Hypothetical protein                                         | -5.85 |
| Mtr.9315.1.S1_at    | Hypothetical protein                                         | -5.84 |
| Mtr.32674.1.S1_at   | Alr1013 protein                                              | -5.83 |
| Mtr.11359.1.S1_at   | Hypothetical protein                                         | -5.83 |

|                     |                                                           |       |
|---------------------|-----------------------------------------------------------|-------|
| Mtr.44847.1.S1_s_at | Glycosyltransferase family protein                        | -5.83 |
| Mtr.41877.1.S1_at   | Hypothetical protein                                      | -5.83 |
| Mtr.32411.1.S1_a_at | Hypothetical protein                                      | -5.82 |
| Mtr.8844.1.S1_at    | Mitogen-activated protein kinase                          | -5.82 |
| Mtr.38019.1.S1_at   | Lil3 protein                                              | -5.81 |
| Mtr.37759.1.S1_at   | Hypothetical protein                                      | -5.81 |
| Mtr.33522.1.S1_at   | Hypothetical protein                                      | -5.81 |
| Mtr.46046.1.S1_at   | Lipolytic enzyme                                          | -5.80 |
| Mtr.36804.1.S1_at   | Hypothetical protein                                      | -5.79 |
| Mtr.38983.1.S1_at   | Hypothetical protein                                      | -5.79 |
| Mtr.31199.1.S1_s_at | Cytochrome P450                                           | -5.79 |
| Mtr.39220.1.S1_at   | Methyltransferase                                         | -5.78 |
| Mtr.27862.1.S1_s_at | Hypothetical protein                                      | -5.77 |
| Mtr.35361.1.S1_at   | Fructose-6-phosphate 2-kinase/fructose-2,6-bisphosphatase | -5.77 |
| Mtr.37372.1.S1_at   | Dehydroascorbate reductase                                | -5.76 |
| Mtr.9532.1.S1_at    | Hypothetical protein                                      | -5.76 |
| Mtr.10480.1.S1_at   | Glutamine synthetase                                      | -5.75 |
| Mtr.38436.1.S1_at   | Cyclin-like protein                                       | -5.75 |
| Mtr.8509.1.S1_at    | Hypothetical protein                                      | -5.74 |
| Msa.1462.1.S1_at    | Hypothetical protein                                      | -5.74 |
| Mtr.5120.1.S1_at    | Hypothetical protein                                      | -5.74 |
| Mtr.34697.1.S1_at   | THA4 protein                                              | -5.74 |
| Mtr.13951.1.S1_at   | Hypothetical protein                                      | -5.73 |
| Mtr.19984.1.S1_at   | Hypothetical protein                                      | -5.73 |
| Mtr.38441.1.S1_at   | Hypothetical protein                                      | -5.73 |
| Mtr.17358.1.S1_at   | Protein synthesis factor                                  | -5.73 |
| Mtr.44687.1.S1_at   | Hypothetical protein                                      | -5.73 |
| Msa.3149.1.S1_at    | Hypothetical protein                                      | -5.72 |
| Mtr.38693.1.S1_at   | Hypothetical protein                                      | -5.72 |
| Mtr.51752.1.S1_at   | Short-chain dehydrogenase/reductase                       | -5.72 |
| Mtr.20636.1.S1_at   | NAD-dependent epimerase/dehydratase                       | -5.71 |
| Mtr.39164.1.S1_at   | Hypothetical protein                                      | -5.71 |
| Mtr.12363.1.S1_at   | Hypothetical protein                                      | -5.71 |
| Msa.1866.1.S1_at    | Hypothetical protein                                      | -5.71 |
| Mtr.17798.1.S1_at   | GNS1/SUR4 membrane protein                                | -5.71 |
| Mtr.12306.1.S1_at   | Hypothetical protein                                      | -5.71 |
| Mtr.40844.1.S1_at   | Diphosphonucleotide phosphatase 1                         | -5.70 |
| Mtr.42974.1.S1_at   | Hydroxyisourate hydrolase                                 | -5.70 |
| Mtr.13202.1.S1_at   | Cellulose synthase CesA-1                                 | -5.69 |
| Mtr.44411.1.S1_at   | Peptide methionine sulfoxide reductase                    | -5.69 |
| Mtr.28737.1.S1_at   | Homeodomain protein                                       | -5.68 |
| Mtr.45813.1.S1_at   | Hypothetical protein                                      | -5.68 |
| Msa.2963.1.S1_s_at  | Hypothetical protein                                      | -5.68 |
| Mtr.8730.1.S1_at    | Hypothetical protein                                      | -5.68 |
| Mtr.45567.1.S1_at   | Fatty aldehyde dehydrogenase 1                            | -5.67 |
| Mtr.40897.1.S1_at   | Hypothetical protein                                      | -5.67 |
| Mtr.48097.1.S1_at   | Hypothetical protein                                      | -5.67 |
| Mtr.13053.1.S1_at   | Uroporphyrin III methylase                                | -5.65 |
| Msa.1083.1.S1_at    | Hypothetical protein                                      | -5.64 |
| Mtr.8478.1.S1_at    | Cytochrome P450                                           | -5.63 |
| Mtr.38047.1.S1_at   | Monogalactosyldiacylglycerol synthase                     | -5.63 |
| Mtr.29983.1.S1_s_at | Beta-carotene hydroxylase                                 | -5.62 |
| Mtr.11489.1.S1_at   | RedA protein                                              | -5.62 |
| Mtr.44607.1.S1_at   | Proline-5-carboxylate synthetase                          | -5.62 |

|                     |                                              |       |
|---------------------|----------------------------------------------|-------|
| Mtr.51862.1.S1_at   | Hypothetical protein                         | -5.61 |
| Mtr.31764.1.S1_at   | Alpha-mannosidase                            | -5.60 |
| Mtr.31300.1.S1_at   | Disease resistance response protein          | -5.60 |
| Mtr.12447.1.S1_at   | Proline transport protein                    | -5.60 |
| Mtr.4424.1.S1_at    | Hypothetical protein                         | -5.60 |
| Mtr.11363.1.S1_at   | Glycosyltransferase                          | -5.60 |
| Msa.1866.1.S1_x_at  | Hypothetical protein                         | -5.60 |
| Mtr.6980.1.S1_at    | Multidrug resistance-associated protein 2    | -5.60 |
| Mtr.41896.1.S1_s_at | Hypothetical protein                         | -5.59 |
| Mtr.37982.1.S1_at   | Twist related protein 1                      | -5.59 |
| Mtr.41829.1.S1_at   | Hypothetical protein                         | -5.59 |
| Mtr.33664.1.S1_at   | Ferredoxin-dependent glutamate synthase      | -5.58 |
| Mtr.20947.1.S1_x_at | Serine/threonine protein kinase              | -5.58 |
| Mtr.18153.1.S1_at   | Hypothetical protein                         | -5.58 |
| Mtr.20560.1.S1_at   | Purple acid phosphatase                      | -5.57 |
| Mtr.40508.1.S1_at   | Magnesium-chelatase subunit chlI             | -5.57 |
| Mtr.32495.1.S1_at   | Protein kinase                               | -5.57 |
| Mtr.15775.1.S1_at   | Glycoside hydrolase                          | -5.56 |
| Msa.2997.1.S1_at    | Hypothetical protein                         | -5.56 |
| Mtr.27754.1.S1_at   | Hypothetical protein                         | -5.56 |
| Mtr.32386.1.S1_at   | Strubbelig receptor                          | -5.56 |
| Mtr.9529.1.S1_at    | Hypothetical protein                         | -5.56 |
| Mtr.13614.1.S1_at   | Pyrimidine 5'-nucleotidase                   | -5.55 |
| Mtr.14230.1.S1_at   | Hypothetical protein                         | -5.54 |
| Mtr.5847.1.S1_at    | Zinc finger protein                          | -5.53 |
| Mtr.15418.1.S1_at   | Histone deacetylase                          | -5.53 |
| Mtr.8416.1.S1_s_at  | Cytochrome b                                 | -5.53 |
| Mtr.5115.1.S1_s_at  | Hypothetical protein                         | -5.53 |
| Mtr.40775.1.S1_at   | Tyrosine phosphatase                         | -5.52 |
| Mtr.38697.1.S1_at   | Plant viral-response family protein          | -5.52 |
| Mtr.10814.1.S1_at   | Epoxide hydrolase                            | -5.52 |
| Mtr.9586.1.S1_at    | Hypothetical protein                         | -5.52 |
| Mtr.44730.1.S1_at   | Nitrate transporter                          | -5.52 |
| Mtr.42840.1.S1_at   | Germin-like protein                          | -5.52 |
| Mtr.17357.1.S1_at   | Hypothetical protein                         | -5.51 |
| Mtr.11222.1.S1_at   | Hypothetical protein                         | -5.51 |
| Mtr.33475.1.S1_s_at | Proline-rich protein                         | -5.49 |
| Mtr.33440.1.S1_at   | 30S ribosomal protein S16                    | -5.49 |
| Mtr.28675.1.S1_s_at | Polygalacturonase                            | -5.49 |
| Mtr.38254.1.S1_at   | Ubiquitin-conjugating enzyme                 | -5.49 |
| Mtr.37882.1.S1_at   | Nucleotide pyrophosphatase/phosphodiesterase | -5.48 |
| Mtr.40230.1.S1_at   | Photosystem I reaction center subunit V      | -5.48 |
| Mtr.43622.1.S1_s_at | NADH dehydrogenase                           | -5.48 |
| Mtr.1621.1.S1_s_at  | Hypothetical protein                         | -5.47 |
| Mtr.34189.1.S1_at   | Hypothetical protein                         | -5.47 |
| Mtr.9853.1.S1_at    | Hypothetical protein                         | -5.47 |
| Mtr.25389.1.S1_at   | Vestitone reductase                          | -5.46 |
| Mtr.43459.1.S1_at   | Hypothetical protein                         | -5.46 |
| Mtr.44783.1.S1_at   | Hypothetical protein                         | -5.46 |
| Mtr.5795.1.S1_at    | Hypothetical protein                         | -5.46 |
| Mtr.2343.1.S1_at    | Hypothetical protein                         | -5.46 |
| Mtr.43923.1.S1_at   | Calcium-transporting ATPase 9                | -5.45 |
| Mtr.25344.1.S1_at   | Hypothetical protein                         | -5.45 |
| Mtr.15345.1.S1_at   | Multi antimicrobial extrusion protein        | -5.45 |

|                     |                                                   |       |
|---------------------|---------------------------------------------------|-------|
| Mtr.43771.1.S1_at   | Hypothetical protein                              | -5.44 |
| Mtr.38263.1.S1_at   | Hypothetical protein                              | -5.44 |
| Mtr.41079.1.S1_at   | NADH dehydrogenase                                | -5.44 |
| Mtr.11929.1.S1_at   | Beta-1,4-xylosidase                               | -5.43 |
| Msa.1921.1.S1_at    | Hypothetical protein                              | -5.43 |
| Mtr.40744.1.S1_at   | Hypothetical protein                              | -5.43 |
| Mtr.13813.1.S1_s_at | Alkaline/neutral invertase                        | -5.42 |
| Mtr.37436.1.S1_at   | Hypersensitive-induced response protein           | -5.42 |
| Mtr.31160.1.S1_at   | En/Spm-like transposon protein                    | -5.42 |
| Mtr.8754.1.S1_at    | Rhodanese-like family protein                     | -5.41 |
| Mtr.38447.1.S1_at   | Cell Wall Invertase Inhibitor                     | -5.41 |
| Mtr.929.1.S1_at     | Hypothetical protein                              | -5.41 |
| Mtr.27397.1.S1_at   | Hypothetical protein                              | -5.40 |
| Mtr.10605.1.S1_at   | Hypothetical protein                              | -5.40 |
| Mtr.12922.1.S1_at   | Hypothetical protein                              | -5.40 |
| Mtr.40249.1.S1_at   | ATP synthase delta chain                          | -5.40 |
| Mtr.38054.1.S1_at   | Hypothetical protein                              | -5.39 |
| Mtr.13612.1.S1_at   | Hypothetical protein                              | -5.39 |
| Msa.1928.1.S1_at    | Hypothetical protein                              | -5.39 |
| Mtr.1617.1.S1_s_at  | Basic blue copper protein                         | -5.38 |
| Mtr.43681.1.S1_at   | CYP1                                              | -5.37 |
| Mtr.4126.1.S1_at    | Laccase                                           | -5.36 |
| Mtr.41835.1.S1_at   | Hypothetical protein                              | -5.36 |
| Mtr.31727.1.S1_at   | Hypothetical protein                              | -5.35 |
| Mtr.12886.1.S1_at   | Hypothetical protein                              | -5.34 |
| Mtr.13388.1.S1_s_at | Hypothetical protein                              | -5.34 |
| Mtr.38481.1.S1_at   | Hypothetical protein                              | -5.34 |
| Msa.1574.1.S1_at    | Hypothetical protein                              | -5.33 |
| Mtr.27146.1.S1_s_at | Cyclin-like protein                               | -5.33 |
| Msa.2909.1.S1_at    | Hypothetical protein                              | -5.33 |
| Mtr.19280.1.S1_at   | Multi antimicrobial extrusion protein             | -5.33 |
| Mtr.9891.1.S1_at    | Hypothetical protein                              | -5.33 |
| Mtr.25786.1.S1_at   | Hypothetical protein                              | -5.32 |
| Msa.1209.1.S1_at    | Hypothetical protein                              | -5.32 |
| Mtr.32796.1.S1_at   | Sodium transport protein                          | -5.32 |
| Mtr.37806.1.S1_at   | Cellulose synthase                                | -5.32 |
| Mtr.7062.1.S1_at    | Hypothetical protein                              | -5.30 |
| Mtr.8981.1.S1_at    | Hypothetical protein                              | -5.30 |
| Mtr.8575.1.S1_x_at  | Glucosyltransferase-13                            | -5.29 |
| Mtr.44825.1.S1_at   | POZ domain protein                                | -5.29 |
| Mtr.32634.1.S1_s_at | Heat shock protein                                | -5.28 |
| Mtr.13969.1.S1_at   | Glucosyltransferase                               | -5.28 |
| Mtr.11645.1.S1_at   | Methionine aminopeptidase                         | -5.27 |
| Mtr.1431.1.S1_at    | Hypothetical protein                              | -5.27 |
| Mtr.39502.1.S1_at   | Hypothetical protein                              | -5.27 |
| Mtr.22606.1.S1_at   | Pentatricopeptide (PPR) repeat-containing protein | -5.27 |
| Mtr.14192.1.S1_at   | Inositol monophosphatase                          | -5.27 |
| Msa.2613.1.S1_at    | Hypothetical protein                              | -5.27 |
| Mtr.31331.1.S1_s_at | Hypothetical protein                              | -5.26 |
| Mtr.35779.1.S1_at   | Seed maturation protein                           | -5.26 |
| Mtr.32040.1.S1_at   | Hypothetical protein                              | -5.26 |
| Mtr.16356.1.S1_s_at | Phospholipid/glycerol acyltransferase             | -5.26 |
| Mtr.38390.1.S1_at   | Hypothetical protein                              | -5.25 |
| Mtr.18797.1.S1_at   | Proteinase inhibitor I3                           | -5.25 |

|                     |                                        |       |
|---------------------|----------------------------------------|-------|
| Mtr.29383.1.S1_at   | Hypothetical protein                   | -5.24 |
| Mtr.11798.1.S1_at   | Cellulose synthase                     | -5.24 |
| Msa.1890.1.S1_at    | Hypothetical protein                   | -5.23 |
| Mtr.18703.1.S1_at   | Serine/threonine protein kinase        | -5.22 |
| Mtr.40561.1.S1_at   | Hypothetical protein                   | -5.22 |
| Mtr.38245.1.S1_at   | Transcription factor RAU1              | -5.22 |
| Mtr.12143.1.S1_at   | Hypothetical protein                   | -5.22 |
| Mtr.37688.1.S1_at   | NtPRp27-like protein                   | -5.21 |
| Mtr.30695.1.S1_at   | Hypothetical protein                   | -5.21 |
| Mtr.33840.1.S1_at   | Hypothetical protein                   | -5.21 |
| Mtr.44855.1.S1_at   | Urophorphyrin III methylase            | -5.21 |
| Mtr.7101.1.S1_at    | C2H2 zinc-finger protein               | -5.21 |
| Mtr.50278.1.S1_at   | Small GTP-binding protein              | -5.20 |
| Mtr.38455.1.S1_at   | Hypothetical protein                   | -5.20 |
| Mtr.35540.1.S1_at   | Hypothetical protein                   | -5.19 |
| Mtr.10800.1.S1_s_at | Hypothetical protein                   | -5.19 |
| Mtr.44860.1.S1_at   | MADS5 protein                          | -5.19 |
| Msa.2839.1.S1_at    | Hypothetical protein                   | -5.18 |
| Mtr.35557.1.S1_s_at | Hypothetical protein                   | -5.17 |
| Mtr.28757.1.S1_at   | Hypothetical protein                   | -5.17 |
| Mtr.4792.1.S1_at    | Leaf ubiquitous urease                 | -5.16 |
| Mtr.15024.1.S1_at   | Hypothetical protein                   | -5.16 |
| Mtr.14157.1.S1_at   | Gibberellin regulated protein          | -5.16 |
| Mtr.8420.1.S1_at    | Hypothetical protein                   | -5.16 |
| Mtr.37448.1.S1_at   | Photosystem II                         | -5.16 |
| Mtr.41539.1.S1_at   | Hypothetical protein                   | -5.16 |
| Mtr.27915.1.S1_at   | Hypothetical protein                   | -5.15 |
| Mtr.31928.1.S1_at   | Peroxidase 25                          | -5.15 |
| Msa.2814.1.S1_at    | Hypothetical protein                   | -5.14 |
| Mtr.34376.1.S1_at   | Hypothetical protein                   | -5.14 |
| Mtr.9427.1.S1_at    | Hypothetical protein                   | -5.14 |
| Mtr.41215.1.S1_at   | Germin-like protein                    | -5.14 |
| Mtr.49776.1.S1_x_at | Auxin responsive SAUR                  | -5.14 |
| Mtr.40565.1.S1_at   | GTP-binding protein LepA               | -5.14 |
| Mtr.32399.1.S1_at   | Hypothetical protein                   | -5.13 |
| Mtr.18486.1.S1_at   | Chlorophyll A-B binding protein        | -5.13 |
| Mtr.32044.1.S1_at   | Hypothetical protein                   | -5.12 |
| Mtr.33655.1.S1_at   | CYP71A10                               | -5.12 |
| Mtr.50907.1.S1_at   | Glycoside hydrolase                    | -5.11 |
| Mtr.27855.1.S1_at   | Heat shock protein                     | -5.11 |
| Mtr.36941.1.S1_at   | Hypothetical protein                   | -5.10 |
| Msa.1658.1.S1_at    | Hypothetical protein                   | -5.10 |
| Mtr.24601.1.S1_at   | Receptor-related protein kinase        | -5.10 |
| Msa.1380.1.S1_at    | Hypothetical protein                   | -5.09 |
| Mtr.40444.1.S1_at   | Hypothetical protein                   | -5.09 |
| Mtr.12904.1.S1_at   | Pectinacetylsterase                    | -5.08 |
| Mtr.15246.1.S1_at   | ABC transporter                        | -5.08 |
| Mtr.12989.1.S1_at   | Fructosamine-3-kinase                  | -5.08 |
| Mtr.37361.1.S1_at   | Chlorophyll a-b binding protein CP29.3 | -5.08 |
| Mtr.9810.1.S1_at    | Hypothetical protein                   | -5.08 |
| Mtr.36338.1.S1_at   | Hypothetical protein                   | -5.07 |
| Mtr.5489.1.S1_at    | Hypothetical protein                   | -5.07 |
| Mtr.44737.1.S1_at   | Hypothetical protein                   | -5.07 |
| Mtr.6148.1.S1_x_at  | Serine carboxypeptidase II-2           | -5.06 |

|                     |                                                    |       |
|---------------------|----------------------------------------------------|-------|
| Mtr.49448.1.S1_at   | Glycoside hydrolase                                | -5.06 |
| Mtr.37642.1.S1_at   | NADP-dependent oxidoreductase P2                   | -5.06 |
| Mtr.15949.1.S1_at   | Hypothetical protein                               | -5.06 |
| Mtr.6532.1.S1_s_at  | 3-ketoacyl-ACP synthase                            | -5.06 |
| Mtr.28938.1.S1_at   | Hypothetical protein                               | -5.06 |
| Mtr.25447.1.S1_at   | Hypothetical protein                               | -5.05 |
| Mtr.12572.1.S1_at   | Hypothetical protein                               | -5.05 |
| Mtr.10567.1.S1_s_at | Hypothetical protein                               | -5.04 |
| Mtr.8993.1.S1_at    | Hypothetical protein                               | -5.04 |
| Mtr.37192.1.S1_at   | Hypothetical protein                               | -5.04 |
| Mtr.23551.1.S1_at   | Late embryogenesis abundant protein D-34           | -5.04 |
| Mtr.17195.1.S1_at   | RNA-binding region RNP-1                           | -5.04 |
| Mtr.50015.1.S1_at   | Hypothetical protein                               | -5.04 |
| Mtr.41900.1.S1_at   | Hypothetical protein                               | -5.03 |
| Mtr.51598.1.S1_at   | NUDIX hydrolase                                    | -5.03 |
| Mtr.34765.1.S1_at   | Hypothetical protein                               | -5.03 |
| Mtr.9540.1.S1_at    | RING finger                                        | -5.03 |
| Mtr.40908.1.S1_at   | Ribosomal protein L6                               | -5.02 |
| Mtr.32540.1.S1_at   | Hypothetical protein                               | -5.02 |
| Mtr.37681.1.S1_s_at | Hypothetical protein                               | -5.02 |
| Mtr.32821.1.S1_at   | Hypothetical protein                               | -5.02 |
| Msa.3056.1.S1_at    | Hypothetical protein                               | -5.01 |
| Mtr.45264.1.S1_at   | Hypothetical protein                               | -5.01 |
| Mtr.33045.1.S1_at   | Hypothetical protein                               | -5.01 |
| Mtr.37517.1.S1_at   | Basic blue protein                                 | -4.99 |
| Mtr.40184.1.S1_at   | FtsH protease (VAR2)                               | -4.99 |
| Mtr.38468.1.S1_at   | Proline-rich protein                               | -4.99 |
| Mtr.17550.1.S1_at   | Plant lipid transfer protein                       | -4.99 |
| Mtr.44455.1.S1_at   | Hypothetical protein                               | -4.98 |
| Mtr.44897.1.S1_at   | Hypothetical protein                               | -4.98 |
| Mtr.5646.1.S1_at    | Glutathione S-transferase                          | -4.97 |
| Mtr.47127.1.S1_at   | Far-red impaired response protein                  | -4.97 |
| Mtr.16200.1.S1_at   | Esterase/lipase/thioesterase                       | -4.97 |
| Mtr.45183.1.S1_at   | Hypothetical protein                               | -4.95 |
| Msa.2747.1.S1_at    | Hypothetical protein                               | -4.94 |
| Mtr.23616.1.S1_at   | DNA-binding protein                                | -4.94 |
| Mtr.42933.1.S1_s_at | Nonspecific lipid-transfer protein precursor (LTP) | -4.94 |
| Mtr.12880.1.S1_at   | Serine/threonine protein kinase                    | -4.93 |
| Mtr.34711.1.S1_at   | C-type cytochrome biogenesis protein Ccs1          | -4.93 |
| Mtr.13309.1.S1_at   | Hypothetical protein                               | -4.93 |
| Mtr.38453.1.S1_at   | Proline-rich protein                               | -4.93 |
| Mtr.38021.1.S1_at   | Hypothetical protein                               | -4.92 |
| Mtr.24898.1.S1_at   | Magnesium/proton exchanger                         | -4.92 |
| Mtr.32928.1.S1_s_at | Hypothetical protein                               | -4.92 |
| Mtr.6093.1.S1_s_at  | Subtilisin-like protease                           | -4.92 |
| Mtr.46514.1.S1_x_at | Alpha/beta-amyrin synthase                         | -4.92 |
| Mtr.40332.1.S1_at   | 5,10-methylenetetrahydrofolate dehydrogenase       | -4.91 |
| Mtr.18220.1.S1_s_at | Hypothetical protein                               | -4.91 |
| Mtr.44805.1.S1_at   | Hypothetical protein                               | -4.91 |
| Mtr.17452.1.S1_at   | Glycoside transferase                              | -4.91 |
| Mtr.14245.1.S1_at   | Hypothetical protein                               | -4.91 |
| Mtr.18022.1.S1_at   | Hypothetical protein                               | -4.90 |
| Mtr.45276.1.S1_at   | LIM domain containing protein                      | -4.90 |
| Mtr.34829.1.S1_at   | Hypothetical protein                               | -4.90 |

|                     |                                                       |       |
|---------------------|-------------------------------------------------------|-------|
| Mtr.21855.1.S1_at   | Hypothetical protein                                  | -4.90 |
| Mtr.42899.1.S1_a_at | Carboxylesterase                                      | -4.89 |
| Mtr.39210.1.S1_at   | Hypothetical protein                                  | -4.89 |
| Mtr.24083.1.S1_at   | Uroporphyrinogen decarboxylase                        | -4.89 |
| Mtr.33770.1.S1_at   | Hypothetical protein                                  | -4.88 |
| Mtr.12907.1.S1_at   | Hypothetical protein                                  | -4.88 |
| Mtr.51302.1.S1_at   | Ras small GTPase                                      | -4.88 |
| Mtr.38595.1.S1_at   | Hypothetical protein                                  | -4.88 |
| Mtr.2090.1.S1_at    | Cation transport ATPase                               | -4.88 |
| Mtr.34734.1.S1_at   | Potassium transporter 2                               | -4.87 |
| Mtr.50716.1.S1_s_at | Glycosyl transferase                                  | -4.87 |
| Mtr.50857.1.S1_at   | Peptidase S10                                         | -4.87 |
| Mtr.43323.1.S1_at   | Polygalacturonase-like protein                        | -4.87 |
| Mtr.38114.1.S1_at   | Thioredoxin M-type 4                                  | -4.87 |
| Mtr.12848.1.S1_at   | Berberine bridge enzyme-like protein                  | -4.87 |
| Mtr.32711.1.S1_at   | Hypothetical protein                                  | -4.87 |
| Mtr.994.1.S1_at     | Hypothetical protein                                  | -4.86 |
| Mtr.21060.1.S1_at   | Peptidyl-prolyl cis-trans isomerase, cyclophilin type | -4.86 |
| Mtr.43551.1.S1_at   | Allyl alcohol dehydrogenase                           | -4.85 |
| Mtr.33116.1.S1_at   | Receptor protein kinase                               | -4.85 |
| Mtr.7095.1.S1_at    | Na <sup>+</sup> /H <sup>+</sup> antiporter NHX6       | -4.85 |
| Mtr.26278.1.S1_s_at | Pyrroline-5-carboxylate reductase                     | -4.85 |
| Mtr.28730.1.S1_at   | En/Spm-like transposon protein                        | -4.84 |
| Mtr.42457.1.S1_at   | Hypothetical protein                                  | -4.84 |
| Mtr.28324.1.S1_at   | Hypothetical protein                                  | -4.84 |
| Mtr.42933.1.S1_x_at | Nonspecific lipid-transfer protein precursor (LTP)    | -4.84 |
| Mtr.27107.1.S1_at   | MYC1                                                  | -4.84 |
| Mtr.8609.1.S1_at    | Photosystem II reaction center                        | -4.83 |
| Mtr.34447.1.S1_at   | Hypothetical protein                                  | -4.83 |
| Mtr.37387.1.S1_s_at | Inhibitor of apoptosis-like protein                   | -4.83 |
| Mtr.33127.1.S1_at   | Hypothetical protein                                  | -4.83 |
| Mtr.45322.1.S1_at   | Hypothetical protein                                  | -4.82 |
| Mtr.31359.1.S1_at   | Hypothetical protein                                  | -4.82 |
| Mtr.11554.1.S1_at   | Alpha-amylase                                         | -4.82 |
| Mtr.20268.1.S1_at   | Hypothetical protein                                  | -4.82 |
| Mtr.44100.1.S1_at   | Hypothetical protein                                  | -4.82 |
| Mtr.31115.1.S1_at   | Hypothetical protein                                  | -4.82 |
| Msa.2646.1.S1_at    | Hypothetical protein                                  | -4.81 |
| Mtr.24815.1.S1_at   | Glutaredoxin protein                                  | -4.81 |
| Mtr.8504.1.S1_at    | Hypothetical protein                                  | -4.81 |
| Mtr.41127.1.S1_at   | Pherophorin                                           | -4.81 |
| Mtr.24829.1.S1_at   | Hypothetical protein                                  | -4.80 |
| Mtr.9072.1.S1_at    | Acyltransferase                                       | -4.80 |
| Mtr.14419.1.S1_s_at | Purple acid phosphatase                               | -4.80 |
| Mtr.27207.1.S1_s_at | Hypothetical protein                                  | -4.80 |
| Mtr.12724.1.S1_at   | PDI-like protein                                      | -4.80 |
| Mtr.41992.1.S1_at   | Endo-beta-N-acetylglucosaminidase                     | -4.80 |
| Mtr.5274.1.S1_s_at  | Cellulose synthase                                    | -4.79 |
| Mtr.52072.1.S1_at   | Hypothetical protein                                  | -4.79 |
| Mtr.44552.1.S1_at   | Hypothetical protein                                  | -4.79 |
| Mtr.8435.1.S1_at    | Lipoxygenase                                          | -4.79 |
| Mtr.27854.1.S1_s_at | NADP-dependent oxidoreductase P1                      | -4.79 |
| Mtr.44578.1.S1_at   | RAB1X                                                 | -4.78 |
| Mtr.44600.1.S1_at   | Hypothetical protein                                  | -4.78 |



|                     |                                             |       |
|---------------------|---------------------------------------------|-------|
| Mtr.10293.1.S1_at   | Alanyl-tRNA synthetase                      | -4.77 |
| Mtr.43506.1.S1_at   | Hypothetical protein                        | -4.77 |
| Mtr.44395.1.S1_at   | Hypothetical protein                        | -4.77 |
| Mtr.6724.1.S1_at    | Hypothetical protein                        | -4.77 |
| Mtr.13288.1.S1_at   | ADP-glucose pyrophosphorylase large subunit | -4.76 |
| Mtr.5792.1.S1_at    | Hypothetical protein                        | -4.76 |
| Mtr.37342.1.S1_at   | Mannitol dehydrogenase                      | -4.76 |
| Mtr.34540.1.S1_s_at | Hypothetical protein                        | -4.76 |
| Mtr.39373.1.S1_at   | Alanyl-tRNA synthetase                      | -4.75 |
| Mtr.42357.1.S1_at   | Hypothetical protein                        | -4.75 |
| Mtr.12774.1.S1_s_at | Bg55 protein                                | -4.75 |
| Mtr.28309.1.S1_at   | Acyl-CoA thioesterase                       | -4.75 |
| Mtr.50826.1.S1_at   | Beta-ketoacyl synthase                      | -4.74 |
| Mtr.9717.1.S1_at    | WAK-like kinase                             | -4.73 |
| Mtr.29094.1.S1_s_at | Hypothetical protein                        | -4.73 |
| Mtr.5882.1.S1_at    | Hypothetical protein                        | -4.73 |
| Msa.1391.1.S1_at    | Hypothetical protein                        | -4.73 |
| Mtr.34614.1.S1_at   | Hypothetical protein                        | -4.73 |
| Mtr.16895.1.S1_at   | Hypothetical protein                        | -4.72 |
| Mtr.10347.1.S1_at   | Receptor-like protein kinase                | -4.72 |
| Mtr.33436.1.S1_at   | Hypothetical protein                        | -4.72 |
| Mtr.13198.1.S1_at   | PHAP2B protein                              | -4.72 |
| Mtr.43806.1.S1_at   | Hypothetical protein                        | -4.72 |
| Mtr.34714.1.S1_at   | Cyclin-dependent kinase 3                   | -4.71 |
| Mtr.19940.1.S1_at   | Hypothetical protein                        | -4.71 |
| Mtr.10198.1.S1_at   | Phosphoenolpyruvate carboxylase             | -4.71 |
| Mtr.50974.1.S1_at   | Hypothetical protein                        | -4.71 |
| Mtr.4037.1.S1_at    | Hypothetical protein                        | -4.70 |
| Mtr.40774.1.S1_s_at | Tyrosine phosphatase                        | -4.70 |
| Mtr.8790.1.S1_at    | Peripheral-type benzodiazepine receptor     | -4.69 |
| Mtr.40121.1.S1_at   | Peroxidase1C                                | -4.69 |
| Mtr.40723.1.S1_at   | Hypothetical protein                        | -4.69 |
| Mtr.35108.1.S1_at   | NAP                                         | -4.69 |
| Mtr.40534.1.S1_at   | Sulfate transporter protein                 | -4.69 |
| Mtr.12418.1.S1_at   | Hypothetical protein                        | -4.68 |
| Mtr.44321.1.S1_at   | Hypothetical protein                        | -4.68 |
| Mtr.29279.1.S1_at   | Lipoxygenase                                | -4.68 |
| Mtr.8859.1.S1_at    | Proline rich protein                        | -4.68 |
| Mtr.11440.1.S1_at   | Thylakoid lumenal 21.5 kDa protein          | -4.67 |
| Msa.1818.1.S1_at    | Hypothetical protein                        | -4.67 |
| Msa.1114.1.S1_at    | Hypothetical protein                        | -4.67 |
| Mtr.34452.1.S1_at   | Hypothetical protein                        | -4.67 |
| Mtr.9495.1.S1_at    | Sugar transporter-like protein              | -4.67 |
| Mtr.35849.1.S1_at   | Hypothetical protein                        | -4.67 |
| Mtr.34640.1.S1_at   | Hypothetical protein                        | -4.66 |
| Mtr.1715.1.S1_at    | Aminoalcoholphosphotransferase              | -4.66 |
| Mtr.26672.1.S1_s_at | Hypothetical protein                        | -4.65 |
| Mtr.41274.1.S1_at   | Hypothetical protein                        | -4.64 |
| Mtr.6731.1.S1_at    | PSII D1 protein processing enzyme           | -4.64 |
| Mtr.38321.1.S1_at   | Transfactor-like protein                    | -4.64 |
| AFFX-Mtr-gsta-5_at  | 2,4-D inducible glutathione S-transferase   | -4.64 |
| Mtr.5745.1.S1_at    | Receptor-like protein kinase                | -4.64 |
| Mtr.16200.1.S1_x_at | Esterase/lipase/thioesterase                | -4.64 |
| Mtr.44721.1.S1_at   | Rust resistance kinase                      | -4.63 |

|                     |                                            |       |
|---------------------|--------------------------------------------|-------|
| Mtr.10882.1.S1_at   | Hypothetical protein                       | -4.62 |
| Mtr.42374.1.S1_at   | Hypothetical protein                       | -4.62 |
| Mtr.32709.1.S1_at   | Hypothetical protein                       | -4.62 |
| Mtr.37602.1.S1_at   | Proline-rich protein                       | -4.62 |
| Mtr.37299.1.S1_at   | Hypothetical protein                       | -4.61 |
| Mtr.6322.1.S1_s_at  | Cytochrome P450                            | -4.61 |
| Mtr.13786.1.S1_at   | Hypothetical protein                       | -4.61 |
| Mtr.22750.1.S1_at   | Hypothetical protein                       | -4.61 |
| Mtr.19517.1.S1_at   | Ribulose biphosphate carboxylase           | -4.61 |
| Mtr.39315.1.S1_s_at | Hypothetical protein                       | -4.60 |
| Mtr.51909.1.S1_at   | Phenylalanine/histidine ammonia-lyase      | -4.59 |
| Mtr.13472.1.S1_at   | Interleukin-1 receptor-associated kinase-3 | -4.59 |
| Mtr.38647.1.S1_at   | WAK-like kinase                            | -4.59 |
| Mtr.22791.1.S1_at   | UDP-glucose pyrophosphorylase              | -4.59 |
| Mtr.35618.1.S1_at   | Multi resistance protein                   | -4.58 |
| Mtr.12931.1.S1_at   | Hypothetical protein                       | -4.58 |
| Mtr.22414.1.S1_s_at | Hypothetical protein                       | -4.58 |
| Mtr.4818.1.S1_s_at  | Gluthamine synthetase                      | -4.58 |
| Mtr.43042.1.S1_at   | LEDI-5c protein                            | -4.57 |
| Mtr.15494.1.S1_at   | Cinnamyl alcohol dehydrogenase             | -4.57 |
| Mtr.41489.1.S1_at   | Hypothetical protein                       | -4.57 |
| Mtr.34709.1.S1_at   | Ser-thr protein kinase                     | -4.57 |
| Mtr.42095.1.S1_at   | Receptor like protein                      | -4.57 |
| Mtr.8212.1.S1_at    | Protein kinase                             | -4.57 |
| Msa.1877.1.S1_at    | Hypothetical protein                       | -4.57 |
| Mtr.13167.1.S1_at   | Acyl CoA synthetase                        | -4.57 |
| Mtr.37311.1.S1_at   | Chlorophyll a/b-binding protein type I     | -4.57 |
| Mtr.31555.1.S1_at   | Beta-1,3-glucanase                         | -4.57 |
| Mtr.5962.1.S1_s_at  | Nonspecific lipid-transfer protein         | -4.56 |
| Mtr.31155.1.S1_at   | Hypothetical protein                       | -4.56 |
| Msa.1022.1.S1_at    | Hypothetical protein                       | -4.56 |
| Mtr.24912.1.S1_at   | Hypothetical protein                       | -4.56 |
| Mtr.27682.1.S1_at   | NS5 protein                                | -4.55 |
| Mtr.713.1.S1_s_at   | Nucleotide pyrophosphatase                 | -4.55 |
| Mtr.40668.1.S1_at   | Hypothetical protein                       | -4.55 |
| Mtr.35857.1.S1_at   | Hypothetical protein                       | -4.55 |
| Mtr.39989.1.S1_at   | Proteinase IV                              | -4.55 |
| Mtr.6658.1.S1_at    | Auxin-induced protein                      | -4.55 |
| Mtr.39482.1.S1_at   | Hypothetical protein                       | -4.54 |
| Mtr.13421.1.S1_at   | Cytochrome b-561                           | -4.54 |
| Mtr.50308.1.S1_at   | Hypothetical protein                       | -4.54 |
| Mtr.50307.1.S1_at   | Haloacid dehalogenase-like hydrolase       | -4.54 |
| Mtr.31565.1.S1_s_at | Hypothetical protein                       | -4.53 |
| Mtr.41288.1.S1_at   | Hypothetical protein                       | -4.53 |
| Mtr.25043.1.S1_at   | Hypothetical protein                       | -4.52 |
| Mtr.8496.1.S1_at    | Hypothetical protein                       | -4.52 |
| Mtr.45389.1.S1_at   | Hypothetical protein                       | -4.51 |
| Mtr.42104.1.S1_at   | Heterotrimeric G-protein gamma subunit 2   | -4.51 |
| Mtr.40027.1.S1_at   | CBL-interacting protein kinase             | -4.51 |
| Mtr.8858.1.S1_at    | Biogenesis protein                         | -4.51 |
| Mtr.35867.1.S1_at   | Hypothetical protein                       | -4.51 |
| Mtr.37563.1.S1_at   | Outer envelope membrane protein            | -4.51 |
| Mtr.44590.1.S1_s_at | Glycuronosyltransferase                    | -4.50 |
| Mtr.29095.1.S1_at   | Respiratory burst oxidase homolog          | -4.50 |

|                     |                                                           |       |
|---------------------|-----------------------------------------------------------|-------|
| Mtr.28777.1.S1_at   | Hypothetical protein                                      | -4.50 |
| Msa.579.1.S1_at     | Hypothetical protein                                      | -4.50 |
| Mtr.8501.1.S1_s_at  | Glycolate oxidase                                         | -4.50 |
| Mtr.33506.1.S1_at   | Hypothetical protein                                      | -4.50 |
| Mtr.8925.1.S1_s_at  | Signal recognition particle 54 kDa subunit                | -4.50 |
| Mtr.11999.1.S1_at   | Hypothetical protein                                      | -4.49 |
| Mtr.25990.1.S1_at   | Hypothetical protein                                      | -4.49 |
| Mtr.38367.1.S1_at   | Hypothetical protein                                      | -4.49 |
| Mtr.45269.1.S1_at   | NADP dependent malic enzyme                               | -4.49 |
| Mtr.20299.1.S1_at   | U box protein                                             | -4.49 |
| Mtr.37015.1.S1_at   | Hydroxymethylglutaryl-CoA lyase                           | -4.48 |
| Mtr.8824.1.S1_at    | CONSTANS-like protein 2                                   | -4.48 |
| Mtr.51973.1.S1_at   | Seed maturation protein                                   | -4.48 |
| Mtr.28632.1.S1_at   | Hypothetical protein                                      | -4.48 |
| Mtr.6008.1.S1_at    | Hypothetical protein                                      | -4.48 |
| Mtr.40550.1.S1_at   | Hypothetical protein                                      | -4.47 |
| Mtr.38746.1.S1_at   | Heat shock transcription factor                           | -4.47 |
| Mtr.46876.1.S1_at   | Hypothetical protein                                      | -4.47 |
| Mtr.9679.1.S1_at    | Thioredoxin 3                                             | -4.47 |
| Mtr.52127.1.S1_at   | 2OG-Fe(II) oxygenase                                      | -4.47 |
| Mtr.38138.1.S1_at   | Hypothetical protein                                      | -4.47 |
| Mtr.1427.1.S1_at    | Hypothetical protein                                      | -4.46 |
| Mtr.13972.1.S1_at   | Thioredoxin m                                             | -4.46 |
| Msa.2749.1.S1_at    | Hypothetical protein                                      | -4.45 |
| Mtr.40684.1.S1_at   | Anthocyanin 5-aromatic acyltransferase/benzoyltransferase | -4.45 |
| Mtr.10656.1.S1_at   | Sucrose-phosphate synthase                                | -4.45 |
| Mtr.32848.1.S1_at   | Hypothetical protein                                      | -4.45 |
| Mtr.19577.1.S1_s_at | Aldehyde decarboxylase                                    | -4.45 |
| Mtr.9501.1.S1_at    | Lysine decarboxylase                                      | -4.44 |
| Mtr.20207.1.S1_at   | Thioredoxin                                               | -4.44 |
| Msa.1725.1.S1_at    | Hypothetical protein                                      | -4.44 |
| Mtr.34453.1.S1_at   | 1-aminocyclopropane-1-carboxylate synthase                | -4.44 |
| Mtr.3869.1.S1_at    | Hypothetical protein                                      | -4.44 |
| Msa.3191.1.S1_s_at  | Hypothetical protein                                      | -4.44 |
| Mtr.43269.1.S1_at   | 30S ribosomal protein S1                                  | -4.44 |
| Mtr.32057.1.S1_at   | Hypothetical protein                                      | -4.43 |
| Mtr.48712.1.S1_s_at | Facilitated glucose transporter                           | -4.43 |
| Mtr.41066.1.S1_at   | Hypothetical protein                                      | -4.43 |
| Mtr.2062.1.S1_at    | Hypothetical protein                                      | -4.43 |
| Mtr.10212.1.S1_at   | Hypothetical protein                                      | -4.43 |
| Mtr.38223.1.S1_at   | Acyltransferase                                           | -4.42 |
| Mtr.29529.1.S1_at   | Hypothetical protein                                      | -4.42 |
| Mtr.13184.1.S1_at   | Prolyl carboxypeptidase like protein                      | -4.42 |
| Mtr.5954.1.S1_at    | ABC transporter                                           | -4.42 |
| Mtr.33686.1.S1_at   | Hypothetical protein                                      | -4.42 |
| Mtr.10936.1.S1_at   | Transcriptional regulator, LysR family                    | -4.42 |
| Mtr.50527.1.S1_at   | Hypothetical protein                                      | -4.41 |
| Mtr.49348.1.S1_s_at | Proteinase inhibitor I25                                  | -4.41 |
| Mtr.1424.1.S1_at    | Hypothetical protein                                      | -4.41 |
| Mtr.4814.1.S1_at    | AROGP2                                                    | -4.41 |
| Mtr.43889.1.S1_at   | Beta-1,3-glucanase                                        | -4.41 |
| Msa.1230.1.S1_at    | Hypothetical protein                                      | -4.41 |
| Mtr.32117.1.S1_at   | Hypothetical protein                                      | -4.40 |
| Msa.1490.1.S1_at    | Hypothetical protein                                      | -4.40 |

|                     |                                                         |       |
|---------------------|---------------------------------------------------------|-------|
| Mtr.38303.1.S1_at   | Hypothetical protein                                    | -4.40 |
| Mtr.44684.1.S1_at   | Nucleotide pyrophosphatase                              | -4.39 |
| Mtr.9616.1.S1_at    | Hypothetical protein                                    | -4.39 |
| Msa.1588.1.S1_at    | Hypothetical protein                                    | -4.39 |
| Mtr.10607.1.S1_at   | PS60 protein                                            | -4.39 |
| Mtr.12858.1.S1_at   | Hypothetical protein                                    | -4.39 |
| Msa.1651.1.S1_at    | Hypothetical protein                                    | -4.39 |
| Mtr.14519.1.S1_a_at | RNA-binding region RNP-1                                | -4.38 |
| Mtr.41249.1.S1_at   | 30S ribosomal protein S13                               | -4.38 |
| Mtr.43590.1.S1_at   | Hypothetical protein                                    | -4.38 |
| Mtr.44918.1.S1_at   | Lysophospholipase 1                                     | -4.38 |
| Mtr.33007.1.S1_at   | Hypothetical protein                                    | -4.38 |
| Mtr.5253.1.S1_s_at  | Hypothetical protein                                    | -4.38 |
| Mtr.28159.1.S1_at   | AP2 domain transcription factor                         | -4.38 |
| Mtr.31078.1.S1_at   | CPD photolyase                                          | -4.38 |
| Mtr.44666.1.S1_at   | Carboxyl terminal protease                              | -4.37 |
| Mtr.43826.1.S1_at   | Hypothetical protein                                    | -4.37 |
| Mtr.20860.1.S1_at   | Hypothetical protein                                    | -4.37 |
| Mtr.1559.1.S1_s_at  | Calcineurin B-like protein 10                           | -4.37 |
| Mtr.32683.1.S1_at   | Tetratricopeptide repeat (TPR)-containing protein       | -4.37 |
| Mtr.19693.1.S1_at   | Zinc-containing alcohol dehydrogenase                   | -4.37 |
| Mtr.40232.1.S1_s_at | Geranylgeranyl hydrogenase                              | -4.37 |
| Mtr.9173.1.S1_at    | Hypothetical protein                                    | -4.37 |
| Mtr.40525.1.S1_at   | Hypothetical protein                                    | -4.36 |
| Mtr.22479.1.S1_at   | Anthocyanin 1                                           | -4.36 |
| Mtr.34131.1.S1_at   | NADP dependent malic enzyme                             | -4.36 |
| Mtr.47321.1.S1_s_at | DNA-directed RNA polymerase beta chain                  | -4.36 |
| Mtr.48754.1.S1_at   | Dihydrodipicolinate reductase                           | -4.35 |
| Mtr.10104.1.S1_at   | Ornithine decarboxylase                                 | -4.35 |
| Mtr.8397.1.S1_at    | Anthranilate synthase alpha subunit                     | -4.35 |
| Mtr.37955.1.S1_at   | Hypothetical protein                                    | -4.35 |
| Mtr.40305.1.S1_at   | Hypothetical protein                                    | -4.35 |
| Mtr.49527.1.S1_at   | Lipolytic enzyme                                        | -4.35 |
| Msa.2740.1.S1_at    | Hypothetical protein                                    | -4.35 |
| Mtr.37930.1.S1_at   | Hypothetical protein                                    | -4.35 |
| Mtr.11591.1.S1_at   | Constitutively photomorphogenic 1 protein               | -4.35 |
| Mtr.7633.1.S1_at    | Hypothetical protein                                    | -4.35 |
| Mtr.28691.1.S1_at   | Nine-cis-epoxycarotenoid dioxygenase3                   | -4.34 |
| Mtr.39369.1.S1_at   | 33 kd chloroplast ribonucleoprotein                     | -4.34 |
| Mtr.40558.1.S1_at   | Short-chain alcohol dehydrogenase                       | -4.34 |
| Mtr.50015.1.S1_s_at | Hypothetical protein                                    | -4.34 |
| Mtr.44759.1.S1_at   | E-beta-ocimene synthase                                 | -4.34 |
| Mtr.35494.1.S1_at   | Hypothetical protein                                    | -4.33 |
| Mtr.16234.1.S1_at   | Hypothetical protein                                    | -4.33 |
| Msa.3079.1.S1_at    | Hypothetical protein                                    | -4.33 |
| Mtr.42503.1.S1_at   | Isoflavonoid glucosyltransferase                        | -4.33 |
| Msa.1903.1.S1_at    | Hypothetical protein                                    | -4.33 |
| Mtr.10800.1.S1_at   | Hypothetical protein                                    | -4.33 |
| Mtr.9062.1.S1_at    | Hypothetical protein                                    | -4.33 |
| Mtr.5351.1.S1_at    | Cuticle protein (Faceless pollen-1) (YORE-YORE protein) | -4.33 |
| Mtr.48631.1.S1_at   | Sugar transporter                                       | -4.33 |
| Msa.3021.1.S1_at    | Hypothetical protein                                    | -4.32 |
| Mtr.49348.1.S1_at   | Proteinase inhibitor I25                                | -4.32 |
| Mtr.40297.1.S1_at   | Cytochrome b6f complex subunit                          | -4.32 |

|                     |                                                   |       |
|---------------------|---------------------------------------------------|-------|
| Mtr.37072.1.S1_at   | Hypothetical protein                              | -4.32 |
| Mtr.3201.1.S1_at    | LysM domain-containing receptor-like kinase 1     | -4.31 |
| Msa.1138.1.S1_at    | Hypothetical protein                              | -4.31 |
| Mtr.31183.1.S1_x_at | Long-chain-fatty-acid--CoA ligase 6               | -4.31 |
| Msa.3039.1.S1_at    | Hypothetical protein                              | -4.31 |
| Mtr.38360.1.S1_at   | Hypothetical protein                              | -4.31 |
| Mtr.41054.1.S1_at   | UDP-glucose glucosyltransferase                   | -4.31 |
| Mtr.49132.1.S1_at   | Ferredoxin                                        | -4.31 |
| Mtr.762.1.S1_at     | 2OG-Fe(II) oxygenase                              | -4.30 |
| Mtr.21135.1.S1_at   | 2OG-Fe(II) oxygenase                              | -4.30 |
| Mtr.8254.1.S1_at    | Hypothetical protein                              | -4.30 |
| Mtr.13924.1.S1_at   | Glucosyltransferase like protein                  | -4.29 |
| Mtr.9820.1.S1_at    | MADS box protein                                  | -4.29 |
| Mtr.20814.1.S1_at   | Zn-finger, CCHC type                              | -4.29 |
| Mtr.44890.1.S1_at   | Calcium binding protein                           | -4.29 |
| Mtr.42512.1.S1_at   | Sugar transporter                                 | -4.28 |
| Mtr.41591.1.S1_at   | 3-ketoacyl-ACP synthase                           | -4.28 |
| Mtr.24188.1.S1_at   | Hypothetical protein                              | -4.28 |
| Mtr.19007.1.S1_at   | Barwin-related endoglucanase                      | -4.28 |
| Mtr.3319.1.S1_s_at  | Hypothetical protein                              | -4.28 |
| Mtr.37341.1.S1_at   | Mannitol dehydrogenase                            | -4.28 |
| Mtr.34220.1.S1_at   | Hypothetical protein                              | -4.28 |
| Mtr.8830.1.S1_at    | Hypothetical protein                              | -4.28 |
| Mtr.50857.1.S1_s_at | Peptidase S10                                     | -4.28 |
| Mtr.1962.1.S1_at    | MRP-like ABC transporter                          | -4.28 |
| Mtr.11881.1.S1_at   | Hypothetical protein                              | -4.27 |
| Mtr.9049.1.S1_at    | Sbp65a protein                                    | -4.27 |
| Mtr.40759.1.S1_at   | TatC                                              | -4.26 |
| Mtr.5456.1.S1_at    | Hypothetical protein                              | -4.26 |
| Mtr.44147.1.S1_at   | Lipid transfer protein                            | -4.26 |
| Mtr.37091.1.S1_at   | Hypothetical protein                              | -4.26 |
| Mtr.21709.1.S1_at   | Hypothetical protein                              | -4.26 |
| Mtr.11319.1.S1_at   | Hypothetical protein                              | -4.26 |
| Mtr.35041.1.S1_s_at | Glutamate receptor 3.3                            | -4.26 |
| Mtr.8775.1.S1_at    | Hypothetical protein                              | -4.25 |
| Msa.1739.1.S1_at    | Hypothetical protein                              | -4.24 |
| Mtr.21146.1.S1_at   | Zn-finger, RING                                   | -4.24 |
| Msa.1400.1.S1_at    | Hypothetical protein                              | -4.24 |
| Mtr.24083.1.S1_s_at | Uroporphyrinogen decarboxylase                    | -4.24 |
| Mtr.43288.1.S1_at   | Diphenol oxidase                                  | -4.24 |
| Mtr.44223.1.S1_at   | Mitochondrial aspartate-glutamate carrier protein | -4.23 |
| Msa.1977.1.S1_at    | Hypothetical protein                              | -4.23 |
| Mtr.33530.1.S1_at   | Hypothetical protein                              | -4.22 |
| Mtr.25580.1.S1_at   | Hypothetical protein                              | -4.22 |
| Mtr.20125.1.S1_at   | Glycoside hydrolase                               | -4.22 |
| Mtr.12617.1.S1_at   | Hypothetical protein                              | -4.22 |
| Mtr.27444.1.S1_at   | Hypothetical protein                              | -4.22 |
| Msa.3181.1.S1_at    | Hypothetical protein                              | -4.22 |
| Mtr.39481.1.S1_at   | Hypothetical protein                              | -4.21 |
| Mtr.48937.1.S1_at   | Hypothetical protein                              | -4.21 |
| Mtr.38815.1.S1_at   | Pair-rule protein                                 | -4.21 |
| Mtr.40653.1.S1_at   | Hypothetical protein                              | -4.21 |
| Mtr.1068.1.S1_s_at  | Hypothetical protein                              | -4.21 |
| Mtr.43598.1.S1_at   | Polygalacturonase-like protein                    | -4.20 |

|                     |                                       |       |
|---------------------|---------------------------------------|-------|
| Mtr.42284.1.S1_at   | Hypothetical protein                  | -4.20 |
| Mtr.47389.1.S1_at   | Hypothetical protein                  | -4.20 |
| Mtr.3096.1.S1_at    | Glycosyl hydrolase                    | -4.19 |
| Mtr.38410.1.S1_at   | bZIP50 protein                        | -4.19 |
| Mtr.42658.1.S1_at   | Ski protein                           | -4.19 |
| Mtr.41864.1.S1_at   | Hypothetical protein                  | -4.19 |
| Mtr.34410.1.S1_at   | Hypothetical protein                  | -4.19 |
| Mtr.8908.1.S1_at    | Hypothetical protein                  | -4.18 |
| Msa.2828.1.S1_at    | Hypothetical protein                  | -4.18 |
| Mtr.31151.1.S1_at   | Hypothetical protein                  | -4.17 |
| Mtr.24230.1.S1_at   | Isoflavone reductase                  | -4.17 |
| Mtr.21515.1.S1_at   | Cellulose synthase                    | -4.16 |
| Mtr.33410.1.S1_at   | Hypothetical protein                  | -4.16 |
| Mtr.18494.1.S1_at   | ZF-HD homeobox protein                | -4.16 |
| Mtr.10248.1.S1_at   | Peroxidase precursor                  | -4.16 |
| Mtr.35286.1.S1_at   | Twist related protein 1               | -4.16 |
| Mtr.50199.1.S1_at   | Hypothetical protein                  | -4.16 |
| Mtr.17661.1.S1_at   | Polyprenyl synthetase                 | -4.16 |
| Mtr.12407.1.S1_at   | Glutamate decarboxylase               | -4.15 |
| Mtr.32828.1.S1_at   | Nodulin-like protein                  | -4.15 |
| Mtr.39920.1.S1_at   | Receptor like protein                 | -4.15 |
| Mtr.13998.1.S1_at   | Hypothetical protein                  | -4.14 |
| Mtr.10045.1.S1_at   | Hypothetical protein                  | -4.14 |
| Mtr.6279.1.S1_at    | LIM domain containing protein         | -4.14 |
| Mtr.13942.1.S1_at   | Polyphosphoinositide binding protein  | -4.14 |
| Mtr.44469.1.S1_at   | Prolyl carboxypeptidase               | -4.14 |
| Mtr.45048.1.S1_s_at | Hypothetical protein                  | -4.13 |
| Mtr.48994.1.S1_at   | Hypothetical protein                  | -4.13 |
| Mtr.10312.1.S1_at   | Phytochelatin synthetase-like protein | -4.13 |
| Msa.2987.1.S1_at    | Hypothetical protein                  | -4.13 |
| Mtr.17362.1.S1_at   | Beta-Ig-H3/fasciclin                  | -4.12 |
| Mtr.43311.1.S1_at   | BURP domain-containing protein        | -4.12 |
| Mtr.13829.1.S1_at   | Hypothetical protein                  | -4.12 |
| Mtr.43596.1.S1_at   | Plastid ribosomal protein L19         | -4.11 |
| Mtr.35162.1.S1_at   | Hypothetical protein                  | -4.11 |
| Mtr.51697.1.S1_at   | Beta-lactamase                        | -4.11 |
| Mtr.31658.1.S1_s_at | GAI-like protein                      | -4.11 |
| Mtr.11542.1.S1_s_at | Hypothetical protein                  | -4.11 |
| Mtr.20633.1.S1_at   | General substrate transporter         | -4.11 |
| Mtr.6765.1.S1_at    | Hypothetical protein                  | -4.11 |
| Mtr.9912.1.S1_at    | Hypothetical protein                  | -4.11 |
| Mtr.8443.1.S1_at    | Hypothetical protein                  | -4.11 |
| Mtr.34112.1.S1_at   | Ferredoxin-thioredoxin reductase      | -4.11 |
| Mtr.4867.1.S1_s_at  | Hypothetical protein                  | -4.11 |
| Mtr.24418.1.S1_at   | Cytochrome P450                       | -4.11 |
| Mtr.15549.1.S1_at   | Hypothetical protein                  | -4.10 |
| Mtr.40695.1.S1_s_at | Hypothetical protein                  | -4.10 |
| Mtr.43518.1.S1_at   | Plastidic cysteine synthase 1         | -4.10 |
| Mtr.36903.1.S1_at   | C1C-Nt1 protein                       | -4.10 |
| Mtr.7553.1.S1_at    | Alanine acetyl transferase            | -4.10 |
| Mtr.44280.1.S1_at   | Avr9/Cf-9 induced kinase 1            | -4.10 |
| Mtr.45399.1.S1_at   | Hypothetical protein                  | -4.10 |
| Mtr.6706.1.S1_at    | Hypothetical protein                  | -4.10 |
| Mtr.4975.1.S1_s_at  | SRG1 protein                          | -4.10 |

|                      |                                           |       |
|----------------------|-------------------------------------------|-------|
| Msa.473.1.S1_at      | Hypothetical protein                      | -4.09 |
| Mtr.9483.1.S1_at     | Hypothetical protein                      | -4.09 |
| Mtr.10331.1.S1_at    | Orcinol O-methyltransferase               | -4.08 |
| Mtr.19679.1.S1_s_at  | Phospholipase/Carboxylesterase            | -4.08 |
| Mtr.13051.1.S1_at    | Glucose-6-phosphate 1-dehydrogenase 1     | -4.08 |
| Mtr.37175.1.S1_at    | Chlorophyll a/b binding protein           | -4.08 |
| Mtr.37696.1.S1_at    | Scarecrow-like 6                          | -4.07 |
| Mtr.43082.1.S1_at    | Omega-6 fatty acid desaturase             | -4.07 |
| Mtr.35210.1.S1_at    | Kinase like protein                       | -4.06 |
| Mtr.45418.1.S1_at    | Hypothetical protein                      | -4.06 |
| Mtr.32736.1.S1_at    | Hypothetical protein                      | -4.06 |
| Mtr.13236.1.S1_at    | Glucose-6-phosphate dehydrogenase         | -4.06 |
| Mtr.10705.1.S1_at    | GPI-anchored protein                      | -4.05 |
| AFFX-Mtr-gsta-M_x_at | 2,4-D inducible glutathione S-transferase | -4.05 |
| Mtr.43200.1.S1_at    | Adenosine 5'-phosphosulfate reductase     | -4.05 |
| Mtr.49874.1.S1_at    | Zn-finger, RING                           | -4.05 |
| Mtr.9857.1.S1_at     | Hypothetical protein                      | -4.05 |
| Mtr.24535.1.S1_at    | Peroxidase                                | -4.05 |
| Mtr.37893.1.S1_s_at  | Cytochrome P450 monooxygenase             | -4.05 |
| Mtr.37615.1.S1_at    | Hypothetical protein                      | -4.05 |
| Mtr.6751.1.S1_at     | Hypothetical protein                      | -4.05 |
| Mtr.31344.1.S1_at    | Oxidoreductase                            | -4.04 |
| Mtr.32315.1.S1_at    | Hypothetical protein                      | -4.04 |
| Mtr.18567.1.S1_at    | Pyruvate kinase                           | -4.04 |
| Mtr.13750.1.S1_at    | Eent-kaurenoic acid hydroxylase           | -4.04 |
| Mtr.27829.1.S1_at    | Heat shock factor protein hsf8            | -4.04 |
| Mtr.43479.1.S1_at    | Hypothetical protein                      | -4.03 |
| Mtr.51015.1.S1_at    | Hypothetical protein                      | -4.03 |
| Mtr.9347.1.S1_at     | Hypothetical protein                      | -4.03 |
| Mtr.33661.1.S1_at    | Subtilisin-like serine proteinase         | -4.03 |
| Mtr.38643.1.S1_s_at  | Sucrose-phosphate synthase                | -4.03 |
| Mtr.11974.1.S1_at    | Hypothetical protein                      | -4.03 |
| Mtr.12889.1.S1_at    | ATPase-like protein                       | -4.03 |
| Msa.1696.1.S1_at     | Hypothetical protein                      | -4.03 |
| Mtr.4862.1.S1_at     | Oxidoreductase                            | -4.03 |
| Mtr.7840.1.S1_at     | Hypothetical protein                      | -4.03 |
| Msa.1612.1.S1_at     | Hypothetical protein                      | -4.02 |
| Mtr.2337.1.S1_at     | Hypothetical protein                      | -4.02 |
| Mtr.14519.1.S1_at    | RNA-binding region RNP-1                  | -4.02 |
| Mtr.40308.1.S1_at    | Monofunctional aspartokinase              | -4.02 |
| Mtr.36799.1.S1_s_at  | Hypothetical protein                      | -4.02 |
| Mtr.31405.1.S1_at    | CDR1                                      | -4.02 |
| Mtr.31183.1.S1_at    | Long-chain-fatty-acid--CoA ligase 6       | -4.02 |
| Mtr.223.1.S1_at      | Photolyase/blue-light receptor            | -4.01 |
| Mtr.8707.1.S1_at     | Hypothetical protein                      | -4.01 |
| Mtr.12803.1.S1_at    | Pyridoxamine 5-phosphate oxidase          | -4.01 |
| Mtr.37164.1.S1_at    | Heat shock factor                         | -4.01 |
| Mtr.24495.1.S1_at    | Photosystem II 32 kDa protein             | -4.01 |
| Mtr.43000.1.S1_at    | Hypothetical protein                      | -4.01 |
| Mtr.6500.1.S1_at     | Alcohol NADP+ oxidoreductase              | -4.01 |
| Mtr.27067.1.S1_at    | DNA binding with one finger               | -4.01 |
| Mtr.51659.1.S1_at    | Hypothetical protein                      | -4.01 |
| Mtr.43904.1.S1_at    | Cyclase-like protein                      | -4.01 |
| Mtr.41461.1.S1_at    | Hypothetical protein                      | -4.00 |

|                     |                                                                             |       |
|---------------------|-----------------------------------------------------------------------------|-------|
| Mtr.45126.1.S1_at   | Hypothetical protein                                                        | -4.00 |
| Mtr.37315.1.S1_at   | Glycolate oxidase                                                           | -4.00 |
| Mtr.49120.1.S1_s_at | Cysteine synthase A                                                         | -4.00 |
| Mtr.32523.1.S1_at   | Peptide transporter                                                         | -4.00 |
| Mtr.13752.1.S1_at   | Calcineurin B-like protein 10                                               | -4.00 |
| Mtr.14341.1.S1_at   | Calponin-like actin-binding protein                                         | -4.00 |
| Mtr.15256.1.S1_at   | RNA-binding region RNP-1                                                    | -4.00 |
| Msa.1866.1.S1_s_at  | Hypothetical protein                                                        | -3.99 |
| Mtr.50712.1.S1_at   | Hypothetical protein                                                        | -3.99 |
| Mtr.42622.1.S1_s_at | Maturase                                                                    | -3.99 |
| Msa.1405.1.S1_at    | Hypothetical protein                                                        | -3.99 |
| Mtr.15321.1.S1_at   | Serine/threonine protein phosphatase and bis(5-nucleosyl)-tetrakisphosphate | -3.99 |
| Mtr.7389.1.S1_s_at  | Yippee-like protein                                                         | -3.99 |
| Mtr.21847.1.S1_at   | Hypothetical protein                                                        | -3.99 |
| Mtr.37666.1.S1_at   | Hypothetical protein                                                        | -3.99 |
| Msa.2217.1.S1_at    | Hypothetical protein                                                        | -3.99 |
| Mtr.25510.1.S1_at   | Glycosyl hydrolase                                                          | -3.99 |
| Mtr.44402.1.S1_at   | Hypothetical protein                                                        | -3.99 |
| Mtr.26041.1.S1_at   | Hypothetical protein                                                        | -3.98 |
| Mtr.36799.1.S1_at   | Hypothetical protein                                                        | -3.98 |
| Mtr.4063.1.S1_at    | Hypothetical protein                                                        | -3.98 |
| Mtr.39361.1.S1_at   | Glucanase like protein                                                      | -3.98 |
| Mtr.43749.1.S1_s_at | Hypothetical protein                                                        | -3.98 |
| Mtr.1770.1.S1_at    | Protein kinase                                                              | -3.98 |
| Mtr.6062.1.S1_at    | Deoxyribonuclease II                                                        | -3.98 |
| Mtr.39386.1.S1_at   | Hypothetical protein                                                        | -3.98 |
| Mtr.9652.1.S1_at    | Hypothetical protein                                                        | -3.98 |
| Mtr.43995.1.S1_at   | Hypothetical protein                                                        | -3.97 |
| Mtr.9808.1.S1_at    | Hypothetical protein                                                        | -3.97 |
| Mtr.10767.1.S1_at   | Agmatine Iminohydrolase                                                     | -3.97 |
| Mtr.12679.1.S1_at   | Peroxiredoxin-like protein                                                  | -3.97 |
| Msa.1951.1.S1_s_at  | Hypothetical protein                                                        | -3.97 |
| Mtr.42054.1.S1_at   | Glu-tRNA(Gln) amidotransferase subunit A                                    | -3.97 |
| Mtr.43600.1.S1_at   | Hypothetical protein                                                        | -3.97 |
| Mtr.7035.1.S1_at    | Hypothetical protein                                                        | -3.97 |
| Mtr.7071.1.S1_at    | Alcohol oxidase                                                             | -3.97 |
| Mtr.33925.1.S1_at   | Hypothetical protein                                                        | -3.97 |
| Mtr.51665.1.S1_s_at | Photosynthetic reaction centre protein                                      | -3.97 |
| Mtr.21631.1.S1_at   | Peptide chain release factor 2                                              | -3.96 |
| Mtr.39702.1.S1_at   | Hypothetical protein                                                        | -3.96 |
| Mtr.8968.1.S1_at    | Hypothetical protein                                                        | -3.96 |
| Mtr.9665.1.S1_at    | Oikosin 4A protein                                                          | -3.96 |
| Mtr.10227.1.S1_at   | Cytochrome P450-like protein                                                | -3.96 |
| Mtr.10332.1.S1_at   | Class Ib chitinase                                                          | -3.96 |
| Mtr.43824.1.S1_at   | Thioredoxin M-type 3                                                        | -3.96 |
| Msa.1751.1.S1_at    | Hypothetical protein                                                        | -3.96 |
| Msa.1814.1.S1_at    | Hypothetical protein                                                        | -3.95 |
| Mtr.115.1.S1_at     | Hypothetical protein                                                        | -3.95 |
| Mtr.16995.1.S1_at   | Hypothetical protein                                                        | -3.95 |
| Mtr.42539.1.S1_at   | Hypothetical protein                                                        | -3.95 |
| Mtr.34879.1.S1_at   | Hypothetical protein                                                        | -3.95 |
| Mtr.5449.1.S1_at    | Hypothetical protein                                                        | -3.95 |
| Mtr.34451.1.S1_at   | Hypothetical protein                                                        | -3.95 |
| Mtr.5356.1.S1_s_at  | Beta-mannosidase                                                            | -3.95 |



|                     |                                                                  |       |
|---------------------|------------------------------------------------------------------|-------|
| Mtr.31794.1.S1_s_at | Hypothetical protein                                             | -3.95 |
| Mtr.10926.1.S1_at   | Thylakoid lumenal 17.4 kDa protein                               | -3.94 |
| Mtr.40998.1.S1_at   | Hypothetical protein                                             | -3.94 |
| Mtr.1621.1.S1_at    | Hypothetical protein                                             | -3.94 |
| Mtr.27403.1.S1_at   | Hypothetical protein                                             | -3.94 |
| Mtr.38209.1.S1_at   | Polysaccharide ABC transporter                                   | -3.94 |
| Mtr.31189.1.S1_at   | Trehalose-6-phosphate phosphatase                                | -3.94 |
| Mtr.6074.1.S1_at    | Valine-tRNA ligase                                               | -3.94 |
| Mtr.33779.1.S1_at   | Threonyl-tRNA synthetase                                         | -3.93 |
| Mtr.5452.1.S1_at    | ABC transporter                                                  | -3.93 |
| Mtr.33726.1.S1_at   | Sugar transporter                                                | -3.93 |
| Msa.1835.1.S1_at    | Hypothetical protein                                             | -3.93 |
| Mtr.9095.1.S1_at    | 30S ribosomal protein S9                                         | -3.93 |
| Mtr.5125.1.S1_s_at  | Isoflavone reductase                                             | -3.93 |
| Mtr.12359.1.S1_at   | enod40 mRNA for non-translatable RNA                             | -3.93 |
| Mtr.31487.1.S1_s_at | Agmatine Iminohydrolase                                          | -3.93 |
| Msa.2707.1.S1_at    | Hypothetical protein                                             | -3.93 |
| Mtr.10025.1.S1_at   | Phosphoribosylanthranilate transferase-like protein              | -3.93 |
| Mtr.34499.1.S1_at   | Hypothetical protein                                             | -3.92 |
| Mtr.31664.1.S1_at   | Hypothetical protein                                             | -3.92 |
| Mtr.11249.1.S1_s_at | Calcineurin B-like protein 10                                    | -3.92 |
| Mtr.43492.1.S1_at   | Hypothetical protein                                             | -3.92 |
| Mtr.6699.1.S1_at    | Lhcb2 protein (Light harvesting chlorophyll a/b-binding protein) | -3.92 |
| Mtr.40976.1.S1_at   | Transcription factor Hap5a                                       | -3.92 |
| Mtr.9854.1.S1_at    | Hypothetical protein                                             | -3.91 |
| Mtr.33742.1.S1_at   | Acyl-CoA thioesterase                                            | -3.91 |
| Mtr.50217.1.S1_s_at | AFG1-like ATPase                                                 | -3.91 |
| Mtr.42769.1.S1_at   | Hypothetical protein                                             | -3.91 |
| Mtr.15971.1.S1_at   | Glycine cleavage T protein                                       | -3.90 |
| Mtr.33769.1.S1_s_at | Prolyl carboxypeptidase                                          | -3.90 |
| Mtr.9861.1.S1_at    | Hypothetical protein                                             | -3.90 |
| Mtr.49014.1.S1_at   | SNO glutamine amidotransferase                                   | -3.90 |
| Mtr.9263.1.S1_at    | Glycine-tRNA ligase                                              | -3.90 |
| Mtr.2661.1.S1_at    | Serine acetyltransferase                                         | -3.90 |
| Msa.1021.1.S1_at    | Hypothetical protein                                             | -3.90 |
| Mtr.44584.1.S1_at   | Transfactor-like protein                                         | -3.90 |
| Mtr.16432.1.S1_at   | Myb, DNA-binding                                                 | -3.89 |
| Mtr.25689.1.S1_at   | UDP-glucose 6-dehydrogenase                                      | -3.89 |
| Mtr.10665.1.S1_at   | Hypothetical protein                                             | -3.89 |
| Mtr.24561.1.S1_s_at | UDP-glycosyltransferase                                          | -3.89 |
| Mtr.10873.1.S1_at   | Hypothetical protein                                             | -3.89 |
| Mtr.9105.1.S1_at    | Coproporphyrinogen oxidase                                       | -3.89 |
| Mtr.42749.1.S1_at   | Late embryogenesis abundant protein 1                            | -3.88 |
| Mtr.24331.1.S1_s_at | Hypothetical protein                                             | -3.88 |
| Mtr.6750.1.S1_at    | Serine carboxypeptidase                                          | -3.88 |
| Mtr.5788.1.S1_s_at  | Hypothetical protein                                             | -3.88 |
| Mtr.34815.1.S1_at   | Hypothetical protein                                             | -3.88 |
| Mtr.44320.1.S1_at   | Hypothetical protein                                             | -3.87 |
| Mtr.29176.1.S1_at   | Metal-dependent phosphohydrolase HD domain-containing protein    | -3.87 |
| Mtr.31537.1.S1_at   | Hypothetical protein                                             | -3.87 |
| Mtr.9268.1.S1_at    | Hypothetical protein                                             | -3.87 |
| Mtr.32795.1.S1_s_at | Hypothetical protein                                             | -3.86 |
| Mtr.32230.1.S1_at   | Glycine-sarcosine methyltransferase                              | -3.86 |
| Mtr.27907.1.S1_at   | Pectate lyase                                                    | -3.86 |

|                     |                                                |       |
|---------------------|------------------------------------------------|-------|
| Mtr.13579.1.S1_at   | Photoreceptor-interacting transcription factor | -3.86 |
| Mtr.3013.1.S1_at    | UDP-glucuronosyltransferase                    | -3.86 |
| Msa.1661.1.S1_at    | Hypothetical protein                           | -3.86 |
| Mtr.4981.1.S1_at    | Dehydration-responsive protein                 | -3.86 |
| Mtr.33111.1.S1_at   | Hypothetical protein                           | -3.86 |
| Mtr.32670.1.S1_at   | UDP-glucose:salicylic acid glucosyltransferase | -3.86 |
| Mtr.2881.1.S1_at    | Hypothetical protein                           | -3.86 |
| Mtr.42999.1.S1_at   | Photosystem I psaH                             | -3.85 |
| Mtr.34594.1.S1_s_at | Thylakoid lumenal 17.4 kDa protein             | -3.85 |
| Mtr.40506.1.S1_at   | Serine carboxypeptidase II                     | -3.85 |
| Mtr.33014.1.S1_s_at | Hypothetical protein                           | -3.85 |
| Mtr.5656.1.S1_at    | Vacuolar H <sup>+</sup> -ATPase B subunit      | -3.85 |
| Mtr.52119.1.S1_at   | Protein phosphatase 2C                         | -3.84 |
| Mtr.2385.1.S1_at    | Hypothetical protein                           | -3.84 |
| Mtr.19691.1.S1_at   | Hypothetical protein                           | -3.84 |
| Mtr.48864.1.S1_at   | Zn-finger, Dof type                            | -3.84 |
| Mtr.37352.1.S1_at   | Trypsin protein inhibitor 3                    | -3.84 |
| Msa.2735.1.S1_at    | Hypothetical protein                           | -3.84 |
| Mtr.38283.1.S1_at   | Hypothetical protein                           | -3.84 |
| Mtr.37927.1.S1_at   | Hypothetical protein                           | -3.84 |
| Mtr.11721.1.S1_at   | Lycopene epsilon-cyclase                       | -3.84 |
| Mtr.34395.1.S1_at   | Hypothetical protein                           | -3.83 |
| Mtr.46510.1.S1_at   | Alpha/beta-amyrin synthase                     | -3.83 |
| Mtr.36918.1.S1_at   | Hypothetical protein                           | -3.83 |
| Msa.1716.1.S1_at    | Hypothetical protein                           | -3.83 |
| Mtr.40695.1.S1_at   | Hypothetical protein                           | -3.83 |
| Mtr.43250.1.S1_at   | Subtilisin-like protease                       | -3.83 |
| Mtr.28655.1.S1_at   | Hypothetical protein                           | -3.83 |
| Mtr.29249.1.S1_at   | Hypothetical protein                           | -3.83 |
| Mtr.44847.1.S1_at   | Glycosyltransferase family protein             | -3.83 |
| Mtr.12787.1.S1_at   | Membrane-associated 30 kDa protein             | -3.82 |
| Mtr.28729.1.S1_at   | Serine protease                                | -3.82 |
| Mtr.20942.1.S1_x_at | Serine/threonine protein kinase                | -3.82 |
| Mtr.32655.1.S1_at   | Hypothetical protein                           | -3.82 |
| Mtr.37821.1.S1_at   | Hypothetical protein                           | -3.82 |
| Mtr.2587.1.S1_at    | Membrane-associated salt-inducible protein     | -3.82 |
| Mtr.33734.1.S1_at   | Phosphoglycerate mutase                        | -3.82 |
| Mtr.50700.1.S1_s_at | Serine/threonine protein kinase                | -3.82 |
| Mtr.9977.1.S1_at    | Hypothetical protein                           | -3.81 |
| Mtr.31819.1.S1_at   | UDP rhamnose                                   | -3.81 |
| Mtr.7957.1.S1_at    | Hypothetical protein                           | -3.81 |
| Mtr.50814.1.S1_at   | Hypothetical protein                           | -3.81 |
| Mtr.41311.1.S1_at   | Hypothetical protein                           | -3.81 |
| Mtr.27078.1.S1_at   | Selenium-binding protein                       | -3.81 |
| Mtr.51464.1.S1_at   | Hypothetical protein                           | -3.81 |
| Mtr.26276.1.S1_at   | CER1 protein                                   | -3.81 |
| Mtr.13501.1.S1_at   | Alanyl-tRNA synthetase                         | -3.81 |
| Mtr.14002.1.S1_at   | Calcium binding protein                        | -3.81 |
| Mtr.10876.1.S1_at   | Hypothetical protein                           | -3.80 |
| Mtr.27872.1.S1_at   | ATPase                                         | -3.80 |
| Mtr.4684.1.S1_s_at  | Hypothetical protein                           | -3.80 |
| Mtr.39477.1.S1_at   | Myosin-like protein                            | -3.80 |
| Mtr.22763.1.S1_at   | Hypothetical protein                           | -3.79 |
| Mtr.17972.1.S1_at   | Glycoside hydrolase                            | -3.79 |

|                     |                                                   |       |
|---------------------|---------------------------------------------------|-------|
| Mtr.13783.1.S1_at   | Hypothetical protein                              | -3.79 |
| Mtr.3440.1.S1_at    | Hypothetical protein                              | -3.79 |
| Mtr.19629.1.S1_at   | Hypothetical protein                              | -3.79 |
| Mtr.44465.1.S1_at   | Amino acid transporter                            | -3.79 |
| Mtr.26277.1.S1_at   | Lycopene beta-cyclase                             | -3.79 |
| Mtr.14580.1.S1_at   | Zn-finger, RING                                   | -3.79 |
| Mtr.8926.1.S1_at    | Alpha-D-xylosidase                                | -3.79 |
| Mtr.36687.1.S1_at   | Hypothetical protein                              | -3.78 |
| Mtr.40975.1.S1_at   | Nitrite transport protein                         | -3.78 |
| Mtr.44765.1.S1_at   | Lycopene epsilon cyclase                          | -3.78 |
| Mtr.38225.1.S1_at   | Arm repeat-containing protein                     | -3.78 |
| Mtr.24451.1.S1_at   | Hypothetical protein                              | -3.78 |
| Mtr.11518.1.S1_at   | Hypothetical protein                              | -3.78 |
| Mtr.39462.1.S1_at   | Glu-tRNA(Gln) amidotransferase subunit A          | -3.78 |
| Mtr.17822.1.S1_at   | Cytochrome P450                                   | -3.78 |
| Msa.1046.1.S1_at    | Hypothetical protein                              | -3.77 |
| Mtr.9325.1.S1_at    | Hypothetical protein                              | -3.77 |
| Mtr.15048.1.S1_s_at | HAD-superfamily subfamily IIA hydrolase           | -3.77 |
| Mtr.6354.1.S1_at    | Tetratricopeptide repeat (TPR)-containing protein | -3.77 |
| Mtr.39039.1.S1_at   | Ankyrin like protein                              | -3.77 |
| Mtr.29065.1.S1_at   | GTP cyclohydrolase I                              | -3.77 |
| Mtr.40639.1.S1_at   | Hypothetical protein                              | -3.77 |
| Mtr.5058.1.S1_at    | Cryptochrome 1                                    | -3.77 |
| Mtr.43528.1.S1_at   | Fructokinase 3                                    | -3.76 |
| Mtr.5171.1.S1_at    | Hypothetical protein                              | -3.76 |
| Mtr.37464.1.S1_at   | Hypothetical protein                              | -3.76 |
| Mtr.32351.1.S1_at   | Hypothetical protein                              | -3.76 |
| Mtr.5236.1.S1_s_at  | Hypothetical protein                              | -3.76 |
| Mtr.5850.1.S1_at    | Protein kinase                                    | -3.76 |
| Mtr.12644.1.S1_at   | Fiber protein Fb34                                | -3.76 |
| Mtr.10288.1.S1_at   | Kinase like protein                               | -3.76 |
| Mtr.39152.1.S1_at   | Mitochondrial half-ABC transporter                | -3.76 |
| Mtr.42188.1.S1_at   | Yippee-like protein                               | -3.76 |
| Mtr.31137.1.S1_at   | Hypothetical protein                              | -3.76 |
| Mtr.15596.1.S1_s_at | C2 calcium/lipid-binding protein                  | -3.76 |
| Mtr.16273.1.S1_at   | Proteinase inhibitor I12                          | -3.75 |
| Mtr.33519.1.S1_at   | Cold acclimation responsive protein               | -3.75 |
| Mtr.8447.1.S1_s_at  | Hypothetical protein                              | -3.75 |
| Mtr.8728.1.S1_at    | Hypothetical protein                              | -3.75 |
| Mtr.23870.1.S1_at   | Hypothetical protein                              | -3.75 |
| Mtr.11939.1.S1_at   | RelA-SpoT like protein RSH1                       | -3.75 |
| Mtr.6773.1.S1_at    | Myosin heavy chain-like protein                   | -3.75 |
| Msa.399.1.S1_at     | Hypothetical protein                              | -3.74 |
| Mtr.6087.1.S1_at    | Hypothetical protein                              | -3.74 |
| Mtr.5638.1.S1_at    | Hypothetical protein                              | -3.74 |
| Mtr.50799.1.S1_s_at | Cupredoxin                                        | -3.74 |
| Mtr.8778.1.S1_at    | Hypothetical protein                              | -3.74 |
| Mtr.13885.1.S1_at   | Actin-like protein                                | -3.74 |
| Mtr.40987.1.S1_at   | Hypothetical protein                              | -3.74 |
| Mtr.42200.1.S1_s_at | Protein kinase APK1B                              | -3.74 |
| Mtr.10186.1.S1_at   | Hypothetical protein                              | -3.74 |
| Mtr.42216.1.S1_at   | RanGAP1 interacting protein                       | -3.73 |
| Mtr.27440.1.S1_at   | Hypothetical protein                              | -3.73 |
| Mtr.23946.1.S1_at   | Receptor kinase                                   | -3.73 |

|                     |                                               |       |
|---------------------|-----------------------------------------------|-------|
| Mtr.11841.1.S1_at   | Lecithine cholesterol acyltransferase         | -3.73 |
| Mtr.13573.1.S1_at   | Cleavage stimulation factor 50K               | -3.73 |
| Mtr.39047.1.S1_at   | RNA helicase-like protein                     | -3.73 |
| Mtr.41057.1.S1_at   | Hypothetical protein                          | -3.73 |
| Mtr.48462.1.S1_s_at | Hypothetical protein                          | -3.73 |
| Mtr.22047.1.S1_at   | Hypothetical protein                          | -3.72 |
| Mtr.44031.1.S1_at   | Hypothetical protein                          | -3.72 |
| Mtr.2596.1.S1_at    | Protein kinase                                | -3.72 |
| Mtr.18659.1.S1_s_at | Hly-III related proteins                      | -3.72 |
| Mtr.18268.1.S1_at   | Serine/threonine protein kinase               | -3.72 |
| Mtr.45093.1.S1_at   | Beta-carotene hydroxylase                     | -3.72 |
| Mtr.8750.1.S1_at    | Homeobox protein knotted-1 like 3 (KNAP3)     | -3.72 |
| Mtr.1035.1.S1_at    | Heat shock protein                            | -3.72 |
| Mtr.44377.1.S1_at   | Ferric leghemoglobin reductase                | -3.72 |
| Mtr.23937.1.S1_at   | Hypothetical protein                          | -3.72 |
| Mtr.13194.1.S1_s_at | RanGAP1 interacting protein                   | -3.72 |
| Mtr.38268.1.S1_at   | Hypothetical protein                          | -3.72 |
| Mtr.27203.1.S1_at   | Hypothetical protein                          | -3.71 |
| Mtr.18673.1.S1_at   | Esterase/lipase/thioesterase                  | -3.71 |
| Mtr.40151.1.S1_at   | Cellulose synthase                            | -3.71 |
| Mtr.8220.1.S1_at    | Hypothetical protein                          | -3.71 |
| Msa.1378.1.S1_at    | Hypothetical protein                          | -3.71 |
| Mtr.37287.1.S1_s_at | Beta-glucosidase                              | -3.71 |
| Mtr.7932.1.S1_s_at  | Allyl alcohol dehydrogenase                   | -3.71 |
| Mtr.17456.1.S1_at   | Hypothetical protein                          | -3.71 |
| Mtr.19730.1.S1_at   | Microtubule-associated protein                | -3.70 |
| Mtr.6163.1.S1_at    | Hypothetical protein                          | -3.70 |
| Mtr.11277.1.S1_at   | Hydroxymethylglutaryl-CoA lyase               | -3.70 |
| Mtr.12978.1.S1_at   | 3-hydroxyisobutyrate dehydrogenase            | -3.70 |
| Msa.1654.1.S1_at    | Hypothetical protein                          | -3.70 |
| Mtr.44678.1.S1_at   | Hypothetical protein                          | -3.70 |
| Msa.1619.1.S1_at    | Hypothetical protein                          | -3.70 |
| Mtr.2656.1.S1_at    | Serine/threonine protein kinase               | -3.70 |
| Mtr.8254.1.S1_s_at  | Hypothetical protein                          | -3.70 |
| Msa.2287.1.S1_at    | Hypothetical protein                          | -3.69 |
| Mtr.16219.1.S1_at   | Zn-finger, B-box                              | -3.69 |
| Mtr.41837.1.S1_s_at | Hypothetical protein                          | -3.69 |
| Mtr.45013.1.S1_at   | Hypothetical protein                          | -3.69 |
| Mtr.34418.1.S1_at   | Hypothetical protein                          | -3.69 |
| Mtr.35108.1.S1_s_at | NAP                                           | -3.69 |
| Mtr.14257.1.S1_at   | Magnesium-protoporphyrin IX methyltransferase | -3.69 |
| Mtr.40395.1.S1_at   | MtN29 protein                                 | -3.69 |
| Mtr.37525.1.S1_at   | Multifunctional aquaporin                     | -3.69 |
| Mtr.38754.1.S1_at   | Chloride channel protein                      | -3.69 |
| Mtr.11364.1.S1_at   | Cytochrome P450                               | -3.69 |
| Mtr.40906.1.S1_at   | Quinone oxidoreductase                        | -3.68 |
| Mtr.15596.1.S1_at   | C2 calcium/lipid-binding protein              | -3.68 |
| Mtr.1902.1.S1_at    | Hypothetical protein                          | -3.68 |
| Mtr.41950.1.S1_at   | ABC transporter                               | -3.67 |
| Mtr.28056.1.S1_at   | Hypothetical protein                          | -3.67 |
| Mtr.8275.1.S1_at    | Calcium-transporting ATPase 9                 | -3.67 |
| Mtr.5622.1.S1_at    | Hypothetical protein                          | -3.67 |
| Mtr.28571.1.S1_at   | Phosphoribosylanthranilate transferase        | -3.67 |
| Mtr.35868.1.S1_at   | Hypothetical protein                          | -3.67 |

|                     |                                                        |       |
|---------------------|--------------------------------------------------------|-------|
| Mtr.9685.1.S1_at    | CAAX amino terminal protease                           | -3.67 |
| Mtr.2083.1.S1_s_at  | Glutamate decarboxylase 1                              | -3.67 |
| Mtr.8967.1.S1_s_at  | Hypothetical protein                                   | -3.67 |
| Mtr.44368.1.S1_at   | Hypothetical protein                                   | -3.67 |
| Mtr.50278.1.S1_s_at | Small GTP-binding protein                              | -3.66 |
| Mtr.42552.1.S1_at   | Anthocyanidin-3-glucoside rhamnosyltransferase         | -3.66 |
| Mtr.28405.1.S1_at   | General negative transcription regulator               | -3.66 |
| Mtr.23112.1.S1_at   | Chloride channel-like (CLC) protein                    | -3.66 |
| Mtr.13141.1.S1_at   | Chloroplast nucleoid DNA binding protein               | -3.66 |
| Mtr.44038.1.S1_at   | Hypothetical protein                                   | -3.65 |
| Mtr.11805.1.S1_at   | Hypothetical protein                                   | -3.65 |
| Mtr.27970.1.S1_at   | Hypothetical protein                                   | -3.65 |
| Mtr.23994.1.S1_at   | Homeodomain transcription factor                       | -3.65 |
| Mtr.9451.1.S1_at    | Hypothetical protein                                   | -3.65 |
| Mtr.12148.1.S1_s_at | Hypothetical protein                                   | -3.65 |
| Mtr.12741.1.S1_at   | Hypothetical protein                                   | -3.65 |
| Mtr.12001.1.S1_at   | Imidazole-4-carboxamide isomerase                      | -3.65 |
| Mtr.42432.1.S1_at   | Hypothetical protein                                   | -3.65 |
| Mtr.43748.1.S1_s_at | Hypothetical protein                                   | -3.65 |
| Mtr.19564.1.S1_s_at | Hypothetical protein                                   | -3.65 |
| Mtr.10321.1.S1_at   | Glycerophosphoryl diester phosphodiesterase 2          | -3.64 |
| Mtr.51597.1.S1_s_at | Hypothetical protein                                   | -3.64 |
| Mtr.29098.1.S1_at   | Long chain acyl-CoA synthetase 5                       | -3.64 |
| Mtr.712.1.S1_at     | Thioredoxin                                            | -3.64 |
| Mtr.33880.1.S1_s_at | Hypothetical protein                                   | -3.64 |
| Mtr.28688.1.S1_at   | Hypothetical protein                                   | -3.64 |
| Mtr.11631.1.S1_at   | Chloroplast alpha-glucan water dikinase                | -3.64 |
| Mtr.33457.1.S1_s_at | Galactinol synthase                                    | -3.64 |
| Mtr.13230.1.S1_at   | Glycosyl transferase                                   | -3.64 |
| Mtr.9018.1.S1_at    | Tic20                                                  | -3.63 |
| Mtr.38700.1.S1_at   | Hypothetical protein                                   | -3.63 |
| Mtr.35622.1.S1_at   | Hypothetical protein                                   | -3.63 |
| Mtr.41140.1.S1_at   | Hypothetical protein                                   | -3.63 |
| Mtr.38761.1.S1_s_at | Cell division protein FtsH-like                        | -3.63 |
| Mtr.49013.1.S1_at   | Hypothetical protein                                   | -3.63 |
| Mtr.6112.1.S1_at    | Cytochrome p450                                        | -3.63 |
| Mtr.36969.1.S1_at   | Beta-galactosidase                                     | -3.63 |
| Mtr.42232.1.S1_at   | Hypothetical protein                                   | -3.63 |
| Mtr.28232.1.S1_s_at | RNA helicase                                           | -3.63 |
| Mtr.6854.1.S1_at    | Two-component system sensor histidine kinase           | -3.63 |
| Mtr.10887.1.S1_at   | Hypothetical protein                                   | -3.63 |
| Mtr.12798.1.S1_at   | Benzoyl coenzyme A: benzyl alcohol benzoyl transferase | -3.63 |
| Mtr.785.1.S1_s_at   | Chloroplast initiation factor 3                        | -3.63 |
| Mtr.17598.1.S1_at   | Hypothetical protein                                   | -3.62 |
| Mtr.13200.1.S1_at   | Hypothetical protein                                   | -3.62 |
| Mtr.39445.1.S1_at   | Polygalacturonase isoenzyme 1 beta subunit             | -3.62 |
| Mtr.28068.1.S1_at   | Hypothetical protein                                   | -3.62 |
| Mtr.49845.1.S1_at   | Hypothetical protein                                   | -3.62 |
| Mtr.39696.1.S1_at   | Hypothetical protein                                   | -3.62 |
| Mtr.37613.1.S1_at   | Annexin-like protein                                   | -3.62 |
| Mtr.43677.1.S1_at   | 50S ribosomal protein L5                               | -3.61 |
| Mtr.9455.1.S1_at    | Hypothetical protein                                   | -3.61 |
| Mtr.35247.1.S1_at   | Aquaporin-like transmembrane channel protein           | -3.61 |
| Mtr.9554.1.S1_at    | Histone H4                                             | -3.61 |

|                     |                                                          |       |
|---------------------|----------------------------------------------------------|-------|
| Msa.1661.1.S1_s_at  | Hypothetical protein                                     | -3.61 |
| Mtr.5029.1.S1_at    | Hypothetical protein                                     | -3.60 |
| Mtr.30232.1.S1_at   | Hypothetical protein                                     | -3.60 |
| Mtr.38649.1.S1_at   | Seed maturation-like protein                             | -3.60 |
| Mtr.13889.1.S1_at   | Hypothetical protein                                     | -3.60 |
| Mtr.33046.1.S1_at   | Hypothetical protein                                     | -3.60 |
| Mtr.10065.1.S1_at   | Hypothetical protein                                     | -3.60 |
| Mtr.42344.1.S1_at   | Hypothetical protein                                     | -3.60 |
| Mtr.37359.1.S1_at   | 50S ribosomal protein L18                                | -3.60 |
| Mtr.4368.1.S1_at    | Light harvesting protein                                 | -3.59 |
| Msa.2822.1.S1_at    | Hypothetical protein                                     | -3.59 |
| Mtr.28082.1.S1_s_at | Hypothetical protein                                     | -3.59 |
| Mtr.45091.1.S1_at   | ABC transporter                                          | -3.59 |
| Mtr.10403.1.S1_at   | Photosystem I reaction center subunit IV A               | -3.59 |
| Mtr.48199.1.S1_at   | Hypothetical protein                                     | -3.59 |
| Mtr.40397.1.S1_at   | Cytochrome P450 78A3                                     | -3.59 |
| Mtr.2204.1.S1_at    | Hypothetical protein                                     | -3.59 |
| Mtr.6937.1.S1_at    | Hypothetical protein                                     | -3.59 |
| Mtr.45509.1.S1_at   | Hypothetical protein                                     | -3.59 |
| Mtr.47145.1.S1_at   | C2H2-type zinc finger protein                            | -3.59 |
| Mtr.11444.1.S1_at   | Receptor-like protein kinase                             | -3.59 |
| Mtr.7796.1.S1_at    | Hypothetical protein                                     | -3.58 |
| Mtr.11994.1.S1_at   | ABC transporter                                          | -3.58 |
| Mtr.2197.1.S1_at    | Hypothetical protein                                     | -3.58 |
| Mtr.12080.1.S1_s_at | Hypothetical protein                                     | -3.58 |
| Msa.2137.1.S1_at    | Hypothetical protein                                     | -3.58 |
| Mtr.28234.1.S1_at   | Hypothetical protein                                     | -3.58 |
| Mtr.14574.1.S1_at   | Syntaxin                                                 | -3.58 |
| Mtr.44971.1.S1_at   | Hypothetical protein                                     | -3.57 |
| Mtr.7450.1.S1_at    | Hypothetical protein                                     | -3.57 |
| Mtr.13869.1.S1_at   | Calcium-activated outward-rectifying potassium channel 5 | -3.57 |
| Mtr.45329.1.S1_at   | Protein kinase                                           | -3.57 |
| Mtr.43925.1.S1_at   | Histone H2A                                              | -3.57 |
| Mtr.43749.1.S1_at   | Hypothetical protein                                     | -3.57 |
| Mtr.9855.1.S1_at    | Hypothetical protein                                     | -3.57 |
| Mtr.45240.1.S1_at   | Hypothetical protein                                     | -3.56 |
| Mtr.34726.1.S1_at   | Photosystem I reaction center subunit II                 | -3.56 |
| Mtr.41782.1.S1_at   | Hypothetical protein                                     | -3.56 |
| Mtr.44813.1.S1_at   | Aromatic rich glycoprotein                               | -3.56 |
| Mtr.10412.1.S1_at   | Oxygen-evolving enhancer protein 3                       | -3.56 |
| Mtr.22161.1.S1_at   | Hypothetical protein                                     | -3.56 |
| Mtr.4282.1.S1_at    | HAP3-like transcriptional-activator                      | -3.56 |
| Mtr.29292.1.S1_at   | Hypothetical protein                                     | -3.56 |
| Mtr.16358.1.S1_at   | Glyoxalase/extradiol ring-cleavage dioxygenase           | -3.55 |
| Mtr.5808.1.S1_at    | UDP-glycosyltransferase 89B2                             | -3.55 |
| Mtr.33744.1.S1_s_at | Hypothetical protein                                     | -3.55 |
| Mtr.5919.1.S1_at    | Hypothetical protein                                     | -3.55 |
| Mtr.49327.1.S1_at   | Hypothetical protein                                     | -3.55 |
| Mtr.42606.1.S1_at   | Hypothetical protein                                     | -3.54 |
| Mtr.10826.1.S1_at   | Rho GDP dissociation inhibitor 1, complete               | -3.54 |
| Mtr.25077.1.S1_at   | Hypothetical protein                                     | -3.54 |
| Mtr.9877.1.S1_at    | Short-chain dehydrogenase/reductase                      | -3.54 |
| Mtr.20947.1.S1_at   | Serine/threonine protein kinase                          | -3.54 |
| Mtr.39345.1.S1_at   | Oligopeptidase B                                         | -3.54 |

|                     |                                                  |       |
|---------------------|--------------------------------------------------|-------|
| Mtr.11785.1.S1_at   | Hypothetical protein                             | -3.54 |
| Mtr.42121.1.S1_at   | 1-aminocyclopropane-1-carboxylate synthase       | -3.54 |
| Mtr.13372.1.S1_at   | Hypothetical protein                             | -3.53 |
| Mtr.152.1.S1_at     | Vestitone reductase                              | -3.53 |
| Mtr.36792.1.S1_at   | Hypothetical protein                             | -3.53 |
| Mtr.18262.1.S1_at   | Hypothetical protein                             | -3.53 |
| Mtr.28569.1.S1_s_at | Remorin                                          | -3.53 |
| Mtr.9163.1.S1_at    | Hypothetical protein                             | -3.53 |
| Mtr.12805.1.S1_at   | Hypothetical protein                             | -3.53 |
| Mtr.784.1.S1_s_at   | Translation initiation factor                    | -3.53 |
| Mtr.13736.1.S1_at   | Senescence-associated protein SAG102             | -3.53 |
| Mtr.37692.1.S1_at   | Glutathione-dependent formaldehyde dehydrogenase | -3.52 |
| Mtr.8848.1.S1_at    | Alpha-xylosidase                                 | -3.52 |
| Mtr.41151.1.S1_at   | Cer2 protein                                     | -3.52 |
| Mtr.14183.1.S1_at   | Annexin                                          | -3.52 |
| Msa.1301.1.S1_at    | Hypothetical protein                             | -3.52 |
| Mtr.40863.1.S1_at   | Hypothetical protein                             | -3.52 |
| Mtr.43488.1.S1_at   | Hypothetical protein                             | -3.51 |
| Mtr.5041.1.S1_s_at  | Alcohol dehydrogenase 1                          | -3.51 |
| Mtr.36992.1.S1_at   | Seed maturation-like protein                     | -3.51 |
| Msa.1697.1.S1_at    | Hypothetical protein                             | -3.51 |
| Mtr.25499.1.S1_s_at | NifU-related metallocluster assembly factor      | -3.51 |
| Mtr.12375.1.S1_at   | Photosystem I reaction center subunit III        | -3.51 |
| Mtr.46659.1.S1_at   | Hypothetical protein                             | -3.51 |
| Mtr.18628.1.S1_at   | Lipid-binding START                              | -3.51 |
| Mtr.9599.1.S1_at    | Hypothetical protein                             | -3.51 |
| Msa.3017.1.S1_at    | Hypothetical protein                             | -3.51 |
| Mtr.27391.1.S1_at   | N-acylethanolamine amidohydrolase                | -3.51 |
| Mtr.32192.1.S1_at   | Hypothetical protein                             | -3.50 |
| Mtr.50756.1.S1_at   | Hypothetical protein                             | -3.50 |
| Mtr.6108.1.S1_at    | Hypothetical protein                             | -3.50 |
| Mtr.11148.1.S1_at   | Multi resistance protein                         | -3.50 |
| Mtr.38545.1.S1_s_at | Kinesin 1 (Kinesin-like protein A)               | -3.50 |
| Mtr.40247.1.S1_at   | Salicylic acid glucosyltransferase               | -3.50 |
| Mtr.42622.1.S1_at   | Maturase                                         | -3.50 |
| Mtr.43815.1.S1_at   | Hypothetical protein                             | -3.49 |
| Msa.1941.1.S1_at    | Hypothetical protein                             | -3.48 |
| Mtr.37355.1.S1_at   | GAI-like protein                                 | -3.48 |
| Mtr.15042.1.S1_at   | Histidine kinase A                               | -3.48 |
| Mtr.27421.1.S1_s_at | NADPH HC toxin reductase                         | -3.48 |
| Mtr.26358.1.S1_at   | Hypothetical protein                             | -3.48 |
| Mtr.20815.1.S1_at   | Hypothetical protein                             | -3.48 |
| Mtr.31577.1.S1_at   | Imidazole-4-carboxamide isomerase                | -3.48 |
| Mtr.29219.1.S1_at   | Alcohol oxidase                                  | -3.48 |
| Mtr.39786.1.S1_at   | Beta-carotene hydroxylase                        | -3.48 |
| Mtr.40922.1.S1_at   | Hypothetical protein                             | -3.48 |
| Mtr.38947.1.S1_s_at | Hypothetical protein                             | -3.48 |
| Mtr.41644.1.S1_at   | Hypothetical protein                             | -3.48 |
| Mtr.7486.1.S1_s_at  | Zinc finger protein                              | -3.47 |
| Mtr.41014.1.S1_at   | Hypothetical protein                             | -3.47 |
| Mtr.13136.1.S1_at   | Fasciclin-like AGP 10                            | -3.47 |
| Mtr.12218.1.S1_at   | Cytochrome B6-F complex iron-sulfur subunit      | -3.47 |
| Mtr.25643.1.S1_at   | B-type cyclin                                    | -3.47 |
| Mtr.45352.1.S1_s_at | Glutathione transporter                          | -3.47 |

|                     |                                                      |       |
|---------------------|------------------------------------------------------|-------|
| Mtr.42446.1.S1_at   | Nitrate reductase                                    | -3.47 |
| Mtr.43423.1.S1_at   | Hypothetical protein                                 | -3.47 |
| Msa.2836.1.S1_at    | Hypothetical protein                                 | -3.47 |
| Mtr.5291.1.S1_at    | Hypothetical protein                                 | -3.47 |
| Mtr.10483.1.S1_at   | Esterase D                                           | -3.47 |
| Mtr.8265.1.S1_at    | Pectinacetylerase-like protein                       | -3.47 |
| Mtr.37908.1.S1_at   | Peroxidase                                           | -3.47 |
| Mtr.16086.1.S1_at   | Hypothetical protein                                 | -3.47 |
| Mtr.39543.1.S1_at   | DNAJ heat shock N-terminal domain-containing protein | -3.46 |
| Msa.926.1.S1_at     | Hypothetical protein                                 | -3.46 |
| Mtr.33025.1.S1_s_at | Salt-inducible protein                               | -3.46 |
| Mtr.28642.1.S1_at   | Hypothetical protein                                 | -3.46 |
| Mtr.5862.1.S1_at    | Photosystem II 22 kDa protein                        | -3.46 |
| Mtr.45513.1.S1_at   | Hypothetical protein                                 | -3.46 |
| Mtr.13209.1.S1_at   | Hypothetical protein                                 | -3.46 |
| Mtr.26048.1.S1_at   | Hypothetical protein                                 | -3.46 |
| Mtr.31119.1.S1_at   | MRP-like ABC transporter                             | -3.46 |
| Mtr.23330.1.S1_at   | Mitochondrial carrier protein                        | -3.46 |
| Mtr.29047.1.S1_at   | Hypothetical protein                                 | -3.45 |
| Mtr.831.1.S1_at     | Hypothetical protein                                 | -3.45 |
| Mtr.27418.1.S1_at   | Hypothetical protein                                 | -3.45 |
| Mtr.27110.1.S1_at   | C2 domain-containing protein                         | -3.45 |
| Mtr.31536.1.S1_at   | Hypothetical protein                                 | -3.45 |
| Mtr.29088.1.S1_at   | Hypothetical protein                                 | -3.45 |
| Mtr.13378.1.S1_at   | Zinc finger protein 4                                | -3.45 |
| Mtr.6912.1.S1_at    | Hypothetical protein                                 | -3.45 |
| Mtr.45252.1.S1_s_at | Calcium-binding protein CAST                         | -3.44 |
| Mtr.8870.1.S1_at    | Cytochrome P450 monooxygenase                        | -3.44 |
| Mtr.2599.1.S1_at    | Hypothetical protein                                 | -3.44 |
| Mtr.43402.1.S1_at   | Ankyrin-like protein                                 | -3.44 |
| Mtr.19917.1.S1_at   | Auxin responsive SAUR                                | -3.44 |
| Mtr.38020.1.S1_at   | Monodehydroascorbate reductase                       | -3.44 |
| Mtr.8839.1.S1_at    | Gamma-tocopherol methyltransferase                   | -3.44 |
| Mtr.13551.1.S1_at   | mRNA cleavage factor subunit                         | -3.44 |
| Mtr.27901.1.S1_at   | Hypothetical protein                                 | -3.44 |
| Mtr.13256.1.S1_at   | Protein phosphatase-2C                               | -3.44 |
| Mtr.7496.1.S1_at    | Hypothetical protein                                 | -3.43 |
| Mtr.16049.1.S1_at   | Hypothetical protein                                 | -3.43 |
| Mtr.32484.1.S1_at   | Hypothetical protein                                 | -3.43 |
| Mtr.41768.1.S1_at   | Verticillium wilt disease resistance protein         | -3.43 |
| Mtr.44814.1.S1_at   | Ycf49-like protein                                   | -3.42 |
| Mtr.44526.1.S1_at   | Hypothetical protein                                 | -3.42 |
| Mtr.9363.1.S1_s_at  | Diphosphonucleotide phosphatase                      | -3.42 |
| Mtr.24519.1.S1_at   | Globulin-like protein                                | -3.42 |
| Mtr.36341.1.S1_s_at | Tetracycline transporter protein                     | -3.42 |
| Mtr.15511.1.S1_at   | Hypothetical protein                                 | -3.42 |
| Mtr.15646.1.S1_at   | Hypothetical protein                                 | -3.42 |
| Mtr.28982.1.S1_at   | Hypothetical protein                                 | -3.42 |
| Msa.1025.1.S1_at    | Hypothetical protein                                 | -3.42 |
| Mtr.2226.1.S1_at    | Hypothetical protein                                 | -3.42 |
| Mtr.44853.1.S1_at   | Constitutively photomorphogenic 1 protein            | -3.41 |
| Mtr.39493.1.S1_at   | Squamosa promoter binding protein                    | -3.41 |
| Mtr.37597.1.S1_s_at | Hypothetical protein                                 | -3.41 |
| Mtr.22801.1.S1_at   | Polynucleotide phosphorylase                         | -3.41 |



|                     |                                                 |       |
|---------------------|-------------------------------------------------|-------|
| Mtr.7841.1.S1_at    | Hypothetical protein                            | -3.41 |
| Mtr.27040.1.S1_s_at | Hypothetical protein                            | -3.41 |
| Mtr.41982.1.S1_at   | Sulfate transporter ATST1                       | -3.41 |
| Mtr.18250.1.S1_at   | Nuclear protein SET                             | -3.41 |
| Mtr.10608.1.S1_at   | Glutamine cyclotransferase                      | -3.41 |
| Mtr.43427.1.S1_at   | Hypothetical protein                            | -3.41 |
| Mtr.52183.1.S1_at   | Concanavalin A-like lectin                      | -3.41 |
| Mtr.34788.1.S1_at   | Glyceraldehyde-3-phosphate dehydrogenase        | -3.40 |
| Mtr.40458.1.S1_at   | Hypothetical protein                            | -3.40 |
| Mtr.12262.1.S1_at   | Extensin                                        | -3.40 |
| Mtr.39936.1.S1_at   | Spermidine synthase 2                           | -3.40 |
| Mtr.13189.1.S1_at   | Hypothetical protein                            | -3.40 |
| Msa.1600.1.S1_at    | Hypothetical protein                            | -3.40 |
| Mtr.13662.1.S1_s_at | Protein kinase                                  | -3.40 |
| Mtr.50467.1.S1_at   | Serine/threonine protein kinase                 | -3.40 |
| Mtr.43891.1.S1_at   | Hypothetical protein                            | -3.40 |
| Mtr.27411.1.S1_s_at | Ribonucleoprotein                               | -3.40 |
| Mtr.38333.1.S1_at   | Hypothetical protein                            | -3.40 |
| Msa.3107.1.S1_at    | Hypothetical protein                            | -3.39 |
| Mtr.49166.1.S1_at   | Short-chain dehydrogenase/reductase             | -3.39 |
| Mtr.20335.1.S1_at   | Pectin acetyltransferase                        | -3.39 |
| Mtr.25320.1.S1_at   | Hypothetical protein                            | -3.39 |
| Mtr.38913.1.S1_at   | Hypothetical protein                            | -3.39 |
| Mtr.32078.1.S1_at   | Hypothetical protein                            | -3.39 |
| Mtr.8418.1.S1_at    | Xylulose kinase                                 | -3.39 |
| Mtr.38132.1.S1_a_at | Homeobox 2 protein                              | -3.39 |
| Mtr.20398.1.S1_at   | Hypothetical protein                            | -3.38 |
| Mtr.18268.1.S1_s_at | Serine/threonine protein kinase                 | -3.38 |
| Mtr.19083.1.S1_at   | ABC transporter                                 | -3.38 |
| Mtr.24082.1.S1_at   | Haloacid dehalogenase-like hydrolase            | -3.38 |
| Mtr.11510.1.S1_at   | Hypothetical protein                            | -3.38 |
| Mtr.20332.1.S1_at   | Pectin acetyltransferase                        | -3.38 |
| Mtr.33744.1.S1_at   | Hypothetical protein                            | -3.38 |
| Mtr.37742.1.S1_s_at | Methionine sulfoxide reductase A                | -3.38 |
| Mtr.44708.1.S1_at   | Hypothetical protein                            | -3.38 |
| Mtr.28673.1.S1_at   | Hypothetical protein                            | -3.37 |
| Mtr.42768.1.S1_at   | Fasciclin-like arabinogalactan protein 1        | -3.37 |
| Mtr.2081.1.S1_at    | Hypothetical protein                            | -3.37 |
| Mtr.35648.1.S1_at   | bHLH transcription factor                       | -3.37 |
| Mtr.41025.1.S1_at   | Hypothetical protein                            | -3.37 |
| Mtr.46334.1.S1_at   | Serine/threonine protein kinase                 | -3.37 |
| Mtr.17396.1.S1_s_at | Cellulose synthase                              | -3.37 |
| Mtr.41183.1.S1_at   | Growth regulator-related protein                | -3.36 |
| Mtr.5178.1.S1_s_at  | Hydroxyisourate hydrolase                       | -3.36 |
| Mtr.32826.1.S1_at   | Hypothetical protein                            | -3.36 |
| Mtr.17339.1.S1_at   | 50s ribosomal protein 118                       | -3.36 |
| Msa.2895.1.S1_at    | Hypothetical protein                            | -3.36 |
| Mtr.39076.1.S1_at   | Hypothetical protein                            | -3.36 |
| Mtr.36865.1.S1_s_at | Hypothetical protein                            | -3.36 |
| Mtr.52115.1.S1_s_at | Hypothetical protein                            | -3.35 |
| Mtr.41659.1.S1_at   | Chloroplast carotenoid epsilon-ring hydroxylase | -3.35 |
| Mtr.20939.1.S1_at   | Hypothetical protein                            | -3.35 |
| Mtr.45091.1.S1_x_at | ABC transporter                                 | -3.35 |
| Mtr.41480.1.S1_at   | Polygalacturonase isoenzyme 1 beta subunit      | -3.35 |

|                     |                                                     |       |
|---------------------|-----------------------------------------------------|-------|
| Mtr.9768.1.S1_at    | Hypothetical protein                                | -3.35 |
| Mtr.47251.1.S1_at   | Hypothetical protein                                | -3.35 |
| Mtr.9109.1.S1_at    | Paa2 P-type ATPase                                  | -3.34 |
| Mtr.16766.1.S1_at   | Hypothetical protein                                | -3.34 |
| Mtr.9284.1.S1_at    | Hypothetical protein                                | -3.34 |
| Mtr.8249.1.S1_at    | Hypothetical protein                                | -3.34 |
| Mtr.5545.1.S1_at    | Hypothetical protein                                | -3.34 |
| Mtr.46514.1.S1_s_at | Alpha/beta-amyrin synthase                          | -3.34 |
| Mtr.22379.1.S1_s_at | Hypothetical protein                                | -3.34 |
| Mtr.26297.1.S1_at   | Hypothetical protein                                | -3.34 |
| Mtr.20499.1.S1_at   | Phosphatidylinositol-4-phosphate 5-kinase           | -3.34 |
| Mtr.29161.1.S1_at   | Serine/threonine protein kinase                     | -3.34 |
| Mtr.8916.1.S1_at    | Farnesylated protein ATFP6                          | -3.34 |
| Mtr.44868.1.S1_at   | UPF0187 protein                                     | -3.34 |
| Mtr.14636.1.S1_s_at | RNA polymerase beta subunit                         | -3.34 |
| Mtr.18807.1.S1_at   | Flavoprotein monooxygenase                          | -3.34 |
| Mtr.29418.1.S1_at   | Hypothetical protein                                | -3.33 |
| Mtr.10265.1.S1_at   | Hydrolase-like protein                              | -3.33 |
| Mtr.9521.1.S1_at    | Hypothetical protein                                | -3.33 |
| Mtr.40864.1.S1_at   | Acyl-peptide hydrolase                              | -3.33 |
| Mtr.32688.1.S1_at   | Hypothetical protein                                | -3.33 |
| Mtr.13826.1.S1_at   | Hypothetical protein                                | -3.33 |
| Mtr.50411.1.S1_at   | DNA glycosylase                                     | -3.32 |
| Mtr.42285.1.S1_at   | Phosphoglycerate mutase                             | -3.32 |
| Mtr.21612.1.S1_at   | Hypothetical protein                                | -3.32 |
| Mtr.4733.1.S1_s_at  | Peroxidase                                          | -3.32 |
| Mtr.48816.1.S1_at   | Phosphoglycerate mutase                             | -3.32 |
| Mtr.6710.1.S1_at    | MYB transcription factor                            | -3.32 |
| Mtr.28728.1.S1_at   | Hypothetical protein                                | -3.32 |
| Mtr.34205.1.S1_at   | Hypothetical protein                                | -3.32 |
| Mtr.24581.1.S1_s_at | 1,2-diacylglycerol 3-beta-galactosyltransferase     | -3.31 |
| Mtr.36800.1.S1_at   | Elicitor-inducible LRR receptor-like protein EILP   | -3.31 |
| Mtr.9816.1.S1_at    | Hypothetical protein                                | -3.31 |
| Mtr.49018.1.S1_at   | 30S ribosomal protein S31                           | -3.31 |
| Mtr.38346.1.S1_at   | Hypothetical protein                                | -3.31 |
| Mtr.12206.1.S1_at   | Ribulose 1,7-bisphosphate carboxylase small subunit | -3.31 |
| Mtr.38925.1.S1_s_at | Hypothetical protein                                | -3.31 |
| Mtr.45380.1.S1_at   | Hypothetical protein                                | -3.31 |
| Mtr.41803.1.S1_at   | Hypothetical protein                                | -3.31 |
| Mtr.39136.1.S1_at   | Hypothetical protein                                | -3.31 |
| Mtr.15660.1.S1_at   | Peptidase M                                         | -3.31 |
| Mtr.5617.1.S1_at    | Hypothetical protein                                | -3.31 |
| Mtr.11306.1.S1_at   | ATP-dependent RNA helicase                          | -3.31 |
| Mtr.46678.1.S1_at   | Metalloprotease                                     | -3.30 |
| Mtr.6340.1.S1_at    | Cyclic nucleotide-gated ion channel 2               | -3.30 |
| Mtr.50484.1.S1_s_at | Aminopeptidase                                      | -3.30 |
| Mtr.33344.1.S1_at   | Disease resistance protein                          | -3.30 |
| Mtr.44447.1.S1_at   | Hypothetical protein                                | -3.30 |
| Mtr.23748.1.S1_s_at | C3HC4-type zinc finger protein                      | -3.30 |
| Mtr.37988.1.S1_at   | Hypothetical protein                                | -3.30 |
| Mtr.36764.1.S1_at   | Photosystem I psaH protein                          | -3.30 |
| Mtr.26951.1.S1_at   | Hypothetical protein                                | -3.30 |
| Mtr.13927.1.S1_at   | Hypothetical protein                                | -3.30 |
| Mtr.13163.1.S1_at   | Hypothetical protein                                | -3.30 |

|                     |                                                   |       |
|---------------------|---------------------------------------------------|-------|
| Mtr.40495.1.S1_at   | Beta-mannosidase                                  | -3.30 |
| Mtr.21822.1.S1_at   | Hypothetical protein                              | -3.29 |
| Mtr.45146.1.S1_at   | Apolipoprotein D                                  | -3.29 |
| Mtr.6831.1.S1_at    | UDP-glucose glucosyltransferase                   | -3.29 |
| Mtr.15888.1.S1_at   | Serine/threonine protein kinase                   | -3.29 |
| Mtr.8503.1.S1_at    | Photosystem II reaction center W protein          | -3.29 |
| Msa.1784.1.S1_at    | Hypothetical protein                              | -3.29 |
| Mtr.21944.1.S1_s_at | CYP83D1p                                          | -3.29 |
| Mtr.27607.1.S1_at   | Hypothetical protein                              | -3.29 |
| Mtr.4623.1.S1_at    | WRKY transcription factor 32                      | -3.29 |
| Mtr.8748.1.S1_at    | Methionine synthase                               | -3.29 |
| Mtr.11113.1.S1_at   | Hypothetical protein                              | -3.29 |
| Mtr.18240.1.S1_at   | Auxin responsive SAUR protein                     | -3.28 |
| Msa.1757.1.S1_at    | Hypothetical protein                              | -3.28 |
| Mtr.6734.1.S1_s_at  | Hypothetical protein                              | -3.28 |
| Mtr.50173.1.S1_at   | Hypothetical protein                              | -3.28 |
| Mtr.39618.1.S1_at   | Prolyl tRNA synthetase                            | -3.28 |
| Mtr.36351.1.S1_at   | Cytochrome oxidase II                             | -3.28 |
| Mtr.50819.1.S1_s_at | Hypothetical protein                              | -3.28 |
| Mtr.40199.1.S1_at   | Hypothetical protein                              | -3.28 |
| Mtr.44644.1.S1_s_at | Hydrolase                                         | -3.28 |
| Mtr.18574.1.S1_at   | 3,4-Dihydroxy-2-butanone 4-phosphate synthase     | -3.28 |
| Mtr.38216.1.S1_at   | Hypothetical protein                              | -3.28 |
| Msa.897.1.S1_s_at   | Hypothetical protein                              | -3.28 |
| Mtr.2306.1.S1_at    | Trehalose-6-phosphate phosphatase                 | -3.28 |
| Mtr.6063.1.S1_at    | Glucosyltransferase                               | -3.27 |
| Mtr.48824.1.S1_at   | tRNA isopentenyltransferase                       | -3.27 |
| Mtr.11718.1.S1_at   | Hypothetical protein                              | -3.27 |
| Mtr.15765.1.S1_at   | Hypothetical protein                              | -3.27 |
| Mtr.10428.1.S1_at   | NADP-specific isocitrate dehydrogenase            | -3.27 |
| Mtr.23750.1.S1_at   | Hypothetical protein                              | -3.27 |
| Mtr.10009.1.S1_at   | Hypothetical protein                              | -3.27 |
| Mtr.35064.1.S1_at   | Cucumis-like serine protease                      | -3.27 |
| Mtr.8663.1.S1_at    | Calcium/calmodulin-dependent protein kinase CaMK3 | -3.26 |
| Mtr.27917.1.S1_s_at | Yippee-like protein                               | -3.26 |
| Mtr.8330.1.S1_at    | Hypothetical protein                              | -3.26 |
| Mtr.25726.1.S1_s_at | Hypothetical protein                              | -3.26 |
| Mtr.40716.1.S1_at   | WAP four-disulfide core domain protein 1          | -3.26 |
| Mtr.5818.1.S1_at    | Myosin heavy chain                                | -3.25 |
| Mtr.9004.1.S1_at    | Hypothetical protein                              | -3.25 |
| Mtr.11205.1.S1_at   | Hypothetical protein                              | -3.25 |
| Mtr.39292.1.S1_at   | Hypothetical protein                              | -3.25 |
| Mtr.28150.1.S1_at   | Recombination protein                             | -3.24 |
| Mtr.41696.1.S1_at   | Hypothetical protein                              | -3.24 |
| Mtr.6192.1.S1_at    | Hypothetical protein                              | -3.24 |
| Msa.2547.1.S1_at    | Hypothetical protein                              | -3.23 |
| Mtr.25499.1.S1_at   | NifU-related metallocluster assembly factor       | -3.23 |
| Mtr.15297.1.S1_at   | Hypothetical protein                              | -3.23 |
| Mtr.35461.1.S1_at   | Hypothetical protein                              | -3.23 |
| Mtr.12327.1.S1_at   | Late embryogenesis abundant protein               | -3.23 |
| Mtr.6371.1.S1_s_at  | GDSL-motif lipase/hydrolase-like protein          | -3.23 |
| Mtr.37336.1.S1_at   | RNA-binding protein 2                             | -3.23 |
| Mtr.13351.1.S1_at   | ABC transporter                                   | -3.23 |
| Mtr.33858.1.S1_at   | Metal-transporting P-type ATPase                  | -3.23 |

|                     |                                                 |       |
|---------------------|-------------------------------------------------|-------|
| Mtr.9332.1.S1_at    | Hypothetical protein                            | -3.23 |
| Mtr.43439.1.S1_at   | Hypothetical protein                            | -3.23 |
| Mtr.51065.1.S1_at   | Cytochrome P450                                 | -3.22 |
| Mtr.35998.1.S1_at   | Cinnamoyl-CoA reductase                         | -3.22 |
| Msa.1840.1.S1_at    | Hypothetical protein                            | -3.22 |
| Mtr.618.1.S1_s_at   | Hypothetical protein                            | -3.22 |
| Mtr.15378.1.S1_at   | Hypothetical protein                            | -3.22 |
| Mtr.28621.1.S1_at   | Hypothetical protein                            | -3.22 |
| Mtr.12179.1.S1_at   | Hypothetical protein                            | -3.22 |
| Mtr.51607.1.S1_at   | Beta-Ig-H3/fasciclin                            | -3.22 |
| Msa.1262.1.S1_at    | Hypothetical protein                            | -3.22 |
| Mtr.5617.1.S1_s_at  | Hypothetical protein                            | -3.22 |
| Mtr.42030.1.S1_at   | Hypothetical protein                            | -3.21 |
| Mtr.12953.1.S1_at   | Hydroperoxide lyase                             | -3.21 |
| Mtr.10790.1.S1_at   | Lysosomal Pro-X carboxypeptidase                | -3.21 |
| Msa.2936.1.S1_at    | Hypothetical protein                            | -3.21 |
| Mtr.46674.1.S1_at   | Hypothetical protein                            | -3.21 |
| Mtr.11230.1.S1_at   | Laccase (Diphenol oxidase)                      | -3.21 |
| Mtr.34132.1.S1_s_at | Hypothetical protein                            | -3.21 |
| Mtr.29554.1.S1_s_at | Hypothetical protein                            | -3.21 |
| Mtr.42619.1.S1_at   | Hypothetical protein                            | -3.21 |
| Mtr.16219.1.S1_s_at | Zn-finger, B-box                                | -3.21 |
| Mtr.50233.1.S1_at   | Initiation factor 3                             | -3.21 |
| Msa.1448.1.S1_at    | Hypothetical protein                            | -3.21 |
| Mtr.28077.1.S1_at   | Hypothetical protein                            | -3.20 |
| Mtr.17048.1.S1_at   | Metallo-dependent hydrolase                     | -3.20 |
| Msa.1148.1.S1_at    | Hypothetical protein                            | -3.20 |
| Mtr.36413.1.S1_at   | Hypothetical protein                            | -3.20 |
| Mtr.41476.1.S1_at   | Cytochrome P450 71D11                           | -3.20 |
| Mtr.41933.1.S1_at   | Hypothetical protein                            | -3.20 |
| Mtr.44149.1.S1_at   | Aquaporin                                       | -3.20 |
| Mtr.24954.1.S1_s_at | Protein kinase                                  | -3.20 |
| Mtr.5133.1.S1_at    | Hypothetical protein                            | -3.19 |
| Mtr.41953.1.S1_at   | Hypothetical protein                            | -3.19 |
| Mtr.40105.1.S1_at   | Hypothetical protein                            | -3.19 |
| Mtr.41929.1.S1_at   | Phenylalanine-tRNA synthetase                   | -3.19 |
| Mtr.12473.1.S1_at   | Isoflavonoid glucosyltransferase                | -3.19 |
| Mtr.24881.1.S1_at   | Hypothetical protein                            | -3.19 |
| Mtr.33445.1.S1_at   | Plakoglobin/armadillo/beta-catenin-like protein | -3.19 |
| Mtr.26216.1.S1_at   | Auxin response factor 5                         | -3.19 |
| Msa.2619.1.S1_at    | Hypothetical protein                            | -3.19 |
| Mtr.40237.1.S1_at   | Hypothetical protein                            | -3.19 |
| Mtr.34826.1.S1_at   | Hypothetical protein                            | -3.19 |
| Mtr.7486.1.S1_at    | Zinc finger protein                             | -3.19 |
| Mtr.38545.1.S1_at   | Kinesin 1 (Kinesin-like protein A)              | -3.18 |
| Mtr.43725.1.S1_at   | 50S ribosomal protein L24                       | -3.18 |
| Mtr.29445.1.S1_at   | Hypothetical protein                            | -3.18 |
| Mtr.40545.1.S1_at   | HSP associated protein                          | -3.18 |
| Mtr.38127.1.S1_at   | Hypothetical protein                            | -3.18 |
| Mtr.10170.1.S1_at   | Hypothetical protein                            | -3.18 |
| Msa.3012.1.S1_at    | Hypothetical protein                            | -3.18 |
| Mtr.29302.1.S1_at   | Hypothetical protein                            | -3.18 |
| Mtr.16385.1.S1_s_at | Hypothetical protein                            | -3.17 |
| Mtr.36189.1.S1_at   | Hypothetical protein                            | -3.17 |

|                     |                                                        |       |
|---------------------|--------------------------------------------------------|-------|
| Mtr.42744.1.S1_at   | Hypothetical protein                                   | -3.17 |
| Mtr.12714.1.S1_at   | Hypothetical protein                                   | -3.17 |
| Mtr.51453.1.S1_at   | Hypothetical protein                                   | -3.17 |
| Mtr.41113.1.S1_at   | Lectin-like receptor kinase                            | -3.17 |
| Mtr.15800.1.S1_s_at | Zn-binding protein                                     | -3.17 |
| Mtr.48940.1.S1_at   | Protein phosphatase 2C                                 | -3.17 |
| Mtr.6056.1.S1_at    | Serine protease                                        | -3.17 |
| Mtr.41264.1.S1_at   | Zinc finger protein                                    | -3.17 |
| Mtr.12701.1.S1_at   | Om(1E) protein                                         | -3.17 |
| Mtr.48366.1.S1_at   | Hypothetical protein                                   | -3.17 |
| Mtr.15000.1.S1_at   | Transferase                                            | -3.17 |
| Mtr.15932.1.S1_at   | Hypothetical protein                                   | -3.17 |
| Mtr.43458.1.S1_s_at | Hypothetical protein                                   | -3.16 |
| Mtr.30783.1.S1_at   | Cytochrome P450                                        | -3.16 |
| Mtr.33076.1.S1_at   | Actin binding protein                                  | -3.16 |
| Msa.1681.1.S1_at    | Hypothetical protein                                   | -3.16 |
| Mtr.41315.1.S1_at   | Mechanosensitive ion channel domain-containing protein | -3.16 |
| Mtr.11805.1.S1_s_at | Hypothetical protein                                   | -3.16 |
| Msa.2543.1.S1_at    | Hypothetical protein                                   | -3.16 |
| Mtr.38498.1.S1_at   | Mitochondrial transcription termination factor         | -3.16 |
| Mtr.32433.1.S1_at   | Aminotransferase ACS10                                 | -3.16 |
| Mtr.40894.1.S1_at   | SF16 protein                                           | -3.15 |
| Mtr.25541.1.S1_at   | Hypothetical protein                                   | -3.15 |
| Mtr.48305.1.S1_x_at | Hypothetical protein                                   | -3.15 |
| Mtr.13460.1.S1_at   | Chloroplast ribosomal protein L10                      | -3.15 |
| Mtr.6127.1.S1_s_at  | ADP-ribosylation factor                                | -3.15 |
| Mtr.41083.1.S1_at   | Hypothetical protein                                   | -3.15 |
| Mtr.41620.1.S1_at   | Hypothetical protein                                   | -3.15 |
| Mtr.43742.1.S1_at   | bZIP protein BZO2H2                                    | -3.15 |
| Mtr.41201.1.S1_at   | 50S ribosomal protein L28                              | -3.15 |
| Mtr.50620.1.S1_at   | 16S rRNA processing protein RimM                       | -3.15 |
| Mtr.8568.1.S1_at    | Nitrite reductase                                      | -3.14 |
| Msa.1329.1.S1_at    | Hypothetical protein                                   | -3.14 |
| Mtr.8500.1.S1_at    | Hypothetical protein                                   | -3.14 |
| Mtr.41658.1.S1_at   | Glucose transporter 8                                  | -3.14 |
| Mtr.769.1.S1_at     | Harpin-induced protein 1 family (HIN1)                 | -3.14 |
| Mtr.16583.1.S1_at   | Hypothetical protein                                   | -3.14 |
| Mtr.40827.1.S1_at   | Hypothetical protein                                   | -3.14 |
| Mtr.443.1.S1_at     | Resistance protein candidate RGC2K                     | -3.13 |
| Mtr.11430.1.S1_s_at | Extensin-like protein                                  | -3.13 |
| Mtr.44328.1.S1_at   | Hypothetical protein                                   | -3.13 |
| Mtr.39436.1.S1_at   | RelA-SpoT like protein                                 | -3.13 |
| Mtr.37970.1.S1_at   | Cis,cis-muconate cycloisomerase                        | -3.13 |
| Mtr.33677.1.S1_s_at | Diphosphonucleotide phosphatase                        | -3.13 |
| Mtr.45471.1.S1_at   | Hypothetical protein                                   | -3.13 |
| Mtr.12270.1.S1_at   | Alternative oxidase                                    | -3.13 |
| Mtr.9623.1.S1_at    | Hypothetical protein                                   | -3.13 |
| Mtr.28227.1.S1_at   | Hypothetical protein                                   | -3.13 |
| Mtr.49033.1.S1_s_at | Serine/threonine protein kinase                        | -3.13 |
| Mtr.29262.1.S1_at   | 3-hydroxy-3-methylglutaryl-coenzyme A reductase 2      | -3.13 |
| Mtr.51747.1.S1_at   | Hypothetical protein                                   | -3.13 |
| Mtr.43643.1.S1_at   | Sucrose-phosphatase                                    | -3.12 |
| Mtr.22822.1.S1_at   | Hypothetical protein                                   | -3.12 |
| Mtr.37929.1.S1_at   | Inositol phosphatase                                   | -3.12 |

|                     |                                       |       |
|---------------------|---------------------------------------|-------|
| Mtr.12588.1.S1_at   | Hypothetical protein                  | -3.12 |
| Mtr.32155.1.S1_at   | Hypothetical protein                  | -3.12 |
| Mtr.39594.1.S1_at   | Trehalose-6-phosphate phosphatase     | -3.12 |
| Mtr.37876.1.S1_at   | Protein disulfide isomerase           | -3.12 |
| Mtr.11399.1.S1_at   | Proline-rich protein                  | -3.12 |
| Mtr.32558.1.S1_at   | N-acyl ethanolamine amidohydrolase    | -3.12 |
| Mtr.43812.1.S1_at   | Hypothetical protein                  | -3.12 |
| Mtr.15226.1.S1_at   | bZIP transcription factor             | -3.11 |
| Mtr.8392.1.S1_at    | 4-alpha-glucanotransferase            | -3.11 |
| Mtr.4206.1.S1_at    | Hypothetical protein                  | -3.11 |
| Mtr.38029.1.S1_at   | Chloroplast 50S ribosomal protein L31 | -3.11 |
| Mtr.32171.1.S1_x_at | Aquaporin protein                     | -3.11 |
| Mtr.11558.1.S1_at   | SERK1 protein                         | -3.11 |
| Mtr.48326.1.S1_at   | 60S ribosomal protein L13A            | -3.11 |
| Mtr.39009.1.S1_at   | Serine-rich protein                   | -3.11 |
| Mtr.11023.1.S1_at   | Ethylene-responsive family protein    | -3.11 |
| Mtr.42951.1.S1_at   | Hypothetical protein                  | -3.11 |
| Msa.1635.1.S1_at    | Hypothetical protein                  | -3.11 |
| Mtr.39517.1.S1_at   | Hypothetical protein                  | -3.11 |
| Mtr.13613.1.S1_s_at | Actin-related protein 8B              | -3.10 |
| Mtr.29307.1.S1_at   | Multi resistance protein              | -3.10 |
| Mtr.29108.1.S1_at   | Hypothetical protein                  | -3.10 |
| Mtr.5084.1.S1_at    | Hypothetical protein                  | -3.10 |
| Mtr.5904.1.S1_at    | Salt-inducible protein                | -3.10 |
| Mtr.10265.1.S1_s_at | Hydrolase-like protein                | -3.10 |
| Mtr.11081.1.S1_at   | Hypothetical protein                  | -3.10 |
| Msa.1684.1.S1_at    | Hypothetical protein                  | -3.10 |
| Mtr.13670.1.S1_at   | Hypothetical protein                  | -3.10 |
| Mtr.39924.1.S1_at   | Ethylene-responsive family protein    | -3.10 |
| Mtr.13733.1.S1_at   | Hypothetical protein                  | -3.10 |
| Mtr.41817.1.S1_at   | Sulfate transporter ATST1             | -3.09 |
| Mtr.14184.1.S1_s_at | Annexin                               | -3.09 |
| Mtr.44423.1.S1_at   | Laccase                               | -3.09 |
| Mtr.16346.1.S1_at   | Prefoldin                             | -3.09 |
| Mtr.47312.1.S1_at   | Hydrolase                             | -3.09 |
| Mtr.51178.1.S1_at   | Hypothetical protein                  | -3.09 |
| Mtr.44052.1.S1_at   | Cryptochrome 1 apoprotein             | -3.09 |
| Mtr.29352.1.S1_at   | Peptide transporter                   | -3.09 |
| Mtr.47027.1.S1_at   | Ubiquitin-conjugating enzyme          | -3.09 |
| Mtr.15800.1.S1_at   | Zn-binding protein                    | -3.09 |
| Mtr.8825.1.S1_at    | Hypothetical protein                  | -3.09 |
| Mtr.25491.1.S1_at   | Hypothetical protein                  | -3.09 |
| Mtr.42024.1.S1_at   | Hypothetical protein                  | -3.09 |
| Mtr.33841.1.S1_at   | Hypothetical protein                  | -3.09 |
| Msa.1269.1.S1_at    | Hypothetical protein                  | -3.09 |
| Mtr.7078.1.S1_s_at  | Peroxidase                            | -3.09 |
| Mtr.927.1.S1_at     | Purple acid phosphatase               | -3.09 |
| Mtr.5295.1.S1_at    | GA protein                            | -3.09 |
| Mtr.28065.1.S1_at   | Aromatic rich glycoprotein            | -3.09 |
| Mtr.41209.1.S1_at   | Hypothetical protein                  | -3.08 |
| Mtr.40865.1.S1_at   | Acyl-peptide hydrolase                | -3.08 |
| Mtr.2293.1.S1_at    | Hypothetical protein                  | -3.08 |
| Mtr.8973.1.S1_at    | Hypothetical protein                  | -3.08 |
| Mtr.12933.1.S1_at   | Chloroplast Release Factor 1          | -3.08 |

|                     |                                     |       |
|---------------------|-------------------------------------|-------|
| Mtr.41769.1.S1_at   | Hypothetical protein                | -3.08 |
| Mtr.39884.1.S1_at   | Hypothetical protein                | -3.08 |
| Mtr.42487.1.S1_at   | Alpha-mannosidase                   | -3.08 |
| Mtr.40589.1.S1_at   | Symbiosis-related protein           | -3.08 |
| Mtr.2580.1.S1_at    | Leptin receptor                     | -3.08 |
| Mtr.11062.1.S1_at   | Hypothetical protein                | -3.08 |
| Mtr.13218.1.S1_at   | Hypothetical protein                | -3.08 |
| Mtr.26285.1.S1_s_at | Hypothetical protein                | -3.07 |
| Mtr.9770.1.S1_at    | Hypothetical protein                | -3.07 |
| Mtr.43462.1.S1_at   | Hypothetical protein                | -3.07 |
| Mtr.45728.1.S1_s_at | Pentatricopeptide repeat protein    | -3.07 |
| Mtr.29496.1.S1_at   | H <sup>+</sup> -ATPase              | -3.07 |
| Mtr.5522.1.S1_at    | Urease                              | -3.07 |
| Mtr.35486.1.S1_at   | Hypothetical protein                | -3.07 |
| Mtr.28186.1.S1_at   | Hypothetical protein                | -3.07 |
| Mtr.40545.1.S1_a_at | HSP associated protein              | -3.07 |
| Mtr.28002.1.S1_at   | Hypothetical protein                | -3.07 |
| Mtr.23279.1.S1_at   | Geraniol synthase                   | -3.07 |
| Mtr.12200.1.S1_at   | Hypothetical protein                | -3.07 |
| Mtr.9045.1.S1_at    | Carbonate dehydratase               | -3.07 |
| Mtr.16430.1.S1_at   | Hypothetical protein                | -3.07 |
| Mtr.20400.1.S1_at   | Hypothetical protein                | -3.06 |
| Mtr.39931.1.S1_at   | Hypothetical protein                | -3.06 |
| Mtr.43856.1.S1_at   | Protein kinase                      | -3.06 |
| Mtr.13247.1.S1_at   | Hypothetical protein                | -3.06 |
| Mtr.40674.1.S1_at   | Ribosome-like protein               | -3.06 |
| Mtr.33689.1.S1_at   | Hypothetical protein                | -3.06 |
| Msa.2419.1.S1_at    | Hypothetical protein                | -3.06 |
| Mtr.9050.1.S1_at    | Hypothetical protein                | -3.06 |
| Mtr.21755.1.S1_at   | Hypothetical protein                | -3.06 |
| Mtr.10835.1.S1_s_at | Hypothetical protein                | -3.06 |
| Msa.2803.1.S1_at    | Hypothetical protein                | -3.06 |
| Mtr.40816.1.S1_at   | Thylakoid lumenal 15 kDa protein    | -3.05 |
| Mtr.13656.1.S1_at   | Galactomannan galactosyltransferase | -3.05 |
| Mtr.32980.1.S1_at   | Hypothetical protein                | -3.05 |
| Mtr.29147.1.S1_at   | Hypothetical protein                | -3.05 |
| Mtr.33737.1.S1_at   | Hypothetical protein                | -3.05 |
| Mtr.33407.1.S1_s_at | Sophorol reductase                  | -3.05 |
| Mtr.37847.1.S1_at   | UDP-glycosyltransferase 85A8        | -3.05 |
| Mtr.42323.1.S1_at   | Hypothetical protein                | -3.05 |
| Mtr.5346.1.S1_at    | Receptor-like protein kinase        | -3.05 |
| Mtr.12366.1.S1_s_at | Transcription factor Myb1           | -3.05 |
| Mtr.11116.1.S1_at   | Hypothetical protein                | -3.05 |
| Mtr.20619.1.S1_x_at | Auxin responsive SAUR               | -3.05 |
| Mtr.43210.1.S1_at   | Hypothetical protein                | -3.05 |
| Mtr.28467.1.S1_s_at | Aspartyl aminopeptidase             | -3.04 |
| Mtr.50208.1.S1_at   | Protein kinase                      | -3.04 |
| Mtr.46498.1.S1_at   | Hypothetical protein                | -3.04 |
| Mtr.5649.1.S1_at    | Serine/threonine protein kinase     | -3.04 |
| Mtr.13516.1.S1_s_at | ZF-HD homeobox protein              | -3.04 |
| Mtr.30128.1.S1_at   | Hypothetical protein                | -3.04 |
| Mtr.41688.1.S1_at   | Hypothetical protein                | -3.04 |
| Mtr.28734.1.S1_at   | Hypothetical protein                | -3.03 |
| Mtr.47245.1.S1_s_at | Hypothetical protein                | -3.03 |

|                     |                                                    |       |
|---------------------|----------------------------------------------------|-------|
| Mtr.43324.1.S1_s_at | Polygalacturonase-like protein                     | -3.03 |
| Mtr.27813.1.S1_at   | 6-4 photolyase                                     | -3.03 |
| Mtr.11004.1.S1_s_at | Hydrolase-like protein                             | -3.03 |
| Mtr.38379.1.S1_at   | Egr1 protein                                       | -3.03 |
| Mtr.18798.1.S1_at   | Proteinase inhibitor I3                            | -3.03 |
| Mtr.26982.1.S1_at   | Hypothetical protein                               | -3.03 |
| Mtr.8454.1.S1_at    | Hypothetical protein                               | -3.03 |
| Mtr.32338.1.S1_at   | CLC-e chloride channel protein                     | -3.03 |
| Mtr.11040.1.S1_s_at | Nodulin-like protein                               | -3.03 |
| Mtr.40343.1.S1_s_at | Dihydrofolate reductase-thymidylate synthase       | -3.03 |
| Msa.1945.1.S1_at    | Hypothetical protein                               | -3.03 |
| Mtr.47227.1.S1_s_at | RelA-SpoT like protein                             | -3.03 |
| Msa.1756.1.S1_at    | Hypothetical protein                               | -3.02 |
| Mtr.3652.1.S1_at    | Hypothetical protein                               | -3.02 |
| Mtr.33547.1.S1_at   | Cellulose synthase                                 | -3.02 |
| Mtr.37427.1.S1_at   | Aquaporin TIP4.1 (Tonoplast intrinsic protein 4.1) | -3.02 |
| Mtr.2022.1.S1_at    | Receptor-like protein kinase                       | -3.02 |
| Mtr.26160.1.S1_at   | Hypothetical protein                               | -3.02 |
| Mtr.26115.1.S1_at   | Protein kinase                                     | -3.02 |
| Mtr.553.1.S1_at     | Hypothetical protein                               | -3.02 |
| Mtr.38269.1.S1_at   | Arabinogalactan protein                            | -3.01 |
| Mtr.39248.1.S1_at   | Hypothetical protein                               | -3.01 |
| Mtr.51652.1.S1_at   | Cytochrome P450                                    | -3.01 |
| Mtr.15273.1.S1_at   | Peptidase M14                                      | -3.01 |
| Mtr.44327.1.S1_at   | Adenylate kinase 2                                 | -3.01 |
| Mtr.9426.1.S1_at    | Hypothetical protein                               | -3.01 |
| Mtr.14599.1.S1_at   | Hypothetical protein                               | -3.01 |
| Mtr.12706.1.S1_at   | Hypothetical protein                               | -3.01 |
| Mtr.37510.1.S1_s_at | Hypothetical protein                               | -3.01 |
| Mtr.43099.1.S1_at   | Transcription factor Myb1                          | -3.01 |
| Mtr.12288.1.S1_at   | 2,4-D inducible glutathione S-transferase          | -3.01 |
| Mtr.40352.1.S1_at   | SNF1 like protein kinase                           | -3.01 |
| Mtr.34479.1.S1_at   | Hypothetical protein                               | -3.01 |
| Mtr.17706.1.S1_at   | Hypothetical protein                               | -3.00 |
| Mtr.43893.1.S1_at   | Immunophilin-like protein                          | -3.00 |
| Mtr.29388.1.S1_s_at | Hypothetical protein                               | -3.00 |
| Mtr.40612.1.S1_at   | Myo-inositol monophosphatase 2                     | -3.00 |
| Mtr.40583.1.S1_at   | Polygalacturonase-like protein                     | -3.00 |
| Mtr.45321.1.S1_at   | Diphosphonucleotide phosphatase 1                  | -3.00 |
| Mtr.34769.1.S1_at   | Hypothetical protein                               | -3.00 |



**Supplementary Table S3. Upregulated genes at 24 hours after inoculation with soybean rust**

| <b>Probesets</b>    | <b>Target Description</b>                    | <b>Fold induction</b> |
|---------------------|----------------------------------------------|-----------------------|
| Mtr.37395.1.S1_at   | Deoxycytidine deaminase                      | 1033.01               |
| Mtr.43146.1.S1_at   | Branched-chain-amino-acid aminotransferase 2 | 952.58                |
| Mtr.8417.1.S1_at    | Mitochondrial uncoupling protein             | 582.90                |
| Mtr.18650.1.S1_at   | Glycoside hydrolase                          | 534.19                |
| Mtr.15537.1.S1_at   | Hypothetical protein                         | 527.57                |
| Mtr.22656.1.S1_s_at | Deoxycytidylate deaminase                    | 517.66                |
| Mtr.8498.1.S1_s_at  | Asparagine synthetase                        | 511.70                |
| Mtr.19796.1.S1_at   | Hypothetical protein                         | 489.28                |
| Mtr.18127.1.S1_at   | Glyoxalase                                   | 462.67                |
| Mtr.16278.1.S1_at   | Proteinase inhibitor II2                     | 459.19                |
| Mtr.37375.1.S1_at   | Hypothetical protein                         | 454.82                |
| Mtr.5486.1.S1_s_at  | Hypothetical protein                         | 338.47                |
| Msa.1736.1.S1_at    | Hypothetical protein                         | 326.44                |
| Mtr.43467.1.S1_at   | Hypothetical protein                         | 316.53                |
| Mtr.40564.1.S1_at   | Cyanogenic Beta-Glucosidase                  | 311.69                |
| Mtr.35334.1.S1_s_at | Hypothetical protein                         | 298.89                |
| Mtr.44900.1.S1_at   | Hypothetical protein                         | 298.87                |
| Mtr.22592.1.S1_at   | Cytosolic fructose-1,6-bisphosphatase        | 297.52                |
| Mtr.8498.1.S1_at    | Asparagine synthetase                        | 270.05                |
| Mtr.40120.1.S1_at   | Cationic peroxidase 1                        | 244.97                |
| Mtr.44559.1.S1_at   | Hypothetical protein                         | 217.66                |
| Mtr.34416.1.S1_at   | Pyruvate,orthophosphate dikinase             | 216.42                |
| Mtr.40147.1.S1_s_at | Class 10 PR protein                          | 212.17                |
| Mtr.13321.1.S1_at   | Pyruvate, phosphate dikinase                 | 210.61                |
| Mtr.40553.1.S1_at   | Hypothetical protein                         | 207.64                |
| Mtr.1538.1.S1_at    | Hypothetical protein                         | 206.45                |
| Mtr.45497.1.S1_s_at | Geraniol synthase                            | 203.73                |
| Mtr.45667.1.S1_x_at | Type III polyketide synthase                 | 203.63                |
| Msa.1060.1.S1_at    | Hypothetical protein                         | 200.99                |
| Mtr.42416.1.S1_at   | Hypothetical protein                         | 181.65                |
| Mtr.21662.1.S1_at   | Hypothetical protein                         | 168.93                |
| Mtr.43830.1.S1_at   | Hypothetical protein                         | 161.65                |
| Mtr.43942.1.S1_s_at | Hypothetical protein                         | 158.34                |
| Mtr.39214.1.S1_at   | Hypothetical protein                         | 158.11                |
| Mtr.11656.1.S1_at   | Hypothetical protein                         | 153.11                |
| Mtr.10434.1.S1_at   | SRG1 protein                                 | 151.47                |
| Mtr.42989.1.S1_at   | Thaumatococcus-like protein PR-5b            | 148.87                |
| Mtr.20464.1.S1_x_at | Naringenin-chalcone synthase                 | 147.54                |
| Mtr.41238.1.S1_at   | Hypothetical protein                         | 147.29                |
| Mtr.11055.1.S1_at   | SRG1 protein                                 | 144.35                |
| Mtr.42268.1.S1_at   | Inositol oxygenase                           | 135.99                |
| Mtr.43008.1.S1_at   | Hypothetical protein                         | 134.21                |
| Msa.1879.1.S1_s_at  | Hypothetical protein                         | 133.10                |
| Mtr.331.1.S1_at     | Chitinase                                    | 132.80                |
| Mtr.23418.1.S1_s_at | AP2 domain transcription factor              | 130.97                |
| Mtr.37358.1.S1_s_at | Cytochrome P450 71B13                        | 130.60                |
| Mtr.37393.1.S1_at   | Attacin A                                    | 128.37                |
| Mtr.34968.1.S1_at   | Nucellin-like protein                        | 127.13                |
| Msa.2901.1.S1_s_at  | Hypothetical protein                         | 126.96                |
| Mtr.17404.1.S1_s_at | Aldo/keto reductase                          | 125.77                |
| Mtr.15261.1.S1_s_at | Curculin-like (mannose-binding) lectin       | 125.70                |
| Mtr.39844.1.S1_at   | Hypothetical protein                         | 121.56                |

|                     |                                                               |        |
|---------------------|---------------------------------------------------------------|--------|
| Mtr.11267.1.S1_at   | Protein kinase-like protein                                   | 120.16 |
| Mtr.15678.1.S1_s_at | Aldo/keto reductase                                           | 119.18 |
| Mtr.11104.1.S1_s_at | Hypothetical protein                                          | 118.17 |
| Mtr.34114.1.S1_s_at | Pathogenesis related protein                                  | 116.08 |
| Mtr.40563.1.S1_at   | Cyanogenic Beta-Glucosidase                                   | 114.28 |
| Mtr.37356.1.S1_at   | Cytochrome P450 71B25                                         | 113.58 |
| Mtr.17526.1.S1_at   | Hypothetical protein                                          | 112.27 |
| Mtr.43254.1.S1_at   | Hypothetical protein                                          | 112.13 |
| Mtr.23578.1.S1_s_at | Polygalacturonase-inhibiting protein                          | 111.97 |
| Mtr.33212.1.S1_s_at | Beta-glucosidase                                              | 110.12 |
| Mtr.12748.1.S1_at   | Hypothetical protein                                          | 108.16 |
| Mtr.11851.1.S1_at   | Hypothetical protein                                          | 105.43 |
| Mtr.45373.1.S1_at   | Hypothetical protein                                          | 102.11 |
| Msa.2530.1.S1_s_at  | Hypothetical protein                                          | 101.63 |
| Mtr.12675.1.S1_at   | Integral membrane protein                                     | 101.14 |
| Mtr.4663.1.S1_at    | Light-inducible protein                                       | 99.03  |
| Mtr.10391.1.S1_at   | Class 10 PR protein                                           | 98.15  |
| Mtr.1299.1.S1_s_at  | Cytochrome P450 93B1                                          | 96.31  |
| Mtr.44354.1.S1_at   | Cytochrome P450 monooxygenase                                 | 95.66  |
| Mtr.43279.1.S1_at   | Proline dehydrogenase                                         | 94.67  |
| Mtr.33545.1.S1_s_at | Non-cyanogenic beta-glucosidase                               | 93.91  |
| Mtr.14224.1.S1_at   | Proteinase inhibitor II3                                      | 93.34  |
| Mtr.35755.1.S1_at   | Hypothetical protein                                          | 92.21  |
| Mtr.1402.1.S1_at    | Hypothetical protein                                          | 91.89  |
| Mtr.10573.1.S1_at   | Hypothetical protein                                          | 91.83  |
| Mtr.43196.1.S1_at   | Hypothetical protein                                          | 91.44  |
| Mtr.32248.1.S1_at   | 3-hydroxyisobutyrate dehydrogenase                            | 91.32  |
| Mtr.10502.1.S1_s_at | Glutathione S-transferase parA (Auxin-regulated protein parA) | 89.64  |
| Mtr.24901.1.S1_at   | Phospholipase                                                 | 88.82  |
| Mtr.8831.1.S1_at    | Patatin-like protein 1                                        | 88.71  |
| Mtr.18521.1.S1_at   | Thioredoxin-related protein                                   | 88.62  |
| Mtr.10435.1.S1_s_at | SRG1 protein                                                  | 88.57  |
| Mtr.8599.1.S1_s_at  | Caffeic acid 3-O-methyltransferase 1                          | 88.33  |
| Mtr.21790.1.S1_at   | Hypothetical protein                                          | 87.54  |
| Mtr.51826.1.S1_at   | Hypothetical protein                                          | 87.50  |
| Mtr.28311.1.S1_s_at | Hypothetical protein                                          | 85.01  |
| Mtr.44104.1.S1_at   | Zeatin O-glucosyltransferase                                  | 84.82  |
| Mtr.46391.1.S1_at   | Hypothetical protein                                          | 83.46  |
| Mtr.2105.1.S1_at    | Hypothetical protein                                          | 82.01  |
| Mtr.410.1.S1_s_at   | Isoflavone reductase                                          | 81.83  |
| Mtr.16207.1.S1_at   | Hypothetical protein                                          | 81.19  |
| Mtr.28242.1.S1_at   | Beta-glucan-elicitor receptor                                 | 79.70  |
| Mtr.38035.1.S1_at   | S-locus-like receptor protein kinase                          | 78.05  |
| Mtr.28801.1.S1_at   | Caffeoyl-CoA O-methyltransferase                              | 78.03  |
| Mtr.41059.1.S1_at   | Hypothetical protein                                          | 76.55  |
| Mtr.34158.1.S1_s_at | Hypothetical protein                                          | 75.50  |
| Mtr.43594.1.S1_at   | Hypothetical protein                                          | 74.96  |
| Mtr.23863.1.S1_at   | Glucan 1,3-beta-glucosidase                                   | 72.29  |
| Mtr.15010.1.S1_s_at | Myb DNA-binding protein                                       | 71.05  |
| Mtr.35325.1.S1_at   | Hypothetical protein                                          | 69.73  |
| Mtr.13317.1.S1_at   | Hypothetical protein                                          | 69.47  |
| Mtr.42129.1.S1_at   | AP2 domain transcription factor                               | 69.26  |
| Mtr.40555.1.S1_at   | Osmotin-like protein                                          | 68.96  |
| Mtr.40399.1.S1_at   | CPRD2 protein                                                 | 68.15  |

|                     |                                                                   |       |
|---------------------|-------------------------------------------------------------------|-------|
| Mtr.8599.1.S1_at    | Caffeic acid 3-O-methyltransferase 1                              | 68.09 |
| Mtr.48534.1.S1_at   | Hypothetical protein                                              | 66.32 |
| Mtr.40377.1.S1_at   | Cysteine proteinase inhibitor                                     | 65.99 |
| Mtr.43852.1.S1_at   | Acidic glucanase                                                  | 65.97 |
| Mtr.12246.1.S1_at   | MtN12 protein                                                     | 65.01 |
| Mtr.40412.1.S1_at   | Hypothetical protein                                              | 63.95 |
| Mtr.41670.1.S1_at   | F-box protein                                                     | 63.94 |
| Mtr.34634.1.S1_at   | Epoxide hydrolase                                                 | 62.72 |
| Mtr.41053.1.S1_at   | AT-hook DNA-binding protein                                       | 62.06 |
| Mtr.15831.1.S1_s_at | Hypothetical protein                                              | 61.58 |
| Mtr.22423.1.S1_at   | Hin1 like protein                                                 | 60.27 |
| Mtr.37973.1.S1_at   | Hypothetical protein                                              | 59.44 |
| Mtr.42966.1.S1_at   | Disease resistance response protein Pi49 (PR10)                   | 59.42 |
| Mtr.6667.1.S1_at    | Cytochrome P450 monooxygenase                                     | 59.09 |
| Mtr.37275.1.S1_at   | Pathogen-inducible alpha-dioxygenase                              | 57.81 |
| Mtr.12616.1.S1_at   | Cytochrome P450-like protein                                      | 57.78 |
| Mtr.38234.1.S1_at   | Epoxide hydrolase                                                 | 56.95 |
| Mtr.29026.1.S1_at   | Hypothetical protein                                              | 55.07 |
| Msa.2530.1.S1_at    | Hypothetical protein                                              | 54.86 |
| Mtr.40733.1.S1_at   | Hypothetical protein                                              | 54.77 |
| Mtr.17616.1.S1_x_at | Naringenin-chalcone synthase                                      | 54.17 |
| Mtr.12193.1.S1_at   | RCa12                                                             | 53.65 |
| Mtr.8507.1.S1_at    | Pathogenesis related protein                                      | 53.57 |
| Mtr.8763.1.S1_at    | Thaumatococcus-like protein PR-5a                                 | 53.55 |
| Mtr.28274.1.S1_at   | Avr9/Cf-9 rapidly elicited protein                                | 53.12 |
| Mtr.37718.1.S1_at   | Hypothetical protein                                              | 53.03 |
| Mtr.17621.1.S1_x_at | Naringenin-chalcone synthase                                      | 52.63 |
| Mtr.12502.1.S1_at   | Laccase                                                           | 52.01 |
| Mtr.37984.1.S1_at   | Adenosine nucleotide translocator                                 | 51.59 |
| Mtr.51082.1.S1_at   | Plant lipid transfer/seed storage/trypsin-alpha amylase inhibitor | 51.50 |
| Mtr.25838.1.S1_at   | Hypothetical protein                                              | 51.27 |
| Mtr.45666.1.S1_at   | Glycoside hydrolase                                               | 49.95 |
| Mtr.48647.1.S1_s_at | Hypothetical protein                                              | 49.92 |
| Msa.1231.1.S1_at    | Hypothetical protein                                              | 48.32 |
| Mtr.17612.1.S1_x_at | Naringenin-chalcone synthase                                      | 47.98 |
| Mtr.30508.1.S1_at   | Isoflavone reductase                                              | 47.97 |
| Mtr.44384.1.S1_at   | PDR7 ABC transporter                                              | 47.80 |
| Mtr.10692.1.S1_at   | Cytochrome P450 76C4                                              | 47.57 |
| Mtr.5486.1.S1_at    | Hypothetical protein                                              | 47.16 |
| Mtr.12485.1.S1_at   | Hypothetical protein                                              | 46.81 |
| Mtr.43363.1.S1_at   | Syringolide-induced protein 13-1-1                                | 46.81 |
| Mtr.42255.1.S1_at   | Hypothetical protein                                              | 46.78 |
| Mtr.27937.1.S1_at   | Nodulin-like protein                                              | 46.59 |
| Mtr.11725.1.S1_at   | Isoflavone synthase                                               | 46.27 |
| Mtr.1493.1.S1_at    | Hypothetical protein                                              | 46.13 |
| Mtr.25575.1.S1_x_at | Hypothetical protein                                              | 45.89 |
| Mtr.38241.1.S1_at   | Hypothetical protein                                              | 45.86 |
| Mtr.48996.1.S1_at   | 3Fe-4S ferredoxin                                                 | 45.47 |
| Mtr.49999.1.S1_at   | Phloem-specific lectin PP2-like protein                           | 44.77 |
| Mtr.44487.1.S1_at   | Hypothetical protein                                              | 44.53 |
| Msa.2942.1.S1_s_at  | Hypothetical protein                                              | 44.19 |
| Mtr.38764.1.S1_at   | Cytochrome P450                                                   | 43.75 |
| Mtr.40363.1.S1_at   | Fiber protein Fb19                                                | 43.70 |
| Mtr.10760.1.S1_at   | N-hydroxycinnamoyl/benzoyltransferase-like protein                | 42.83 |

|                     |                                                         |       |
|---------------------|---------------------------------------------------------|-------|
| Mtr.46788.1.S1_at   | L-allo-threonine aldolase                               | 42.31 |
| Mtr.5060.1.S1_at    | Cyanogenic Beta-Glucosidase                             | 42.30 |
| Mtr.41478.1.S1_at   | Class 10 PR protein                                     | 42.29 |
| Mtr.10466.1.S1_at   | Hypothetical protein                                    | 42.14 |
| Mtr.49411.1.S1_at   | Hypothetical protein                                    | 41.85 |
| Mtr.36013.1.S1_at   | Cryptosporidium parvum external transcribed spacer      | 41.72 |
| Mtr.689.1.S1_at     | FAD-linked oxidoreductase                               | 41.56 |
| Mtr.17910.1.S1_at   | Serine/threonine protein kinase                         | 41.43 |
| Mtr.12653.1.S1_at   | Hypothetical protein                                    | 41.37 |
| Mtr.44326.1.S1_at   | Ephrin type-A receptor 5                                | 41.37 |
| Msa.2910.1.S1_at    | Hypothetical protein                                    | 40.48 |
| Mtr.6645.1.S1_at    | Lysine and histidine specific transporter               | 40.29 |
| Mtr.1156.1.S1_at    | Rhcadhesin receptor (Germin-like protein)               | 40.00 |
| Mtr.40613.1.S1_at   | Hypothetical protein                                    | 39.75 |
| Mtr.10127.1.S1_s_at | Phospholipase                                           | 39.36 |
| Mtr.10689.1.S1_at   | Translation factor EF-1 alpha                           | 39.16 |
| Mtr.48768.1.S1_at   | Gibberellin regulated protein                           | 38.94 |
| Mtr.38043.1.S1_at   | Glucosyltransferase-10                                  | 38.55 |
| Mtr.10368.1.S1_at   | Chalcone synthase 8                                     | 38.32 |
| Mtr.25021.1.S1_at   | Vestitone reductase                                     | 38.30 |
| Mtr.8652.1.S1_at    | 6a-hydroxymaackiain methyltransferase                   | 38.29 |
| Mtr.43644.1.S1_at   | Homeodomain transcription factor                        | 37.85 |
| Mtr.8558.1.S1_at    | Hypothetical protein                                    | 37.81 |
| Mtr.11959.1.S1_at   | Serine/threonine protein phosphatase 2A                 | 37.78 |
| Mtr.13239.1.S1_at   | Hypothetical protein                                    | 37.66 |
| Mtr.38079.1.S1_at   | Calcium/calmodulin protein kinase 1                     | 37.60 |
| Mtr.22459.1.S1_at   | Hypothetical protein                                    | 37.53 |
| Mtr.4441.1.S1_at    | Hypothetical protein                                    | 37.46 |
| Mtr.40763.1.S1_at   | Hypothetical protein                                    | 37.42 |
| Mtr.39322.1.S1_at   | UDP-glucuronosyltransferase                             | 37.29 |
| Mtr.8666.1.S1_s_at  | Hypothetical protein                                    | 37.18 |
| Mtr.38957.1.S1_at   | Hypothetical protein                                    | 36.84 |
| Mtr.8725.1.S1_at    | Hypothetical protein                                    | 36.83 |
| Msa.3005.1.S1_at    | Hypothetical protein                                    | 36.79 |
| Mtr.25008.1.S1_x_at | Vestitone reductase                                     | 36.71 |
| Mtr.38121.1.S1_at   | Avr9/Cf-9 rapidly elicited protein                      | 36.19 |
| Mtr.12141.1.S1_at   | Hypothetical protein                                    | 35.93 |
| Mtr.43189.1.S1_at   | Disease resistance response protein                     | 35.92 |
| Mtr.45394.1.S1_at   | Synaptobrevin-like protein                              | 35.84 |
| Mtr.37033.1.S1_s_at | Metalloproteinase                                       | 35.70 |
| Mtr.11773.1.S1_s_at | Hypothetical protein                                    | 35.49 |
| Mtr.37316.1.S1_at   | NAD(P)H dependent 6'-deoxychalcone synthase             | 35.17 |
| Mtr.49123.1.S1_at   | Major intrinsic protein                                 | 34.66 |
| Mtr.44496.1.S1_at   | AP2 domain-containing protein                           | 34.36 |
| Mtr.34762.1.S1_s_at | coII intron protein                                     | 34.14 |
| Mtr.10319.1.S1_at   | Pprg2 protein                                           | 33.92 |
| Mtr.43259.1.S1_at   | Hypothetical protein                                    | 33.63 |
| Mtr.10311.1.S1_at   | Pprg2 protein                                           | 33.39 |
| Mtr.13532.1.S1_at   | Cytochrome P450                                         | 33.39 |
| Mtr.10272.1.S1_at   | Calmodulin                                              | 33.32 |
| Mtr.10898.1.S1_at   | Hypothetical protein                                    | 32.97 |
| Mtr.37579.1.S1_at   | Branched chain alpha-keto acid dehydrogenase E2 subunit | 32.67 |
| Mtr.8667.1.S1_at    | Hypothetical protein                                    | 32.58 |
| Msa.2919.1.S1_at    | Hypothetical protein                                    | 31.95 |

|                     |                                                                        |       |
|---------------------|------------------------------------------------------------------------|-------|
| Mtr.43769.1.S1_at   | Seed imbibition protein                                                | 31.63 |
| Mtr.49341.1.S1_at   | Peptidase, metallopeptidases                                           | 31.31 |
| Mtr.10427.1.S1_at   | Hypothetical protein                                                   | 31.21 |
| Mtr.43569.1.S1_at   | Medicago nodulin N21-like protein                                      | 31.19 |
| Mtr.49305.1.S1_at   | Fatty acid elongase                                                    | 31.12 |
| Mtr.42451.1.S1_at   | Bimodular protein                                                      | 31.09 |
| Mtr.5445.1.S1_at    | Hypothetical protein                                                   | 30.92 |
| Mtr.8975.1.S1_at    | Bifunctional lysine-ketoglutarate reductase/saccharopine dehydrogenase | 30.70 |
| Mtr.23266.1.S1_at   | Protease inhibitor                                                     | 30.61 |
| Mtr.10941.1.S1_at   | Hypothetical protein                                                   | 30.58 |
| Mtr.13960.1.S1_at   | Flavonoid 3'-hydroxylase                                               | 30.19 |
| Mtr.47295.1.S1_x_at | Polygalacturonase inhibitor protein                                    | 30.17 |
| Mtr.18422.1.S1_at   | Hypothetical protein                                                   | 30.17 |
| Mtr.20618.1.S1_s_at | Transferase                                                            | 30.01 |
| Mtr.41495.1.S1_at   | Hypothetical protein                                                   | 29.96 |
| Mtr.47992.1.S1_at   | Hypothetical protein                                                   | 29.96 |
| Mtr.43280.1.S1_x_at | Beta-Glucosidase                                                       | 29.83 |
| Mtr.51557.1.S1_at   | Chitin-binding protein                                                 | 29.77 |
| Msa.2552.1.S1_at    | Hypothetical protein                                                   | 29.61 |
| Mtr.10317.1.S1_at   | Pprg2 protein                                                          | 29.54 |
| Mtr.18.1.S1_at      | Hypothetical protein                                                   | 29.52 |
| Mtr.49557.1.S1_at   | Cys-rich protein                                                       | 29.30 |
| Mtr.6543.1.S1_at    | Hypothetical protein                                                   | 29.29 |
| Mtr.8442.1.S1_at    | Hydroxyproline-rich glycoprotein                                       | 29.28 |
| Mtr.42815.1.S1_at   | N-hydroxycinnamoyl/benzoyltransferase-like protein                     | 29.25 |
| Mtr.51252.1.S1_s_at | Transferase                                                            | 29.04 |
| Mtr.31314.1.S1_at   | NAM                                                                    | 28.97 |
| Mtr.24415.1.S1_s_at | Alpha-amylase                                                          | 28.95 |
| Mtr.32790.1.S1_at   | Drm3                                                                   | 28.93 |
| Mtr.42263.1.S1_s_at | Hypothetical protein                                                   | 28.86 |
| Mtr.9846.1.S1_at    | Hypothetical protein                                                   | 28.38 |
| Mtr.44391.1.S1_at   | Cytochrome P450 82A2                                                   | 28.28 |
| Mtr.13782.1.S1_s_at | Hypothetical protein                                                   | 28.15 |
| Mtr.51693.1.S1_at   | Hypothetical protein                                                   | 28.07 |
| Mtr.6639.1.S1_s_at  | Hypothetical protein                                                   | 28.01 |
| Mtr.19594.1.S1_at   | Cyclin-like F-box                                                      | 27.87 |
| Mtr.42540.1.S1_at   | Elicitor-inducible cytochrome P450                                     | 27.69 |
| Mtr.49688.1.S1_at   | Hypothetical protein                                                   | 27.66 |
| Mtr.42916.1.S1_at   | Hypothetical protein                                                   | 27.60 |
| Mtr.12772.1.S1_at   | Mlo protein                                                            | 27.45 |
| Mtr.38513.1.S1_at   | Syringolide-induced protein 14-1-1                                     | 27.44 |
| Mtr.8425.1.S1_at    | Hypothetical protein                                                   | 27.43 |
| Mtr.10438.1.S1_at   | Kunitz proteinase inhibitor-1                                          | 27.37 |
| Mtr.13536.1.S1_at   | Bifunctional lysine-ketoglutarate reductase/saccharopine dehydrogenase | 27.09 |
| Mtr.7260.1.S1_at    | Ethylene-induced esterase                                              | 27.08 |
| Mtr.50682.1.S1_at   | 14-3-3 protein                                                         | 26.96 |
| Mtr.12569.1.S1_at   | Hypothetical protein                                                   | 26.89 |
| Mtr.27711.1.S1_at   | Hypothetical protein                                                   | 26.85 |
| Mtr.35677.1.S1_at   | Zinc finger protein                                                    | 26.65 |
| Mtr.43513.1.S1_at   | Syringolide-induced protein 19-1-5                                     | 26.47 |
| Mtr.41944.1.S1_at   | Hypothetical protein                                                   | 26.22 |
| Mtr.44504.1.S1_at   | Beta-glucan-elicitor receptor                                          | 26.07 |
| Mtr.34867.1.S1_s_at | Hypothetical protein                                                   | 25.80 |
| Mtr.6154.1.S1_s_at  | Wall-associated kinase                                                 | 25.61 |

|                     |                                                |       |
|---------------------|------------------------------------------------|-------|
| Mtr.45211.1.S1_at   | Phosphoenolpyruvate carboxykinase              | 25.53 |
| Mtr.9372.1.S1_at    | DnaJ protein                                   | 25.52 |
| Mtr.32409.1.S1_at   | Galactokinase                                  | 25.23 |
| Msa.2861.1.S1_at    | Hypothetical protein                           | 25.23 |
| Mtr.38270.1.S1_at   | ABA-responsive protein                         | 25.12 |
| Mtr.32790.1.S1_s_at | Drm3                                           | 25.12 |
| Mtr.24415.1.S1_at   | Alpha-amylase                                  | 25.10 |
| Mtr.34185.1.S1_at   | Hypothetical protein                           | 25.08 |
| Mtr.6666.1.S1_at    | Hypothetical protein                           | 24.93 |
| Mtr.43193.1.S1_at   | Glutamate dehydrogenase 3                      | 24.87 |
| Mtr.38347.1.S1_at   | Tripartite motif protein                       | 24.57 |
| Mtr.37585.1.S1_a_at | Extensin                                       | 24.53 |
| Mtr.43514.1.S1_s_at | Syringolide-induced protein 19-1-5             | 24.34 |
| Mtr.37715.1.S1_at   | Hypothetical protein                           | 24.28 |
| Mtr.40481.1.S1_at   | Isovaleryl-CoA Dehydrogenase                   | 24.26 |
| Mtr.26218.1.S1_s_at | Isovaleryl-CoA Dehydrogenase                   | 24.19 |
| Mtr.45003.1.S1_at   | Non-cyanogenic beta-glucosidase                | 23.95 |
| Mtr.9107.1.S1_at    | Hypothetical protein                           | 23.91 |
| Mtr.13150.1.S1_at   | Hypothetical protein                           | 23.90 |
| Mtr.22561.1.S1_at   | Hypothetical protein                           | 23.85 |
| Mtr.5785.1.S1_s_at  | PDR7 ABC transporter                           | 23.83 |
| Mtr.41268.1.S1_at   | Serine/threonine-specific protein kinase APK2a | 23.61 |
| Mtr.34806.1.S1_s_at | MLO-like protein                               | 23.51 |
| Mtr.25953.1.S1_at   | Cytidine deaminase                             | 23.37 |
| Mtr.27985.1.S1_at   | Hypothetical protein                           | 23.30 |
| Mtr.11066.1.S1_at   | AKIN gamma                                     | 23.19 |
| Mtr.43284.1.S1_at   | Alcohol dehydroge                              | 23.19 |
| Mtr.8751.1.S1_at    | Hypothetical protein                           | 23.17 |
| Mtr.79.1.S1_at      | Hypothetical protein                           | 23.08 |
| Mtr.5385.1.S1_at    | AP2 domain transcription factor                | 22.86 |
| Msa.2701.1.S1_at    | Hypothetical protein                           | 22.85 |
| Mtr.25362.1.S1_s_at | Hypothetical protein                           | 22.82 |
| Mtr.14283.1.S1_at   | Aminotransferase class-III                     | 22.81 |
| Mtr.12487.1.S1_at   | Cyanogenic Beta-Glucosidase                    | 22.78 |
| Mtr.6339.1.S1_at    | Ripening regulated protein                     | 22.71 |
| Mtr.46286.1.S1_at   | Small GTP-binding protein                      | 22.65 |
| Mtr.16615.1.S1_at   | Prephenate dehydratase                         | 22.58 |
| Mtr.17288.1.S1_at   | Hypothetical protein                           | 22.41 |
| Mtr.12764.1.S1_at   | AMP-binding protein                            | 22.39 |
| Mtr.38765.1.S1_at   | LOB domain protein 38                          | 22.39 |
| Mtr.39424.1.S1_at   | Serine/threonine protein kinase                | 22.36 |
| Mtr.46130.1.S1_at   | Synaptobrevin                                  | 22.29 |
| Mtr.38997.1.S1_at   | Serine/threonine protein kinase                | 22.28 |
| Mtr.6950.1.S1_at    | Galactokinase like protein                     | 22.26 |
| Mtr.31952.1.S1_at   | Hypothetical protein                           | 22.20 |
| Mtr.8559.1.S1_at    | Hypothetical protein                           | 22.15 |
| Mtr.33508.1.S1_s_at | Nodulin N21-like protein                       | 22.09 |
| Mtr.40504.1.S1_at   | O-methyltransferase                            | 22.04 |
| Mtr.41772.1.S1_at   | AMP-binding protein                            | 22.03 |
| Mtr.29505.1.S1_s_at | Hypothetical protein                           | 22.00 |
| Mtr.10895.1.S1_at   | Hypothetical protein                           | 21.99 |
| Mtr.40339.1.S1_s_at | Hypothetical protein                           | 21.98 |
| Mtr.8696.1.S1_at    | Zinc finger DNA-binding protein                | 21.74 |
| Mtr.49090.1.S1_at   | GCN5-related N-acetyltransferase               | 21.66 |

|                     |                                                       |       |
|---------------------|-------------------------------------------------------|-------|
| Mtr.43009.1.S1_s_at | Isoflavone 2'-hydroxylase                             | 21.62 |
| Mtr.37376.1.S1_s_at | Hypothetical protein                                  | 21.57 |
| Mtr.6976.1.S1_at    | Hypothetical protein                                  | 21.49 |
| Mtr.39569.1.S1_at   | Hypothetical protein                                  | 21.45 |
| Msa.886.1.S1_s_at   | Hypothetical protein                                  | 21.44 |
| Mtr.11047.1.S1_at   | Mitogen-activated protein kinase 4                    | 21.35 |
| Mtr.45398.1.S1_at   | Exo-1,3-beta-glucanase                                | 21.29 |
| Mtr.11520.1.S1_at   | Protein phosphatase 2C                                | 21.25 |
| Mtr.40340.1.S1_at   | Alkaline alpha galactosidase I                        | 21.23 |
| Mtr.4593.1.S1_at    | Histidine amino acid transporter                      | 21.09 |
| Mtr.12723.1.S1_at   | Nt-gh3 deduced protein                                | 20.97 |
| Mtr.45331.1.S1_at   | Hypothetical protein                                  | 20.90 |
| Mtr.50585.1.S1_at   | Proteinase inhibitor I3                               | 20.80 |
| Mtr.43746.1.S1_at   | Hypothetical protein                                  | 20.66 |
| Mtr.35994.1.S1_at   | Hypothetical protein                                  | 20.64 |
| Mtr.40293.1.S1_at   | Glutathione S-transferase                             | 20.50 |
| Mtr.38067.1.S1_at   | Hypothetical protein                                  | 20.42 |
| Mtr.40882.1.S1_at   | Aldehyde dehydrogenase                                | 20.41 |
| Mtr.28496.1.S1_at   | Protein kinase                                        | 20.36 |
| Mtr.32279.1.S1_at   | SPF1 protein                                          | 20.36 |
| Mtr.23311.1.S1_s_at | Glycosyl hydrolase family 4                           | 20.31 |
| Mtr.10683.1.S1_at   | DNA-binding protein                                   | 20.28 |
| Mtr.50458.1.S1_at   | Hypothetical protein                                  | 20.18 |
| Mtr.11947.1.S1_at   | Early growth response protein                         | 20.09 |
| Mtr.39160.1.S1_at   | Hypothetical protein                                  | 19.97 |
| Mtr.35302.1.S1_at   | Galactokinase                                         | 19.97 |
| Mtr.38233.1.S1_at   | DAZ-associated protein 1                              | 19.94 |
| Mtr.40890.1.S1_at   | WRKY transcription factor 40                          | 19.93 |
| Mtr.35178.1.S1_at   | Branched-chain alpha keto-acid dehydrogenase E1-alpha | 19.74 |
| Mtr.45356.1.S1_at   | Glutamate dehydrogenase                               | 19.68 |
| Mtr.47795.1.S1_at   | Hypothetical protein                                  | 19.63 |
| Mtr.13171.1.S1_at   | Hypothetical protein                                  | 19.60 |
| Mtr.12424.1.S1_at   | Disease resistance response protein                   | 19.55 |
| Mtr.5797.1.S1_at    | Hypothetical protein                                  | 19.49 |
| Mtr.28696.1.S1_at   | Hypothetical protein                                  | 19.39 |
| Mtr.11466.1.S1_at   | Galactokinase like protein                            | 19.34 |
| Mtr.43199.1.S1_at   | Hypothetical protein                                  | 19.29 |
| Mtr.42470.1.S1_at   | Alpha galactosidase                                   | 19.19 |
| Mtr.27728.1.S1_s_at | Hypothetical protein                                  | 19.04 |
| Mtr.51996.1.S1_at   | Hypothetical protein                                  | 18.98 |
| Mtr.24422.1.S1_at   | Hypothetical protein                                  | 18.97 |
| Mtr.16487.1.S1_s_at | Zn-finger, CCHC type                                  | 18.90 |
| Mtr.43280.1.S1_at   | Cyanogenic Beta-Glucosidase                           | 18.75 |
| Mtr.37578.1.S1_at   | Hypothetical protein                                  | 18.71 |
| Mtr.21276.1.S1_at   | TAZ finger                                            | 18.67 |
| Mtr.4996.1.S1_at    | Hypothetical protein                                  | 18.65 |
| Mtr.10221.1.S1_at   | Sugar transporter-like protein                        | 18.63 |
| Mtr.43716.1.S1_at   | Glycosyltransferase                                   | 18.61 |
| Mtr.34720.1.S1_at   | Hypothetical protein                                  | 18.54 |
| Mtr.48829.1.S1_at   | Peptidase aspartic                                    | 18.50 |
| Mtr.42470.1.S1_x_at | Alpha galactosidase                                   | 18.49 |
| Mtr.35802.1.S1_at   | Hypothetical protein                                  | 18.48 |
| Mtr.39059.1.S1_at   | Hypothetical protein                                  | 18.46 |
| Mtr.50729.1.S1_at   | Hypothetical protein                                  | 18.39 |

|                     |                                                          |       |
|---------------------|----------------------------------------------------------|-------|
| Msa.2738.1.S1_at    | Hypothetical protein                                     | 18.38 |
| Mtr.35987.1.S1_s_at | Hypothetical protein                                     | 18.36 |
| Mtr.20803.1.S1_at   | Hypothetical protein                                     | 18.33 |
| Msa.2622.1.S1_at    | Hypothetical protein                                     | 18.32 |
| Mtr.41237.1.S1_at   | Nt-gh3 deduced protein                                   | 18.22 |
| Mtr.27713.1.S1_at   | Cytochrome P450 71A8                                     | 18.17 |
| Mtr.19224.1.S1_at   | bZIP transcription factor                                | 18.16 |
| Mtr.32898.1.S1_at   | Protein phosphatase 2C                                   | 18.15 |
| Mtr.38907.1.S1_at   | Alcohol dehydrogenase                                    | 18.15 |
| Mtr.43203.1.S1_at   | Hypothetical protein                                     | 18.14 |
| Mtr.32486.1.S1_at   | Strubbelig receptor                                      | 18.12 |
| Mtr.12615.1.S1_at   | Pathogenesis-related protein PR10A                       | 18.12 |
| Mtr.35.1.S1_at      | Abscisic acid and environmental stress inducible protein | 18.09 |
| Mtr.32917.1.S1_s_at | Cytochrome oxidase subunit I                             | 17.92 |
| Mtr.12925.1.S1_at   | RING/C3HC4/PHD zinc finger-like protein                  | 17.85 |
| Mtr.33150.1.S1_s_at | Syringolide-induced protein 19-1-5                       | 17.77 |
| Mtr.45768.1.S1_at   | Serine/threonine protein kinase                          | 17.70 |
| Mtr.23575.1.S1_x_at | Polygalacturonase inhibitor protein                      | 17.69 |
| Mtr.38479.1.S1_at   | Hypothetical protein                                     | 17.66 |
| Mtr.40838.1.S1_at   | Electron transfer flavoprotein, alpha subunit            | 17.63 |
| Mtr.21098.1.S1_at   | Oxysterol-binding protein                                | 17.59 |
| Mtr.40410.1.S1_at   | Hypothetical protein                                     | 17.57 |
| Mtr.8601.1.S1_at    | Hypothetical protein                                     | 17.56 |
| Mtr.12277.1.S1_at   | Class 10 PR protein                                      | 17.56 |
| Mtr.43159.1.S1_at   | Bacterial-induced peroxidase                             | 17.49 |
| Mtr.8851.1.S1_at    | Hypothetical protein                                     | 17.44 |
| Mtr.7063.1.S1_at    | Alcohol dehydrogenase                                    | 17.43 |
| Mtr.40588.1.S1_at   | Glutathione S-transferase GST 13                         | 17.34 |
| Mtr.48557.1.S1_at   | Plant integral membrane protein                          | 17.31 |
| Mtr.48287.1.S1_s_at | Hypothetical protein                                     | 17.27 |
| Mtr.37377.1.S1_at   | Hypothetical protein                                     | 17.25 |
| Mtr.41427.1.S1_at   | Pyruvate, phosphate dikinase                             | 17.23 |
| Mtr.1214.1.S1_at    | Hypothetical protein                                     | 17.21 |
| Mtr.48070.1.S1_at   | Hypothetical protein                                     | 17.21 |
| Mtr.29902.1.S1_at   | WRKY DNA-binding protein                                 | 17.16 |
| Mtr.5512.1.S1_at    | Biotin synthase                                          | 17.13 |
| Mtr.5791.1.S1_at    | Anthocyanin 3-O-glucoside-6"-O-malonyltransferase        | 17.12 |
| Mtr.43231.1.S1_s_at | Hypothetical protein                                     | 17.03 |
| Mtr.11118.1.S1_at   | Calcium-dependent protein kinase 2                       | 16.98 |
| Mtr.43656.1.S1_at   | Cysteine protease                                        | 16.91 |
| Mtr.43115.1.S1_at   | Pheromone receptor-like protein                          | 16.87 |
| Mtr.20215.1.S1_s_at | Hypothetical protein                                     | 16.86 |
| Mtr.20486.1.S1_at   | Hypothetical protein                                     | 16.85 |
| Mtr.18629.1.S1_at   | Hypothetical protein                                     | 16.84 |
| Mtr.11285.1.S1_at   | WAK-like kinase                                          | 16.81 |
| Mtr.1886.1.S1_at    | Hypothetical protein                                     | 16.79 |
| Mtr.45989.1.S1_at   | Xylose isomerase                                         | 16.78 |
| Mtr.8987.1.S1_at    | Cytochrome P450 monooxygenase                            | 16.74 |
| Mtr.10079.1.S1_at   | Hypothetical protein                                     | 16.74 |
| Mtr.18819.1.S1_at   | 2OG-Fe(II) oxygenase                                     | 16.62 |
| Mtr.10494.1.S1_x_at | Glutathione S-transferase GST 7                          | 16.59 |
| Msa.1965.1.S1_at    | Hypothetical protein                                     | 16.59 |
| Mtr.40122.1.S1_s_at | Chalcone synthase 4                                      | 16.52 |
| Mtr.13389.1.S1_at   | Receptor protein kinase                                  | 16.51 |



|                        |                                                            |       |
|------------------------|------------------------------------------------------------|-------|
| Mtr.38564.1.S1_at      | Nodulin-like protein                                       | 16.46 |
| MsaAffx.3537.1.S1_s_at | Hypothetical protein                                       | 16.45 |
| Mtr.9661.1.S1_at       | Scarecrow-like 14                                          | 16.44 |
| Mtr.40498.1.S1_at      | Hypothetical protein                                       | 16.41 |
| Mtr.9223.1.S1_at       | AP2 domain transcription factor                            | 16.36 |
| Mtr.3130.1.S1_at       | Hypothetical protein                                       | 16.29 |
| Mtr.20391.1.S1_at      | Hypothetical protein                                       | 16.25 |
| Mtr.39762.1.S1_at      | Chlorophyllase 1                                           | 16.15 |
| Mtr.39563.1.S1_at      | Hypothetical protein                                       | 16.10 |
| Mtr.49012.1.S1_at      | Zn-finger, RING                                            | 16.03 |
| Mtr.5578.1.S1_at       | Receptor protein kinase                                    | 16.02 |
| Mtr.26939.1.S1_at      | Hypothetical protein                                       | 16.01 |
| Mtr.19134.1.S1_at      | Hypothetical protein                                       | 15.99 |
| Mtr.8538.1.S1_at       | Common plant regulatory factor 7                           | 15.93 |
| Mtr.6769.1.S1_at       | Hypothetical protein                                       | 15.91 |
| Mtr.41091.1.S1_at      | Mitogen-activated protein kinase MMK2                      | 15.88 |
| Mtr.44416.1.S1_at      | WRKY-type DNA binding protein                              | 15.87 |
| Mtr.9474.1.S1_at       | MLO-like protein 2                                         | 15.85 |
| Mtr.47442.1.S1_s_at    | Glycosyl hydrolase                                         | 15.77 |
| Mtr.28255.1.S1_at      | Cytochrome P450                                            | 15.76 |
| Mtr.7741.1.S1_at       | Peptide/amino acid transporter                             | 15.73 |
| Mtr.38492.1.S1_at      | AX110P-like protein                                        | 15.68 |
| Mtr.49730.1.S1_at      | Hypothetical protein                                       | 15.68 |
| Mtr.24820.1.S1_s_at    | Fructan 1-exohydrolase                                     | 15.67 |
| Mtr.48695.1.S1_at      | Hypothetical protein                                       | 15.65 |
| Mtr.653.1.S1_s_at      | Short-chain dehydrogenase                                  | 15.64 |
| Mtr.13850.1.S1_at      | Hypothetical protein                                       | 15.61 |
| Mtr.11022.1.S1_at      | RING zinc finger protein                                   | 15.59 |
| Mtr.31521.1.S1_at      | Lysine and histidine specific transporter                  | 15.50 |
| Mtr.10122.1.S1_at      | Nine-cis-epoxycarotenoid dioxygenase 1                     | 15.48 |
| Msa.3122.1.S1_at       | Hypothetical protein                                       | 15.48 |
| Mtr.39165.1.S1_at      | Cobalamin 5-phosphate synthase                             | 15.44 |
| Mtr.4724.1.S1_at       | Organic anion transporter-like protein                     | 15.30 |
| Mtr.12139.1.S1_at      | WRKY transcription factor 29                               | 15.19 |
| Mtr.37378.1.S1_at      | Hypothetical protein                                       | 15.18 |
| Mtr.49400.1.S1_at      | Auxin responsive SAUR protein                              | 15.16 |
| Mtr.15309.1.S1_at      | K <sup>+</sup> channel tetramerisation                     | 15.09 |
| Mtr.28727.1.S1_at      | Adenosine monophosphate binding protein 1                  | 15.05 |
| Mtr.37676.1.S1_at      | Hypothetical protein                                       | 15.05 |
| Mtr.1587.1.S1_at       | Calmodulin-related protein                                 | 15.03 |
| Msa.1042.1.S1_at       | Hypothetical protein                                       | 15.02 |
| Mtr.281.1.S1_at        | Trehalose-6-phosphate phosphatase                          | 14.99 |
| Mtr.46962.1.S1_at      | Hypothetical protein                                       | 14.98 |
| Mtr.6648.1.S1_s_at     | Xyloglucan endotransglycosylase                            | 14.98 |
| Mtr.9254.1.S1_at       | Phe ammonia lyase                                          | 14.89 |
| Mtr.11788.1.S1_at      | Hypothetical protein                                       | 14.86 |
| Mtr.6909.1.S1_at       | Hypothetical protein                                       | 14.81 |
| Mtr.10592.1.S1_at      | Isoflavone reductase                                       | 14.79 |
| Mtr.40605.1.S1_at      | Xyloglucan-specific fungal endoglucanase inhibitor protein | 14.76 |
| Mtr.32991.1.S1_at      | Hypothetical protein                                       | 14.73 |
| Mtr.28125.1.S1_s_at    | Early nodulin GRP3                                         | 14.72 |
| Mtr.42620.1.S1_at      | Organic anion transporter-like protein                     | 14.72 |
| Mtr.34990.1.S1_at      | Cytochrome P450                                            | 14.68 |
| Mtr.40195.1.S1_at      | Pectin methylesterase 5                                    | 14.63 |

|                     |                                                   |       |
|---------------------|---------------------------------------------------|-------|
| Mtr.10896.1.S1_s_at | WIZZ                                              | 14.63 |
| Mtr.35324.1.S1_at   | Peroxidase 2                                      | 14.61 |
| Mtr.31288.1.S1_at   | Isoflavonoid glucosyltransferase                  | 14.54 |
| Mtr.16848.1.S1_at   | Harpin-induced 1                                  | 14.50 |
| Mtr.11468.1.S1_at   | Hypothetical protein                              | 14.50 |
| Mtr.37975.1.S1_at   | CBL-interacting protein kinase                    | 14.49 |
| Mtr.11066.1.S1_s_at | AKIN gamma                                        | 14.47 |
| Msa.2680.1.S1_at    | Hypothetical protein                              | 14.44 |
| Mtr.48791.1.S1_at   | Cys-rich domain protein                           | 14.43 |
| Mtr.32629.1.S1_s_at | Thaumatococcus-like protein PR-5a                 | 14.39 |
| Mtr.50276.1.S1_at   | Phosphoinositide-binding clathrin adaptor protein | 14.31 |
| Mtr.14773.1.S1_at   | Hypothetical protein                              | 14.27 |
| Mtr.43921.1.S1_at   | Hypothetical protein                              | 14.24 |
| Mtr.25007.1.S1_at   | Vestitone reductase                               | 14.23 |
| Mtr.28194.1.S1_at   | Flavonol 3-O-glucosyltransferase 5                | 14.19 |
| Mtr.11520.1.S1_s_at | Protein phosphatase 2C, partial (49%)             | 14.08 |
| Mtr.43772.1.S1_at   | Hypothetical protein                              | 14.05 |
| Mtr.6654.1.S1_at    | Hypothetical protein                              | 14.04 |
| Mtr.51533.1.S1_at   | Myb, DNA-binding protein                          | 14.01 |
| Mtr.28717.1.S1_at   | Hypothetical protein                              | 13.98 |
| Mtr.5695.1.S1_at    | Hypothetical protein                              | 13.98 |
| Mtr.25967.1.S1_at   | Hypothetical protein                              | 13.96 |
| Mtr.11007.1.S1_at   | Avr9/Cf-9 rapidly elicited protein                | 13.96 |
| Mtr.12321.1.S1_at   | MtN19-like protein                                | 13.96 |
| Mtr.38181.1.S1_at   | Expansin-like protein B                           | 13.88 |
| Mtr.27510.1.S1_at   | light resistance protein RGA1                     | 13.87 |
| Mtr.32646.1.S1_at   | Hypothetical protein                              | 13.87 |
| Mtr.25889.1.S1_at   | Protein kinase                                    | 13.86 |
| Mtr.6933.1.S1_at    | Methylcrotonyl-CoA carboxylase                    | 13.85 |
| Mtr.40048.1.S1_at   | Acetylornithine aminotransferase                  | 13.81 |
| Mtr.10049.1.S1_at   | Cycloidea protein                                 | 13.79 |
| Mtr.39450.1.S1_at   | Amino acid permease AAP3                          | 13.79 |
| Mtr.8522.1.S1_at    | Syringolide-induced protein 19-1-5                | 13.68 |
| Mtr.38075.1.S1_at   | Hypothetical protein                              | 13.65 |
| Mtr.25575.1.S1_at   | Hypothetical protein                              | 13.64 |
| Mtr.39710.1.S1_at   | Hypothetical protein                              | 13.60 |
| Msa.1770.1.S1_at    | Hypothetical protein                              | 13.56 |
| Mtr.32738.1.S1_s_at | Myo-inositol oxygenase                            | 13.54 |
| Mtr.33024.1.S1_at   | Glucosidase-like protein                          | 13.53 |
| Mtr.38380.1.S1_at   | Nodulin-like protein                              | 13.48 |
| Mtr.10971.1.S1_s_at | Serine/threonine protein kinase                   | 13.42 |
| Mtr.43230.1.S1_at   | Hypothetical protein                              | 13.37 |
| Mtr.38612.1.S1_at   | Phe ammonia lyase                                 | 13.27 |
| Mtr.25969.1.S1_at   | Hypothetical protein                              | 13.27 |
| Mtr.22854.1.S1_at   | bHLH protein                                      | 13.23 |
| Mtr.42202.1.S1_at   | Hypothetical protein                              | 13.22 |
| Mtr.39140.1.S1_at   | ABC transporter (PDR5-like)                       | 13.14 |
| Mtr.19367.1.S1_at   | Zn-finger, C2H2 type                              | 13.13 |
| Mtr.43646.1.S1_at   | Hypothetical protein                              | 13.13 |
| Mtr.44074.1.S1_at   | Strubbelig receptor family                        | 13.11 |
| Mtr.8884.1.S1_at    | Pathogenesis-related protein 4A                   | 13.09 |
| Mtr.34728.1.S1_at   | Hypothetical protein                              | 13.08 |
| Mtr.43827.1.S1_at   | Hypothetical protein                              | 13.04 |
| Mtr.11991.1.S1_s_at | Strubbelig receptor family                        | 13.02 |

|                     |                                                 |       |
|---------------------|-------------------------------------------------|-------|
| Mtr.6926.1.S1_at    | Hypothetical protein                            | 13.01 |
| Mtr.15380.1.S1_at   | Hypothetical protein                            | 13.01 |
| Mtr.27533.1.S1_s_at | Hypothetical protein                            | 12.95 |
| Mtr.17239.1.S1_at   | Peptidase                                       | 12.95 |
| Mtr.1331.1.S1_s_at  | Hypothetical protein                            | 12.93 |
| Mtr.18596.1.S1_at   | Zn-finger, RING                                 | 12.92 |
| Mtr.11684.1.S1_at   | Beta-D-glucosidase                              | 12.85 |
| Mtr.20187.1.S1_x_at | Naringenin-chalcone synthase                    | 12.83 |
| Mtr.35410.1.S1_at   | Rho GDP dissociation inhibitor 2                | 12.75 |
| Mtr.820.1.S1_at     | Hypothetical protein                            | 12.73 |
| Mtr.27309.1.S1_at   | Hypothetical protein                            | 12.63 |
| Mtr.42808.1.S1_at   | Myb-related transcription factor                | 12.63 |
| Mtr.12511.1.S1_at   | Heat shock factor RHSF2                         | 12.62 |
| Mtr.18222.1.S1_at   | Hypothetical protein                            | 12.60 |
| Mtr.48304.1.S1_s_at | Hypothetical protein                            | 12.60 |
| Mtr.33892.1.S1_at   | Zinc finger protein constans-like 6             | 12.59 |
| Mtr.6769.1.S1_s_at  | Hypothetical protein                            | 12.54 |
| Mtr.19019.1.S1_at   | No apical meristem (NAM) protein                | 12.50 |
| Mtr.22179.1.S1_at   | Hypothetical protein                            | 12.49 |
| Mtr.18040.1.S1_at   | Hypothetical protein                            | 12.48 |
| Mtr.4967.1.S1_at    | GTPase activating protein                       | 12.48 |
| Mtr.35852.1.S1_at   | Auxin-induced protein                           | 12.47 |
| Mtr.41223.1.S1_at   | ATP-dependent phosphoenolpyruvate carboxykinase | 12.47 |
| Mtr.19182.1.S1_at   | Hypothetical protein                            | 12.43 |
| Msa.1404.1.S1_at    | Hypothetical protein                            | 12.42 |
| Mtr.13722.1.S1_at   | Hypothetical protein                            | 12.41 |
| Mtr.15332.1.S1_at   | Myb DNA-binding protein                         | 12.39 |
| Msa.3124.1.S1_at    | Hypothetical protein                            | 12.33 |
| Mtr.15470.1.S1_s_at | Amino acid/polyamine transporter II             | 12.31 |
| Mtr.44194.1.S1_at   | CPRD2 protein                                   | 12.29 |
| Mtr.50317.1.S1_at   | Zn-finger, RING                                 | 12.25 |
| Mtr.32982.1.S1_at   | MutT-like protein                               | 12.23 |
| Mtr.37455.1.S1_at   | Glucosyltransferase-13                          | 12.17 |
| Mtr.8853.1.S1_at    | Arginase 1                                      | 12.13 |
| Mtr.33191.1.S1_at   | Hypothetical protein                            | 12.13 |
| Mtr.39384.1.S1_at   | Hypothetical protein                            | 12.12 |
| Mtr.52242.1.S1_at   | Galactokinase                                   | 12.10 |
| Mtr.10696.1.S1_at   | Syntaxin-related protein                        | 12.08 |
| Mtr.41031.1.S1_at   | 4-coumarate-CoA ligase                          | 12.03 |
| Msa.1264.1.S1_at    | Hypothetical protein                            | 12.00 |
| Mtr.33206.1.S1_s_at | Lustrin A-like protein                          | 11.99 |
| Mtr.32702.1.S1_at   | Hypothetical protein                            | 11.97 |
| Mtr.39195.1.S1_at   | Nitrate transporter NTL1                        | 11.95 |
| Mtr.31575.1.S1_at   | Phosphoribosylanthranilate transferase          | 11.94 |
| Mtr.28033.1.S1_at   | Hypothetical protein                            | 11.94 |
| Mtr.23311.1.S1_at   | Glycosyl hydrolase family 3                     | 11.93 |
| Mtr.12466.1.S1_at   | Chitinase                                       | 11.91 |
| Mtr.15470.1.S1_at   | Amino acid/polyamine transporter II             | 11.86 |
| Mtr.22536.1.S1_at   | Hypothetical protein                            | 11.86 |
| Mtr.19407.1.S1_at   | Octicosapeptide/Phox/Bem1p                      | 11.85 |
| Mtr.35833.1.S1_s_at | Hypothetical protein                            | 11.85 |
| Mtr.46961.1.S1_at   | Hypothetical protein                            | 11.84 |
| Mtr.18113.1.S1_at   | Hypothetical protein                            | 11.83 |
| Mtr.35110.1.S1_at   | Hypothetical protein                            | 11.81 |

|                     |                                                      |       |
|---------------------|------------------------------------------------------|-------|
| Mtr.9997.1.S1_at    | Glucan endo-1,3-beta-glucosidase                     | 11.78 |
| Mtr.1854.1.S1_at    | Hypothetical protein                                 | 11.76 |
| Mtr.12097.1.S1_at   | MtN19-like protein                                   | 11.76 |
| Mtr.11543.1.S1_at   | Gamma-glutamyl hydrolase                             | 11.75 |
| Mtr.22769.1.S1_at   | Hypothetical protein                                 | 11.71 |
| Mtr.34126.1.S1_at   | Hypothetical protein                                 | 11.69 |
| Mtr.27695.1.S1_at   | Auxin response factor                                | 11.68 |
| Mtr.35294.1.S1_at   | Protein kinase                                       | 11.65 |
| Mtr.41894.1.S1_at   | AT-hook DNA-binding protein                          | 11.55 |
| Mtr.26378.1.S1_at   | Hypothetical protein                                 | 11.52 |
| Mtr.30776.1.S1_at   | Patatin-like protein 1                               | 11.50 |
| Mtr.37879.1.S1_at   | Hypothetical protein                                 | 11.44 |
| Mtr.17180.1.S1_at   | Galactose mutarotase                                 | 11.42 |
| Mtr.28177.1.S1_at   | RAB11F                                               | 11.40 |
| Mtr.46462.1.S1_at   | AMP-dependent synthetase and ligase                  | 11.38 |
| Mtr.40601.1.S1_s_at | Hypothetical protein                                 | 11.38 |
| Mtr.7214.1.S1_at    | Hypothetical protein                                 | 11.37 |
| Mtr.11728.1.S1_at   | Hypothetical protein                                 | 11.37 |
| Mtr.43900.1.S1_at   | Hypothetical protein                                 | 11.37 |
| Mtr.40611.1.S1_at   | Peroxidase                                           | 11.36 |
| Mtr.10557.1.S1_at   | PDR-type ABC transporter 2                           | 11.33 |
| Msa.2755.1.S1_at    | Hypothetical protein                                 | 11.29 |
| Mtr.43862.1.S1_at   | Hypothetical protein                                 | 11.25 |
| Mtr.37878.1.S1_at   | Hypothetical protein                                 | 11.25 |
| Mtr.50290.1.S1_s_at | Hypothetical protein                                 | 11.22 |
| Mtr.50994.1.S1_at   | CHY zinc finger protein                              | 11.21 |
| Mtr.14737.1.S1_at   | Protein kinase                                       | 11.20 |
| Mtr.35045.1.S1_at   | Rab escort protein                                   | 11.20 |
| Mtr.29408.1.S1_at   | Hypothetical protein                                 | 11.18 |
| Mtr.9819.1.S1_at    | Hypothetical protein                                 | 11.18 |
| Mtr.9258.1.S1_at    | Receptor-like protein kinase                         | 11.15 |
| Mtr.24370.1.S1_at   | 3'-5' exonuclease                                    | 11.13 |
| Mtr.46408.1.S1_at   | Hypothetical protein                                 | 11.12 |
| Mtr.39132.1.S1_at   | Malate synthase                                      | 11.12 |
| Mtr.33334.1.S1_at   | Exo-1,3-beta-glucanase                               | 11.09 |
| Mtr.12087.1.S1_at   | Hypothetical protein                                 | 11.07 |
| Mtr.29374.1.S1_at   | AKIN gamma                                           | 11.07 |
| Mtr.43294.1.S1_at   | Non-specific lipid transfer-like protein             | 11.07 |
| Mtr.696.1.S1_at     | Auxin-induced (indole-3-acetic acid induced) protein | 11.06 |
| Msa.2329.1.S1_at    | Hypothetical protein                                 | 11.05 |
| Mtr.43916.1.S1_at   | Isoflavone reductase                                 | 11.04 |
| Mtr.8531.1.S1_at    | Chalcone-flavonone isomerase 1                       | 11.01 |
| Mtr.35413.1.S1_at   | O-methyltransferase                                  | 11.00 |
| Mtr.1203.1.S1_at    | CCR4-associated factor-related protein               | 10.99 |
| Mtr.8688.1.S1_at    | Hypothetical protein                                 | 10.94 |
| Msa.2990.1.S1_at    | Hypothetical protein                                 | 10.94 |
| Mtr.12710.1.S1_at   | Syringolide-induced protein B13-1-1                  | 10.90 |
| Mtr.27221.1.S1_at   | Hypothetical protein                                 | 10.87 |
| Mtr.18369.1.S1_at   | Glutathione S-transferase                            | 10.86 |
| Mtr.43392.1.S1_s_at | Cytochrome b                                         | 10.83 |
| Mtr.23988.1.S1_at   | bHLH protein                                         | 10.82 |
| Mtr.15568.1.S1_s_at | DNA-binding WRKY                                     | 10.80 |
| Mtr.3431.1.S1_at    | Hypothetical protein                                 | 10.80 |
| Mtr.11968.1.S1_at   | Alpha galactosidase                                  | 10.76 |

|                     |                                            |       |
|---------------------|--------------------------------------------|-------|
| Mtr.49931.1.S1_at   | E-class P450                               | 10.75 |
| Msa.3054.1.S1_at    | Hypothetical protein                       | 10.72 |
| Mtr.44823.1.S1_at   | Hypothetical protein                       | 10.72 |
| Mtr.34771.1.S1_at   | Hypothetical protein                       | 10.72 |
| Mtr.34448.1.S1_at   | UDP-glucose 4-epimerase                    | 10.70 |
| Mtr.10018.1.S1_at   | Hypothetical protein                       | 10.67 |
| Mtr.42663.1.S1_at   | Ferredoxin-dependent glutamate synthase    | 10.66 |
| Mtr.43783.1.S1_at   | Hypothetical protein                       | 10.65 |
| Mtr.9388.1.S1_at    | WRKY transcription factor 23               | 10.63 |
| Mtr.42072.1.S1_at   | Nodulin                                    | 10.62 |
| Mtr.35080.1.S1_at   | Trehalose-6-phosphate synthase             | 10.59 |
| Mtr.10220.1.S1_s_at | Isoliquiritigenin 2'-O-methyltransferase   | 10.59 |
| Mtr.28687.1.S1_at   | Wax synthase                               | 10.52 |
| Mtr.49572.1.S1_s_at | Naringenin-chalcone synthase               | 10.51 |
| Mtr.45989.1.S1_s_at | Xylose isomerase                           | 10.48 |
| Mtr.40223.1.S1_at   | Hypothetical protein                       | 10.44 |
| Mtr.11134.1.S1_at   | Ornithine aminotransferase                 | 10.40 |
| Mtr.11636.1.S1_at   | Dof zinc finger protein                    | 10.39 |
| Mtr.40619.1.S1_at   | Deltex protein                             | 10.39 |
| Msa.1051.1.S1_at    | Hypothetical protein                       | 10.36 |
| Mtr.6317.1.S1_at    | DUR3                                       | 10.36 |
| Mtr.40983.1.S1_at   | Hypothetical protein                       | 10.36 |
| Mtr.19471.1.S1_at   | Hypothetical protein                       | 10.35 |
| Mtr.32374.1.S1_at   | Serine carboxypeptidase                    | 10.34 |
| Mtr.13455.1.S1_at   | Hypothetical protein                       | 10.33 |
| Mtr.45000.1.S1_at   | Trehalose-6-phosphate synthase/phosphatase | 10.32 |
| Mtr.41039.1.S1_at   | Hypothetical protein                       | 10.31 |
| Mtr.1746.1.S1_at    | Glucosyltransferase-9                      | 10.31 |
| Msa.1267.1.S1_at    | Hypothetical protein                       | 10.30 |
| Mtr.12866.1.S1_at   | Hypothetical protein                       | 10.30 |
| Mtr.6489.1.S1_at    | Glutathione S-transferase GST 15           | 10.29 |
| Mtr.16167.1.S1_at   | Hypothetical protein                       | 10.27 |
| Mtr.6916.1.S1_s_at  | Hypothetical protein                       | 10.27 |
| Mtr.43887.1.S1_at   | Hypothetical protein                       | 10.25 |
| Mtr.43494.1.S1_at   | Hypothetical protein                       | 10.25 |
| Mtr.37168.1.S1_at   | Hypothetical protein                       | 10.24 |
| Mtr.40371.1.S1_at   | Avr9/Cf-9 rapidly elicited protein         | 10.21 |
| Mtr.35775.1.S1_at   | Hypothetical protein                       | 10.20 |
| Mtr.41783.1.S1_at   | Hypothetical protein                       | 10.20 |
| Mtr.20344.1.S1_at   | Seven in absentia protein                  | 10.19 |
| Mtr.24851.1.S1_at   | Hypothetical protein                       | 10.19 |
| Mtr.28790.1.S1_at   | Hypothetical protein                       | 10.18 |
| Msa.1669.1.S1_at    | Hypothetical protein                       | 10.16 |
| Mtr.2844.1.S1_at    | Hypothetical protein                       | 10.13 |
| Mtr.3072.1.S1_at    | Disease resistance protein                 | 10.12 |
| Mtr.38568.1.S1_at   | Kelch repeat-containing F-box-like protein | 10.11 |
| Mtr.45350.1.S1_at   | Hypothetical protein                       | 10.11 |
| Mtr.40194.1.S1_at   | Hypothetical protein                       | 10.07 |
| Mtr.37520.1.S1_at   | Cinnamoyl CoA reductase                    | 10.07 |
| Mtr.7569.1.S1_at    | Cytosolic fructose-1,6-bisphosphatase      | 10.06 |
| Mtr.40680.1.S1_at   | Transcription factor MYBS3                 | 10.05 |
| Mtr.12105.1.S1_at   | Receptor protein kinase                    | 10.05 |
| Mtr.38086.1.S1_at   | Alpha-N-acetylglucosaminidase              | 10.04 |
| Mtr.49572.1.S1_x_at | Naringenin-chalcone synthase               | 10.04 |

|                     |                                                   |       |
|---------------------|---------------------------------------------------|-------|
| Msa.2171.1.S1_at    | Hypothetical protein                              | 10.02 |
| Mtr.41299.1.S1_at   | Hypothetical protein                              | 10.01 |
| Msa.3019.1.S1_at    | Hypothetical protein                              | 9.99  |
| Mtr.35088.1.S1_at   | Hypothetical protein                              | 9.99  |
| Mtr.10396.1.S1_at   | Syringolide-induced protein                       | 9.99  |
| Msa.2259.1.S1_at    | Hypothetical protein                              | 9.96  |
| Msa.1129.1.S1_at    | Hypothetical protein                              | 9.89  |
| Mtr.33213.1.S1_at   | Hypothetical protein                              | 9.88  |
| Mtr.27726.1.S1_at   | Rod shape-determining protein                     | 9.88  |
| Mtr.3602.1.S1_at    | Hypothetical protein                              | 9.82  |
| Msa.3062.1.S1_at    | Hypothetical protein                              | 9.81  |
| Mtr.40724.1.S1_at   | Hypothetical protein                              | 9.78  |
| Mtr.40531.1.S1_at   | O-methyltransferase                               | 9.77  |
| Mtr.38202.1.S1_at   | WRKY transcription factor 28                      | 9.76  |
| Mtr.38093.1.S1_at   | Hypothetical protein                              | 9.74  |
| Mtr.49862.1.S1_at   | Isoflavone-7-o-methyltransferase 9                | 9.74  |
| Mtr.18747.1.S1_at   | Carbamoyl-phosphate synthase                      | 9.74  |
| Mtr.43561.1.S1_s_at | Calcium/calmodulin-regulated receptor-like kinase | 9.70  |
| Mtr.8617.1.S1_at    | Syringolide-induced protein B15-3-5               | 9.69  |
| Mtr.21324.1.S1_at   | ABC transporter                                   | 9.68  |
| Mtr.12684.1.S1_at   | Hypothetical protein                              | 9.67  |
| Mtr.42782.1.S1_s_at | Hypothetical protein                              | 9.67  |
| Mtr.19625.1.S1_at   | Ribonuclease III                                  | 9.64  |
| Mtr.37262.1.S1_at   | Hypothetical protein                              | 9.64  |
| Mtr.31589.1.S1_at   | Arm repeat protein                                | 9.62  |
| Mtr.23085.1.S1_s_at | Hypothetical protein                              | 9.61  |
| Mtr.9897.1.S1_s_at  | Glycerol kinase                                   | 9.61  |
| Mtr.8606.1.S1_at    | O-methyltransferase                               | 9.61  |
| Mtr.5605.1.S1_at    | Protein phosphatase 2C                            | 9.61  |
| Mtr.8813.1.S1_at    | Zinc finger protein                               | 9.56  |
| Msa.1879.1.S1_at    | Hypothetical protein                              | 9.55  |
| Mtr.46208.1.S1_at   | Hypothetical protein                              | 9.53  |
| Mtr.13161.1.S1_at   | Hypothetical protein                              | 9.53  |
| Mtr.37873.1.S1_at   | Hypothetical protein                              | 9.53  |
| Mtr.12291.1.S1_s_at | Proline dehydrogenase                             | 9.51  |
| Mtr.7608.1.S1_at    | 50S ribosomal protein L33                         | 9.50  |
| Mtr.42739.1.S1_at   | Protein kinase                                    | 9.47  |
| Mtr.40177.1.S1_at   | Hypothetical protein                              | 9.43  |
| Mtr.35086.1.S1_at   | Hypothetical protein                              | 9.42  |
| Mtr.24896.1.S1_at   | Hypothetical protein                              | 9.42  |
| Mtr.1951.1.S1_s_at  | Zinc finger protein                               | 9.42  |
| Mtr.20187.1.S1_at   | Naringenin-chalcone synthase                      | 9.41  |
| Mtr.9524.1.S1_at    | Early flowering 3                                 | 9.40  |
| Mtr.8827.1.S1_at    | Cytochrome P450                                   | 9.40  |
| Mtr.40521.1.S1_at   | Adhesive/proline-rich protein                     | 9.38  |
| Mtr.7556.1.S1_at    | AP2 domain containing protein                     | 9.36  |
| Mtr.12477.1.S1_at   | Quinone-oxidoreductase QR1                        | 9.33  |
| Mtr.31649.1.S1_at   | Hypothetical protein                              | 9.31  |
| Mtr.43605.1.S1_at   | Glycosyl transferase                              | 9.31  |
| Mtr.38932.1.S1_at   | Malate synthase                                   | 9.27  |
| Mtr.11414.1.S1_at   | PDR-like ABC transporter                          | 9.25  |
| Mtr.42084.1.S1_at   | Hypothetical protein                              | 9.25  |
| Mtr.25509.1.S1_at   | Hypothetical protein                              | 9.24  |
| Mtr.12648.1.S1_at   | Hypothetical protein                              | 9.21  |

|                     |                                                     |      |
|---------------------|-----------------------------------------------------|------|
| Mtr.43278.1.S1_at   | Cellulose synthase                                  | 9.18 |
| Mtr.35430.1.S1_s_at | Hypothetical protein                                | 9.17 |
| Mtr.39945.1.S1_at   | Hypothetical protein                                | 9.16 |
| Mtr.17570.1.S1_at   | Zn-finger, RING                                     | 9.16 |
| Mtr.31913.1.S1_at   | Hypothetical protein                                | 9.16 |
| Mtr.39267.1.S1_at   | 1-aminocyclopropane-1-carboxylate synthase          | 9.14 |
| Mtr.42078.1.S1_at   | Anthocyanin 5-aromatic acyltransferase              | 9.14 |
| Mtr.8645.1.S1_at    | Riboflavin biosynthesis protein                     | 9.13 |
| Mtr.3060.1.S1_s_at  | Hypothetical protein                                | 9.11 |
| Mtr.10616.1.S1_at   | Hypothetical protein                                | 9.11 |
| Mtr.42703.1.S1_at   | Hypothetical protein                                | 9.05 |
| Mtr.33446.1.S1_at   | Sucrose transporter                                 | 9.04 |
| Mtr.41419.1.S1_at   | Ring domain containing protein                      | 9.04 |
| Mtr.36186.1.S1_at   | Nitrate transporter NTL1                            | 9.01 |
| Mtr.10743.1.S1_at   | SRG1 protein                                        | 9.00 |
| Mtr.45572.1.S1_at   | Hypothetical protein                                | 8.99 |
| Mtr.35243.1.S1_at   | Hypothetical protein                                | 8.97 |
| Mtr.23580.1.S1_at   | Polygalacturonase inhibitor protein                 | 8.96 |
| Mtr.38844.1.S1_at   | Hypothetical protein                                | 8.95 |
| Mtr.36847.1.S1_at   | Hypothetical protein                                | 8.94 |
| Mtr.48884.1.S1_at   | Hypothetical protein                                | 8.93 |
| Mtr.51571.1.S1_s_at | Amino acid/polyamine transporter II                 | 8.93 |
| Mtr.474.1.S1_s_at   | Peroxisomal membrane protein                        | 8.92 |
| Mtr.19162.1.S1_at   | AMP-dependent synthetase and ligase                 | 8.92 |
| Mtr.26898.1.S1_at   | Hypothetical protein                                | 8.91 |
| Mtr.15997.1.S1_s_at | Haem peroxidase                                     | 8.91 |
| Mtr.45912.1.S1_at   | Pathogenesis-related transcriptional factor and ERF | 8.86 |
| Mtr.5817.1.S1_at    | Phospholipid-transporting ATPase 1                  | 8.85 |
| Mtr.35172.1.S1_at   | Hypothetical protein                                | 8.83 |
| Mtr.11385.1.S1_at   | Hypothetical protein                                | 8.80 |
| Mtr.8876.1.S1_at    | Short-chain dehydrogenase Tic32                     | 8.79 |
| Mtr.11811.1.S1_s_at | Phi-1-like protein                                  | 8.78 |
| Mtr.42692.1.S1_at   | Glutaredoxin-like protein                           | 8.78 |
| Mtr.1625.1.S1_s_at  | Protein kinase                                      | 8.76 |
| Mtr.45193.1.S1_at   | Hypothetical protein                                | 8.73 |
| Mtr.4576.1.S1_s_at  | Indole-3-acetate beta-glucosyltransferase           | 8.72 |
| Mtr.18822.1.S1_at   | Heavy metal transport/detoxification protein        | 8.71 |
| Mtr.43944.1.S1_at   | Sporulation-specific glucan 1,3-beta-glucosidase    | 8.71 |
| Mtr.24063.1.S1_at   | F-box protein                                       | 8.70 |
| Mtr.38330.1.S1_at   | Hypothetical protein                                | 8.69 |
| Mtr.14303.1.S1_at   | Iron hydrogenase                                    | 8.69 |
| Mtr.20425.1.S1_at   | Hypothetical protein                                | 8.66 |
| Msa.686.1.S1_at     | Hypothetical protein                                | 8.66 |
| Mtr.9637.1.S1_at    | Myb-related transcription factor                    | 8.65 |
| Mtr.10370.1.S1_at   | Peroxidase1B                                        | 8.64 |
| Mtr.12044.1.S1_at   | Cellulose synthase                                  | 8.64 |
| Mtr.15849.1.S1_at   | Glycine-rich RNA binding protein                    | 8.63 |
| Mtr.44130.1.S1_s_at | Hypothetical protein                                | 8.63 |
| Mtr.35231.1.S1_s_at | Pathogenesis-related protein                        | 8.62 |
| Mtr.14494.1.S1_at   | Dihydroorotate dehydrogenase 1                      | 8.59 |
| Mtr.12664.1.S1_at   | Hypothetical protein                                | 8.55 |
| Mtr.39298.1.S1_at   | Hypothetical protein                                | 8.54 |
| Mtr.15772.1.S1_at   | Glycoside hydrolase                                 | 8.53 |
| Mtr.47441.1.S1_at   | Hypothetical protein                                | 8.53 |

|                     |                                           |      |
|---------------------|-------------------------------------------|------|
| Mtr.29300.1.S1_s_at | Hypothetical protein                      | 8.53 |
| Mtr.35813.1.S1_at   | Hypothetical protein                      | 8.51 |
| Mtr.11783.1.S1_at   | Hypothetical protein                      | 8.51 |
| Mtr.16822.1.S1_at   | Hypothetical protein                      | 8.50 |
| Mtr.43585.1.S1_at   | 1-deoxy-D-xylulose 5-phosphate synthase 2 | 8.50 |
| Mtr.27830.1.S1_at   | Arginine/serine-rich protein              | 8.49 |
| Mtr.34199.1.S1_at   | 2-oxoglutarate-dependent oxygenase        | 8.46 |
| Mtr.10575.1.S1_at   | Hypothetical protein                      | 8.45 |
| Mtr.27129.1.S1_at   | Zinc finger protein                       | 8.44 |
| Mtr.13757.1.S1_at   | Hin1-like protein                         | 8.43 |
| Mtr.40333.1.S1_x_at | Uclacyanin II precursor                   | 8.43 |
| Mtr.20804.1.S1_at   | Serine/threonine protein kinase           | 8.42 |
| Mtr.33361.1.S1_at   | Hypothetical protein                      | 8.42 |
| Mtr.15250.1.S1_at   | ABC transporter                           | 8.41 |
| Mtr.44775.1.S1_at   | G-protein alpha-subunit                   | 8.40 |
| Mtr.40928.1.S1_at   | PGPD14 protein                            | 8.40 |
| Mtr.17788.1.S1_at   | Ankyrin                                   | 8.37 |
| Mtr.33365.1.S1_s_at | PDR7 ABC transporter                      | 8.37 |
| Mtr.40076.1.S1_at   | RNA Binding Protein 45                    | 8.36 |
| Mtr.9523.1.S1_at    | Hypothetical protein                      | 8.36 |
| Mtr.27095.1.S1_at   | Hypothetical protein                      | 8.36 |
| Mtr.12832.1.S1_at   | Receptor-like serine/threonine kinase     | 8.32 |
| Mtr.19206.1.S1_at   | Ras GTPase                                | 8.31 |
| Mtr.9392.1.S1_at    | Flavonoid 3'-hydroxylase                  | 8.28 |
| Mtr.238.1.S1_at     | Metal transport protein                   | 8.23 |
| Mtr.31946.1.S1_at   | Hypothetical protein                      | 8.21 |
| Mtr.38485.1.S1_at   | Hypothetical protein                      | 8.21 |
| Mtr.42373.1.S1_at   | Peroxidase 40                             | 8.18 |
| Mtr.9079.1.S1_at    | Hypothetical protein                      | 8.18 |
| Mtr.29368.1.S1_at   | Receptor-like protein kinase              | 8.17 |
| Msa.1878.1.S1_at    | Hypothetical protein                      | 8.16 |
| Mtr.49680.1.S1_at   | Hypothetical protein                      | 8.15 |
| Mtr.5044.1.S1_s_at  | Hypothetical protein                      | 8.15 |
| Mtr.49578.1.S1_at   | Hypothetical protein                      | 8.15 |
| Mtr.41930.1.S1_at   | Hypothetical protein                      | 8.14 |
| Mtr.43416.1.S1_at   | Zinc-finger protein                       | 8.11 |
| Mtr.22903.1.S1_at   | Chitinase (Class II)                      | 8.09 |
| Mtr.43734.1.S1_at   | Protein kinase C                          | 8.09 |
| Mtr.10127.1.S1_at   | Phospholipase-like protein                | 8.08 |
| Mtr.13044.1.S1_at   | WRKY transcription factor 5               | 8.07 |
| Mtr.44516.1.S1_at   | Type IIB calcium ATPase                   | 8.05 |
| Mtr.44349.1.S1_at   | Zinc transporter                          | 8.04 |
| Mtr.33142.1.S1_at   | Hypothetical protein                      | 8.04 |
| Mtr.8654.1.S1_at    | Peroxidase                                | 8.04 |
| Msa.1604.1.S1_at    | Hypothetical protein                      | 8.03 |
| Mtr.38064.1.S1_at   | Hypothetical protein                      | 8.03 |
| Mtr.25476.1.S1_at   | Auxin efflux carrier protein              | 8.01 |
| Mtr.14090.1.S1_at   | AUX/IAA protein                           | 8.00 |
| Mtr.9063.1.S1_at    | Glucose/sorbosone dehydrogenases          | 8.00 |
| Mtr.9668.1.S1_at    | Hypothetical protein                      | 7.99 |
| Mtr.43236.1.S1_at   | UDP-glucosyltransferase HRA25             | 7.97 |
| Msa.952.1.S1_at     | Hypothetical protein                      | 7.97 |
| Mtr.11087.1.S1_at   | Hypothetical protein                      | 7.96 |
| Mtr.12377.1.S1_at   | WRKY transcription factor 11              | 7.92 |



|                     |                                                               |      |
|---------------------|---------------------------------------------------------------|------|
| Mtr.11256.1.S1_at   | Hypothetical protein                                          | 7.91 |
| Mtr.32555.1.S1_s_at | Vitellogenin A                                                | 7.91 |
| Mtr.10681.1.S1_at   | Universal stress protein USP1-like protein                    | 7.90 |
| Mtr.4934.1.S1_s_at  | Hypothetical protein                                          | 7.90 |
| Mtr.41809.1.S1_s_at | Non-phototropic hypocotyl 3                                   | 7.90 |
| Mtr.39431.1.S1_at   | Aldehyde reductase                                            | 7.88 |
| Mtr.15773.1.S1_at   | Cyclin-like F-box                                             | 7.87 |
| Mtr.32284.1.S1_at   | Hypothetical protein                                          | 7.87 |
| Mtr.41342.1.S1_at   | Serine/threonine-protein kinase 24                            | 7.86 |
| Mtr.11621.1.S1_at   | Hypothetical protein                                          | 7.85 |
| Mtr.39423.1.S1_at   | Hypothetical protein                                          | 7.85 |
| Mtr.40277.1.S1_at   | Isoflavone synthase                                           | 7.84 |
| Mtr.42263.1.S1_at   | Hypothetical protein                                          | 7.84 |
| Mtr.41149.1.S1_at   | Glutathione S-transferase GST 11                              | 7.84 |
| Mtr.13586.1.S1_at   | Transcription activator                                       | 7.83 |
| Mtr.49896.1.S1_at   | Non-cell-autonomous protein                                   | 7.81 |
| Mtr.38443.1.S1_at   | Hypothetical protein                                          | 7.80 |
| Mtr.37253.1.S1_at   | Amino acid transporter                                        | 7.79 |
| Mtr.49441.1.S1_at   | 2OG-Fe(II) oxygenase                                          | 7.79 |
| Mtr.39741.1.S1_s_at | Hypothetical protein                                          | 7.79 |
| Mtr.30654.1.S1_at   | Hypothetical protein                                          | 7.77 |
| Msa.2372.1.S1_at    | Hypothetical protein                                          | 7.77 |
| Msa.1067.1.S1_at    | Hypothetical protein                                          | 7.76 |
| Mtr.44144.1.S1_at   | Lap1 protein                                                  | 7.75 |
| Mtr.21216.1.S1_at   | Exo70 exocyst complex subunit                                 | 7.72 |
| Mtr.27096.1.S1_at   | Cinnamyl-alcohol dehydrogenase                                | 7.72 |
| Mtr.49085.1.S1_at   | GCN5-related N-acetyltransferase                              | 7.71 |
| Mtr.40277.1.S1_x_at | Isoflavone synthase                                           | 7.70 |
| Mtr.3066.1.S1_s_at  | Hypothetical protein                                          | 7.69 |
| Mtr.13470.1.S1_s_at | Hypothetical protein                                          | 7.69 |
| Mtr.15053.1.S1_at   | Thaumatococin                                                 | 7.67 |
| Mtr.12290.1.S1_at   | Proline dehydrogenase                                         | 7.67 |
| Mtr.42955.1.S1_at   | Cytochrome P450                                               | 7.67 |
| Mtr.51195.1.S1_at   | AAA ATPase                                                    | 7.67 |
| Mtr.20618.1.S1_at   | Transferase                                                   | 7.66 |
| Mtr.51997.1.S1_at   | Hypothetical protein                                          | 7.66 |
| Mtr.11565.1.S1_at   | Patatin-like protein                                          | 7.65 |
| Mtr.25887.1.S1_at   | bHLH protein                                                  | 7.65 |
| Mtr.14686.1.S1_at   | Peptidase aspartic                                            | 7.64 |
| Mtr.11716.1.S1_at   | Methionine sulfoxide reductase A                              | 7.64 |
| Mtr.9421.1.S1_at    | Indole-3-acetate beta-glucosyltransferase                     | 7.63 |
| Mtr.47412.1.S1_at   | Hypothetical protein                                          | 7.62 |
| Mtr.6834.1.S1_at    | Zeatin O-glucosyltransferase                                  | 7.61 |
| Mtr.48874.1.S1_at   | Hypothetical protein                                          | 7.61 |
| Mtr.33482.1.S1_s_at | Carbonic anhydrase 2                                          | 7.59 |
| Mtr.1401.1.S1_at    | Hypothetical protein                                          | 7.56 |
| Mtr.10681.1.S1_s_at | Universal stress protein USP1-like protein                    | 7.52 |
| Mtr.7267.1.S1_at    | Hypothetical protein                                          | 7.50 |
| Mtr.2157.1.S1_s_at  | Hypothetical protein                                          | 7.50 |
| Mtr.45320.1.S1_at   | Hypothetical protein                                          | 7.49 |
| Mtr.44941.1.S1_s_at | Glyoxysomal fatty acid beta-oxidation multifunctional protein | 7.48 |
| Mtr.17409.1.S1_s_at | Amino acid/polyamine transporter II                           | 7.48 |
| Mtr.33221.1.S1_s_at | acyl-activating enzyme                                        | 7.48 |
| Mtr.10308.1.S1_at   | Hydroxyproline-rich glycoprotein                              | 7.48 |

|                     |                                                    |      |
|---------------------|----------------------------------------------------|------|
| Msa.2831.1.S1_at    | Hypothetical protein                               | 7.48 |
| Mtr.42626.1.S1_at   | Hypothetical protein                               | 7.47 |
| Mtr.10655.1.S1_at   | Hypothetical protein                               | 7.47 |
| Mtr.34766.1.S1_at   | Zinc finger protein                                | 7.44 |
| Mtr.8444.1.S1_s_at  | Hypothetical protein                               | 7.43 |
| Mtr.51734.1.S1_at   | Hypothetical protein                               | 7.43 |
| Mtr.22675.1.S1_at   | Hypothetical protein                               | 7.43 |
| Mtr.15895.1.S1_s_at | Dormancyauxin associated protein                   | 7.43 |
| Mtr.39679.1.S1_at   | Hypothetical protein                               | 7.42 |
| Mtr.28572.1.S1_at   | Cytochrome b                                       | 7.42 |
| Mtr.47292.1.S1_at   | Hypothetical protein                               | 7.40 |
| Mtr.12540.1.S1_s_at | Receptor kinase-like protein                       | 7.37 |
| Mtr.18344.1.S1_at   | Serine/threonine protein kinase                    | 7.37 |
| Mtr.12694.1.S1_at   | NAC domain protein NAC1                            | 7.37 |
| Mtr.31177.1.S1_at   | Ubiquitin-protein ligase                           | 7.36 |
| Mtr.35741.1.S1_at   | Hypothetical protein                               | 7.35 |
| Mtr.10701.1.S1_at   | Axi 1 protein-like protein                         | 7.35 |
| Mtr.17829.1.S1_at   | UDP-glucose 4-epimerase                            | 7.35 |
| Mtr.42855.1.S1_s_at | Plastidic ATP/ADP transporter                      | 7.34 |
| Mtr.51734.1.S1_s_at | Hypothetical protein                               | 7.34 |
| Mtr.11388.1.S1_at   | Transcription factor                               | 7.33 |
| Mtr.41533.1.S1_at   | Calcium binding protein                            | 7.32 |
| Mtr.3151.1.S1_s_at  | Hypothetical protein                               | 7.31 |
| Mtr.33855.1.S1_at   | Alpha-N-acetylglucosaminidase                      | 7.30 |
| Mtr.37757.1.S1_at   | Anthranilate N-benzoyltransferase-like protein     | 7.30 |
| Mtr.20508.1.S1_s_at | Pyridine nucleotide-disulphide oxidoreductase      | 7.30 |
| Mtr.43550.1.S1_at   | Tyrosine aminotransferase                          | 7.28 |
| Mtr.17497.1.S1_at   | bHLH protein                                       | 7.28 |
| Mtr.42299.1.S1_at   | Hypothetical protein                               | 7.26 |
| Mtr.28796.1.S1_at   | Cytochrome P450 monooxygenase                      | 7.25 |
| Mtr.44122.1.S1_at   | Hypothetical protein                               | 7.24 |
| Mtr.50492.1.S1_s_at | Translation factor                                 | 7.23 |
| Mtr.41506.1.S1_at   | Hypothetical protein                               | 7.22 |
| Mtr.11156.1.S1_at   | Leucine-rich repeat receptor-like protein kinase 1 | 7.21 |
| Mtr.45877.1.S1_at   | RNA-binding region RNP-1                           | 7.20 |
| Mtr.38072.1.S1_at   | Hypothetical protein                               | 7.18 |
| Mtr.8948.1.S1_at    | Cytochrome P450 82A1                               | 7.18 |
| Msa.2506.1.S1_at    | Hypothetical protein                               | 7.18 |
| Mtr.12708.1.S1_at   | Isoflavone reductase                               | 7.17 |
| Mtr.6009.1.S1_at    | Hypothetical protein                               | 7.16 |
| Mtr.17610.1.S1_at   | Hypothetical protein                               | 7.16 |
| Mtr.28550.1.S1_at   | Hypothetical protein                               | 7.16 |
| Mtr.38022.1.S1_at   | LEXYL1 protein                                     | 7.16 |
| Mtr.49091.1.S1_at   | Hypothetical protein                               | 7.14 |
| Mtr.2735.1.S1_at    | Hypothetical protein                               | 7.14 |
| Mtr.37708.1.S1_at   | Sulfate transporter-like protein                   | 7.12 |
| Mtr.6049.1.S1_s_at  | S-receptor kinase                                  | 7.12 |
| Mtr.17940.1.S1_at   | U box protein                                      | 7.12 |
| Mtr.15228.1.S1_at   | Pre-mRNA processing ribonucleoprotein              | 7.11 |
| Mtr.10027.1.S1_at   | Hypothetical protein                               | 7.09 |
| Mtr.43364.1.S1_at   | Hypothetical protein                               | 7.08 |
| Mtr.9897.1.S1_at    | Glycerol kinase                                    | 7.08 |
| Mtr.48873.1.S1_s_at | Acid phosphatase (Class B)                         | 7.07 |
| Mtr.16539.1.S1_s_at | Hypothetical protein                               | 7.07 |

|                     |                                                   |      |
|---------------------|---------------------------------------------------|------|
| Mtr.6875.1.S1_at    | Hypothetical protein                              | 7.06 |
| Mtr.29535.1.S1_x_at | Hypothetical protein                              | 7.06 |
| Mtr.34958.1.S1_at   | Hypothetical protein                              | 7.06 |
| Mtr.8621.1.S1_s_at  | Hypothetical protein                              | 7.06 |
| Mtr.37823.1.S1_at   | CPRD49 protein                                    | 7.06 |
| Mtr.38247.1.S1_at   | Seven in absentia-like protein                    | 7.05 |
| Mtr.38959.1.S1_s_at | GTP-binding protein                               | 7.05 |
| Mtr.11202.1.S1_s_at | Hypothetical protein                              | 7.04 |
| Mtr.12749.1.S1_at   | Hypothetical protein                              | 7.03 |
| Mtr.39742.1.S1_at   | Hypothetical protein                              | 7.03 |
| Mtr.42673.1.S1_at   | Receptor-like serine/threonine kinase             | 7.03 |
| Mtr.35144.1.S1_s_at | acyl-activating enzyme 13                         | 7.03 |
| Mtr.10090.1.S1_at   | Homo-phytochelatin synthase                       | 7.02 |
| Mtr.4702.1.S1_at    | Fiber protein Fb1                                 | 7.02 |
| Mtr.40880.1.S1_at   | Electron transfer flavoprotein beta-subunit       | 7.00 |
| Mtr.43144.1.S1_at   | NtEIG-E80 protein                                 | 6.97 |
| Mtr.49088.1.S1_at   | Rhodanese-like protein                            | 6.96 |
| Mtr.46200.1.S1_at   | CCCH-type zinc finger protein                     | 6.96 |
| Mtr.41563.1.S1_s_at | Ring finger E3 ligase                             | 6.96 |
| Mtr.7255.1.S1_at    | Arm repeat protein                                | 6.94 |
| Mtr.52294.1.S1_at   | DNA photolyase                                    | 6.93 |
| Mtr.12378.1.S1_at   | Serine/threonine-protein kinase                   | 6.93 |
| Mtr.7397.1.S1_at    | Heat shock transcription factor 34                | 6.92 |
| Mtr.40125.1.S1_at   | Peroxidase1B                                      | 6.91 |
| Mtr.49055.1.S1_s_at | Hypothetical protein                              | 6.91 |
| Mtr.21028.1.S1_at   | Hypothetical protein                              | 6.90 |
| Mtr.38349.1.S1_at   | NAM (no apical meristem)-like protein             | 6.89 |
| Mtr.50766.1.S1_at   | Hypothetical protein                              | 6.88 |
| Mtr.43825.1.S1_at   | Hypothetical protein                              | 6.87 |
| Mtr.29335.1.S1_at   | Receptor-like protein kinase ARK1                 | 6.87 |
| Mtr.8933.1.S1_at    | Homogentisate 1,2-dioxygenase                     | 6.87 |
| Mtr.11053.1.S1_at   | WRKY-type transcription factor                    | 6.87 |
| Mtr.7906.1.S1_at    | Vasopressin V1b receptor                          | 6.87 |
| Mtr.4906.1.S1_s_at  | 1-aminocyclopropane-1-carboxylate oxidase         | 6.87 |
| Mtr.23572.1.S1_at   | Hypothetical protein                              | 6.86 |
| Mtr.48787.1.S1_s_at | WD-40 repeat protein                              | 6.85 |
| Mtr.19871.1.S1_at   | Calcium-binding EF-hand                           | 6.85 |
| Mtr.13594.1.S1_s_at | Lipase-like protein                               | 6.84 |
| Mtr.34980.1.S1_s_at | Hypothetical protein                              | 6.84 |
| Mtr.45910.1.S1_at   | Hypothetical protein                              | 6.83 |
| Mtr.41255.1.S1_at   | Amino acid permease AAP3                          | 6.82 |
| Mtr.32195.1.S1_at   | Urea active transporter                           | 6.82 |
| Mtr.43455.1.S1_at   | Hypothetical protein                              | 6.81 |
| Mtr.24411.1.S1_at   | Hypothetical protein                              | 6.81 |
| Mtr.4083.1.S1_s_at  | Hypothetical protein                              | 6.81 |
| Msa.3071.1.S1_at    | Hypothetical protein                              | 6.80 |
| Mtr.5781.1.S1_at    | Hypothetical protein                              | 6.79 |
| Mtr.246.1.S1_at     | DnaJ-like protein                                 | 6.79 |
| Mtr.12685.1.S1_at   | Calcium/calmodulin-regulated receptor-like kinase | 6.78 |
| Mtr.45080.1.S1_at   | Retinoic acid receptor alpha (RAR-alpha)          | 6.78 |
| Mtr.33275.1.S1_s_at | Hypothetical protein                              | 6.77 |
| Mtr.48109.1.S1_at   | WRKY4 transcription factor                        | 6.76 |
| Mtr.8726.1.S1_at    | Hypothetical protein                              | 6.76 |
| Mtr.50358.1.S1_at   | Hypothetical protein                              | 6.74 |

|                     |                                          |      |
|---------------------|------------------------------------------|------|
| Mtr.5869.1.S1_at    | Hexose carrier protein                   | 6.74 |
| Mtr.43291.1.S1_at   | Fiber protein Fb1                        | 6.72 |
| Mtr.40066.1.S1_at   | Hydroxyproline-rich glycoprotein         | 6.72 |
| Mtr.37347.1.S1_s_at | Hypothetical protein                     | 6.71 |
| Mtr.6889.1.S1_at    | Hypothetical protein                     | 6.67 |
| Mtr.11488.1.S1_at   | Hypothetical protein                     | 6.67 |
| Mtr.31452.1.S1_at   | Hypothetical protein                     | 6.65 |
| Mtr.38358.1.S1_s_at | Hypothetical protein                     | 6.65 |
| Mtr.40847.1.S1_at   | Heat shock transcription factor HSF30    | 6.65 |
| Mtr.10325.1.S1_at   | Chitinase                                | 6.63 |
| Mtr.24481.1.S1_at   | Hypothetical protein                     | 6.63 |
| Mtr.29298.1.S1_at   | Hypothetical protein                     | 6.63 |
| Mtr.39754.1.S1_at   | NAM (No apical meristem)-like protein    | 6.63 |
| Mtr.26988.1.S1_s_at | Hypothetical protein                     | 6.62 |
| Mtr.43497.1.S1_at   | Ethylene-forming-enzyme-like dioxygenase | 6.62 |
| Mtr.35704.1.S1_at   | Hypothetical protein                     | 6.62 |
| Mtr.49246.1.S1_at   | Zn-finger, MYND type                     | 6.62 |
| Mtr.35662.1.S1_at   | Hypothetical protein                     | 6.62 |
| Mtr.22599.1.S1_at   | Histidine decarboxylase                  | 6.60 |
| Mtr.17467.1.S1_at   | Serine/threonine protein kinase          | 6.58 |
| Mtr.26988.1.S1_at   | Hypothetical protein                     | 6.57 |
| Mtr.32312.1.S1_at   | WRKY transcription factor                | 6.57 |
| Mtr.28554.1.S1_at   | Hypothetical protein                     | 6.57 |
| Mtr.27753.1.S1_at   | L-lactate dehydrogenase                  | 6.57 |
| Mtr.11712.1.S1_at   | NADH dehydrogenase subunit 6             | 6.56 |
| Mtr.13139.1.S1_at   | Carbonate dehydratase-like protein       | 6.56 |
| Mtr.18037.1.S1_at   | Hypothetical protein                     | 6.55 |
| Mtr.9091.1.S1_at    | Hypothetical protein                     | 6.54 |
| Mtr.27812.1.S1_at   | Hypothetical protein                     | 6.54 |
| Mtr.33188.1.S1_at   | Hypothetical protein                     | 6.54 |
| Mtr.13318.1.S1_at   | Hypothetical protein                     | 6.53 |
| Mtr.13630.1.S1_at   | Membrane spanning protein                | 6.52 |
| Mtr.14785.1.S1_at   | Hypothetical protein                     | 6.51 |
| Mtr.49053.1.S1_s_at | Esterase/lipase/thioesterase             | 6.51 |
| Msa.1241.1.S1_at    | Hypothetical protein                     | 6.50 |
| Mtr.22444.1.S1_at   | Calcium-binding EF-hand family protein   | 6.50 |
| Mtr.4702.1.S1_s_at  | Fiber protein Fb1                        | 6.49 |
| Mtr.29535.1.S1_at   | Hypothetical protein                     | 6.49 |
| Mtr.14950.1.S1_s_at | Hypothetical protein                     | 6.48 |
| Mtr.35122.1.S1_at   | Hypothetical protein                     | 6.45 |
| Mtr.51646.1.S1_at   | Carbohydrate-binding protein             | 6.44 |
| Mtr.44270.1.S1_at   | Homocysteine S-methyltransferase 3       | 6.42 |
| Mtr.40782.1.S1_at   | Hypothetical protein                     | 6.41 |
| Mtr.40765.1.S1_at   | Hypothetical protein                     | 6.41 |
| Msa.996.1.S1_at     | Hypothetical protein                     | 6.39 |
| Mtr.35204.1.S1_at   | Glycine-rich protein                     | 6.36 |
| Mtr.40256.1.S1_at   | Hypothetical protein                     | 6.36 |
| Mtr.33678.1.S1_at   | Hypothetical protein                     | 6.35 |
| Mtr.2627.1.S1_at    | Hypothetical protein                     | 6.35 |
| Mtr.49481.1.S1_at   | Hypothetical protein                     | 6.34 |
| Mtr.43956.1.S1_at   | Zinc finger family protein               | 6.33 |
| Msa.1875.1.S1_at    | Hypothetical protein                     | 6.32 |
| Mtr.16851.1.S1_at   | Serine/threonine protein kinase          | 6.32 |
| Mtr.261.1.S1_at     | Hypothetical protein                     | 6.31 |

|                     |                                                              |      |
|---------------------|--------------------------------------------------------------|------|
| Mtr.12419.1.S1_s_at | 50S ribosomal protein L15                                    | 6.30 |
| Mtr.44843.1.S1_at   | Hypothetical protein                                         | 6.30 |
| Mtr.13643.1.S1_at   | Hypothetical protein                                         | 6.30 |
| Mtr.28498.1.S1_at   | S-ribonuclease binding protein                               | 6.28 |
| Mtr.40005.1.S1_at   | Hypothetical protein                                         | 6.27 |
| Mtr.45833.1.S1_s_at | Hypothetical protein                                         | 6.27 |
| Mtr.35960.1.S1_at   | 1, 3-beta-glucanase                                          | 6.27 |
| Mtr.38547.1.S1_at   | Tuber-specific and sucrose-responsive element binding factor | 6.25 |
| Mtr.12512.1.S1_at   | Glutathione S-transferase GST 24                             | 6.24 |
| Mtr.38711.1.S1_at   | GT-1 like transcription factor                               | 6.23 |
| Mtr.9034.1.S1_at    | Hypothetical protein                                         | 6.22 |
| Mtr.45270.1.S1_at   | Hypothetical protein                                         | 6.22 |
| Mtr.11502.1.S1_at   | Hypothetical protein                                         | 6.22 |
| Mtr.36679.1.S1_s_at | Hypothetical protein                                         | 6.20 |
| Mtr.44996.1.S1_at   | Acid phosphatase                                             | 6.19 |
| Msa.1414.1.S1_at    | Hypothetical protein                                         | 6.19 |
| Msa.2935.1.S1_at    | Hypothetical protein                                         | 6.18 |
| Mtr.31312.1.S1_at   | Receptor ser/thr protein kinase                              | 6.18 |
| Mtr.26304.1.S1_at   | Hypothetical protein                                         | 6.18 |
| Mtr.37277.1.S1_at   | Calcium-dependent protein kinase                             | 6.17 |
| Mtr.31273.1.S1_at   | Hypothetical protein                                         | 6.17 |
| Mtr.37284.1.S1_at   | Topoisomerase-like protein                                   | 6.17 |
| Mtr.24000.1.S1_at   | PPR repeat-containing protein                                | 6.17 |
| Mtr.6373.1.S1_at    | Acetyl-CoA carboxylase                                       | 6.16 |
| Mtr.4083.1.S1_at    | Hypothetical protein                                         | 6.16 |
| Mtr.43987.1.S1_at   | Serin carboxypeptidase-like protein                          | 6.16 |
| Mtr.25168.1.S1_at   | Leucine zipper-containing protein                            | 6.15 |
| Mtr.40982.1.S1_at   | Yippee-like protein                                          | 6.14 |
| Mtr.31327.1.S1_s_at | Protein kinase                                               | 6.14 |
| Mtr.42340.1.S1_at   | Importin alpha 2                                             | 6.14 |
| Mtr.5270.1.S1_at    | Hypothetical protein                                         | 6.13 |
| Mtr.18602.1.S1_at   | Pathogenesis-related transcriptional factor                  | 6.12 |
| Mtr.38258.1.S1_at   | Peroxisomal acetoacetyl-coenzyme A thiolase                  | 6.12 |
| Mtr.11530.1.S1_at   | Hypothetical protein                                         | 6.12 |
| Mtr.2340.1.S1_s_at  | Hypothetical protein                                         | 6.12 |
| Mtr.42770.1.S1_at   | Photosystem II 23 kDa polypeptide                            | 6.11 |
| Mtr.20185.1.S1_at   | Naringenin-chalcone synthase                                 | 6.11 |
| Mtr.31290.1.S1_at   | NHL repeat-containing protein                                | 6.11 |
| Mtr.33360.1.S1_at   | Hypothetical protein                                         | 6.11 |
| Mtr.12225.1.S1_at   | Plastidic ATP/ADP transporter                                | 6.10 |
| Mtr.46756.1.S1_s_at | Hypothetical protein                                         | 6.09 |
| Mtr.6637.1.S1_s_at  | Hypothetical protein                                         | 6.09 |
| Mtr.40751.1.S1_at   | Hypothetical protein                                         | 6.09 |
| Mtr.13087.1.S1_at   | Hypothetical protein                                         | 6.09 |
| Mtr.12290.1.S1_s_at | Proline dehydrogenase                                        | 6.09 |
| Mtr.13605.1.S1_at   | Hypothetical protein                                         | 6.08 |
| Mtr.29063.1.S1_at   | Hypothetical protein                                         | 6.08 |
| Mtr.12412.1.S1_at   | Glutamate dehydrogenase 1                                    | 6.07 |
| Mtr.7658.1.S1_at    | Hypothetical protein                                         | 6.06 |
| Mtr.41386.1.S1_at   | Hypothetical protein                                         | 6.05 |
| Mtr.40821.1.S1_at   | Abscisic acid-activated protein kinase                       | 6.05 |
| Mtr.32799.1.S1_at   | GTP-binding regulatory protein                               | 6.05 |
| Mtr.44393.1.S1_at   | Transformer-SR ribonucleoprotein                             | 6.05 |
| Mtr.17422.1.S1_at   | Amino acid/polyamine transporter I                           | 6.04 |

|                     |                                                              |      |
|---------------------|--------------------------------------------------------------|------|
| Mtr.27551.1.S1_at   | LOB domain protein 38                                        | 6.04 |
| Mtr.10581.1.S1_at   | Hypothetical protein                                         | 6.03 |
| Mtr.42389.1.S1_at   | Hypothetical protein                                         | 6.03 |
| Mtr.40320.1.S1_at   | Hypothetical protein                                         | 6.03 |
| Mtr.33391.1.S1_at   | Glycine-rich RNA binding protein                             | 6.01 |
| Mtr.23204.1.S1_x_at | Hypothetical protein                                         | 6.00 |
| Mtr.50912.1.S1_s_at | Hypothetical protein                                         | 5.99 |
| Mtr.8995.1.S1_at    | Hypothetical protein                                         | 5.99 |
| Msa.896.1.S1_at     | Hypothetical protein                                         | 5.99 |
| Mtr.11354.1.S1_at   | Bacterial-induced peroxidase                                 | 5.98 |
| Mtr.42039.1.S1_at   | Hypothetical protein                                         | 5.97 |
| Mtr.47936.1.S1_at   | Hypothetical protein                                         | 5.97 |
| Mtr.32211.1.S1_at   | Asparagine synthetase                                        | 5.96 |
| Mtr.13407.1.S1_at   | Hypothetical protein                                         | 5.96 |
| Mtr.7440.1.S1_at    | Hypothetical protein                                         | 5.94 |
| Mtr.44257.1.S1_s_at | Hypothetical protein                                         | 5.94 |
| Mtr.18642.1.S1_at   | Hypothetical protein                                         | 5.94 |
| Mtr.11333.1.S1_at   | Oxidase-like protein                                         | 5.94 |
| Mtr.44658.1.S1_at   | Hypothetical protein                                         | 5.94 |
| Mtr.25841.1.S1_at   | Plasma intrinsic protein                                     | 5.93 |
| Mtr.13259.1.S1_at   | Methylmalonate semi-aldehyde dehydrogenase                   | 5.93 |
| Mtr.38185.1.S1_at   | Hypothetical protein                                         | 5.92 |
| Mtr.41367.1.S1_at   | Hypothetical protein                                         | 5.92 |
| Mtr.22601.1.S1_at   | Endoxyloglucan transferase                                   | 5.91 |
| Mtr.20185.1.S1_x_at | Naringenin-chalcone synthase                                 | 5.91 |
| Mtr.3345.1.S1_at    | Hypothetical protein                                         | 5.91 |
| Mtr.41961.1.S1_at   | Hypothetical protein                                         | 5.90 |
| Mtr.4870.1.S1_s_at  | Hypothetical protein                                         | 5.90 |
| Mtr.35009.1.S1_at   | Hypothetical protein                                         | 5.89 |
| Mtr.10165.1.S1_at   | Ethylene receptor                                            | 5.89 |
| Mtr.27950.1.S1_at   | Hypothetical protein                                         | 5.89 |
| Mtr.28325.1.S1_at   | Branched-chain alpha-keto acid decarboxylase E1 beta subunit | 5.88 |
| Msa.2746.1.S1_at    | Hypothetical protein                                         | 5.87 |
| Mtr.21729.1.S1_at   | Serine/threonine protein kinase                              | 5.87 |
| Mtr.30703.1.S1_at   | Hypothetical protein                                         | 5.86 |
| Mtr.12946.1.S1_at   | Zinc finger (C3HC4-type RING finger) family protein          | 5.86 |
| Mtr.46085.1.S1_at   | Homeobox protein                                             | 5.86 |
| Mtr.38662.1.S1_at   | Hypothetical protein                                         | 5.85 |
| Mtr.16703.1.S1_at   | Disease resistance protein                                   | 5.85 |
| Mtr.43971.1.S1_at   | Hypothetical protein                                         | 5.85 |
| Mtr.39919.1.S1_at   | Protein kinase                                               | 5.85 |
| Mtr.35045.1.S1_s_at | Rab escort protein                                           | 5.84 |
| Mtr.37736.1.S1_at   | Hypothetical protein                                         | 5.83 |
| Mtr.10043.1.S1_at   | Wax synthase                                                 | 5.83 |
| Mtr.22708.1.S1_at   | Uridylyltransferase                                          | 5.82 |
| Mtr.38092.1.S1_at   | MAP kinase phosphatase                                       | 5.82 |
| Mtr.50494.1.S1_s_at | Hypothetical protein                                         | 5.82 |
| Mtr.43845.1.S1_at   | Hypothetical protein                                         | 5.82 |
| Mtr.18067.1.S1_at   | O-methyltransferase                                          | 5.81 |
| Mtr.33339.1.S1_at   | Hypothetical protein                                         | 5.81 |
| Mtr.31018.1.S1_at   | Hypothetical protein                                         | 5.81 |
| Mtr.9569.1.S1_at    | Thaumatococcus-like protein 1                                | 5.80 |
| Mtr.7058.1.S1_at    | Hypothetical protein                                         | 5.80 |
| Mtr.38811.1.S1_s_at | Nucleosome assembly protein 1-like protein 4                 | 5.80 |

|                     |                                                            |      |
|---------------------|------------------------------------------------------------|------|
| Mtr.4284.1.S1_at    | Hypothetical protein                                       | 5.80 |
| Mtr.29602.1.S1_at   | Hypothetical protein                                       | 5.78 |
| Mtr.43170.1.S1_s_at | Glutamate dehydrogenase 1                                  | 5.78 |
| Mtr.43272.1.S1_at   | Hypothetical protein                                       | 5.77 |
| Mtr.2282.1.S1_at    | Hypothetical protein                                       | 5.77 |
| Mtr.11713.1.S1_at   | BRASSINOSTEROID INSENSITIVE 1-associated receptor kinase 1 | 5.77 |
| Mtr.43705.1.S1_at   | Light repressible receptor protein kinase                  | 5.74 |
| Mtr.29666.1.S1_at   | Hypothetical protein                                       | 5.74 |
| Mtr.11080.1.S1_s_at | Glutathione S-transferase                                  | 5.73 |
| Mtr.8646.1.S1_at    | Nine-cis-epoxycarotenoid dioxygenase 1                     | 5.73 |
| Mtr.50704.1.S1_s_at | Aldehyde dehydrogenase                                     | 5.73 |
| Mtr.11986.1.S1_at   | WD40-repeat protein                                        | 5.73 |
| Mtr.12209.1.S1_at   | Phi-1 protein                                              | 5.73 |
| Mtr.44816.1.S1_at   | Hypothetical protein                                       | 5.73 |
| Mtr.52317.1.S1_at   | Hypothetical protein                                       | 5.72 |
| Mtr.35520.1.S1_at   | Hypothetical protein                                       | 5.72 |
| Mtr.15448.1.S1_at   | Gibberellin regulated protein                              | 5.72 |
| Msa.1311.1.S1_at    | Hypothetical protein                                       | 5.72 |
| Mtr.9098.1.S1_at    | CREG2-protein                                              | 5.71 |
| Mtr.37301.1.S1_at   | Cytochrome P450                                            | 5.70 |
| Mtr.39874.1.S1_at   | Hypothetical protein                                       | 5.70 |
| Mtr.16145.1.S1_s_at | Serine/threonine protein kinase                            | 5.69 |
| Mtr.51630.1.S1_s_at | Hypothetical protein                                       | 5.69 |
| Msa.1569.1.S1_at    | Hypothetical protein                                       | 5.68 |
| Mtr.13823.1.S1_at   | Hypothetical protein                                       | 5.68 |
| Mtr.13094.1.S1_at   | GTP-binding protein                                        | 5.67 |
| Mtr.42757.1.S1_at   | Hypothetical protein                                       | 5.67 |
| Mtr.31998.1.S1_at   | Epoxide hydrolase                                          | 5.66 |
| Mtr.10773.1.S1_at   | Wasl protein                                               | 5.66 |
| Mtr.35231.1.S1_at   | Pathogenesis-related protein                               | 5.66 |
| Mtr.32690.1.S1_at   | Nucleolar autoantigen-like protein                         | 5.66 |
| Mtr.36136.1.S1_at   | Hypothetical protein                                       | 5.65 |
| Mtr.10619.1.S1_at   | Hypothetical protein                                       | 5.65 |
| Mtr.33372.1.S1_at   | Hypothetical protein                                       | 5.64 |
| Mtr.44882.1.S1_at   | Hypothetical protein                                       | 5.64 |
| Mtr.14016.1.S1_at   | Hypothetical protein                                       | 5.64 |
| Mtr.16688.1.S1_at   | Mitochondrial import inner membrane translocase            | 5.63 |
| Mtr.43938.1.S1_at   | Protein kinase                                             | 5.63 |
| Mtr.2541.1.S1_at    | RuvB DNA helicase                                          | 5.63 |
| Mtr.35357.1.S1_at   | Auxin-regulated gene                                       | 5.63 |
| Mtr.47086.1.S1_s_at | Glucan 1,3-beta-glucosidase                                | 5.62 |
| Mtr.38375.1.S1_at   | Hypothetical protein                                       | 5.62 |
| Mtr.46410.1.S1_at   | Hypothetical protein                                       | 5.62 |
| Mtr.20704.1.S1_at   | Nucleosome assembly protein                                | 5.61 |
| Mtr.22597.1.S1_s_at | Serine decarboxylase                                       | 5.61 |
| Mtr.930.1.S1_at     | Hypothetical protein                                       | 5.61 |
| Mtr.21463.1.S1_at   | Hypothetical protein                                       | 5.60 |
| Mtr.43184.1.S1_at   | Hypothetical protein                                       | 5.59 |
| Mtr.18228.1.S1_at   | Gibberellin regulated protein                              | 5.59 |
| Mtr.9522.1.S1_at    | Hypothetical protein                                       | 5.58 |
| Mtr.9486.1.S1_at    | Zinc finger protein CONSTANS-LIKE 10                       | 5.58 |
| Mtr.5517.1.S1_at    | Hypothetical protein                                       | 5.57 |
| Mtr.39558.1.S1_at   | Gamma-gliadin precursor                                    | 5.57 |
| Mtr.51889.1.S1_s_at | Peptidase                                                  | 5.57 |

|                     |                                             |      |
|---------------------|---------------------------------------------|------|
| Mtr.11357.1.S1_at   | SNARE-interacting protein KEULE             | 5.56 |
| Mtr.39751.1.S1_at   | SRG1-like protein                           | 5.56 |
| Mtr.41599.1.S1_s_at | SNARE-interacting protein KEULE             | 5.56 |
| Mtr.24530.1.S1_s_at | Amino acid transporter                      | 5.56 |
| Mtr.44519.1.S1_at   | Hypothetical protein                        | 5.55 |
| Mtr.42984.1.S1_at   | Proline dehydrogenase                       | 5.55 |
| Mtr.38520.1.S1_s_at | Hypothetical protein                        | 5.55 |
| Mtr.37208.1.S1_at   | Hypothetical protein                        | 5.55 |
| Msa.2921.1.S1_at    | Hypothetical protein                        | 5.55 |
| Mtr.34860.1.S1_s_at | Ubiquitin-protein ligase                    | 5.54 |
| Mtr.13641.1.S1_at   | Alpha-mannosidase                           | 5.54 |
| Mtr.44228.1.S1_at   | Cyanophycinase                              | 5.54 |
| Msa.3094.1.S1_at    | Hypothetical protein                        | 5.53 |
| Mtr.5976.1.S1_at    | ERD1 protein                                | 5.52 |
| Mtr.33096.1.S1_at   | Heterogeneous nuclear ribonucleoprotein     | 5.52 |
| Mtr.49473.1.S1_at   | Aldehyde dehydrogenase                      | 5.51 |
| Mtr.16634.1.S1_s_at | Hypothetical protein                        | 5.50 |
| Mtr.24464.1.S1_at   | Receptor-like protein kinase                | 5.50 |
| Mtr.44587.1.S1_at   | Peroxisomal acetoacetyl-coenzyme A thiolase | 5.50 |
| Mtr.37501.1.S1_at   | Isoliquiritigenin 2'-O-methyltransferase    | 5.49 |
| Mtr.11544.1.S1_at   | Receptor-like kinase                        | 5.49 |
| Mtr.32566.1.S1_s_at | DEAD box protein                            | 5.49 |
| Mtr.20751.1.S1_at   | bZIP transcription factor                   | 5.48 |
| Mtr.33428.1.S1_at   | Hypothetical protein                        | 5.48 |
| Mtr.42907.1.S1_at   | Hypothetical protein                        | 5.47 |
| Mtr.30257.1.S1_at   | Hypothetical protein                        | 5.47 |
| Msa.3040.1.S1_at    | Hypothetical protein                        | 5.47 |
| Mtr.42269.1.S1_at   | Transcription factor (E2F)                  | 5.46 |
| Mtr.38566.1.S1_at   | Hypothetical protein                        | 5.46 |
| Mtr.1851.1.S1_s_at  | Secreted glycoprotein 3                     | 5.46 |
| Mtr.39065.1.S1_at   | Hypothetical protein                        | 5.45 |
| Mtr.8407.1.S1_at    | Hypothetical protein                        | 5.45 |
| Mtr.41839.1.S1_at   | Hypothetical protein                        | 5.45 |
| Mtr.9901.1.S1_at    | Receptor-like kinase                        | 5.45 |
| Mtr.7373.1.S1_at    | Hypothetical protein                        | 5.45 |
| Mtr.12538.1.S1_at   | Hypothetical protein                        | 5.44 |
| Mtr.15339.1.S1_at   | Homeodomain-like proein                     | 5.44 |
| Mtr.12609.1.S1_at   | Acyl CoA oxidase                            | 5.43 |
| Mtr.40002.1.S1_at   | Hydroxymethylglutaryl-CoA lyase             | 5.43 |
| Mtr.12456.1.S1_at   | AP2-related transcription factor            | 5.43 |
| Mtr.51562.1.S1_at   | No apical meristem (NAM) protein            | 5.42 |
| Mtr.10147.1.S1_at   | Auxin-induced SAUR-like protein             | 5.42 |
| Msa.1621.1.S1_at    | Hypothetical protein                        | 5.42 |
| Mtr.30853.1.S1_at   | Sugar transporter                           | 5.41 |
| Mtr.25254.1.S1_at   | DnaJ-like protein                           | 5.41 |
| Mtr.19347.1.S1_at   | Major intrinsic protein                     | 5.40 |
| Mtr.13769.1.S1_at   | Exonuclease                                 | 5.40 |
| Mtr.9041.1.S1_s_at  | Hypothetical protein                        | 5.40 |
| Mtr.40284.1.S1_at   | Hypothetical protein                        | 5.40 |
| Mtr.6811.1.S1_at    | Glutathione S-transferase GST 17            | 5.39 |
| Mtr.13682.1.S1_at   | Alpha-mannosidase                           | 5.39 |
| Mtr.25966.1.S1_at   | Hypothetical protein                        | 5.39 |
| Mtr.51296.1.S1_at   | SPLa/RYanodine receptor                     | 5.38 |
| Mtr.40203.1.S1_at   | Aldehyde dehydrogenase (NAD <sup>+</sup> )  | 5.38 |



|                     |                                                 |      |
|---------------------|-------------------------------------------------|------|
| Mtr.27318.1.S1_at   | Fructose-bisphosphate aldolase                  | 5.37 |
| Mtr.6545.1.S1_at    | Hypothetical protein                            | 5.37 |
| Mtr.32188.1.S1_x_at | Chalcone synthase 9                             | 5.37 |
| Mtr.48688.1.S1_at   | DNA-binding WRKY                                | 5.37 |
| Mtr.13223.1.S1_at   | Alpha-mannosidase                               | 5.36 |
| Mtr.48718.1.S1_at   | Galactose-binding protein                       | 5.36 |
| Mtr.13645.1.S1_at   | Hypothetical protein                            | 5.36 |
| Mtr.10805.1.S1_at   | Avr9/Cf-9 rapidly elicited protein              | 5.35 |
| Mtr.20378.1.S1_at   | Sugar transporter                               | 5.35 |
| Mtr.42600.1.S1_at   | Hypothetical protein                            | 5.35 |
| Mtr.48353.1.S1_at   | Alpha fucosidase                                | 5.35 |
| Mtr.43706.1.S1_at   | Hypothetical protein                            | 5.35 |
| Mtr.43917.1.S1_at   | Hypothetical protein                            | 5.35 |
| Mtr.7313.1.S1_at    | 50S ribosomal protein L3-2                      | 5.35 |
| Mtr.37169.1.S1_at   | Hypothetical protein                            | 5.34 |
| Mtr.34217.1.S1_at   | Ss-galactosidase precursor                      | 5.34 |
| Mtr.43784.1.S1_at   | Hypothetical protein                            | 5.34 |
| Msa.2542.1.S1_at    | Hypothetical protein                            | 5.34 |
| Mtr.5840.1.S1_at    | Hypothetical protein                            | 5.33 |
| Mtr.18295.1.S1_at   | Zinc-containing alcohol dehydrogenase           | 5.33 |
| Msa.1009.1.S1_at    | Hypothetical protein                            | 5.33 |
| Mtr.3156.1.S1_at    | Hypothetical protein                            | 5.32 |
| Mtr.12470.1.S1_at   | Syringolide-induced protein                     | 5.32 |
| Msa.937.1.S1_at     | Hypothetical protein                            | 5.31 |
| Mtr.30738.1.S1_at   | Uracil phosphoribosyltransferase 1              | 5.31 |
| Mtr.10703.1.S1_at   | Kinesin-like protein KIF13B                     | 5.31 |
| Mtr.29510.1.S1_at   | Hypothetical protein                            | 5.31 |
| Mtr.17966.1.S1_at   | Leucine-rich repeat protein                     | 5.31 |
| Mtr.11572.1.S1_at   | Receptor-like protein kinase                    | 5.31 |
| Mtr.51042.1.S1_at   | Hypothetical protein                            | 5.31 |
| Mtr.9214.1.S1_at    | Hypothetical protein                            | 5.30 |
| Mtr.44713.1.S1_at   | Amino acid transporter-like protein             | 5.30 |
| Mtr.9055.1.S1_at    | Branched-chain alpha-keto acid decarboxylase E1 | 5.30 |
| Mtr.42023.1.S1_at   | Lipase SIL1                                     | 5.30 |
| Mtr.42185.1.S1_at   | Hypothetical protein                            | 5.30 |
| Mtr.44573.1.S1_at   | GPI-anchored protein                            | 5.30 |
| Mtr.41983.1.S1_at   | Glucosyltransferase-7                           | 5.29 |
| Mtr.10514.1.S1_at   | Acyl-activating enzyme                          | 5.29 |
| Mtr.45031.1.S1_at   | Proteinase                                      | 5.29 |
| Mtr.6156.1.S1_at    | Cytochrome oxidase subunit II                   | 5.29 |
| Mtr.26629.1.S1_at   | CCR4-associated factor 1-related protein        | 5.29 |
| Mtr.21708.1.S1_at   | lysophospholipase                               | 5.29 |
| Mtr.38635.1.S1_at   | Peroxidase 10                                   | 5.28 |
| Mtr.13033.1.S1_at   | Hypothetical protein                            | 5.28 |
| Mtr.9032.1.S1_at    | Aspartyl protease                               | 5.28 |
| Msa.1202.1.S1_at    | Hypothetical protein                            | 5.28 |
| Mtr.52124.1.S1_s_at | Phosphate-induced protein 1                     | 5.27 |
| Mtr.29714.1.S1_at   | Hypothetical protein                            | 5.26 |
| Mtr.38945.1.S1_at   | Hypothetical protein                            | 5.26 |
| Mtr.6352.1.S1_s_at  | Alternative oxidase 3                           | 5.25 |
| Mtr.42223.1.S1_at   | Hypothetical protein                            | 5.25 |
| Msa.3172.1.S1_at    | Hypothetical protein                            | 5.25 |
| Mtr.24341.1.S1_at   | Hypothetical protein                            | 5.25 |
| Mtr.43229.1.S1_at   | Syringolide-induced protein 14-1-1              | 5.25 |

|                     |                                                       |      |
|---------------------|-------------------------------------------------------|------|
| Mtr.37224.1.S1_at   | Hydroxyproline-rich glycoprotein                      | 5.25 |
| Mtr.45563.1.S1_at   | PDR9 ABC transporter                                  | 5.24 |
| Msa.820.1.S1_at     | Hypothetical protein                                  | 5.24 |
| Mtr.11512.1.S1_at   | Hypothetical protein                                  | 5.24 |
| Mtr.43707.1.S1_at   | Hypothetical protein                                  | 5.24 |
| Mtr.33785.1.S1_at   | Hypothetical protein                                  | 5.24 |
| Mtr.5950.1.S1_s_at  | Zinc finger protein                                   | 5.24 |
| Mtr.12652.1.S1_s_at | Hypothetical protein                                  | 5.23 |
| Mtr.21035.1.S1_at   | Sugar transporter                                     | 5.23 |
| Mtr.43346.1.S1_at   | Nodulin-like protein                                  | 5.23 |
| Mtr.34775.1.S1_at   | Hypothetical protein                                  | 5.22 |
| Mtr.41503.1.S1_at   | Hypothetical protein                                  | 5.21 |
| Mtr.11219.1.S1_at   | Hypothetical protein                                  | 5.21 |
| Mtr.32564.1.S1_at   | Hypothetical protein                                  | 5.21 |
| Mtr.9106.1.S1_at    | RuvB DNA helicase                                     | 5.20 |
| Mtr.17135.1.S1_at   | ATPase, E1-E2 type                                    | 5.20 |
| Mtr.14439.1.S1_at   | Hypothetical protein                                  | 5.19 |
| Mtr.48475.1.S1_at   | Growth regulator like protein                         | 5.19 |
| Mtr.34121.1.S1_at   | Hypothetical protein                                  | 5.19 |
| Mtr.9031.1.S1_at    | Nucellin-like aspartic protease                       | 5.18 |
| Mtr.40627.1.S1_at   | Hypothetical protein                                  | 5.18 |
| Mtr.45053.1.S1_at   | Hypothetical protein                                  | 5.17 |
| Mtr.10388.1.S1_at   | UDP-glucose 4-epimerase                               | 5.17 |
| Msa.1505.1.S1_at    | Hypothetical protein                                  | 5.17 |
| Mtr.39454.1.S1_at   | Enod8-like protein                                    | 5.16 |
| Mtr.49418.1.S1_s_at | Hypothetical protein                                  | 5.16 |
| Mtr.21016.1.S1_at   | Hypothetical protein                                  | 5.16 |
| Mtr.7966.1.S1_at    | Hypothetical protein                                  | 5.15 |
| Mtr.35681.1.S1_at   | Metal-dependent amidase/aminoacylase/carboxypeptidase | 5.15 |
| Mtr.2218.1.S1_at    | Ubiquitin-protein ligase                              | 5.14 |
| Mtr.18117.1.S1_at   | Hypothetical protein                                  | 5.13 |
| Mtr.5932.1.S1_at    | Hypothetical protein                                  | 5.13 |
| Mtr.40239.1.S1_at   | Phosphoenolpyruvate carboxykinase                     | 5.13 |
| Mtr.7011.1.S1_at    | Hypothetical protein                                  | 5.13 |
| Mtr.44444.1.S1_at   | MADS box interactor                                   | 5.13 |
| Mtr.23414.1.S1_at   | Hypothetical protein                                  | 5.13 |
| Mtr.17255.1.S1_at   | Formyl transferase                                    | 5.12 |
| Mtr.41441.1.S1_at   | Hypothetical protein                                  | 5.12 |
| Mtr.50038.1.S1_at   | No apical meristem (NAM) protein                      | 5.12 |
| Mtr.12703.1.S1_at   | Hypothetical protein                                  | 5.12 |
| Mtr.27180.1.S1_at   | Ntdin                                                 | 5.11 |
| Mtr.10005.1.S1_at   | Hypothetical protein                                  | 5.11 |
| Mtr.2502.1.S1_s_at  | Hypothetical protein                                  | 5.11 |
| Mtr.11704.1.S1_at   | Protein phosphatase 2C                                | 5.11 |
| Mtr.29342.1.S1_at   | Hypothetical protein                                  | 5.10 |
| Mtr.10063.1.S1_at   | Cycloidea protein                                     | 5.10 |
| Mtr.1800.1.S1_at    | Cytochrome b                                          | 5.10 |
| Mtr.40005.1.S1_s_at | Hypothetical protein                                  | 5.09 |
| Mtr.15180.1.S1_at   | Glucose-6-phosphate dehydrogenase                     | 5.09 |
| Mtr.28045.1.S1_at   | Hypothetical protein                                  | 5.09 |
| Mtr.82.1.S1_at      | STS14 protein                                         | 5.08 |
| Mtr.44073.1.S1_at   | En/Spm-like transposon protein                        | 5.08 |
| Mtr.19347.1.S1_s_at | Major intrinsic protein                               | 5.08 |
| Mtr.1526.1.S1_a_at  | Hypothetical protein                                  | 5.08 |

|                     |                                                               |      |
|---------------------|---------------------------------------------------------------|------|
| Mtr.21501.1.S1_at   | Zn-finger, RING                                               | 5.08 |
| Mtr.15228.1.S1_s_at | Pre-mRNA processing ribonucleoprotein                         | 5.08 |
| Mtr.43343.1.S1_at   | Hypothetical protein                                          | 5.08 |
| Mtr.36359.1.S1_s_at | Hypothetical protein                                          | 5.08 |
| Mtr.40917.1.S1_at   | SPF1 protein                                                  | 5.07 |
| Mtr.2604.1.S1_x_at  | Nodulin                                                       | 5.07 |
| Mtr.43391.1.S1_at   | Hypothetical protein                                          | 5.06 |
| Mtr.41551.1.S1_at   | SCARECROW-like protein                                        | 5.06 |
| Msa.2722.1.S1_at    | Hypothetical protein                                          | 5.06 |
| Mtr.38570.1.S1_at   | YGL010w-like protein                                          | 5.06 |
| Mtr.25922.1.S1_at   | Hypothetical protein                                          | 5.05 |
| Mtr.34967.1.S1_at   | ERD1 protein                                                  | 5.04 |
| Mtr.40789.1.S1_at   | DNA-binding protein                                           | 5.04 |
| Mtr.40168.1.S1_at   | Phenylalanine ammonia-lyase 2                                 | 5.03 |
| Mtr.45088.1.S1_at   | Vesicle transport v-SNARE 13                                  | 5.02 |
| Mtr.32566.1.S1_at   | DEAD box protein                                              | 5.02 |
| Mtr.10930.1.S1_at   | Caffeoyl-CoA O-methyltransferase 5                            | 5.01 |
| Mtr.37779.1.S1_at   | Formate dehydrogenase                                         | 5.01 |
| Mtr.41029.1.S1_s_at | Ankyrin repeat-containing protein                             | 5.01 |
| Mtr.7014.1.S1_at    | Peptide transporter 1                                         | 5.00 |
| Mtr.35824.1.S1_at   | GATA-1 zinc finger protein                                    | 5.00 |
| Mtr.12958.1.S1_at   | Hypothetical protein                                          | 5.00 |
| Mtr.20288.1.S1_at   | Transcriptional factor                                        | 5.00 |
| Mtr.40050.1.S1_at   | Rab escort protein                                            | 4.99 |
| Mtr.45159.1.S1_at   | Hypothetical protein                                          | 4.99 |
| Mtr.6892.1.S1_at    | S glycoprotein                                                | 4.98 |
| Mtr.41497.1.S1_at   | ARIADNE-like protein                                          | 4.97 |
| Mtr.39144.1.S1_at   | WD40-repeat protein                                           | 4.97 |
| Mtr.1676.1.S1_at    | Hypothetical protein                                          | 4.95 |
| Mtr.42222.1.S1_at   | Hypothetical protein                                          | 4.95 |
| Mtr.42418.1.S1_at   | Phospholipase D                                               | 4.95 |
| Mtr.33541.1.S1_x_at | Asparagine synthase (glutamine-hydrolysing)                   | 4.95 |
| Mtr.26369.1.S1_at   | Hypothetical protein                                          | 4.94 |
| Mtr.9031.1.S1_s_at  | Nucellin-like aspartic protease                               | 4.94 |
| Mtr.7227.1.S1_at    | Hypothetical protein                                          | 4.94 |
| Mtr.8789.1.S1_s_at  | Formate dehydrogenase                                         | 4.94 |
| Mtr.10565.1.S1_at   | Hypothetical protein                                          | 4.93 |
| Mtr.7253.1.S1_at    | Snakin-1                                                      | 4.93 |
| Mtr.12662.1.S1_at   | Patatin-like protein 1                                        | 4.93 |
| Mtr.48506.1.S1_at   | Hypothetical protein                                          | 4.93 |
| Mtr.25059.1.S1_at   | WD-40 repeat protein                                          | 4.93 |
| Mtr.39176.1.S1_at   | Hypothetical protein                                          | 4.93 |
| Mtr.1952.1.S1_at    | Hypothetical protein                                          | 4.93 |
| Mtr.40278.1.S1_at   | Glutathione S-transferase                                     | 4.92 |
| Mtr.9101.1.S1_at    | PDR-like ABC transporter                                      | 4.92 |
| Mtr.17625.1.S1_at   | Zn-finger, RING                                               | 4.92 |
| Mtr.16195.1.S1_at   | Hypothetical protein                                          | 4.91 |
| Mtr.22834.1.S1_at   | Symbiotic ammonium transporter                                | 4.91 |
| Mtr.1430.1.S1_at    | Hypothetical protein                                          | 4.91 |
| Mtr.40547.1.S1_at   | bZIP transcription factor                                     | 4.91 |
| Mtr.47187.1.S1_at   | Glyoxysomal fatty acid beta-oxidation multifunctional protein | 4.90 |
| Mtr.14250.1.S1_at   | Arf GTPase activating protein                                 | 4.90 |
| Mtr.13273.1.S1_at   | TINY-like protein                                             | 4.90 |
| Mtr.49791.1.S1_at   | Auxin responsive SAUR protein                                 | 4.90 |

|                     |                                                      |      |
|---------------------|------------------------------------------------------|------|
| Mtr.24888.1.S1_at   | Hypothetical protein                                 | 4.90 |
| Mtr.29620.1.S1_at   | Hypothetical protein                                 | 4.89 |
| Mtr.47932.1.S1_at   | Xylulose kinase                                      | 4.89 |
| Mtr.27992.1.S1_at   | Hypothetical protein                                 | 4.88 |
| Mtr.13270.1.S1_at   | Hypothetical protein                                 | 4.88 |
| Mtr.45741.1.S1_at   | Cytochrome P450                                      | 4.88 |
| Mtr.16691.1.S1_at   | Myb, DNA-binding protein                             | 4.88 |
| Mtr.35927.1.S1_at   | Maturase K                                           | 4.87 |
| Mtr.27097.1.S1_at   | Hypothetical protein                                 | 4.87 |
| Mtr.42872.1.S1_at   | Hypothetical protein                                 | 4.87 |
| Mtr.39139.1.S1_at   | Pathogenesis-related protein 4A                      | 4.87 |
| Mtr.42610.1.S1_at   | Acyl-activating enzyme 17                            | 4.87 |
| Mtr.11677.1.S1_at   | ERD1 protein                                         | 4.87 |
| Mtr.28295.1.S1_s_at | Female-specific transformer protein                  | 4.87 |
| Mtr.9440.1.S1_at    | Hypothetical protein                                 | 4.86 |
| Mtr.43134.1.S1_at   | Fructose-bisphosphate aldolase-like protein          | 4.86 |
| Msa.2848.1.S1_at    | Hypothetical protein                                 | 4.86 |
| Mtr.44386.1.S1_at   | Hypothetical protein                                 | 4.86 |
| Mtr.31327.1.S1_at   | Protein kinase                                       | 4.85 |
| Mtr.20008.1.S1_at   | Ankyrin Repeat Protein                               | 4.85 |
| Mtr.13110.1.S1_at   | Fiber protein Fb2                                    | 4.84 |
| Mtr.2465.1.S1_at    | Hypothetical protein                                 | 4.84 |
| Mtr.45583.1.S1_at   | Hypothetical protein                                 | 4.84 |
| Mtr.37425.1.S1_at   | Transcription factor WRKY10                          | 4.84 |
| Mtr.37928.1.S1_at   | Thiamin pyrophosphokinase 1                          | 4.84 |
| Mtr.43834.1.S1_at   | DEAD-Box RNA helicase-like protein                   | 4.84 |
| Msa.1103.1.S1_at    | Hypothetical protein                                 | 4.83 |
| Mtr.17513.1.S1_at   | bZIP transcription factor                            | 4.83 |
| Msa.2554.1.S1_at    | Hypothetical protein                                 | 4.83 |
| Mtr.42795.1.S1_at   | Glutamate synthase [NADH]                            | 4.83 |
| Mtr.10416.1.S1_at   | 3-deoxy-D-arabino-heptulosonate 7-phosphate synthase | 4.83 |
| Mtr.31944.1.S1_at   | Hypothetical protein                                 | 4.83 |
| Mtr.28526.1.S1_at   | Hypothetical protein                                 | 4.83 |
| Mtr.233.1.S1_at     | Patatin-related protein                              | 4.82 |
| Mtr.7448.1.S1_s_at  | Hypothetical protein                                 | 4.82 |
| Mtr.38097.1.S1_at   | Hypothetical protein                                 | 4.82 |
| Mtr.35968.1.S1_at   | UDP-glucosyltransferase                              | 4.81 |
| Mtr.33601.1.S1_s_at | Nodulin26-like major intrinsic protein               | 4.81 |
| Mtr.14627.1.S1_at   | Hypothetical protein                                 | 4.81 |
| Mtr.14281.1.S1_at   | Hypothetical protein                                 | 4.81 |
| Mtr.44727.1.S1_at   | Timing of CAB expression 1                           | 4.80 |
| Mtr.9417.1.S1_at    | Beta-galactosidase                                   | 4.79 |
| Mtr.45463.1.S1_at   | Xyloglucan endotransglucosylase/hydrolase            | 4.78 |
| Mtr.39092.1.S1_at   | Cytochrome oxidase subunit III                       | 4.78 |
| Mtr.44597.1.S1_at   | Female-specific transformer protein                  | 4.78 |
| Mtr.25525.1.S1_at   | Hypothetical protein                                 | 4.78 |
| Mtr.40433.1.S1_at   | Hypothetical protein                                 | 4.78 |
| Mtr.16824.1.S1_at   | Heavy metal transport/detoxification protein         | 4.78 |
| Mtr.49791.1.S1_x_at | Auxin responsive SAUR protein                        | 4.77 |
| Mtr.1343.1.S1_at    | Hypothetical protein                                 | 4.77 |
| Msa.2952.1.S1_at    | Hypothetical protein                                 | 4.76 |
| Mtr.17517.1.S1_at   | Hypothetical protein                                 | 4.76 |
| Mtr.24465.1.S1_at   | Receptor-like protein kinase                         | 4.76 |
| Mtr.12018.1.S1_at   | Hypothetical protein                                 | 4.76 |

|                     |                                                            |      |
|---------------------|------------------------------------------------------------|------|
| Mtr.16783.1.S1_at   | Hypothetical protein                                       | 4.75 |
| Mtr.36311.1.S1_at   | Hypothetical protein                                       | 4.75 |
| Mtr.38129.1.S1_at   | RNA-binding protein                                        | 4.75 |
| Mtr.44417.1.S1_at   | Disease resistance protein                                 | 4.74 |
| Mtr.15278.1.S1_s_at | Zn-finger, C2H2 type                                       | 4.74 |
| Mtr.37771.1.S1_at   | Ser/Thr protein kinase                                     | 4.74 |
| Mtr.16301.1.S1_at   | Hypothetical protein                                       | 4.74 |
| Mtr.48476.1.S1_at   | Hypothetical protein                                       | 4.74 |
| Mtr.10817.1.S1_at   | Hypothetical protein                                       | 4.74 |
| Mtr.1955.1.S1_at    | Protein phosphatase 2C                                     | 4.73 |
| Mtr.43499.1.S1_at   | Hypothetical protein                                       | 4.73 |
| Mtr.10628.1.S1_at   | Aldehyde 5-hydroxylase                                     | 4.73 |
| Mtr.41861.1.S1_at   | Acetyl-CoA carboxylase                                     | 4.72 |
| Mtr.38368.1.S1_at   | Hypothetical protein                                       | 4.72 |
| Mtr.8669.1.S1_at    | Hypothetical protein                                       | 4.72 |
| Mtr.5877.1.S1_at    | Thioredoxin 2                                              | 4.72 |
| Mtr.10798.1.S1_at   | Hypothetical protein                                       | 4.72 |
| Mtr.49047.1.S1_at   | Glycoside hydrolase                                        | 4.71 |
| Mtr.13491.1.S1_at   | Beta xylosidase                                            | 4.71 |
| Mtr.41182.1.S1_at   | GTP-binding protein-like (Ras-related GTP-binding protein) | 4.71 |
| Mtr.40058.1.S1_x_at | Nodulin                                                    | 4.70 |
| Mtr.27194.1.S1_at   | Hypothetical protein                                       | 4.69 |
| Mtr.41299.1.S1_s_at | Hypothetical protein                                       | 4.69 |
| Mtr.8701.1.S1_at    | Leucine rich repeat protein                                | 4.69 |
| Mtr.11112.1.S1_at   | Hypothetical protein                                       | 4.69 |
| Msa.2665.1.S1_at    | Hypothetical protein                                       | 4.68 |
| Mtr.34901.1.S1_s_at | PDR-like ABC transporter                                   | 4.68 |
| Mtr.18646.1.S1_at   | Hypothetical protein                                       | 4.68 |
| Mtr.7638.1.S1_at    | Endo-1,3-beta-glucanase                                    | 4.68 |
| Mtr.21466.1.S1_at   | Serine/threonine protein kinase                            | 4.68 |
| Mtr.37996.1.S1_at   | Serine/threonine-specific receptor protein kinase          | 4.67 |
| Mtr.12123.1.S1_at   | Hypothetical protein                                       | 4.67 |
| Mtr.21119.1.S1_at   | Phytochrome kinase                                         | 4.67 |
| Mtr.40272.1.S1_at   | Nodulin-like protein                                       | 4.67 |
| Mtr.10959.1.S1_at   | Nodulin-like protein                                       | 4.67 |
| Mtr.12835.1.S1_at   | Hypothetical protein                                       | 4.66 |
| Mtr.34018.1.S1_at   | S-receptor kinase                                          | 4.66 |
| Mtr.37913.1.S1_at   | Acyl-CoA oxidase                                           | 4.66 |
| Mtr.13391.1.S1_at   | Hypothetical protein                                       | 4.64 |
| Mtr.22558.1.S1_s_at | Hydroxymethylglutaryl-CoA lyase                            | 4.64 |
| Mtr.41607.1.S1_at   | Hypothetical protein                                       | 4.64 |
| Msa.2783.1.S1_at    | Hypothetical protein                                       | 4.64 |
| Mtr.51656.1.S1_at   | Ubiquitin-associated protein                               | 4.63 |
| Mtr.17903.1.S1_at   | Hypothetical protein                                       | 4.63 |
| Mtr.6178.1.S1_at    | Alanine racemase                                           | 4.62 |
| Mtr.51564.1.S1_at   | Galactose-binding protein                                  | 4.62 |
| Mtr.3183.1.S1_at    | Hypothetical protein                                       | 4.62 |
| Msa.2215.1.S1_at    | Hypothetical protein                                       | 4.62 |
| Mtr.10974.1.S1_at   | Hypothetical protein                                       | 4.62 |
| Mtr.16912.1.S1_at   | WD-40 repeat                                               | 4.62 |
| Mtr.11550.1.S1_at   | Diacylglycerol kinase                                      | 4.62 |
| Mtr.11633.1.S1_at   | Transducin-like protein                                    | 4.62 |
| Mtr.8936.1.S1_at    | Zinc finger protein                                        | 4.62 |
| Mtr.9577.1.S1_at    | Hypothetical protein                                       | 4.61 |

|                     |                                                |      |
|---------------------|------------------------------------------------|------|
| Mtr.20630.1.S1_at   | Glycoside hydrolase                            | 4.61 |
| Mtr.34632.1.S1_s_at | Seven transmembrane helix receptor             | 4.61 |
| Mtr.37677.1.S1_s_at | Hypothetical protein                           | 4.61 |
| Mtr.41977.1.S1_at   | Hypothetical protein                           | 4.60 |
| Mtr.12525.1.S1_at   | Chitinase                                      | 4.60 |
| Mtr.11287.1.S1_at   | Hypothetical protein                           | 4.60 |
| Mtr.16728.1.S1_at   | Fibrillarlin                                   | 4.60 |
| Mtr.15054.1.S1_at   | Thaumatococin                                  | 4.60 |
| Msa.2884.1.S1_at    | Hypothetical protein                           | 4.60 |
| Mtr.27919.1.S1_at   | Hypothetical protein                           | 4.60 |
| Mtr.41745.1.S1_at   | General negative transcription regulator       | 4.60 |
| Mtr.44169.1.S1_at   | Spermatid-specific protein T1                  | 4.60 |
| Mtr.38993.1.S1_at   | ERD1 protein                                   | 4.59 |
| Mtr.32458.1.S1_at   | Hypothetical protein                           | 4.59 |
| Mtr.10976.1.S1_at   | WRKY transcription factor                      | 4.59 |
| Mtr.15850.1.S1_at   | Glycine-rich RNA binding protein               | 4.59 |
| Mtr.42215.1.S1_at   | Hypothetical protein                           | 4.59 |
| Mtr.52198.1.S1_at   | Bacterial regulatory factor                    | 4.58 |
| Mtr.33658.1.S1_at   | Hypothetical protein                           | 4.58 |
| Mtr.12051.1.S1_at   | Hypothetical protein                           | 4.57 |
| Mtr.8674.1.S1_at    | Serine/threonine protein phosphatase PP1       | 4.57 |
| Msa.1485.1.S1_at    | Hypothetical protein                           | 4.57 |
| Mtr.40110.1.S1_at   | Ribosomal protein S27                          | 4.56 |
| Mtr.50547.1.S1_at   | RHO protein GDP dissociation inhibitor         | 4.56 |
| Mtr.44843.1.S1_s_at | Hypothetical protein                           | 4.55 |
| Mtr.38894.1.S1_s_at | Hypothetical protein                           | 4.55 |
| Mtr.45221.1.S1_at   | Hypothetical protein                           | 4.55 |
| Mtr.29044.1.S1_at   | Hypothetical protein                           | 4.55 |
| Mtr.39305.1.S1_at   | Heat shock transcription factor 34             | 4.54 |
| Mtr.457.1.S1_s_at   | Hypothetical protein                           | 4.54 |
| Mtr.2673.1.S1_s_at  | Hypothetical protein                           | 4.54 |
| Mtr.13646.1.S1_at   | Hypothetical protein                           | 4.54 |
| Msa.1821.1.S1_at    | Hypothetical protein                           | 4.54 |
| Mtr.39403.1.S1_at   | Receptor-like serine/threonine kinase          | 4.53 |
| Mtr.10389.1.S1_s_at | UDP-glucose 4-epimerase                        | 4.53 |
| Mtr.47087.1.S1_at   | Glucan 1,3-beta-glucosidase                    | 4.53 |
| Mtr.27396.1.S1_at   | Isoliquiritigenin 2'-O-methyltransferase       | 4.53 |
| Mtr.46097.1.S1_at   | Hypothetical protein                           | 4.53 |
| Mtr.1018.1.S1_s_at  | GDP-mannose transporter                        | 4.53 |
| Mtr.31455.1.S1_at   | Hypothetical protein                           | 4.52 |
| Mtr.28840.1.S1_at   | TFIIIE-beta                                    | 4.52 |
| Mtr.46013.1.S1_at   | 4Fe-4S ferredoxin, iron-sulfur binding protein | 4.52 |
| Mtr.6104.1.S1_at    | Short chain alcohol dehydrogenase              | 4.52 |
| Mtr.42571.1.S1_at   | MutT domain protein                            | 4.52 |
| Mtr.1921.1.S1_at    | Hypothetical protein                           | 4.51 |
| Mtr.42067.1.S1_s_at | Hypothetical protein                           | 4.51 |
| Mtr.21478.1.S1_s_at | Hypothetical protein                           | 4.51 |
| Mtr.38615.1.S1_at   | Hypothetical protein                           | 4.51 |
| Mtr.41789.1.S1_at   | Hypothetical protein                           | 4.50 |
| Mtr.10984.1.S1_at   | Hypothetical protein                           | 4.50 |
| Mtr.9984.1.S1_at    | Acyl-activating enzyme 17                      | 4.50 |
| Mtr.43041.1.S1_at   | Hexokinase                                     | 4.50 |
| Mtr.43706.1.S1_s_at | Hypothetical protein                           | 4.50 |
| Msa.1940.1.S1_at    | Hypothetical protein                           | 4.50 |

|                     |                                                     |      |
|---------------------|-----------------------------------------------------|------|
| Mtr.24434.1.S1_at   | Hypothetical protein                                | 4.49 |
| Mtr.35865.1.S1_at   | Cdc2MsC protein                                     | 4.48 |
| Mtr.51989.1.S1_s_at | EAG/ELK/ERG potassium channel                       | 4.48 |
| Mtr.6197.1.S1_s_at  | Root nodule extensin                                | 4.48 |
| Mtr.12208.1.S1_at   | Pentameric polyubiquitin                            | 4.48 |
| Mtr.49405.1.S1_s_at | TIR; Disease resistance protein                     | 4.48 |
| Mtr.16854.1.S1_x_at | Protein kinase                                      | 4.48 |
| Mtr.4958.1.S1_at    | Hypothetical protein                                | 4.47 |
| Mtr.21905.1.S1_at   | Hypothetical protein                                | 4.47 |
| Mtr.19752.1.S1_at   | Hypothetical protein                                | 4.47 |
| Mtr.41841.1.S1_at   | Hypothetical protein                                | 4.47 |
| Mtr.12817.1.S1_at   | Hypothetical protein                                | 4.46 |
| Mtr.1969.1.S1_at    | Hypothetical protein                                | 4.46 |
| Mtr.12962.1.S1_at   | Rho GDP dissociation inhibitor 2                    | 4.46 |
| Mtr.42171.1.S1_at   | Ankyrin repeat-containing protein                   | 4.46 |
| Msa.2671.1.S1_s_at  | Hypothetical protein                                | 4.45 |
| Mtr.10807.1.S1_at   | Hypothetical protein                                | 4.45 |
| Mtr.44974.1.S1_at   | Kinetechore (Skp1p-like) protein                    | 4.45 |
| Mtr.11140.1.S1_at   | Protein kinase APK1B                                | 4.45 |
| Mtr.28497.1.S1_at   | Hypothetical protein                                | 4.44 |
| Mtr.33595.1.S1_s_at | Root-specific metal transporter                     | 4.44 |
| Mtr.45783.1.S1_at   | Short-chain dehydrogenase/reductase SDR             | 4.44 |
| Mtr.33152.1.S1_at   | Hypothetical protein                                | 4.44 |
| Mtr.6341.1.S1_at    | Beta-1, 3-glucanase                                 | 4.44 |
| Mtr.49872.1.S1_at   | Hypothetical protein                                | 4.44 |
| Mtr.47863.1.S1_s_at | Transcription factor WRKY10                         | 4.43 |
| Mtr.32287.1.S1_at   | Hypothetical protein                                | 4.43 |
| Mtr.43389.1.S1_at   | Fiber protein Fb2                                   | 4.43 |
| Mtr.40523.1.S1_at   | General negative transcription regulator            | 4.43 |
| Mtr.12990.1.S1_at   | Nucleolar histone deacetylase                       | 4.43 |
| Mtr.45247.1.S1_at   | Pre-mRNA splicing factor ATP-dependent RNA helicase | 4.43 |
| Mtr.34917.1.S1_at   | Hypothetical protein                                | 4.43 |
| Mtr.7503.1.S1_at    | Hypothetical protein                                | 4.43 |
| Mtr.37469.1.S1_s_at | Hypothetical protein                                | 4.42 |
| Mtr.46176.1.S1_at   | Hypothetical protein                                | 4.42 |
| Mtr.51608.1.S1_at   | Plant lipid transfer protein                        | 4.42 |
| Mtr.2945.1.S1_at    | Ferredoxin-NADP+ reductase                          | 4.42 |
| Mtr.37730.1.S1_at   | Golgi SNARE 11 protein                              | 4.42 |
| Mtr.45351.1.S1_s_at | Hypothetical protein                                | 4.42 |
| Mtr.10176.1.S1_at   | Hypothetical protein                                | 4.41 |
| Mtr.11106.1.S1_at   | Vernalization 2 protein                             | 4.41 |
| Mtr.25964.1.S1_s_at | Hypothetical protein                                | 4.40 |
| Mtr.8464.1.S1_s_at  | Cysteine synthase                                   | 4.39 |
| Mtr.50050.1.S1_at   | Isopenicillin N synthetase                          | 4.39 |
| Mtr.23261.1.S1_at   | Hypothetical protein                                | 4.39 |
| Mtr.1536.1.S1_s_at  | Hypothetical protein                                | 4.39 |
| Mtr.40094.1.S1_at   | GH3 like protein                                    | 4.39 |
| Mtr.13394.1.S1_at   | Surfeit 1                                           | 4.39 |
| Mtr.28786.1.S1_at   | Dihydrodipicolinate synthase                        | 4.39 |
| Mtr.21708.1.S1_s_at | lysophospholipase                                   | 4.38 |
| Mtr.35538.1.S1_at   | Avr9/Cf-9 rapidly elicited protein                  | 4.38 |
| Mtr.16110.1.S1_at   | Ankyrin                                             | 4.38 |
| Mtr.41875.1.S1_at   | Receptor protein kinase                             | 4.38 |
| Mtr.7135.1.S1_at    | Low temperature-responsive RNA-binding protein      | 4.38 |

|                     |                                                     |      |
|---------------------|-----------------------------------------------------|------|
| Msa.1800.1.S1_at    | Hypothetical protein                                | 4.38 |
| Msa.1598.1.S1_at    | Hypothetical protein                                | 4.37 |
| Mtr.42229.1.S1_at   | Hypothetical protein                                | 4.37 |
| Mtr.29376.1.S1_at   | Hypothetical protein                                | 4.36 |
| Msa.1124.1.S1_at    | Hypothetical protein                                | 4.36 |
| Mtr.9542.1.S1_at    | SET-domain transcriptional regulator                | 4.36 |
| Mtr.9496.1.S1_at    | Proline rich protein                                | 4.36 |
| Mtr.43362.1.S1_at   | Serine/threonine protein phosphatase PP2A           | 4.36 |
| Msa.1032.1.S1_at    | Hypothetical protein                                | 4.35 |
| Mtr.27641.1.S1_at   | Hypothetical protein                                | 4.35 |
| Mtr.38801.1.S1_at   | TGA-type basic leucine zipper protein TGA1.1        | 4.35 |
| Mtr.45266.1.S1_at   | Phospholipase D                                     | 4.35 |
| Mtr.11338.1.S1_at   | Hypothetical protein                                | 4.35 |
| Mtr.26632.1.S1_at   | Pathogen-related protein                            | 4.34 |
| Mtr.44094.1.S1_at   | Hypothetical protein                                | 4.34 |
| Mtr.15525.1.S1_at   | Dynein light chain                                  | 4.34 |
| Mtr.13495.1.S1_at   | Epithelial keratin 2e                               | 4.34 |
| Mtr.10968.1.S1_at   | Osmotin-like protein                                | 4.34 |
| Mtr.37526.1.S1_at   | Aluminum-induced protein                            | 4.33 |
| Mtr.9327.1.S1_at    | Pre-mRNA splicing factor ATP-dependent RNA helicase | 4.33 |
| Mtr.41307.1.S1_at   | Hypothetical protein                                | 4.33 |
| Mtr.41986.1.S1_at   | Wall-associated kinase 4                            | 4.32 |
| Msa.821.1.S1_at     | Hypothetical protein                                | 4.32 |
| Mtr.40416.1.S1_at   | Hypothetical protein                                | 4.32 |
| Mtr.12229.1.S1_s_at | RING zinc finger protein                            | 4.32 |
| Mtr.43025.1.S1_at   | Histone H1                                          | 4.32 |
| Mtr.38027.1.S1_at   | Hypothetical protein                                | 4.31 |
| Mtr.21000.1.S1_at   | Universal stress protein                            | 4.31 |
| Mtr.12155.1.S1_at   | WRKY-type DNA binding protein                       | 4.31 |
| Mtr.13334.1.S1_at   | Acetoacetyl-CoA thiolase                            | 4.31 |
| Mtr.7653.1.S1_at    | Hypothetical protein                                | 4.31 |
| Msa.963.1.S1_at     | Hypothetical protein                                | 4.31 |
| Mtr.2846.1.S1_at    | Hypothetical protein                                | 4.31 |
| Mtr.9291.1.S1_s_at  | Hypothetical protein                                | 4.30 |
| Mtr.32787.1.S1_at   | ARIADNE-like protein                                | 4.30 |
| Mtr.38881.1.S1_at   | Hypothetical protein                                | 4.30 |
| Mtr.37524.1.S1_at   | Hypothetical protein                                | 4.29 |
| Mtr.47843.1.S1_at   | Monosaccharide transporter                          | 4.29 |
| Msa.2981.1.S1_at    | Hypothetical protein                                | 4.29 |
| Mtr.9182.1.S1_at    | Hypothetical protein                                | 4.29 |
| Mtr.28948.1.S1_at   | Hypothetical protein                                | 4.29 |
| Mtr.41187.1.S1_at   | bZip transcription factor                           | 4.29 |
| Mtr.38026.1.S1_at   | Hypothetical protein                                | 4.29 |
| Mtr.32914.1.S1_at   | Ethylene-induced esterase                           | 4.29 |
| Mtr.38205.1.S1_at   | GDP-Mannose transporter                             | 4.28 |
| Mtr.5684.1.S1_at    | Hypothetical protein                                | 4.28 |
| Mtr.47077.1.S1_at   | Hypothetical protein                                | 4.28 |
| Mtr.2617.1.S1_s_at  | Hypothetical protein                                | 4.28 |
| Msa.2535.1.S1_at    | Hypothetical protein                                | 4.28 |
| Mtr.32999.1.S1_at   | Hypothetical protein                                | 4.27 |
| Mtr.7519.1.S1_at    | IFA-binding protein                                 | 4.27 |
| Mtr.48842.1.S1_at   | Wound-induced protein                               | 4.27 |
| Mtr.33699.1.S1_at   | Trehalose-6-phosphate synthase                      | 4.27 |
| Mtr.9697.1.S1_at    | Hypothetical protein                                | 4.26 |



|                     |                                                     |                  |
|---------------------|-----------------------------------------------------|------------------|
| Mtr.24465.1.S1_x_at | Receptor-like protein kinase                        | 4.26             |
| Msa.1515.1.S1_at    | Hypothetical protein                                | 4.26             |
| Mtr.39883.1.S1_at   | ARIADNE-like protein ARI7                           | 4.26             |
| Msa.1479.1.S1_at    | Hypothetical protein                                | 4.25             |
| Mtr.13667.1.S1_at   | Hypothetical protein                                | 4.25             |
| Mtr.33608.1.S1_at   | Hypothetical protein                                | 4.25             |
| Mtr.43583.1.S1_at   | Hypothetical protein                                | 4.25             |
| Mtr.40099.1.S1_at   | Hypothetical protein                                | 4.25             |
| Mtr.1398.1.S1_s_at  | Hypothetical protein                                | 4.25             |
| Mtr.11911.1.S1_at   | Hypothetical protein                                | 4.25             |
| Mtr.40933.1.S1_at   | TIR-similar-domain-containing protein               | 4.25             |
| Mtr.31.1.S1_at      | Peroxidase 3                                        | 4.25             |
| Mtr.46098.1.S1_s_at | Zn-finger, DHHC type                                | 4.24             |
| Mtr.14729.1.S1_at   | RNA-processing protein                              | 4.24             |
| Mtr.13773.1.S1_at   | NADH dehydrogenase subunit 4                        | 4.24             |
| Mtr.6918.1.S1_at    | Phospholipase PLDb1                                 | 4.24             |
| Mtr.42289.1.S1_at   | Hypothetical protein                                | 4.24             |
| Mtr.12490.1.S1_at   | Hypothetical protein                                | 4.24             |
| Mtr.31741.1.S1_at   | WD repeat domain                                    | 4.24             |
| Mtr.35611.1.S1_at   | Hypothetical protein                                | 4.24             |
| Mtr.43612.1.S1_at   | WRKY transcription factor 65                        | 4.24             |
| Mtr.40144.1.S1_at   | Glutamate-rich protein                              | 4.24             |
| Mtr.11878.1.S1_at   | Receptor protein kinase                             | 4.23             |
| Mtr.32533.1.S1_s_at | Hypothetical protein                                | 4.23             |
| Mtr.40021.1.S1_at   | Germin-like protein                                 | 4.23             |
| Mtr.40178.1.S1_at   | Hypothetical protein                                | 4.23             |
| Mtr.43355.1.S1_at   | Hypothetical protein                                | 4.22             |
| Mtr.7268.1.S1_at    | Hypothetical protein                                | 4.22             |
| Mtr.43483.1.S1_at   | Hypothetical protein                                | 4.22             |
| Mtr.16414.1.S1_s_at | Ubiquitin system component Cue                      | 4.22             |
| Mtr.27346.1.S1_at   | Hypothetical protein                                | 4.22             |
| Mtr.17962.1.S1_at   | DNA-binding WRKY                                    | 4.22             |
| Mtr.38070.1.S1_at   | Hypothetical protein                                | 4.22             |
| Mtr.47086.1.S1_at   | Glucan 1,3-beta-glucosidase                         | 4.22             |
| Mtr.13392.1.S1_at   | Protein kinase                                      | 4.22             |
| Mtr.900.1.S1_at     | PPR repeat-containing protein                       | 4.21             |
| Mtr.41029.1.S1_at   | Ankyrin repeat-containing protein                   | 4.21             |
| Mtr.17691.1.S1_at   | Transcriptional factor                              | 4.21             |
| Mtr.12449.1.S1_at   | Hypothetical protein                                | 4.21             |
| Mtr.9139.1.S1_at    | Hypothetical protein                                | 4.21             |
| Mtr.38655.1.S1_at   | Hypothetical protein                                | 4.20             |
| Mtr.51932.1.S1_at   | Quinonprotein alcohol dehydrogenase                 | 4.20             |
| Msa.1174.1.S1_at    | Hypothetical protein                                | 4.20             |
| Mtr.6343.1.S1_at    | Hydroxyproline-rich glycoprotein                    | 4.20             |
| Mtr.34454.1.S1_at   | Hypothetical protein                                | 4.19             |
| Mtr.32738.1.S1_at   | Myo-inositol oxygenase                              | 4.19             |
| Mtr.45883.1.S1_at   | Hypothetical protein                                | 4.19             |
| Mtr.44614.1.S1_at   | Auxilin-like protein                                | 4.19             |
| Mtr.50730.1.S1_at   | bZIP transcription factor                           | 4.18             |
| Mtr.2533.1.S1_at    | Hypothetical protein                                | 4.18             |
| Mtr.12497.1.S1_at   | Protein kinase                                      | 4.18             |
| Msa.1370.1.S1_at    | Hypothetical protein                                | 4.18             |
| Mtr.15199.1.S1_at   | Hypothetical protein                                | 4.17             |
| Mtr.34874.1.S1_s_at | Dolichyl-phosphate beta-glucosyltransferase homolog | At2g39630 - 4.17 |

|                     |                                              |      |
|---------------------|----------------------------------------------|------|
| Mtr.37684.1.S1_at   | Actin-depolymerizing factor 5                | 4.17 |
| Mtr.38752.1.S1_at   | Geranyl diphosphate synthase small subunit   | 4.17 |
| Mtr.18069.1.S1_x_at | Disease resistance protein                   | 4.17 |
| Mtr.12229.1.S1_at   | RING zinc finger protein                     | 4.16 |
| Mtr.40631.1.S1_at   | Protein kinase                               | 4.16 |
| Mtr.5750.1.S1_at    | EREBP-3-like protein                         | 4.16 |
| Mtr.40315.1.S1_at   | Al-induced protein                           | 4.16 |
| Mtr.39023.1.S1_at   | Hypothetical protein                         | 4.16 |
| Mtr.32808.1.S1_at   | Hypothetical protein                         | 4.16 |
| Mtr.29855.1.S1_at   | Hypothetical protein                         | 4.15 |
| Mtr.42598.1.S1_at   | Hypothetical protein                         | 4.15 |
| Mtr.5723.1.S1_at    | Hypothetical protein                         | 4.15 |
| Mtr.52078.1.S1_s_at | Hypothetical protein                         | 4.15 |
| Mtr.39031.1.S1_at   | Hypothetical protein                         | 4.15 |
| Mtr.7637.1.S1_at    | Prostatic spermine-binding protein           | 4.15 |
| Mtr.9362.1.S1_at    | Hypothetical protein                         | 4.14 |
| Mtr.41578.1.S1_at   | Hypothetical protein                         | 4.14 |
| Mtr.5079.1.S1_at    | Syringolide-induced protein 1-3-1B           | 4.14 |
| Mtr.12878.1.S1_at   | Nucleoid DNA-binding-like protein            | 4.14 |
| Mtr.39540.1.S1_at   | AttA2-like ABC transporter                   | 4.13 |
| Mtr.41752.1.S1_at   | Geraniol 10-hydroxylase                      | 4.13 |
| Mtr.47433.1.S1_at   | Hypothetical protein                         | 4.13 |
| Mtr.41733.1.S1_at   | Hypothetical protein                         | 4.13 |
| Mtr.23052.1.S1_at   | AAA-type ATPase                              | 4.13 |
| Mtr.52169.1.S1_at   | Hypothetical protein                         | 4.13 |
| Mtr.4342.1.S1_at    | Hypothetical protein                         | 4.12 |
| Mtr.43909.1.S1_at   | RNA-binding region RNP-1                     | 4.12 |
| Mtr.11114.1.S1_at   | Hypothetical protein                         | 4.12 |
| Mtr.12146.1.S1_at   | Hypothetical protein                         | 4.12 |
| Mtr.45293.1.S1_s_at | Hypothetical protein                         | 4.12 |
| Mtr.27620.1.S1_at   | Hypothetical protein                         | 4.12 |
| Mtr.4829.1.S1_s_at  | Lipoate protein ligase                       | 4.12 |
| Mtr.34899.1.S1_at   | Hexose carrier protein                       | 4.12 |
| Mtr.40696.1.S1_at   | Hypothetical protein                         | 4.11 |
| Mtr.39259.1.S1_at   | Hypothetical protein                         | 4.11 |
| Mtr.45285.1.S1_at   | Hypothetical protein                         | 4.11 |
| Msa.2736.1.S1_at    | Hypothetical protein                         | 4.11 |
| Mtr.15856.1.S1_x_at | RNA-binding region RNP-1                     | 4.10 |
| Mtr.13660.1.S1_at   | ERD3 protein                                 | 4.09 |
| Mtr.40876.1.S1_at   | Hypothetical protein                         | 4.09 |
| Mtr.44123.1.S1_at   | Lipase class 3                               | 4.09 |
| Mtr.42359.1.S1_at   | Hypothetical protein                         | 4.09 |
| Mtr.9135.1.S1_at    | Homeobox-leucine zipper protein              | 4.09 |
| Mtr.11991.1.S1_at   | Strubbelig receptor family                   | 4.09 |
| Mtr.28237.1.S1_s_at | Agenet domain-containing protein             | 4.09 |
| Mtr.1874.1.S1_s_at  | Potential phospholipid-transporting ATPase 9 | 4.08 |
| Msa.2660.1.S1_at    | Hypothetical protein                         | 4.08 |
| Mtr.43097.1.S1_at   | Beta-amylase                                 | 4.08 |
| Mtr.9188.1.S1_at    | Hypothetical protein                         | 4.08 |
| Mtr.45020.1.S1_at   | Beta-glucosidase-like protein                | 4.08 |
| Mtr.5663.1.S1_at    | Beta-galactosidase                           | 4.08 |
| Mtr.13156.1.S1_at   | Hypothetical protein                         | 4.08 |
| Mtr.51565.1.S1_s_at | Galactose-binding protein                    | 4.07 |
| Mtr.7084.1.S1_at    | Asparagine synthase                          | 4.07 |

|                     |                                                          |      |
|---------------------|----------------------------------------------------------|------|
| Mtr.32367.1.S1_s_at | Peroxidase 3                                             | 4.07 |
| Mtr.38484.1.S1_at   | Yippee-like protein                                      | 4.07 |
| Mtr.23415.1.S1_at   | Hypothetical protein                                     | 4.07 |
| Mtr.20173.1.S1_at   | Nucleoporin interacting component                        | 4.07 |
| Mtr.5913.1.S1_at    | LIM domain containing protein                            | 4.07 |
| Mtr.51323.1.S1_s_at | Hypothetical protein                                     | 4.07 |
| Mtr.11749.1.S1_at   | Hypothetical protein                                     | 4.06 |
| Mtr.44780.1.S1_at   | Hypothetical protein                                     | 4.06 |
| Mtr.38256.1.S1_s_at | Flavonol synthase                                        | 4.06 |
| Mtr.11497.1.S1_at   | Hypothetical protein                                     | 4.06 |
| Mtr.12826.1.S1_s_at | Hypothetical protein                                     | 4.06 |
| Mtr.8633.1.S1_at    | Hypothetical protein                                     | 4.05 |
| Mtr.30513.1.S1_s_at | Hypothetical protein                                     | 4.05 |
| Mtr.12034.1.S1_at   | ADP/ATP translocase-like protein                         | 4.05 |
| Mtr.22270.1.S1_s_at | Hypothetical protein                                     | 4.05 |
| Mtr.12402.1.S1_s_at | Beta-galactosidase                                       | 4.05 |
| Mtr.7638.1.S1_s_at  | Endo-1,3-beta-glucanase                                  | 4.05 |
| Mtr.39602.1.S1_at   | Receptor protein kinase                                  | 4.05 |
| Mtr.39985.1.S1_at   | Hypothetical protein                                     | 4.05 |
| Mtr.1757.1.S1_at    | Homeodomain-leucine zipper protein                       | 4.05 |
| Mtr.18366.1.S1_at   | Curculin-like (mannose-binding) lectin                   | 4.04 |
| Mtr.37522.1.S1_at   | Ribosomal protein L7                                     | 4.04 |
| Mtr.31337.1.S1_at   | Serine/threonine protein kinase                          | 4.03 |
| Mtr.24777.1.S1_s_at | Hypothetical protein                                     | 4.03 |
| Mtr.35926.1.S1_s_at | Hypothetical protein                                     | 4.03 |
| Mtr.9613.1.S1_at    | TIR-similar-domain-containing protein                    | 4.03 |
| Mtr.7416.1.S1_at    | Hypothetical protein                                     | 4.03 |
| Mtr.40735.1.S1_at   | Hypothetical protein                                     | 4.03 |
| Mtr.26549.1.S1_at   | Cathepsin B-like cysteine protease                       | 4.03 |
| Mtr.5184.1.S1_at    | Pre-mRNA splicing factor ATP-dependent RNA helicase      | 4.02 |
| Mtr.7760.1.S1_at    | Cdc24                                                    | 4.02 |
| Mtr.42696.1.S1_at   | Nam-like protein 8                                       | 4.02 |
| Mtr.6191.1.S1_at    | Hypothetical protein                                     | 4.02 |
| Mtr.19399.1.S1_at   | Glutathione S-transferase                                | 4.02 |
| Mtr.13083.1.S1_at   | Hypothetical protein                                     | 4.02 |
| Mtr.40830.1.S1_at   | 2-hydroxyphytanoyl-CoA lyase                             | 4.02 |
| Mtr.43073.1.S1_s_at | Poly(A)-binding protein C-terminal interacting protein 6 | 4.01 |
| Mtr.48130.1.S1_at   | Hypothetical protein                                     | 4.01 |
| Mtr.41634.1.S1_at   | Receptor kinase-like protein                             | 4.01 |
| Mtr.6671.1.S1_at    | Hypothetical protein                                     | 4.01 |
| Mtr.29273.1.S1_at   | Hypothetical protein                                     | 4.00 |
| Mtr.50416.1.S1_at   | Phosphatidylinositol 3- and 4-kinase                     | 4.00 |
| Mtr.8319.1.S1_at    | Class III peroxidase 5                                   | 4.00 |
| Mtr.12120.1.S1_at   | Hypothetical protein                                     | 4.00 |
| Mtr.32104.1.S1_s_at | Respiratory burst oxidase homolog                        | 4.00 |
| Mtr.41920.1.S1_at   | Hypothetical protein                                     | 4.00 |
| Msa.1168.1.S1_at    | Hypothetical protein                                     | 3.99 |
| Mtr.16733.1.S1_s_at | Protein kinase                                           | 3.99 |
| Mtr.44989.1.S1_at   | Nucleosome assembly protein 1-like protein 2             | 3.99 |
| Mtr.45902.1.S1_at   | Hypothetical protein                                     | 3.99 |
| Mtr.42911.1.S1_at   | RING zinc finger protein                                 | 3.99 |
| Mtr.39307.1.S1_at   | Hypothetical protein                                     | 3.99 |
| Mtr.34450.1.S1_at   | Hypothetical protein                                     | 3.99 |
| Mtr.51636.1.S1_at   | Hypothetical protein                                     | 3.99 |

|                     |                                                  |      |
|---------------------|--------------------------------------------------|------|
| Mtr.39665.1.S1_at   | Hypothetical protein                             | 3.99 |
| Mtr.37685.1.S1_at   | Actin-depolymerizing factor 5                    | 3.99 |
| Mtr.13525.1.S1_at   | Hypothetical protein                             | 3.99 |
| Mtr.43170.1.S1_at   | Glutamate dehydrogenase 1                        | 3.99 |
| Mtr.31335.1.S1_s_at | Alcohol dehydrogenase                            | 3.99 |
| Mtr.40805.1.S1_at   | Hypothetical protein                             | 3.98 |
| Mtr.12948.1.S1_at   | Dehydration responsive element binding protein   | 3.98 |
| Mtr.45225.1.S1_at   | Ankyrin-like protein                             | 3.98 |
| Mtr.9826.1.S1_at    | Hypothetical protein                             | 3.98 |
| Mtr.50554.1.S1_at   | Hypothetical protein                             | 3.98 |
| Mtr.50859.1.S1_s_at | Hypothetical protein                             | 3.98 |
| Mtr.40114.1.S1_s_at | Soluble inorganic pyrophosphatase                | 3.98 |
| Mtr.10781.1.S1_at   | Nuclease                                         | 3.98 |
| Mtr.32930.1.S1_at   | Plasma membrane ATPase 3                         | 3.98 |
| Mtr.38139.1.S1_s_at | Zinc finger protein                              | 3.98 |
| Mtr.45315.1.S1_at   | SPF1 protein                                     | 3.98 |
| Mtr.37972.1.S1_at   | Hypothetical protein                             | 3.97 |
| Mtr.47631.1.S1_s_at | Transposase                                      | 3.97 |
| Mtr.37260.1.S1_at   | Agenet domain-containing protein                 | 3.97 |
| Mtr.38221.1.S1_at   | Hypothetical protein                             | 3.97 |
| Mtr.413.1.S1_at     | CLAVATA1 receptor kinase (CLV1)-like protein     | 3.97 |
| Mtr.51664.1.S1_s_at | Natural resistance-associated macrophage protein | 3.97 |
| Mtr.32717.1.S1_at   | Hypothetical protein                             | 3.97 |
| Mtr.205.1.S1_at     | 40S ribosomal protein S12                        | 3.96 |
| Mtr.38928.1.S1_at   | Choline transporter                              | 3.96 |
| Mtr.49053.1.S1_at   | Esterase/lipase/thioesterase                     | 3.96 |
| Mtr.39999.1.S1_at   | Syringolide-induced protein B13-1-9              | 3.96 |
| Mtr.44627.1.S1_at   | Hypothetical protein                             | 3.96 |
| Mtr.32566.1.S1_x_at | DEAD box protein                                 | 3.96 |
| Mtr.3600.1.S1_at    | Two-component response regulator ARR2            | 3.96 |
| Mtr.10806.1.S1_at   | Hypothetical protein                             | 3.96 |
| Mtr.12240.1.S1_at   | Envelope glycoprotein                            | 3.96 |
| Mtr.38171.1.S1_at   | Monooxygenase 2                                  | 3.95 |
| Mtr.51425.1.S1_at   | Protein kinase                                   | 3.95 |
| Mtr.41380.1.S1_at   | Hypothetical protein                             | 3.95 |
| Mtr.1871.1.S1_at    | Hypothetical protein                             | 3.95 |
| Mtr.32666.1.S1_at   | Hypothetical protein                             | 3.95 |
| Mtr.44219.1.S1_at   | Cytokinin oxidase-like protein                   | 3.95 |
| Mtr.10956.1.S1_at   | Hypothetical protein                             | 3.95 |
| Mtr.39788.1.S1_at   | P12 I protein                                    | 3.95 |
| Mtr.44772.1.S1_at   | Elongation factor G                              | 3.94 |
| Mtr.11377.1.S1_at   | Glutathione S-transferase GST 7                  | 3.94 |
| Mtr.26949.1.S1_at   | Hypothetical protein                             | 3.94 |
| Mtr.8990.1.S1_at    | Hypothetical protein                             | 3.93 |
| Mtr.39643.1.S1_at   | Hypothetical protein                             | 3.93 |
| Mtr.32783.1.S1_at   | Myosin                                           | 3.93 |
| Mtr.33585.1.S1_at   | Hypothetical protein                             | 3.93 |
| Mtr.12961.1.S1_at   | Hypothetical protein                             | 3.93 |
| Mtr.2249.1.S1_at    | Hypothetical protein                             | 3.93 |
| Mtr.13237.1.S1_at   | Protein integral membrane protein                | 3.93 |
| Mtr.43732.1.S1_at   | Hypothetical protein                             | 3.92 |
| Mtr.2720.1.S1_at    | Gyrase A                                         | 3.92 |
| Mtr.6315.1.S1_at    | GCN4-complementing protein                       | 3.92 |
| Mtr.30749.1.S1_s_at | Hypothetical protein                             | 3.92 |

|                     |                                              |      |
|---------------------|----------------------------------------------|------|
| Mtr.50704.1.S1_at   | Aldehyde dehydrogenase                       | 3.92 |
| Mtr.44157.1.S1_at   | C3HC4-type RING zinc finger protein          | 3.92 |
| Mtr.33563.1.S1_at   | Hypothetical protein                         | 3.91 |
| Mtr.27324.1.S1_s_at | Xyloglucan endo-1,4-beta-D-glucanase         | 3.91 |
| Mtr.30728.1.S1_at   | SAR DNA-binding protein                      | 3.91 |
| Mtr.44885.1.S1_at   | Hypothetical protein                         | 3.91 |
| Mtr.4569.1.S1_at    | Hypothetical protein                         | 3.90 |
| Mtr.37468.1.S1_at   | Hypothetical protein                         | 3.90 |
| Mtr.40166.1.S1_s_at | Phenylalanine ammonia-lyase                  | 3.90 |
| Mtr.33274.1.S1_at   | Hypothetical protein                         | 3.90 |
| Mtr.42007.1.S1_at   | Hypothetical protein                         | 3.90 |
| Mtr.29833.1.S1_s_at | Hypothetical protein                         | 3.90 |
| Mtr.27130.1.S1_s_at | Hypothetical protein                         | 3.90 |
| Mtr.38461.1.S1_at   | Calmodulin-like domain protein kinase        | 3.90 |
| Mtr.9348.1.S1_s_at  | Ubiquitin-protein ligase                     | 3.89 |
| Mtr.41339.1.S1_at   | Hypothetical protein                         | 3.89 |
| Mtr.26514.1.S1_s_at | F-box protein                                | 3.89 |
| Mtr.42649.1.S1_at   | Hypothetical protein                         | 3.89 |
| Mtr.37153.1.S1_at   | Light repressible receptor protein kinase    | 3.89 |
| Mtr.5061.1.S1_at    | ABC transporter-like protein                 | 3.89 |
| Mtr.16955.1.S1_at   | Ribosomal protein S9                         | 3.89 |
| Mtr.27222.1.S1_at   | Hypothetical protein                         | 3.89 |
| Mtr.27738.1.S1_at   | ATP-dependent molecular chaperone HSP82      | 3.88 |
| Mtr.1874.1.S1_at    | Potential phospholipid-transporting ATPase 9 | 3.88 |
| Msa.1037.1.S1_at    | Hypothetical protein                         | 3.88 |
| Mtr.8934.1.S1_at    | Alternative oxidase 3                        | 3.88 |
| Mtr.31852.1.S1_s_at | GATA-binding transcription factor            | 3.88 |
| Mtr.39487.1.S1_s_at | Lipoxygenase                                 | 3.88 |
| Mtr.33544.1.S1_at   | Beta-galactosidase                           | 3.88 |
| Mtr.39950.1.S1_at   | Hypothetical protein                         | 3.88 |
| Mtr.40801.1.S1_at   | Hypothetical protein                         | 3.88 |
| Mtr.7429.1.S1_s_at  | Hypothetical protein                         | 3.88 |
| Mtr.34946.1.S1_at   | Hypothetical protein                         | 3.87 |
| Mtr.9141.1.S1_at    | Hypothetical protein                         | 3.87 |
| Mtr.4233.1.S1_at    | Hypothetical protein                         | 3.87 |
| Mtr.24351.1.S1_s_at | Hypothetical protein                         | 3.87 |
| Mtr.14442.1.S1_at   | Hypothetical protein                         | 3.87 |
| Mtr.44992.1.S1_s_at | Serine/threonine protein kinase              | 3.87 |
| Mtr.37020.1.S1_at   | NADH-ubiquinone oxidoreductase subunit 8     | 3.86 |
| Mtr.43657.1.S1_at   | Hypothetical protein                         | 3.86 |
| Mtr.29988.1.S1_at   | ABC transporter                              | 3.86 |
| Mtr.8468.1.S1_at    | Cysteine synthase                            | 3.86 |
| Mtr.38837.1.S1_s_at | Hypothetical protein                         | 3.86 |
| Mtr.38935.1.S1_at   | Myo-inositol transporter 1                   | 3.86 |
| Mtr.13559.1.S1_s_at | LOB domain protein 38                        | 3.86 |
| Mtr.2124.1.S1_s_at  | Hypothetical protein                         | 3.85 |
| Mtr.20985.1.S1_at   | acyl-CoA oxidase                             | 3.85 |
| Mtr.32298.1.S1_at   | QbsK                                         | 3.85 |
| Mtr.24374.1.S1_at   | Fiber protein Fb2                            | 3.85 |
| Msa.3087.1.S1_at    | Hypothetical protein                         | 3.85 |
| Mtr.12430.1.S1_s_at | Mature anther-specific protein               | 3.85 |
| Mtr.43353.1.S1_at   | Hypothetical protein                         | 3.85 |
| Mtr.12636.1.S1_at   | Fructokinase                                 | 3.85 |
| Mtr.46843.1.S1_at   | F-box protein                                | 3.84 |

|                     |                                                      |      |
|---------------------|------------------------------------------------------|------|
| Mtr.25309.1.S1_at   | Hypothetical protein                                 | 3.84 |
| Mtr.5571.1.S1_s_at  | Hypothetical protein                                 | 3.84 |
| Mtr.2503.1.S1_s_at  | NEP1-interacting protein                             | 3.84 |
| Mtr.41096.1.S1_at   | Tubby-like protein                                   | 3.84 |
| Mtr.44922.1.S1_at   | Glycine-rich protein 2                               | 3.84 |
| Mtr.14517.1.S1_at   | RNA-binding region RNP-1                             | 3.84 |
| Mtr.44365.1.S1_s_at | Adenine-specific DNA modification methyltransferase  | 3.84 |
| Mtr.10588.1.S1_at   | Hypothetical protein                                 | 3.84 |
| Mtr.42452.1.S1_at   | Hypothetical protein                                 | 3.84 |
| Mtr.7575.1.S1_at    | Hypothetical protein                                 | 3.84 |
| Mtr.12168.1.S1_at   | Diamine oxidase (Copper amino oxidase)               | 3.83 |
| Mtr.4050.1.S1_at    | Hypothetical protein                                 | 3.83 |
| Mtr.52112.1.S1_s_at | RNA-binding region RNP-1                             | 3.83 |
| Mtr.39422.1.S1_s_at | Hypothetical protein                                 | 3.83 |
| Mtr.18340.1.S1_at   | Hypothetical protein                                 | 3.83 |
| Mtr.31877.1.S1_at   | P-glycoprotein                                       | 3.83 |
| Mtr.10621.1.S1_at   | Hypothetical protein                                 | 3.82 |
| Msa.1041.1.S1_at    | Hypothetical protein                                 | 3.82 |
| Mtr.13453.1.S1_at   | Hypothetical protein                                 | 3.82 |
| Mtr.37222.1.S1_at   | Hypothetical protein                                 | 3.82 |
| Mtr.35818.1.S1_at   | Hypothetical protein                                 | 3.82 |
| Mtr.8994.1.S1_s_at  | Hypothetical protein                                 | 3.82 |
| Mtr.11606.1.S1_at   | Hypothetical protein                                 | 3.81 |
| Mtr.41411.1.S1_at   | Hypothetical protein                                 | 3.81 |
| Mtr.9913.1.S1_at    | Hypothetical protein                                 | 3.81 |
| Mtr.11493.1.S1_at   | Hypothetical protein                                 | 3.81 |
| Mtr.40100.1.S1_at   | Soluble inorganic pyrophosphatase                    | 3.81 |
| Mtr.41152.1.S1_at   | Hypothetical protein                                 | 3.80 |
| Mtr.11252.1.S1_s_at | Receptor kinase-like protein                         | 3.80 |
| Mtr.27102.1.S1_at   | Hypothetical protein                                 | 3.80 |
| Mtr.22662.1.S1_at   | NADP-dependent malic enzyme                          | 3.80 |
| Mtr.9290.1.S1_at    | Hypothetical protein                                 | 3.80 |
| Mtr.13010.1.S1_at   | Xyloglucan endotransglucosylase/hydrolase protein 22 | 3.80 |
| Mtr.13696.1.S1_at   | Hypothetical protein                                 | 3.79 |
| Mtr.9028.1.S1_at    | Hypothetical protein                                 | 3.79 |
| Mtr.9177.1.S1_at    | Hypothetical protein                                 | 3.79 |
| Mtr.3871.1.S1_at    | CCAAT-box-binding transcription factor               | 3.79 |
| Mtr.9272.1.S1_at    | Hypothetical protein                                 | 3.79 |
| Mtr.8592.1.S1_at    | Hypothetical protein                                 | 3.79 |
| Mtr.38966.1.S1_at   | Ser/Thr protein kinase                               | 3.79 |
| Mtr.39812.1.S1_s_at | Respiratory burst oxidase homolog                    | 3.79 |
| Mtr.33788.1.S1_at   | Hypothetical protein                                 | 3.78 |
| Mtr.39578.1.S1_at   | A-agglutinin attachment subunit precursor            | 3.78 |
| Mtr.42029.1.S1_s_at | Metallo-beta-lactamase                               | 3.78 |
| Mtr.38970.1.S1_at   | Hypothetical protein                                 | 3.78 |
| Mtr.10037.1.S1_at   | GDSL-motif lipase/hydrolase-like protein             | 3.78 |
| Mtr.22904.1.S1_s_at | Aux/IAA protein                                      | 3.78 |
| Mtr.34203.1.S1_at   | UDP-glucuronosyltransferase                          | 3.77 |
| Mtr.43237.1.S1_at   | TFIIIE-beta 2                                        | 3.77 |
| Mtr.37374.1.S1_at   | Patatin-like protein                                 | 3.77 |
| Mtr.44688.1.S1_at   | Hypothetical protein                                 | 3.77 |
| Mtr.52010.1.S1_at   | Myb, DNA-binding                                     | 3.77 |
| Mtr.51695.1.S1_at   | Hypothetical protein                                 | 3.77 |
| Mtr.13329.1.S1_at   | Hypothetical protein                                 | 3.77 |

|                     |                                                           |      |
|---------------------|-----------------------------------------------------------|------|
| Mtr.33699.1.S1_x_at | Trehalose-7-phosphate synthase                            | 3.77 |
| Mtr.45244.1.S1_at   | Hypothetical protein                                      | 3.77 |
| Msa.2711.1.S1_at    | Hypothetical protein                                      | 3.77 |
| Mtr.46485.1.S1_at   | Glutathione S-transferase GST 17                          | 3.77 |
| Mtr.11018.1.S1_s_at | Hypothetical protein                                      | 3.76 |
| Mtr.17513.1.S1_s_at | bZIP transcription factor                                 | 3.76 |
| Mtr.50280.1.S1_at   | Protein kinase                                            | 3.76 |
| Mtr.41853.1.S1_at   | Zinc finger, C3HC4 type (RING finger)                     | 3.76 |
| Mtr.37655.1.S1_at   | Nucleolar histone deacetylase                             | 3.76 |
| Msa.1013.1.S1_at    | Hypothetical protein                                      | 3.75 |
| Mtr.3073.1.S1_s_at  | Type IIA calcium ATPase                                   | 3.75 |
| Mtr.13695.1.S1_at   | Hypothetical protein                                      | 3.75 |
| Mtr.11240.1.S1_at   | DR2R protein                                              | 3.75 |
| Mtr.43466.1.S1_at   | Ethylene receptor                                         | 3.75 |
| Mtr.50858.1.S1_s_at | Hypothetical protein                                      | 3.74 |
| Mtr.10672.1.S1_s_at | Polyphosphoinositide binding protein                      | 3.74 |
| Mtr.31538.1.S1_at   | Nam-like protein                                          | 3.74 |
| Mtr.2864.1.S1_at    | Hypothetical protein                                      | 3.74 |
| Mtr.18298.1.S1_at   | Serine/threonine protein kinase                           | 3.74 |
| Mtr.21266.1.S1_at   | Hypothetical protein                                      | 3.74 |
| Mtr.2158.1.S1_at    | Hypothetical protein                                      | 3.74 |
| Mtr.32889.1.S1_at   | Hypothetical protein                                      | 3.74 |
| Mtr.37560.1.S1_at   | Pyruvate decarboxylase                                    | 3.74 |
| Mtr.44718.1.S1_at   | Hypothetical protein                                      | 3.73 |
| Msa.884.1.S1_at     | Hypothetical protein                                      | 3.73 |
| Mtr.6540.1.S1_at    | Lipoxygenase                                              | 3.73 |
| Mtr.24211.1.S1_at   | Hypothetical protein                                      | 3.73 |
| Mtr.42547.1.S1_s_at | Respiratory burst oxidase homolog                         | 3.72 |
| Mtr.2617.1.S1_at    | Hypothetical protein                                      | 3.72 |
| Mtr.10529.1.S1_at   | ARF GAP-like zinc finger-containing protein               | 3.72 |
| Mtr.8642.1.S1_at    | Serine palmitoyltransferase                               | 3.72 |
| Mtr.41656.1.S1_at   | Hypothetical protein                                      | 3.72 |
| Mtr.38654.1.S1_at   | Hypothetical protein                                      | 3.72 |
| Mtr.27949.1.S1_at   | Internalin-related protein                                | 3.72 |
| Mtr.17721.1.S1_s_at | Esterase/lipase/thioesterase                              | 3.72 |
| Mtr.46896.1.S1_s_at | Calcium-dependent protein kinase CPK1 adapter protein 2   | 3.72 |
| Mtr.29231.1.S1_at   | Alpha-expansin                                            | 3.72 |
| Mtr.43169.1.S1_at   | Hypothetical protein                                      | 3.72 |
| Mtr.40685.1.S1_at   | Hypothetical protein                                      | 3.72 |
| Mtr.43116.1.S1_at   | RAV2 protein                                              | 3.72 |
| Mtr.17714.1.S1_at   | Protein prenyltransferase                                 | 3.72 |
| Mtr.12238.1.S1_at   | Nam-like protein                                          | 3.71 |
| Mtr.2238.1.S1_s_at  | Repetitive proline-rich cell wall protein                 | 3.71 |
| Mtr.50954.1.S1_s_at | Hypothetical protein                                      | 3.71 |
| Mtr.52341.1.S1_at   | Cyclin-like F-box protein                                 | 3.71 |
| Mtr.41245.1.S1_at   | Chorismate mutase CM2                                     | 3.71 |
| Mtr.44335.1.S1_at   | Glucosidase SCW10                                         | 3.71 |
| Mtr.13183.1.S1_at   | Hypothetical protein                                      | 3.71 |
| Mtr.45199.1.S1_at   | Hypothetical protein                                      | 3.71 |
| Mtr.11232.1.S1_at   | Serine/threonine specific protein kinase                  | 3.70 |
| Mtr.41051.1.S1_at   | Hypothetical protein                                      | 3.70 |
| Mtr.20124.1.S1_at   | Serine/threonine protein kinase                           | 3.70 |
| Mtr.13005.1.S1_at   | Phytochrome A specific signal transduction component PAT3 | 3.70 |
| Mtr.8632.1.S1_s_at  | Hypothetical protein                                      | 3.70 |

|                     |                                              |      |
|---------------------|----------------------------------------------|------|
| Mtr.13155.1.S1_at   | Hypothetical protein                         | 3.69 |
| Mtr.19727.1.S1_at   | Hypothetical protein                         | 3.69 |
| Mtr.9074.1.S1_at    | Hypothetical protein                         | 3.69 |
| Mtr.41494.1.S1_at   | Hypothetical protein                         | 3.69 |
| Mtr.43604.1.S1_s_at | Hypothetical protein                         | 3.69 |
| Mtr.12004.1.S1_at   | Hypothetical protein                         | 3.69 |
| Mtr.41349.1.S1_s_at | Hydrolase, alpha/beta fold family protein    | 3.69 |
| Mtr.3000.1.S1_s_at  | DEAD-Box RNA helicase                        | 3.69 |
| Mtr.42544.1.S1_at   | Nodulin-like protein                         | 3.69 |
| Mtr.45383.1.S1_at   | Hypothetical protein                         | 3.69 |
| Mtr.43493.1.S1_at   | Hypothetical protein                         | 3.68 |
| Mtr.34629.1.S1_at   | Protein transport protein                    | 3.68 |
| Mtr.34149.1.S1_at   | Hypothetical protein                         | 3.68 |
| Mtr.43487.1.S1_at   | Hypothetical protein                         | 3.68 |
| Mtr.24373.1.S1_at   | Fiber protein Fb2                            | 3.68 |
| Mtr.14781.1.S1_at   | Hypothetical protein                         | 3.68 |
| Mtr.13058.1.S1_at   | Hypothetical protein                         | 3.68 |
| Mtr.14663.1.S1_at   | Major intrinsic protein                      | 3.67 |
| Mtr.9680.1.S1_at    | Zinc finger protein                          | 3.67 |
| Mtr.50378.1.S1_s_at | AAA ATPas                                    | 3.67 |
| Mtr.8479.1.S1_at    | Cytochrome P450                              | 3.67 |
| Mtr.51785.1.S1_at   | Hypothetical protein                         | 3.67 |
| Mtr.9478.1.S1_at    | Laccase-like protein                         | 3.66 |
| Mtr.37418.1.S1_s_at | NuM1 protein                                 | 3.66 |
| Mtr.9348.1.S1_at    | Ubiquitin-protein ligase                     | 3.66 |
| Mtr.27778.1.S1_at   | Serine/threonine protein kinase              | 3.66 |
| Mtr.13338.1.S1_at   | Hypothetical protein                         | 3.66 |
| Mtr.33754.1.S1_at   | Hypothetical protein                         | 3.66 |
| Mtr.6498.1.S1_at    | Hypothetical protein                         | 3.66 |
| Mtr.33907.1.S1_at   | Hypothetical protein                         | 3.66 |
| Mtr.28680.1.S1_at   | Hypothetical protein                         | 3.65 |
| Mtr.20079.1.S1_at   | Lipoxygenase                                 | 3.65 |
| Mtr.9043.1.S1_at    | LS1-like protein                             | 3.65 |
| Mtr.36255.1.S1_at   | Aquaporin-like transmembrane channel protein | 3.65 |
| Mtr.39204.1.S1_at   | Hypothetical protein                         | 3.65 |
| Mtr.10636.1.S1_at   | MYB protein                                  | 3.65 |
| Mtr.12226.1.S1_at   | Hypothetical protein                         | 3.65 |
| Mtr.12750.1.S1_at   | Hypothetical protein                         | 3.65 |
| Mtr.2386.1.S1_at    | Hypothetical protein                         | 3.65 |
| Mtr.19793.1.S1_at   | Hypothetical protein                         | 3.65 |
| Mtr.6526.1.S1_at    | Hypothetical protein                         | 3.65 |
| Mtr.39287.1.S1_at   | SGP1 monomeric G-protein                     | 3.65 |
| Mtr.23284.1.S1_at   | Calcium-binding EF-hand family protein       | 3.64 |
| Msa.1303.1.S1_at    | Hypothetical protein                         | 3.64 |
| Mtr.13714.1.S1_at   | Auxin-induced protein 22D                    | 3.64 |
| Mtr.791.1.S1_at     | Acyl-activating enzyme 18                    | 3.64 |
| Mtr.31446.1.S1_at   | Hypothetical protein                         | 3.64 |
| Mtr.47761.1.S1_at   | Hypothetical protein                         | 3.64 |
| Mtr.6934.1.S1_at    | Glutaredoxin-related-like protein            | 3.63 |
| Mtr.37300.1.S1_at   | Cytochrome P450                              | 3.63 |
| Mtr.48357.1.S1_at   | Trypsin protein inhibitor 2                  | 3.63 |
| Mtr.7578.1.S1_at    | Hypothetical protein                         | 3.63 |
| Mtr.2889.1.S1_at    | Hypothetical protein                         | 3.63 |
| Mtr.24715.1.S1_at   | Glutathione S-transferase GST 14             | 3.63 |



|                     |                                                    |      |
|---------------------|----------------------------------------------------|------|
| Mtr.38725.1.S1_s_at | CDPK adapter protein 1                             | 3.63 |
| Mtr.11290.1.S1_at   | Hypothetical protein                               | 3.62 |
| Mtr.34834.1.S1_at   | Serine/threonine protein kinase                    | 3.62 |
| Mtr.24319.1.S1_at   | Hypothetical protein                               | 3.62 |
| Mtr.6545.1.S1_x_at  | Hypothetical protein                               | 3.62 |
| Mtr.37417.1.S1_s_at | NuM1 protein                                       | 3.62 |
| Mtr.41563.1.S1_at   | Ring finger E3 ligase                              | 3.62 |
| Mtr.11369.1.S1_at   | Hypothetical protein                               | 3.62 |
| Mtr.37278.1.S1_at   | Cysteine synthase                                  | 3.62 |
| Mtr.4899.1.S1_at    | Hypothetical protein                               | 3.62 |
| Mtr.45415.1.S1_a_at | Deetiolated 1-like protein                         | 3.62 |
| Mtr.10747.1.S1_at   | Adenosine monophosphate binding protein            | 3.61 |
| Mtr.23686.1.S1_at   | DNA-directed RNA polymerase                        | 3.61 |
| Mtr.38306.1.S1_at   | Choline transporter-like protein                   | 3.61 |
| Mtr.51256.1.S1_at   | Transferase                                        | 3.61 |
| Mtr.23653.1.S1_at   | Hypothetical protein                               | 3.61 |
| Mtr.14656.1.S1_at   | Hypothetical protein                               | 3.61 |
| Mtr.21943.1.S1_s_at | CYP83D1p                                           | 3.61 |
| Mtr.4402.1.S1_at    | Hypothetical protein                               | 3.61 |
| Mtr.36943.1.S1_at   | Hypothetical protein                               | 3.61 |
| Mtr.16854.1.S1_at   | Protein kinase                                     | 3.61 |
| Mtr.43954.1.S1_at   | Hypothetical protein                               | 3.61 |
| Mtr.43258.1.S1_s_at | Hypothetical protein                               | 3.60 |
| Mtr.37645.1.S1_at   | Hypothetical protein                               | 3.60 |
| Mtr.10728.1.S1_at   | Hypothetical protein                               | 3.60 |
| Mtr.43192.1.S1_at   | Mature anther-specific protein LAT61               | 3.60 |
| Mtr.28411.1.S1_s_at | Hypothetical protein                               | 3.60 |
| Mtr.12531.1.S1_s_at | Hypothetical protein                               | 3.60 |
| Mtr.27354.1.S1_s_at | RPM1-interacting protein 4                         | 3.60 |
| Mtr.10700.1.S1_at   | KCBP interacting Ca <sup>2+</sup> -binding protein | 3.60 |
| Mtr.38128.1.S1_s_at | Aldehyde dehydrogenase                             | 3.60 |
| Mtr.37422.1.S1_at   | Hypothetical protein                               | 3.59 |
| Mtr.41435.1.S1_s_at | Hypothetical protein                               | 3.59 |
| Mtr.37508.1.S1_at   | 4- Hydroxyphenylpyruvate Dioxygenases              | 3.59 |
| Mtr.50583.1.S1_at   | Glycoside hydrolase                                | 3.59 |
| Mtr.42149.1.S1_at   | Hypothetical protein                               | 3.59 |
| Mtr.25204.1.S1_s_at | Calmodulin-binding protein                         | 3.59 |
| Mtr.15543.1.S1_at   | Peptidylprolyl isomerase, FKBP-type                | 3.58 |
| Mtr.5620.1.S1_at    | Membrane cofactor protein                          | 3.58 |
| Mtr.33373.1.S1_at   | Hypothetical protein                               | 3.58 |
| Mtr.42860.1.S1_at   | Ferredoxin III                                     | 3.58 |
| Mtr.44291.1.S1_at   | Hypothetical protein                               | 3.58 |
| Mtr.51366.1.S1_s_at | RNA-binding region RNP-1                           | 3.58 |
| Mtr.40888.1.S1_at   | E3 ubiquitin ligase                                | 3.58 |
| Mtr.31724.1.S1_at   | Hypothetical protein                               | 3.58 |
| Mtr.6886.1.S1_at    | Hypothetical protein                               | 3.58 |
| Mtr.37900.1.S1_at   | Pantothenate kinase 1                              | 3.58 |
| Mtr.12154.1.S1_at   | Hypothetical protein                               | 3.58 |
| Mtr.10320.1.S1_at   | Uricase                                            | 3.57 |
| Mtr.26364.1.S1_at   | Hypothetical protein                               | 3.57 |
| Mtr.17461.1.S1_at   | Hypothetical protein                               | 3.56 |
| Msa.1667.1.S1_at    | Hypothetical protein                               | 3.56 |
| Mtr.39837.1.S1_at   | Hypothetical protein                               | 3.56 |
| Mtr.16850.1.S1_at   | Curculin-like (mannose-binding) lectin             | 3.56 |

|                     |                                                     |      |
|---------------------|-----------------------------------------------------|------|
| Mtr.11604.1.S1_s_at | Hypothetical protein                                | 3.56 |
| Mtr.16393.1.S1_at   | Hypothetical protein                                | 3.56 |
| Mtr.38482.1.S1_at   | Hypothetical protein                                | 3.56 |
| Mtr.13244.1.S1_at   | Hypothetical protein                                | 3.56 |
| Mtr.4546.1.S1_s_at  | E3 ubiquitin ligase                                 | 3.56 |
| Mtr.44290.1.S1_at   | Hypothetical protein                                | 3.56 |
| Mtr.36788.1.S1_at   | Hypothetical protein                                | 3.56 |
| Msa.1673.1.S1_at    | Hypothetical protein                                | 3.56 |
| Mtr.15716.1.S1_at   | WD40-like protein                                   | 3.56 |
| Mtr.5457.1.S1_at    | Transducin-like protein                             | 3.55 |
| Mtr.19469.1.S1_at   | Hypothetical protein                                | 3.55 |
| Mtr.42760.1.S1_at   | Hypothetical protein                                | 3.55 |
| Mtr.27895.1.S1_at   | Ser/Thr protein phosphatase 2C                      | 3.55 |
| Mtr.24817.1.S1_at   | Fructan 1-exohydrolase                              | 3.55 |
| Mtr.35606.1.S1_at   | Hypothetical protein                                | 3.55 |
| Mtr.38799.1.S1_s_at | Cytokinin oxidase                                   | 3.55 |
| Mtr.15257.1.S1_s_at | Hypothetical protein                                | 3.55 |
| Mtr.42336.1.S1_at   | WRKY transcription factor 48                        | 3.55 |
| Mtr.31731.1.S1_at   | Eukaryotic initiation factor                        | 3.55 |
| Mtr.31446.1.S1_x_at | Hypothetical protein                                | 3.54 |
| Mtr.41041.1.S1_at   | Notchless protein homolog                           | 3.54 |
| Mtr.43547.1.S1_at   | Hypothetical protein                                | 3.54 |
| Mtr.21943.1.S1_x_at | CYP83D1p                                            | 3.54 |
| Mtr.13414.1.S1_at   | ABC-type transporter                                | 3.54 |
| Mtr.10424.1.S1_at   | Ethylene responsive element binding factor          | 3.54 |
| Mtr.15744.1.S1_at   | Hypothetical protein                                | 3.54 |
| Mtr.34197.1.S1_at   | Hypothetical protein                                | 3.54 |
| Mtr.36809.1.S1_at   | Hypothetical protein                                | 3.53 |
| Msa.1038.1.S1_at    | Hypothetical protein                                | 3.53 |
| Mtr.428.1.S1_at     | Leucine rich repeat protein                         | 3.53 |
| Mtr.32968.1.S1_at   | Mitochondrial solute carrier protein                | 3.52 |
| Mtr.43953.1.S1_s_at | Hypothetical protein                                | 3.52 |
| Mtr.5572.1.S1_s_at  | CREB-like protein                                   | 3.52 |
| Mtr.19044.1.S1_at   | Hypothetical protein                                | 3.52 |
| Mtr.44176.1.S1_at   | Squalene monooxygenase 1                            | 3.52 |
| Mtr.2676.1.S1_at    | Hypothetical protein                                | 3.52 |
| Mtr.37901.1.S1_at   | Hypothetical protein                                | 3.52 |
| Mtr.51291.1.S1_at   | Pathogenesis-related transcriptional factor and ERF | 3.52 |
| Mtr.10425.1.S1_at   | Ethylene responsive element binding factor          | 3.51 |
| Mtr.17506.1.S1_at   | ATPase, E1-E2                                       | 3.51 |
| Mtr.33247.1.S1_at   | Hypothetical protein                                | 3.51 |
| Msa.1220.1.S1_at    | Hypothetical protein                                | 3.51 |
| Mtr.13077.1.S1_at   | Hypothetical protein                                | 3.51 |
| Mtr.8704.1.S1_at    | Hypothetical protein                                | 3.51 |
| Mtr.3225.1.S1_at    | Hypothetical protein                                | 3.50 |
| Mtr.35440.1.S1_at   | Hypothetical protein                                | 3.50 |
| Mtr.2486.1.S1_at    | Hypothetical protein                                | 3.50 |
| Mtr.33034.1.S1_at   | Chromobox protein                                   | 3.50 |
| Mtr.10360.1.S1_s_at | ER6 protein                                         | 3.50 |
| Mtr.33389.1.S1_at   | Hypothetical protein                                | 3.50 |
| Mtr.4041.1.S1_at    | Nucleic acid binding protein                        | 3.50 |
| Mtr.12973.1.S1_at   | Prohibitin 1-like protein                           | 3.50 |
| Mtr.21812.1.S1_at   | Hypothetical protein                                | 3.49 |
| Mtr.44464.1.S1_at   | Elongation factor G                                 | 3.49 |

|                     |                                          |      |
|---------------------|------------------------------------------|------|
| Mtr.13657.1.S1_at   | Hypothetical protein                     | 3.49 |
| Mtr.2537.1.S1_a_at  | Heterogeneous nuclear ribonucleoprotein  | 3.49 |
| Mtr.32940.1.S1_at   | N-hydroxycinnamoyl/benzoyltransferase    | 3.49 |
| Mtr.12047.1.S1_at   | Hypothetical protein                     | 3.49 |
| Mtr.44333.1.S1_s_at | Hypothetical protein                     | 3.49 |
| Mtr.13103.1.S1_at   | Hypothetical protein                     | 3.49 |
| Mtr.48306.1.S1_at   | Hypothetical protein                     | 3.49 |
| Mtr.5955.1.S1_at    | Hypothetical protein                     | 3.49 |
| Mtr.33536.1.S1_at   | Sugar transporter-like protein           | 3.49 |
| Mtr.45548.1.S1_at   | Hypothetical protein                     | 3.49 |
| Mtr.9872.1.S1_at    | Hypothetical protein                     | 3.49 |
| Mtr.37899.1.S1_at   | Hypothetical protein                     | 3.49 |
| Mtr.34150.1.S1_at   | Hypothetical protein                     | 3.48 |
| Mtr.39206.1.S1_at   | Hypothetical protein                     | 3.48 |
| Mtr.29990.1.S1_at   | MYB-related protein                      | 3.48 |
| Mtr.17531.1.S1_at   | Hypothetical protein                     | 3.48 |
| Msa.690.1.S1_at     | Hypothetical protein                     | 3.48 |
| Mtr.49199.1.S1_at   | Hypothetical protein                     | 3.48 |
| Mtr.11804.1.S1_s_at | Hypothetical protein                     | 3.48 |
| Mtr.8797.1.S1_at    | 60S ribosomal protein L34                | 3.48 |
| Mtr.44619.1.S1_at   | Hypothetical protein                     | 3.48 |
| Mtr.33204.1.S1_at   | Hypothetical protein                     | 3.48 |
| Mtr.39641.1.S1_at   | Protein kinase                           | 3.48 |
| Mtr.35791.1.S1_s_at | Light-induced protein                    | 3.48 |
| Mtr.7449.1.S1_at    | GDSL-motif lipase/hydrolase-like protein | 3.47 |
| Mtr.394.1.S1_s_at   | Pre-mRNA splicing factor SF2             | 3.47 |
| Msa.432.1.S1_at     | Hypothetical protein                     | 3.47 |
| Mtr.34926.1.S1_s_at | Hypothetical protein                     | 3.47 |
| Mtr.51725.1.S1_at   | Hypothetical protein                     | 3.47 |
| Mtr.37513.1.S1_at   | RelA-SpoT like protein                   | 3.47 |
| Mtr.48411.1.S1_s_at | Beta-galactosidase                       | 3.47 |
| Mtr.9399.1.S1_at    | CDPK-related protein kinase              | 3.47 |
| Mtr.39404.1.S1_at   | Hypothetical protein                     | 3.47 |
| Msa.1723.1.S1_at    | Hypothetical protein                     | 3.46 |
| Mtr.39464.1.S1_s_at | Hypothetical protein                     | 3.46 |
| Mtr.40132.1.S1_at   | Peroxidase IA                            | 3.46 |
| Mtr.50087.1.S1_at   | Hypothetical protein                     | 3.46 |
| Mtr.34957.1.S1_at   | Beta-glucosidase                         | 3.46 |
| Mtr.13078.1.S1_s_at | Hypothetical protein                     | 3.46 |
| Mtr.46539.1.S1_at   | bZIP DNA-binding protein                 | 3.45 |
| Mtr.4600.1.S1_at    | Guanylyl cyclase alpha                   | 3.45 |
| Mtr.9552.1.S1_at    | Protein kinase                           | 3.45 |
| Mtr.41653.1.S1_at   | Mitochondrial phosphate translocator     | 3.45 |
| Msa.3090.1.S1_at    | Hypothetical protein                     | 3.45 |
| Mtr.21812.1.S1_s_at | Hypothetical protein                     | 3.45 |
| Mtr.24633.1.S1_at   | Hypothetical protein                     | 3.45 |
| Mtr.41934.1.S1_at   | Pupal cuticle protein                    | 3.45 |
| Mtr.44172.1.S1_at   | Hypothetical protein                     | 3.45 |
| Mtr.28723.1.S1_at   | Hypothetical protein                     | 3.45 |
| Mtr.47542.1.S1_at   | Hydrolase, alpha/beta fold family        | 3.45 |
| Msa.2283.1.S1_at    | Hypothetical protein                     | 3.44 |
| Mtr.12417.1.S1_s_at | Hypothetical protein                     | 3.44 |
| Mtr.5557.1.S1_at    | Hypothetical protein                     | 3.44 |
| Mtr.44735.1.S1_at   | Hypothetical protein                     | 3.44 |

|                     |                                                    |      |
|---------------------|----------------------------------------------------|------|
| Mtr.39304.1.S1_at   | Hypothetical protein                               | 3.44 |
| Mtr.8782.1.S1_at    | Hypothetical protein                               | 3.44 |
| Mtr.44964.1.S1_at   | Hypothetical protein                               | 3.44 |
| Mtr.18004.1.S1_at   | Cwf15/Cwc15 cell cycle control protein             | 3.44 |
| Mtr.37413.1.S1_s_at | Chalcone-flavonone isomerase                       | 3.44 |
| Mtr.40096.1.S1_at   | ER6 protein                                        | 3.44 |
| Mtr.40417.1.S1_at   | Hypothetical protein                               | 3.43 |
| Mtr.7249.1.S1_at    | N-hydroxycinnamoyl/benzoyltransferase-like protein | 3.43 |
| Mtr.6589.1.S1_at    | Mitochondrial solute carrier protein               | 3.43 |
| Mtr.1853.1.S1_at    | Hypothetical protein                               | 3.43 |
| Mtr.41180.1.S1_at   | Hypothetical protein                               | 3.43 |
| Mtr.32998.1.S1_s_at | MtN3                                               | 3.43 |
| Mtr.5996.1.S1_at    | Hypothetical protein                               | 3.43 |
| Mtr.7647.1.S1_at    | EF-1-alpha-related GTP-binding protein             | 3.43 |
| Mtr.8957.1.S1_at    | Hypothetical protein                               | 3.43 |
| Mtr.5069.1.S1_at    | MYB transcription factor                           | 3.42 |
| Mtr.48412.1.S1_s_at | Beta-galactosidase                                 | 3.42 |
| Mtr.12415.1.S1_at   | Hypothetical protein                               | 3.42 |
| Mtr.27828.1.S1_at   | Phospholipase D delta isoform 1a                   | 3.42 |
| Msa.591.1.S1_at     | Hypothetical protein                               | 3.42 |
| Mtr.29585.1.S1_at   | Hypothetical protein                               | 3.42 |
| Mtr.6936.1.S1_at    | Mitogen-activated protein kinase 7                 | 3.42 |
| Mtr.18691.1.S1_s_at | Hypothetical protein                               | 3.42 |
| Mtr.1533.1.S1_at    | Hypothetical protein                               | 3.41 |
| Mtr.9940.1.S1_at    | Hypothetical protein                               | 3.41 |
| Mtr.11250.1.S1_at   | Disease resistance protein                         | 3.41 |
| Mtr.691.1.S1_at     | Hypothetical protein                               | 3.41 |
| Mtr.51701.1.S1_s_at | Cyclin-like F-box protein                          | 3.41 |
| Mtr.10508.1.S1_at   | Mitosis inhibitor protein kinase weel              | 3.41 |
| Mtr.35305.1.S1_at   | Hypothetical protein                               | 3.40 |
| Mtr.40185.1.S1_at   | FtsH-like protein                                  | 3.40 |
| Mtr.43451.1.S1_at   | Adenosine monophosphate binding protein 7          | 3.40 |
| Mtr.4322.1.S1_at    | Cytochrome oxidase subunit III                     | 3.40 |
| Mtr.37960.1.S1_at   | PRL1-associated protein                            | 3.40 |
| Mtr.33159.1.S1_at   | Hypothetical protein                               | 3.40 |
| Mtr.38936.1.S1_at   | Acyl-CoA oxidase                                   | 3.40 |
| Mtr.5527.1.S1_at    | PHD zinc finger protein                            | 3.39 |
| Mtr.37580.1.S1_at   | Brix domain containing protein 1                   | 3.39 |
| Mtr.43936.1.S1_at   | Ser/Thr protein kinase                             | 3.39 |
| Mtr.40054.1.S1_at   | J8-like protein                                    | 3.39 |
| Mtr.41945.1.S1_at   | Hypothetical protein                               | 3.39 |
| Mtr.49019.1.S1_at   | Glycoside hydrolase                                | 3.39 |
| Msa.277.1.S1_at     | Hypothetical protein                               | 3.39 |
| Msa.3160.1.S1_at    | Hypothetical protein                               | 3.38 |
| Mtr.2361.1.S1_s_at  | MAP kinase activating protein                      | 3.38 |
| Mtr.31259.1.S1_s_at | Plasma membrane intrinsic polypeptide              | 3.38 |
| Mtr.6345.1.S1_at    | DnaJ-like protein                                  | 3.38 |
| Mtr.43957.1.S1_s_at | Peroxisomal copper-containing amine oxidase        | 3.38 |
| Mtr.39253.1.S1_at   | Hypothetical protein                               | 3.38 |
| Mtr.41678.1.S1_at   | Hypothetical protein                               | 3.38 |
| Mtr.5174.1.S1_at    | Hypothetical protein                               | 3.38 |
| Mtr.40474.1.S1_at   | Ribosomal protein 30S                              | 3.38 |
| Mtr.38510.1.S1_at   | Hypothetical protein                               | 3.38 |
| Mtr.41732.1.S1_at   | Hypothetical protein                               | 3.38 |

|                     |                                       |      |
|---------------------|---------------------------------------|------|
| Mtr.5164.1.S1_at    | Hypothetical protein                  | 3.37 |
| Mtr.37502.1.S1_at   | Dermal glycoprotein                   | 3.37 |
| Mtr.15028.1.S1_at   | Transketolase                         | 3.37 |
| Mtr.39546.1.S1_at   | Hypothetical protein                  | 3.37 |
| Mtr.48875.1.S1_s_at | Hypothetical protein                  | 3.37 |
| Mtr.39626.1.S1_at   | MAP kinase activating protein         | 3.36 |
| Mtr.12264.1.S1_s_at | Cytochrome P450 monooxygenase         | 3.36 |
| Mtr.42399.1.S1_at   | Type IIA calcium ATPase               | 3.36 |
| Mtr.39049.1.S1_at   | WD40-repeat protein                   | 3.36 |
| Mtr.37798.1.S1_at   | Hypothetical protein                  | 3.36 |
| Msa.1774.1.S1_at    | Hypothetical protein                  | 3.36 |
| Mtr.39873.1.S1_s_at | Myb-like protein                      | 3.36 |
| Mtr.49932.1.S1_at   | Ankyrin                               | 3.36 |
| Mtr.45488.1.S1_at   | Calmodulin-binding protein            | 3.36 |
| Mtr.12917.1.S1_at   | Jasmonic acid 2                       | 3.36 |
| Mtr.7126.1.S1_s_at  | Bat3 protein                          | 3.35 |
| Mtr.49671.1.S1_at   | Hypothetical protein                  | 3.35 |
| Mtr.8978.1.S1_at    | Hypothetical protein                  | 3.35 |
| Mtr.42930.1.S1_at   | Hypothetical protein                  | 3.35 |
| Mtr.12906.1.S1_at   | Glutamate decarboxylase 4a            | 3.35 |
| Mtr.34601.1.S1_s_at | SOS2-like protein kinase              | 3.35 |
| Mtr.38607.1.S1_at   | Hypothetical protein                  | 3.35 |
| Mtr.6016.1.S1_at    | Hypothetical protein                  | 3.35 |
| Mtr.781.1.S1_at     | SKP1 interacting partner 1            | 3.35 |
| Mtr.9656.1.S1_at    | Response regulator protein            | 3.35 |
| Mtr.9221.1.S1_at    | Salicylic acid glucosyltransferase    | 3.35 |
| Mtr.28490.1.S1_at   | Hypothetical protein                  | 3.35 |
| Mtr.5072.1.S1_s_at  | Hypothetical protein                  | 3.35 |
| Mtr.13558.1.S1_at   | Beta-galactosidase                    | 3.34 |
| Mtr.2544.1.S1_s_at  | Hypothetical protein                  | 3.34 |
| Mtr.38691.1.S1_s_at | Hypothetical protein                  | 3.34 |
| Mtr.44967.1.S1_at   | Hypothetical protein                  | 3.34 |
| Mtr.11984.1.S1_s_at | Hypothetical protein                  | 3.33 |
| Mtr.37833.1.S1_at   | Hypothetical protein                  | 3.33 |
| Mtr.27313.1.S1_at   | Receptor kinase-like protein          | 3.33 |
| Mtr.16505.1.S1_at   | Aldehyde dehydrogenase                | 3.33 |
| Mtr.50478.1.S1_at   | Phenylalanine/histidine ammonia-lyase | 3.33 |
| Mtr.3533.1.S1_at    | Hypothetical protein                  | 3.33 |
| Mtr.31759.1.S1_at   | Homeobox-leucine zipper protein       | 3.33 |
| Mtr.11772.1.S1_at   | Beta-galactosidase                    | 3.33 |
| Mtr.52065.1.S1_at   | WD-40 repeat protein                  | 3.33 |
| Mtr.44059.1.S1_at   | SAR DNA-binding protein-1             | 3.32 |
| Mtr.40101.1.S1_s_at | 40S ribosomal protein S6              | 3.32 |
| Mtr.14280.1.S1_at   | Thioredoxin-related protein           | 3.32 |
| Mtr.5567.1.S1_at    | Hypothetical protein                  | 3.32 |
| Mtr.35717.1.S1_at   | Sugar transporter                     | 3.32 |
| Mtr.9201.1.S1_at    | Salt-induced AAA-Type ATPase          | 3.32 |
| Mtr.14428.1.S1_at   | Naringenin-chalcone synthase          | 3.32 |
| Mtr.377.1.S1_s_at   | Hypothetical protein                  | 3.32 |
| Mtr.2859.1.S1_at    | Disease resistance protein            | 3.32 |
| Mtr.12614.1.S1_at   | Resistance protein MG23               | 3.32 |
| Mtr.43924.1.S1_at   | Glutaredoxin-related protein          | 3.32 |
| Mtr.386.1.S1_at     | D-xylose proton-symporter             | 3.32 |
| Mtr.41654.1.S1_at   | Single-strand DNA binding protein     | 3.32 |

|                     |                                                                   |      |
|---------------------|-------------------------------------------------------------------|------|
| Mtr.4790.1.S1_at    | Hypothetical protein                                              | 3.32 |
| Mtr.15172.1.S1_at   | Leucine-rich repeat protein                                       | 3.31 |
| Mtr.40406.1.S1_at   | Hypothetical protein                                              | 3.31 |
| Mtr.28378.1.S1_at   | Hypothetical protein                                              | 3.31 |
| Mtr.38381.1.S1_at   | Hypothetical protein                                              | 3.31 |
| Mtr.12085.1.S1_at   | Serine/threonine-protein kinase-like protein, partial (23%)       | 3.31 |
| Mtr.32685.1.S1_at   | Hypothetical protein                                              | 3.31 |
| Mtr.39867.1.S1_at   | Hypothetical protein                                              | 3.31 |
| Mtr.14111.1.S1_at   | Plant lipid transfer/seed storage/trypsin-alpha amylase inhibitor | 3.31 |
| Mtr.8962.1.S1_at    | Hypothetical protein                                              | 3.31 |
| Mtr.2811.1.S1_at    | Hypothetical protein                                              | 3.31 |
| Mtr.45462.1.S1_at   | Monosaccharide transporter                                        | 3.30 |
| Mtr.41518.1.S1_at   | Hypothetical protein                                              | 3.30 |
| Mtr.39656.1.S1_s_at | Hypothetical protein                                              | 3.30 |
| Mtr.36256.1.S1_at   | Hypothetical protein                                              | 3.30 |
| Mtr.33189.1.S1_s_at | AML1                                                              | 3.30 |
| Mtr.45278.1.S1_s_at | Hypothetical protein                                              | 3.30 |
| Mtr.52180.1.S1_at   | Zn-finger, C2H2 type                                              | 3.30 |
| Mtr.16016.1.S1_at   | Hypothetical protein                                              | 3.30 |
| Mtr.28463.1.S1_at   | Myosin-like protein                                               | 3.29 |
| Mtr.12698.1.S1_at   | Hypothetical protein                                              | 3.29 |
| Mtr.11251.1.S1_at   | Protein integral membrane protein                                 | 3.29 |
| Mtr.43601.1.S1_at   | 50S ribosomal protein L3-2                                        | 3.29 |
| Mtr.43669.1.S1_at   | Dolichyl-phosphate beta-glucosyltransferase                       | 3.29 |
| Mtr.44404.1.S1_s_at | Hypothetical protein                                              | 3.29 |
| Mtr.4897.1.S1_at    | Hypothetical protein                                              | 3.29 |
| Msa.2526.1.S1_s_at  | Hypothetical protein                                              | 3.29 |
| Mtr.44920.1.S1_at   | FtsH protease (VAR2)                                              | 3.29 |
| Mtr.13765.1.S1_at   | Sphingosine-1-phosphate lyase                                     | 3.29 |
| Msa.3057.1.S1_s_at  | Hypothetical protein                                              | 3.28 |
| Mtr.40053.1.S1_at   | Serine/threonine protein kinase                                   | 3.28 |
| Mtr.44647.1.S1_at   | DNA/RNA binding protein                                           | 3.28 |
| Mtr.10634.1.S1_at   | MONOSACCHARIDE cotransporter                                      | 3.28 |
| Mtr.32004.1.S1_at   | Pelota-like protein                                               | 3.28 |
| Mtr.35786.1.S1_at   | Hypothetical protein                                              | 3.28 |
| Msa.3020.1.S1_at    | Hypothetical protein                                              | 3.28 |
| Mtr.11064.1.S1_at   | DNA-directed RNA polymerase                                       | 3.28 |
| Mtr.13840.1.S1_at   | MYB transcription factor                                          | 3.28 |
| Mtr.5738.1.S1_s_at  | Hypothetical protein                                              | 3.28 |
| Mtr.50347.1.S1_at   | ATP-dependent helicase                                            | 3.28 |
| Mtr.31406.1.S1_x_at | Isoflavonoid glucosyltransferase                                  | 3.27 |
| Mtr.43217.1.S1_at   | Hypothetical protein                                              | 3.27 |
| Mtr.7377.1.S1_at    | Germin-like protein                                               | 3.27 |
| Mtr.43084.1.S1_at   | Hypothetical protein                                              | 3.27 |
| Mtr.6988.1.S1_at    | Hypothetical protein                                              | 3.27 |
| Mtr.25306.1.S1_at   | Prolyl 4-hydroxylase                                              | 3.27 |
| Mtr.12901.1.S1_at   | Hypothetical protein                                              | 3.27 |
| Msa.3111.1.S1_x_at  | Hypothetical protein                                              | 3.27 |
| Mtr.42711.1.S1_at   | Scarecrow-like 1 protein                                          | 3.27 |
| Mtr.10618.1.S1_x_at | Hypothetical protein                                              | 3.27 |
| Mtr.10594.1.S1_at   | Xyloglucan endo-1,4-beta-D-glucanase                              | 3.27 |
| Msa.1937.1.S1_at    | Hypothetical protein                                              | 3.27 |
| Mtr.17499.1.S1_at   | tRNA intron endonuclease                                          | 3.27 |
| Mtr.39534.1.S1_at   | Hypothetical protein                                              | 3.27 |

|                     |                                                            |      |
|---------------------|------------------------------------------------------------|------|
| Mtr.17501.1.S1_at   | Pectin lyase                                               | 3.27 |
| Mtr.42712.1.S1_at   | Mitochondrial carrier-like protein                         | 3.27 |
| Mtr.35896.1.S1_at   | Chitinase                                                  | 3.26 |
| Mtr.3520.1.S1_s_at  | Exo-beta-glucanase                                         | 3.26 |
| Mtr.12152.1.S1_at   | Protein phosphatase 2C                                     | 3.26 |
| Msa.1472.1.S1_at    | Hypothetical protein                                       | 3.26 |
| Mtr.44947.1.S1_at   | TFIIIE-alpha 2                                             | 3.26 |
| Mtr.38799.1.S1_at   | Cytokinin oxidase                                          | 3.26 |
| Mtr.29867.1.S1_at   | Hypothetical protein                                       | 3.26 |
| Mtr.42126.1.S1_at   | DNA-binding protein                                        | 3.26 |
| Mtr.42101.1.S1_at   | Hypothetical protein                                       | 3.26 |
| Mtr.43608.1.S1_at   | rRNA processing protein EBP2                               | 3.25 |
| Msa.1290.1.S1_at    | Hypothetical protein                                       | 3.25 |
| Mtr.11031.1.S1_s_at | Hypothetical protein                                       | 3.25 |
| Mtr.17368.1.S1_at   | Galactose oxidase                                          | 3.25 |
| Mtr.9119.1.S1_at    | Phloem-specific lectin-like protein                        | 3.25 |
| Mtr.41067.1.S1_at   | Hypothetical protein                                       | 3.25 |
| Mtr.37573.1.S1_at   | ADR6 protein                                               | 3.25 |
| Mtr.29891.1.S1_at   | Hypothetical protein                                       | 3.25 |
| Mtr.6418.1.S1_s_at  | Hypothetical protein                                       | 3.25 |
| Mtr.50388.1.S1_at   | Hypothetical protein                                       | 3.24 |
| Mtr.42915.1.S1_at   | Hypothetical protein                                       | 3.24 |
| Mtr.50504.1.S1_at   | Protein kinase                                             | 3.24 |
| Mtr.11078.1.S1_at   | Hypothetical protein                                       | 3.24 |
| Mtr.24721.1.S1_at   | Heat shock transcription factor                            | 3.24 |
| Mtr.51222.1.S1_at   | Disease resistance protein                                 | 3.24 |
| Mtr.35836.1.S1_at   | Hypothetical protein                                       | 3.24 |
| Mtr.35925.1.S1_at   | Hypothetical protein                                       | 3.24 |
| Mtr.12432.1.S1_at   | NADH-dependent glutamate synthase                          | 3.24 |
| Mtr.48971.1.S1_at   | Cytochrome oxidase                                         | 3.24 |
| Mtr.32912.1.S1_at   | Hypothetical protein                                       | 3.23 |
| Mtr.51148.1.S1_at   | Transferase                                                | 3.23 |
| Msa.464.1.S1_at     | Hypothetical protein                                       | 3.23 |
| Mtr.32496.1.S1_at   | Hypothetical protein                                       | 3.23 |
| Mtr.50156.1.S1_at   | Hypothetical protein                                       | 3.23 |
| Mtr.12913.1.S1_at   | Hypothetical protein                                       | 3.23 |
| Mtr.4879.1.S1_at    | Methylesterase                                             | 3.23 |
| Mtr.1082.1.S1_at    | Aldose 1-epimerase                                         | 3.23 |
| Mtr.7570.1.S1_at    | Hypothetical protein                                       | 3.23 |
| Mtr.39020.1.S1_at   | Ethylene receptor homolog                                  | 3.23 |
| Msa.1153.1.S1_at    | Hypothetical protein                                       | 3.23 |
| Mtr.7350.1.S1_at    | Hypothetical protein                                       | 3.23 |
| Mtr.48736.1.S1_at   | Disease resistance protein                                 | 3.23 |
| Mtr.9830.1.S1_at    | Expansin                                                   | 3.23 |
| Mtr.27185.1.S1_at   | Cytochrome P450                                            | 3.23 |
| Mtr.30173.1.S1_at   | WRKY transcription factor                                  | 3.23 |
| Mtr.49556.1.S1_at   | RNA polymerase Rpb1                                        | 3.23 |
| Mtr.43011.1.S1_at   | Ubiquitin-conjugating enzyme E2                            | 3.23 |
| Mtr.44341.1.S1_at   | BRASSINOSTEROID INSENSITIVE 1-associated receptor kinase 1 | 3.23 |
| Mtr.1526.1.S1_at    | Hypothetical protein                                       | 3.23 |
| Mtr.27676.1.S1_x_at | Hypothetical protein                                       | 3.23 |
| Mtr.50225.1.S1_at   | Hypothetical protein                                       | 3.22 |
| Mtr.3061.1.S1_s_at  | Hypothetical protein                                       | 3.22 |
| Mtr.6696.1.S1_at    | Hypothetical protein                                       | 3.22 |

|                     |                                                               |      |
|---------------------|---------------------------------------------------------------|------|
| Mtr.43175.1.S1_s_at | Hypothetical protein                                          | 3.22 |
| Mtr.41694.1.S1_s_at | AP2 domain transcription factor                               | 3.22 |
| Mtr.42375.1.S1_at   | Hypothetical protein                                          | 3.22 |
| Mtr.12859.1.S1_at   | Hypothetical protein                                          | 3.21 |
| Mtr.35758.1.S1_at   | NONA protein                                                  | 3.21 |
| Mtr.45586.1.S1_at   | Hypothetical protein                                          | 3.21 |
| Mtr.17492.1.S1_at   | Hypothetical protein                                          | 3.21 |
| Mtr.39500.1.S1_at   | Avr9/Cf-9 rapidly elicited protein                            | 3.21 |
| Mtr.28524.1.S1_at   | Hypothetical protein                                          | 3.21 |
| Mtr.38609.1.S1_at   | Hypothetical protein                                          | 3.21 |
| Mtr.37250.1.S1_at   | Hypothetical protein                                          | 3.21 |
| Mtr.42141.1.S1_s_at | Class III peroxidase                                          | 3.21 |
| Mtr.33923.1.S1_at   | TRANSMEMBRANE PROTEIN                                         | 3.21 |
| Mtr.4454.1.S1_at    | Hypothetical protein                                          | 3.20 |
| Mtr.4734.1.S1_at    | Hypothetical protein                                          | 3.20 |
| Mtr.12226.1.S1_s_at | Hypothetical protein                                          | 3.20 |
| Mtr.52344.1.S1_at   | Aminotransferase                                              | 3.20 |
| Mtr.42391.1.S1_at   | Hypothetical protein                                          | 3.20 |
| Mtr.28454.1.S1_at   | Hypothetical protein                                          | 3.20 |
| Mtr.10717.1.S1_at   | Twin LOV protein 1                                            | 3.20 |
| Mtr.16726.1.S1_at   | Leucine-rich repeat protein                                   | 3.20 |
| Mtr.9938.1.S1_at    | Dihydrodipicolinate synthase                                  | 3.20 |
| Mtr.40911.1.S1_s_at | Cationic peroxidase 2                                         | 3.20 |
| Mtr.43953.1.S1_at   | Hypothetical protein                                          | 3.20 |
| Mtr.9077.1.S1_at    | Hypothetical protein                                          | 3.20 |
| Mtr.787.1.S1_at     | Hypothetical protein                                          | 3.20 |
| Mtr.19608.1.S1_s_at | Hypothetical protein                                          | 3.20 |
| Mtr.17645.1.S1_at   | Hypothetical protein                                          | 3.20 |
| Mtr.13479.1.S1_at   | Transducin-like protein                                       | 3.19 |
| Mtr.37977.1.S1_at   | Cyclophilin                                                   | 3.19 |
| Mtr.45405.1.S1_at   | Hypothetical protein                                          | 3.19 |
| Mtr.9120.1.S1_at    | Hypothetical protein                                          | 3.19 |
| Mtr.38518.1.S1_at   | Hypothetical protein                                          | 3.19 |
| Mtr.18420.1.S1_at   | Adenylate cyclase                                             | 3.19 |
| Mtr.288.1.S1_at     | Hypothetical protein                                          | 3.19 |
| Msa.1280.1.S1_at    | Hypothetical protein                                          | 3.19 |
| Mtr.47143.1.S1_s_at | Brassinosteroid-regulated protein BRU1                        | 3.19 |
| Mtr.2952.1.S1_at    | Branched-chain alpha keto-acid dehydrogenase E1 alpha subunit | 3.19 |
| Mtr.36196.1.S1_s_at | Lipase                                                        | 3.19 |
| Mtr.13483.1.S1_at   | 13-lipoxygenase                                               | 3.19 |
| Mtr.49460.1.S1_s_at | RNA-binding region RNP-1                                      | 3.19 |
| Mtr.48899.1.S1_at   | Ferritin/ribonucleotide reductase                             | 3.19 |
| Mtr.10253.1.S1_at   | Cellulose synthase                                            | 3.19 |
| Mtr.5245.1.S1_at    | Hypothetical protein                                          | 3.19 |
| Mtr.10408.1.S1_at   | Ferrochelatae I                                               | 3.19 |
| Mtr.38325.1.S1_at   | Sphingosine-1-phosphate lyase                                 | 3.19 |
| Mtr.40193.1.S1_at   | Hypothetical protein                                          | 3.18 |
| Mtr.25749.1.S1_at   | Copper amine oxidase                                          | 3.18 |
| Mtr.34833.1.S1_s_at | Hypothetical protein                                          | 3.18 |
| Mtr.2087.1.S1_at    | Hypothetical protein                                          | 3.18 |
| Mtr.32750.1.S1_at   | Hypothetical protein                                          | 3.18 |
| Mtr.46966.1.S1_s_at | Wound-induced GSK-3-like protein                              | 3.18 |
| Mtr.10474.1.S1_at   | Autophagy protein 8                                           | 3.18 |
| Mtr.31085.1.S1_at   | Hypothetical protein                                          | 3.18 |



|                     |                                                   |      |
|---------------------|---------------------------------------------------|------|
| Mtr.9783.1.S1_at    | Zinc finger-like protein                          | 3.18 |
| Mtr.42879.1.S1_at   | Light-induced protein                             | 3.18 |
| Mtr.37801.1.S1_at   | Protein kinase                                    | 3.18 |
| Mtr.41884.1.S1_at   | Mei2-like protein                                 | 3.17 |
| Mtr.7199.1.S1_at    | Hypothetical protein                              | 3.17 |
| Mtr.9218.1.S1_at    | Hypothetical protein                              | 3.17 |
| Mtr.9429.1.S1_at    | Transcription factor RAU1                         | 3.17 |
| Mtr.45108.1.S1_at   | ABC-type cobalamin/Fe3+-siderophores transport    | 3.17 |
| Mtr.49142.1.S1_at   | Hypothetical protein                              | 3.17 |
| Mtr.23686.1.S1_s_at | DNA-directed RNA polymerase                       | 3.17 |
| Mtr.11323.1.S1_at   | F-box protein                                     | 3.17 |
| Mtr.45354.1.S1_at   | Whitefly-induced gp91-phox                        | 3.16 |
| Msa.1740.1.S1_at    | Hypothetical protein                              | 3.16 |
| Mtr.39437.1.S1_at   | MRPS17 protein                                    | 3.16 |
| Mtr.28538.1.S1_at   | Hypothetical protein                              | 3.16 |
| Mtr.33245.1.S1_at   | Hypothetical protein                              | 3.16 |
| Mtr.1563.1.S1_at    | SRG1 protein                                      | 3.16 |
| Mtr.41373.1.S1_at   | Phi-1-like protein                                | 3.16 |
| Mtr.50948.1.S1_at   | Hypothetical protein                              | 3.16 |
| Mtr.43688.1.S1_at   | Hypothetical protein                              | 3.16 |
| Mtr.29288.1.S1_x_at | Hypothetical protein                              | 3.16 |
| Msa.1670.1.S1_at    | Hypothetical protein                              | 3.15 |
| Mtr.32311.1.S1_at   | Dynein light chain 1                              | 3.15 |
| Mtr.37171.1.S1_at   | Hypothetical protein                              | 3.15 |
| Mtr.43611.1.S1_at   | WRKY transcription factor 65                      | 3.15 |
| Mtr.15702.1.S1_s_at | Zn-finger protein                                 | 3.15 |
| Mtr.13158.1.S1_at   | S-receptor kinase                                 | 3.15 |
| Mtr.50884.1.S1_s_at | Hypothetical protein                              | 3.15 |
| Mtr.35604.1.S1_at   | Lipase family protein                             | 3.15 |
| Msa.3101.1.S1_at    | Hypothetical protein                              | 3.15 |
| Mtr.37419.1.S1_at   | NuM1 protein                                      | 3.15 |
| Mtr.3292.1.S1_at    | Hypothetical protein                              | 3.15 |
| Mtr.11560.1.S1_s_at | ADP/ATP translocase-like protein                  | 3.15 |
| Mtr.38140.1.S1_at   | Zinc finger protein                               | 3.15 |
| Mtr.40007.1.S1_at   | Hypothetical protein                              | 3.15 |
| Mtr.10462.1.S1_at   | Non-symbiotic hemoglobin 1                        | 3.14 |
| Mtr.41454.1.S1_at   | Farnesylated protein                              | 3.14 |
| Mtr.45545.1.S1_at   | Hypothetical protein                              | 3.14 |
| Mtr.41247.1.S1_at   | Hypothetical protein                              | 3.14 |
| Mtr.25327.1.S1_at   | Hypothetical protein                              | 3.14 |
| Mtr.12589.1.S1_at   | Acetyl-CoA carboxylase                            | 3.14 |
| Mtr.41270.1.S1_at   | Beta-adaptin-like protein A                       | 3.14 |
| Mtr.6811.1.S1_s_at  | Glutathione S-transferase GST 17                  | 3.14 |
| Mtr.40736.1.S1_s_at | STAM binding protein                              | 3.14 |
| Mtr.40569.1.S1_at   | Alpha-mannosidase                                 | 3.14 |
| Mtr.24032.1.S1_at   | Hypothetical protein                              | 3.14 |
| Mtr.32884.1.S1_s_at | Jasmonic acid 2                                   | 3.14 |
| Mtr.44195.1.S1_at   | Hypothetical protein                              | 3.14 |
| Mtr.10342.1.S1_at   | Xyloglucan endotransglucosylase/hydrolase protein | 3.13 |
| Mtr.38956.1.S1_at   | Hypothetical protein                              | 3.13 |
| Mtr.5980.1.S1_at    | Hypothetical protein                              | 3.13 |
| Mtr.17399.1.S1_at   | Peptidylprolyl isomerase, FKBP-type               | 3.13 |
| Msa.1761.1.S1_at    | Hypothetical protein                              | 3.13 |
| Mtr.13482.1.S1_at   | Ceramide kinase                                   | 3.13 |

|                     |                                                   |      |
|---------------------|---------------------------------------------------|------|
| Mtr.48831.1.S1_at   | Peptidase aspartic                                | 3.13 |
| Mtr.594.1.S1_s_at   | Functional candidate resistance protein KR1       | 3.12 |
| Mtr.10407.1.S1_at   | Ferrochelatase II                                 | 3.12 |
| Mtr.19308.1.S1_s_at | Cyclin-like F-box                                 | 3.12 |
| Mtr.7061.1.S1_at    | Hypothetical protein                              | 3.12 |
| Mtr.32008.1.S1_at   | Hypothetical protein                              | 3.12 |
| Mtr.22123.1.S1_at   | Hypothetical protein                              | 3.12 |
| Mtr.10224.1.S1_at   | MYB-like DNA-binding domain protein               | 3.12 |
| Mtr.4893.1.S1_at    | Hypothetical protein                              | 3.12 |
| Mtr.14125.1.S1_at   | Phytochrome                                       | 3.12 |
| Mtr.9754.1.S1_at    | Hypothetical protein                              | 3.12 |
| Mtr.45896.1.S1_at   | Translation initiation factor IF5                 | 3.12 |
| Mtr.20676.1.S1_at   | Hypothetical protein                              | 3.12 |
| Mtr.20265.1.S1_at   | Hypothetical protein                              | 3.12 |
| Mtr.37283.1.S1_s_at | Pathogen-inducible alpha-dioxygenase              | 3.12 |
| Mtr.44105.1.S1_at   | Nucleolar RNA-binding Nop10p-like protein         | 3.12 |
| Mtr.43799.1.S1_at   | Hypothetical protein                              | 3.12 |
| Mtr.1356.1.S1_s_at  | Hypothetical protein                              | 3.11 |
| Mtr.12000.1.S1_at   | Hypothetical protein                              | 3.11 |
| Mtr.39348.1.S1_at   | F-box protein ORE9                                | 3.11 |
| Msa.1709.1.S1_at    | Hypothetical protein                              | 3.11 |
| Mtr.30161.1.S1_s_at | Basic/leucine zipper protein                      | 3.11 |
| Mtr.49129.1.S1_s_at | Pumilio/Puf RNA-binding protein                   | 3.11 |
| Mtr.1511.1.S1_at    | UDP-glucosyl transferase                          | 3.11 |
| Msa.959.1.S1_at     | Hypothetical protein                              | 3.11 |
| Mtr.4918.1.S1_at    | S-receptor kinase                                 | 3.11 |
| Mtr.20784.1.S1_s_at | Lipase                                            | 3.10 |
| Mtr.9913.1.S1_s_at  | Hypothetical protein                              | 3.10 |
| Mtr.40725.1.S1_at   | Mannose-6-phosphate isomerase                     | 3.10 |
| Mtr.35057.1.S1_at   | 1-aminocyclopropane-1-carboxylate synthase 1      | 3.10 |
| Mtr.14252.1.S1_at   | Ribosomal protein L25                             | 3.10 |
| Mtr.33493.1.S1_at   | Hypothetical protein                              | 3.10 |
| Mtr.42251.1.S1_at   | Hypothetical protein                              | 3.10 |
| Mtr.27351.1.S1_at   | Protein kinase                                    | 3.10 |
| Mtr.18677.1.S1_s_at | Hypothetical protein                              | 3.09 |
| Mtr.39529.1.S1_at   | Tetratricopeptide repeat (TPR)-containing protein | 3.09 |
| Mtr.43227.1.S1_at   | 52 kDa Ro protein                                 | 3.09 |
| Mtr.15268.1.S1_at   | ADP-ribosylation factor                           | 3.09 |
| Mtr.24827.1.S1_at   | Hypothetical protein                              | 3.09 |
| Mtr.5689.1.S1_at    | Syntaxin-related protein                          | 3.09 |
| Mtr.11873.1.S1_at   | Ethylene-overproduction protein                   | 3.09 |
| Mtr.10732.1.S1_at   | Hypothetical protein                              | 3.09 |
| Mtr.46823.1.S1_at   | Calmodulin-binding protein                        | 3.09 |
| Mtr.34611.1.S1_at   | ZF-HD homeobox protein                            | 3.09 |
| Mtr.38531.1.S1_at   | Hypothetical protein                              | 3.08 |
| Mtr.39976.1.S1_s_at | AAA-type ATPase                                   | 3.08 |
| Msa.1686.1.S1_s_at  | Hypothetical protein                              | 3.08 |
| Mtr.43257.1.S1_at   | NAC-domain protein                                | 3.08 |
| Mtr.40988.1.S1_at   | Hypothetical protein                              | 3.08 |
| Mtr.19570.1.S1_at   | Pathogenesis-related transcriptional factor       | 3.08 |
| Mtr.40598.1.S1_at   | Hypothetical protein                              | 3.08 |
| Mtr.43265.1.S1_at   | Hypothetical protein                              | 3.08 |
| Mtr.42431.1.S1_at   | Hypothetical protein                              | 3.08 |
| Mtr.6559.1.S1_at    | Nucleoporin                                       | 3.08 |

|                     |                                                       |      |
|---------------------|-------------------------------------------------------|------|
| Mtr.9090.1.S1_at    | Hypothetical protein                                  | 3.08 |
| Mtr.48818.1.S1_at   | bZIP transcription factor                             | 3.08 |
| Mtr.17250.1.S1_at   | Spectrin repeat protein                               | 3.08 |
| Mtr.21025.1.S1_at   | Esterase/lipase/thioesterase                          | 3.08 |
| Mtr.33257.1.S1_s_at | Stromal membrane-associated protein                   | 3.08 |
| Mtr.38328.1.S1_at   | Phosphatidic acid phosphatase alpha                   | 3.08 |
| Mtr.8932.1.S1_at    | Geranylgeranylated protein                            | 3.08 |
| Mtr.28443.1.S1_s_at | Hypothetical protein                                  | 3.08 |
| Mtr.20407.1.S1_at   | Hypothetical protein                                  | 3.08 |
| Mtr.44887.1.S1_at   | Hypothetical protein                                  | 3.07 |
| Mtr.4658.1.S1_at    | Hypothetical protein                                  | 3.07 |
| Mtr.41303.1.S1_at   | Hypothetical protein                                  | 3.07 |
| Mtr.17083.1.S1_at   | Light chain 3 (LC3)                                   | 3.07 |
| Mtr.43104.1.S1_at   | 1-aminocyclopropanecarboxylic acid oxidase            | 3.07 |
| Mtr.22601.1.S1_s_at | Endoxyloglucan transferase                            | 3.07 |
| Mtr.37225.1.S1_at   | Adenine nucleotide translocator                       | 3.07 |
| Mtr.32578.1.S1_at   | Hypothetical protein                                  | 3.07 |
| Mtr.10793.1.S1_at   | STAM binding protein                                  | 3.07 |
| Mtr.39860.1.S1_at   | Hypothetical protein                                  | 3.07 |
| Mtr.42237.1.S1_at   | Hypothetical protein                                  | 3.07 |
| Mtr.38213.1.S1_at   | Hypothetical protein                                  | 3.07 |
| Mtr.11587.1.S1_at   | Hypothetical protein                                  | 3.07 |
| Mtr.49745.1.S1_s_at | Tyrosine specific protein phosphatase                 | 3.07 |
| Mtr.15535.1.S1_at   | Serine/threonine protein kinase                       | 3.06 |
| Mtr.30324.1.S1_at   | Hypothetical protein                                  | 3.06 |
| Mtr.6307.1.S1_at    | Drm3                                                  | 3.06 |
| Mtr.13157.1.S1_at   | Hypothetical protein                                  | 3.06 |
| Mtr.10803.1.S1_at   | Small nuclear riboprotein                             | 3.06 |
| Mtr.16958.1.S1_s_at | Proteinase inhibitor I9                               | 3.06 |
| Msa.2767.1.S1_at    | Hypothetical protein                                  | 3.06 |
| Mtr.38773.1.S1_at   | Protein kinase                                        | 3.06 |
| Mtr.30756.1.S1_s_at | Hypothetical protein                                  | 3.06 |
| Mtr.38660.1.S1_at   | Hypothetical protein                                  | 3.06 |
| Mtr.41990.1.S1_at   | Nodulin-like protein                                  | 3.06 |
| Msa.2923.1.S1_at    | Hypothetical protein                                  | 3.06 |
| Mtr.14271.1.S1_at   | Calcium-binding EF-hand                               | 3.06 |
| Mtr.20117.1.S1_s_at | Peptidyl-prolyl cis-trans isomerase, cyclophilin type | 3.06 |
| Msa.2396.1.S1_at    | Hypothetical protein                                  | 3.06 |
| Mtr.40703.1.S1_at   | Hypothetical protein                                  | 3.06 |
| Mtr.39780.1.S1_at   | Hypothetical protein                                  | 3.06 |
| Mtr.18911.1.S1_s_at | Serine/threonine protein kinase                       | 3.06 |
| Mtr.8301.1.S1_at    | BRI1-KD interacting protein                           | 3.06 |
| Mtr.2526.1.S1_at    | Hypothetical protein                                  | 3.06 |
| Mtr.39119.1.S1_at   | Timing of CAB expression 1                            | 3.06 |
| Mtr.18027.1.S1_at   | Ankyrin                                               | 3.05 |
| Mtr.21406.1.S1_s_at | Ankyrin                                               | 3.05 |
| Mtr.33080.1.S1_at   | Hypothetical protein                                  | 3.05 |
| Mtr.8828.1.S1_at    | Cytochrome P450                                       | 3.05 |
| Mtr.33207.1.S1_at   | Hypothetical protein                                  | 3.05 |
| Mtr.44938.1.S1_at   | Hypothetical protein                                  | 3.05 |
| Mtr.7077.1.S1_at    | Amino acid permease AAP4                              | 3.05 |
| Msa.3073.1.S1_s_at  | Hypothetical protein                                  | 3.05 |
| Mtr.6755.1.S1_at    | Xanthine dehydrogenase 1                              | 3.05 |
| Mtr.41453.1.S1_at   | Hypothetical protein                                  | 3.04 |

|                     |                                          |      |
|---------------------|------------------------------------------|------|
| Mtr.10204.1.S1_at   | NADH dehydrogenase subunit 4L            | 3.04 |
| Mtr.50869.1.S1_at   | Hypothetical protein                     | 3.04 |
| Mtr.5080.1.S1_s_at  | Extensin (Class I)                       | 3.04 |
| Mtr.9076.1.S1_at    | Hypothetical protein                     | 3.04 |
| Mtr.43853.1.S1_at   | Hypothetical protein                     | 3.04 |
| Mtr.18418.1.S1_at   | Ankyrin                                  | 3.04 |
| Mtr.49055.1.S1_at   | Hypothetical protein                     | 3.04 |
| Mtr.19888.1.S1_at   | Glycosyl hydrolases family 17            | 3.04 |
| Mtr.7491.1.S1_at    | Hypothetical protein                     | 3.04 |
| Mtr.42683.1.S1_at   | Acyl-activating enzyme 18                | 3.03 |
| Mtr.46591.1.S1_at   | Hypothetical protein                     | 3.03 |
| Mtr.12226.1.S1_x_at | Hypothetical protein                     | 3.03 |
| Mtr.11293.1.S1_at   | Polygalacturonase inhibitor-like protein | 3.03 |
| Mtr.39368.1.S1_at   | Ethylene receptor homolog                | 3.03 |
| Mtr.19285.1.S1_s_at | Hypothetical protein                     | 3.03 |
| Mtr.35059.1.S1_at   | Hypothetical protein                     | 3.03 |
| Mtr.44445.1.S1_at   | Syringolide-induced protein B13-1-9      | 3.03 |
| Mtr.10144.1.S1_at   | Disease resistance protein               | 3.03 |
| Mtr.14274.1.S1_at   | RNA-binding region RNP-1                 | 3.03 |
| Mtr.51890.1.S1_s_at | Proteinase inhibitor I9                  | 3.03 |
| Mtr.45295.1.S1_s_at | Hypothetical protein                     | 3.03 |
| Mtr.23763.1.S1_s_at | DEAH box helicase                        | 3.03 |
| Mtr.34681.1.S1_at   | Hypothetical protein                     | 3.03 |
| Mtr.37748.1.S1_at   | Defense-related protein                  | 3.02 |
| Mtr.42794.1.S1_at   | Hypothetical protein                     | 3.02 |
| Mtr.44296.1.S1_at   | Cellulose synthase-like protein D4       | 3.02 |
| Mtr.44925.1.S1_at   | Hypothetical protein                     | 3.02 |
| Mtr.24441.1.S1_s_at | Hypothetical protein                     | 3.02 |
| Mtr.27676.1.S1_at   | Hypothetical protein                     | 3.02 |
| Mtr.25961.1.S1_s_at | Hypothetical protein                     | 3.02 |
| Mtr.7469.1.S1_at    | Hypothetical protein                     | 3.02 |
| Mtr.42273.1.S1_at   | Hypothetical protein                     | 3.02 |
| Mtr.41147.1.S1_at   | Hypothetical protein                     | 3.02 |
| Mtr.37179.1.S1_at   | Hypothetical protein                     | 3.02 |
| Mtr.23037.1.S1_at   | Hypothetical protein                     | 3.01 |
| Mtr.44641.1.S1_at   | F-box family protein                     | 3.01 |
| Mtr.5708.1.S1_at    | RING zinc finger protein                 | 3.01 |
| Mtr.37622.1.S1_at   | KH domain-containing protein             | 3.01 |
| Mtr.11870.1.S1_at   | ER66 protein                             | 3.01 |
| Msa.1300.1.S1_at    | Hypothetical protein                     | 3.01 |
| Mtr.6549.1.S1_at    | Hypothetical protein                     | 3.01 |
| Mtr.45921.1.S1_at   | DNA-directed RNA polymerase              | 3.01 |
| Mtr.35552.1.S1_at   | Hypothetical protein                     | 3.01 |
| Mtr.26606.1.S1_at   | Hypothetical protein                     | 3.01 |
| Mtr.4402.1.S1_x_at  | Hypothetical protein                     | 3.01 |
| Mtr.13557.1.S1_at   | Ethylene receptor homolog                | 3.01 |
| Mtr.27159.1.S1_at   | Hypothetical protein                     | 3.01 |
| Mtr.3548.1.S1_at    | Hypothetical protein                     | 3.01 |
| Mtr.31135.1.S1_at   | Hypothetical protein                     | 3.01 |
| Mtr.12791.1.S1_at   | Hypothetical protein                     | 3.01 |
| Mtr.17167.1.S1_at   | Methyladenine glycosylase                | 3.01 |
| Mtr.20107.1.S1_at   | Expansin                                 | 3.01 |
| Mtr.13267.1.S1_at   | Hypothetical protein                     | 3.00 |
| Mtr.12524.1.S1_at   | Eukaryotic cap-binding protein           | 3.00 |

|                   |                                              |      |
|-------------------|----------------------------------------------|------|
| Mtr.36886.1.S1_at | Hypothetical protein                         | 3.00 |
| Mtr.12455.1.S1_at | Hypothetical protein                         | 3.00 |
| Mtr.12484.1.S1_at | Branched-chain-amino-acid aminotransferase 5 | 3.00 |

**Supplementary Table S4. Downregulated genes at 24 hours after inoculation with soybean rust**

| <b>Probesets</b>    | <b>Target Description</b>                                         | <b>Fold reduction</b> |
|---------------------|-------------------------------------------------------------------|-----------------------|
| Mtr.26465.1.S1_s_at | Phosphoethanolamine N-methyltransferase                           | -865.11               |
| Mtr.13982.1.S1_at   | CDP-diacylglycerol-glycerol-3-phosphate 3-phosphatidyltransferase | -768.01               |
| Mtr.35794.1.S1_s_at | Myo-inositol 2-phosphate synthase                                 | -667.21               |
| Mtr.20438.1.S1_at   | O-methyltransferase                                               | -566.21               |
| Mtr.20321.1.S1_at   | Plant lipid transfer/seed storage/trypsin-alpha amylase inhibitor | -545.29               |
| Mtr.8618.1.S1_at    | Cytochrome P450 monooxygenase CYP93D1                             | -537.70               |
| Mtr.8427.1.S1_at    | Lipoxygenase                                                      | -456.09               |
| Mtr.1186.1.S1_s_at  | Ferric reductase-like transmembrane component family              | -449.36               |
| Mtr.26601.1.S1_s_at | FRO1-like protein                                                 | -434.76               |
| Mtr.42849.1.S1_at   | Myo-inositol-1-phosphate synthase                                 | -390.84               |
| Mtr.26602.1.S1_s_at | NADPH oxidase                                                     | -368.11               |
| Mtr.12069.1.S1_at   | Phosphoethanolamine                                               | -350.54               |
| Mtr.43870.1.S1_at   | FRO1-like protein; NADPH oxidase                                  | -345.88               |
| Mtr.44581.1.S1_at   | Hypothetical protein                                              | -343.94               |
| Msa.2715.1.S1_at    | Hypothetical protein                                              | -315.40               |
| Mtr.44812.1.S1_s_at | Extracellular calcium sensing receptor                            | -311.90               |
| Mtr.13564.1.S1_s_at | Extracellular calcium sensing receptor                            | -294.11               |
| Mtr.42858.1.S1_at   | Hypothetical protein                                              | -286.76               |
| Mtr.10604.1.S1_at   | Nitrate reductase                                                 | -281.26               |
| Mtr.41746.1.S1_at   | DnaJ domain family                                                | -275.74               |
| Mtr.12393.1.S1_at   | Cinnamoyl-CoA reductase-like protein                              | -275.26               |
| Mtr.12682.1.S1_at   | Light-harvesting complex protein                                  | -248.43               |
| Mtr.44591.1.S1_at   | Quinone oxidoreductase                                            | -240.41               |
| Mtr.9320.1.S1_at    | Hypothetical protein                                              | -238.68               |
| Mtr.19547.1.S1_s_at | Nucleoside phosphatase GDA1/CD39                                  | -237.47               |
| Mtr.11284.1.S1_at   | Oxygen evolving complex protein                                   | -233.39               |
| Mtr.10369.1.S1_at   | Chalcone synthase                                                 | -225.35               |
| Mtr.14290.1.S1_at   | Rhodanese-like protein                                            | -224.58               |
| Mtr.10456.1.S1_at   | Early light inducible protein                                     | -222.50               |
| Msa.888.1.S1_at     | Hypothetical protein                                              | -220.26               |
| Mtr.5348.1.S1_at    | Hypothetical protein                                              | -216.22               |
| Mtr.41942.1.S1_at   | Hypothetical protein                                              | -210.45               |
| Mtr.10298.1.S1_at   | Photosystem II 22 kDa protein                                     | -210.25               |
| Mtr.44731.1.S1_at   | Hypothetical protein                                              | -209.63               |
| Msa.1913.1.S1_at    | Hypothetical protein                                              | -192.35               |
| Mtr.41828.1.S1_at   | Thylakoid soluble phosphoprotein                                  | -186.32               |
| Mtr.9873.1.S1_at    | Thioredoxin H2                                                    | -185.89               |
| Mtr.13190.1.S1_at   | Hypothetical protein                                              | -184.82               |
| Mtr.11110.1.S1_at   | GCN5-related N-acetyltransferase (GNAT)                           | -181.75               |
| Mtr.8476.1.S1_at    | Plastidic aldolase                                                | -177.94               |
| Mtr.40245.1.S1_s_at | Early light inducible protein                                     | -172.99               |
| Mtr.49177.1.S1_at   | Dienelactone hydrolase                                            | -171.50               |
| Mtr.10659.1.S1_s_at | Hypothetical protein                                              | -171.49               |
| Mtr.10450.1.S1_at   | Hypothetical protein                                              | -169.63               |
| Msa.3125.1.S1_at    | Hypothetical protein                                              | -169.59               |
| Mtr.46609.1.S1_at   | UDP-glycosyltransferase                                           | -164.63               |
| Mtr.6704.1.S1_at    | Hypothetical protein                                              | -159.30               |
| Mtr.50430.1.S1_at   | Lipoxygenase                                                      | -157.13               |
| Mtr.15442.1.S1_at   | Hypothetical protein                                              | -155.90               |
| Mtr.52215.1.S1_at   | Lipoxygenase                                                      | -155.36               |
| Msa.888.1.S1_s_at   | Hypothetical protein                                              | -154.67               |
| Mtr.40848.1.S1_at   | Photosystem II protein X                                          | -149.55               |

|                     |                                                            |         |
|---------------------|------------------------------------------------------------|---------|
| Mtr.8637.1.S1_at    | Hypothetical protein                                       | -147.41 |
| Mtr.41463.1.S1_at   | ADP-glucose pyrophosphorylase                              | -145.46 |
| Mtr.19547.1.S1_at   | Nucleoside phosphatase GDA1/CD39                           | -145.18 |
| Mtr.35685.1.S1_at   | Heat shock protein                                         | -143.89 |
| Mtr.8475.1.S1_s_at  | Plastidic aldolase                                         | -143.82 |
| Mtr.4439.1.S1_s_at  | Thioredoxin H2                                             | -140.05 |
| Mtr.40742.1.S1_s_at | Thylakoid membrane phosphoprotein 14 kDa                   | -139.95 |
| Mtr.8651.1.S1_a_at  | Dehydrin-like protein                                      | -139.91 |
| Mtr.12272.1.S1_at   | Granule-bound glycogen                                     | -139.18 |
| Mtr.28774.1.S1_at   | Anthocyanidin synthase                                     | -137.01 |
| Mtr.25935.1.S1_at   | Auxin-induced protein 15A                                  | -135.38 |
| Mtr.51205.1.S1_at   | Hypothetical protein                                       | -132.51 |
| Mtr.22257.1.S1_s_at | Hypothetical protein                                       | -131.72 |
| Mtr.34220.1.S1_s_at | Hypothetical protein                                       | -129.88 |
| Mtr.51510.1.S1_at   | Hypothetical protein                                       | -126.43 |
| Mtr.38073.1.S1_at   | Dihydroflavanol-4-reductase 1                              | -126.42 |
| Mtr.38344.1.S1_at   | Limonoid UDP-glucosyltransferase                           | -125.60 |
| Mtr.8651.1.S1_at    | Dehydrin-like protein                                      | -125.37 |
| Msa.3055.1.S1_at    | Hypothetical protein                                       | -125.04 |
| Msa.3134.1.S1_at    | Hypothetical protein                                       | -124.47 |
| Mtr.10457.1.S1_at   | Early light inducible protein                              | -123.42 |
| Mtr.40669.1.S1_at   | FK506 binding protein 1                                    | -123.05 |
| Mtr.42982.1.S1_s_at | Carbonic anhydrase                                         | -121.36 |
| Mtr.26036.1.S1_s_at | 3-ketoacyl-CoA synthase 1 (KCS1)                           | -121.23 |
| Mtr.40719.1.S1_s_at | Tic62 protein                                              | -120.83 |
| Mtr.9735.1.S1_a_at  | Tic62 protein                                              | -119.81 |
| Mtr.25935.1.S1_x_at | Auxin-induced protein 15A                                  | -118.89 |
| Msa.1004.1.S1_at    | Hypothetical protein                                       | -117.08 |
| Mtr.9236.1.S1_at    | ADP-glucose pyrophosphorylase                              | -116.73 |
| Msa.1451.1.S1_at    | Hypothetical protein                                       | -116.24 |
| Mtr.37363.1.S1_at   | CPRD46 protein                                             | -115.96 |
| Msa.3075.1.S1_at    | Hypothetical protein                                       | -114.23 |
| Mtr.10797.1.S1_at   | Thylakoid membrane phosphoprotein 14 kDa                   | -114.10 |
| Mtr.12687.1.S1_at   | Hypothetical protein                                       | -113.52 |
| Mtr.19759.1.S1_at   | Zinc-containing alcohol dehydrogenase                      | -112.15 |
| Mtr.5628.1.S1_s_at  | Lipoxygenase                                               | -111.69 |
| Mtr.32797.1.S1_s_at | Sphingolipid long chain base delta 8 desaturase            | -109.08 |
| Msa.2574.1.S1_at    | Hypothetical protein                                       | -107.23 |
| Mtr.37533.1.S1_at   | Fructose-1,6-bisphosphatase                                | -107.16 |
| Mtr.9564.1.S1_at    | FKBP like protein                                          | -106.44 |
| Mtr.43317.1.S1_s_at | Photosystem II core complex proteins psbY                  | -105.72 |
| Mtr.16402.1.S1_at   | NADPH HC toxin reductase                                   | -105.64 |
| Msa.1690.1.S1_at    | Hypothetical protein                                       | -105.20 |
| Mtr.35240.1.S1_s_at | Xyloglucan endotransglycosylase hydrolase                  | -104.50 |
| Mtr.7343.1.S1_at    | ADP-glucose pyrophosphorylase                              | -104.36 |
| Msa.1383.1.S1_at    | Hypothetical protein                                       | -103.70 |
| Mtr.13242.1.S1_at   | Magnesium chelatase                                        | -103.31 |
| Mtr.12273.1.S1_s_at | Ribulose 1,5-bisphosphate carboxylase small subunit        | -103.16 |
| Msa.2951.1.S1_at    | Hypothetical protein                                       | -102.66 |
| Mtr.37632.1.S1_at   | Tetrapyrrole-binding protein                               | -102.43 |
| Mtr.39986.1.S1_at   | Hypothetical protein                                       | -97.15  |
| Mtr.41786.1.S1_at   | Hypothetical protein                                       | -96.65  |
| Mtr.31194.1.S1_at   | Cytochrome P450                                            | -95.86  |
| Mtr.12160.1.S1_at   | Mitochondrial carnitine/acylcarnitine carrier-like protein | -93.86  |

|                     |                                                       |        |
|---------------------|-------------------------------------------------------|--------|
| Mtr.24578.1.S1_s_at | Hypothetical protein                                  | -93.05 |
| Mtr.38769.1.S1_at   | Steroid 5alpha-reductase                              | -92.25 |
| Mtr.35696.1.S1_s_at | Hypothetical protein                                  | -90.82 |
| Mtr.42842.1.S1_s_at | Ribulose 1,5-bisphosphate carboxylase small subunit   | -90.80 |
| Mtr.43089.1.S1_at   | Seed maturation protein LEA 4                         | -90.57 |
| Mtr.40432.1.S1_at   | Sedoheptulose-1,7-bisphosphatase                      | -89.79 |
| Msa.3155.1.S1_at    | Hypothetical protein                                  | -89.20 |
| Mtr.26465.1.S1_at   | Phosphoethanolamine N-methyltransferase               | -88.57 |
| Mtr.11283.1.S1_at   | Hypothetical protein                                  | -87.53 |
| Mtr.22060.1.S1_at   | Alanine aminotransferase                              | -87.50 |
| Mtr.24034.1.S1_s_at | Hypothetical protein                                  | -87.26 |
| Mtr.6142.1.S1_at    | Jasmonate O-methyltransferase                         | -86.62 |
| Mtr.13375.1.S1_at   | Hypothetical protein                                  | -86.53 |
| Msa.3176.1.S1_at    | Hypothetical protein                                  | -86.50 |
| Mtr.26597.1.S1_at   | Hypothetical protein                                  | -86.11 |
| Mtr.10377.1.S1_at   | Hypothetical protein                                  | -85.81 |
| Mtr.16941.1.S1_at   | UDP-glucuronosyl/UDP-glucosyltransferase              | -85.24 |
| Mtr.40546.1.S1_at   | Hypothetical protein                                  | -84.09 |
| Mtr.44844.1.S1_at   | Chalcone reductase                                    | -83.46 |
| Mtr.8650.1.S1_at    | Xyloglucan endotransglycosylase hydrolase 1           | -83.08 |
| Msa.1197.1.S1_at    | Hypothetical protein                                  | -82.70 |
| Mtr.41445.1.S1_at   | Hypothetical protein                                  | -82.66 |
| Mtr.47151.1.S1_at   | Glutathione S-transferase                             | -81.82 |
| Msa.1381.1.S1_at    | Hypothetical protein                                  | -81.76 |
| Mtr.48649.1.S1_at   | Cellulose synthase                                    | -81.47 |
| Msa.1752.1.S1_s_at  | Hypothetical protein                                  | -79.68 |
| Mtr.37367.1.S1_at   | UDP-glucosyltransferase                               | -79.55 |
| Mtr.35647.1.S1_at   | Hypothetical protein                                  | -79.07 |
| Mtr.33852.1.S1_at   | Hypothetical protein                                  | -78.78 |
| Mtr.9748.1.S1_at    | Peptidyl-prolyl cis-trans isomerase TLP38             | -78.35 |
| Mtr.5621.1.S1_at    | Hypothetical protein                                  | -77.29 |
| Mtr.13564.1.S1_at   | Extracellular calcium sensing receptor                | -76.83 |
| Mtr.37384.1.S1_at   | Granule-bound starch synthase                         | -76.14 |
| Mtr.37215.1.S1_at   | Photosystem II type I chlorophyll a/b-binding protein | -76.07 |
| Mtr.42902.1.S1_s_at | VuP6CS protein                                        | -76.04 |
| Mtr.44991.1.S1_at   | Cucumisn-like serine protease                         | -74.24 |
| Mtr.40861.1.S1_at   | Cytochrome P450                                       | -73.99 |
| Mtr.33459.1.S1_s_at | Hypothetical protein                                  | -73.91 |
| Mtr.41387.1.S1_at   | Hypothetical protein                                  | -73.90 |
| Mtr.4948.1.S1_at    | Hypothetical protein                                  | -73.81 |
| Mtr.4951.1.S1_at    | Hypothetical protein                                  | -73.63 |
| Mtr.37221.1.S1_at   | Photosystem II type I chlorophyll a/b-binding protein | -72.51 |
| Mtr.40497.1.S1_at   | Glucose acyltransferase                               | -72.47 |
| Mtr.50426.1.S1_at   | Lipoxygenase                                          | -72.43 |
| Mtr.32384.1.S1_s_at | Beta-amyrin synthase                                  | -72.07 |
| Mtr.10377.1.S1_s_at | Hypothetical protein                                  | -72.04 |
| Mtr.2065.1.S1_at    | Ent-kaurenoic acid oxidase                            | -71.06 |
| Mtr.41515.1.S1_at   | Phosphate transporter                                 | -70.99 |
| Mtr.37368.1.S1_at   | Hypothetical protein                                  | -70.80 |
| Mtr.6745.1.S1_s_at  | Violaxanthin de-epoxidase                             | -70.10 |
| Msa.1358.1.S1_at    | Hypothetical protein                                  | -69.56 |
| Msa.2589.1.S1_at    | Hypothetical protein                                  | -69.47 |
| Mtr.37362.1.S1_at   | CPRD46 protein                                        | -69.36 |
| Mtr.11545.1.S1_at   | Hypothetical protein                                  | -69.22 |



|                     |                                                       |        |
|---------------------|-------------------------------------------------------|--------|
| Mtr.38772.1.S1_at   | Hypothetical protein                                  | -68.72 |
| Mtr.10948.1.S1_at   | Hypothetical protein                                  | -68.28 |
| Mtr.32302.1.S1_at   | Hypothetical protein                                  | -68.20 |
| Mtr.21070.1.S1_at   | Hypothetical protein                                  | -68.17 |
| Mtr.33633.1.S1_at   | Subtilisin-like serine protease                       | -67.81 |
| Mtr.43442.1.S1_at   | Hypothetical protein                                  | -67.47 |
| Msa.1851.1.S1_at    | Hypothetical protein                                  | -67.29 |
| Mtr.32878.1.S1_at   | Zeaxanthin epoxidase                                  | -66.47 |
| Mtr.37662.1.S1_at   | Proline-rich family protein                           | -66.31 |
| Mtr.42335.1.S1_at   | Hypothetical protein                                  | -65.98 |
| Mtr.10830.1.S1_at   | Solaneyl diphosphate synthase                         | -65.88 |
| Mtr.6707.1.S1_s_at  | Hypothetical protein                                  | -65.25 |
| Mtr.1857.1.S1_at    | Hypothetical protein                                  | -64.99 |
| Mtr.31744.1.S1_at   | Anthranilate N-hydroxycinnamoyl/benzoyltransferase    | -64.85 |
| Mtr.13758.1.S1_at   | Hypothetical protein                                  | -64.43 |
| Msa.3154.1.S1_at    | Hypothetical protein                                  | -64.34 |
| Mtr.2064.1.S1_at    | Hypothetical protein                                  | -64.17 |
| Mtr.43118.1.S1_s_at | Cytochrome P450 72A1                                  | -63.83 |
| Mtr.12722.1.S1_at   | Hypothetical protein                                  | -63.73 |
| Mtr.37252.1.S1_at   | Salt-tolerance protein                                | -63.69 |
| Mtr.44640.1.S1_at   | Hypothetical protein                                  | -63.68 |
| Mtr.2129.1.S1_at    | Hypothetical protein                                  | -63.58 |
| Mtr.44580.1.S1_at   | Hypothetical protein                                  | -63.33 |
| Mtr.46324.1.S1_at   | Hypothetical protein                                  | -62.69 |
| Mtr.8207.1.S1_at    | Hypothetical protein                                  | -62.62 |
| Mtr.43480.1.S1_at   | Hypothetical protein                                  | -62.34 |
| Mtr.48573.1.S1_at   | Haloacid dehalogenase-like hydrolase                  | -61.83 |
| Mtr.36069.1.S1_s_at | Hypothetical protein                                  | -61.68 |
| Mtr.51618.1.S1_at   | Hypothetical protein                                  | -61.19 |
| Mtr.12942.1.S1_at   | Late embryogenesis abundant protein                   | -61.11 |
| Mtr.41042.1.S1_s_at | Phosphoethanolamine N-methyltransferase               | -61.00 |
| Mtr.49244.1.S1_at   | NADPH HC toxin reductase                              | -60.73 |
| Mtr.22013.1.S1_s_at | Peroxiredoxin Q                                       | -60.45 |
| Mtr.18630.1.S1_at   | Prenyltransferase/squalene oxidase                    | -60.35 |
| Mtr.241.1.S1_at     | Delta-6-desaturase                                    | -60.23 |
| Mtr.27898.1.S1_at   | Alanine aminotransferase                              | -60.21 |
| Mtr.46540.1.S1_at   | Hypothetical protein                                  | -59.22 |
| Mtr.11088.1.S1_at   | 37kDa chloroplast inner envelope membrane polypeptide | -58.97 |
| Mtr.6753.1.S1_at    | Hypothetical protein                                  | -58.52 |
| Mtr.39290.1.S1_at   | Hypothetical protein                                  | -57.96 |
| Mtr.22480.1.S1_s_at | Chloroplast mRNA-binding protein CSP41                | -57.81 |
| Mtr.6657.1.S1_s_at  | Hypothetical protein                                  | -57.18 |
| Mtr.9187.1.S1_at    | Hypothetical protein                                  | -57.17 |
| Mtr.11603.1.S1_at   | Non-phototropic hypocotyl-like protein                | -57.11 |
| Mtr.10464.1.S1_at   | Phosphoribulokinase                                   | -57.05 |
| Msa.1578.1.S1_at    | Hypothetical protein                                  | -57.00 |
| Mtr.38920.1.S1_s_at | NFU3 protein                                          | -56.97 |
| Mtr.34115.1.S1_at   | Hypothetical protein                                  | -56.81 |
| Msa.941.1.S1_at     | Hypothetical protein                                  | -56.78 |
| Mtr.49640.1.S1_at   | Hypothetical protein                                  | -56.73 |
| Mtr.17090.1.S1_at   | Myb, DNA-binding                                      | -56.53 |
| Mtr.6756.1.S1_at    | ABC transporter                                       | -56.34 |
| Mtr.14608.1.S1_at   | Heat shock protein Hsp20                              | -55.83 |
| Mtr.43117.1.S1_at   | Cytochrome P450                                       | -55.81 |

|                     |                                                  |        |
|---------------------|--------------------------------------------------|--------|
| Mtr.6748.1.S1_at    | Hypothetical protein                             | -55.47 |
| Mtr.46628.1.S1_s_at | Peroxidase                                       | -55.42 |
| Mtr.6031.1.S1_at    | Lipid transfer protein                           | -55.35 |
| Mtr.23405.1.S1_at   | Hypothetical protein                             | -55.11 |
| Mtr.42830.1.S1_at   | Hypothetical protein                             | -55.11 |
| Mtr.27626.1.S1_s_at | Hypothetical protein                             | -55.05 |
| Mtr.5956.1.S1_s_at  | Late embryogenesis abundant protein              | -54.95 |
| Msa.2805.1.S1_at    | Hypothetical protein                             | -54.61 |
| Msa.565.1.S1_at     | Hypothetical protein                             | -54.42 |
| Mtr.43375.1.S1_at   | Hypothetical protein                             | -54.06 |
| Msa.927.1.S1_at     | Hypothetical protein                             | -53.95 |
| Mtr.20297.1.S1_at   | Lipocalin; Calycin; Violaxanthin de-epoxidase    | -53.59 |
| Mtr.14755.1.S1_at   | Hypothetical protein                             | -53.58 |
| Mtr.18535.1.S1_at   | Hypothetical protein                             | -53.50 |
| Mtr.37297.1.S1_at   | Plastidic aldolase                               | -53.12 |
| Mtr.16620.1.S1_s_at | Phosphoglycerate/bisphosphoglycerate mutase      | -53.11 |
| Mtr.13096.1.S1_at   | Hypothetical protein                             | -52.73 |
| Mtr.41393.1.S1_at   | Hypothetical protein                             | -52.69 |
| Mtr.34955.1.S1_at   | Hypothetical protein                             | -52.68 |
| Mtr.13261.1.S1_s_at | Hypothetical protein                             | -52.64 |
| Msa.2842.1.S1_at    | Hypothetical protein                             | -52.54 |
| Mtr.8438.1.S1_at    | LHCII type I chlorophyll a/b-binding protein     | -52.36 |
| Mtr.18757.1.S1_at   | Sulfate transporter                              | -52.13 |
| Mtr.34428.1.S1_s_at | Glyceraldehyde-3-phosphate dehydrogenase         | -52.12 |
| Mtr.21535.1.S1_at   | Serine/threonine protein kinase                  | -51.92 |
| Mtr.48257.1.S1_at   | Hypothetical protein                             | -51.73 |
| Msa.2885.1.S1_at    | Hypothetical protein                             | -51.71 |
| Mtr.12797.1.S1_at   | Family II lipase EXL3                            | -51.39 |
| Mtr.41843.1.S1_at   | Fimbrin                                          | -51.39 |
| Mtr.8771.1.S1_at    | Hypothetical protein                             | -51.19 |
| Mtr.17317.1.S1_at   | S-adenosyl-methionine-sterol-C-methyltransferase | -50.99 |
| Mtr.42981.1.S1_s_at | Hypothetical protein                             | -50.84 |
| Mtr.24825.1.S1_s_at | Cytochrome P450                                  | -50.43 |
| Mtr.12327.1.S1_s_at | Late embryogenesis abundant protein 1            | -49.89 |
| Mtr.41416.1.S1_at   | Drought-induced protein RDI                      | -49.75 |
| Mtr.31606.1.S1_s_at | Phosphoethanolamine N-methyltransferase          | -49.62 |
| Mtr.27626.1.S1_at   | Hypothetical protein                             | -49.45 |
| Mtr.253.1.S1_at     | Symbiotic ammonium transporter                   | -49.31 |
| Mtr.50844.1.S1_at   | Hypothetical protein                             | -49.27 |
| Mtr.43208.1.S1_at   | Thioredoxin F-type                               | -48.44 |
| Mtr.24540.1.S1_s_at | Peroxidase                                       | -48.44 |
| Mtr.10816.1.S1_at   | Hypothetical protein                             | -48.16 |
| Mtr.44674.1.S1_at   | Phytochrome A supressor spa1                     | -48.00 |
| Mtr.27305.1.S1_at   | S-receptor kinase-like protein 2                 | -47.91 |
| Mtr.42665.1.S1_at   | Hypothetical protein                             | -47.85 |
| Mtr.39853.1.S1_at   | Basic PR-1 protein                               | -47.85 |
| Mtr.45311.1.S1_at   | Hypothetical protein                             | -47.75 |
| Mtr.49641.1.S1_at   | Hypothetical protein                             | -47.69 |
| Mtr.10844.1.S1_at   | Peroxiredoxin Q                                  | -47.69 |
| Mtr.18023.1.S1_at   | Ferredoxin                                       | -47.61 |
| Mtr.41360.1.S1_at   | Fimbrin-like protein                             | -47.24 |
| Mtr.43021.1.S1_at   | 1-deoxy-D-xylulose 5-phosphate reductoisomerase  | -47.20 |
| Mtr.40921.1.S1_at   | Hypothetical protein                             | -47.09 |
| Mtr.51216.1.S1_s_at | Homeodomain-like                                 | -47.03 |

|                     |                                                             |        |
|---------------------|-------------------------------------------------------------|--------|
| Mtr.34690.1.S1_at   | Lactoylglutathione lyase                                    | -46.87 |
| Mtr.50943.1.S1_at   | Peptidase                                                   | -46.32 |
| Mtr.37847.1.S1_at   | UDP-glycosyltransferase 85A8                                | -46.26 |
| Mtr.11069.1.S1_at   | Starch branching enzyme I                                   | -46.23 |
| Mtr.52116.1.S1_at   | Glyceraldehyde 3-phosphate dehydrogenase                    | -46.01 |
| Mtr.33820.1.S1_at   | Beta-galactosidase                                          | -45.92 |
| Mtr.12295.1.S1_at   | Inorganic pyrophosphatase-like protein                      | -45.83 |
| Mtr.24918.1.S1_s_at | Receptor-like protein kinase                                | -45.78 |
| Mtr.13817.1.S1_at   | AX110P-like protein                                         | -45.76 |
| Mtr.51216.1.S1_at   | Homeodomain-like                                            | -45.74 |
| Mtr.10182.1.S1_at   | PREG1-like negative regulator                               | -45.71 |
| Mtr.41816.1.S1_at   | Hypothetical protein                                        | -45.70 |
| Mtr.10124.1.S1_at   | Cytochrome P450                                             | -45.67 |
| Mtr.34723.1.S1_at   | 37 kDa inner envelope membrane protein                      | -45.54 |
| Mtr.13484.1.S1_s_at | Golden2-like protein 2                                      | -45.49 |
| Mtr.39190.1.S1_at   | Cytochrome p450                                             | -45.41 |
| Mtr.10828.1.S1_at   | Glucosyltransferase-13                                      | -45.40 |
| Mtr.8552.1.S1_at    | Hypothetical protein                                        | -45.21 |
| Mtr.42609.1.S1_at   | Hypothetical protein                                        | -45.08 |
| Mtr.43886.1.S1_at   | RNA polymerase sigma subunit SigE                           | -44.95 |
| Mtr.14426.1.S1_at   | Aldo/keto reductase                                         | -44.51 |
| Mtr.47158.1.S1_s_at | Hypothetical protein                                        | -44.29 |
| Mtr.8554.1.S1_at    | Fructose-bisphosphate aldolase                              | -44.07 |
| Mtr.11810.1.S1_at   | Hypothetical protein                                        | -43.99 |
| Mtr.42226.1.S1_at   | Ent-kaurenoic acid oxidase                                  | -43.95 |
| Mtr.18035.1.S1_at   | Protein phosphatase 2C                                      | -43.89 |
| Mtr.43939.1.S1_s_at | Ribonuclease HIII                                           | -43.76 |
| Mtr.33651.1.S1_at   | Hypothetical protein                                        | -43.70 |
| Mtr.8530.1.S1_s_at  | Hypothetical protein                                        | -43.66 |
| Mtr.39964.1.S1_s_at | Hypothetical protein                                        | -43.63 |
| Mtr.14013.1.S1_at   | Transporter associated with antigen processing-like protein | -43.62 |
| Mtr.5594.1.S1_at    | Ca <sup>2+</sup> /H <sup>+</sup> exchanger                  | -43.53 |
| Mtr.7512.1.S1_at    | Hypothetical protein                                        | -43.45 |
| Mtr.49062.1.S1_at   | Heat shock protein DnaJ                                     | -43.19 |
| Mtr.34097.1.S1_at   | Sucrose-phosphate synthase 2                                | -43.06 |
| Mtr.29551.1.S1_at   | Hypothetical protein                                        | -43.05 |
| Mtr.40306.1.S1_at   | Hypothetical protein                                        | -42.74 |
| Mtr.35444.1.S1_at   | Oxygen evolving complex protein                             | -42.17 |
| Mtr.16791.1.S1_s_at | Thylakoid lumen protein                                     | -41.82 |
| Mtr.41715.1.S1_at   | Receptor protein                                            | -41.67 |
| Mtr.42241.1.S1_at   | Nodulin 26-like protein                                     | -41.48 |
| Mtr.32687.1.S1_at   | Hypothetical protein                                        | -41.07 |
| Mtr.20822.1.S1_at   | Hypothetical protein                                        | -40.85 |
| Mtr.37529.1.S1_at   | Magnesium chelatase subunit                                 | -40.84 |
| Mtr.13704.1.S1_at   | Hypothetical protein                                        | -40.66 |
| Mtr.1073.1.S1_at    | Hypothetical protein                                        | -40.52 |
| Mtr.6709.1.S1_at    | Hypothetical protein                                        | -40.50 |
| Msa.935.1.S1_at     | Hypothetical protein                                        | -40.35 |
| Mtr.13324.1.S1_at   | Hypothetical protein                                        | -40.35 |
| Mtr.18560.1.S1_at   | dTDP-glucose 4-6-dehydratase                                | -40.31 |
| Mtr.44648.1.S1_at   | Hypothetical protein                                        | -40.19 |
| Mtr.9354.1.S1_at    | ADP-glucose pyrophosphorylase                               | -40.19 |
| Mtr.25285.1.S1_at   | Symbiotic ammonium transporter                              | -39.68 |
| Mtr.12202.1.S1_at   | Ribulose 1,5-bisphosphate carboxylase small subunit         | -39.47 |

|                     |                                                        |        |
|---------------------|--------------------------------------------------------|--------|
| Mtr.6693.1.S1_s_at  | NFU3 protein                                           | -39.47 |
| Mtr.12028.1.S1_at   | Hypothetical protein                                   | -39.45 |
| Mtr.38403.1.S1_at   | Thylakoid lumenal 25.6 kDa protein                     | -39.26 |
| Mtr.43702.1.S1_s_at | Thylakoid lumenal protein                              | -39.18 |
| Mtr.34856.1.S1_at   | Hypothetical protein                                   | -39.16 |
| Mtr.6744.1.S1_at    | Hypothetical protein                                   | -39.16 |
| Mtr.49762.1.S1_at   | Elongation factor g                                    | -39.00 |
| Mtr.6048.1.S1_s_at  | Hypothetical protein                                   | -39.00 |
| Mtr.26941.1.S1_at   | Hypothetical protein                                   | -38.95 |
| Mtr.10925.1.S1_at   | Hypothetical protein                                   | -38.40 |
| Mtr.38650.1.S1_at   | Anthocyanidin synthase                                 | -38.28 |
| Mtr.17316.1.S1_at   | Generic methyltransferase                              | -38.26 |
| Mtr.6743.1.S1_at    | 2-oxoglutarate/malate translocator                     | -38.07 |
| Mtr.43075.1.S1_at   | Cyanogenic Beta-Glucosidase                            | -38.05 |
| Mtr.7344.1.S1_at    | Hypothetical protein                                   | -37.84 |
| Mtr.8440.1.S1_at    | Salt-tolerance protein                                 | -37.68 |
| Mtr.27621.1.S1_at   | Hypothetical protein                                   | -37.67 |
| Mtr.12965.1.S1_at   | Hypothetical protein                                   | -37.19 |
| Mtr.37624.1.S1_s_at | 3-beta-hydroxysteroiddehydrogenase                     | -36.95 |
| Mtr.32990.1.S1_at   | Non-phototropic hypocotyl-like protein                 | -36.91 |
| Mtr.35200.1.S1_at   | Elongation factor 1 alpha                              | -36.88 |
| Mtr.13203.1.S1_at   | Thylakoid lumenal 29.8 kDa protein                     | -36.82 |
| Mtr.47958.1.S1_at   | Hypothetical protein                                   | -36.63 |
| Mtr.14083.1.S1_at   | Hypothetical protein                                   | -36.51 |
| Mtr.16620.1.S1_at   | Phosphoglycerate/bisphosphoglycerate mutase            | -36.39 |
| Mtr.12949.1.S1_at   | MURF2 protein                                          | -36.33 |
| Mtr.5355.1.S1_at    | Hypothetical protein                                   | -36.29 |
| Msa.1348.1.S1_at    | Hypothetical protein                                   | -36.19 |
| Mtr.13248.1.S1_at   | Protein kinase                                         | -36.15 |
| Mtr.11985.1.S1_at   | Hypothetical protein                                   | -36.13 |
| Msa.1863.1.S1_at    | Hypothetical protein                                   | -36.10 |
| Mtr.10946.1.S1_at   | Hypothetical protein                                   | -36.10 |
| Mtr.43018.1.S1_at   | Cytochrome P450                                        | -36.09 |
| Mtr.4947.1.S1_at    | Hypothetical protein                                   | -35.98 |
| Mtr.37420.1.S1_at   | Glycine cleavage system H protein                      | -35.79 |
| Mtr.30778.1.S1_at   | Hypothetical protein                                   | -35.79 |
| Msa.981.1.S1_at     | Hypothetical protein                                   | -35.70 |
| Mtr.10820.1.S1_at   | Hypothetical protein                                   | -35.66 |
| Mtr.10693.1.S1_at   | Cytochrome P450                                        | -35.66 |
| Msa.2924.1.S1_at    | Hypothetical protein                                   | -35.64 |
| Mtr.2200.1.S1_at    | Hypothetical protein                                   | -35.52 |
| Mtr.19937.1.S1_at   | Elongation factor G                                    | -35.33 |
| Mtr.34850.1.S1_s_at | Hypothetical protein                                   | -35.21 |
| Mtr.40632.1.S1_at   | Hypothetical protein                                   | -35.19 |
| Mtr.11963.1.S1_s_at | Sulphate transporter                                   | -35.11 |
| Mtr.9273.1.S1_at    | Benzoyl coenzyme A: benzyl alcohol benzoyl transferase | -35.10 |
| Mtr.10982.1.S1_at   | Serine/threonine protein kinase                        | -35.09 |
| Mtr.36457.1.S1_at   | RNA polymerase sigma subunit SigE                      | -35.05 |
| Mtr.37609.1.S1_at   | Hypothetical protein                                   | -35.04 |
| Mtr.20763.1.S1_s_at | ATP sulfurylase                                        | -35.03 |
| Mtr.40092.1.S1_at   | Dehydroascorbate reductase                             | -34.99 |
| Mtr.35838.1.S1_at   | Nitrate transporter                                    | -34.83 |
| Mtr.44488.1.S1_at   | Hypothetical protein                                   | -34.55 |
| Mtr.27575.1.S1_at   | Nitrate transporter                                    | -34.52 |

|                     |                                                              |        |
|---------------------|--------------------------------------------------------------|--------|
| Mtr.37557.1.S1_at   | Nine-cis-epoxycarotenoid dioxygenase1                        | -34.41 |
| Mtr.33696.1.S1_at   | 4-coumarate-CoA ligase                                       | -34.38 |
| Msa.1752.1.S1_at    | Hypothetical protein                                         | -34.24 |
| Mtr.17364.1.S1_at   | D-galactoside/L-rhamnose binding SUEL lectin                 | -34.18 |
| Mtr.37623.1.S1_at   | 3-beta-hydroxysteroiddehydrogenase                           | -34.17 |
| Mtr.26473.1.S1_at   | Isoamylase                                                   | -34.01 |
| Mtr.22279.1.S1_at   | Hypothetical protein                                         | -34.00 |
| Mtr.34693.1.S1_at   | Hypothetical protein                                         | -33.99 |
| Mtr.40866.1.S1_at   | Hydrolase-like protein                                       | -33.82 |
| Mtr.47266.1.S1_at   | DNA-binding protein 4                                        | -33.62 |
| Mtr.34490.1.S1_at   | Hypothetical protein                                         | -33.61 |
| Mtr.9780.1.S1_at    | Subtilisin-like protease                                     | -33.60 |
| Mtr.44199.1.S1_at   | Hypothetical protein                                         | -33.56 |
| Msa.2533.1.S1_at    | Hypothetical protein                                         | -33.22 |
| Mtr.12421.1.S1_at   | Hypothetical protein                                         | -33.11 |
| Mtr.40160.1.S1_s_at | Pyroline-5-carboxylate reductase                             | -33.09 |
| Mtr.26044.1.S1_s_at | Circadian clock associated1                                  | -33.08 |
| Mtr.44732.1.S1_at   | GDSL-motif lipase/hydrolase-like protein                     | -33.06 |
| Mtr.20948.1.S1_s_at | Membrane located receptor-like protein                       | -33.01 |
| Mtr.19806.1.S1_at   | Hypothetical protein                                         | -32.79 |
| Msa.1609.1.S1_at    | Hypothetical protein                                         | -32.69 |
| Mtr.39886.1.S1_at   | Hypothetical protein                                         | -32.64 |
| Mtr.4723.1.S1_at    | Hypothetical protein                                         | -32.50 |
| Msa.2939.1.S1_at    | Hypothetical protein                                         | -32.45 |
| Mtr.3123.1.S1_at    | Hypothetical protein                                         | -32.41 |
| Mtr.28829.1.S1_at   | Hypothetical protein                                         | -32.17 |
| Mtr.37839.1.S1_at   | Hypothetical protein                                         | -32.15 |
| Mtr.13595.1.S1_at   | Lecithine cholesterol acyltransferase-like protein           | -32.15 |
| Mtr.12138.1.S1_at   | Hypothetical protein                                         | -32.12 |
| Mtr.10630.1.S1_at   | Nonspecific lipid-transfer protein 2                         | -32.02 |
| Mtr.47629.1.S1_at   | Aldo/keto reductase                                          | -31.90 |
| Mtr.21256.1.S1_at   | Late embryogenesis abundant protein                          | -31.89 |
| Mtr.13606.1.S1_at   | Hypothetical protein                                         | -31.85 |
| Mtr.34779.1.S1_at   | GDSL-motif lipase/hydrolase                                  | -31.82 |
| Mtr.31456.1.S1_at   | FRO1 and FRO2-like protein                                   | -31.64 |
| Mtr.46512.1.S1_at   | Alpha/beta-amyrin synthase                                   | -31.57 |
| Mtr.33577.1.S1_at   | Starch branching enzyme I                                    | -31.54 |
| Mtr.41251.1.S1_at   | Hypothetical protein                                         | -31.46 |
| Msa.1096.1.S1_at    | Hypothetical protein                                         | -31.37 |
| Mtr.8799.1.S1_at    | Raffinose synthase                                           | -31.33 |
| Mtr.6714.1.S1_at    | Hypothetical protein                                         | -31.27 |
| Mtr.43262.1.S1_at   | Hypothetical protein                                         | -31.17 |
| Mtr.24189.1.S1_s_at | Fatty acid desaturase                                        | -31.08 |
| Mtr.41363.1.S1_at   | Immunophilin / FKBP-type peptidyl-prolyl cis-trans isomerase | -31.05 |
| Mtr.40683.1.S1_at   | Photosystem II protein W                                     | -30.93 |
| Mtr.10911.1.S1_at   | Phenylpropanoid:glucosyltransferase 1                        | -30.92 |
| Mtr.10039.1.S1_at   | Hypothetical protein                                         | -30.84 |
| Mtr.21910.1.S1_at   | Trypsin protein inhibitor 2                                  | -30.82 |
| Mtr.24508.1.S1_at   | Hypothetical protein                                         | -30.74 |
| Mtr.38250.1.S1_at   | Hypothetical protein                                         | -30.64 |
| Mtr.51074.1.S1_at   | Inorganic pyrophosphatase                                    | -30.60 |
| Mtr.42339.1.S1_at   | Hypothetical protein                                         | -30.58 |
| Mtr.25313.1.S1_at   | Hypothetical protein                                         | -30.56 |
| Mtr.13434.1.S1_at   | Peroxisomal membrane protein                                 | -30.53 |

|                     |                                                           |        |
|---------------------|-----------------------------------------------------------|--------|
| Mtr.34481.1.S1_at   | Abnormal spindle-like protein                             | -30.52 |
| Mtr.40691.1.S1_at   | Lipoxygenase                                              | -30.40 |
| Mtr.10441.1.S1_at   | mRNA-binding protein                                      | -30.30 |
| Msa.1822.1.S1_at    | Hypothetical protein                                      | -30.28 |
| Mtr.7091.1.S1_at    | Zinc-finger-like protein                                  | -30.22 |
| Mtr.6517.1.S1_at    | Flavonoid 3'-hydroxylase                                  | -30.14 |
| Mtr.773.1.S1_s_at   | LHY protein                                               | -29.95 |
| Mtr.1274.1.S1_at    | Proline-rich protein                                      | -29.94 |
| Mtr.45559.1.S1_at   | Receptor-like serine/threonine protein kinase ARK2        | -29.88 |
| Mtr.40246.1.S1_at   | Hypothetical protein                                      | -29.82 |
| Msa.1854.1.S1_at    | Hypothetical protein                                      | -29.69 |
| Mtr.18614.1.S1_at   | Hypothetical protein                                      | -29.45 |
| Mtr.43911.1.S1_at   | Hypothetical protein                                      | -29.20 |
| Mtr.42854.1.S1_at   | Thioredoxin m                                             | -29.11 |
| Mtr.42567.1.S1_at   | Phantastica transcription factor                          | -28.98 |
| Mtr.1392.1.S1_s_at  | Hypothetical protein                                      | -28.98 |
| Mtr.4580.1.S1_at    | ABC transporter                                           | -28.89 |
| Mtr.11477.1.S1_at   | PsbP protein                                              | -28.74 |
| Msa.1239.1.S1_at    | Hypothetical protein                                      | -28.65 |
| Mtr.43628.1.S1_at   | Isoflavonoid glucosyltransferase                          | -28.62 |
| Mtr.21257.1.S1_at   | Late embryogenesis abundant protein                       | -28.62 |
| Mtr.42261.1.S1_at   | Rubisco activase                                          | -28.59 |
| Mtr.9248.1.S1_at    | Hypothetical protein                                      | -28.53 |
| Mtr.25652.1.S1_at   | Cell-wall P4 protein                                      | -28.49 |
| Mtr.48150.1.S1_s_at | Hypothetical protein                                      | -28.46 |
| Mtr.37883.1.S1_at   | Hypothetical protein                                      | -28.31 |
| Mtr.28616.1.S1_at   | ABC transporter                                           | -28.29 |
| Mtr.41693.1.S1_at   | CND41, chloroplast nucleoid DNA binding protein           | -28.13 |
| Mtr.12300.1.S1_at   | Aminotransferase 2                                        | -28.10 |
| Mtr.50943.1.S1_s_at | Peptidase                                                 | -28.00 |
| Mtr.41305.1.S1_at   | CPRD49 protein                                            | -28.00 |
| Mtr.34717.1.S1_at   | Disease resistance response protein                       | -27.97 |
| Mtr.12445.1.S1_at   | Hypothetical protein                                      | -27.92 |
| Mtr.31205.1.S1_at   | Hypothetical protein                                      | -27.91 |
| Msa.1384.1.S1_at    | Hypothetical protein                                      | -27.88 |
| Mtr.40620.1.S1_at   | Hypothetical protein                                      | -27.78 |
| Mtr.8773.1.S1_s_at  | Poly(A) polymerase                                        | -27.78 |
| Mtr.8977.1.S1_at    | Pathogenesis-related protein 1                            | -27.66 |
| Mtr.11524.1.S1_at   | Hypothetical protein                                      | -27.53 |
| Mtr.40994.1.S1_at   | ABC transporter                                           | -27.45 |
| Mtr.32213.1.S1_at   | Nitrite transpor                                          | -27.43 |
| Mtr.51080.1.S1_at   | Phospholipid/glycerol acyltransferase                     | -27.40 |
| Mtr.42446.1.S1_at   | Nitrate reductase                                         | -27.37 |
| Mtr.32479.1.S1_at   | Phosphoribosylaminoimidazolecarboxamide formyltransferase | -27.34 |
| Msa.1550.1.S1_at    | Hypothetical protein                                      | -27.27 |
| Mtr.41275.1.S1_at   | Kinesin-like protein                                      | -27.24 |
| Mtr.9185.1.S1_at    | Prephenate dehydratase                                    | -27.18 |
| Mtr.45729.1.S1_s_at | Hypothetical protein                                      | -27.16 |
| Msa.2685.1.S1_at    | Hypothetical protein                                      | -27.11 |
| Mtr.43589.1.S1_at   | Protease Do-like 1                                        | -27.10 |
| Mtr.48146.1.S1_s_at | Boron transporter                                         | -27.04 |
| Mtr.34852.1.S1_at   | Raucaffricine-O-beta-D-glucosidase                        | -26.96 |
| Mtr.33459.1.S1_at   | Hypothetical protein                                      | -26.86 |
| Mtr.2101.1.S1_at    | Hypothetical protein                                      | -26.68 |

|                     |                                                     |        |
|---------------------|-----------------------------------------------------|--------|
| Mtr.12736.1.S1_at   | Hypothetical protein                                | -26.52 |
| Mtr.36871.1.S1_at   | Calcium-dependent protein kinase                    | -26.51 |
| Mtr.47901.1.S1_x_at | Glyceraldehyde-3-phosphate dehydrogenase            | -26.51 |
| Mtr.3423.1.S1_at    | Vesicular glutamate transporter-3                   | -26.49 |
| Mtr.44988.1.S1_at   | Zeaxanthin epoxidase                                | -26.49 |
| Mtr.21054.1.S1_at   | Mitochondrial transcription termination factor      | -26.47 |
| Mtr.45397.1.S1_at   | Ankyrin repeat-like protein                         | -26.42 |
| Mtr.16410.1.S1_at   | Epoxide hydrolase                                   | -26.28 |
| Mtr.24085.1.S1_at   | Hypothetical protein                                | -26.25 |
| Mtr.41447.1.S1_at   | Hypothetical protein                                | -26.24 |
| Mtr.25633.1.S1_at   | 2-Cys peroxiredoxin                                 | -26.23 |
| Mtr.43701.1.S1_at   | Thylakoid lumenal protein                           | -26.23 |
| Mtr.39747.1.S1_at   | UDP-glucose:flavonoid 3-O-glucosyltransferase       | -26.21 |
| Mtr.12720.1.S1_at   | Lipoxygenase                                        | -26.16 |
| Mtr.33008.1.S1_at   | Hypothetical protein                                | -26.02 |
| Mtr.43727.1.S1_s_at | Squalene monooxygenase 1                            | -26.02 |
| Mtr.7842.1.S1_at    | Hypothetical protein                                | -26.01 |
| Mtr.41722.1.S1_at   | Hypothetical protein                                | -25.96 |
| Mtr.44475.1.S1_at   | Ultraviolet-B-repressible protein                   | -25.83 |
| Mtr.11888.1.S1_at   | Aldehyde dehydrogenase                              | -25.82 |
| Mtr.37609.1.S1_s_at | Hypothetical protein                                | -25.80 |
| Mtr.14762.1.S1_at   | Flavoprotein monooxygenase                          | -25.68 |
| Mtr.50758.1.S1_at   | Rubredoxin-type Fe(Cys) <sub>4</sub> protein        | -25.61 |
| Msa.928.1.S1_at     | Hypothetical protein                                | -25.56 |
| Mtr.36842.1.S1_s_at | Nodulin 26-like protein                             | -25.51 |
| Mtr.13567.1.S1_at   | Hypothetical protein                                | -25.50 |
| Msa.1363.1.S1_at    | Hypothetical protein                                | -25.49 |
| Mtr.42735.1.S1_at   | Hypothetical protein                                | -25.47 |
| Mtr.45292.1.S1_at   | Hypothetical protein                                | -25.45 |
| Mtr.14782.1.S1_at   | 2OG-Fe(II) oxygenase                                | -25.29 |
| Mtr.12063.1.S1_at   | Hypothetical protein                                | -25.03 |
| Mtr.51399.1.S1_at   | Hypothetical protein                                | -25.00 |
| Mtr.33632.1.S1_s_at | Hypothetical protein                                | -24.98 |
| Mtr.10972.1.S1_at   | Hypothetical protein                                | -24.88 |
| Msa.1838.1.S1_s_at  | Hypothetical protein                                | -24.75 |
| Mtr.21416.1.S1_at   | Ribonuclease T2                                     | -24.66 |
| Mtr.10927.1.S1_at   | Regulator of chromosome condensation-like protein   | -24.66 |
| Mtr.11236.1.S1_at   | UDP-glucosyltransferase                             | -24.65 |
| Mtr.33659.1.S1_at   | Hypothetical protein                                | -24.61 |
| Msa.1593.1.S1_at    | Hypothetical protein                                | -24.60 |
| Mtr.39712.1.S1_at   | Rac GTPase activating protein 3                     | -24.53 |
| Mtr.48892.1.S1_at   | Hypothetical protein                                | -24.51 |
| Mtr.27854.1.S1_at   | NADP-dependent oxidoreductase P1                    | -24.46 |
| Mtr.38370.1.S1_s_at | Hypothetical protein                                | -24.43 |
| Mtr.10289.1.S1_at   | SANT/MYB domain protein                             | -24.40 |
| Mtr.12026.1.S1_at   | Hypothetical protein                                | -24.36 |
| Mtr.47901.1.S1_at   | Glyceraldehyde-3-phosphate dehydrogenase            | -24.36 |
| Mtr.42925.1.S1_s_at | Ribulose biphosphate carboxylase/oxygenase activase | -24.32 |
| Mtr.13393.1.S1_at   | Hypothetical protein                                | -24.20 |
| Msa.3042.1.S1_s_at  | Hypothetical protein                                | -24.16 |
| Mtr.38722.1.S1_at   | Hypothetical protein                                | -24.11 |
| Mtr.39425.1.S1_s_at | ATP-sulfurylase                                     | -23.94 |
| Mtr.36333.1.S1_at   | Flavonoid 3'-hydroxylase                            | -23.89 |
| Mtr.9624.1.S1_at    | ABC transporter                                     | -23.82 |

|                     |                                                    |        |
|---------------------|----------------------------------------------------|--------|
| Msa.1549.1.S1_at    | Hypothetical protein                               | -23.80 |
| Mtr.42112.1.S1_at   | Hypothetical protein                               | -23.79 |
| Mtr.5633.1.S1_at    | Esterase/lipase/thioesterase                       | -23.77 |
| Mtr.46159.1.S1_at   | bZIP transcription factor                          | -23.71 |
| Mtr.1431.1.S1_at    | Hypothetical protein                               | -23.62 |
| Mtr.43350.1.S1_at   | Hypothetical protein                               | -23.49 |
| Mtr.10952.1.S1_at   | Sulfate adenylyltransferase                        | -23.49 |
| Mtr.43627.1.S1_at   | Hypothetical protein                               | -23.40 |
| Mtr.36690.1.S1_at   | GH3-like protein                                   | -23.39 |
| Mtr.44534.1.S1_at   | Hypothetical protein                               | -23.38 |
| Mtr.2073.1.S1_at    | Copper/topa quinone amine oxidase                  | -23.37 |
| Msa.3048.1.S1_at    | Hypothetical protein                               | -23.31 |
| Mtr.10857.1.S1_at   | MOLYBDENUM COFACTOR BIOSYNTHESIS PROTEIN C         | -23.17 |
| Mtr.10593.1.S1_at   | Allene oxide cyclase                               | -23.13 |
| Mtr.42369.1.S1_at   | Hypothetical protein                               | -23.09 |
| Mtr.49256.1.S1_at   | Hypothetical protein                               | -23.07 |
| Mtr.43295.1.S1_at   | Hypothetical protein                               | -23.02 |
| Mtr.22603.1.S1_at   | Glyceraldehyde-3-phosphate dehydrogenase A         | -22.93 |
| Mtr.13996.1.S1_at   | Hypothetical protein                               | -22.92 |
| Mtr.12493.1.S1_at   | Hypothetical protein                               | -22.88 |
| Mtr.28243.1.S1_at   | Hypothetical protein                               | -22.85 |
| Mtr.14906.1.S1_at   | Major intrinsic protein                            | -22.82 |
| Mtr.43683.1.S1_at   | Protein phosphatase 2C                             | -22.82 |
| Mtr.38087.1.S1_at   | Hyoscyamine 6 beta-hydroxylase                     | -22.72 |
| Mtr.33723.1.S1_at   | Hypothetical protein                               | -22.66 |
| Mtr.37042.1.S1_at   | Hypothetical protein                               | -22.64 |
| Msa.3133.1.S1_at    | Hypothetical protein                               | -22.60 |
| Mtr.45551.1.S1_at   | Hypothetical protein                               | -22.58 |
| Mtr.11326.1.S1_at   | Leaf senescence protein                            | -22.46 |
| Mtr.12258.1.S1_at   | Nonspecific lipid-transfer protein precursor (LTP) | -22.45 |
| Mtr.29089.1.S1_s_at | Peroxidase                                         | -22.45 |
| Mtr.10881.1.S1_at   | Hypothetical protein                               | -22.42 |
| Mtr.48925.1.S1_at   | Hypothetical protein                               | -22.42 |
| Mtr.48595.1.S1_at   | Hypothetical protein                               | -22.38 |
| Mtr.15717.1.S1_at   | Chlorophyll A-B binding protein                    | -22.35 |
| Mtr.12842.1.S1_at   | Hypothetical protein                               | -22.33 |
| Mtr.20116.1.S1_s_at | Hypothetical protein                               | -22.31 |
| Mtr.5369.1.S1_at    | Nitrate transporter                                | -22.31 |
| Mtr.37808.1.S1_at   | Hypothetical protein                               | -22.27 |
| Msa.1787.1.S1_at    | Hypothetical protein                               | -22.27 |
| Mtr.12056.1.S1_s_at | Cytochrome P450                                    | -22.25 |
| Mtr.33019.1.S1_at   | Hypothetical protein                               | -22.25 |
| Mtr.45032.1.S1_at   | Squalene epoxidase                                 | -22.24 |
| Mtr.14112.1.S1_s_at | PAP fibrillin                                      | -22.13 |
| Mtr.37286.1.S1_at   | Furostanol glycoside 26-O-beta-glucosidase         | -22.08 |
| Mtr.43994.1.S1_at   | Hypothetical protein                               | -22.06 |
| Mtr.34625.1.S1_at   | Cytochrome P450 71A6                               | -21.98 |
| Mtr.24823.1.S1_at   | Hypothetical protein                               | -21.95 |
| Mtr.31754.1.S1_at   | Isoflavonoid glucosyltransferase                   | -21.92 |
| Mtr.12499.1.S1_s_at | Hypothetical protein                               | -21.90 |
| Mtr.41070.1.S1_at   | Hypothetical protein                               | -21.79 |
| Mtr.39524.1.S1_at   | Circadian clock associated1                        | -21.55 |
| Mtr.33666.1.S1_at   | Hypothetical protein                               | -21.47 |
| Mtr.33061.1.S1_at   | Hypothetical protein                               | -21.40 |



|                     |                                                                        |        |
|---------------------|------------------------------------------------------------------------|--------|
| Msa.1743.1.S1_at    | Hypothetical protein                                                   | -21.36 |
| Mtr.12414.1.S1_at   | Apospory-associated protein C                                          | -21.35 |
| Mtr.25367.1.S1_at   | 12-oxophytodienoic acid 10, 11-reductase                               | -21.34 |
| Mtr.27471.1.S1_s_at | Reversibly glycosylated protein                                        | -21.34 |
| Mtr.43296.1.S1_at   | Hypothetical protein                                                   | -21.32 |
| Mtr.20943.1.S1_at   | Serine/threonine protein kinase                                        | -21.31 |
| Mtr.5804.1.S1_at    | Hypothetical protein                                                   | -21.30 |
| Mtr.32752.1.S1_s_at | Hypothetical protein                                                   | -21.29 |
| Mtr.40149.1.S1_at   | Thiazole biosynthetic enzyme                                           | -21.28 |
| Mtr.36794.1.S1_at   | Hypothetical protein                                                   | -21.27 |
| Mtr.22141.1.S1_at   | Gycosyltransferase                                                     | -21.24 |
| Mtr.34140.1.S1_at   | CpABA1 protein                                                         | -21.16 |
| Mtr.250.1.S1_at     | Hypothetical protein                                                   | -21.15 |
| Mtr.9477.1.S1_at    | Hypothetical protein                                                   | -21.13 |
| Mtr.31791.1.S1_at   | Hypothetical protein                                                   | -21.07 |
| Mtr.45376.1.S1_at   | Nitrite transporter                                                    | -21.04 |
| Mtr.13968.1.S1_at   | GH3-like protein                                                       | -21.01 |
| Mtr.18105.1.S1_at   | Phosphoglycerate kinase                                                | -20.98 |
| Mtr.51059.1.S1_x_at | Cytochrome P450                                                        | -20.97 |
| Mtr.6752.1.S1_at    | 10 kDa photosystem II polypeptide                                      | -20.89 |
| Mtr.4339.1.S1_at    | Hypothetical protein                                                   | -20.87 |
| Mtr.11921.1.S1_at   | Thylakoid lumen protein                                                | -20.83 |
| Mtr.2703.1.S1_at    | Hypothetical protein                                                   | -20.78 |
| Mtr.40788.1.S1_at   | Hypothetical protein                                                   | -20.77 |
| Mtr.39821.1.S1_at   | Hypothetical protein                                                   | -20.70 |
| Mtr.49839.1.S1_x_at | Hypothetical protein                                                   | -20.66 |
| Mtr.17318.1.S1_at   | Magnesium-protoporphyrin IX monomethyl ester aerobic oxidative cyclase | -20.65 |
| Mtr.6059.1.S1_at    | bHLH protein                                                           | -20.63 |
| Mtr.32922.1.S1_at   | Amino acid transporter                                                 | -20.62 |
| Mtr.20397.1.S1_at   | Amidase, hydantoinase/carbamoylase                                     | -20.59 |
| Mtr.12374.1.S1_at   | Protochlorophyllide reductase                                          | -20.51 |
| Mtr.14435.1.S1_at   | Calcium-binding EF-hand protein                                        | -20.50 |
| Mtr.37731.1.S1_at   | PWWP domain protein                                                    | -20.45 |
| Mtr.37245.1.S1_at   | Chlorophyll a-b binding protein 215                                    | -20.38 |
| Mtr.40249.1.S1_at   | ATP synthase delta chain                                               | -20.37 |
| Mtr.42596.1.S1_at   | LLS1-like protein                                                      | -20.34 |
| Mtr.45179.1.S1_at   | Malate dehydrogenase                                                   | -20.33 |
| Mtr.5960.1.S1_s_at  | Hypothetical protein                                                   | -20.31 |
| Mtr.44505.1.S1_at   | Glucosyltransferase-9                                                  | -20.30 |
| Mtr.45678.1.S1_at   | Hypothetical protein                                                   | -20.28 |
| Mtr.32351.1.S1_s_at | Hypothetical protein                                                   | -20.28 |
| Mtr.12964.1.S1_at   | Hypothetical protein                                                   | -20.25 |
| Mtr.13080.1.S1_at   | Hypothetical protein                                                   | -20.22 |
| Mtr.49764.1.S1_at   | Auxin Efflux Carrier                                                   | -20.20 |
| Mtr.32865.1.S1_at   | Hypothetical protein                                                   | -20.17 |
| Mtr.10013.1.S1_at   | Hypothetical protein                                                   | -20.15 |
| Mtr.13356.1.S1_at   | Allene oxide cyclase C4                                                | -20.12 |
| Mtr.21614.1.S1_at   | Hypothetical protein                                                   | -20.11 |
| Mtr.37228.1.S1_at   | UDP-glycose:flavonoid glycosyltransferase                              | -20.08 |
| Mtr.4029.1.S1_at    | CTF2A                                                                  | -20.03 |
| Mtr.13592.1.S1_at   | Photomorphogenesis repressor protein                                   | -20.02 |
| Mtr.19622.1.S1_s_at | Hypothetical protein                                                   | -20.02 |
| Mtr.52053.1.S1_at   | Ribosomal protein L35                                                  | -19.98 |
| Msa.3166.1.S1_at    | Hypothetical protein                                                   | -19.96 |

|                     |                                                   |        |
|---------------------|---------------------------------------------------|--------|
| Mtr.2675.1.S1_s_at  | Transporter-like protein                          | -19.95 |
| Mtr.12900.1.S1_at   | Iron reductase                                    | -19.93 |
| Mtr.21616.1.S1_at   | Hypothetical protein                              | -19.89 |
| Msa.1297.1.S1_at    | Hypothetical protein                              | -19.82 |
| Mtr.41759.1.S1_at   | Rac GTPase activating protein                     | -19.80 |
| Msa.3003.1.S1_at    | Hypothetical protein                              | -19.79 |
| Mtr.40587.1.S1_at   | Glyoxalase family protein                         | -19.76 |
| Mtr.42178.1.S1_at   | Starch synthase I                                 | -19.72 |
| Mtr.22814.1.S1_at   | Hypothetical protein                              | -19.70 |
| Mtr.41106.1.S1_at   | Hypothetical protein                              | -19.65 |
| Mtr.11085.1.S1_at   | LHY protein                                       | -19.60 |
| Mtr.2893.1.S1_at    | Hypothetical protein                              | -19.54 |
| Mtr.31792.1.S1_at   | Hypothetical protein                              | -19.54 |
| Mtr.8772.1.S1_at    | Poly(A) polymerase                                | -19.50 |
| Mtr.18406.1.S1_at   | Hypothetical protein                              | -19.42 |
| Mtr.43335.1.S1_at   | 4-coumarate:coenzyme A ligase                     | -19.40 |
| Mtr.43709.1.S1_at   | Starch synthase isoform SS III                    | -19.40 |
| Mtr.43899.1.S1_at   | Hydrolase                                         | -19.39 |
| Mtr.8133.1.S1_at    | Hypothetical protein                              | -19.38 |
| Mtr.11048.1.S1_at   | Hypothetical protein                              | -19.34 |
| Msa.3147.1.S1_at    | Hypothetical protein                              | -19.29 |
| Mtr.45379.1.S1_at   | Hypothetical protein                              | -19.22 |
| Mtr.6869.1.S1_s_at  | Glutamate receptor 3.6                            | -19.21 |
| Mtr.25331.1.S1_at   | Glutamate receptor 3.6                            | -19.18 |
| Msa.1688.1.S1_at    | Hypothetical protein                              | -19.15 |
| Mtr.27388.1.S1_s_at | Rubisco activase                                  | -19.11 |
| Mtr.43610.1.S1_at   | Hypothetical protein                              | -19.10 |
| Msa.1086.1.S1_at    | Hypothetical protein                              | -19.09 |
| Mtr.27132.1.S1_s_at | Histidine-containing phosphotransfer protein      | -19.09 |
| Mtr.38869.1.S1_at   | Hypothetical protein                              | -19.08 |
| Mtr.38366.1.S1_at   | Hypothetical protein                              | -19.03 |
| Mtr.40236.1.S1_s_at | Hypothetical protein                              | -19.02 |
| Mtr.43181.1.S1_at   | Thiamine biosynthesis protein thiC                | -19.00 |
| Mtr.12236.1.S1_at   | Bundle sheath defective protein 2                 | -18.89 |
| Mtr.41265.1.S1_at   | Glutathione S-transferase GST 10                  | -18.79 |
| Mtr.9137.1.S1_at    | Hypothetical protein                              | -18.79 |
| Mtr.12060.1.S1_at   | Annexin                                           | -18.77 |
| Mtr.52315.1.S1_at   | Heat shock protein DnaJ                           | -18.75 |
| Mtr.43381.1.S1_at   | Hypothetical protein                              | -18.72 |
| Mtr.44975.1.S1_at   | ABC transporter                                   | -18.66 |
| Mtr.40981.1.S1_at   | Cellulose synthase                                | -18.66 |
| Mtr.35826.1.S1_at   | Hypothetical protein                              | -18.64 |
| Mtr.29595.1.S1_at   | Hypothetical protein                              | -18.64 |
| Mtr.28742.1.S1_at   | Very-long-chain fatty acid condensing enzyme CUT1 | -18.64 |
| Mtr.22140.1.S1_at   | Glycosyltransferase                               | -18.63 |
| Msa.2771.1.S1_at    | Hypothetical protein                              | -18.61 |
| Mtr.9416.1.S1_at    | Protease sppA                                     | -18.57 |
| Mtr.31754.1.S1_x_at | Isoflavonoid glucosyltransferase                  | -18.57 |
| Msa.1732.1.S1_at    | Hypothetical protein                              | -18.54 |
| Msa.2424.1.S1_at    | Hypothetical protein                              | -18.51 |
| Mtr.27878.1.S1_at   | Isoflavone reductase                              | -18.50 |
| Mtr.9467.1.S1_at    | Glutaredoxin                                      | -18.49 |
| Mtr.39011.1.S1_at   | Auxin-binding protein ABP19b                      | -18.44 |
| Mtr.7468.1.S1_at    | 10 kDa photosystem II polypeptide                 | -18.40 |

|                     |                                                 |        |
|---------------------|-------------------------------------------------|--------|
| Mtr.40162.1.S1_at   | Reversibly glycosylated protein                 | -18.32 |
| Msa.1910.1.S1_at    | Hypothetical protein                            | -18.28 |
| Msa.1254.1.S1_at    | Hypothetical protein                            | -18.28 |
| Mtr.14011.1.S1_at   | Hypothetical protein                            | -18.26 |
| Msa.2800.1.S1_at    | Hypothetical protein                            | -18.25 |
| Mtr.928.1.S1_at     | Hypothetical protein                            | -18.23 |
| Mtr.44339.1.S1_at   | Hypothetical protein                            | -18.21 |
| Mtr.44611.1.S1_at   | Hypothetical protein                            | -18.19 |
| Mtr.47158.1.S1_at   | Hypothetical protein                            | -18.14 |
| Mtr.46292.1.S1_at   | Malate dehydrogenase                            | -18.11 |
| Mtr.34703.1.S1_at   | Hypothetical protein                            | -18.09 |
| Msa.1858.1.S1_x_at  | Hypothetical protein                            | -18.03 |
| Mtr.32336.1.S1_at   | Cytochrome P450 71A21                           | -18.00 |
| Mtr.14592.1.S1_at   | Peroxidase                                      | -17.98 |
| Mtr.43197.1.S1_at   | Hypothetical protein                            | -17.96 |
| Mtr.34178.1.S1_s_at | Hypothetical protein                            | -17.90 |
| Mtr.40761.1.S1_at   | 50S ribosomal protein L11                       | -17.90 |
| Mtr.12821.1.S1_s_at | Phosphoglucomutase                              | -17.89 |
| Mtr.32679.1.S1_at   | Hypothetical protein                            | -17.87 |
| Mtr.40814.1.S1_at   | G4 protein (Chlorophyll synthetase)             | -17.86 |
| Mtr.41960.1.S1_at   | Hypothetical protein                            | -17.85 |
| Mtr.27827.1.S1_at   | Hypothetical protein                            | -17.85 |
| Mtr.12305.1.S1_at   | Chlorophyll a/b-binding protein CP24            | -17.85 |
| Mtr.6039.1.S1_at    | Hypothetical protein                            | -17.82 |
| Mtr.31215.1.S1_s_at | Hypothetical protein                            | -17.81 |
| Mtr.47283.1.S1_at   | Hypothetical protein                            | -17.81 |
| Mtr.1617.1.S1_s_at  | Basic blue copper protein                       | -17.77 |
| Mtr.9402.1.S1_at    | Aldehyde dehydrogenase                          | -17.75 |
| Mtr.43174.1.S1_at   | Germin-like protein                             | -17.73 |
| Mtr.20298.1.S1_at   | Hypothetical protein                            | -17.64 |
| Mtr.20201.1.S1_at   | Na <sup>+</sup> /H <sup>+</sup> antiporter      | -17.63 |
| Mtr.31606.1.S1_at   | Phosphoethanolamine N-methyltransferase         | -17.63 |
| Mtr.25945.1.S1_at   | Myb-related                                     | -17.62 |
| Mtr.5305.1.S1_at    | Cytochrome P450                                 | -17.61 |
| Mtr.5368.1.S1_at    | Chlorophyll a/b-binding protein                 | -17.60 |
| Mtr.3942.1.S1_at    | Hypothetical protein                            | -17.59 |
| Mtr.25013.1.S1_at   | 2'-hydroxy isoflavone/dihydroflavonol reductase | -17.54 |
| Mtr.20149.1.S1_at   | Hypothetical protein                            | -17.49 |
| Mtr.39235.1.S1_at   | Hypothetical protein                            | -17.44 |
| Mtr.27885.1.S1_s_at | Hypothetical protein                            | -17.43 |
| Mtr.20226.1.S1_at   | UDP-glucuronosyl/UDP-glucosyltransferase        | -17.43 |
| Mtr.50516.1.S1_at   | Deoxyribodipyrimidine photolyase                | -17.43 |
| Mtr.37345.1.S1_at   | Subtilisin-like protease                        | -17.40 |
| Mtr.40597.1.S1_at   | Seed maturation protein PM39                    | -17.38 |
| Mtr.2477.1.S1_at    | Hypothetical protein                            | -17.29 |
| Mtr.38712.1.S1_at   | Hypothetical protein                            | -17.28 |
| Msa.1916.1.S1_at    | Hypothetical protein                            | -17.27 |
| Mtr.40734.1.S1_at   | Glucosyltransferase-14                          | -17.26 |
| Mtr.47857.1.S1_at   | 1,4-alpha-D-glucan maltohydrolase               | -17.24 |
| Mtr.39379.1.S1_at   | Amino acid permease 6                           | -17.21 |
| Mtr.20033.1.S1_at   | Hypothetical protein                            | -17.21 |
| Mtr.6141.1.S1_s_at  | Alpha-expansin                                  | -17.20 |
| Mtr.51345.1.S1_at   | Hypothetical protein                            | -17.16 |
| Mtr.28584.1.S1_s_at | Hypothetical protein                            | -17.13 |

|                     |                                           |        |
|---------------------|-------------------------------------------|--------|
| Mtr.13959.1.S1_at   | SHOOT1 protein                            | -17.13 |
| Msa.1805.1.S1_at    | Hypothetical protein                      | -17.10 |
| Mtr.5468.1.S1_at    | Hypothetical protein                      | -17.08 |
| Mtr.8418.1.S1_s_at  | Xylulose kinase                           | -17.07 |
| Msa.1858.1.S1_at    | Hypothetical protein                      | -17.04 |
| Mtr.46511.1.S1_at   | Alpha/beta-amyrin synthase                | -17.03 |
| Mtr.38923.1.S1_at   | Cytoplasmic intermediate filament protein | -17.02 |
| Mtr.26958.1.S1_at   | Hypothetical protein                      | -17.01 |
| Mtr.37608.1.S1_at   | Hypothetical protein                      | -16.95 |
| Mtr.9257.1.S1_at    | Starch synthase I                         | -16.93 |
| Mtr.41132.1.S1_at   | Hypothetical protein                      | -16.81 |
| Mtr.41919.1.S1_s_at | Hypothetical protein                      | -16.80 |
| Msa.1760.1.S1_at    | Hypothetical protein                      | -16.80 |
| Mtr.20386.1.S1_s_at | D-tyrosyl-tRNA(Tyr) deacylase             | -16.74 |
| Mtr.13143.1.S1_at   | Starch synthase isoform SS III            | -16.72 |
| Mtr.7544.1.S1_at    | Isoflavonoid glucosyltransferase          | -16.71 |
| Msa.960.1.S1_at     | Hypothetical protein                      | -16.69 |
| Mtr.9205.1.S1_at    | Hypothetical protein                      | -16.68 |
| Mtr.40926.1.S1_at   | Thioredoxin-like protein                  | -16.67 |
| Mtr.2712.1.S1_at    | Cyclin delta-3                            | -16.65 |
| Mtr.10992.1.S1_at   | Arabinogalactan protein                   | -16.65 |
| Mtr.40558.1.S1_at   | Short-chain alcohol dehydrogenase         | -16.63 |
| Mtr.27410.1.S1_at   | Hypothetical protein                      | -16.60 |
| Mtr.5490.1.S1_at    | Hypothetical protein                      | -16.59 |
| Mtr.41859.1.S1_at   | FRO1 and FRO2-like protein                | -16.54 |
| Mtr.39251.1.S1_at   | Translation initiation factor IF-2        | -16.51 |
| Mtr.44109.1.S1_at   | Nitrate transporter                       | -16.51 |
| Mtr.44533.1.S1_at   | Hypothetical protein                      | -16.47 |
| Mtr.30958.1.S1_at   | Hypothetical protein                      | -16.45 |
| Mtr.40755.1.S1_at   | ERD7 protein                              | -16.40 |
| Msa.2888.1.S1_at    | Hypothetical protein                      | -16.35 |
| Mtr.10840.1.S1_at   | Hypothetical protein                      | -16.35 |
| Mtr.5741.1.S1_s_at  | Hypothetical protein                      | -16.34 |
| Mtr.5648.1.S1_s_at  | Enhanced disease susceptibility 5 (Eds5)  | -16.30 |
| Mtr.27399.1.S1_at   | Small basic membrane integral protein     | -16.26 |
| Mtr.36999.1.S1_at   | Photomorphogenesis repressor protein      | -16.24 |
| Mtr.31199.1.S1_s_at | Cytochrome P450                           | -16.20 |
| Mtr.43316.1.S1_at   | Symbiotic ammonium transporter            | -16.20 |
| Mtr.7085.1.S1_at    | Fatty acid elongase                       | -16.17 |
| Mtr.8591.1.S1_at    | Hypothetical protein                      | -16.16 |
| Mtr.51040.1.S1_s_at | Cytochrome b-245                          | -16.14 |
| Mtr.32904.1.S1_s_at | Phosphoglycerate kinase                   | -16.11 |
| Mtr.43509.1.S1_at   | Hypothetical protein                      | -16.08 |
| Mtr.32128.1.S1_at   | Hypothetical protein                      | -16.07 |
| Mtr.12899.1.S1_s_at | Hypothetical protein                      | -16.04 |
| Mtr.11503.1.S1_at   | Cold acclimation protein                  | -16.00 |
| Mtr.10789.1.S1_at   | Chlorophyll a oxygenase                   | -15.97 |
| Mtr.42753.1.S1_at   | Hypothetical protein                      | -15.95 |
| Mtr.3259.1.S1_at    | Hypothetical protein                      | -15.92 |
| Mtr.27648.1.S1_at   | Hypothetical protein                      | -15.88 |
| Mtr.49977.1.S1_at   | Transketolase                             | -15.88 |
| Mtr.21135.1.S1_at   | 2OG-Fe(II) oxygenase                      | -15.87 |
| Mtr.32939.1.S1_at   | Hypothetical protein                      | -15.83 |
| Mtr.20397.1.S1_s_at | Amidase, hydantoinase/carbamoylase        | -15.81 |

|                     |                                                       |        |
|---------------------|-------------------------------------------------------|--------|
| Mtr.9262.1.S1_at    | Hsc70 protein                                         | -15.80 |
| Mtr.7850.1.S1_s_at  | Thaumatococcus-like protein                           | -15.79 |
| Mtr.40232.1.S1_at   | Geranylgeranyl hydrogenase                            | -15.78 |
| Mtr.6717.1.S1_at    | Acyl-activating enzyme 14                             | -15.75 |
| Mtr.42070.1.S1_at   | Geminivirus replication protein-interacting protein   | -15.71 |
| Mtr.39126.1.S1_at   | Hypothetical protein                                  | -15.71 |
| Msa.1080.1.S1_at    | Hypothetical protein                                  | -15.68 |
| Mtr.45013.1.S1_at   | Hypothetical protein                                  | -15.67 |
| Msa.2550.1.S1_at    | Hypothetical protein                                  | -15.66 |
| Mtr.40667.1.S1_at   | Hypothetical protein                                  | -15.59 |
| Mtr.38550.1.S1_at   | Subtilisin-like proteinase                            | -15.55 |
| Mtr.6132.1.S1_s_at  | Subtilisin-like protein protease                      | -15.50 |
| Mtr.39017.1.S1_at   | Hypothetical protein                                  | -15.50 |
| Mtr.43522.1.S1_at   | Plastid-lipid associated protein PAP/fibrillin        | -15.49 |
| Mtr.38371.1.S1_at   | Hypothetical protein                                  | -15.47 |
| Mtr.37517.1.S1_at   | Basic blue protein                                    | -15.47 |
| Mtr.6877.1.S1_at    | Drought responsive element binding protein            | -15.47 |
| Mtr.41702.1.S1_at   | Hypothetical protein                                  | -15.42 |
| Mtr.51053.1.S1_at   | Hypothetical protein                                  | -15.41 |
| Mtr.919.1.S1_s_at   | Hypothetical protein                                  | -15.41 |
| Mtr.37463.1.S1_at   | CesA2                                                 | -15.39 |
| Mtr.8588.1.S1_at    | Hypothetical protein                                  | -15.39 |
| Mtr.12779.1.S1_at   | Photosystem II stability/assembly factor HCF136       | -15.36 |
| Mtr.37342.1.S1_at   | Mannitol dehydrogenase                                | -15.32 |
| Mtr.33645.1.S1_at   | Lipoate-protein ligase                                | -15.32 |
| Mtr.11387.1.S1_at   | Hypothetical protein                                  | -15.30 |
| Mtr.28597.1.S1_at   | Hypothetical protein                                  | -15.28 |
| Mtr.11416.1.S1_at   | HMG-box transcription factor 3                        | -15.25 |
| Mtr.8219.1.S1_at    | Hypothetical protein                                  | -15.22 |
| Mtr.6551.1.S1_at    | Hypothetical protein                                  | -15.18 |
| Msa.1943.1.S1_at    | Hypothetical protein                                  | -15.16 |
| Mtr.51188.1.S1_at   | Glycine hydroxymethyltransferase                      | -15.08 |
| Mtr.9437.1.S1_at    | Hypothetical protein                                  | -15.07 |
| Mtr.36889.1.S1_s_at | Hypothetical protein                                  | -15.03 |
| Mtr.43807.1.S1_at   | Hypothetical protein                                  | -14.97 |
| Mtr.6155.1.S1_at    | Protein kinase                                        | -14.94 |
| Msa.1307.1.S1_at    | Hypothetical protein                                  | -14.94 |
| Mtr.18797.1.S1_at   | Proteinase inhibitor I3                               | -14.86 |
| Mtr.6738.1.S1_at    | Receptor-like protein kinase                          | -14.86 |
| Mtr.15561.1.S1_at   | GCN5-related N-acetyltransferase                      | -14.82 |
| Mtr.10192.1.S1_at   | DREB-like protein                                     | -14.81 |
| Mtr.12806.1.S1_at   | Ascorbate oxidase promoter-binding protein            | -14.79 |
| Mtr.6869.1.S1_at    | Glutamate receptor 3.6                                | -14.79 |
| Mtr.11302.1.S1_at   | Glycosyl hydrolase                                    | -14.79 |
| Mtr.44317.1.S1_at   | ApaG protein                                          | -14.78 |
| Mtr.4339.1.S1_s_at  | Hypothetical protein                                  | -14.71 |
| Mtr.35254.1.S1_at   | Short chain dehydrogenase/reductase                   | -14.69 |
| Msa.1808.1.S1_at    | Hypothetical protein                                  | -14.69 |
| Mtr.11082.1.S1_at   | Perchloric acid soluble translation inhibitor protein | -14.65 |
| Mtr.12582.1.S1_at   | Hypothetical protein                                  | -14.65 |
| Mtr.15585.1.S1_at   | Copper/Zinc superoxide dismutase                      | -14.63 |
| Mtr.33572.1.S1_at   | Glucose transporter HXT5                              | -14.62 |
| Msa.2980.1.S1_at    | Hypothetical protein                                  | -14.62 |
| Mtr.28817.1.S1_at   | Hypothetical protein                                  | -14.60 |

|                     |                                                      |        |
|---------------------|------------------------------------------------------|--------|
| Mtr.32682.1.S1_at   | Leucyl aminopeptidase                                | -14.60 |
| Mtr.2077.1.S1_at    | Hypothetical protein                                 | -14.59 |
| Mtr.17600.1.S1_at   | Protein kinase                                       | -14.55 |
| Mtr.11295.1.S1_at   | Transport protein                                    | -14.47 |
| Msa.1357.1.S1_at    | Hypothetical protein                                 | -14.46 |
| Mtr.39718.1.S1_at   | Hypothetical protein                                 | -14.46 |
| Mtr.8410.1.S1_at    | Sulfate transporter                                  | -14.44 |
| Mtr.33861.1.S1_at   | Hypothetical protein                                 | -14.43 |
| Mtr.14704.1.S1_at   | Carbamoyl-phosphate synthase                         | -14.41 |
| Mtr.11073.1.S1_at   | Short-chain dehydrogenase Tic32                      | -14.40 |
| Mtr.14524.1.S1_at   | Glucose/ribitol dehydrogenase                        | -14.39 |
| Mtr.48866.1.S1_at   | Hypothetical protein                                 | -14.39 |
| Mtr.8811.1.S1_at    | Hypothetical protein                                 | -14.38 |
| Mtr.34376.1.S1_at   | Hypothetical protein                                 | -14.33 |
| Mtr.7197.1.S1_at    | Inositol 1,3,4-trisphosphate 5/6-kinase              | -14.32 |
| Mtr.52150.1.S1_at   | UTP-glucose-1-phosphate uridylyltransferase          | -14.31 |
| Mtr.44805.1.S1_at   | Hypothetical protein                                 | -14.29 |
| Mtr.45039.1.S1_at   | Peptidylprolyl isomerase                             | -14.28 |
| Mtr.1747.1.S1_at    | Hypothetical protein                                 | -14.23 |
| Mtr.43077.1.S1_at   | Hypothetical protein                                 | -14.22 |
| Mtr.42306.1.S1_at   | Hypothetical protein                                 | -14.21 |
| Mtr.46164.1.S1_s_at | Hypothetical protein                                 | -14.21 |
| Mtr.44854.1.S1_at   | Hypothetical protein                                 | -14.20 |
| Mtr.37749.1.S1_at   | Hypothetical protein                                 | -14.20 |
| Mtr.9046.1.S1_at    | GAST1 protein                                        | -14.19 |
| Mtr.38889.1.S1_at   | Metacaspase 3                                        | -14.18 |
| Mtr.50822.1.S1_x_at | Chlorophyll A-B binding protein                      | -14.17 |
| Msa.3192.1.S1_at    | Hypothetical protein                                 | -14.15 |
| Mtr.39266.1.S1_at   | Cation diffusion facilitator 9                       | -14.14 |
| Mtr.38438.1.S1_at   | Hypothetical protein                                 | -14.14 |
| Mtr.38471.1.S1_at   | Ring finger protein                                  | -14.10 |
| Msa.1471.1.S1_at    | Hypothetical protein                                 | -14.10 |
| Mtr.42897.1.S1_at   | Ycf23 protein                                        | -14.10 |
| Mtr.19992.1.S1_at   | Phytochrome kinase substrate 1                       | -14.09 |
| Mtr.33891.1.S1_at   | Hypothetical protein                                 | -14.09 |
| Msa.1744.1.S1_at    | Hypothetical protein                                 | -14.01 |
| Mtr.9686.1.S1_at    | Beta-1,3-glucanase                                   | -14.00 |
| Mtr.26499.1.S1_at   | Lateral organ boundaries (LOB) domain family protein | -13.96 |
| Mtr.15459.1.S1_at   | Major intrinsic protein                              | -13.94 |
| Mtr.35044.1.S1_at   | Nine-cis-epoxycarotenoid dioxygenase2                | -13.93 |
| Mtr.49786.1.S1_x_at | Glycosyl hydrolases family 17                        | -13.93 |
| Mtr.16202.1.S1_at   | Esterase/lipase/thioesterase                         | -13.92 |
| Mtr.33004.1.S1_at   | Hypothetical protein                                 | -13.91 |
| Mtr.33489.1.S1_at   | ABC transporter                                      | -13.89 |
| Mtr.39715.1.S1_at   | Isopiperitenone reductase                            | -13.86 |
| Mtr.38724.1.S1_at   | Hypothetical protein                                 | -13.85 |
| Mtr.50016.1.S1_at   | Hypothetical protein                                 | -13.84 |
| Mtr.18579.1.S1_at   | Myb, DNA-binding                                     | -13.84 |
| Mtr.39302.1.S1_at   | Translation initiation factor IF-2                   | -13.76 |
| Mtr.44703.1.S1_at   | Hypothetical protein                                 | -13.76 |
| Msa.1547.1.S1_at    | Hypothetical protein                                 | -13.76 |
| Mtr.38356.1.S1_s_at | Hypothetical protein                                 | -13.73 |
| Mtr.27619.1.S1_at   | Hypothetical protein                                 | -13.72 |
| Mtr.12770.1.S1_at   | Phosphoglucomutase                                   | -13.70 |

|                     |                                                       |        |
|---------------------|-------------------------------------------------------|--------|
| Mtr.13545.1.S1_at   | Hypothetical protein                                  | -13.66 |
| Mtr.41958.1.S1_at   | Hypothetical protein                                  | -13.64 |
| Mtr.1639.1.S1_at    | Hypothetical protein                                  | -13.63 |
| Mtr.20515.1.S1_at   | Ferrochelatase                                        | -13.61 |
| Mtr.42075.1.S1_at   | Cytochrome P450                                       | -13.61 |
| Mtr.13134.1.S1_at   | Hypothetical protein                                  | -13.59 |
| Mtr.42019.1.S1_at   | ClpB heat shock protein                               | -13.59 |
| Mtr.32665.1.S1_s_at | Myo-inositol-1-phosphate synthase                     | -13.57 |
| Msa.1850.1.S1_at    | Hypothetical protein                                  | -13.56 |
| Mtr.27875.1.S1_at   | Hypothetical protein                                  | -13.56 |
| Mtr.43498.1.S1_at   | Hypothetical protein                                  | -13.55 |
| Mtr.4983.1.S1_at    | Hypothetical protein                                  | -13.53 |
| Mtr.12256.1.S1_at   | Nonspecific lipid-transfer protein precursor (LTP)    | -13.50 |
| Msa.3182.1.S1_at    | Hypothetical protein                                  | -13.49 |
| Msa.1421.1.S1_at    | Hypothetical protein                                  | -13.46 |
| Mtr.41524.1.S1_at   | Sulfate transporter                                   | -13.46 |
| Mtr.31300.1.S1_at   | Disease resistance response protein                   | -13.45 |
| Mtr.11662.1.S1_at   | Hypothetical protein                                  | -13.43 |
| Mtr.8575.1.S1_at    | Glucosyltransferase-13                                | -13.42 |
| Mtr.12199.1.S1_at   | Ascorbate oxidase promoter-binding protein            | -13.41 |
| Mtr.8517.1.S1_at    | Mannitol dehydrogenase                                | -13.41 |
| Mtr.38850.1.S1_at   | Hypothetical protein                                  | -13.39 |
| Mtr.33674.1.S1_s_at | Glutamyl-tRNA reductase 1                             | -13.34 |
| Mtr.8972.1.S1_at    | Hypothetical protein                                  | -13.25 |
| Mtr.8900.1.S1_at    | Hypothetical protein                                  | -13.25 |
| Mtr.29086.1.S1_at   | Hypothetical protein                                  | -13.24 |
| Msa.3188.1.S1_at    | Hypothetical protein                                  | -13.23 |
| Mtr.41681.1.S1_at   | Phosphoglycerate kinase                               | -13.22 |
| Mtr.15285.1.S1_at   | Myo-inositol-1-phosphate synthase                     | -13.22 |
| Mtr.29826.1.S1_at   | Hypothetical protein                                  | -13.21 |
| Mtr.21718.1.S1_at   | Leucine-rich repeat protein                           | -13.21 |
| Mtr.42914.1.S1_x_at | Ribulose 1,5-bisphosphate carboxylase small subunit   | -13.20 |
| Mtr.44535.1.S1_at   | ClpB heat shock protein                               | -13.17 |
| Mtr.41840.1.S1_at   | Cation diffusion facilitator 10                       | -13.17 |
| Mtr.46740.1.S1_at   | Hypothetical protein                                  | -13.12 |
| Mtr.48959.1.S1_at   | Flavoprotein pyridine nucleotide cytochrome reductase | -13.10 |
| Mtr.5325.1.S1_at    | Hypothetical protein                                  | -13.09 |
| Mtr.45561.1.S1_at   | 4-coumarate-CoA ligase-like protein                   | -13.08 |
| Mtr.27132.1.S1_at   | Histidine-containing phosphotransfer protein          | -13.06 |
| Mtr.28079.1.S1_at   | Hypothetical protein                                  | -13.02 |
| Msa.2629.1.S1_at    | Hypothetical protein                                  | -13.01 |
| Mtr.32723.1.S1_at   | Formiminotransferase-cyclodeaminase                   | -12.98 |
| Mtr.33044.1.S1_s_at | Hypothetical protein                                  | -12.98 |
| Mtr.34177.1.S1_at   | Hypothetical protein                                  | -12.96 |
| Mtr.5651.1.S1_at    | Hypothetical protein                                  | -12.95 |
| Mtr.28166.1.S1_s_at | Dihydrolipoamide Dehydrogenase                        | -12.95 |
| Mtr.11364.1.S1_at   | Cytochrome P450                                       | -12.95 |
| Mtr.45068.1.S1_at   | Hypothetical protein                                  | -12.94 |
| Mtr.37335.1.S1_at   | Chlorophyll a/b-binding protein                       | -12.94 |
| Mtr.15109.1.S1_s_at | Hypothetical protein                                  | -12.93 |
| Mtr.2086.1.S1_at    | Hypothetical protein                                  | -12.91 |
| Mtr.26786.1.S1_at   | Hypothetical protein                                  | -12.91 |
| Msa.1109.1.S1_at    | Hypothetical protein                                  | -12.90 |
| Mtr.13330.1.S1_at   | Hypothetical protein                                  | -12.87 |

|                     |                                         |        |
|---------------------|-----------------------------------------|--------|
| Mtr.5783.1.S1_at    | Flavin containing monooxygenase 3       | -12.87 |
| Mtr.15413.1.S1_at   | Haloacid dehalogenase/epoxide hydrolase | -12.86 |
| Mtr.38984.1.S1_at   | Hypothetical protein                    | -12.85 |
| Mtr.43037.1.S1_at   | Glyoxysomal malate dehydrogenase        | -12.84 |
| Msa.1749.1.S1_at    | Hypothetical protein                    | -12.84 |
| Mtr.21762.1.S1_s_at | Hypothetical protein                    | -12.79 |
| Mtr.22693.1.S1_s_at | Hypothetical protein                    | -12.78 |
| Msa.1101.1.S1_at    | Hypothetical protein                    | -12.77 |
| Mtr.13053.1.S1_s_at | Uroporphyrin III methylase              | -12.75 |
| Mtr.15923.1.S1_at   | Peptidylprolyl isomerase, FKBP-type     | -12.75 |
| Mtr.4716.1.S1_at    | Nitrite transport protein               | -12.75 |
| Mtr.17489.1.S1_at   | Hypothetical protein                    | -12.74 |
| Mtr.18086.1.S1_at   | RNA-directed DNA polymerase             | -12.73 |
| Mtr.35894.1.S1_at   | Hypothetical protein                    | -12.72 |
| Mtr.8670.1.S1_at    | Hypothetical protein                    | -12.71 |
| Mtr.39411.1.S1_at   | Sulfate transporter 3.3                 | -12.67 |
| Mtr.11332.1.S1_at   | Hypothetical protein                    | -12.67 |
| Mtr.15310.1.S1_at   | Fatty acid desaturase                   | -12.65 |
| Mtr.33113.1.S1_at   | Hypothetical protein                    | -12.63 |
| Mtr.18220.1.S1_s_at | Hypothetical protein                    | -12.61 |
| Mtr.40204.1.S1_at   | Aldehyde dehydrogenase 1                | -12.61 |
| Mtr.40710.1.S1_at   | Malate dehydrogenase                    | -12.61 |
| Mtr.848.1.S1_s_at   | Hypothetical protein                    | -12.58 |
| Mtr.26042.1.S1_at   | Hypothetical protein                    | -12.58 |
| Mtr.48548.1.S1_at   | Deoxyxylulose-5-phosphate synthase      | -12.56 |
| Mtr.19517.1.S1_at   | Ribulose biphosphate carboxylase        | -12.56 |
| Mtr.19562.1.S1_at   | Zn-finger, RING                         | -12.55 |
| Mtr.43200.1.S1_at   | Adenosine 5'-phosphosulfate reductase   | -12.55 |
| Mtr.51819.1.S1_at   | Hypothetical protein                    | -12.53 |
| Sme.4919.1.S1_at    | Hypothetical protein                    | -12.53 |
| Mtr.38552.1.S1_s_at | Hypothetical protein                    | -12.50 |
| Mtr.39104.1.S1_at   | Xylulose kinase                         | -12.46 |
| Mtr.11001.1.S1_at   | Hypothetical protein                    | -12.44 |
| Msa.2871.1.S1_at    | Hypothetical protein                    | -12.43 |
| Mtr.50743.1.S1_at   | Hypothetical protein                    | -12.42 |
| Mtr.34745.1.S1_at   | Thylakoid lumenal 17.9 kDa protein      | -12.38 |
| Mtr.34827.1.S1_at   | Hypothetical protein                    | -12.37 |
| Mtr.37681.1.S1_s_at | Hypothetical protein                    | -12.37 |
| Mtr.42595.1.S1_at   | Hypothetical protein                    | -12.37 |
| Mtr.33011.1.S1_at   | Copper transport protein                | -12.36 |
| Mtr.18705.1.S1_at   | Peptidase C1A                           | -12.32 |
| Mtr.50874.1.S1_at   | Calcium-binding EF-hand protein         | -12.31 |
| Mtr.8715.1.S1_at    | UDP-glucose glucosyltransferase         | -12.29 |
| Mtr.12821.1.S1_at   | Phosphoglucomutase                      | -12.28 |
| Mtr.25657.1.S1_at   | Cell wall protein                       | -12.27 |
| Mtr.41129.1.S1_s_at | Hypothetical protein                    | -12.27 |
| Mtr.1814.1.S1_at    | RING-H2 zinc finger protein RHA4a       | -12.26 |
| Mtr.33495.1.S1_at   | Hypothetical protein                    | -12.25 |
| Mtr.33532.1.S1_at   | Kinesin heavy chain                     | -12.25 |
| Mtr.43503.1.S1_at   | Hypothetical protein                    | -12.23 |
| Mtr.11556.1.S1_at   | Carbohydrate oxidase                    | -12.23 |
| Mtr.39352.1.S1_at   | Hypothetical protein                    | -12.21 |
| Msa.3102.1.S1_x_at  | Hypothetical protein                    | -12.19 |
| Mtr.33622.1.S1_at   | Dehydration-responsive family protein   | -12.19 |



|                     |                                                                               |        |
|---------------------|-------------------------------------------------------------------------------|--------|
| Mtr.33700.1.S1_at   | Hypothetical protein                                                          | -12.17 |
| Msa.1818.1.S1_at    | Hypothetical protein                                                          | -12.17 |
| Mtr.9742.1.S1_at    | Geminivirus replication protein-interacting protein                           | -12.16 |
| Mtr.23672.1.S1_at   | 51 kDa seed maturation protein                                                | -12.16 |
| Mtr.13744.1.S1_at   | Transmembrane transport protein                                               | -12.07 |
| Mtr.33476.1.S1_at   | Receptor protein kinase                                                       | -12.07 |
| Mtr.36454.1.S1_at   | Hypothetical protein                                                          | -12.05 |
| Msa.2727.1.S1_at    | Hypothetical protein                                                          | -12.03 |
| Mtr.13059.1.S1_at   | Hypothetical protein                                                          | -12.02 |
| Mtr.13053.1.S1_at   | Urophorphyrin III methylase                                                   | -12.02 |
| Mtr.37855.1.S1_at   | MAP kinase                                                                    | -12.01 |
| Mtr.38437.1.S1_at   | Hypothetical protein                                                          | -12.00 |
| Mtr.51445.1.S1_x_at | Hypothetical protein                                                          | -11.98 |
| Mtr.10206.1.S1_at   | Pentatricopeptide (PPR) repeat-containing protein                             | -11.97 |
| Mtr.51423.1.S1_at   | Sugar transporter                                                             | -11.97 |
| Mtr.6362.1.S1_at    | Aminopeptidase 2                                                              | -11.96 |
| Mtr.25983.1.S1_s_at | Pectinesterase 2                                                              | -11.90 |
| Msa.1191.1.S1_at    | Hypothetical protein                                                          | -11.90 |
| Mtr.5845.1.S1_at    | Hypothetical protein                                                          | -11.90 |
| Mtr.39095.1.S1_at   | Alcohol oxidase                                                               | -11.89 |
| Mtr.41063.1.S1_at   | Nine-cis-epoxycarotenoid dioxygenase4                                         | -11.87 |
| Mtr.48945.1.S1_s_at | Ferrochelatase                                                                | -11.86 |
| Mtr.38798.1.S1_at   | Hypothetical protein                                                          | -11.85 |
| Mtr.42326.1.S1_s_at | Hypothetical protein                                                          | -11.85 |
| Mtr.9418.1.S1_s_at  | Pathogenesis-related protein                                                  | -11.85 |
| Mtr.13975.1.S1_at   | Ycf23 protein                                                                 | -11.84 |
| Mtr.8362.1.S1_at    | Hypothetical protein                                                          | -11.80 |
| Mtr.42918.1.S1_at   | Protein disulfide isomerase                                                   | -11.80 |
| Msa.2278.1.S1_at    | Hypothetical protein                                                          | -11.79 |
| Mtr.44654.1.S1_at   | Hypothetical protein                                                          | -11.79 |
| Mtr.15310.1.S1_s_at | Fatty acid desaturase                                                         | -11.78 |
| Mtr.33529.1.S1_at   | Hypothetical protein                                                          | -11.77 |
| Mtr.48351.1.S1_at   | Proteinase inhibitor 20                                                       | -11.77 |
| Mtr.21341.1.S1_at   | Glutamyl-tRNA reductase                                                       | -11.75 |
| Mtr.11548.1.S1_at   | Starch synthase isoform SS III                                                | -11.75 |
| Mtr.33522.1.S1_at   | Hypothetical protein                                                          | -11.74 |
| Mtr.5344.1.S1_at    | Cellulose synthase                                                            | -11.72 |
| Mtr.12260.1.S1_at   | 2-Cys peroxiredoxin                                                           | -11.70 |
| Mtr.43282.1.S1_at   | S-adenosyl-L-methionine: 2,7,4'-trihydroxyisoflavanone 4'-O-methyltransferase | -11.70 |
| Mtr.50015.1.S1_at   | Hypothetical protein                                                          | -11.67 |
| Mtr.38432.1.S1_at   | Temperature stress-induced lipocalin                                          | -11.66 |
| Mtr.43717.1.S1_at   | Hypothetical protein                                                          | -11.65 |
| Mtr.35794.1.S1_at   | Myo-inositol 1-phosphate synthase                                             | -11.60 |
| Mtr.33765.1.S1_s_at | Hypothetical protein                                                          | -11.59 |
| Msa.1095.1.S1_at    | Hypothetical protein                                                          | -11.57 |
| Mtr.19902.1.S1_at   | Isochorismate synthases                                                       | -11.55 |
| Mtr.39370.1.S1_at   | Hypothetical protein                                                          | -11.55 |
| Mtr.48272.1.S1_at   | Glycine dehydrogenase                                                         | -11.55 |
| Mtr.13458.1.S1_at   | 3(2),5-BISPHOSPHATE NUCLEOTIDASE-like protein                                 | -11.54 |
| Mtr.41202.1.S1_at   | Hypothetical protein                                                          | -11.54 |
| Mtr.40443.1.S1_at   | 50S ribosomal protein L13                                                     | -11.47 |
| Mtr.5418.1.S1_at    | Magnesium transporter protein                                                 | -11.46 |
| Mtr.11931.1.S1_at   | Long chain acyl-CoA synthetase                                                | -11.42 |
| Mtr.10301.1.S1_s_at | 18S ribosomal RNA                                                             | -11.39 |

|                     |                                                       |        |
|---------------------|-------------------------------------------------------|--------|
| Mtr.41906.1.S1_at   | Hypothetical protein                                  | -11.37 |
| Mtr.37783.1.S1_at   | Epoxide hydrolase                                     | -11.35 |
| Mtr.11791.1.S1_at   | Hypothetical protein                                  | -11.32 |
| Mtr.33484.1.S1_s_at | Hypothetical protein                                  | -11.31 |
| Mtr.18604.1.S1_at   | Hypothetical protein                                  | -11.29 |
| Mtr.45935.1.S1_at   | Hypothetical protein                                  | -11.29 |
| Mtr.47934.1.S1_at   | Amino acid permease 6 (AAP6)                          | -11.23 |
| Mtr.40697.1.S1_at   | Putativepod-specific dehydrogenase SAC25              | -11.23 |
| Mtr.40730.1.S1_at   | Thylakoid lumenal 16.5 kDa protein                    | -11.22 |
| Mtr.46511.1.S1_x_at | Alpha/beta-amyrin synthase                            | -11.20 |
| Mtr.44020.1.S1_at   | Brn1-like protein                                     | -11.19 |
| Mtr.46060.1.S1_at   | Hypothetical protein                                  | -11.19 |
| Mtr.38392.1.S1_at   | ClpB heat shock protein                               | -11.18 |
| Msa.2820.1.S1_at    | Hypothetical protein                                  | -11.18 |
| Mtr.10088.1.S1_at   | Hypothetical protein                                  | -11.18 |
| Mtr.34189.1.S1_at   | Hypothetical protein                                  | -11.17 |
| Mtr.1268.1.S1_at    | Hypothetical protein                                  | -11.15 |
| Msa.1161.1.S1_at    | Hypothetical protein                                  | -11.14 |
| Mtr.1231.1.S1_s_at  | Omega-6 fatty acid desaturase                         | -11.13 |
| Mtr.5039.1.S1_at    | Receptor protein                                      | -11.13 |
| Mtr.41940.1.S1_at   | Hypothetical protein                                  | -11.12 |
| Msa.2646.1.S1_at    | Hypothetical protein                                  | -11.11 |
| Msa.858.1.S1_at     | Hypothetical protein                                  | -11.10 |
| Mtr.12983.1.S1_at   | Isp4 like protein                                     | -11.09 |
| Mtr.34700.1.S1_at   | Tryptophan synthase beta chain 1                      | -11.08 |
| Mtr.22897.1.S1_s_at | Polygalacturonase                                     | -11.08 |
| Mtr.9582.1.S1_at    | Glycogen(starch) synthase                             | -11.07 |
| Msa.3052.1.S1_at    | Hypothetical protein                                  | -11.07 |
| Mtr.29995.1.S1_at   | Hypothetical protein                                  | -11.07 |
| Mtr.875.1.S1_s_at   | Thioredoxin x                                         | -11.02 |
| Mtr.42253.1.S1_at   | Hypothetical protein                                  | -11.00 |
| Mtr.1429.1.S1_s_at  | Hypothetical protein                                  | -10.99 |
| Mtr.20473.1.S1_at   | Hypothetical protein                                  | -10.98 |
| Mtr.11668.1.S1_at   | Hypothetical protein                                  | -10.96 |
| Mtr.5358.1.S1_at    | Cellulose synthase                                    | -10.96 |
| Mtr.44986.1.S1_at   | Acytransferase-like protein                           | -10.94 |
| Mtr.42587.1.S1_at   | Heat shock transcription factor                       | -10.92 |
| Mtr.12259.1.S1_at   | Rubisco activase                                      | -10.92 |
| Mtr.24070.1.S1_at   | Plastid-lipid associated protein PAP/fibrillin family | -10.92 |
| Mtr.41590.1.S1_at   | Hypothetical protein                                  | -10.90 |
| Mtr.19310.1.S1_s_at | N-acetyl-gamma-glutamyl-phosphate reductase           | -10.90 |
| Mtr.44282.1.S1_s_at | THA4 protein                                          | -10.89 |
| Mtr.37780.1.S1_at   | Alpha-glucan phosphorylase                            | -10.88 |
| Mtr.40444.1.S1_at   | Hypothetical protein                                  | -10.88 |
| Mtr.28722.1.S1_at   | Peptide transporter                                   | -10.85 |
| Mtr.41751.1.S1_at   | Hypothetical protein                                  | -10.84 |
| Mtr.16188.1.S1_at   | Hypothetical protein                                  | -10.84 |
| Msa.3102.1.S1_at    | Hypothetical protein                                  | -10.83 |
| Mtr.13843.1.S1_at   | Hypothetical protein                                  | -10.82 |
| Mtr.17233.1.S1_at   | Hypothetical protein                                  | -10.80 |
| Mtr.44543.1.S1_at   | Transmembrane transport protein                       | -10.80 |
| Mtr.10480.1.S1_at   | Glutamine synthetase                                  | -10.79 |
| Mtr.5768.1.S1_at    | Tab2 protein                                          | -10.78 |
| Mtr.38433.1.S1_at   | Hypothetical protein                                  | -10.75 |

|                     |                                                                  |        |
|---------------------|------------------------------------------------------------------|--------|
| Mtr.15109.1.S1_at   | Hypothetical protein                                             | -10.75 |
| Mtr.11664.1.S1_at   | MYB transcription factor                                         | -10.74 |
| Mtr.5646.1.S1_at    | Glutathione S-transferase                                        | -10.73 |
| Mtr.41073.1.S1_at   | FPF1 protein                                                     | -10.72 |
| Mtr.8920.1.S1_at    | 2-oxoglutarate/malate translocator                               | -10.72 |
| Mtr.15051.1.S1_s_at | Hypothetical protein                                             | -10.70 |
| Mtr.13956.1.S1_at   | 2-oxoglutarate/malate translocator                               | -10.69 |
| Mtr.45404.1.S1_at   | Glycine/D-amino acid oxidases                                    | -10.69 |
| Mtr.12884.1.S1_at   | Thioredoxin x                                                    | -10.69 |
| Mtr.40462.1.S1_at   | Hypothetical protein                                             | -10.68 |
| Mtr.10889.1.S1_at   | Hypothetical protein                                             | -10.67 |
| Mtr.38676.1.S1_at   | Methyltransferase                                                | -10.67 |
| Mtr.23337.1.S1_at   | Nonphototrophic hypocotyl 1b                                     | -10.66 |
| Mtr.39379.1.S1_s_at | Amino acid permease 6                                            | -10.63 |
| Mtr.50822.1.S1_at   | Chlorophyll A-B binding protein                                  | -10.62 |
| Mtr.41868.1.S1_at   | Tryptophan synthase beta chain 1                                 | -10.61 |
| Mtr.17765.1.S1_at   | TGF-beta receptor                                                | -10.58 |
| Mtr.50035.1.S1_at   | Hypothetical protein                                             | -10.57 |
| Mtr.42933.1.S1_s_at | Nonspecific lipid-transfer protein precursor                     | -10.56 |
| Mtr.42982.1.S1_at   | Carbonic anhydrase                                               | -10.55 |
| Mtr.41668.1.S1_at   | Ribulose-bisphosphate carboxylase activase large isoform protein | -10.55 |
| Mtr.38283.1.S1_at   | Hypothetical protein                                             | -10.54 |
| Msa.1928.1.S1_at    | Hypothetical protein                                             | -10.52 |
| Mtr.48721.1.S1_at   | Cytochrome c                                                     | -10.50 |
| Mtr.25494.1.S1_at   | Galactinol synthase                                              | -10.50 |
| Mtr.41054.1.S1_at   | UDP-glucose glucosyltransferase                                  | -10.48 |
| Mtr.26672.1.S1_s_at | Hypothetical protein                                             | -10.47 |
| Mtr.6694.1.S1_at    | Na/Ca,K-exchanger-like protein                                   | -10.44 |
| Mtr.34902.1.S1_s_at | Phosphoenolpyruvate carboxylase                                  | -10.44 |
| Mtr.12909.1.S1_at   | Hypothetical protein                                             | -10.44 |
| Mtr.43681.1.S1_at   | CYP1                                                             | -10.43 |
| Mtr.32760.1.S1_at   | Hypothetical protein                                             | -10.41 |
| Msa.3105.1.S1_at    | Hypothetical protein                                             | -10.41 |
| Mtr.28238.1.S1_at   | Subtilisin-like protease                                         | -10.40 |
| Msa.1143.1.S1_s_at  | Hypothetical protein                                             | -10.39 |
| Msa.1655.1.S1_at    | Hypothetical protein                                             | -10.39 |
| Mtr.24929.1.S1_at   | Hypothetical protein                                             | -10.39 |
| Mtr.38458.1.S1_at   | FKBP-type peptidyl-prolyl cis-trans isomerase 2                  | -10.38 |
| Mtr.20818.1.S1_at   | Xylulose kinase                                                  | -10.38 |
| Mtr.37298.1.S1_at   | Cytochrome P450                                                  | -10.36 |
| Mtr.35945.1.S1_at   | UDP-glycose:flavonoid glycosyltransferase                        | -10.35 |
| Mtr.42315.1.S1_at   | Starch synthase isoform SS III                                   | -10.34 |
| Mtr.37930.1.S1_at   | Hypothetical protein                                             | -10.32 |
| Msa.989.1.S1_s_at   | Hypothetical protein                                             | -10.31 |
| Mtr.41089.1.S1_at   | Hypothetical protein                                             | -10.30 |
| Mtr.10485.1.S1_at   | Glucose-6-phosphate isomerase                                    | -10.28 |
| Mtr.44724.1.S1_at   | Anthocyanin acyltransferase                                      | -10.28 |
| Mtr.37389.1.S1_at   | Triose phosphate/phosphate translocator                          | -10.28 |
| Mtr.41162.1.S1_at   | Hypothetical protein                                             | -10.26 |
| Mtr.21118.1.S1_at   | Hypothetical protein                                             | -10.25 |
| Mtr.32529.1.S1_at   | Transcription factor                                             | -10.20 |
| Mtr.12543.1.S1_at   | Early nodulin-like protein 2                                     | -10.17 |
| Mtr.44653.1.S1_at   | Myb-related transcription activator                              | -10.17 |
| Mtr.19267.1.S1_at   | Photosystem I protein PsuD                                       | -10.16 |

|                     |                                                     |        |
|---------------------|-----------------------------------------------------|--------|
| Mtr.2960.1.S1_at    | Magnesium transporter protein                       | -10.14 |
| Msa.1508.1.S1_at    | Hypothetical protein                                | -10.14 |
| Mtr.24883.1.S1_at   | Hypothetical protein                                | -10.13 |
| Mtr.9192.1.S1_at    | Putativedisease resistance protein                  | -10.12 |
| Mtr.34741.1.S1_at   | 3(2),5-BISPHOSPHATE NUCLEOTIDASE                    | -10.11 |
| Mtr.7329.1.S1_at    | Ribulose-1,5-bisphosphate carboxylase small subunit | -10.09 |
| Mtr.12448.1.S1_at   | IAA-Ala hydrolase (IAR3)                            | -10.09 |
| Msa.1640.1.S1_at    | Hypothetical protein                                | -10.08 |
| Mtr.17357.1.S1_at   | Hypothetical protein                                | -10.07 |
| Mtr.5120.1.S1_at    | Hypothetical protein                                | -10.07 |
| Mtr.11734.1.S1_at   | Sulfate transporter 2.1                             | -10.04 |
| Mtr.14356.1.S1_at   | Photosystem I reaction centre subunit IV/PsaE       | -10.03 |
| Mtr.8730.1.S1_at    | Hypothetical protein                                | -10.02 |
| Mtr.6746.1.S1_s_at  | LEM3 (Ligand-effect modulator 3)                    | -10.02 |
| Mtr.43527.1.S1_at   | Hypothetical protein                                | -10.00 |
| Mtr.34711.1.S1_at   | C-type cytochrome biogenesis protein                | -9.99  |
| Mtr.41079.1.S1_at   | NADH dehydrogenase subunit 1                        | -9.98  |
| Mtr.12422.1.S1_at   | Ferredoxin-dependent glutamate synthase             | -9.97  |
| Mtr.42033.1.S1_at   | Hypothetical protein                                | -9.96  |
| Mtr.45384.1.S1_at   | Hypothetical protein                                | -9.96  |
| Mtr.39387.1.S1_at   | DCL protein                                         | -9.96  |
| Mtr.39699.1.S1_at   | Hypothetical protein                                | -9.93  |
| Mtr.39164.1.S1_at   | Hypothetical protein                                | -9.91  |
| Mtr.36996.1.S1_at   | Hypothetical protein                                | -9.91  |
| Mtr.9952.1.S1_at    | Hypothetical protein                                | -9.91  |
| Mtr.32580.1.S1_at   | Alpha-mannosidase                                   | -9.90  |
| Mtr.37643.1.S1_at   | NADP-dependent oxidoreductase P2                    | -9.88  |
| Mtr.24731.1.S1_at   | Hypothetical protein                                | -9.88  |
| Mtr.33417.1.S1_at   | MRP-like ABC transporter                            | -9.88  |
| Mtr.3511.1.S1_at    | Anthranilate N-hydroxycinnamoyl/benzoyltransferase  | -9.88  |
| Mtr.2057.1.S1_s_at  | Glutamate/malate translocator                       | -9.86  |
| Mtr.34799.1.S1_at   | Hypothetical protein                                | -9.85  |
| Mtr.50122.1.S1_at   | Hypothetical protein                                | -9.82  |
| Mtr.11129.1.S1_at   | Hypothetical protein                                | -9.82  |
| Mtr.12203.1.S1_at   | Ribulose 1,5-bisphosphate carboxylase small subunit | -9.82  |
| Mtr.12846.1.S1_at   | MAP3K-like protein kinase                           | -9.81  |
| Msa.1377.1.S1_at    | Hypothetical protein                                | -9.78  |
| Mtr.27359.1.S1_at   | Isoleucyl-tRNA synthetase                           | -9.78  |
| Mtr.18566.1.S1_at   | Pyruvate kinase                                     | -9.78  |
| Mtr.44971.1.S1_at   | Hypothetical protein                                | -9.75  |
| Mtr.40422.1.S1_at   | Dihydrolipoyl dehydrogenase                         | -9.73  |
| Mtr.33745.1.S1_s_at | Hypothetical protein                                | -9.73  |
| Mtr.24793.1.S1_at   | Blight resistance protein RGA1                      | -9.73  |
| Mtr.37427.1.S1_at   | Aquaporin TIP4.1 (Tonoplast intrinsic protein 4.1)  | -9.73  |
| Mtr.9757.1.S1_at    | Quinolate phosphoribosyltransferase                 | -9.72  |
| Mtr.7389.1.S1_at    | Yippee-like protein                                 | -9.72  |
| Mtr.44198.1.S1_at   | Hypothetical protein                                | -9.71  |
| Mtr.30762.1.S1_at   | Anthocyanin acyltransferase                         | -9.70  |
| Mtr.42326.1.S1_at   | Hypothetical protein                                | -9.70  |
| Mtr.5135.1.S1_at    | Protein kinase                                      | -9.70  |
| Mtr.27055.1.S1_s_at | Plastid RNA polymerase sigma-subunit                | -9.69  |
| Mtr.43061.1.S1_s_at | GTP-binding protein TypA                            | -9.69  |
| Mtr.49274.1.S1_at   | Cupredoxin                                          | -9.68  |
| Mtr.40347.1.S1_at   | Omega-3 fatty acid desaturase                       | -9.67  |

|                     |                                                    |       |
|---------------------|----------------------------------------------------|-------|
| Mtr.44539.1.S1_at   | Ent-kaurenoic acid oxidase                         | -9.67 |
| Mtr.12188.1.S1_at   | Hypothetical protein                               | -9.67 |
| Mtr.13898.1.S1_at   | GPI-anchored protein                               | -9.65 |
| Mtr.44897.1.S1_at   | Hypothetical protein                               | -9.60 |
| Msa.1495.1.S1_at    | Hypothetical protein                               | -9.59 |
| Mtr.26801.1.S1_a_at | Hypothetical protein                               | -9.57 |
| Mtr.17305.1.S1_at   | Peptidase S41                                      | -9.57 |
| Mtr.39782.1.S1_at   | Ppib protein                                       | -9.55 |
| Mtr.2103.1.S1_at    | Hypothetical protein                               | -9.54 |
| Mtr.31624.1.S1_at   | Hypothetical protein                               | -9.54 |
| Mtr.525.1.S1_at     | Hypothetical protein                               | -9.53 |
| Mtr.45133.1.S1_at   | Amine oxidase                                      | -9.53 |
| Mtr.7520.1.S1_at    | Hypothetical protein                               | -9.51 |
| Mtr.44150.1.S1_at   | Myristoyl-acyl carrier protein thioesterase        | -9.50 |
| Mtr.41860.1.S1_at   | Leucine-rich repeat receptor-like protein kinase 1 | -9.49 |
| Mtr.47369.1.S1_at   | ABC transporter                                    | -9.45 |
| Mtr.9168.1.S1_at    | Hypothetical protein                               | -9.45 |
| Mtr.25951.1.S1_at   | Hypothetical protein                               | -9.44 |
| Mtr.30196.1.S1_at   | Salicylic acid carboxyl methyltransferase          | -9.42 |
| Mtr.50952.1.S1_at   | Ribosomal protein L9                               | -9.40 |
| Mtr.44491.1.S1_at   | Hypothetical protein                               | -9.38 |
| Mtr.21678.1.S1_at   | YABBY protein                                      | -9.35 |
| Mtr.37550.1.S1_at   | 4-alpha-glucanotransferase                         | -9.35 |
| Mtr.22897.1.S1_at   | Polygalacturonase                                  | -9.34 |
| Mtr.34747.1.S1_at   | Hypothetical protein                               | -9.34 |
| Mtr.37624.1.S1_at   | 3-beta-hydroxysteroiddehydrogenase                 | -9.33 |
| Mtr.49172.1.S1_at   | Hypothetical protein                               | -9.33 |
| Mtr.44760.1.S1_at   | Sulfolipid synthase                                | -9.32 |
| Mtr.47977.1.S1_at   | Nodule-specific protein Nlj70                      | -9.31 |
| Mtr.40508.1.S1_at   | Magnesium-chelatase                                | -9.31 |
| Mtr.8954.1.S1_at    | Hypothetical protein                               | -9.30 |
| Mtr.39433.1.S1_at   | Xyloglucan endotransglucosylase/hydrolase          | -9.29 |
| Mtr.40886.1.S1_at   | Hypothetical protein                               | -9.29 |
| Mtr.49015.1.S1_at   | Chlorophyll A-B binding protein                    | -9.29 |
| Msa.2534.1.S1_at    | Hypothetical protein                               | -9.28 |
| Mtr.34708.1.S1_at   | Sulfolipid synthase                                | -9.27 |
| Mtr.36804.1.S1_at   | Hypothetical protein                               | -9.27 |
| Mtr.50754.1.S1_at   | Hypothetical protein                               | -9.26 |
| Mtr.19984.1.S1_at   | Hypothetical protein                               | -9.25 |
| Mtr.50001.1.S1_s_at | Glutamate synthase                                 | -9.24 |
| Mtr.1885.1.S1_at    | Symbiotic ammonium transporter                     | -9.23 |
| Mtr.33426.1.S1_at   | MRP-like ABC transporter                           | -9.22 |
| Mtr.42265.1.S1_at   | Transmembrane protein kinase                       | -9.19 |
| Mtr.43762.1.S1_at   | Hypothetical protein                               | -9.18 |
| Mtr.37525.1.S1_at   | Multifunctional aquaporin                          | -9.17 |
| Mtr.14312.1.S1_at   | Hypothetical protein                               | -9.16 |
| Mtr.51597.1.S1_at   | Hypothetical protein                               | -9.14 |
| Mtr.41408.1.S1_at   | Hypothetical protein                               | -9.14 |
| Mtr.17068.1.S1_at   | WD-40 repeat protein                               | -9.13 |
| Mtr.929.1.S1_s_at   | Hypothetical protein                               | -9.12 |
| Mtr.14453.1.S1_at   | Rhodanese-like protein                             | -9.12 |
| Mtr.51258.1.S1_at   | Annexin                                            | -9.08 |
| Mtr.15871.1.S1_at   | Hypothetical protein                               | -9.08 |
| Mtr.768.1.S1_at     | Hypothetical protein                               | -9.08 |

|                     |                                           |       |
|---------------------|-------------------------------------------|-------|
| Mtr.10707.1.S1_at   | Indole-3-acetic acid induced protein ARG2 | -9.07 |
| Mtr.40799.1.S1_at   | Subtilisin-like protease                  | -9.07 |
| Mtr.27862.1.S1_s_at | Hypothetical protein                      | -9.06 |
| Mtr.45368.1.S1_at   | Acetolactate synthase                     | -9.05 |
| Mtr.40230.1.S1_at   | Photosystem I reaction center subunit V   | -9.04 |
| Mtr.28675.1.S1_at   | Polygalacturonase                         | -9.04 |
| Mtr.43060.1.S1_at   | GTP-binding protein TypA                  | -9.04 |
| Mtr.5844.1.S1_at    | Ternary complex factor MIP1-like protein  | -9.04 |
| Mtr.20646.1.S1_s_at | Glucose/ribitol dehydrogenase             | -9.03 |
| Mtr.32317.1.S1_s_at | Phototropin                               | -9.03 |
| Mtr.39210.1.S1_at   | Hypothetical protein                      | -9.02 |
| Mtr.24535.1.S1_at   | Peroxidase                                | -9.02 |
| Mtr.20636.1.S1_at   | NAD-dependent epimerase/dehydratase       | -9.01 |
| Mtr.3101.1.S1_at    | Hypothetical protein                      | -9.00 |
| Mtr.12401.1.S1_s_at | Myb-related transcription factor MYB59    | -9.00 |
| Mtr.20579.1.S1_at   | Hypothetical protein                      | -9.00 |
| Mtr.1753.1.S1_at    | Hypothetical protein                      | -9.00 |
| Mtr.19422.1.S1_at   | ParB-like nuclease                        | -8.98 |
| Mtr.1762.1.S1_at    | Plastid RNA polymerase sigma-subunit      | -8.97 |
| Mtr.9853.1.S1_at    | Hypothetical protein                      | -8.93 |
| Mtr.6033.1.S1_at    | Peroxidase                                | -8.93 |
| Mtr.9805.1.S1_at    | Hypothetical protein                      | -8.93 |
| Mtr.25510.1.S1_at   | Glycosyl hydrolase                        | -8.92 |
| Mtr.13189.1.S1_at   | Hypothetical protein                      | -8.92 |
| Mtr.31727.1.S1_at   | Hypothetical protein                      | -8.91 |
| Mtr.11529.1.S1_at   | SOUL heme-binding protein                 | -8.90 |
| Mtr.12358.1.S1_at   | Seed maturation protein LEA 4             | -8.90 |
| Mtr.13388.1.S1_s_at | Hypothetical protein                      | -8.89 |
| Mtr.3071.1.S1_at    | Starch synthase, isoform V                | -8.88 |
| Mtr.28757.1.S1_at   | Hypothetical protein                      | -8.87 |
| Mtr.41157.1.S1_at   | RAC-like GTP binding protein RAC13        | -8.86 |
| Mtr.44855.1.S1_at   | Uroporphyrin III methylase                | -8.86 |
| Mtr.16226.1.S1_at   | Serine/threonine protein kinase           | -8.86 |
| Mtr.11271.1.S1_at   | Hypothetical protein                      | -8.85 |
| Mtr.26124.1.S1_at   | Hypothetical protein                      | -8.83 |
| Mtr.50015.1.S1_s_at | Hypothetical protein                      | -8.83 |
| Mtr.27107.1.S1_at   | MYC1                                      | -8.82 |
| Mtr.13979.1.S1_at   | Lipid transfer protein                    | -8.81 |
| Mtr.41622.1.S1_at   | Hypothetical protein                      | -8.80 |
| Mtr.33844.1.S1_s_at | Allantoinase                              | -8.79 |
| Mtr.15414.1.S1_at   | Hypothetical protein                      | -8.78 |
| Mtr.40514.1.S1_at   | Ultraviolet-B-repressible protein         | -8.77 |
| Mtr.12349.1.S1_at   | Hypothetical protein                      | -8.77 |
| Mtr.42164.1.S1_at   | Hypothetical protein                      | -8.76 |
| Mtr.5954.1.S1_at    | ABC transporter                           | -8.76 |
| Mtr.6070.1.S1_at    | Histidine kinase                          | -8.75 |
| Mtr.20727.1.S1_at   | Aldehyde dehydrogenase                    | -8.75 |
| Mtr.42672.1.S1_at   | Hypothetical protein                      | -8.74 |
| Mtr.47758.1.S1_at   | bHLH protein                              | -8.74 |
| Mtr.12848.1.S1_at   | Berberine bridge enzyme-like protein      | -8.73 |
| Mtr.40872.1.S1_at   | Hypothetical protein                      | -8.73 |
| Mtr.38476.1.S1_at   | Cytochrome c                              | -8.72 |
| Msa.3002.1.S1_at    | Hypothetical protein                      | -8.71 |
| Mtr.43633.1.S1_at   | Hypothetical protein                      | -8.68 |

|                     |                                              |       |
|---------------------|----------------------------------------------|-------|
| Mtr.47369.1.S1_s_at | ABC transporter                              | -8.68 |
| Mtr.38596.1.S1_at   | Amine oxidase                                | -8.67 |
| Mtr.49461.1.S1_at   | Hypothetical protein                         | -8.66 |
| Mtr.12042.1.S1_at   | Farnesylated protein AFTP6-like protein      | -8.66 |
| Mtr.39530.1.S1_at   | Hypothetical protein                         | -8.66 |
| Mtr.37322.1.S1_at   | Hypothetical protein                         | -8.65 |
| Mtr.15289.1.S1_at   | Lipoxygenase                                 | -8.64 |
| Mtr.18020.1.S1_at   | Hypothetical protein                         | -8.64 |
| Mtr.30739.1.S1_s_at | Hypothetical protein                         | -8.64 |
| Mtr.37552.1.S1_at   | RNA- or ssDNA-binding protein                | -8.62 |
| Mtr.15971.1.S1_at   | Glycine cleavage T protein                   | -8.62 |
| Mtr.13951.1.S1_at   | Hypothetical protein                         | -8.61 |
| Msa.1776.1.S1_at    | Hypothetical protein                         | -8.60 |
| Mtr.40706.1.S1_s_at | ADP-glucose pyrophosphorylase large subunit  | -8.60 |
| Mtr.18237.1.S1_at   | Hypothetical protein                         | -8.60 |
| Mtr.7832.1.S1_at    | Hypothetical protein                         | -8.60 |
| Mtr.41918.1.S1_at   | Hypothetical protein                         | -8.59 |
| Mtr.16218.1.S1_s_at | AAA ATPase                                   | -8.58 |
| Mtr.42933.1.S1_x_at | Nonspecific lipid-transfer protein precursor | -8.57 |
| Mtr.31487.1.S1_s_at | Agmatine Iminohydrolase                      | -8.56 |
| Mtr.37274.1.S1_at   | Aquaporin 2                                  | -8.55 |
| Mtr.11741.1.S1_at   | Hydrolase                                    | -8.54 |
| Mtr.44282.1.S1_at   | THA4 protein                                 | -8.54 |
| Msa.2653.1.S1_at    | Hypothetical protein                         | -8.53 |
| Mtr.52214.1.S1_at   | SOUL heme-binding protein                    | -8.53 |
| Mtr.35532.1.S1_at   | Bg55 protein                                 | -8.53 |
| Mtr.35625.1.S1_s_at | Hypothetical protein                         | -8.52 |
| Msa.925.1.S1_at     | Hypothetical protein                         | -8.52 |
| Mtr.33903.1.S1_s_at | GTP-binding protein TypA                     | -8.51 |
| Mtr.51379.1.S1_at   | bHLH protein                                 | -8.51 |
| Mtr.31299.1.S1_at   | MYB transcription factor                     | -8.51 |
| Msa.1741.1.S1_at    | Hypothetical protein                         | -8.50 |
| Mtr.33055.1.S1_s_at | Hypothetical protein                         | -8.50 |
| Mtr.39163.1.S1_at   | Hypothetical protein                         | -8.47 |
| Mtr.45049.1.S1_at   | Hypothetical protein                         | -8.46 |
| Mtr.51752.1.S1_at   | Short-chain dehydrogenase/reductase          | -8.45 |
| Mtr.41047.1.S1_at   | Hypothetical protein                         | -8.44 |
| Mtr.41151.1.S1_s_at | Cer2 protein                                 | -8.44 |
| Mtr.52185.1.S1_at   | Hypothetical protein                         | -8.44 |
| Msa.1766.1.S1_at    | Hypothetical protein                         | -8.43 |
| Mtr.34697.1.S1_at   | THA4 protein                                 | -8.43 |
| Mtr.41573.1.S1_at   | Double C2-like domain containing protein     | -8.43 |
| Mtr.29529.1.S1_at   | Hypothetical protein                         | -8.42 |
| Mtr.33889.1.S1_at   | CER1 protein                                 | -8.42 |
| Mtr.44782.1.S1_at   | Hypothetical protein                         | -8.41 |
| Mtr.12899.1.S1_at   | Hypothetical protein                         | -8.41 |
| Mtr.18280.1.S1_at   | Serine/threonine protein kinase              | -8.39 |
| Mtr.27055.1.S1_at   | Plastid RNA polymerase sigma-subunit         | -8.38 |
| Mtr.34879.1.S1_at   | Hypothetical protein                         | -8.38 |
| Mtr.49684.1.S1_at   | UDP-glucose glucosyltransferase              | -8.37 |
| Mtr.39289.1.S1_at   | Flavonoid 1-2 rhamnosyltransferase           | -8.36 |
| Mtr.13575.1.S1_at   | Hypothetical protein                         | -8.36 |
| Mtr.35488.1.S1_at   | Hypothetical protein                         | -8.35 |
| Mtr.37767.1.S1_at   | Hypothetical protein                         | -8.34 |

|                     |                                                 |       |
|---------------------|-------------------------------------------------|-------|
| Mtr.34167.1.S1_at   | Hypothetical protein                            | -8.33 |
| Mtr.20229.1.S1_at   | UDP-glucose:anthocyanin 5-O-glucosyltransferase | -8.33 |
| Mtr.43132.1.S1_at   | Chloroplast nucleoid DNA binding protein        | -8.32 |
| Mtr.9534.1.S1_at    | Hypothetical protein                            | -8.31 |
| Mtr.38019.1.S1_at   | Lil3 protein                                    | -8.29 |
| Mtr.31623.1.S1_at   | Hypothetical protein                            | -8.28 |
| Mtr.9529.1.S1_at    | Hypothetical protein                            | -8.28 |
| Mtr.2990.1.S1_at    | Metal resistance protein                        | -8.27 |
| Mtr.38481.1.S1_at   | Hypothetical protein                            | -8.26 |
| Mtr.34485.1.S1_at   | Hypothetical protein                            | -8.24 |
| Mtr.45476.1.S1_at   | Metal-transporting P-type ATPase                | -8.24 |
| Mtr.41624.1.S1_at   | SEC14 cytosolic factor                          | -8.23 |
| Mtr.23945.1.S1_at   | Receptor-like kinase                            | -8.22 |
| Mtr.14257.1.S1_at   | Magnesium-protoporphyrin IX methyltransferase   | -8.21 |
| Mtr.44524.1.S1_at   | Hypothetical protein                            | -8.18 |
| Mtr.42733.1.S1_at   | Histone H1                                      | -8.18 |
| Mtr.12555.1.S1_at   | Alpha-glucan phosphorylase                      | -8.18 |
| Mtr.45371.1.S1_at   | Small signal peptidase                          | -8.17 |
| Mtr.37811.1.S1_at   | Hypothetical protein                            | -8.16 |
| Mtr.6746.1.S1_at    | LEM3 (Ligand-effect modulator 3)                | -8.16 |
| Mtr.7160.1.S1_at    | MRP-like ABC transporter                        | -8.16 |
| Mtr.44745.1.S1_at   | Ferredoxin                                      | -8.15 |
| Mtr.24695.1.S1_at   | NADH dehydrogenase                              | -8.15 |
| Mtr.30722.1.S1_at   | Hypothetical protein                            | -8.15 |
| Mtr.32947.1.S1_at   | Hypothetical protein                            | -8.12 |
| Mtr.9616.1.S1_at    | Hypothetical protein                            | -8.12 |
| Mtr.34597.1.S1_s_at | Hypothetical protein                            | -8.12 |
| Mtr.49583.1.S1_at   | Glycoside hydrolase                             | -8.12 |
| Mtr.12989.1.S1_at   | Fructosamine-3-kinase                           | -8.11 |
| Mtr.27403.1.S1_at   | Hypothetical protein                            | -8.11 |
| Mtr.9264.1.S1_at    | Hypothetical protein                            | -8.10 |
| Mtr.38747.1.S1_s_at | Sugar transporter                               | -8.09 |
| Mtr.47933.1.S1_at   | Amino acid transporter a                        | -8.08 |
| Mtr.41565.1.S1_s_at | Hypothetical protein                            | -8.07 |
| Mtr.19479.1.S1_at   | Glutaredoxin                                    | -8.07 |
| Mtr.43087.1.S1_at   | Pectin methylesterase                           | -8.06 |
| Mtr.25320.1.S1_at   | Hypothetical protein                            | -8.04 |
| Mtr.40480.1.S1_at   | Allantoinase                                    | -8.02 |
| Mtr.14192.1.S1_at   | Inositol monophosphatase                        | -8.02 |
| Mtr.4818.1.S1_s_at  | Glutamine synthetase                            | -8.01 |
| Mtr.4048.1.S1_at    | Hypothetical protein                            | -8.00 |
| Mtr.24591.1.S1_at   | Hypothetical protein                            | -8.00 |
| Mtr.44672.1.S1_at   | Glutathione S-transferase GST 7                 | -7.99 |
| Mtr.38938.1.S1_at   | Hypothetical protein                            | -7.99 |
| Mtr.13969.1.S1_at   | Glucosyltransferase                             | -7.96 |
| Mtr.15811.1.S1_at   | Hypothetical protein                            | -7.96 |
| Mtr.38983.1.S1_at   | Hypothetical protein                            | -7.96 |
| Mtr.45956.1.S1_at   | Lipase/lipoxygenase                             | -7.96 |
| Mtr.18021.1.S1_at   | Hypothetical protein                            | -7.96 |
| Mtr.21518.1.S1_s_at | Cytochrome P450                                 | -7.96 |
| Mtr.26161.1.S1_at   | Peroxisomal membrane protein                    | -7.95 |
| Mtr.45562.1.S1_at   | Nuclear shuttle interacting protein             | -7.95 |
| Msa.2667.1.S1_at    | Hypothetical protein                            | -7.95 |
| Mtr.32681.1.S1_at   | Hypothetical protein                            | -7.94 |



|                     |                                                              |       |
|---------------------|--------------------------------------------------------------|-------|
| Mtr.52193.1.S1_at   | Glycoside hydrolase                                          | -7.94 |
| Mtr.35142.1.S1_at   | Hypothetical protein                                         | -7.92 |
| Mtr.27269.1.S1_at   | Hypothetical protein                                         | -7.91 |
| Mtr.32683.1.S1_at   | TPR-containing protein                                       | -7.91 |
| Mtr.24912.1.S1_at   | Hypothetical protein                                         | -7.91 |
| Mtr.10207.1.S1_at   | Early E3 20.6 kDa glycoprotein                               | -7.90 |
| Mtr.44090.1.S1_at   | Hypothetical protein                                         | -7.90 |
| Mtr.13014.1.S1_at   | Amine oxidase                                                | -7.90 |
| Mtr.33357.1.S1_at   | MutT domain protein                                          | -7.89 |
| Mtr.49787.1.S1_s_at | Glycosyl hydrolases family 17                                | -7.88 |
| Mtr.47226.1.S1_at   | CBL-interacting protein kinase 1                             | -7.88 |
| Msa.1763.1.S1_at    | Hypothetical protein                                         | -7.87 |
| Msa.2712.1.S1_at    | Hypothetical protein                                         | -7.86 |
| Mtr.31119.1.S1_at   | MRP-like ABC transporter                                     | -7.85 |
| Mtr.5357.1.S1_at    | ABC transporter                                              | -7.84 |
| Msa.1528.1.S1_at    | Hypothetical protein                                         | -7.84 |
| Mtr.23616.1.S1_at   | DNA-binding protein 4                                        | -7.84 |
| Mtr.37745.1.S1_at   | Hypothetical protein                                         | -7.82 |
| Mtr.38080.1.S1_at   | Hypothetical protein                                         | -7.82 |
| Mtr.33613.1.S1_at   | Hypothetical protein                                         | -7.82 |
| Mtr.34610.1.S1_at   | Hypothetical protein                                         | -7.79 |
| Mtr.28639.1.S1_at   | Acetolactate synthase                                        | -7.79 |
| Mtr.22801.1.S1_at   | Polynucleotide phosphorylase                                 | -7.78 |
| Mtr.43749.1.S1_s_at | Hypothetical protein                                         | -7.77 |
| Mtr.17798.1.S1_at   | GNS1/SUR4 membrane protein                                   | -7.76 |
| Mtr.5962.1.S1_s_at  | Nonspecific lipid-transfer protein                           | -7.75 |
| Mtr.8917.1.S1_at    | Dehydrogenase-like protein                                   | -7.75 |
| Mtr.11408.1.S1_at   | Hypothetical protein                                         | -7.72 |
| Mtr.41412.1.S1_at   | Thylakoid lumenal 18 kDa protein                             | -7.72 |
| Mtr.31750.1.S1_at   | Sulfate transporter 3.4                                      | -7.71 |
| Mtr.11363.1.S1_at   | Glycosyltransferase                                          | -7.70 |
| Mtr.8497.1.S1_at    | PSI light-harvesting antenna chlorophyll a/b-binding protein | -7.70 |
| Mtr.45313.1.S1_at   | Multidrug resistance-associated protein 2                    | -7.69 |
| Mtr.38693.1.S1_at   | Hypothetical protein                                         | -7.69 |
| Mtr.2111.1.S1_at    | Hypothetical protein                                         | -7.67 |
| Mtr.48501.1.S1_at   | Leucine-rich repeat                                          | -7.66 |
| Mtr.20946.1.S1_at   | Serine/threonine protein kinase                              | -7.65 |
| Mtr.15409.1.S1_at   | Protein prenyltransferase                                    | -7.64 |
| Mtr.42509.1.S1_at   | Hypothetical protein                                         | -7.63 |
| Mtr.41659.1.S1_at   | Chloroplast carotenoid epsilon-ring hydroxylase              | -7.63 |
| Mtr.8659.1.S1_s_at  | Beta-galactosidase                                           | -7.63 |
| Mtr.6086.1.S1_s_at  | Sesquiterpene cyclase                                        | -7.60 |
| Mtr.8754.1.S1_at    | Rhodanese-like family protein                                | -7.59 |
| Mtr.40991.1.S1_at   | Limonoid UDP-glucosyltransferase                             | -7.59 |
| Mtr.43091.1.S1_s_at | Seed maturation protein LEA 4                                | -7.59 |
| Mtr.8420.1.S1_at    | Hypothetical protein                                         | -7.59 |
| Mtr.18790.1.S1_at   | Esterase/lipase/thioesterase                                 | -7.59 |
| Mtr.49627.1.S1_at   | Hypothetical protein                                         | -7.54 |
| Mtr.28644.1.S1_at   | Cytokinin receptor, partial (26%)                            | -7.53 |
| Mtr.13528.1.S1_at   | Anthranilate N-hydroxycinnamoyl/benzoyltransferase           | -7.52 |
| Mtr.31331.1.S1_s_at | Hypothetical protein                                         | -7.52 |
| Mtr.47706.1.S1_at   | Myb family transcription factor                              | -7.50 |
| Mtr.27397.1.S1_at   | Hypothetical protein                                         | -7.50 |
| Mtr.5638.1.S1_at    | Hypothetical protein                                         | -7.50 |

|                     |                                                                   |       |
|---------------------|-------------------------------------------------------------------|-------|
| Mtr.24075.1.S1_at   | Mannitol dehydrogenase                                            | -7.50 |
| Mtr.38608.1.S1_at   | Hypothetical protein                                              | -7.49 |
| Msa.2926.1.S1_s_at  | Hypothetical protein                                              | -7.47 |
| Msa.3149.1.S1_at    | Hypothetical protein                                              | -7.47 |
| Mtr.11816.1.S1_at   | Hypothetical protein                                              | -7.46 |
| Mtr.39315.1.S1_s_at | Hypothetical protein                                              | -7.45 |
| Mtr.41227.1.S1_at   | Germacrene D synthase                                             | -7.45 |
| Mtr.27368.1.S1_at   | Hypothetical protein                                              | -7.45 |
| Mtr.12037.1.S1_at   | Hypothetical protein                                              | -7.44 |
| Mtr.33686.1.S1_at   | Hypothetical protein                                              | -7.44 |
| Msa.1574.1.S1_at    | Hypothetical protein                                              | -7.42 |
| Msa.1022.1.S1_at    | Hypothetical protein                                              | -7.42 |
| Mtr.20207.1.S1_at   | Thioredoxin                                                       | -7.42 |
| Mtr.1715.1.S1_at    | Aminoalcoholphosphotransferase                                    | -7.42 |
| Mtr.38746.1.S1_at   | Heat shock transcription factor                                   | -7.41 |
| Msa.3097.1.S1_at    | Hypothetical protein                                              | -7.41 |
| Mtr.11536.1.S1_at   | SOS2-like protein kinase PKS3                                     | -7.41 |
| Mtr.8426.1.S1_at    | Chlorophyll a/b binding protein                                   | -7.41 |
| Mtr.43744.1.S1_at   | Hypothetical protein                                              | -7.40 |
| Mtr.50904.1.S1_at   | Hypothetical protein                                              | -7.39 |
| Mtr.1911.1.S1_s_at  | Hypothetical protein                                              | -7.39 |
| Mtr.11025.1.S1_at   | Hypothetical protein                                              | -7.39 |
| Mtr.22990.1.S1_at   | Receptor-like protein kinase 1                                    | -7.39 |
| Mtr.10887.1.S1_at   | Hypothetical protein                                              | -7.38 |
| Mtr.10136.1.S1_at   | Hypothetical protein                                              | -7.37 |
| Mtr.43079.1.S1_at   | Farnesyl-diphosphate farnesyltransferase                          | -7.36 |
| Mtr.43748.1.S1_s_at | Hypothetical protein                                              | -7.35 |
| Mtr.15484.1.S1_at   | Peroxidase                                                        | -7.35 |
| Mtr.37982.1.S1_at   | Twist related protein 1                                           | -7.34 |
| Mtr.48911.1.S1_at   | Short-chain dehydrogenase/reductase                               | -7.34 |
| Mtr.38647.1.S1_at   | WAK-like kinase                                                   | -7.34 |
| Mtr.33894.1.S1_at   | Tetracycline transporter protein                                  | -7.33 |
| Mtr.38441.1.S1_at   | Hypothetical protein                                              | -7.33 |
| Mtr.17358.1.S1_at   | Protein synthesis factor                                          | -7.32 |
| Mtr.1036.1.S1_at    | Non-phototropic hypocotyl 3                                       | -7.32 |
| Mtr.48723.1.S1_at   | Hypothetical protein                                              | -7.32 |
| Mtr.20794.1.S1_at   | Plant lipid transfer/seed storage/trypsin-alpha amylase inhibitor | -7.30 |
| Mtr.38066.1.S1_at   | Cinnamyl alcohol dehydrogenase                                    | -7.30 |
| Mtr.9169.1.S1_at    | Hypothetical protein                                              | -7.29 |
| Mtr.44847.1.S1_s_at | Glycosyltransferase family protein 47                             | -7.29 |
| Mtr.11562.1.S1_at   | Diphosphonucleotide phosphatase 1                                 | -7.27 |
| Mtr.37927.1.S1_at   | Hypothetical protein                                              | -7.27 |
| Mtr.5313.1.S1_s_at  | Hypothetical protein                                              | -7.27 |
| Mtr.17735.1.S1_at   | Hypothetical protein                                              | -7.25 |
| Msa.2847.1.S1_at    | Hypothetical protein                                              | -7.23 |
| Mtr.40963.1.S1_at   | En/Spm-like transposon protein                                    | -7.23 |
| Mtr.43359.1.S1_at   | Phytochelatin synthetase                                          | -7.22 |
| Mtr.22096.1.S1_at   | EIX receptor 1                                                    | -7.22 |
| Mtr.762.1.S1_at     | Hypothetical protein                                              | -7.21 |
| Msa.1122.1.S1_at    | Hypothetical protein                                              | -7.21 |
| Mtr.9163.1.S1_at    | Hypothetical protein                                              | -7.21 |
| Mtr.23402.1.S1_at   | Aldehyde dehydrogenase                                            | -7.20 |
| Mtr.13420.1.S1_at   | Selenium-binding protein                                          | -7.19 |
| Mtr.52183.1.S1_at   | Concanavalin A-like lectin/glucanase                              | -7.19 |

|                     |                                                           |       |
|---------------------|-----------------------------------------------------------|-------|
| Mtr.3858.1.S1_at    | Leucoanthocyanidin dioxygenase                            | -7.18 |
| Mtr.16579.1.S1_x_at | Cytochrome P450                                           | -7.18 |
| Mtr.13533.1.S1_at   | Hypothetical protein                                      | -7.18 |
| Mtr.51909.1.S1_at   | Phenylalanine/histidine ammonia-lyase                     | -7.16 |
| Mtr.40676.1.S1_at   | Chloroplast nucleoid DNA binding protein                  | -7.14 |
| Mtr.38021.1.S1_at   | Hypothetical protein                                      | -7.13 |
| Mtr.50756.1.S1_at   | Hypothetical protein                                      | -7.13 |
| Mtr.18798.1.S1_at   | Proteinase inhibitor I3                                   | -7.12 |
| Msa.1561.1.S1_at    | Hypothetical protein                                      | -7.12 |
| Mtr.44836.1.S1_at   | Hypothetical protein                                      | -7.12 |
| Mtr.15420.1.S1_at   | ABC transporter                                           | -7.11 |
| Mtr.32661.1.S1_at   | Hypothetical protein                                      | -7.10 |
| Mtr.40684.1.S1_at   | Anthocyanin 5-aromatic acyltransferase/benzoyltransferase | -7.10 |
| Mtr.13801.1.S1_at   | Hypothetical protein                                      | -7.10 |
| Mtr.40975.1.S1_at   | Nitrite transport protein                                 | -7.09 |
| Mtr.44860.1.S1_at   | MADS5 protein                                             | -7.09 |
| Mtr.27111.1.S1_at   | GTPase engC protein 1                                     | -7.08 |
| Msa.1517.1.S1_at    | Hypothetical protein                                      | -7.08 |
| Mtr.32044.1.S1_at   | Hypothetical protein                                      | -7.08 |
| Mtr.11016.1.S1_at   | Hypothetical protein                                      | -7.08 |
| Mtr.13397.1.S1_at   | Regulator of chromosome condensation-like protein         | -7.07 |
| Mtr.34803.1.S1_at   | Multidrug resistance-associated protein                   | -7.07 |
| Mtr.16311.1.S1_at   | Hypothetical protein                                      | -7.07 |
| Mtr.30437.1.S1_at   | Hypothetical protein                                      | -7.07 |
| Mtr.31764.1.S1_at   | Alpha-mannosidase                                         | -7.06 |
| Msa.1177.1.S1_at    | Hypothetical protein                                      | -7.05 |
| Mtr.42492.1.S1_at   | Carboxylesterase-like protein                             | -7.05 |
| Mtr.32983.1.S1_at   | Protein kinase                                            | -7.04 |
| Mtr.13614.1.S1_at   | Pyrimidine 5'-nucleotidase                                | -7.04 |
| Mtr.10595.1.S1_s_at | Seed maturation protein PM36                              | -7.02 |
| Mtr.41215.1.S1_at   | Germin-like protein                                       | -7.00 |
| Mtr.32475.1.S1_s_at | Hypothetical protein                                      | -7.00 |
| Mtr.19777.1.S1_at   | Hypothetical protein                                      | -7.00 |
| Mtr.9808.1.S1_at    | Hypothetical protein                                      | -6.99 |
| Mtr.13167.1.S1_at   | Acyl CoA synthetase                                       | -6.98 |
| Mtr.5330.1.S1_at    | Serine /threonine protein kinase                          | -6.98 |
| Msa.1845.1.S1_at    | Hypothetical protein                                      | -6.98 |
| Mtr.50932.1.S1_at   | Myb, DNA-binding                                          | -6.97 |
| Mtr.13851.1.S1_at   | Hypothetical protein                                      | -6.95 |
| Mtr.48535.1.S1_at   | Hypothetical protein                                      | -6.94 |
| Mtr.34826.1.S1_at   | Hypothetical protein                                      | -6.94 |
| Mtr.41481.1.S1_at   | Phosphate translocator                                    | -6.94 |
| Mtr.35957.1.S1_at   | Germin-like protein                                       | -6.94 |
| Mtr.38165.1.S1_at   | Serine/threonine protein kinase                           | -6.94 |
| Mtr.11495.1.S1_at   | Steroid 5alpha-reductase                                  | -6.93 |
| Mtr.45389.1.S1_at   | Hypothetical protein                                      | -6.92 |
| Mtr.12039.1.S1_at   | Peptide transporter 1                                     | -6.91 |
| Mtr.11929.1.S1_at   | Beta-1,4-xylosidase                                       | -6.90 |
| Mtr.34815.1.S1_at   | Hypothetical protein                                      | -6.90 |
| Mtr.11148.1.S1_at   | Multi resistance protein                                  | -6.88 |
| Mtr.42374.1.S1_at   | Hypothetical protein                                      | -6.88 |
| Mtr.39387.1.S1_s_at | DCL protein                                               | -6.88 |
| Msa.1890.1.S1_at    | Hypothetical protein                                      | -6.87 |
| Mtr.38446.1.S1_s_at | Ferredoxin-thioredoxin reductase catalytic chain          | -6.86 |

|                     |                                              |       |
|---------------------|----------------------------------------------|-------|
| Mtr.8968.1.S1_at    | Hypothetical protein                         | -6.86 |
| Mtr.41414.1.S1_at   | Hypothetical protein                         | -6.86 |
| Mtr.34752.1.S1_s_at | Hypothetical protein                         | -6.86 |
| Mtr.7101.1.S1_at    | C2H2 zinc-finger protein                     | -6.85 |
| Mtr.15042.1.S1_at   | Histidine kinase A                           | -6.85 |
| Mtr.8683.1.S1_at    | Phosphoenolpyruvate carboxylase              | -6.85 |
| Msa.1062.1.S1_at    | Hypothetical protein                         | -6.85 |
| Mtr.42902.1.S1_at   | VuP5CS protein                               | -6.85 |
| Mtr.23946.1.S1_at   | Receptor kinase LRK10                        | -6.84 |
| Mtr.20268.1.S1_at   | Hypothetical protein                         | -6.83 |
| Mtr.35540.1.S1_at   | Hypothetical protein                         | -6.83 |
| Mtr.11988.1.S1_at   | Tryptophanyl-tRNA synthetase                 | -6.83 |
| Mtr.38595.1.S1_at   | Hypothetical protein                         | -6.82 |
| Mtr.10331.1.S1_at   | Orcinol O-methyltransferase                  | -6.82 |
| Mtr.11829.1.S1_at   | Hypothetical protein                         | -6.82 |
| Mtr.40897.1.S1_at   | Hypothetical protein                         | -6.81 |
| Msa.900.1.S1_s_at   | Hypothetical protein                         | -6.81 |
| Mtr.26278.1.S1_s_at | Pyrroline-5-carboxylate reductase            | -6.81 |
| Mtr.46046.1.S1_at   | Lipolytic enzyme                             | -6.81 |
| Mtr.32540.1.S1_at   | Hypothetical protein                         | -6.81 |
| Mtr.11421.1.S1_at   | Ripening-related protein                     | -6.81 |
| Mtr.40775.1.S1_at   | Protein tyrosine phosphatase                 | -6.80 |
| Mtr.40473.1.S1_at   | Lipid transfer protein                       | -6.80 |
| Mtr.634.1.S1_at     | Hypothetical protein                         | -6.79 |
| Mtr.39482.1.S1_at   | Hypothetical protein                         | -6.79 |
| Mtr.37673.1.S1_at   | Hypothetical protein                         | -6.78 |
| Mtr.42445.1.S1_at   | Hypothetical protein                         | -6.78 |
| Mtr.6035.1.S1_at    | UDP-glycosyltransferase 74G1                 | -6.78 |
| Mtr.37448.1.S1_at   | Photosystem II                               | -6.77 |
| Mtr.28667.1.S1_at   | Hypothetical protein                         | -6.77 |
| Mtr.9876.1.S1_at    | CCAAT-binding transcription factor subunit C | -6.77 |
| Mtr.39530.1.S1_s_at | Hypothetical protein                         | -6.77 |
| Mtr.21518.1.S1_at   | Cytochrome P450                              | -6.76 |
| Msa.1654.1.S1_at    | Hypothetical protein                         | -6.76 |
| Mtr.22041.1.S1_at   | Hypothetical protein                         | -6.76 |
| Mtr.47780.1.S1_at   | Expansin                                     | -6.75 |
| Mtr.8777.1.S1_at    | Plastoglobule associated protein PG1         | -6.75 |
| Mtr.37443.1.S1_at   | Alcohol dehydrogenase 1                      | -6.75 |
| Mtr.5850.1.S1_at    | Protein kinase                               | -6.74 |
| Mtr.7068.1.S1_at    | Threonyl-tRNA synthetase                     | -6.74 |
| Mtr.41485.1.S1_at   | Dynammin-like protein                        | -6.73 |
| Mtr.29286.1.S1_at   | 22 kDa peroxisomal membrane protein          | -6.73 |
| Mtr.9810.1.S1_at    | Hypothetical protein                         | -6.72 |
| Msa.1665.1.S1_at    | Hypothetical protein                         | -6.72 |
| Mtr.3805.1.S1_at    | Laccase                                      | -6.70 |
| Msa.1462.1.S1_at    | Hypothetical protein                         | -6.70 |
| Msa.3140.1.S1_at    | Hypothetical protein                         | -6.70 |
| Mtr.37361.1.S1_at   | Chlorophyll a-b binding protein CP29.3       | -6.69 |
| Mtr.10011.1.S1_at   | Hypothetical protein                         | -6.69 |
| Mtr.27915.1.S1_at   | Hypothetical protein                         | -6.68 |
| Mtr.42608.1.S1_at   | Polysaccharide polymerase                    | -6.68 |
| Mtr.48754.1.S1_at   | Dihydrodipicolinate reductase                | -6.67 |
| Mtr.31137.1.S1_at   | Hypothetical protein                         | -6.67 |
| Mtr.40327.1.S1_at   | ADP-glucose pyrophosphorylase                | -6.67 |

|                     |                                                         |       |
|---------------------|---------------------------------------------------------|-------|
| Mtr.27314.1.S1_s_at | Heat shock transcription factor                         | -6.66 |
| Mtr.39477.1.S1_at   | Myosin-like protein                                     | -6.66 |
| Mtr.10936.1.S1_at   | Transcriptional regulator, LysR                         | -6.66 |
| Mtr.9717.1.S1_at    | WAK-like kinase                                         | -6.65 |
| Mtr.16086.1.S1_at   | Hypothetical protein                                    | -6.65 |
| Mtr.13413.1.S1_at   | Transporter like protein                                | -6.64 |
| Mtr.10825.1.S1_at   | Hypothetical protein                                    | -6.64 |
| Mtr.27223.1.S1_s_at | Hypothetical protein                                    | -6.63 |
| Mtr.29276.1.S1_s_at | Hypothetical protein                                    | -6.62 |
| Mtr.6729.1.S1_at    | Hypothetical protein                                    | -6.62 |
| Mtr.44017.1.S1_at   | Seed maturation protein PM24                            | -6.61 |
| Mtr.43727.1.S1_at   | Squalene monooxygenase 1                                | -6.60 |
| Mtr.34738.1.S1_s_at | Copper/zinc superoxide dismutase                        | -6.60 |
| Mtr.13401.1.S1_at   | Hypothetical protein                                    | -6.60 |
| Mtr.35600.1.S1_at   | Pyrroline-5-carboxylate reductase                       | -6.60 |
| Mtr.38254.1.S1_at   | Ubiquitin-conjugating enzyme                            | -6.59 |
| Mtr.32709.1.S1_at   | Hypothetical protein                                    | -6.59 |
| Mtr.24210.1.S1_at   | Hypothetical protein                                    | -6.59 |
| Mtr.40908.1.S1_at   | Ribosomal protein L6                                    | -6.59 |
| Mtr.21261.1.S1_s_at | Hypothetical protein                                    | -6.59 |
| Mtr.40715.1.S1_at   | Mercuric reductase                                      | -6.59 |
| Mtr.10767.1.S1_at   | Agmatine Iminohydrolase                                 | -6.58 |
| Mtr.15775.1.S1_at   | Glycoside hydrolase                                     | -6.58 |
| Mtr.37807.1.S1_at   | Transporter, LysE family                                | -6.57 |
| Mtr.16200.1.S1_at   | Esterase/lipase/thioesterase                            | -6.57 |
| Mtr.32795.1.S1_s_at | Hypothetical protein                                    | -6.57 |
| Mtr.43655.1.S1_at   | Glucosyltransferase                                     | -6.56 |
| Mtr.5404.1.S1_at    | Receptor protein kinase                                 | -6.55 |
| Mtr.43044.1.S1_at   | NADP-dependent glyceraldehyde-3-phosphate dehydrogenase | -6.55 |
| Mtr.44147.1.S1_at   | Lipid transfer protein                                  | -6.55 |
| Mtr.38410.1.S1_at   | bZIP50 protein                                          | -6.55 |
| Msa.1380.1.S1_at    | Hypothetical protein                                    | -6.54 |
| Msa.2613.1.S1_at    | Hypothetical protein                                    | -6.54 |
| Mtr.32796.1.S1_at   | Sodium transport protein                                | -6.54 |
| Mtr.44852.1.S1_at   | Glu-tRNA(Gln) amidotransferase subunit B                | -6.53 |
| Mtr.22277.1.S1_s_at | Hypothetical protein                                    | -6.53 |
| Mtr.43148.1.S1_at   | Myb-related transcription factor MYB59                  | -6.53 |
| Mtr.45291.1.S1_at   | Hypothetical protein                                    | -6.53 |
| Msa.3143.1.S1_at    | Hypothetical protein                                    | -6.52 |
| Mtr.38919.1.S1_at   | Hypothetical protein                                    | -6.51 |
| Mtr.42840.1.S1_at   | Germin-like protein                                     | -6.51 |
| Mtr.37352.1.S1_at   | Trypsin protein inhibitor 3                             | -6.50 |
| Mtr.40528.1.S1_s_at | Hypothetical protein                                    | -6.50 |
| Mtr.5847.1.S1_at    | Zinc finger protein 1                                   | -6.50 |
| Mtr.39369.1.S1_at   | 33 kd chloroplast ribonucleoprotein                     | -6.50 |
| Mtr.31169.1.S1_at   | Cytochrome P450                                         | -6.48 |
| Mtr.44868.1.S1_at   | Hypothetical protein                                    | -6.48 |
| Mtr.38054.1.S1_at   | Hypothetical protein                                    | -6.47 |
| Mtr.40987.1.S1_at   | Hypothetical protein                                    | -6.47 |
| Msa.3021.1.S1_at    | Hypothetical protein                                    | -6.47 |
| Mtr.48631.1.S1_at   | Major facilitator superfamily                           | -6.46 |
| Mtr.32386.1.S1_at   | Strubbelig receptor family 8                            | -6.46 |
| Mtr.33744.1.S1_s_at | Hypothetical protein                                    | -6.45 |
| Mtr.35696.1.S1_at   | Hypothetical protein                                    | -6.43 |

|                     |                                                         |       |
|---------------------|---------------------------------------------------------|-------|
| Mtr.12308.1.S1_at   | Photosystem I reaction center subunit psaK              | -6.43 |
| Mtr.5655.1.S1_s_at  | ADP-glucose pyrophosphorylase large subunit             | -6.41 |
| Mtr.12886.1.S1_at   | Hypothetical protein                                    | -6.41 |
| Mtr.47452.1.S1_at   | Cytochrome P450 81E1                                    | -6.41 |
| Mtr.12223.1.S1_at   | Hypothetical protein                                    | -6.41 |
| Mtr.46900.1.S1_at   | Hypothetical protein                                    | -6.40 |
| Mtr.13901.1.S1_at   | Hypothetical protein                                    | -6.39 |
| Mtr.37166.1.S1_at   | UDP-glucose:indole-3-acetate beta-D-glucosyltransferase | -6.39 |
| Msa.3011.1.S1_at    | Hypothetical protein                                    | -6.39 |
| Mtr.8759.1.S1_at    | Quinone reductase                                       | -6.39 |
| Mtr.40774.1.S1_s_at | Protein tyrosine phosphatase                            | -6.38 |
| Mtr.5351.1.S1_at    | Cuticle protein (Faceless pollen-1) (YORE-YORE protein) | -6.38 |
| Msa.2585.1.S1_at    | Hypothetical protein                                    | -6.37 |
| Mtr.6771.1.S1_s_at  | Hypothetical protein                                    | -6.37 |
| Mtr.6780.1.S1_at    | Starch synthase IVb precursor                           | -6.37 |
| Mtr.43889.1.S1_at   | Beta-1,3-glucanase-like protein                         | -6.36 |
| Mtr.14419.1.S1_s_at | Purple acid phosphatase                                 | -6.36 |
| Mtr.5586.1.S1_s_at  | Beta-carotene hydroxylase                               | -6.36 |
| Mtr.25043.1.S1_at   | Hypothetical protein                                    | -6.35 |
| Mtr.27146.1.S1_s_at | Cyclin-like protein                                     | -6.35 |
| Mtr.11359.1.S1_at   | Hypothetical protein                                    | -6.34 |
| Mtr.39748.1.S1_at   | Hypothetical protein                                    | -6.33 |
| Mtr.40506.1.S1_at   | Serine carboxypeptidase II                              | -6.33 |
| Mtr.42279.1.S1_at   | Protease Do-like 8                                      | -6.33 |
| Mtr.10393.1.S1_at   | Thiamin biosynthetic enzyme                             | -6.33 |
| Mtr.11795.1.S1_at   | Proline-rich protein                                    | -6.32 |
| Mtr.13021.1.S1_at   | Hypothetical protein                                    | -6.32 |
| Mtr.37929.1.S1_at   | Inositol phosphatase                                    | -6.31 |
| Mtr.13958.1.S1_at   | Beta-amylase                                            | -6.31 |
| Mtr.24418.1.S1_at   | Cytochrome P450                                         | -6.30 |
| Mtr.34896.1.S1_at   | Receptor-like protein kinase                            | -6.28 |
| Mtr.43622.1.S1_s_at | NADH dehydrogenase                                      | -6.27 |
| Msa.1751.1.S1_at    | Hypothetical protein                                    | -6.27 |
| Mtr.6500.1.S1_at    | Alcohol NADP+ oxidoreductase                            | -6.26 |
| Mtr.16200.1.S1_x_at | Esterase/lipase/thioesterase                            | -6.26 |
| Mtr.13436.1.S1_at   | Nodule-enhanced protein phosphatase type 2C             | -6.25 |
| Mtr.929.1.S1_at     | Hypothetical protein                                    | -6.25 |
| Mtr.4862.1.S1_at    | Oxidoreductase                                          | -6.24 |
| Mtr.13612.1.S1_at   | Hypothetical protein                                    | -6.24 |
| Mtr.33045.1.S1_at   | Hypothetical protein                                    | -6.23 |
| Mtr.39390.1.S1_at   | Phosphoenolpyruvate carboxylase                         | -6.23 |
| Mtr.19940.1.S1_at   | Hypothetical protein                                    | -6.23 |
| Mtr.37443.1.S1_x_at | Alcohol dehydrogenase 1                                 | -6.22 |
| Mtr.39989.1.S1_at   | Hypothetical protein                                    | -6.22 |
| Msa.1642.1.S1_at    | Hypothetical protein                                    | -6.20 |
| Mtr.20560.1.S1_at   | Purple acid phosphatase                                 | -6.19 |
| Mtr.40152.1.S1_at   | Oxygen-evolving enhancer protein 2                      | -6.19 |
| Mtr.12418.1.S1_at   | Hypothetical protein                                    | -6.18 |
| Mtr.10423.1.S1_at   | Hypothetical protein                                    | -6.18 |
| Mtr.38672.1.S1_at   | Hypothetical protein                                    | -6.18 |
| Mtr.38436.1.S1_at   | Cyclin-like protein, partial (18%)                      | -6.17 |
| Mtr.43856.1.S1_at   | Protein kinase                                          | -6.17 |
| Mtr.51598.1.S1_at   | NUDIX hydrolase                                         | -6.16 |
| Mtr.33014.1.S1_s_at | Hypothetical protein                                    | -6.16 |

|                     |                                           |       |
|---------------------|-------------------------------------------|-------|
| Mtr.50974.1.S1_at   | Hypothetical protein                      | -6.16 |
| Mtr.45016.1.S1_at   | Hypothetical protein                      | -6.16 |
| Mtr.36140.1.S1_at   | Phosphoenolpyruvate carboxylase           | -6.15 |
| Mtr.5346.1.S1_at    | Receptor-like protein kinase 2            | -6.15 |
| Mtr.44131.1.S1_at   | Hypothetical protein                      | -6.15 |
| Mtr.8818.1.S1_at    | Hypothetical protein                      | -6.15 |
| Mtr.13232.1.S1_at   | Hypothetical protein                      | -6.15 |
| Mtr.25689.1.S1_at   | UDP-glucose 6-dehydrogenase               | -6.14 |
| Mtr.42240.1.S1_at   | Hypothetical protein                      | -6.14 |
| Mtr.22606.1.S1_at   | PPR repeat-containing protein             | -6.13 |
| Mtr.11999.1.S1_at   | Hypothetical protein                      | -6.13 |
| Mtr.40190.1.S1_at   | Flowering promoting factor-like 1         | -6.13 |
| Msa.1977.1.S1_at    | Hypothetical protein                      | -6.13 |
| Msa.1651.1.S1_at    | Hypothetical protein                      | -6.13 |
| Mtr.6878.1.S1_s_at  | Hypothetical protein                      | -6.12 |
| Mtr.12306.1.S1_at   | Hypothetical protein                      | -6.11 |
| Mtr.38379.1.S1_at   | Egr1 protein                              | -6.10 |
| Mtr.50307.1.S1_at   | Haloacid dehalogenase-like hydrolase      | -6.10 |
| Mtr.18997.1.S1_at   | IMGZn-finger, Dof type                    | -6.10 |
| Mtr.2640.1.S1_at    | Pullulanase-like protein                  | -6.09 |
| Mtr.36351.1.S1_at   | Cytochrome oxidase II                     | -6.08 |
| Mtr.16273.1.S1_at   | Proteinase inhibitor I12                  | -6.07 |
| Mtr.34447.1.S1_at   | Hypothetical protein                      | -6.07 |
| Mtr.45567.1.S1_at   | Fatty aldehyde dehydrogenase 1            | -6.07 |
| Mtr.43533.1.S1_at   | Maturation polypeptide                    | -6.07 |
| Mtr.6980.1.S1_at    | Multidrug resistance-associated protein 2 | -6.06 |
| Mtr.49627.1.S1_x_at | Hypothetical protein                      | -6.06 |
| Mtr.45060.1.S1_at   | Salt-tolerance protein                    | -6.06 |
| Mtr.16356.1.S1_s_at | Phospholipid/glycerol acyltransferase     | -6.06 |
| Mtr.33664.1.S1_at   | Ferredoxin-dependent glutamate synthase   | -6.06 |
| Mtr.18659.1.S1_s_at | Hly-III related proteins                  | -6.06 |
| Msa.1114.1.S1_at    | Hypothetical protein                      | -6.05 |
| Mtr.17661.1.S1_at   | Polyprenyl synthetase                     | -6.04 |
| Mtr.32411.1.S1_a_at | Hypothetical protein                      | -6.04 |
| Mtr.6081.1.S1_at    | Family II lipase EXL2                     | -6.04 |
| Mtr.9105.1.S1_at    | Coproporphyrinogen oxidase                | -6.02 |
| Mtr.36338.1.S1_at   | Hypothetical protein                      | -6.01 |
| Mtr.5714.1.S1_at    | Hypothetical protein                      | -6.01 |
| Mtr.43215.1.S1_at   | Hypothetical protein                      | -6.00 |
| Mtr.20947.1.S1_x_at | Serine/threonine protein kinase           | -5.99 |
| Mtr.18022.1.S1_at   | Hypothetical protein                      | -5.97 |
| Mtr.28068.1.S1_at   | Hypothetical protein                      | -5.96 |
| Mtr.41407.1.S1_at   | Hypothetical protein                      | -5.96 |
| Mtr.24061.1.S1_at   | Hypothetical protein                      | -5.96 |
| Mtr.32634.1.S1_s_at | Heat shock protein                        | -5.95 |
| Mtr.5115.1.S1_s_at  | Hypothetical protein                      | -5.95 |
| Msa.1661.1.S1_at    | Hypothetical protein                      | -5.95 |
| Msa.2137.1.S1_at    | Hypothetical protein                      | -5.95 |
| Msa.3118.1.S1_at    | Hypothetical protein                      | -5.94 |
| Msa.1921.1.S1_at    | Hypothetical protein                      | -5.93 |
| Mtr.50199.1.S1_at   | Hypothetical protein                      | -5.93 |
| Mtr.11440.1.S1_at   | Thylakoid lumenal 21.5 kDa protein        | -5.93 |
| Msa.1853.1.S1_at    | Hypothetical protein                      | -5.92 |
| Mtr.27754.1.S1_at   | Hypothetical protein                      | -5.92 |

|                     |                                                     |       |
|---------------------|-----------------------------------------------------|-------|
| Mtr.48197.1.S1_at   | Hypothetical protein                                | -5.92 |
| Mtr.13421.1.S1_at   | Cytochrome b-561                                    | -5.91 |
| Mtr.46510.1.S1_x_at | Alpha/beta-amyrin synthase                          | -5.91 |
| Mtr.20299.1.S1_at   | U box protein                                       | -5.91 |
| Msa.3191.1.S1_s_at  | Hypothetical protein                                | -5.91 |
| Mtr.45511.1.S1_at   | Histidine kinase                                    | -5.90 |
| Mtr.2611.1.S1_at    | Protein kinase                                      | -5.90 |
| Mtr.46957.1.S1_at   | Hypothetical protein                                | -5.89 |
| Mtr.37164.1.S1_at   | Heat shock factor RHSF6                             | -5.88 |
| Mtr.8567.1.S1_at    | Alcohol dehydrogenase 1                             | -5.87 |
| Mtr.9712.1.S1_at    | Copper/zinc superoxide dismutase                    | -5.87 |
| Mtr.7552.1.S1_at    | Hypothetical protein                                | -5.87 |
| Mtr.44223.1.S1_at   | Mitochondrial aspartate-glutamate carrier protein   | -5.87 |
| Mtr.19934.1.S1_at   | Cysteine proteinase                                 | -5.87 |
| Mtr.36469.1.S1_at   | Hypothetical protein                                | -5.87 |
| Mtr.2661.1.S1_at    | Hypothetical protein                                | -5.87 |
| Mtr.39373.1.S1_at   | Alanyl-tRNA synthetase                              | -5.86 |
| Mtr.43565.1.S1_at   | PAR-1b protein                                      | -5.86 |
| Mtr.33854.1.S1_at   | Hypothetical protein                                | -5.85 |
| Mtr.41274.1.S1_at   | Hypothetical protein                                | -5.84 |
| Mtr.13472.1.S1_at   | Interleukin-1 receptor-associated kinase-3 (IRAK-3) | -5.84 |
| Mtr.12907.1.S1_at   | Hypothetical protein                                | -5.83 |
| Mtr.13972.1.S1_at   | Thioredoxin m                                       | -5.83 |
| Mtr.37955.1.S1_at   | Hypothetical protein                                | -5.82 |
| Mtr.43749.1.S1_at   | Hypothetical protein                                | -5.82 |
| Mtr.34131.1.S1_at   | NADP dependent malic enzyme                         | -5.82 |
| Mtr.14527.1.S1_at   | Hypothetical protein                                | -5.82 |
| Mtr.15340.1.S1_at   | Malate dehydrogenase                                | -5.81 |
| Mtr.28309.1.S1_at   | Acyl-CoA thioesterase                               | -5.80 |
| Mtr.8967.1.S1_s_at  | Hypothetical protein                                | -5.80 |
| Mtr.34640.1.S1_at   | Hypothetical protein                                | -5.80 |
| Mtr.10293.1.S1_at   | Alanyl-tRNA synthetase                              | -5.79 |
| Mtr.32821.1.S1_at   | Hypothetical protein                                | -5.79 |
| Mtr.37341.1.S1_at   | Mannitol dehydrogenase                              | -5.78 |
| Mtr.31127.1.S1_s_at | ERD4 protein                                        | -5.78 |
| Mtr.49783.1.S1_at   | Glycosyl hydrolases family 17                       | -5.77 |
| Mtr.45269.1.S1_at   | NADP dependent malic enzyme                         | -5.77 |
| Mtr.47648.1.S1_at   | Hypothetical protein                                | -5.76 |
| Mtr.13200.1.S1_at   | Hypothetical protein                                | -5.76 |
| Mtr.6825.1.S1_at    | Hypothetical protein                                | -5.76 |
| Mtr.11542.1.S1_s_at | Hypothetical protein                                | -5.75 |
| Msa.1113.1.S1_at    | Hypothetical protein                                | -5.75 |
| Mtr.39327.1.S1_at   | Hypothetical protein                                | -5.74 |
| Msa.1809.1.S1_at    | Hypothetical protein                                | -5.74 |
| Msa.1661.1.S1_s_at  | Hypothetical protein                                | -5.74 |
| Mtr.39005.1.S1_at   | Nitrate transporter                                 | -5.74 |
| Mtr.34797.1.S1_at   | Hypothetical protein                                | -5.74 |
| Mtr.38390.1.S1_at   | Hypothetical protein                                | -5.73 |
| Mtr.31078.1.S1_at   | CPD photolyase                                      | -5.73 |
| Mtr.44890.1.S1_at   | Calcium binding protein                             | -5.73 |
| Mtr.16355.1.S1_at   | HSP20-like chaperone                                | -5.73 |
| Mtr.14230.1.S1_at   | Hypothetical protein                                | -5.72 |
| Mtr.11744.1.S1_at   | Hypothetical protein                                | -5.72 |
| Mtr.46061.1.S1_s_at | Dynamin GTPase effector                             | -5.72 |



|                     |                                    |       |
|---------------------|------------------------------------|-------|
| Mtr.13813.1.S1_s_at | Alkaline/neutral invertase         | -5.72 |
| Msa.1434.1.S1_at    | Hypothetical protein               | -5.71 |
| Mtr.27892.1.S1_at   | Hypothetical protein               | -5.71 |
| Mtr.42133.1.S1_at   | Protein kinase                     | -5.71 |
| Mtr.51464.1.S1_at   | Thiolase                           | -5.70 |
| Msa.3115.1.S1_at    | Hypothetical protein               | -5.70 |
| Mtr.42337.1.S1_at   | 4-coumarate:CoA ligase isoenzyme 2 | -5.70 |
| Mtr.14519.1.S1_a_at | RNA-binding region RNP-1           | -5.70 |
| Mtr.12774.1.S1_s_at | Bg55 protein                       | -5.70 |
| Msa.3163.1.S1_at    | Hypothetical protein               | -5.70 |
| Mtr.9072.1.S1_at    | Acyltransferase                    | -5.70 |
| Mtr.25389.1.S1_at   | Vestitone reductase                | -5.69 |
| Msa.1069.1.S1_at    | Hypothetical protein               | -5.68 |
| Mtr.19730.1.S1_at   | Microtubule-associated protein     | -5.68 |
| Msa.1619.1.S1_at    | Hypothetical protein               | -5.68 |
| Msa.1746.1.S1_at    | Hypothetical protein               | -5.68 |
| Mtr.31115.1.S1_at   | Hypothetical protein               | -5.67 |
| Mtr.39936.1.S1_at   | Spermidine synthase 2              | -5.67 |
| Msa.1112.1.S1_at    | Hypothetical protein               | -5.67 |
| Mtr.24717.1.S1_s_at | Arabinogalactan protein            | -5.66 |
| Mtr.24083.1.S1_at   | Uroporphyrinogen decarboxylase     | -5.65 |
| Mtr.28737.1.S1_at   | Homeodomain protein GhHOX1         | -5.64 |
| Mtr.37792.1.S1_at   | Hypothetical protein               | -5.64 |
| Msa.2814.1.S1_at    | Hypothetical protein               | -5.64 |
| Mtr.22781.1.S1_at   | Photosystem I-N subunit            | -5.64 |
| Mtr.49075.1.S1_at   | Peptidase M24                      | -5.64 |
| Mtr.37372.1.S1_at   | Dehydroascorbate reductase         | -5.63 |
| Mtr.33475.1.S1_s_at | Proline-rich protein               | -5.63 |
| Msa.3138.1.S1_a_at  | Hypothetical protein               | -5.63 |
| Mtr.15245.1.S1_at   | ABC transporter                    | -5.62 |
| Mtr.13613.1.S1_s_at | Actin-related protein 8B           | -5.62 |
| Mtr.32848.1.S1_at   | Hypothetical protein               | -5.61 |
| Mtr.5310.1.S1_s_at  | Light harvesting protein           | -5.60 |
| Mtr.14519.1.S1_at   | RNA-binding region RNP-1           | -5.59 |
| Mtr.51925.1.S1_at   | Hypothetical protein               | -5.59 |
| Mtr.44320.1.S1_at   | Hypothetical protein               | -5.59 |
| Mtr.20801.1.S1_at   | Homeodomain-like protein           | -5.59 |
| Mtr.21006.1.S1_at   | Hypothetical protein               | -5.58 |
| Mtr.38321.1.S1_at   | Transfactor-like protein           | -5.58 |
| Mtr.8728.1.S1_at    | Hypothetical protein               | -5.58 |
| Mtr.17441.1.S1_at   | Glycoside hydrolase                | -5.58 |
| Mtr.30695.1.S1_at   | Hypothetical protein               | -5.57 |
| Mtr.1779.1.S1_at    | Hypothetical protein               | -5.57 |
| Msa.1021.1.S1_at    | Hypothetical protein               | -5.57 |
| Mtr.10648.1.S1_at   | UOS1                               | -5.57 |
| Mtr.11208.1.S1_at   | Hypothetical protein               | -5.57 |
| Mtr.44814.1.S1_at   | Ycf49-like protein                 | -5.56 |
| Mtr.8844.1.S1_at    | Mitogen-activated protein kinase   | -5.56 |
| Mtr.48097.1.S1_at   | Hypothetical protein               | -5.55 |
| Mtr.51204.1.S1_at   | Amine oxidase                      | -5.55 |
| Mtr.48937.1.S1_at   | Hypothetical protein               | -5.55 |
| Mtr.10412.1.S1_at   | Oxygen-evolving enhancer protein 3 | -5.55 |
| Mtr.34732.1.S1_at   | Trehalose-6-phosphate synthase     | -5.55 |
| Mtr.13374.1.S1_at   | Protein kinase                     | -5.54 |

|                     |                                                 |       |
|---------------------|-------------------------------------------------|-------|
| Mtr.34614.1.S1_at   | Hypothetical protein                            | -5.54 |
| Mtr.5618.1.S1_at    | Zinc finger protein                             | -5.54 |
| Msa.1072.1.S1_at    | Hypothetical protein                            | -5.52 |
| Mtr.2306.1.S1_at    | Trehalose-6-phosphate phosphatase               | -5.52 |
| Mtr.32674.1.S1_at   | Hypothetical protein                            | -5.51 |
| Mtr.5426.1.S1_at    | Receptor protein kinase                         | -5.50 |
| Mtr.41877.1.S1_at   | Hypothetical protein                            | -5.50 |
| Mtr.51462.1.S1_s_at | Zn-finger, RING                                 | -5.50 |
| Mtr.41896.1.S1_s_at | Hypothetical protein                            | -5.50 |
| Mtr.12262.1.S1_at   | Extensin 3                                      | -5.49 |
| Msa.3103.1.S1_at    | Hypothetical protein                            | -5.49 |
| Mtr.47272.1.S1_at   | Elongation factor P (EF-P)                      | -5.49 |
| Mtr.39696.1.S1_at   | Hypothetical protein                            | -5.49 |
| Mtr.43833.1.S1_at   | Hypothetical protein                            | -5.48 |
| Mtr.39943.1.S1_at   | Hypothetical protein                            | -5.48 |
| Mtr.42768.1.S1_at   | Hypothetical protein                            | -5.48 |
| Mtr.6731.1.S1_at    | PSII D1 protein processing enzyme               | -5.48 |
| Mtr.40187.1.S1_at   | Serine hydroxymethyltransferase                 | -5.47 |
| Mtr.19691.1.S1_at   | Hypothetical protein                            | -5.46 |
| Mtr.40561.1.S1_at   | Hypothetical protein                            | -5.45 |
| Mtr.11939.1.S1_at   | RelA-SpoT like protein RSH1                     | -5.45 |
| Mtr.41489.1.S1_at   | Hypothetical protein                            | -5.45 |
| Mtr.4994.1.S1_at    | Hypothetical protein                            | -5.45 |
| Mtr.37015.1.S1_at   | Hydroxymethylglutaryl-CoA lyase                 | -5.45 |
| Mtr.50308.1.S1_at   | Hypothetical protein                            | -5.45 |
| Mtr.30232.1.S1_at   | Hypothetical protein                            | -5.44 |
| Mtr.24601.1.S1_at   | Receptor-related protein kinase                 | -5.44 |
| Mtr.32162.1.S1_at   | Hypothetical protein                            | -5.44 |
| Mtr.21855.1.S1_at   | Hypothetical protein                            | -5.44 |
| Mtr.25985.1.S1_at   | L-asparaginase                                  | -5.44 |
| Mtr.31928.1.S1_at   | Peroxidase 25                                   | -5.43 |
| Mtr.25648.1.S1_at   | Amino acid transporter                          | -5.43 |
| Mtr.43000.1.S1_at   | Hypothetical protein                            | -5.43 |
| Mtr.7095.1.S1_at    | Na <sup>+</sup> /H <sup>+</sup> antiporter NHX6 | -5.43 |
| Mtr.4424.1.S1_at    | Hypothetical protein                            | -5.42 |
| Mtr.5882.1.S1_at    | Hypothetical protein                            | -5.42 |
| Mtr.9162.1.S1_at    | Carboxypeptidase type III                       | -5.40 |
| Mtr.44395.1.S1_at   | Hypothetical protein                            | -5.40 |
| Mtr.32559.1.S1_at   | Pherophorin                                     | -5.40 |
| Mtr.11162.1.S1_at   | GTP-binding protein LepA                        | -5.39 |
| Mtr.37476.1.S1_at   | Bimodular protein                               | -5.38 |
| Mtr.13378.1.S1_at   | Zinc finger protein 4                           | -5.38 |
| Mtr.33770.1.S1_at   | Hypothetical protein                            | -5.38 |
| Mtr.9483.1.S1_at    | Hypothetical protein                            | -5.38 |
| Mtr.43824.1.S1_at   | Thioredoxin M-type 3                            | -5.38 |
| Mtr.9796.1.S1_at    | Hypothetical protein                            | -5.37 |
| Mtr.5041.1.S1_s_at  | Alcohol dehydrogenase                           | -5.37 |
| Mtr.35108.1.S1_at   | Hypothetical protein                            | -5.37 |
| Mtr.11736.1.S1_at   | Aquaporin NIP-type                              | -5.37 |
| Msa.2747.1.S1_at    | Hypothetical protein                            | -5.36 |
| Msa.3120.1.S1_at    | Hypothetical protein                            | -5.36 |
| Mtr.13054.1.S1_at   | Wall-associated kinase                          | -5.35 |
| Mtr.46001.1.S1_s_at | Hypothetical protein                            | -5.35 |
| Mtr.39027.1.S1_s_at | Hypothetical protein                            | -5.35 |

|                     |                                                   |       |
|---------------------|---------------------------------------------------|-------|
| Mtr.2881.1.S1_at    | Hypothetical protein                              | -5.34 |
| Mtr.9540.1.S1_at    | RING finger protein                               | -5.34 |
| Mtr.10799.1.S1_at   | Multi resistance protein                          | -5.34 |
| Mtr.29262.1.S1_at   | 3-hydroxy-3-methylglutaryl-coenzyme A reductase 2 | -5.34 |
| Mtr.52072.1.S1_at   | Hypothetical protein                              | -5.34 |
| Mtr.11265.1.S1_at   | Glycosyl hydrolase                                | -5.33 |
| Mtr.9508.1.S1_at    | Leucine rich repeat-like protein                  | -5.33 |
| Msa.3151.1.S1_at    | Hypothetical protein                              | -5.33 |
| Mtr.35849.1.S1_at   | Hypothetical protein                              | -5.32 |
| Mtr.4814.1.S1_at    | AROGP2                                            | -5.32 |
| Msa.1835.1.S1_at    | Hypothetical protein                              | -5.32 |
| Msa.1588.1.S1_at    | Hypothetical protein                              | -5.32 |
| Mtr.40105.1.S1_at   | Hypothetical protein                              | -5.32 |
| Mtr.9532.1.S1_at    | Hypothetical protein                              | -5.32 |
| Mtr.40716.1.S1_at   | WAP four-disulfide core domain protein 1          | -5.31 |
| Mtr.11721.1.S1_at   | Lycopene epsilon-cyclase                          | -5.31 |
| Mtr.45322.1.S1_at   | Hypothetical protein                              | -5.31 |
| Mtr.8501.1.S1_s_at  | Glycolate oxidase                                 | -5.30 |
| Msa.1877.1.S1_at    | Hypothetical protein                              | -5.30 |
| Mtr.8575.1.S1_x_at  | Glucosyltransferase-13                            | -5.30 |
| Mtr.19596.1.S1_at   | TPR repeat protein                                | -5.30 |
| Mtr.41539.1.S1_at   | Hypothetical protein                              | -5.30 |
| Mtr.27682.1.S1_at   | NS5 protein                                       | -5.30 |
| Mtr.39009.1.S1_at   | Serine-rich protein                               | -5.29 |
| Mtr.13736.1.S1_at   | Senescence-associated protein SAG102              | -5.29 |
| Mtr.40668.1.S1_at   | Hypothetical protein                              | -5.29 |
| Mtr.2587.1.S1_at    | Membrane-associated salt-inducible protein        | -5.29 |
| Mtr.14004.1.S1_at   | Hypothetical protein                              | -5.28 |
| Mtr.37696.1.S1_at   | Hypothetical protein                              | -5.28 |
| Mtr.29983.1.S1_s_at | Beta-carotene hydroxylase                         | -5.28 |
| Mtr.6706.1.S1_at    | Hypothetical protein                              | -5.28 |
| Mtr.9045.1.S1_at    | Carbonate dehydratase                             | -5.27 |
| Mtr.40379.1.S1_at   | Leucoanthocyanidin dioxygenase                    | -5.27 |
| Mtr.41850.1.S1_at   | Hypothetical protein                              | -5.27 |
| Mtr.9347.1.S1_at    | Hypothetical protein                              | -5.27 |
| Mtr.37762.1.S1_at   | Glutathione S-transferase GST 9                   | -5.27 |
| Mtr.32117.1.S1_at   | Hypothetical protein                              | -5.26 |
| Mtr.13579.1.S1_at   | Photoreceptor-interacting transcription factor    | -5.26 |
| Msa.3148.1.S1_at    | Hypothetical protein                              | -5.26 |
| Mtr.8435.1.S1_at    | Lipoxygenase                                      | -5.26 |
| Mtr.12179.1.S1_at   | Hypothetical protein                              | -5.26 |
| Mtr.34494.1.S1_at   | Hypothetical protein                              | -5.25 |
| Mtr.32495.1.S1_at   | Protein kinase                                    | -5.25 |
| Mtr.26217.1.S1_at   | Auxin response factor 5                           | -5.24 |
| Mtr.31555.1.S1_at   | Beta-1,3-glucanase                                | -5.24 |
| Mtr.8925.1.S1_s_at  | Signal recognition particle 54 kDa subunit        | -5.24 |
| Mtr.38360.1.S1_at   | Hypothetical protein                              | -5.24 |
| Mtr.37072.1.S1_at   | Hypothetical protein                              | -5.23 |
| Mtr.43001.1.S1_at   | Aminotransferase 2                                | -5.23 |
| Mtr.1749.1.S1_s_at  | MutT domain protein                               | -5.23 |
| Mtr.12080.1.S1_s_at | Hypothetical protein                              | -5.22 |
| Mtr.5510.1.S1_at    | Hypothetical protein                              | -5.21 |
| Mtr.39594.1.S1_at   | Trehalose-6-phosphate phosphatase                 | -5.21 |
| Mtr.44856.1.S1_at   | Beta-amylase                                      | -5.20 |

|                     |                                                       |       |
|---------------------|-------------------------------------------------------|-------|
| Mtr.4407.1.S1_at    | Transcription factor, CCAAT-binding                   | -5.20 |
| Mtr.35779.1.S1_at   | Seed maturation protein PM27                          | -5.20 |
| Mtr.29279.1.S1_at   | Lipoxygenase                                          | -5.20 |
| Mtr.19280.1.S1_at   | Multi antimicrobial extrusion protein MatE            | -5.20 |
| Msa.2593.1.S1_at    | Hypothetical protein                                  | -5.20 |
| Mtr.5570.1.S1_at    | Plasma membrane sulphate transporter                  | -5.19 |
| Mtr.7911.1.S1_s_at  | ER1-like receptor kinase                              | -5.19 |
| Mtr.40297.1.S1_at   | Cytochrome b6f complex subunit                        | -5.18 |
| Msa.926.1.S1_at     | Hypothetical protein                                  | -5.18 |
| Mtr.22047.1.S1_at   | Hypothetical protein                                  | -5.18 |
| Mtr.25643.1.S1_at   | B-type cyclin                                         | -5.18 |
| Mtr.37192.1.S1_at   | Hypothetical protein                                  | -5.18 |
| Msa.473.1.S1_at     | Hypothetical protein                                  | -5.18 |
| Mtr.17452.1.S1_at   | Glycoside transferase                                 | -5.18 |
| Mtr.41066.1.S1_at   | Hypothetical protein                                  | -5.17 |
| Mtr.9062.1.S1_at    | Hypothetical protein                                  | -5.17 |
| Mtr.17195.1.S1_at   | RNA-binding region RNP-1                              | -5.17 |
| Mtr.39734.1.S1_at   | Glutathione S-transferase                             | -5.16 |
| Mtr.18673.1.S1_at   | Esterase/lipase/thioesterase                          | -5.15 |
| Mtr.12679.1.S1_at   | Peroxiredoxin-like protein                            | -5.15 |
| Mtr.40437.1.S1_at   | ABC transporter                                       | -5.15 |
| Mtr.32399.1.S1_at   | Hypothetical protein                                  | -5.14 |
| Mtr.6734.1.S1_s_at  | Hypothetical protein                                  | -5.14 |
| Mtr.50716.1.S1_s_at | Glycosyl transferase                                  | -5.13 |
| Mtr.37688.1.S1_at   | Hypothetical protein                                  | -5.13 |
| Mtr.2641.1.S1_at    | Hypothetical protein                                  | -5.13 |
| Msa.1523.1.S1_at    | Hypothetical protein                                  | -5.12 |
| Mtr.40232.1.S1_s_at | Geranylgeranyl hydrogenase                            | -5.12 |
| Mtr.44687.1.S1_at   | Hypothetical protein                                  | -5.12 |
| Mtr.35286.1.S1_at   | Twist related protein 1                               | -5.11 |
| Mtr.29418.1.S1_at   | Hypothetical protein                                  | -5.11 |
| Msa.2895.1.S1_at    | Hypothetical protein                                  | -5.10 |
| Mtr.43042.1.S1_at   | LEDI-5c protein                                       | -5.09 |
| Mtr.10615.1.S1_at   | Cellulose synthase catalytic subunit                  | -5.09 |
| Mtr.39209.1.S1_at   | Hypothetical protein                                  | -5.09 |
| Mtr.6365.1.S1_at    | Acetolactate synthase                                 | -5.09 |
| Mtr.43323.1.S1_at   | Polygalacturonase-like protein                        | -5.09 |
| Mtr.10685.1.S1_at   | Hypothetical protein                                  | -5.09 |
| Mtr.39386.1.S1_at   | Hypothetical protein                                  | -5.09 |
| Mtr.39345.1.S1_at   | Oligopeptidase B                                      | -5.08 |
| Mtr.40321.1.S1_at   | Hydroperoxide lyase                                   | -5.08 |
| Msa.1503.1.S1_at    | Hypothetical protein                                  | -5.08 |
| Mtr.21060.1.S1_at   | Peptidyl-prolyl cis-trans isomerase, cyclophilin type | -5.08 |
| Mtr.15949.1.S1_at   | Hypothetical protein                                  | -5.07 |
| Mtr.24898.1.S1_at   | Magnesium/proton exchanger (MHX1)                     | -5.07 |
| Mtr.12831.1.S1_at   | NBD-like protein                                      | -5.07 |
| Mtr.8447.1.S1_s_at  | Hypothetical protein                                  | -5.07 |
| Mtr.14157.1.S1_at   | Gibberellin regulated protein                         | -5.06 |
| Mtr.27855.1.S1_at   | Heat shock protein                                    | -5.06 |
| Mtr.44031.1.S1_at   | Hypothetical protein                                  | -5.06 |
| Mtr.32711.1.S1_at   | Hypothetical protein                                  | -5.06 |
| Mtr.34769.1.S1_at   | Hypothetical protein                                  | -5.06 |
| Mtr.22479.1.S1_at   | Anthocyanin 1                                         | -5.05 |
| Mtr.15921.1.S1_at   | Hypothetical protein                                  | -5.05 |

|                     |                                               |       |
|---------------------|-----------------------------------------------|-------|
| Mtr.52045.1.S1_at   | Hypothetical protein                          | -5.05 |
| Mtr.43891.1.S1_at   | Hypothetical protein                          | -5.05 |
| Mtr.40723.1.S1_at   | Hypothetical protein                          | -5.04 |
| Mtr.12672.1.S1_at   | Cytochrome P-450 71A1                         | -5.04 |
| Mtr.31344.1.S1_at   | Oxidoreductase-like protein                   | -5.04 |
| Mtr.4077.1.S1_at    | Hypothetical protein                          | -5.04 |
| Mtr.37359.1.S1_at   | 50S ribosomal protein L18                     | -5.04 |
| Msa.1282.1.S1_at    | Hypothetical protein                          | -5.04 |
| Mtr.34452.1.S1_at   | Hypothetical protein                          | -5.04 |
| Mtr.8397.1.S1_at    | Anthranilate synthase alpha subunit           | -5.03 |
| Mtr.12931.1.S1_at   | Hypothetical protein                          | -5.03 |
| Mtr.48824.1.S1_at   | tRNA isopentenyltransferase                   | -5.02 |
| Mtr.13781.1.S1_at   | Hypothetical protein                          | -5.02 |
| Mtr.44321.1.S1_at   | Hypothetical protein                          | -5.02 |
| Mtr.13442.1.S1_at   | Hypothetical protein                          | -5.01 |
| Mtr.13038.1.S1_at   | Hypothetical protein                          | -5.01 |
| Msa.3079.1.S1_at    | Hypothetical protein                          | -5.01 |
| Mtr.42974.1.S1_at   | Hydroxyisourate hydrolase                     | -5.01 |
| Mtr.9427.1.S1_at    | Hypothetical protein                          | -5.01 |
| Mtr.785.1.S1_s_at   | Hypothetical protein                          | -5.01 |
| Mtr.32662.1.S1_at   | Beta-amylase                                  | -5.00 |
| Mtr.31160.1.S1_at   | En/Spm-like transposon protein                | -5.00 |
| Mtr.51697.1.S1_at   | Hypothetical protein                          | -4.99 |
| Mtr.44918.1.S1_at   | Lysophospholipase 1 precursor                 | -4.99 |
| Mtr.44756.1.S1_at   | Hypothetical protein                          | -4.99 |
| Mtr.38455.1.S1_at   | Hypothetical protein                          | -4.99 |
| Mtr.12359.1.S1_at   | Hypothetical protein                          | -4.99 |
| Mtr.44620.1.S1_at   | Polygalacturonase                             | -4.99 |
| Mtr.4684.1.S1_s_at  | Hypothetical protein                          | -4.98 |
| Mtr.44847.1.S1_at   | Glycosyltransferase family protein 47         | -4.98 |
| Mtr.1796.1.S1_at    | Hypothetical protein                          | -4.98 |
| Mtr.4037.1.S1_at    | Hypothetical protein                          | -4.98 |
| Mtr.43771.1.S1_at   | Hypothetical protein                          | -4.98 |
| Mtr.28729.1.S1_at   | Serine protease-like protein                  | -4.98 |
| Mtr.13670.1.S1_at   | Hypothetical protein                          | -4.97 |
| Mtr.44765.1.S1_at   | Lycopene epsilon cyclase                      | -4.97 |
| Mtr.3869.1.S1_at    | Hypothetical protein                          | -4.97 |
| Mtr.49874.1.S1_at   | Zn-finger, RING                               | -4.97 |
| Mtr.6322.1.S1_s_at  | Cytochrome P450                               | -4.96 |
| Mtr.43371.1.S1_at   | Peroxidase                                    | -4.96 |
| Mtr.8269.1.S1_at    | Hypothetical protein                          | -4.96 |
| Mtr.12754.1.S1_at   | Hypothetical protein                          | -4.95 |
| Mtr.10170.1.S1_at   | Hypothetical protein                          | -4.95 |
| Mtr.40305.1.S1_at   | Hypothetical protein                          | -4.95 |
| Mtr.15024.1.S1_at   | Hypothetical protein                          | -4.95 |
| Mtr.3201.1.S1_at    | LysM domain-containing receptor-like kinase 1 | -4.95 |
| Mtr.24230.1.S1_at   | Isoflavone reductase                          | -4.95 |
| Msa.2963.1.S1_at    | Hypothetical protein                          | -4.94 |
| Msa.1405.1.S1_at    | Hypothetical protein                          | -4.94 |
| Mtr.21631.1.S1_at   | Peptide chain release factor 2                | -4.94 |
| Mtr.31392.1.S1_s_at | Desiccation protectant protein Lea14          | -4.94 |
| Mtr.15326.1.S1_at   | ABA/WDS induced protein                       | -4.94 |
| Mtr.8478.1.S1_at    | Cytochrome P450                               | -4.94 |
| Mtr.27870.1.S1_at   | Hypothetical protein                          | -4.93 |

|                     |                                          |       |
|---------------------|------------------------------------------|-------|
| Mtr.30845.1.S1_at   | Nodulin-like protein                     | -4.93 |
| Mtr.44755.1.S1_at   | LRR-like protein                         | -4.93 |
| Msa.1150.1.S1_at    | Hypothetical protein                     | -4.93 |
| Msa.1689.1.S1_at    | Hypothetical protein                     | -4.93 |
| Mtr.13829.1.S1_at   | Hypothetical protein                     | -4.93 |
| Mtr.29249.1.S1_at   | Hypothetical protein                     | -4.92 |
| Mtr.7993.1.S1_s_at  | Glyceraldehyde-3-phosphate dehydrogenase | -4.92 |
| Mtr.50857.1.S1_at   | Peptidase S10                            | -4.92 |
| Mtr.14245.1.S1_at   | Hypothetical protein                     | -4.92 |
| Mtr.5792.1.S1_at    | Hypothetical protein                     | -4.91 |
| Mtr.38815.1.S1_at   | Hypothetical protein                     | -4.91 |
| Mtr.5786.1.S1_at    | MAP kinase                               | -4.91 |
| Msa.2707.1.S1_at    | Hypothetical protein                     | -4.91 |
| Msa.1083.1.S1_at    | Hypothetical protein                     | -4.90 |
| Mtr.1621.1.S1_s_at  | Hypothetical protein                     | -4.90 |
| Msa.985.1.S1_at     | Hypothetical protein                     | -4.90 |
| Mtr.38245.1.S1_at   | Transcription factor RAU1                | -4.90 |
| Mtr.20901.1.S1_s_at | Heat shock protein Hsp70                 | -4.89 |
| Mtr.38047.1.S1_at   | Monogalactosyldiacylglycerol synthase    | -4.89 |
| Mtr.28777.1.S1_at   | Hypothetical protein                     | -4.89 |
| Mtr.33440.1.S1_at   | 30S ribosomal protein S16                | -4.88 |
| Mtr.44455.1.S1_at   | Hypothetical protein                     | -4.88 |
| Mtr.41614.1.S1_at   | Hypothetical protein                     | -4.88 |
| Mtr.9382.1.S1_at    | Serine carboxypeptidase II               | -4.88 |
| Mtr.8504.1.S1_at    | Hypothetical protein                     | -4.88 |
| Mtr.9861.1.S1_at    | Hypothetical protein                     | -4.88 |
| Mtr.9495.1.S1_at    | Sugar transporter                        | -4.87 |
| Mtr.34855.1.S1_at   | Receptor-like protein kinase 2           | -4.87 |
| Mtr.40550.1.S1_at   | Hypothetical protein                     | -4.87 |
| Mtr.33840.1.S1_at   | Hypothetical protein                     | -4.87 |
| Mtr.25447.1.S1_at   | Hypothetical protein                     | -4.87 |
| Mtr.40978.1.S1_at   | Hypothetical protein                     | -4.87 |
| Mtr.39502.1.S1_at   | Hypothetical protein                     | -4.87 |
| Mtr.223.1.S1_at     | Photolyase/blue-light receptor           | -4.86 |
| Mtr.831.1.S1_at     | Hypothetical protein                     | -4.86 |
| Mtr.8926.1.S1_at    | Alpha-D-xylosidase                       | -4.86 |
| Mtr.41057.1.S1_at   | Hypothetical protein                     | -4.85 |
| Mtr.27040.1.S1_s_at | Hypothetical protein                     | -4.85 |
| Mtr.7486.1.S1_s_at  | Zinc finger protein                      | -4.85 |
| Mtr.34765.1.S1_at   | Hypothetical protein                     | -4.85 |
| Mtr.8572.1.S1_at    | Thaumatococcus-like protein              | -4.84 |
| Msa.3056.1.S1_at    | Hypothetical protein                     | -4.84 |
| Mtr.42503.1.S1_at   | Isoflavonoid glucosyltransferase         | -4.84 |
| Mtr.784.1.S1_s_at   | Hypothetical protein                     | -4.84 |
| Mtr.11698.1.S1_at   | APETALA3                                 | -4.84 |
| Mtr.10231.1.S1_at   | Hypothetical protein                     | -4.84 |
| Mtr.49132.1.S1_at   | Ferredoxin                               | -4.84 |
| Mtr.37806.1.S1_at   | Cellulose synthase                       | -4.83 |
| Mtr.42284.1.S1_at   | Hypothetical protein                     | -4.83 |
| Mtr.9325.1.S1_at    | Hypothetical protein                     | -4.83 |
| Mtr.30134.1.S1_at   | Serine carboxypeptidase                  | -4.83 |
| Mtr.6087.1.S1_at    | Hypothetical protein                     | -4.83 |
| Mtr.50278.1.S1_s_at | Ras GTPase                               | -4.83 |
| Mtr.27879.1.S1_at   | Hypothetical protein                     | -4.82 |

|                     |                                                                        |       |
|---------------------|------------------------------------------------------------------------|-------|
| Mtr.16894.1.S1_at   | Zn-finger, CCHC type                                                   | -4.82 |
| Msa.341.1.S1_at     | Hypothetical protein                                                   | -4.82 |
| Mtr.41288.1.S1_at   | Hypothetical protein                                                   | -4.82 |
| Mtr.40565.1.S1_at   | GTP-binding protein                                                    | -4.81 |
| Mtr.40744.1.S1_at   | Hypothetical protein                                                   | -4.81 |
| Mtr.38175.1.S1_at   | Hypothetical protein                                                   | -4.81 |
| Mtr.33530.1.S1_at   | Hypothetical protein                                                   | -4.81 |
| Mtr.43506.1.S1_at   | Hypothetical protein                                                   | -4.81 |
| Mtr.1424.1.S1_at    | Hypothetical protein                                                   | -4.80 |
| Mtr.11739.1.S1_s_at | Homogentisate phytylprenyltransferase                                  | -4.80 |
| Mtr.27440.1.S1_at   | Hypothetical protein                                                   | -4.80 |
| Mtr.19208.1.S1_at   | Zn-finger, RING                                                        | -4.80 |
| Mtr.31664.1.S1_at   | Hypothetical protein                                                   | -4.79 |
| Mtr.37156.1.S1_at   | Hypothetical protein                                                   | -4.79 |
| Mtr.42585.1.S1_at   | Hypothetical protein                                                   | -4.79 |
| Mtr.8942.1.S1_at    | Desiccation protectant protein Lea14                                   | -4.79 |
| Mtr.25990.1.S1_at   | Hypothetical protein                                                   | -4.79 |
| Mtr.37299.1.S1_at   | Hypothetical protein                                                   | -4.79 |
| Mtr.12856.1.S1_at   | Hypothetical protein                                                   | -4.79 |
| Mtr.28080.1.S1_at   | Anthocyanin 5-aromatic acyltransferase/benzoyltransferase-like protein | -4.79 |
| Mtr.6765.1.S1_at    | Hypothetical protein                                                   | -4.79 |
| Mtr.31565.1.S1_s_at | Hypothetical protein                                                   | -4.78 |
| Mtr.45813.1.S1_at   | Hypothetical protein                                                   | -4.78 |
| Mtr.40184.1.S1_at   | FtsH protease (VAR2)                                                   | -4.78 |
| Mtr.11186.1.S1_at   | Pyruvate, phosphate dikinase                                           | -4.78 |
| Msa.2997.1.S1_at    | Hypothetical protein                                                   | -4.78 |
| Mtr.15246.1.S1_at   | ABC transporter                                                        | -4.78 |
| Mtr.10800.1.S1_s_at | Hypothetical protein                                                   | -4.78 |
| Mtr.1405.1.S1_at    | Hypothetical protein                                                   | -4.78 |
| Mtr.8848.1.S1_at    | Alpha-xylosidase                                                       | -4.77 |
| Mtr.38223.1.S1_at   | Acyltransferase                                                        | -4.77 |
| Mtr.41591.1.S1_at   | 3-ketoacyl-ACP synthase                                                | -4.77 |
| Mtr.51232.1.S1_at   | Multi antimicrobial extrusion protein MatE                             | -4.76 |
| Mtr.17267.1.S1_at   | Hypothetical protein                                                   | -4.76 |
| Mtr.44793.1.S1_at   | Hypothetical protein                                                   | -4.76 |
| Mtr.45471.1.S1_at   | Hypothetical protein                                                   | -4.76 |
| Mtr.45264.1.S1_at   | Hypothetical protein                                                   | -4.76 |
| Mtr.38761.1.S1_s_at | Cell division protein FtsH-like                                        | -4.76 |
| Msa.1739.1.S1_at    | Hypothetical protein                                                   | -4.76 |
| Mtr.8878.1.S1_at    | Hypothetical protein                                                   | -4.76 |
| Mtr.44396.1.S1_at   | Hypothetical protein                                                   | -4.75 |
| Mtr.11645.1.S1_at   | Methionine aminopeptidase                                              | -4.75 |
| Mtr.6008.1.S1_at    | Hypothetical protein                                                   | -4.75 |
| Mtr.44189.1.S1_at   | BEL1-related homeotic protein 14                                       | -4.75 |
| Mtr.29172.1.S1_at   | Hypothetical protein                                                   | -4.74 |
| Mtr.13501.1.S1_at   | Alanyl-tRNA synthetase                                                 | -4.74 |
| Mtr.43269.1.S1_at   | 30S ribosomal protein S1                                               | -4.74 |
| Mtr.37893.1.S1_s_at | Cytochrome P450 monooxygenase                                          | -4.74 |
| Mtr.6354.1.S1_at    | TPR-containing protein                                                 | -4.73 |
| Mtr.37429.1.S1_at   | Cytosolic aldehyde dehydrogenase                                       | -4.73 |
| Mtr.20847.1.S1_at   | MtN3 and saliva related transmembrane protein                          | -4.73 |
| Mtr.20846.1.S1_at   | MtN3 and saliva related transmembrane protein                          | -4.73 |
| Mtr.50278.1.S1_at   | Ras GTPase                                                             | -4.73 |
| Mtr.713.1.S1_s_at   | Nucleotide pyrophosphatase                                             | -4.73 |

|                     |                                                        |       |
|---------------------|--------------------------------------------------------|-------|
| Mtr.8877.1.S1_at    | Hypothetical protein                                   | -4.73 |
| Mtr.35108.1.S1_s_at | Hypothetical protein                                   | -4.72 |
| Mtr.28002.1.S1_at   | Hypothetical protein                                   | -4.72 |
| Mtr.10212.1.S1_at   | Hypothetical protein                                   | -4.72 |
| Mtr.7389.1.S1_s_at  | Yippee-like protein                                    | -4.72 |
| Mtr.13786.1.S1_at   | Hypothetical protein                                   | -4.72 |
| Msa.911.1.S1_at     | Hypothetical protein                                   | -4.71 |
| Mtr.9270.1.S1_at    | Hypothetical protein                                   | -4.71 |
| Mtr.15385.1.S1_at   | UbiA prenyltransferase                                 | -4.71 |
| Mtr.8460.1.S1_s_at  | Pathogen-inducible alpha-dioxygenase                   | -4.70 |
| Mtr.41249.1.S1_at   | 30S ribosomal protein S13                              | -4.70 |
| Mtr.25580.1.S1_at   | Hypothetical protein                                   | -4.70 |
| Mtr.44600.1.S1_at   | Hypothetical protein                                   | -4.70 |
| Mtr.41953.1.S1_at   | Hypothetical protein                                   | -4.70 |
| Mtr.6062.1.S1_at    | Hypothetical protein                                   | -4.70 |
| Msa.2749.1.S1_at    | Hypothetical protein                                   | -4.70 |
| Mtr.45294.1.S1_at   | Methionine synthase                                    | -4.70 |
| Mtr.24815.1.S1_at   | Glutaredoxin protein                                   | -4.70 |
| Mtr.36918.1.S1_at   | Hypothetical protein                                   | -4.69 |
| Mtr.33410.1.S1_at   | Hypothetical protein                                   | -4.69 |
| Mtr.14223.1.S1_at   | bHLH DNA-binding                                       | -4.69 |
| Mtr.42658.1.S1_at   | Ski protein                                            | -4.69 |
| Mtr.50224.1.S1_s_at | Hypothetical protein                                   | -4.68 |
| Mtr.45146.1.S1_at   | Apolipoprotein D                                       | -4.68 |
| Mtr.32895.1.S1_at   | Hypothetical protein                                   | -4.68 |
| Mtr.46498.1.S1_at   | Hypothetical protein                                   | -4.68 |
| Mtr.39361.1.S1_at   | Glucanase like protein                                 | -4.67 |
| Mtr.28688.1.S1_at   | Hypothetical protein                                   | -4.67 |
| Mtr.31359.1.S1_at   | Hypothetical protein                                   | -4.67 |
| Mtr.9831.1.S1_at    | Mechanosensitive ion channel domain-containing protein | -4.66 |
| Mtr.11222.1.S1_at   | Hypothetical protein                                   | -4.66 |
| Mtr.39292.1.S1_at   | Hypothetical protein                                   | -4.66 |
| Mtr.9268.1.S1_at    | Hypothetical protein                                   | -4.65 |
| Mtr.20398.1.S1_at   | Hypothetical protein                                   | -4.65 |
| Mtr.35557.1.S1_s_at | Hypothetical protein                                   | -4.65 |
| Mtr.37441.1.S1_s_at | Alcohol dehydrogenase 1                                | -4.65 |
| Mtr.32351.1.S1_at   | Hypothetical protein                                   | -4.64 |
| Mtr.29176.1.S1_at   | Metal-dependent phosphohydrolase                       | -4.64 |
| Mtr.40976.1.S1_at   | Transcription factor Hap5a                             | -4.64 |
| Mtr.42512.1.S1_at   | Sugar transporter-like protein                         | -4.64 |
| Mtr.44149.1.S1_at   | Aquaporin                                              | -4.64 |
| Mtr.12572.1.S1_at   | Hypothetical protein                                   | -4.64 |
| Mtr.13967.1.S1_at   | Phosphoenolpyruvate carboxylase                        | -4.64 |
| Mtr.43992.1.S1_at   | Methionine synthase                                    | -4.64 |
| Mtr.44100.1.S1_at   | Hypothetical protein                                   | -4.64 |
| Msa.1844.1.S1_at    | Hypothetical protein                                   | -4.63 |
| Mtr.37759.1.S1_at   | ERD4 protein                                           | -4.63 |
| Mtr.44012.1.S1_at   | Hypothetical protein                                   | -4.63 |
| Mtr.8416.1.S1_s_at  | Cytochrome b                                           | -4.63 |
| Msa.399.1.S1_at     | Hypothetical protein                                   | -4.63 |
| Mtr.37531.1.S1_at   | Hypothetical protein                                   | -4.62 |
| Mtr.28232.1.S1_s_at | RNA helicase-like protein                              | -4.62 |
| Msa.1765.1.S1_at    | Hypothetical protein                                   | -4.62 |
| Mtr.34734.1.S1_at   | High affinity potassium transporter 2                  | -4.62 |



|                     |                                          |       |
|---------------------|------------------------------------------|-------|
| Mtr.39922.1.S1_at   | Hypothetical protein                     | -4.62 |
| Mtr.44759.1.S1_at   | E-beta-ocimene synthase                  | -4.62 |
| Mtr.8392.1.S1_at    | 4-alpha-glucanotransferase               | -4.61 |
| Mtr.43806.1.S1_at   | Hypothetical protein                     | -4.61 |
| Mtr.8609.1.S1_at    | Photosystem II reaction center           | -4.61 |
| Mtr.12532.1.S1_at   | Patatin-like protein 1                   | -4.59 |
| Mtr.41127.1.S1_at   | Pherophorin                              | -4.59 |
| Mtr.16995.1.S1_at   | Hypothetical protein                     | -4.59 |
| Mtr.52127.1.S1_at   | 2OG-Fe(II) oxygenase                     | -4.59 |
| Mtr.34680.1.S1_at   | Actin-related protein 8B                 | -4.59 |
| Mtr.10882.1.S1_at   | Hypothetical protein                     | -4.58 |
| Mtr.10607.1.S1_at   | PS60 protein                             | -4.58 |
| Mtr.44063.1.S1_at   | Hypothetical protein                     | -4.57 |
| Mtr.5456.1.S1_at    | Valine-tRNA ligase                       | -4.57 |
| Mtr.18567.1.S1_at   | Pyruvate kinase                          | -4.57 |
| Mtr.40869.1.S1_at   | Hypothetical protein                     | -4.56 |
| Mtr.44730.1.S1_at   | Nitrate transporter                      | -4.56 |
| Mtr.50181.1.S1_s_at | Vitamin B6 biosynthesis protein          | -4.56 |
| Mtr.42104.1.S1_at   | Heterotrimeric G-protein gamma subunit 2 | -4.56 |
| Mtr.50437.1.S1_s_at | Hypothetical protein                     | -4.56 |
| Mtr.9652.1.S1_at    | Hypothetical protein                     | -4.56 |
| Mtr.7062.1.S1_at    | Hypothetical protein                     | -4.56 |
| Mtr.41933.1.S1_at   | Kexin                                    | -4.56 |
| Mtr.16129.1.S1_at   | Hypothetical protein                     | -4.55 |
| Msa.1589.1.S1_at    | Hypothetical protein                     | -4.55 |
| Mtr.41133.1.S1_at   | Bell-like homeodomain protein 3          | -4.55 |
| Mtr.2656.1.S1_at    | Serine/threonine protein kinase          | -4.55 |
| Msa.3170.1.S1_at    | Hypothetical protein                     | -4.55 |
| Mtr.42432.1.S1_at   | Hypothetical protein                     | -4.55 |
| Mtr.14334.1.S1_at   | Cytochrome b561                          | -4.54 |
| Mtr.11185.1.S1_at   | SEX1                                     | -4.54 |
| Mtr.31151.1.S1_at   | Hypothetical protein                     | -4.54 |
| Mtr.37091.1.S1_at   | Hypothetical protein                     | -4.54 |
| Mtr.20860.1.S1_at   | Hypothetical protein                     | -4.54 |
| Mtr.41900.1.S1_at   | Hypothetical protein                     | -4.54 |
| Mtr.46514.1.S1_x_at | Alpha/beta-amyrin synthase               | -4.53 |
| Mtr.9709.1.S1_at    | Hypothetical protein                     | -4.53 |
| Msa.2217.1.S1_at    | Hypothetical protein                     | -4.53 |
| Mtr.39889.1.S1_at   | Pherophorin - like protein               | -4.53 |
| Mtr.8981.1.S1_at    | Hypothetical protein                     | -4.53 |
| Mtr.12904.1.S1_at   | Pectinacetylerase                        | -4.53 |
| Mtr.37315.1.S1_at   | Glycolate oxidase                        | -4.53 |
| Mtr.31155.1.S1_at   | Neutral invertase                        | -4.52 |
| Mtr.36792.1.S1_at   | Hypothetical protein                     | -4.52 |
| Mtr.41434.1.S1_at   | Threonine synthase                       | -4.52 |
| Mtr.49018.1.S1_at   | 30S ribosomal protein S31                | -4.52 |
| Mtr.46510.1.S1_at   | Alpha/beta-amyrin synthase               | -4.52 |
| Mtr.13573.1.S1_at   | Cleavage stimulation factor 50           | -4.52 |
| Mtr.13885.1.S1_at   | Actin-like protein                       | -4.52 |
| Mtr.44737.1.S1_at   | Hypothetical protein                     | -4.51 |
| Mtr.44783.1.S1_at   | Hypothetical protein                     | -4.51 |
| Mtr.33734.1.S1_at   | Phosphoglycerate mutase                  | -4.51 |
| Msa.1903.1.S1_at    | Hypothetical protein                     | -4.51 |
| Mtr.10566.1.S1_at   | Hypothetical protein                     | -4.51 |

|                     |                                              |       |
|---------------------|----------------------------------------------|-------|
| Msa.2882.1.S1_at    | Hypothetical protein                         | -4.51 |
| Mtr.37256.1.S1_at   | Hypothetical protein                         | -4.51 |
| Mtr.40913.1.S1_at   | Hypothetical protein                         | -4.51 |
| Mtr.13198.1.S1_at   | PHAP2B protein                               | -4.51 |
| Mtr.8830.1.S1_at    | Hypothetical protein                         | -4.51 |
| AFFX-Mtr-gsta-5_at  | 2,4-D inducible glutathione S-transferase    | -4.50 |
| Mtr.27901.1.S1_at   | Hypothetical protein                         | -4.50 |
| Msa.2125.1.S1_at    | Hypothetical protein                         | -4.50 |
| Mtr.43912.1.S1_at   | Hypothetical protein                         | -4.50 |
| Mtr.23937.1.S1_at   | Hypothetical protein                         | -4.49 |
| Mtr.20125.1.S1_at   | Glycoside hydrolase                          | -4.49 |
| Mtr.28675.1.S1_s_at | Polygalacturonase                            | -4.49 |
| Mtr.33742.1.S1_at   | Acyl-CoA thioesterase                        | -4.49 |
| Mtr.11277.1.S1_at   | Hydroxymethylglutaryl-CoA lyase              | -4.49 |
| Mtr.39481.1.S1_at   | Hypothetical protein                         | -4.49 |
| Mtr.30692.1.S1_at   | Receptor-protein kinase                      | -4.49 |
| Mtr.10045.1.S1_at   | Hypothetical protein                         | -4.49 |
| Msa.2782.1.S1_at    | Hypothetical protein                         | -4.48 |
| Mtr.5904.1.S1_at    | Salt-inducible protein                       | -4.48 |
| Mtr.44684.1.S1_at   | Nucleotide pyrophosphatase-like protein      | -4.48 |
| Msa.3039.1.S1_at    | Hypothetical protein                         | -4.48 |
| Mtr.50233.1.S1_at   | Initiation factor 3                          | -4.47 |
| Mtr.4684.1.S1_at    | Hypothetical protein                         | -4.47 |
| Mtr.40458.1.S1_at   | Hypothetical protein                         | -4.47 |
| Mtr.44377.1.S1_at   | Ferric leghemoglobin reductase               | -4.47 |
| Mtr.10065.1.S1_at   | Hypothetical protein                         | -4.47 |
| Mtr.32860.1.S1_s_at | Hypothetical protein                         | -4.47 |
| Mtr.45556.1.S1_at   | Actin-related protein 8A                     | -4.46 |
| Mtr.6093.1.S1_s_at  | Subtilisin-like protease                     | -4.46 |
| Mtr.44182.1.S1_s_at | LEA protein                                  | -4.46 |
| Mtr.41835.1.S1_at   | Hypothetical protein                         | -4.46 |
| Mtr.29095.1.S1_at   | Respiratory burst oxidase homolog            | -4.46 |
| Mtr.47127.1.S1_at   | Far-red impaired response protein            | -4.46 |
| Mtr.38114.1.S1_at   | Thioredoxin M-type 4                         | -4.46 |
| Mtr.26195.1.S1_at   | Hypothetical protein                         | -4.46 |
| Mtr.43826.1.S1_at   | Hypothetical protein                         | -4.45 |
| Mtr.27418.1.S1_at   | Hypothetical protein                         | -4.45 |
| Mtr.42095.1.S1_at   | Receptor like protein                        | -4.45 |
| Mtr.33779.1.S1_at   | Threonyl-tRNA synthetase                     | -4.44 |
| Mtr.9679.1.S1_at    | Thioredoxin 3                                | -4.44 |
| Mtr.1092.1.S1_at    | ABC transporter                              | -4.43 |
| Mtr.45276.1.S1_at   | LIM domain containing protein                | -4.43 |
| Mtr.15418.1.S1_at   | Histone deacetylase                          | -4.43 |
| Mtr.10656.1.S1_at   | Sucrose-phosphate synthase                   | -4.43 |
| Mtr.33111.1.S1_at   | Hypothetical protein                         | -4.43 |
| Mtr.5125.1.S1_s_at  | Isoflavone reductase                         | -4.42 |
| Mtr.43995.1.S1_at   | Hypothetical protein                         | -4.42 |
| Mtr.33105.1.S1_at   | Hypothetical protein                         | -4.42 |
| Mtr.22791.1.S1_at   | UDP-glucose pyrophosphorylase                | -4.42 |
| Mtr.47389.1.S1_at   | Hypothetical protein                         | -4.41 |
| Mtr.45509.1.S1_at   | Hypothetical protein                         | -4.41 |
| Mtr.10186.1.S1_at   | Hypothetical protein                         | -4.41 |
| Mtr.40332.1.S1_at   | 5,10-methylenetetrahydrofolate dehydrogenase | -4.41 |
| Mtr.9095.1.S1_at    | 30S ribosomal protein S9                     | -4.41 |

|                     |                                                                  |       |
|---------------------|------------------------------------------------------------------|-------|
| Mtr.12803.1.S1_at   | Pyridoxamine 5-phosphate oxidase                                 | -4.41 |
| Mtr.35932.1.S1_at   | Na <sup>+</sup> /H <sup>+</sup> antiporter                       | -4.40 |
| Mtr.49926.1.S1_at   | Mitochondrial carrier protein                                    | -4.40 |
| Mtr.49527.1.S1_at   | Lipolytic enzyme                                                 | -4.40 |
| Mtr.4981.1.S1_at    | Dehydration-responsive protein                                   | -4.40 |
| Mtr.37849.1.S1_at   | Fe-superoxide dismutase                                          | -4.40 |
| Mtr.6699.1.S1_at    | Lhcb2 protein (Light harvesting chlorophyll a/b-binding protein) | -4.40 |
| Mtr.49774.1.S1_at   | Auxin responsive SAUR protein                                    | -4.38 |
| Msa.1658.1.S1_at    | Hypothetical protein                                             | -4.38 |
| Mtr.32040.1.S1_at   | Hypothetical protein                                             | -4.38 |
| Mtr.553.1.S1_at     | Hypothetical protein                                             | -4.38 |
| Mtr.43492.1.S1_at   | Hypothetical protein                                             | -4.37 |
| Mtr.45329.1.S1_at   | Protein kinase                                                   | -4.37 |
| Mtr.12143.1.S1_at   | Hypothetical protein                                             | -4.37 |
| Mtr.9855.1.S1_at    | Hypothetical protein                                             | -4.37 |
| Mtr.9284.1.S1_at    | Hypothetical protein                                             | -4.37 |
| Msa.3138.1.S1_at    | Hypothetical protein                                             | -4.37 |
| Mtr.19329.1.S1_at   | Hypothetical protein                                             | -4.37 |
| Mtr.43427.1.S1_at   | Hypothetical protein                                             | -4.37 |
| Mtr.9651.1.S1_at    | Transcription factor                                             | -4.36 |
| Mtr.38029.1.S1_at   | Chloroplast 50S ribosomal protein L31                            | -4.36 |
| Mtr.28730.1.S1_at   | En/Spm-like transposon protein                                   | -4.36 |
| Msa.2936.1.S1_at    | Hypothetical protein                                             | -4.35 |
| Mtr.18153.1.S1_at   | Hypothetical protein                                             | -4.35 |
| Msa.2836.1.S1_at    | Hypothetical protein                                             | -4.35 |
| Mtr.51659.1.S1_at   | Hypothetical protein                                             | -4.35 |
| Mtr.4792.1.S1_at    | Leaf ubiquitous urease                                           | -4.35 |
| Mtr.37175.1.S1_at   | Chlorophyll a/b binding protein                                  | -4.35 |
| Mtr.33726.1.S1_at   | Sugar transporter-like protein                                   | -4.35 |
| Mtr.37336.1.S1_at   | RNA-binding protein 2                                            | -4.34 |
| Mtr.35494.1.S1_at   | Hypothetical protein                                             | -4.34 |
| Mtr.13750.1.S1_at   | Ent-kaurenoic acid hydroxylase                                   | -4.34 |
| Mtr.9793.1.S1_at    | 4-coumarate-CoA ligase                                           | -4.34 |
| Mtr.43083.1.S1_s_at | Phosphoglucomutase                                               | -4.34 |
| Mtr.20942.1.S1_x_at | Serine/threonine protein kinase                                  | -4.34 |
| Mtr.10248.1.S1_at   | Peroxidase                                                       | -4.34 |
| Mtr.17374.1.S1_at   | C4-dicarboxylate transporter/malic acid transport protein        | -4.33 |
| Msa.3084.1.S1_at    | Hypothetical protein                                             | -4.33 |
| Mtr.5253.1.S1_s_at  | Hypothetical protein                                             | -4.33 |
| Mtr.27203.1.S1_at   | Hypothetical protein                                             | -4.32 |
| Mtr.6724.1.S1_at    | Hypothetical protein                                             | -4.32 |
| Mtr.9728.1.S1_at    | Hypothetical protein                                             | -4.32 |
| Mtr.19007.1.S1_at   | Barwin-related endoglucanase                                     | -4.32 |
| Mtr.19679.1.S1_s_at | Phospholipase/Carboxylesterase                                   | -4.32 |
| Mtr.49120.1.S1_s_at | Cysteine synthase A                                              | -4.32 |
| Mtr.12363.1.S1_at   | Hypothetical protein                                             | -4.32 |
| Mtr.11841.1.S1_at   | Lecithine cholesterol acyltransferase                            | -4.31 |
| Mtr.10198.1.S1_at   | Phosphoenolpyruvate carboxylase                                  | -4.31 |
| Mtr.10917.1.S1_at   | Cytochrome P450 77A3                                             | -4.31 |
| Mtr.34451.1.S1_at   | Hypothetical protein                                             | -4.31 |
| Mtr.40408.1.S1_at   | Photosystem II                                                   | -4.31 |
| Mtr.27207.1.S1_s_at | Hypothetical protein                                             | -4.30 |
| Mtr.42357.1.S1_at   | Hypothetical protein                                             | -4.30 |
| Mtr.5029.1.S1_at    | Hypothetical protein                                             | -4.30 |

|                     |                                                                         |       |
|---------------------|-------------------------------------------------------------------------|-------|
| Mtr.27078.1.S1_at   | Selenium-binding protein                                                | -4.30 |
| Mtr.19577.1.S1_s_at | Aldehyde decarboxylase                                                  | -4.30 |
| Mtr.48940.1.S1_at   | Protein phosphatase 2C                                                  | -4.30 |
| Mtr.27854.1.S1_s_at | NADP-dependent oxidoreductase P1                                        | -4.29 |
| Mtr.48994.1.S1_at   | Hypothetical protein                                                    | -4.29 |
| Mtr.43518.1.S1_at   | Plastidic cysteine synthase 1                                           | -4.29 |
| Mtr.44721.1.S1_at   | Rust resistance kinase Lr10                                             | -4.29 |
| Mtr.49166.1.S1_at   | Short-chain dehydrogenase/reductase                                     | -4.28 |
| Mtr.38453.1.S1_at   | Proline-rich protein                                                    | -4.28 |
| Mtr.34176.1.S1_at   | Hypothetical protein                                                    | -4.28 |
| Mtr.46448.1.S1_s_at | Hypothetical protein                                                    | -4.28 |
| Mtr.25077.1.S1_at   | Hypothetical protein                                                    | -4.28 |
| Mtr.13648.1.S1_at   | Hypothetical protein                                                    | -4.28 |
| Mtr.41052.1.S1_at   | RING zinc finger protein                                                | -4.28 |
| Mtr.15256.1.S1_at   | RNA-binding region RNP-1                                                | -4.27 |
| Mtr.33506.1.S1_at   | Hypothetical protein                                                    | -4.27 |
| Mtr.41461.1.S1_at   | Hypothetical protein                                                    | -4.27 |
| Mtr.43677.1.S1_at   | 50S ribosomal protein L5                                                | -4.27 |
| Mtr.37442.1.S1_at   | Alcohol dehydrogenase 1                                                 | -4.27 |
| Mtr.33027.1.S1_at   | Hypothetical protein                                                    | -4.26 |
| Mtr.44561.1.S1_at   | Threonine synthase                                                      | -4.26 |
| Mtr.32024.1.S1_at   | Hypothetical protein                                                    | -4.26 |
| Mtr.10800.1.S1_at   | Hypothetical protein                                                    | -4.26 |
| Mtr.24083.1.S1_s_at | Uroporphyrinogen decarboxylase                                          | -4.26 |
| Mtr.11319.1.S1_at   | Hypothetical protein                                                    | -4.25 |
| Mtr.31577.1.S1_at   | Phosphoribosylformimino-5-aminoimidazole carboxamide ribotide isomerase | -4.25 |
| Mtr.7450.1.S1_at    | Hypothetical protein                                                    | -4.25 |
| Mtr.32688.1.S1_at   | Hypothetical protein                                                    | -4.25 |
| Mtr.13372.1.S1_at   | Hypothetical protein                                                    | -4.25 |
| Mtr.37642.1.S1_at   | NADP-dependent oxidoreductase P2                                        | -4.25 |
| Mtr.9263.1.S1_at    | Glycine-tRNA ligase                                                     | -4.25 |
| Mtr.43678.1.S1_at   | Hypothetical protein                                                    | -4.24 |
| Mtr.5745.1.S1_at    | Receptor-like protein kinase                                            | -4.24 |
| Mtr.37436.1.S1_at   | Hypersensitive-induced response protein                                 | -4.24 |
| Mtr.44590.1.S1_s_at | Glycuronosyltransferase-like protein                                    | -4.24 |
| Msa.2909.1.S1_at    | Hypothetical protein                                                    | -4.23 |
| Mtr.9820.1.S1_at    | MADS box protein GHMADS-2                                               | -4.23 |
| Mtr.38346.1.S1_at   | Hypothetical protein                                                    | -4.23 |
| Mtr.44280.1.S1_at   | Avr9/Cf-9 induced kinase 1                                              | -4.23 |
| Msa.2963.1.S1_s_at  | Hypothetical protein                                                    | -4.23 |
| Mtr.6751.1.S1_at    | Hypothetical protein                                                    | -4.22 |
| Mtr.1035.1.S1_at    | Heat shock protein                                                      | -4.22 |
| Mtr.37406.1.S1_at   | Hypothetical protein                                                    | -4.22 |
| Mtr.39220.1.S1_at   | Methyltransferase                                                       | -4.22 |
| Mtr.8748.1.S1_at    | Methionine synthase                                                     | -4.22 |
| Mtr.34318.1.S1_at   | Receptor-like protein kinase                                            | -4.22 |
| Mtr.6063.1.S1_at    | Glucosyltransferase                                                     | -4.21 |
| Mtr.5242.1.S1_at    | Cellulose synthase                                                      | -4.21 |
| Msa.1378.1.S1_at    | Hypothetical protein                                                    | -4.21 |
| Mtr.7932.1.S1_s_at  | Allyl alcohol dehydrogenase                                             | -4.21 |
| Mtr.43636.1.S1_at   | Fructose-6-phosphate 2-kinase                                           | -4.21 |
| Mtr.43250.1.S1_at   | Subtilisin-like protease                                                | -4.21 |
| Mtr.9857.1.S1_at    | Hypothetical protein                                                    | -4.21 |
| Mtr.39618.1.S1_at   | Prolyl tRNA synthetase                                                  | -4.21 |

|                     |                                                          |       |
|---------------------|----------------------------------------------------------|-------|
| Mtr.13924.1.S1_at   | Glucosyltransferase like protein                         | -4.20 |
| Mtr.8908.1.S1_at    | Hypothetical protein                                     | -4.20 |
| Msa.3181.1.S1_at    | Hypothetical protein                                     | -4.20 |
| Mtr.32057.1.S1_at   | Hypothetical protein                                     | -4.20 |
| Mtr.1427.1.S1_at    | Hypothetical protein                                     | -4.19 |
| Mtr.40545.1.S1_at   | HSP associated protein                                   | -4.18 |
| Mtr.7633.1.S1_at    | Hypothetical protein                                     | -4.18 |
| Mtr.8503.1.S1_at    | Photosystem II reaction center W protein                 | -4.18 |
| Mtr.16895.1.S1_at   | Hypothetical protein                                     | -4.18 |
| Mtr.6854.1.S1_at    | Two-component system sensor histidine kinase             | -4.18 |
| Mtr.8870.1.S1_at    | Cytochrome P450 monooxygenase                            | -4.18 |
| Msa.984.1.S1_at     | Hypothetical protein                                     | -4.18 |
| Mtr.33880.1.S1_s_at | Hypothetical protein                                     | -4.18 |
| Mtr.38980.1.S1_at   | Isopiperitenone reductase                                | -4.17 |
| Mtr.42121.1.S1_at   | 1-aminocyclopropane-1-carboxylate synthase               | -4.17 |
| Mtr.40121.1.S1_at   | Peroxidase1C                                             | -4.17 |
| Mtr.45183.1.S1_at   | Hyaluronan mediated motility receptor                    | -4.17 |
| Mtr.34408.1.S1_s_at | Hypothetical protein                                     | -4.17 |
| Mtr.13869.1.S1_at   | Calcium-activated outward-rectifying potassium channel 5 | -4.17 |
| Mtr.13202.1.S1_at   | Cellulose synthase CesA-1                                | -4.17 |
| Mtr.32657.1.S1_s_at | Beta-amylase                                             | -4.17 |
| Mtr.28982.1.S1_at   | Hypothetical protein                                     | -4.16 |
| Mtr.20868.1.S1_at   | Glycoside hydrolase                                      | -4.16 |
| Mtr.34220.1.S1_at   | Hypothetical protein                                     | -4.15 |
| Mtr.42820.1.S1_at   | RING/C3HC4/PHD zinc finger                               | -4.15 |
| Mtr.38478.1.S1_at   | Hypothetical protein                                     | -4.15 |
| Msa.1138.1.S1_at    | Hypothetical protein                                     | -4.15 |
| Mtr.31405.1.S1_at   | CDR1                                                     | -4.15 |
| Mtr.51973.1.S1_at   | Seed maturation protein                                  | -4.15 |
| Mtr.41864.1.S1_at   | Hypothetical protein                                     | -4.14 |
| Mtr.33046.1.S1_at   | Hypothetical protein                                     | -4.14 |
| Mtr.28632.1.S1_at   | Hypothetical protein                                     | -4.14 |
| Mtr.11798.1.S1_at   | Cellulose synthase                                       | -4.14 |
| Mtr.27903.1.S1_at   | High mobility group protein 1                            | -4.14 |
| Mtr.20900.1.S1_at   | Hypothetical protein                                     | -4.14 |
| Mtr.43596.1.S1_at   | Plastid ribosomal protein L19                            | -4.13 |
| Mtr.39493.1.S1_at   | Squamosa promoter binding protein-like 8                 | -4.12 |
| Mtr.16430.1.S1_at   | Hypothetical protein                                     | -4.12 |
| Mtr.9623.1.S1_at    | Hypothetical protein                                     | -4.12 |
| Mtr.24954.1.S1_s_at | Protein kinase                                           | -4.12 |
| Mtr.29094.1.S1_s_at | Hypothetical protein                                     | -4.11 |
| Mtr.34499.1.S1_at   | Hypothetical protein                                     | -4.11 |
| Mtr.12407.1.S1_at   | Glutamate decarboxylase                                  | -4.11 |
| Mtr.24235.1.S1_at   | Hypothetical protein                                     | -4.11 |
| Mtr.39152.1.S1_at   | Mitochondrial half-ABC transporter                       | -4.10 |
| Mtr.3096.1.S1_at    | Glycosyl hydrolase                                       | -4.10 |
| Mtr.6112.1.S1_at    | Cytochrome P450                                          | -4.10 |
| Mtr.42749.1.S1_at   | Late embryogenesis abundant protein 1                    | -4.10 |
| Mtr.9891.1.S1_at    | Hypothetical protein                                     | -4.10 |
| Mtr.42054.1.S1_at   | Glu-tRNA(Gln) amidotransferase subunit A                 | -4.10 |
| Mtr.40151.1.S1_at   | Cellulose synthase                                       | -4.10 |
| Mtr.31183.1.S1_x_at | Long-chain acyl-CoA synthetase 6                         | -4.09 |
| Mtr.49014.1.S1_at   | SNO glutamine amidotransferase                           | -4.09 |
| Mtr.41015.1.S1_at   | Hypothetical protein                                     | -4.09 |

|                     |                                                |       |
|---------------------|------------------------------------------------|-------|
| Msa.2740.1.S1_at    | Hypothetical protein                           | -4.09 |
| Msa.579.1.S1_at     | Hypothetical protein                           | -4.09 |
| Mtr.51597.1.S1_s_at | Hypothetical protein                           | -4.08 |
| Mtr.10452.1.S1_at   | Hypothetical protein                           | -4.08 |
| Mtr.28467.1.S1_s_at | Aspartyl aminopeptidase                        | -4.08 |
| Mtr.6148.1.S1_x_at  | Serine carboxypeptidase II-2                   | -4.08 |
| Mtr.40395.1.S1_at   | MtN29 protein                                  | -4.08 |
| Mtr.8454.1.S1_at    | Hypothetical protein                           | -4.08 |
| Mtr.43725.1.S1_at   | 50S ribosomal protein L24                      | -4.08 |
| Mtr.24829.1.S1_at   | Hypothetical protein                           | -4.08 |
| Mtr.12114.1.S1_at   | Cyclophilin-40                                 | -4.08 |
| Mtr.32928.1.S1_s_at | Hypothetical protein                           | -4.08 |
| Mtr.49845.1.S1_at   | Hypothetical protein                           | -4.08 |
| Mtr.34714.1.S1_at   | Hypothetical protein                           | -4.07 |
| Mtr.40653.1.S1_at   | Hypothetical protein                           | -4.07 |
| Mtr.14580.1.S1_at   | Zn-finger, RING                                | -4.07 |
| Mtr.36941.1.S1_at   | Hypothetical protein                           | -4.07 |
| Mtr.7035.1.S1_at    | Hypothetical protein                           | -4.07 |
| Mtr.38413.1.S1_at   | Myb-related transcription factor               | -4.07 |
| Mtr.41142.1.S1_at   | ABC transporter                                | -4.07 |
| Mtr.39702.1.S1_at   | Hypothetical protein                           | -4.06 |
| Mtr.41992.1.S1_at   | Endo-beta-N-acetylglucosaminidase              | -4.06 |
| Mtr.10835.1.S1_s_at | Hypothetical protein                           | -4.06 |
| Mtr.12644.1.S1_at   | Fiber protein Fb34                             | -4.05 |
| Mtr.27917.1.S1_s_at | Yippee-like protein                            | -4.05 |
| Mtr.2385.1.S1_at    | Hypothetical protein                           | -4.05 |
| Mtr.22750.1.S1_at   | Hypothetical protein                           | -4.05 |
| Mtr.51607.1.S1_at   | Hypothetical protein                           | -4.05 |
| Mtr.46659.1.S1_at   | Hypothetical protein                           | -4.04 |
| Mtr.1962.1.S1_at    | MRP-like ABC transporter                       | -4.04 |
| Mtr.8807.1.S1_at    | Phospholipase-like protein                     | -4.03 |
| Mtr.10312.1.S1_at   | Phytochelatin synthetase                       | -4.03 |
| Mtr.13998.1.S1_at   | Hypothetical protein                           | -4.03 |
| Mtr.18312.1.S1_at   | Lipase                                         | -4.03 |
| Mtr.40545.1.S1_a_at | HSP associated protein                         | -4.03 |
| Mtr.50857.1.S1_s_at | Peptidase S10                                  | -4.03 |
| Mtr.41769.1.S1_at   | Hypothetical protein                           | -4.03 |
| Mtr.40998.1.S1_at   | Hypothetical protein                           | -4.02 |
| Mtr.6074.1.S1_at    | Valine-tRNA ligase                             | -4.02 |
| Mtr.43590.1.S1_at   | Hypothetical protein                           | -4.02 |
| Mtr.41929.1.S1_at   | Phenylalanine-tRNA synthetase                  | -4.02 |
| Mtr.20309.1.S1_at   | H <sup>+</sup> -transporting two-sector ATPase | -4.02 |
| Mtr.35857.1.S1_at   | Hypothetical protein                           | -4.02 |
| Mtr.5656.1.S1_at    | Vacuolar H <sup>+</sup> -ATPase B subunit      | -4.02 |
| Msa.1632.1.S1_at    | Hypothetical protein                           | -4.02 |
| Mtr.43488.1.S1_at   | Hypothetical protein                           | -4.02 |
| Mtr.38754.1.S1_at   | Chloride channel protein                       | -4.02 |
| Mtr.41025.1.S1_at   | Hypothetical protein                           | -4.02 |
| Mtr.50562.1.S1_s_at | Zn-finger, Dof type                            | -4.02 |
| Mtr.50527.1.S1_at   | Hypothetical protein                           | -4.01 |
| Mtr.12805.1.S1_at   | Hypothetical protein                           | -4.01 |
| Mtr.43459.1.S1_at   | Hypothetical protein                           | -4.01 |
| Msa.2987.1.S1_at    | Hypothetical protein                           | -4.01 |
| Mtr.7078.1.S1_s_at  | Peroxidase                                     | -4.01 |

|                     |                                                 |       |
|---------------------|-------------------------------------------------|-------|
| Mtr.24451.1.S1_at   | Hypothetical protein                            | -4.00 |
| Mtr.44402.1.S1_at   | Hypothetical protein                            | -4.00 |
| Msa.1614.1.S1_at    | Hypothetical protein                            | -4.00 |
| Mtr.21847.1.S1_at   | Hypothetical protein                            | -4.00 |
| Mtr.41151.1.S1_at   | Cer2 protein                                    | -3.99 |
| Mtr.37912.1.S1_at   | Allyl alcohol dehydrogenase                     | -3.99 |
| Mtr.4063.1.S1_at    | Hypothetical protein                            | -3.99 |
| Mtr.40525.1.S1_at   | Hypothetical protein                            | -3.99 |
| Mtr.33744.1.S1_at   | Hypothetical protein                            | -3.99 |
| Mtr.29088.1.S1_at   | Hypothetical protein                            | -3.99 |
| Mtr.28159.1.S1_at   | AP2 domain transcription factor                 | -3.98 |
| Mtr.39884.1.S1_at   | Hypothetical protein                            | -3.98 |
| Mtr.12922.1.S1_at   | Hypothetical protein                            | -3.98 |
| Mtr.12725.1.S1_at   | Mucin-like protein                              | -3.98 |
| Mtr.7159.1.S1_at    | Hypothetical protein                            | -3.98 |
| Mtr.18014.1.S1_at   | L-lactate dehydrogenase                         | -3.98 |
| Mtr.37814.1.S1_at   | CONSTANS-like protein                           | -3.97 |
| Mtr.50712.1.S1_at   | Hypothetical protein                            | -3.97 |
| Mtr.10510.1.S1_s_at | Cytochrome b6f complex subunit                  | -3.97 |
| Mtr.27444.1.S1_at   | Hypothetical protein                            | -3.97 |
| Mtr.40191.1.S1_at   | Transcription factor EREBP-like protein         | -3.97 |
| Mtr.6728.1.S1_at    | Cytochrome P450 protein                         | -3.96 |
| Mtr.31537.1.S1_at   | Hypothetical protein                            | -3.96 |
| Mtr.50173.1.S1_at   | Hypothetical protein                            | -3.96 |
| Mtr.17362.1.S1_at   | Beta-Ig-H3/fasciclin                            | -3.96 |
| Mtr.35162.1.S1_at   | Hypothetical protein                            | -3.96 |
| Msa.1600.1.S1_at    | Hypothetical protein                            | -3.96 |
| Mtr.50484.1.S1_s_at | Peptidase M18                                   | -3.96 |
| Mtr.7553.1.S1_at    | Alanine acetyl transferase                      | -3.95 |
| Mtr.5862.1.S1_at    | Photosystem II 22 kDa protein                   | -3.95 |
| Mtr.42769.1.S1_at   | Hypothetical protein                            | -3.95 |
| Mtr.9315.1.S1_at    | TRANSPARENT TESTA 12 protein                    | -3.95 |
| Mtr.16385.1.S1_s_at | Hypothetical protein                            | -3.95 |
| Mtr.25344.1.S1_at   | Hypothetical protein                            | -3.95 |
| Mtr.15048.1.S1_s_at | HAD-superfamily subfamily IIA hydrolase         | -3.95 |
| Mtr.35361.1.S1_at   | Fructose-6-phosphate 2-kinase                   | -3.95 |
| Mtr.42285.1.S1_at   | Phosphoglycerate mutase                         | -3.95 |
| Mtr.41311.1.S1_at   | Hypothetical protein                            | -3.95 |
| Mtr.34788.1.S1_at   | Glyceraldehyde-3-phosphate dehydrogenase (NADP) | -3.94 |
| Mtr.9586.1.S1_at    | Hypothetical protein                            | -3.94 |
| Mtr.12375.1.S1_at   | Photosystem I reaction center subunit III       | -3.94 |
| Msa.1635.1.S1_at    | Hypothetical protein                            | -3.94 |
| Mtr.16346.1.S1_at   | Hypothetical protein                            | -3.94 |
| Mtr.9049.1.S1_at    | Sbp65a protein                                  | -3.94 |
| Mtr.19730.1.S1_s_at | Microtubule-associated protein                  | -3.94 |
| Mtr.7060.1.S1_at    | Hypothetical protein                            | -3.94 |
| Mtr.20212.1.S1_s_at | Aspartate/glutamate/uridylylate kinase          | -3.94 |
| Mtr.38268.1.S1_at   | Hypothetical protein                            | -3.93 |
| Mtr.5449.1.S1_at    | Hypothetical protein                            | -3.93 |
| Mtr.5274.1.S1_s_at  | Cellulose synthase                              | -3.93 |
| Mtr.41476.1.S1_at   | Cytochrome P450 71D11                           | -3.93 |
| Mtr.47027.1.S1_at   | Ubiquitin-conjugating enzyme                    | -3.92 |
| Mtr.732.1.S1_s_at   | Phosphoglucomutase                              | -3.92 |
| Mtr.36687.1.S1_at   | Hypothetical protein                            | -3.92 |

|                     |                                                          |       |
|---------------------|----------------------------------------------------------|-------|
| Mtr.29047.1.S1_at   | Hypothetical protein                                     | -3.92 |
| Mtr.35868.1.S1_at   | Hypothetical protein                                     | -3.92 |
| Mtr.25786.1.S1_at   | Hypothetical protein                                     | -3.92 |
| Mtr.24495.1.S1_at   | Photosystem II 32 kDa protein                            | -3.92 |
| Mtr.2596.1.S1_at    | Protein kinase                                           | -3.91 |
| Mtr.13516.1.S1_s_at | ZF-HD homeobox protein                                   | -3.91 |
| Mtr.45048.1.S1_s_at | Hypothetical protein                                     | -3.91 |
| Mtr.29878.1.S1_at   | Hypothetical protein                                     | -3.91 |
| Mtr.7873.1.S1_at    | Ribonuclease HII                                         | -3.90 |
| Mtr.42172.1.S1_s_at | Cytochrome P450                                          | -3.90 |
| Mtr.45399.1.S1_at   | Hypothetical protein                                     | -3.90 |
| Mtr.50318.1.S1_at   | Cys/Met metabolism pyridoxal-phosphate-dependent enzymes | -3.90 |
| Mtr.26276.1.S1_at   | CER1 protein                                             | -3.90 |
| Mtr.44644.1.S1_s_at | Hydrolase-like protein                                   | -3.90 |
| Mtr.36903.1.S1_at   | Hypothetical protein                                     | -3.90 |
| Mtr.40844.1.S1_at   | Diphosphonucleotide phosphatase 1                        | -3.90 |
| Mtr.23750.1.S1_at   | Hypothetical protein                                     | -3.90 |
| Mtr.42878.1.S1_at   | Hypothetical protein                                     | -3.90 |
| Mtr.33436.1.S1_at   | Hypothetical protein                                     | -3.89 |
| Mtr.40343.1.S1_s_at | Dihydrofolate reductas                                   | -3.89 |
| Mtr.2083.1.S1_s_at  | Glutamate decarboxylase 1                                | -3.89 |
| Mtr.25726.1.S1_s_at | Hypothetical protein                                     | -3.88 |
| Mtr.28571.1.S1_at   | Phosphoribosylanthranilate transferase                   | -3.88 |
| Msa.2726.1.S1_at    | Hypothetical protein                                     | -3.88 |
| Mtr.22143.1.S1_at   | Acetolactate synthase                                    | -3.87 |
| Mtr.11893.1.S1_at   | 4-Diphosphocytidyl-2C-methyl-D-erythritol synthase       | -3.87 |
| Mtr.20499.1.S1_at   | Phosphatidylinositol-4-phosphate 5-kinase                | -3.87 |
| Mtr.44552.1.S1_at   | Hypothetical protein                                     | -3.87 |
| Mtr.8532.1.S1_at    | Alpha-expansin 3                                         | -3.87 |
| Mtr.24331.1.S1_s_at | Hypothetical protein                                     | -3.86 |
| Mtr.43421.1.S1_at   | Hypothetical protein                                     | -3.86 |
| Mtr.17456.1.S1_at   | Hypothetical protein                                     | -3.86 |
| Mtr.15141.1.S1_at   | Hypothetical protein                                     | -3.86 |
| Mtr.17396.1.S1_s_at | Cellulose synthase                                       | -3.86 |
| Msa.1301.1.S1_at    | Hypothetical protein                                     | -3.86 |
| Mtr.43528.1.S1_at   | Fructokinase 3                                           | -3.86 |
| Mtr.33519.1.S1_at   | Cold acclimation responsive protein                      | -3.86 |
| Mtr.1806.1.S1_s_at  | Hypothetical protein                                     | -3.85 |
| Mtr.4867.1.S1_s_at  | Zygosaccharomyces rouxii pheromone response protein      | -3.85 |
| Mtr.36799.1.S1_s_at | Hypothetical protein                                     | -3.85 |
| Mtr.32655.1.S1_at   | Hypothetical protein                                     | -3.85 |
| Mtr.27813.1.S1_at   | 6-4 photolyase                                           | -3.85 |
| Msa.1391.1.S1_at    | Hypothetical protein                                     | -3.85 |
| Mtr.49013.1.S1_at   | Hypothetical protein                                     | -3.85 |
| Mtr.13357.1.S1_at   | EspB-like protein                                        | -3.84 |
| Mtr.6757.1.S1_at    | Thaumatococcus-like protein                              | -3.84 |
| Mtr.12787.1.S1_at   | Membrane-associated 30 kDa protein                       | -3.84 |
| Mtr.44288.1.S1_at   | Hypothetical protein                                     | -3.84 |
| Mtr.7486.1.S1_at    | Zinc finger protein                                      | -3.84 |
| Mtr.8707.1.S1_at    | Hypothetical protein                                     | -3.84 |
| Mtr.41014.1.S1_at   | Hypothetical protein                                     | -3.84 |
| Mtr.32192.1.S1_at   | Hypothetical protein                                     | -3.84 |
| Mtr.41982.1.S1_at   | Sulfate transporter ATST1                                | -3.83 |
| Mtr.12978.1.S1_at   | 3-hydroxyisobutyrate dehydrogenase                       | -3.83 |



|                     |                                                 |       |
|---------------------|-------------------------------------------------|-------|
| Mtr.26689.1.S1_at   | Serine/threonine protein kinase                 | -3.83 |
| Mtr.43458.1.S1_s_at | Hypothetical protein                            | -3.83 |
| Mtr.4126.1.S1_at    | Laccase                                         | -3.83 |
| Mtr.13194.1.S1_s_at | RanGAP1 interacting protein                     | -3.83 |
| Mtr.44607.1.S1_at   | Pyrroline-5-carboxylate synthetase 2            | -3.83 |
| Mtr.34726.1.S1_at   | Photosystem I reaction center subunit II        | -3.83 |
| Mtr.10347.1.S1_at   | Receptor-like protein kinase                    | -3.83 |
| Mtr.36413.1.S1_at   | Hypothetical protein                            | -3.82 |
| Mtr.38367.1.S1_at   | Hypothetical protein                            | -3.82 |
| Mtr.4975.1.S1_s_at  | SRG1 protein                                    | -3.82 |
| Mtr.44678.1.S1_at   | Hypothetical protein                            | -3.82 |
| Msa.1209.1.S1_at    | Hypothetical protein                            | -3.82 |
| Mtr.7840.1.S1_at    | Hypothetical protein                            | -3.82 |
| Mtr.51453.1.S1_at   | Hypothetical protein                            | -3.81 |
| Mtr.13051.1.S1_at   | Glucose-6-phosphate 1-dehydrogenase 1           | -3.81 |
| Mtr.12218.1.S1_at   | Cytochrome B6-F complex iron-sulfur subunit     | -3.81 |
| Mtr.45513.1.S1_at   | Hypothetical protein                            | -3.80 |
| Mtr.14002.1.S1_at   | Calcium binding protein                         | -3.80 |
| Mtr.25980.1.S1_s_at | Hypothetical protein                            | -3.80 |
| Mtr.49776.1.S1_x_at | Auxin responsive SAUR protein                   | -3.80 |
| Mtr.13136.1.S1_at   | Fasciclin-like AGP 10                           | -3.80 |
| Mtr.7841.1.S1_at    | Hypothetical protein                            | -3.79 |
| Mtr.22161.1.S1_at   | Hypothetical protein                            | -3.79 |
| Mtr.6710.1.S1_at    | MYB transcription factor                        | -3.79 |
| Mtr.39462.1.S1_at   | Glu-tRNA(Gln) amidotransferase subunit A        | -3.79 |
| Mtr.39920.1.S1_at   | Receptor like protein                           | -3.79 |
| Mtr.29366.1.S1_at   | Serine/threonine protein kinase                 | -3.79 |
| Mtr.38303.1.S1_at   | Hypothetical protein                            | -3.79 |
| Mtr.39027.1.S1_at   | Hypothetical protein                            | -3.78 |
| Mtr.1744.1.S1_at    | CRS2-associated factor 2                        | -3.78 |
| Mtr.6773.1.S1_at    | Myosin heavy chain-like protein                 | -3.78 |
| Mtr.43598.1.S1_at   | Polygalacturonase-like protein                  | -3.78 |
| Mtr.4292.1.S1_at    | Beta-galactosidase                              | -3.78 |
| Mtr.8220.1.S1_at    | Hypothetical protein                            | -3.78 |
| Mtr.8775.1.S1_at    | Hypothetical protein                            | -3.78 |
| Msa.1594.1.S1_at    | Hypothetical protein                            | -3.77 |
| Mtr.9854.1.S1_at    | Hypothetical protein                            | -3.77 |
| Mtr.40816.1.S1_at   | Thylakoid lumenal 15 kDa protein                | -3.77 |
| Mtr.24581.1.S1_s_at | 1,2-diaclyglycerol 3-beta-galactosyltransferase | -3.77 |
| Mtr.32523.1.S1_at   | Peptide transporter                             | -3.77 |
| Mtr.43311.1.S1_at   | BURP domain-containing protein                  | -3.77 |
| Mtr.5622.1.S1_at    | Hypothetical protein                            | -3.76 |
| Mtr.15765.1.S1_at   | Hypothetical protein                            | -3.76 |
| Msa.1951.1.S1_s_at  | Hypothetical protein                            | -3.76 |
| Mtr.11444.1.S1_at   | Receptor-like protein kinase                    | -3.76 |
| Mtr.33858.1.S1_at   | Metal-transporting P-type ATPase                | -3.76 |
| Mtr.33470.1.S1_at   | Hypothetical protein                            | -3.76 |
| Mtr.10814.1.S1_at   | Epoxide hydrolase                               | -3.75 |
| Mtr.42737.1.S1_at   | Hypothetical protein                            | -3.75 |
| Mtr.43288.1.S1_at   | Diphenol oxidase                                | -3.75 |
| Mtr.32700.1.S1_s_at | Hypothetical protein                            | -3.75 |
| Mtr.35618.1.S1_at   | Multi resistance protein                        | -3.75 |
| Mtr.5133.1.S1_at    | Hypothetical protein                            | -3.75 |
| Mtr.42232.1.S1_at   | Hypothetical protein                            | -3.75 |

|                     |                                                            |       |
|---------------------|------------------------------------------------------------|-------|
| Mtr.36799.1.S1_at   | Hypothetical protein                                       | -3.75 |
| Mtr.18262.1.S1_at   | Hypothetical protein                                       | -3.75 |
| Mtr.34410.1.S1_at   | Hypothetical protein                                       | -3.74 |
| Mtr.39047.1.S1_at   | RNA helicase-like protein                                  | -3.74 |
| Mtr.17229.1.S1_at   | Na <sup>+</sup> /H <sup>+</sup> antiporter-like protein    | -3.74 |
| Mtr.44265.1.S1_at   | Hypothetical protein                                       | -3.74 |
| Mtr.10451.1.S1_at   | Hypothetical protein                                       | -3.74 |
| Mtr.20815.1.S1_at   | Hypothetical protein                                       | -3.74 |
| Mtr.46334.1.S1_at   | Serine/threonine protein kinase                            | -3.74 |
| Mtr.28691.1.S1_at   | Nine-cis-epoxycarotenoid dioxygenase3                      | -3.74 |
| Mtr.31196.1.S1_at   | Hypothetical protein                                       | -3.74 |
| Mtr.16358.1.S1_at   | Glyoxalase/extradiol ring-cleavage dioxygenase             | -3.73 |
| Mtr.10402.1.S1_at   | Type II chlorophyll a/b binding protein from photosystem I | -3.73 |
| Mtr.38643.1.S1_s_at | Sucrose-phosphate synthase                                 | -3.73 |
| Mtr.23112.1.S1_at   | Chloride channel-like (CLC) protein                        | -3.73 |
| Mtr.38333.1.S1_at   | Hypothetical protein                                       | -3.73 |
| Mtr.4979.1.S1_at    | Hypothetical protein                                       | -3.73 |
| Mtr.10428.1.S1_at   | NADP-specific isocitrate dehydrogenase                     | -3.73 |
| Mtr.43479.1.S1_at   | Hypothetical protein                                       | -3.73 |
| Mtr.43131.1.S1_at   | Endo-beta-1,4-glucanase                                    | -3.72 |
| Mtr.13309.1.S1_at   | Hypothetical protein                                       | -3.72 |
| Mtr.9665.1.S1_at    | Oikosin 4A protein                                         | -3.72 |
| Mtr.42216.1.S1_at   | RanGAP1 interacting protein                                | -3.72 |
| Mtr.17883.1.S1_at   | Hypothetical protein                                       | -3.72 |
| Mtr.10665.1.S1_at   | Hypothetical protein                                       | -3.72 |
| Mtr.1107.1.S1_at    | Pectate lyase                                              | -3.71 |
| Mtr.31153.1.S1_at   | Hypothetical protein                                       | -3.71 |
| Mtr.25499.1.S1_s_at | NifU-related metallocluster assembly factor                | -3.71 |
| Mtr.36224.1.S1_at   | Hypothetical protein                                       | -3.71 |
| Mtr.31189.1.S1_at   | Trehalose-6-phosphate phosphatase                          | -3.71 |
| Msa.509.1.S1_at     | Hypothetical protein                                       | -3.71 |
| Mtr.26982.1.S1_at   | Hypothetical protein                                       | -3.71 |
| Mtr.21612.1.S1_at   | Hypothetical protein                                       | -3.71 |
| Mtr.6279.1.S1_at    | LIM domain containing protein                              | -3.71 |
| Mtr.13288.1.S1_at   | ADP-glucose pyrophosphorylase large subunit                | -3.70 |
| Mtr.12858.1.S1_at   | Hypothetical protein                                       | -3.70 |
| Mtr.39136.1.S1_at   | Hypothetical protein                                       | -3.70 |
| Mtr.38216.1.S1_at   | Hypothetical protein                                       | -3.70 |
| Mtr.42457.1.S1_at   | Hypothetical protein                                       | -3.70 |
| Mtr.5452.1.S1_at    | ABC transporter                                            | -3.70 |
| Mtr.26358.1.S1_at   | Hypothetical protein                                       | -3.70 |
| Mtr.10036.1.S1_at   | Phosphate/phosphoenolpyruvate translocator                 | -3.69 |
| Mtr.44112.1.S1_at   | Uracil phosphoribosyltransferase                           | -3.69 |
| Mtr.26277.1.S1_at   | Lycopene beta-cyclase                                      | -3.69 |
| Mtr.15273.1.S1_at   | Peptidase M14                                              | -3.69 |
| Mtr.48864.1.S1_at   | Zn-finger, Dof type                                        | -3.68 |
| Mtr.13184.1.S1_at   | Prolyl carboxypeptidase like protein                       | -3.68 |
| Mtr.5291.1.S1_at    | Hypothetical protein                                       | -3.68 |
| Mtr.28150.1.S1_at   | Hypothetical protein                                       | -3.68 |
| Mtr.37287.1.S1_s_at | Beta-glucosidase                                           | -3.68 |
| Mtr.41882.1.S1_at   | Hypothetical protein                                       | -3.68 |
| Mtr.5497.1.S1_s_at  | Hypothetical protein                                       | -3.68 |
| Mtr.48836.1.S1_at   | Hypothetical protein                                       | -3.68 |
| Mtr.39226.1.S1_at   | MAP kinase                                                 | -3.67 |

|                     |                                            |       |
|---------------------|--------------------------------------------|-------|
| Mtr.6733.1.S1_at    | Rhomboid family protein                    | -3.67 |
| Mtr.37084.1.S1_at   | HSR203J protein                            | -3.67 |
| Mtr.17822.1.S1_at   | Cytochrome P450                            | -3.67 |
| Mtr.45126.1.S1_at   | Hypothetical protein                       | -3.67 |
| Mtr.28642.1.S1_at   | Hypothetical protein                       | -3.66 |
| Mtr.29065.1.S1_at   | GTP cyclohydrolase I                       | -3.66 |
| Mtr.115.1.S1_at     | Hypothetical protein                       | -3.66 |
| Mtr.20947.1.S1_at   | Serine/threonine protein kinase            | -3.66 |
| Mtr.16234.1.S1_at   | Hypothetical protein                       | -3.66 |
| Mtr.15646.1.S1_at   | Hypothetical protein                       | -3.66 |
| Mtr.26166.1.S1_at   | Heat shock protein                         | -3.65 |
| Mtr.8212.1.S1_at    | Protein kinase                             | -3.65 |
| Mtr.13236.1.S1_at   | Glucose-6-phosphate dehydrogenase          | -3.65 |
| Mtr.44410.1.S1_at   | RNA-binding protein FUS                    | -3.65 |
| Mtr.20939.1.S1_at   | Hypothetical protein                       | -3.65 |
| Mtr.6532.1.S1_s_at  | 3-ketoacyl-ACP synthase                    | -3.65 |
| Msa.1046.1.S1_at    | Hypothetical protein                       | -3.65 |
| Mtr.41314.1.S1_at   | Pyruvate, phosphate dikinase               | -3.64 |
| Mtr.7496.1.S1_at    | Hypothetical protein                       | -3.64 |
| Mtr.8778.1.S1_at    | Hypothetical protein                       | -3.64 |
| Mtr.12200.1.S1_at   | Hypothetical protein                       | -3.64 |
| Mtr.3013.1.S1_at    | UDP-glucuronosyltransferase                | -3.64 |
| Mtr.44368.1.S1_at   | Hypothetical protein                       | -3.64 |
| Mtr.756.1.S1_at     | Hypothetical protein                       | -3.64 |
| Mtr.37615.1.S1_at   | Hypothetical protein                       | -3.64 |
| Mtr.22763.1.S1_at   | Hypothetical protein                       | -3.64 |
| Mtr.9455.1.S1_at    | Hypothetical protein                       | -3.64 |
| Mtr.33398.1.S1_s_at | Hypothetical protein                       | -3.63 |
| Mtr.23870.1.S1_at   | Hypothetical protein                       | -3.63 |
| Mtr.27067.1.S1_at   | DNA binding with one finger 4 protein      | -3.63 |
| Mtr.44825.1.S1_at   | POZ domain protein                         | -3.63 |
| Mtr.5433.1.S1_at    | Hypothetical protein                       | -3.63 |
| Mtr.35648.1.S1_at   | bHLH transcription factor                  | -3.63 |
| Mtr.8614.1.S1_at    | Mitochondrial solute carrier protein       | -3.63 |
| Mtr.20814.1.S1_at   | Zn-finger, CCHC type                       | -3.62 |
| Mtr.10888.1.S1_at   | Hypothetical protein                       | -3.62 |
| Msa.1349.1.S1_at    | Hypothetical protein                       | -3.62 |
| Mtr.38263.1.S1_at   | Hypothetical protein                       | -3.62 |
| Mtr.10826.1.S1_at   | Rho GDP dissociation inhibitor 1           | -3.62 |
| Mtr.13656.1.S1_at   | Galactomannan galactosyltransferase        | -3.62 |
| Mtr.10403.1.S1_at   | Photosystem I reaction center subunit IV A | -3.62 |
| Mtr.27391.1.S1_at   | N-acylethanolamine amidohydrolase          | -3.61 |
| Mtr.39931.1.S1_at   | Hypothetical protein                       | -3.61 |
| Mtr.38311.1.S1_at   | Hypothetical protein                       | -3.61 |
| Mtr.48712.1.S1_s_at | Facilitated glucose transporter            | -3.61 |
| Mtr.16555.1.S1_s_at | Hypothetical protein                       | -3.61 |
| Msa.3107.1.S1_at    | Hypothetical protein                       | -3.61 |
| Mtr.8790.1.S1_at    | Peripheral-type benzodiazepine receptor    | -3.61 |
| Mtr.39691.1.S1_at   | Hypothetical protein                       | -3.61 |
| Mtr.39777.1.S1_at   | Hypothetical protein                       | -3.60 |
| Msa.2735.1.S1_at    | Hypothetical protein                       | -3.60 |
| Mtr.23994.1.S1_at   | Homeodomain transcription                  | -3.60 |
| Mtr.10506.1.S1_at   | GH1 protein                                | -3.60 |
| Mtr.12741.1.S1_at   | Hypothetical protein                       | -3.60 |

|                     |                                               |       |
|---------------------|-----------------------------------------------|-------|
| Mtr.25499.1.S1_at   | NifU-related metallocluster assembly factor   | -3.60 |
| Msa.2906.1.S1_at    | Hypothetical protein                          | -3.60 |
| Mtr.15378.1.S1_at   | Hypothetical protein                          | -3.60 |
| Mtr.27411.1.S1_s_at | Ribonucleoprotein                             | -3.60 |
| Msa.2839.1.S1_at    | Hypothetical protein                          | -3.59 |
| Mtr.8418.1.S1_at    | Xylulose kinase                               | -3.59 |
| Mtr.13733.1.S1_at   | Hypothetical protein                          | -3.59 |
| Mtr.15083.1.S1_at   | Pentaxin                                      | -3.59 |
| Mtr.29167.1.S1_s_at | Hypothetical protein                          | -3.59 |
| Mtr.12617.1.S1_at   | Hypothetical protein                          | -3.59 |
| Mtr.42899.1.S1_a_at | Carboxylesterase                              | -3.59 |
| Mtr.40827.1.S1_at   | Hypothetical protein                          | -3.59 |
| Mtr.44327.1.S1_at   | Adenylate kinase 2                            | -3.58 |
| Mtr.11200.1.S1_at   | Zinc finger protein                           | -3.58 |
| Msa.1509.1.S1_at    | Hypothetical protein                          | -3.58 |
| Msa.1866.1.S1_x_at  | Hypothetical protein                          | -3.58 |
| Mtr.31536.1.S1_at   | Hypothetical protein                          | -3.58 |
| Mtr.43478.1.S1_at   | Serine carboxypeptidase                       | -3.58 |
| Mtr.14183.1.S1_at   | Annexin                                       | -3.58 |
| Mtr.20781.1.S1_at   | Hypothetical protein                          | -3.58 |
| Mtr.30783.1.S1_at   | Cytochrome P450                               | -3.58 |
| Mtr.18939.1.S1_at   | Amino acid/polyamine transporter II           | -3.57 |
| Mtr.46001.1.S1_at   | Hypothetical protein                          | -3.57 |
| Mtr.33630.1.S1_at   | Hypothetical protein                          | -3.57 |
| Mtr.29098.1.S1_at   | Long chain acyl-CoA synthetase 5              | -3.57 |
| Mtr.43980.1.S1_at   | Endopeptidase                                 | -3.57 |
| Mtr.50700.1.S1_s_at | Serine/threonine protein kinase               | -3.56 |
| Mtr.37613.1.S1_at   | Annexin-like protein                          | -3.56 |
| Mtr.27110.1.S1_at   | C2 domain-containing protein                  | -3.56 |
| Mtr.12382.1.S1_at   | Hypothetical protein                          | -3.56 |
| Mtr.8973.1.S1_at    | Hypothetical protein                          | -3.56 |
| Mtr.40237.1.S1_at   | Hypothetical protein                          | -3.56 |
| Mtr.40341.1.S1_at   | Dihydrofolate reductase                       | -3.56 |
| Mtr.40906.1.S1_at   | Quinone oxidoreductase                        | -3.56 |
| Msa.3017.1.S1_at    | Hypothetical protein                          | -3.55 |
| Msa.1448.1.S1_at    | Hypothetical protein                          | -3.55 |
| Mtr.37317.1.S1_at   | Plastocyanin                                  | -3.55 |
| Mtr.15596.1.S1_at   | Hypothetical protein                          | -3.55 |
| Mtr.18703.1.S1_at   | Serine/threonine protein kinase               | -3.55 |
| Mtr.10229.1.S1_at   | EspB-like protein                             | -3.55 |
| Mtr.31183.1.S1_at   | Long-chain acyl-CoA synthetase 6              | -3.55 |
| Mtr.6163.1.S1_at    | Hypothetical protein                          | -3.55 |
| Mtr.17550.1.S1_at   | Plant lipid transfer protein                  | -3.54 |
| Mtr.8509.1.S1_at    | Hypothetical protein                          | -3.54 |
| Mtr.2078.1.S1_at    | Cell death regulator                          | -3.54 |
| Mtr.44411.1.S1_at   | Peptide methionine sulfoxide reductase msrB   | -3.54 |
| Mtr.15321.1.S1_at   | Serine/threonine-specific protein phosphatase | -3.54 |
| Mtr.32558.1.S1_at   | N-acylethanolamine amidohydrolase             | -3.54 |
| Msa.1757.1.S1_at    | Hypothetical protein                          | -3.54 |
| Mtr.41803.1.S1_at   | Hypothetical protein                          | -3.54 |
| Mtr.10507.1.S1_s_at | GH1 protein                                   | -3.54 |
| Msa.3012.1.S1_at    | Hypothetical protein                          | -3.54 |
| Mtr.50427.1.S1_at   | Lipoxygenase                                  | -3.54 |
| Mtr.2549.1.S1_at    | Hypothetical protein                          | -3.53 |

|                     |                                                     |       |
|---------------------|-----------------------------------------------------|-------|
| Msa.1068.1.S1_at    | Hypothetical protein                                | -3.53 |
| Mtr.13662.1.S1_s_at | Protein kinase                                      | -3.53 |
| Msa.2703.1.S1_at    | Hypothetical protein                                | -3.53 |
| Mtr.37908.1.S1_at   | Peroxidase                                          | -3.53 |
| Mtr.25541.1.S1_at   | Hypothetical protein                                | -3.53 |
| Mtr.13230.1.S1_at   | Glycosyl transferase                                | -3.53 |
| Mtr.32901.1.S1_at   | Hypothetical protein                                | -3.53 |
| Mtr.28673.1.S1_at   | Hypothetical protein                                | -3.53 |
| Mtr.28056.1.S1_at   | Hypothetical protein                                | -3.53 |
| Mtr.28405.1.S1_at   | Negative transcription regulator                    | -3.53 |
| Mtr.42999.1.S1_at   | Photosystem I psaH protein                          | -3.52 |
| Mtr.8663.1.S1_at    | Calcium/calmodulin-dependent protein kinase CaMK3   | -3.52 |
| Mtr.8859.1.S1_at    | Proline rich protein                                | -3.52 |
| Mtr.15511.1.S1_at   | Hypothetical protein                                | -3.52 |
| Mtr.34694.1.S1_at   | Hypothetical protein                                | -3.52 |
| Mtr.12439.1.S1_at   | 50S ribosomal protein L27                           | -3.51 |
| Mtr.15297.1.S1_at   | Hypothetical protein                                | -3.51 |
| Mtr.38636.1.S1_s_at | Hydrolase                                           | -3.51 |
| Msa.3135.1.S1_at    | Hypothetical protein                                | -3.51 |
| Mtr.37813.1.S1_s_at | Hypothetical protein                                | -3.51 |
| Mtr.4282.1.S1_at    | HAP3-like transcriptional-activator                 | -3.51 |
| Mtr.16432.1.S1_at   | Myb, DNA-binding                                    | -3.51 |
| Mtr.35464.1.S1_at   | Triose phosphate/phosphate translocator             | -3.51 |
| Mtr.1068.1.S1_s_at  | P-glycoprotein                                      | -3.51 |
| Mtr.12206.1.S1_at   | Ribulose 1,5-bisphosphate carboxylase small subunit | -3.51 |
| Mtr.45998.1.S1_at   | Hypothetical protein                                | -3.51 |
| Mtr.44526.1.S1_at   | Hypothetical protein                                | -3.51 |
| Mtr.46406.1.S1_at   | Hypothetical protein                                | -3.51 |
| Mtr.33116.1.S1_at   | Receptor protein kinase                             | -3.50 |
| Msa.1536.1.S1_at    | Hypothetical protein                                | -3.50 |
| Mtr.43358.1.S1_at   | Outer membrane lipoprotein                          | -3.50 |
| Mtr.39445.1.S1_at   | Polygalacturonase isoenzyme 1 beta subunit          | -3.50 |
| Mtr.40583.1.S1_at   | Polygalacturonase-like protein                      | -3.50 |
| Mtr.2343.1.S1_at    | Hypothetical protein                                | -3.50 |
| Mtr.38045.1.S1_at   | Fiber protein Fb19                                  | -3.50 |
| Mtr.19564.1.S1_s_at | Hypothetical protein                                | -3.49 |
| Mtr.9004.1.S1_at    | Hypothetical protein                                | -3.49 |
| Mtr.9173.1.S1_at    | Hypothetical protein                                | -3.49 |
| Mtr.23748.1.S1_s_at | C3HC4-type zinc finger protein                      | -3.49 |
| Mtr.11805.1.S1_at   | Hypothetical protein                                | -3.49 |
| Mtr.9599.1.S1_at    | Hypothetical protein                                | -3.49 |
| Msa.1612.1.S1_at    | Hypothetical protein                                | -3.49 |
| Mtr.1621.1.S1_at    | Hypothetical protein                                | -3.49 |
| Mtr.38739.1.S1_at   | Receptor-like protein kinase                        | -3.49 |
| Mtr.32736.1.S1_at   | Hypothetical protein                                | -3.49 |
| Mtr.44584.1.S1_at   | Transfactor-like protein                            | -3.48 |
| Mtr.35998.1.S1_at   | cinnamoyl-CoA reductase                             | -3.48 |
| Mtr.49327.1.S1_at   | Hypothetical protein                                | -3.48 |
| Mtr.40308.1.S1_at   | Monofunctional aspartokinase                        | -3.48 |
| Mtr.42201.1.S1_at   | Hypothetical protein                                | -3.48 |
| Mtr.2715.1.S1_s_at  | Hypothetical protein                                | -3.48 |
| Mtr.34418.1.S1_at   | Hypothetical protein                                | -3.48 |
| Mtr.34160.1.S1_at   | Hypothetical protein                                | -3.48 |
| Mtr.8457.1.S1_s_at  | Hypothetical protein                                | -3.47 |

|                      |                                           |       |
|----------------------|-------------------------------------------|-------|
| Mtr.30774.1.S1_at    | Hypothetical protein                      | -3.46 |
| Mtr.34395.1.S1_at    | Hypothetical protein                      | -3.46 |
| Mtr.10227.1.S1_at    | Cytochrome P450                           | -3.46 |
| Mtr.13443.1.S1_at    | Hypothetical protein                      | -3.46 |
| Mtr.10035.1.S1_at    | Hypothetical protein                      | -3.46 |
| Mtr.10662.1.S1_at    | Heat shock 22 kDa protein                 | -3.46 |
| Mtr.22314.1.S1_at    | ATP citrate lyase b-subunit               | -3.46 |
| Mtr.12724.1.S1_at    | PDI-like protein                          | -3.46 |
| Mtr.42323.1.S1_at    | Hypothetical protein                      | -3.46 |
| Mtr.42188.1.S1_at    | Yippee-like protein                       | -3.46 |
| AFFX-Mtr-gsta-M_x_at | 2,4-D inducible glutathione S-transferase | -3.46 |
| Mtr.3440.1.S1_at     | Hypothetical protein                      | -3.46 |
| Mtr.10009.1.S1_at    | Hypothetical protein                      | -3.45 |
| Mtr.50826.1.S1_at    | Beta-ketoacyl synthase                    | -3.45 |
| Mtr.40922.1.S1_at    | Hypothetical protein                      | -3.45 |
| Mtr.39103.1.S1_at    | Peptide deformylase                       | -3.45 |
| Mtr.15836.1.S1_at    | Cycloeucaleenol cycloisomerase            | -3.45 |
| Msa.1725.1.S1_at     | Hypothetical protein                      | -3.45 |
| Mtr.42622.1.S1_s_at  | Maturase                                  | -3.45 |
| Mtr.9328.1.S1_at     | Carboxyl terminal protease                | -3.45 |
| Mtr.51837.1.S1_at    | Thymidylate synthase                      | -3.45 |
| Mtr.19465.1.S1_at    | Thaumatococin                             | -3.45 |
| Mtr.10605.1.S1_at    | Hypothetical protein                      | -3.45 |
| Mtr.24463.1.S1_at    | Hypothetical protein                      | -3.45 |
| Mtr.38468.1.S1_at    | Proline-rich protein                      | -3.44 |
| Mtr.26216.1.S1_at    | Auxin response factor 5                   | -3.44 |
| Mtr.43423.1.S1_at    | Hypothetical protein                      | -3.44 |
| Mtr.39039.1.S1_at    | Ankyrin like protein                      | -3.44 |
| Mtr.9554.1.S1_at     | Histone H4                                | -3.44 |
| Mtr.17339.1.S1_at    | 50s ribosomal protein 118                 | -3.44 |
| Mtr.8568.1.S1_at     | Nitrite reductase                         | -3.44 |
| Mtr.39964.1.S1_at    | Hypothetical protein                      | -3.44 |
| Mtr.712.1.S1_at      | Thioredoxin                               | -3.44 |
| Mtr.11023.1.S1_at    | Ethylene-responsive family protein        | -3.43 |
| Mtr.25491.1.S1_at    | Hypothetical protein                      | -3.43 |
| Mtr.43439.1.S1_at    | Hypothetical protein                      | -3.43 |
| Mtr.12714.1.S1_at    | Hypothetical protein                      | -3.43 |
| Mtr.15596.1.S1_s_at  | Hypothetical protein                      | -3.42 |
| Mtr.769.1.S1_at      | Harpin-induced protein 1 family (HIN1)    | -3.42 |
| Mtr.38670.1.S1_at    | Homoserine kinase                         | -3.42 |
| Mtr.34929.1.S1_at    | Zinc finger protein                       | -3.42 |
| Mtr.11058.1.S1_at    | Snakin-1                                  | -3.42 |
| Mtr.2019.1.S1_at     | Hypothetical protein                      | -3.41 |
| Mtr.50467.1.S1_at    | Serine/threonine protein kinase           | -3.41 |
| Msa.411.1.S1_at      | Hypothetical protein                      | -3.41 |
| Mtr.44047.1.S1_at    | Hypothetical protein                      | -3.41 |
| Mtr.9977.1.S1_at     | Hypothetical protein                      | -3.41 |
| Mtr.20484.1.S1_at    | Cobalamin synthesis protein               | -3.41 |
| Mtr.44602.1.S1_at    | PINHEAD protein                           | -3.41 |
| Mtr.33344.1.S1_at    | Disease resistance protein                | -3.41 |
| Mtr.15800.1.S1_s_at  | Zn-binding protein                        | -3.40 |
| Mtr.32741.1.S1_at    | Nodulin-like protein                      | -3.40 |
| Mtr.15660.1.S1_at    | Peptidase M                               | -3.40 |
| Mtr.32230.1.S1_at    | Glycine-sarcosine methyltransferase       | -3.40 |

|                     |                                         |       |
|---------------------|-----------------------------------------|-------|
| Mtr.33453.1.S1_at   | ATFP3                                   | -3.40 |
| Mtr.18482.1.S1_at   | Hypothetical protein                    | -3.40 |
| Mtr.12607.1.S1_at   | Heat shock protein                      | -3.39 |
| Mtr.27421.1.S1_s_at | NADPH HC toxin reductase                | -3.39 |
| Mtr.47145.1.S1_at   | C2H2-type zinc finger protein           | -3.39 |
| Mtr.12270.1.S1_at   | Alternative oxidase                     | -3.39 |
| Mtr.42606.1.S1_at   | Hypothetical protein                    | -3.39 |
| Mtr.12080.1.S1_at   | Hypothetical protein                    | -3.39 |
| Mtr.38420.1.S1_at   | Hypothetical protein                    | -3.39 |
| Mtr.21401.1.S1_at   | Hypothetical protein                    | -3.39 |
| Mtr.11805.1.S1_s_at | Hypothetical protein                    | -3.39 |
| Mtr.7251.1.S1_s_at  | Beta-defensin prepropeptide             | -3.39 |
| Mtr.6658.1.S1_at    | Auxin-induced protein                   | -3.39 |
| Mtr.37387.1.S1_s_at | Inhibitor of apoptosis-like protein     | -3.38 |
| Mtr.26048.1.S1_at   | Hypothetical protein                    | -3.38 |
| Mtr.41201.1.S1_at   | 50S ribosomal protein L28               | -3.38 |
| Mtr.40447.1.S1_at   | 50S ribosomal protein L34               | -3.38 |
| Mtr.13068.1.S1_at   | Amino acid transporter                  | -3.38 |
| Msa.1262.1.S1_at    | Hypothetical protein                    | -3.38 |
| Mtr.11554.1.S1_at   | Alpha-amylase                           | -3.38 |
| Mtr.40192.1.S1_at   | Transcription factor EREBP-like protein | -3.38 |
| Mtr.32151.1.S1_at   | Hypothetical protein                    | -3.38 |
| Mtr.8916.1.S1_at    | Hypothetical protein                    | -3.38 |
| Msa.1840.1.S1_at    | Hypothetical protein                    | -3.38 |
| Mtr.35850.1.S1_at   | Transcription factor WRKY44             | -3.38 |
| Msa.2547.1.S1_at    | Hypothetical protein                    | -3.38 |
| Mtr.40093.1.S1_at   | Ribosomal protein L12.C                 | -3.38 |
| Msa.1814.1.S1_at    | Hypothetical protein                    | -3.37 |
| Mtr.50620.1.S1_at   | RimM protein                            | -3.37 |
| Mtr.11974.1.S1_at   | Hypothetical protein                    | -3.37 |
| Mtr.49444.1.S1_at   | Protease-associated PA                  | -3.37 |
| Mtr.19693.1.S1_at   | Zinc-containing alcohol dehydrogenase   | -3.37 |
| Mtr.2292.1.S1_s_at  | Hypothetical protein                    | -3.37 |
| Mtr.12113.1.S1_at   | Adenylate isopentenyltransferase        | -3.37 |
| Mtr.14341.1.S1_at   | Calponin-like actin-binding protein     | -3.37 |
| Mtr.34112.1.S1_at   | Ferredoxin-thioredoxin reductase        | -3.37 |
| Mtr.9816.1.S1_at    | Hypothetical protein                    | -3.37 |
| Mtr.11399.1.S1_at   | Proline-rich protein                    | -3.36 |
| Mtr.39076.1.S1_at   | Hypothetical protein                    | -3.36 |
| Mtr.13691.1.S1_at   | ABC transporter                         | -3.36 |
| Mtr.35041.1.S1_s_at | Glutamate receptor 3.3                  | -3.36 |
| Msa.1716.1.S1_at    | Hypothetical protein                    | -3.36 |
| Mtr.24561.1.S1_s_at | UDP-glycosyltransferase                 | -3.36 |
| Mtr.29161.1.S1_at   | Serine/threonine protein kinase         | -3.36 |
| Mtr.44469.1.S1_at   | Prolyl carboxypeptidase like protein    | -3.36 |
| Msa.2828.1.S1_at    | Hypothetical protein                    | -3.36 |
| Mtr.37210.1.S1_at   | Chlorophyll a-b binding protein 215     | -3.36 |
| Mtr.45403.1.S1_s_at | Cellulose synthase                      | -3.36 |
| Mtr.43904.1.S1_at   | Cyclase-like protein                    | -3.36 |
| Mtr.1040.1.S1_at    | Hypothetical protein                    | -3.36 |
| Mtr.10790.1.S1_at   | Lysosomal Pro-X carboxypeptidase        | -3.36 |
| Msa.2287.1.S1_at    | Hypothetical protein                    | -3.36 |
| Msa.1866.1.S1_at    | Hypothetical protein                    | -3.36 |
| Mtr.40090.1.S1_at   | Malate dehydrogenase                    | -3.35 |

|                     |                                                                         |       |
|---------------------|-------------------------------------------------------------------------|-------|
| Mtr.43486.1.S1_at   | 70 kDa peptidylprolyl isomerase                                         | -3.35 |
| Mtr.37326.1.S1_at   | Pectinesterase                                                          | -3.35 |
| Msa.2778.1.S1_at    | Hypothetical protein                                                    | -3.35 |
| Mtr.43893.1.S1_at   | Immunophilin                                                            | -3.35 |
| Mtr.28734.1.S1_at   | Hypothetical protein                                                    | -3.35 |
| Mtr.38649.1.S1_at   | Seed maturation-like protein                                            | -3.35 |
| Mtr.34698.1.S1_at   | Phosphatidylinositol 4-phosphate 5-kinase                               | -3.35 |
| Mtr.13626.1.S1_s_at | ZF-HD homeobox protein                                                  | -3.35 |
| Msa.2966.1.S1_s_at  | Hypothetical protein                                                    | -3.34 |
| Mtr.18038.1.S1_at   | Hypothetical protein                                                    | -3.34 |
| Mtr.34832.1.S1_at   | Hypothetical protein                                                    | -3.34 |
| Mtr.41837.1.S1_s_at | Hypothetical protein                                                    | -3.34 |
| Mtr.12001.1.S1_at   | Phosphoribosylformimino-5-aminoimidazole carboxamide ribotide isomerase | -3.34 |
| Mtr.27947.1.S1_at   | Hypothetical protein                                                    | -3.34 |
| Mtr.35486.1.S1_at   | Hypothetical protein                                                    | -3.34 |
| Mtr.12384.1.S1_at   | Endo-beta-1,4-D-glucanase                                               | -3.34 |
| Mtr.27585.1.S1_at   | GTP-binding protein                                                     | -3.34 |
| Mtr.29292.1.S1_at   | Hypothetical protein                                                    | -3.34 |
| Mtr.42539.1.S1_at   | Hypothetical protein                                                    | -3.34 |
| Mtr.28009.1.S1_at   | Hypothetical protein                                                    | -3.34 |
| Mtr.43742.1.S1_at   | bZIP protein BZO2H2                                                     | -3.34 |
| Mtr.38897.1.S1_at   | Pectinesterase PPE8B                                                    | -3.34 |
| Mtr.41569.1.S1_at   | Hypothetical protein                                                    | -3.34 |
| Mtr.42228.1.S1_at   | RNA-binding protein cp33                                                | -3.34 |
| Mtr.41016.1.S1_at   | Hypothetical protein                                                    | -3.33 |
| Mtr.21146.1.S1_at   | Zn-finger, RING                                                         | -3.33 |
| Mtr.51665.1.S1_s_at | Photosynthetic reaction centre protein                                  | -3.33 |
| Mtr.50907.1.S1_at   | Glycoside hydrolase                                                     | -3.33 |
| Msa.1045.1.S1_at    | Hypothetical protein                                                    | -3.33 |
| Mtr.2062.1.S1_at    | Hypothetical protein                                                    | -3.33 |
| Mtr.11306.1.S1_at   | ATP-dependent RNA helicase                                              | -3.33 |
| Mtr.5919.1.S1_at    | Hypothetical protein                                                    | -3.33 |
| Mtr.7170.1.S1_at    | Ribulose biphosphate carboxylase small chain                            | -3.33 |
| Msa.883.1.S1_at     | Hypothetical protein                                                    | -3.33 |
| Mtr.3793.1.S1_at    | Hypothetical protein                                                    | -3.33 |
| Mtr.39110.1.S1_at   | Hypothetical protein                                                    | -3.32 |
| Mtr.14599.1.S1_at   | Hypothetical protein                                                    | -3.32 |
| Mtr.13551.1.S1_at   | mRNA cleavage factor subunit-like protein                               | -3.32 |
| Mtr.28082.1.S1_s_at | Hypothetical protein                                                    | -3.32 |
| Mtr.142.1.S1_at     | LysM domain-containing receptor-like kinase 3                           | -3.32 |
| Mtr.42024.1.S1_at   | Hypothetical protein                                                    | -3.31 |
| Mtr.12588.1.S1_at   | Hypothetical protein                                                    | -3.31 |
| Mtr.22065.1.S1_at   | Hypothetical protein                                                    | -3.31 |
| Mtr.11390.1.S1_at   | Hypothetical protein                                                    | -3.31 |
| Mtr.44412.1.S1_at   | Hypothetical protein                                                    | -3.31 |
| Mtr.36078.1.S1_at   | Abscisic acid-induced-like protein                                      | -3.31 |
| Mtr.23551.1.S1_at   | Late embryogenesis abundant protein D-34                                | -3.31 |
| Mtr.32341.1.S1_s_at | Hypothetical protein                                                    | -3.30 |
| Mtr.12491.1.S1_at   | 3-ketoacyl-acyl carrier protein reductase                               | -3.30 |
| Mtr.13396.1.S1_at   | Hypothetical protein                                                    | -3.30 |
| Mtr.45994.1.S1_at   | Hypothetical protein                                                    | -3.30 |
| Mtr.22790.1.S1_at   | UDP-glucose pyrophosphorylase                                           | -3.30 |
| Mtr.23638.1.S1_at   | Hypothetical protein                                                    | -3.30 |
| Mtr.11881.1.S1_at   | Hypothetical protein                                                    | -3.30 |



|                     |                                                     |       |
|---------------------|-----------------------------------------------------|-------|
| Mtr.25700.1.S1_at   | Hypothetical protein                                | -3.30 |
| Mtr.32826.1.S1_at   | Hypothetical protein                                | -3.30 |
| Mtr.41949.1.S1_at   | Hypothetical protein                                | -3.30 |
| Mtr.42914.1.S1_at   | Ribulose 1,5-bisphosphate carboxylase small subunit | -3.30 |
| Mtr.16874.1.S1_at   | Hypothetical protein                                | -3.29 |
| Mtr.4733.1.S1_s_at  | Peroxidase                                          | -3.29 |
| Mtr.10104.1.S1_at   | Ornithine decarboxylase                             | -3.29 |
| Mtr.19083.1.S1_at   | ABC transporter                                     | -3.29 |
| Mtr.27521.1.S1_s_at | Hypothetical protein                                | -3.29 |
| Mtr.27607.1.S1_at   | Hypothetical protein                                | -3.29 |
| Mtr.43790.1.S1_at   | Ankyrin like protein                                | -3.29 |
| Mtr.15800.1.S1_at   | Zn-binding protein                                  | -3.29 |
| Mtr.10305.1.S1_at   | Glyoxalase I                                        | -3.29 |
| Mtr.41104.1.S1_at   | Hypothetical protein                                | -3.28 |
| Mtr.11249.1.S1_s_at | Calcineurin B-like protein 10                       | -3.28 |
| Mtr.11116.1.S1_at   | Hypothetical protein                                | -3.28 |
| Mtr.9451.1.S1_at    | Hypothetical protein                                | -3.28 |
| Mtr.40819.1.S1_at   | Hypothetical protein                                | -3.28 |
| Mtr.13163.1.S1_at   | Hypothetical protein                                | -3.28 |
| Mtr.34829.1.S1_at   | Hypothetical protein                                | -3.28 |
| Mtr.2592.1.S1_at    | Disease resistance protein                          | -3.28 |
| Mtr.2599.1.S1_at    | Hypothetical protein                                | -3.28 |
| Mtr.27398.1.S1_at   | Hypothetical protein                                | -3.28 |
| Mtr.44038.1.S1_at   | Hypothetical protein                                | -3.28 |
| Mtr.43384.1.S1_at   | Hypothetical protein                                | -3.28 |
| Mtr.10876.1.S1_at   | Hypothetical protein                                | -3.28 |
| Mtr.27941.1.S1_at   | Hypothetical protein                                | -3.28 |
| Mtr.51633.1.S1_at   | Hypothetical protein                                | -3.27 |
| Mtr.5084.1.S1_at    | Hypothetical protein                                | -3.27 |
| Mtr.44381.1.S1_at   | Beta-galactosidase                                  | -3.27 |
| Msa.2619.1.S1_at    | Hypothetical protein                                | -3.27 |
| Mtr.51862.1.S1_at   | Hypothetical protein                                | -3.27 |
| Mtr.9594.1.S1_at    | Hypothetical protein                                | -3.27 |
| Mtr.26509.1.S1_s_at | ARP2/3 complex 20 kDa subunit                       | -3.27 |
| Mtr.48199.1.S1_at   | Hypothetical protein                                | -3.27 |
| Mtr.38545.1.S1_s_at | Kinesin 1                                           | -3.27 |
| Mtr.7067.1.S1_at    | Beta-galactosidase                                  | -3.27 |
| Mtr.11244.1.S1_at   | RGA2 protein                                        | -3.27 |
| Mtr.13689.1.S1_at   | Dehydration-responsive protein                      | -3.26 |
| Mtr.45459.1.S1_at   | Hypothetical protein                                | -3.26 |
| Mtr.14184.1.S1_s_at | Annexin                                             | -3.26 |
| Mtr.19629.1.S1_at   | Hypothetical protein                                | -3.26 |
| Mtr.6638.1.S1_at    | Hypothetical protein                                | -3.26 |
| Mtr.26297.1.S1_at   | Hypothetical protein                                | -3.26 |
| Mtr.41205.1.S1_at   | Myosin-like protein                                 | -3.26 |
| Mtr.12012.1.S1_at   | Phosphate starvation response regulator 1           | -3.26 |
| Mtr.5545.1.S1_at    | Hypothetical protein                                | -3.26 |
| Mtr.37882.1.S1_at   | Nucleotide pyrophosphatase/phosphodiesterase        | -3.26 |
| Mtr.24749.1.S1_at   | Hypothetical protein                                | -3.25 |
| Mtr.33769.1.S1_s_at | Prolyl carboxypeptidase                             | -3.25 |
| Mtr.17483.1.S1_s_at | Adenosine kinase                                    | -3.25 |
| Mtr.45240.1.S1_at   | Hypothetical protein                                | -3.25 |
| Mtr.12701.1.S1_at   | Om(1E) protein                                      | -3.25 |
| Mtr.36865.1.S1_s_at | Hypothetical protein                                | -3.25 |

|                      |                                                                       |       |
|----------------------|-----------------------------------------------------------------------|-------|
| Mtr.11482.1.S1_at    | Na <sup>+</sup> /H <sup>+</sup> antiporter                            | -3.25 |
| Msa.1148.1.S1_at     | Hypothetical protein                                                  | -3.25 |
| Mtr.17107.1.S1_at    | Inositol monophosphatase                                              | -3.25 |
| Mtr.1770.1.S1_at     | Protein kinase                                                        | -3.24 |
| Mtr.10025.1.S1_at    | Phosphoribosylanthranilate transferase                                | -3.24 |
| Mtr.13326.1.S1_at    | Hypothetical protein                                                  | -3.24 |
| Mtr.38132.1.S1_a_at  | Homeobox 2 protein                                                    | -3.24 |
| Mtr.11994.1.S1_at    | ABC transporter                                                       | -3.24 |
| Mtr.37742.1.S1_s_at  | Methionine sulfoxide reductase A                                      | -3.24 |
| Mtr.11318.1.S1_at    | Hypothetical protein                                                  | -3.24 |
| Mtr.25921.1.S1_at    | PPR repeat-containing protein                                         | -3.24 |
| Msa.1230.1.S1_at     | Hypothetical protein                                                  | -3.24 |
| Mtr.8254.1.S1_at     | Hypothetical protein                                                  | -3.24 |
| Mtr.39543.1.S1_at    | DNAJ heat shock N-terminal domain-containing protein                  | -3.24 |
| Mtr.48366.1.S1_at    | Hypothetical protein                                                  | -3.24 |
| Mtr.32786.1.S1_at    | Hypothetical protein                                                  | -3.23 |
| Mtr.11197.1.S1_at    | Hypothetical protein                                                  | -3.23 |
| Mtr.29352.1.S1_at    | Hypothetical protein                                                  | -3.23 |
| Mtr.11205.1.S1_at    | Hypothetical protein                                                  | -3.23 |
| Mtr.8959.1.S1_at     | Beta-expansin 3                                                       | -3.23 |
| Mtr.152.1.S1_at      | Hypothetical protein                                                  | -3.23 |
| Msa.2683.1.S1_at     | Hypothetical protein                                                  | -3.23 |
| AFFX-Msa-gsta-M_x_at | Hypothetical protein                                                  | -3.23 |
| Mtr.33655.1.S1_at    | Hypothetical protein                                                  | -3.23 |
| Mtr.4250.1.S1_at     | Hypothetical protein                                                  | -3.23 |
| Mtr.9069.1.S1_at     | Myb family transcription factor                                       | -3.23 |
| Mtr.13091.1.S1_at    | Loricrin-like protein                                                 | -3.22 |
| Mtr.32341.1.S1_at    | Hypothetical protein                                                  | -3.22 |
| Mtr.45958.1.S1_s_at  | Hypothetical protein                                                  | -3.22 |
| Mtr.48305.1.S1_x_at  | Hypothetical protein                                                  | -3.22 |
| Mtr.26115.1.S1_at    | Protein kinase                                                        | -3.22 |
| Mtr.3083.1.S1_at     | ABC transporter                                                       | -3.22 |
| Mtr.9501.1.S1_at     | Lysine decarboxylase                                                  | -3.22 |
| Msa.2419.1.S1_at     | Hypothetical protein                                                  | -3.22 |
| Mtr.15386.1.S1_at    | Hypothetical protein                                                  | -3.22 |
| Mtr.44813.1.S1_at    | Aromatic rich glycoprotein                                            | -3.22 |
| Mtr.4613.1.S1_at     | 4-methyl-5(B-hydroxyethyl)-thiazole monophosphate biosynthesis enzyme | -3.22 |
| Mtr.41140.1.S1_at    | Hypothetical protein                                                  | -3.22 |
| Mtr.29108.1.S1_at    | Hypothetical protein                                                  | -3.22 |
| Mtr.11830.1.S1_at    | ATP-dependent RNA helicase DBP9 (DEAD-box protein 9)                  | -3.21 |
| Mtr.15494.1.S1_at    | Cinnamyl alcohol dehydrogenase                                        | -3.21 |
| Mtr.38700.1.S1_at    | Hypothetical protein                                                  | -3.21 |
| Mtr.11631.1.S1_at    | Chloroplast alpha-glucan water dikinase isoform 3                     | -3.21 |
| Msa.1957.1.S1_s_at   | Hypothetical protein                                                  | -3.21 |
| Mtr.28655.1.S1_at    | Hypothetical protein                                                  | -3.21 |
| Mtr.41301.1.S1_at    | Hypothetical protein                                                  | -3.21 |
| Mtr.30682.1.S1_at    | Hypothetical protein                                                  | -3.21 |
| Mtr.500.1.S1_at      | Hypothetical protein                                                  | -3.21 |
| Mtr.3033.1.S1_at     | Hydroquinone glucosyltransferase                                      | -3.21 |
| Mtr.41620.1.S1_at    | Hypothetical protein                                                  | -3.21 |
| Mtr.12509.1.S1_at    | Hypothetical protein                                                  | -3.21 |
| Mtr.14048.1.S1_s_at  | Hypothetical protein                                                  | -3.20 |
| Msa.897.1.S1_s_at    | Hypothetical protein                                                  | -3.20 |
| Mtr.45338.1.S1_at    | Cytochrome P450                                                       | -3.20 |

|                     |                                               |       |
|---------------------|-----------------------------------------------|-------|
| Mtr.12798.1.S1_at   | Benzoyl coenzyme A                            | -3.20 |
| Mtr.19808.1.S1_at   | Hypothetical protein                          | -3.20 |
| Mtr.15549.1.S1_at   | Hypothetical protein                          | -3.20 |
| Mtr.46514.1.S1_s_at | Alpha/beta-amyrin synthase                    | -3.20 |
| Mtr.24048.1.S1_at   | Hypothetical protein                          | -3.20 |
| Mtr.41480.1.S1_at   | Polygalacturonase isoenzyme 1 beta subunit    | -3.20 |
| Mtr.11216.1.S1_at   | Preprotein translocase secY subunit           | -3.20 |
| Mtr.12851.1.S1_at   | Acyl CoA reductase                            | -3.20 |
| Mtr.39201.1.S1_s_at | Hypothetical protein                          | -3.20 |
| Mtr.6192.1.S1_at    | Hypothetical protein                          | -3.20 |
| Mtr.33457.1.S1_s_at | Galactinol synthase                           | -3.20 |
| Mtr.27907.1.S1_at   | Pectate lyase-like protein                    | -3.20 |
| Msa.1595.1.S1_at    | Hypothetical protein                          | -3.19 |
| Mtr.29239.1.S1_at   | Phosphatidylinositol-specific phospholipase C | -3.19 |
| Mtr.36992.1.S1_at   | Seed maturation-like protein                  | -3.19 |
| Mtr.20364.1.S1_at   | Annexin                                       | -3.19 |
| Mtr.9229.1.S1_at    | Hypothetical protein                          | -3.19 |
| Mtr.40199.1.S1_at   | ARG10                                         | -3.19 |
| Msa.2803.1.S1_at    | Hypothetical protein                          | -3.18 |
| Mtr.33415.1.S1_at   | Polygalacturonase inhibitor protein           | -3.18 |
| Mtr.51652.1.S1_at   | Cytochrome P450                               | -3.18 |
| Mtr.42368.1.S1_at   | Hypothetical protein                          | -3.18 |
| Mtr.32562.1.S1_at   | Hypothetical protein                          | -3.18 |
| Mtr.42200.1.S1_s_at | Protein kinase APK1B                          | -3.18 |
| Mtr.37392.1.S1_at   | Elongation factor Tu                          | -3.18 |
| Mtr.36341.1.S1_s_at | Tetracycline transporter                      | -3.18 |
| Mtr.28728.1.S1_at   | Hypothetical protein                          | -3.18 |
| Mtr.20633.1.S1_at   | General substrate transporter                 | -3.18 |
| Mtr.12473.1.S1_at   | Isoflavonoid glucosyltransferase              | -3.17 |
| Mtr.10608.1.S1_at   | Glutamine cyclotransferase                    | -3.17 |
| Mtr.2580.1.S1_at    | Leptin receptor                               | -3.17 |
| Mtr.9332.1.S1_at    | Hypothetical protein                          | -3.17 |
| Mtr.41473.1.S1_at   | Hypothetical protein                          | -3.17 |
| Mtr.37602.1.S1_at   | Proline-rich protein                          | -3.17 |
| Msa.1246.1.S1_at    | Hypothetical protein                          | -3.17 |
| Mtr.44436.1.S1_at   | Glutaredoxin-like protein                     | -3.17 |
| Mtr.34636.1.S1_at   | Hypothetical protein                          | -3.17 |
| Mtr.31198.1.S1_at   | Hypothetical protein                          | -3.16 |
| Mtr.39941.1.S1_at   | Hypothetical protein                          | -3.16 |
| Mtr.22618.1.S1_at   | Mismatch repair protein MutS                  | -3.16 |
| Mtr.13868.1.S1_at   | Hypothetical protein                          | -3.16 |
| Mtr.5788.1.S1_s_at  | Hypothetical protein                          | -3.16 |
| Mtr.5333.1.S1_at    | Hypothetical protein                          | -3.16 |
| Mtr.12074.1.S1_s_at | Coronin binding protein                       | -3.16 |
| Mtr.38661.1.S1_at   | Hypothetical protein                          | -3.15 |
| Msa.2549.1.S1_at    | Hypothetical protein                          | -3.15 |
| Mtr.35064.1.S1_at   | Cucumisin-like serine protease                | -3.15 |
| Mtr.40618.1.S1_at   | Thylakoid lumenal 35.8 kDa protein            | -3.15 |
| Mtr.19981.1.S1_at   | Hypothetical protein                          | -3.15 |
| Mtr.44708.1.S1_at   | Hypothetical protein                          | -3.15 |
| Mtr.10321.1.S1_at   | Glycerophosphoryl diester phosphodiesterase 2 | -3.15 |
| Msa.1684.1.S1_at    | Hypothetical protein                          | -3.15 |
| Mtr.25480.1.S1_at   | Mitochondrial carrier protein                 | -3.15 |
| Mtr.8604.1.S1_at    | Isoflavone reductase                          | -3.15 |

|                     |                                                    |       |
|---------------------|----------------------------------------------------|-------|
| Mtr.40580.1.S1_at   | 30S ribosomal protein S17                          | -3.14 |
| Mtr.13752.1.S1_at   | Calcineurin B-like protein 10                      | -3.14 |
| Mtr.32476.1.S1_at   | Starch phosphorylase                               | -3.14 |
| Mtr.28077.1.S1_at   | Hypothetical protein                               | -3.14 |
| Mtr.40407.1.S1_at   | Hypothetical protein                               | -3.14 |
| Mtr.40255.1.S1_at   | Hydroquinone glucosyltransferase                   | -3.14 |
| Mtr.44681.1.S1_at   | Hypothetical protein                               | -3.14 |
| Mtr.32541.1.S1_at   | Xyloglucan endotransglucosylase/hydrolase          | -3.14 |
| Mtr.9050.1.S1_at    | Hypothetical protein                               | -3.14 |
| Mtr.32078.1.S1_at   | Hypothetical protein                               | -3.14 |
| Mtr.41534.1.S1_at   | Hypothetical protein                               | -3.14 |
| Mtr.17706.1.S1_at   | Hypothetical protein                               | -3.14 |
| Mtr.13141.1.S1_at   | Chloroplast nucleoid DNA binding protein           | -3.14 |
| Mtr.41817.1.S1_at   | Sulfate transporter ATST1                          | -3.14 |
| Mtr.36188.1.S1_at   | Hypothetical protein                               | -3.14 |
| Mtr.41000.1.S1_at   | Hypothetical protein                               | -3.14 |
| Mtr.38498.1.S1_at   | Mitochondrial transcription termination factor     | -3.14 |
| Mtr.34390.1.S1_at   | Hypothetical protein                               | -3.13 |
| Mtr.43838.1.S1_at   | ATP-dependent Clp protease                         | -3.13 |
| Mtr.11113.1.S1_at   | Hypothetical protein                               | -3.13 |
| Mtr.48466.1.S1_at   | Uroporphyrinogen decarboxylase                     | -3.13 |
| Mtr.42951.1.S1_at   | Hypothetical protein                               | -3.13 |
| Mtr.44312.1.S1_at   | Hypothetical protein                               | -3.13 |
| Mtr.12769.1.S1_at   | Hypothetical protein                               | -3.13 |
| Mtr.40397.1.S1_at   | Cytochrome P450 78A3                               | -3.13 |
| Mtr.50217.1.S1_s_at | AFG1-like ATPase                                   | -3.13 |
| Mtr.7379.1.S1_at    | Hypothetical protein                               | -3.13 |
| Mtr.32751.1.S1_at   | Leucine-rich repeat receptor-like protein kinase 1 | -3.13 |
| Msa.2326.1.S1_at    | Hypothetical protein                               | -3.13 |
| Mtr.46616.1.S1_at   | Hypothetical protein                               | -3.13 |
| Mtr.41264.1.S1_at   | Zinc finger protein 4                              | -3.13 |
| Mtr.41768.1.S1_at   | Verticillium wilt disease resistance protein       | -3.12 |
| Mtr.38127.1.S1_at   | Hypothetical protein                               | -3.12 |
| Mtr.43324.1.S1_s_at | Polygalacturonase-like protein                     | -3.12 |
| Mtr.927.1.S1_at     | Purple acid phosphatase                            | -3.12 |
| Mtr.2090.1.S1_at    | Cation transport ATPase                            | -3.12 |
| Mtr.48713.1.S1_at   | Ribosomal protein L10E                             | -3.12 |
| Mtr.13889.1.S1_at   | Hypothetical protein                               | -3.12 |
| Mtr.33661.1.S1_at   | Subtilisin-like serine proteinase                  | -3.12 |
| Mtr.6340.1.S1_at    | Cyclic nucleotide-gated ion channel 2              | -3.12 |
| Mtr.10771.1.S1_at   | One helix protein                                  | -3.12 |
| Mtr.2197.1.S1_at    | Hypothetical protein                               | -3.12 |
| Mtr.12864.1.S1_at   | Cytochrome P450                                    | -3.12 |
| Mtr.39924.1.S1_at   | Ethylene-responsive family protein                 | -3.11 |
| Mtr.3319.1.S1_s_at  | Hypothetical protein                               | -3.11 |
| Mtr.13460.1.S1_at   | Chloroplast ribosomal protein L10                  | -3.11 |
| Mtr.618.1.S1_s_at   | Hypothetical protein                               | -3.11 |
| Mtr.4373.1.S1_at    | Hypothetical protein                               | -3.11 |
| Mtr.41145.1.S1_at   | Peroxisomal copper-containing amine oxidase        | -3.10 |
| Mtr.22822.1.S1_at   | Hypothetical protein                               | -3.10 |
| Mtr.37245.1.S1_s_at | Chlorophyll a-b binding protein 215                | -3.10 |
| Mtr.37989.1.S1_at   | Hypothetical protein                               | -3.10 |
| Mtr.17598.1.S1_at   | Hypothetical protein                               | -3.10 |
| Mtr.8824.1.S1_at    | CONSTANS-like protein 2                            | -3.10 |

|                     |                                                    |       |
|---------------------|----------------------------------------------------|-------|
| Mtr.34503.1.S1_at   | Hypothetical protein                               | -3.10 |
| Mtr.18775.1.S1_s_at | Hypothetical protein                               | -3.10 |
| Mtr.17361.1.S1_at   | Beta-Ig-H3/fasciclin                               | -3.10 |
| Mtr.14047.1.S1_s_at | Hypothetical protein                               | -3.09 |
| Mtr.12366.1.S1_s_at | Transcription factor Myb1                          | -3.09 |
| Mtr.11702.1.S1_at   | ABC transporter                                    | -3.09 |
| Mtr.42197.1.S1_at   | Hypothetical protein                               | -3.09 |
| Mtr.37704.1.S1_at   | CDC48-interacting UBX-domain protein               | -3.09 |
| Mtr.24519.1.S1_at   | Globulin-like protein                              | -3.09 |
| Mtr.12637.1.S1_at   | Red chlorophyll catabolite reductase               | -3.09 |
| Mtr.1559.1.S1_s_at  | Calcineurin B-like protein 10                      | -3.09 |
| Mtr.7204.1.S1_at    | Microtubule-associated protein EB1-like protein    | -3.09 |
| Mtr.43182.1.S1_at   | Hypothetical protein                               | -3.09 |
| Mtr.39248.1.S1_at   | Hypothetical protein                               | -3.09 |
| Mtr.39913.1.S1_at   | Hypothetical protein                               | -3.09 |
| Mtr.33925.1.S1_at   | Hypothetical protein                               | -3.08 |
| Msa.1400.1.S1_at    | Hypothetical protein                               | -3.08 |
| Mtr.13554.1.S1_at   | Hypothetical protein                               | -3.08 |
| Mtr.9877.1.S1_at    | Short-chain dehydrogenase/reductase                | -3.08 |
| Mtr.11441.1.S1_at   | Aspartyl protease                                  | -3.08 |
| Mtr.42358.1.S1_at   | Cysteine synthase                                  | -3.08 |
| Mtr.50947.1.S1_s_at | Myb, DNA-binding                                   | -3.08 |
| Mtr.41696.1.S1_at   | Hypothetical protein                               | -3.08 |
| Mtr.21515.1.S1_at   | Cellulose synthase                                 | -3.08 |
| Msa.1941.1.S1_at    | Hypothetical protein                               | -3.08 |
| Mtr.14988.1.S1_at   | Pectin lyase-like protein                          | -3.07 |
| Mtr.9322.1.S1_at    | Fatty acid elongase-like protein (Cer2-like)       | -3.07 |
| Mtr.18398.1.S1_at   | Nodulin-like protein                               | -3.07 |
| Mtr.39062.1.S1_at   | Mitogen-activated protein kinase KSS1              | -3.07 |
| Mtr.34540.1.S1_s_at | Hypothetical protein                               | -3.07 |
| Mtr.15922.1.S1_at   | Chloroplast channel forming outer membrane protein | -3.07 |
| Mtr.4623.1.S1_at    | WRKY transcription factor 32                       | -3.07 |
| Mtr.9912.1.S1_at    | Hypothetical protein                               | -3.07 |
| Mtr.31487.1.S1_at   | Agmatine Iminohydrolase                            | -3.07 |
| Msa.1570.1.S1_at    | Hypothetical protein                               | -3.07 |
| Mtr.13908.1.S1_at   | HSR203J protein-like protein                       | -3.07 |
| Mtr.18494.1.S1_at   | ZF-HD homeobox protein                             | -3.06 |
| Mtr.29383.1.S1_at   | Hypothetical protein                               | -3.06 |
| Msa.1219.1.S1_at    | Hypothetical protein                               | -3.06 |
| Mtr.32290.1.S1_at   | Hypothetical protein                               | -3.06 |
| Mtr.15412.1.S1_at   | Hypothetical protein                               | -3.06 |
| Mtr.8858.1.S1_at    | Biogenesis protein                                 | -3.06 |
| Mtr.5543.1.S1_at    | Multidrug resistance-associated protein            | -3.06 |
| Mtr.13011.1.S1_at   | Receptor protein kinase PERK1                      | -3.06 |
| Mtr.32315.1.S1_at   | Hypothetical protein                               | -3.06 |
| Msa.1697.1.S1_at    | Hypothetical protein                               | -3.06 |
| Mtr.7219.1.S1_at    | Dehydration-responsive protein RD22                | -3.06 |
| Mtr.29302.1.S1_at   | Hypothetical protein                               | -3.06 |
| Mtr.5819.1.S1_at    | Hypothetical protein                               | -3.05 |
| Mtr.38018.1.S1_at   | Ids4-like protein                                  | -3.05 |
| Mtr.1230.1.S1_s_at  | Hypothetical protein                               | -3.05 |
| Mtr.5795.1.S1_at    | Hypothetical protein                               | -3.05 |
| Mtr.1068.1.S1_at    | P-glycoprotein                                     | -3.05 |
| Mtr.2138.1.S1_at    | Hypothetical protein                               | -3.05 |

|                     |                                                   |       |
|---------------------|---------------------------------------------------|-------|
| Mtr.33445.1.S1_at   | Plakoglobin/armadillo/beta-catenin-like protein   | -3.05 |
| Mtr.11785.1.S1_at   | Hypothetical protein                              | -3.05 |
| Mtr.51674.1.S1_at   | Mitochondrial carrier protein                     | -3.04 |
| Mtr.50961.1.S1_s_at | Anthranilate phosphoribosyl transferase           | -3.04 |
| Mtr.50778.1.S1_at   | Hypothetical protein                              | -3.04 |
| Mtr.34709.1.S1_at   | Ser-thr protein kinase                            | -3.04 |
| Msa.2664.1.S1_at    | Hypothetical protein                              | -3.04 |
| Mtr.38668.1.S1_at   | Hypothetical protein                              | -3.04 |
| Mtr.20400.1.S1_at   | Hypothetical protein                              | -3.04 |
| Mtr.43815.1.S1_at   | Hypothetical protein                              | -3.04 |
| Mtr.9776.1.S1_at    | Hypothetical protein                              | -3.04 |
| Mtr.40612.1.S1_at   | Myo-inositol monophosphatase 2                    | -3.04 |
| Mtr.35867.1.S1_at   | Hypothetical protein                              | -3.04 |
| Mtr.23330.1.S1_at   | Hypothetical protein                              | -3.03 |
| Mtr.33737.1.S1_at   | Hypothetical protein                              | -3.03 |
| Mtr.23638.1.S1_s_at | Hypothetical protein                              | -3.03 |
| Mtr.37859.1.S1_at   | Patatin-like protein                              | -3.03 |
| Mtr.12148.1.S1_s_at | Hypothetical protein                              | -3.03 |
| Mtr.42622.1.S1_at   | Maturase                                          | -3.03 |
| Mtr.48816.1.S1_at   | Phosphoglycerate mutase                           | -3.03 |
| Mtr.32155.1.S1_at   | Hypothetical protein                              | -3.03 |
| Mtr.43393.1.S1_at   | Nicotianamine synthase                            | -3.03 |
| Mtr.14808.1.S1_at   | Nascent polypeptide-associated complex NAC        | -3.02 |
| Mtr.9216.1.S1_at    | Aspartyl aminopeptidase                           | -3.02 |
| Mtr.6308.1.S1_at    | DnaK-type molecular chaperone hsc70               | -3.02 |
| Mtr.43133.1.S1_at   | Triosephosphate isomerase                         | -3.02 |
| Mtr.44307.1.S1_s_at | Hypothetical protein                              | -3.02 |
| Mtr.8532.1.S1_s_at  | Alpha-expansin 3                                  | -3.02 |
| Mtr.36189.1.S1_at   | Hypothetical protein                              | -3.02 |
| Mtr.29554.1.S1_s_at | Hypothetical protein                              | -3.02 |
| Msa.2953.1.S1_at    | Hypothetical protein                              | -3.02 |
| Mtr.36426.1.S1_at   | Hypothetical protein                              | -3.02 |
| Msa.1443.1.S1_at    | Hypothetical protein                              | -3.02 |
| Mtr.14518.1.S1_at   | HAD-superfamily hydrolase                         | -3.02 |
| Mtr.8662.1.S1_at    | Calcium/calmodulin-dependent protein kinase CaMK3 | -3.02 |
| Mtr.28518.1.S1_at   | Hypothetical protein                              | -3.02 |
| Mtr.37597.1.S1_s_at | Hypothetical protein                              | -3.02 |
| Mtr.43643.1.S1_at   | Sucrose-phosphatase                               | -3.02 |
| Mtr.23930.1.S1_s_at | Crp1 protein                                      | -3.02 |
| Msa.1387.1.S1_at    | Hypothetical protein                              | -3.01 |
| Msa.1906.1.S1_at    | Hypothetical protein                              | -3.01 |
| Mtr.43274.1.S1_at   | Gamma hydroxybutyrate dehydrogenase               | -3.01 |
| Mtr.42142.1.S1_at   | GTP-binding protein                               | -3.01 |
| Mtr.10483.1.S1_at   | Esterase D                                        | -3.01 |
| Mtr.30224.1.S1_at   | Hypothetical protein                              | -3.01 |
| Mtr.11718.1.S1_at   | Hypothetical protein                              | -3.01 |
| Mtr.50053.1.S1_at   | Hypothetical protein                              | -3.01 |
| Mtr.37626.1.S1_at   | Peroxidase                                        | -3.00 |
| Mtr.9768.1.S1_at    | Hypothetical protein                              | -3.00 |
| Mtr.20785.1.S1_at   | Homoserine dehydrogenase                          | -3.00 |

**Supplementary Table S5. Upregulated phytohormone related genes at 12 hrs after inoculation with soybean rust**

| <b>Probesets</b>    | <b>Target Description</b>                                     | <b>Phytohormone</b> | <b>Fold reduction</b> |
|---------------------|---------------------------------------------------------------|---------------------|-----------------------|
| Mtr.40147.1.S1_s_at | Class 10 PR protein                                           | Salicylic acid      | 199.02                |
| Mtr.10391.1.S1_at   | Class 10 PR protein                                           | Salicylic acid      | 78.99                 |
| Mtr.41478.1.S1_at   | Class 10 PR protein                                           | Salicylic acid      | 60.99                 |
| Mtr.42966.1.S1_at   | Disease resistance response protein Pi49 (PR10)               | Salicylic acid      | 52.33                 |
| Mtr.12615.1.S1_at   | Pathogenesis-related protein PR10A                            | Salicylic acid      | 29.95                 |
| Mtr.22903.1.S1_at   | Chitinase (Class II)                                          | Salicylic acid      | 20.89                 |
| Mtr.33334.1.S1_at   | Exo-1,3-beta-glucanase                                        | Salicylic acid      | 13.20                 |
| Mtr.6341.1.S1_at    | Beta-1, 3-glucanase                                           | Salicylic acid      | 11.64                 |
| Mtr.4464.1.S1_at    | Thaumatococcus-like protein 1                                 | Salicylic acid      | 11.00                 |
| Mtr.8763.1.S1_at    | Thaumatococcus-like protein PR-5a                             | Salicylic acid      | 10.06                 |
| Mtr.7638.1.S1_at    | Endo-1,3-beta-glucanase                                       | Salicylic acid      | 7.87                  |
| Mtr.12277.1.S1_at   | Class 10 PR protein                                           | Salicylic acid      | 7.49                  |
| Mtr.43119.1.S1_at   | Chorismate synthase 1                                         | Salicylic acid      | 7.09                  |
| Mtr.35960.1.S1_at   | 1, 3-beta-glucanase-like protein                              | Salicylic acid      | 5.89                  |
| Mtr.12525.1.S1_at   | Chitinase                                                     | Salicylic acid      | 5.10                  |
| Mtr.8884.1.S1_at    | Pathogenesis-related protein 4A                               | Salicylic acid      | 5.06                  |
| Mtr.35231.1.S1_s_at | Pathogenesis-related protein                                  | Salicylic acid      | 4.44                  |
| Mtr.41245.1.S1_at   | Chorismate mutase                                             | Salicylic acid      | 4.44                  |
| Mtr.45398.1.S1_at   | Exo-1,3-beta-glucanase                                        | Salicylic acid      | 4.23                  |
| Mtr.10325.1.S1_at   | Chitinase                                                     | Salicylic acid      | 3.95                  |
| Mtr.15053.1.S1_at   | Thaumatococcus                                                | Salicylic acid      | 3.94                  |
| Mtr.42147.1.S1_at   | Intracellular pathogenesis related protein                    | Salicylic acid      | 3.67                  |
| Mtr.5770.1.S1_at    | Endo-1,3-beta-glucanase                                       | Salicylic acid      | 3.34                  |
| Mtr.8944.1.S1_at    | Chorismate mutase                                             | Salicylic acid      | 3.31                  |
| Mtr.9221.1.S1_at    | Salicylic acid glucosyltransferase                            | Salicylic acid      | 3.23                  |
| Mtr.33283.1.S1_at   | Chitinase                                                     | Salicylic acid      | 3.16                  |
| Mtr.35231.1.S1_at   | Pathogenesis-related protein                                  | Salicylic acid      | 3.13                  |
| Mtr.42989.1.S1_at   | Thaumatococcus-like protein PR-5b                             | Salicylic acid      | 126.14                |
| Mtr.48288.1.S1_s_at | Senescence-associated protein                                 | Jasmonic acid       | 4.48                  |
| Mtr.318.1.S1_at     | OPR3 (12-oxophytodienoic acid 10,11-reductase)                | Jasmonic acid       | 4.41                  |
| Mtr.37633.1.S1_at   | Allene oxide synthase                                         | Jasmonic acid       | 4.07                  |
| Mtr.320.1.S1_at     | 12-oxophytodienoic acid 10, 11-reductase                      | Jasmonic acid       | 4.01                  |
| Mtr.320.1.S1_x_at   | 12-oxophytodienoic acid 10, 11-reductase                      | Jasmonic acid       | 3.62                  |
| Mtr.41703.1.S1_at   | Lipoxygenase                                                  | Jasmonic acid       | 3.55                  |
| Mtr.32884.1.S1_s_at | Jasmonic acid 2                                               | Jasmonic acid       | 3.17                  |
| Mtr.12917.1.S1_at   | Jasmonic acid 2                                               | Jasmonic acid       | 3.11                  |
| Mtr.8462.1.S1_at    | Lipoxygenase                                                  | Jasmonic acid       | 3.07                  |
| Mtr.44496.1.S1_at   | AP2 domain-containing protein AP29-like                       | Ethylene            | 168.51                |
| Mtr.5385.1.S1_at    | Ethylene response factor-like AP2 domain transcription factor | Ethylene            | 79.56                 |
| Mtr.23418.1.S1_s_at | AP2 domain transcription factor                               | Ethylene            | 78.36                 |
| Mtr.5750.1.S1_at    | Nicotiana EREBP-3-like protein                                | Ethylene            | 47.69                 |
| Mtr.7260.1.S1_at    | Ethylene-induced esterase                                     | Ethylene            | 41.86                 |
| Mtr.32914.1.S1_at   | Ethylene-induced esterase                                     | Ethylene            | 25.61                 |
| Mtr.9223.1.S1_at    | Ethylene response factor-like AP2 domain transcription factor | Ethylene            | 23.58                 |
| Mtr.41694.1.S1_s_at | AP2 domain transcription factor                               | Ethylene            | 21.86                 |
| Mtr.9788.1.S1_at    | ACC synthase                                                  | Ethylene            | 15.31                 |
| Mtr.45912.1.S1_at   | Pathogenesis-related transcriptional factor, ERF              | Ethylene            | 13.53                 |
| Mtr.12456.1.S1_at   | AP2-related transcription factor                              | Ethylene            | 11.61                 |

|                     |                                                         |             |       |
|---------------------|---------------------------------------------------------|-------------|-------|
| Mtr.43497.1.S1_at   | Ethylene-forming-enzyme-like dioxygenase                | Etylene     | 11.00 |
| Mtr.4906.1.S1_s_at  | 1-aminocyclopropane-1-carboxylate oxidase (ACC oxidase) | Etylene     | 6.57  |
| Mtr.10165.1.S1_at   | Ethylene receptor                                       | Etylene     | 6.41  |
| Mtr.6378.1.S1_at    | 1-aminocyclopropanecarboxylic acid oxidase              | Etylene     | 4.71  |
| Mtr.10424.1.S1_at   | Ethylene responsive element binding factor              | Etylene     | 4.20  |
| Mtr.39861.1.S1_at   | Ethylene response factor ERF1                           | Etylene     | 4.11  |
| Mtr.39021.1.S1_at   | AP2 domain transcription factor                         | Etylene     | 4.02  |
| Mtr.7556.1.S1_at    | AP2 domain containing protein                           | Etylene     | 3.98  |
| Mtr.43104.1.S1_at   | 1-aminocyclopropanecarboxylic acid oxidase              | Etylene     | 3.82  |
| Mtr.9002.1.S1_at    | 1-aminocyclopropane-1-carboxylic acid oxidase           | Etylene     | 3.54  |
| Mtr.10425.1.S1_at   | Ethylene responsive element binding factor              | Etylene     | 3.33  |
| Mtr.13557.1.S1_at   | Ethylene receptor homolog                               | Etylene     | 3.32  |
| Mtr.39020.1.S1_at   | Ethylene receptor homolog                               | Etylene     | 3.27  |
| Mtr.42021.1.S1_at   | 1-aminocyclopropane-1-carboxylate oxidase               | Etylene     | 3.08  |
| Mtr.27695.1.S1_at   | Auxin response factor 30                                | Auxin       | 44.90 |
| Mtr.38270.1.S1_at   | ABA-responsive protein                                  | Auxin       | 21.11 |
| Mtr.35852.1.S1_at   | Auxin-induced protein                                   | Auxin       | 10.96 |
| Mtr.35357.1.S1_at   | Auxin-regulated gene                                    | Auxin       | 10.10 |
| Mtr.25476.1.S1_at   | Auxin efflux carrier protein family                     | Auxin       | 9.31  |
| Mtr.696.1.S1_at     | Auxin-induced (indole-3-acetic acid induced) protein    | Auxin       | 8.13  |
| Mtr.49400.1.S1_at   | Auxin responsive SAUR protein                           | Auxin       | 7.58  |
| Mtr.10147.1.S1_at   | Auxin-induced SAUR-like protein                         | Auxin       | 3.50  |
| Mtr.13714.1.S1_at   | Auxin-induced protein                                   | Auxin       | 3.25  |
| Mtr.12959.1.S1_s_at | Auxin response factor                                   | Auxin       | 3.25  |
| Mtr.44219.1.S1_at   | Cytokinin oxidase-like protein                          | Cytokinin   | 8.86  |
| Mtr.38799.1.S1_s_at | Cytokinin oxidase-like protein                          | Cytokinin   | 7.86  |
| Mtr.38799.1.S1_at   | Cytokinin oxidase-like protein                          | Cytokinin   | 6.06  |
| Mtr.48768.1.S1_at   | Gibberellin regulated protein                           | Gibberellin | 38.44 |
| Mtr.15448.1.S1_at   | Gibberellin regulated protein                           | Gibberellin | 5.14  |
| Mtr.1887.1.S1_at    | Gibberellin oxidase-like protein                        | Gibberellin | 3.10  |



**Supplementary Table S6. Downregulated phytohormone related genes at 12 hrs post inoculation with soybean rust**

| <b>Probesets</b>    | <b>Target Description</b>                                         | <b>Pytohormone</b> | <b>Fold reduction</b> |
|---------------------|-------------------------------------------------------------------|--------------------|-----------------------|
| Mtr.39853.1.S1_at   | Basic PR-1 protein                                                | Salicylic acid     | -46.12                |
| Mtr.8977.1.S1_at    | Pathogenesis-related protein                                      | Salicylic acid     | -37.07                |
| Mtr.8572.1.S1_at    | Thaumatococcus-like protein                                       | Salicylic acid     | -14.68                |
| Mtr.7850.1.S1_s_at  | Thaumatococcus-like protein                                       | Salicylic acid     | -10.98                |
| Mtr.9686.1.S1_at    | Beta-1,3-glucanase                                                | Salicylic acid     | -9.64                 |
| Mtr.30196.1.S1_at   | S-adenosyl-L-methionine:salicylic acid carboxyl methyltransferase | Salicylic acid     | -9.25                 |
| Mtr.9418.1.S1_s_at  | Pathogenesis-related protein                                      | Salicylic acid     | -8.69                 |
| Mtr.19902.1.S1_at   | Isochorismate synthases                                           | Salicylic acid     | -7.64                 |
| Mtr.6757.1.S1_at    | Thaumatococcus-like protein                                       | Salicylic acid     | -6.25                 |
| Mtr.31555.1.S1_at   | Beta-1,3-glucanase                                                | Salicylic acid     | -4.57                 |
| Mtr.43889.1.S1_at   | Beta-1,3-glucanase                                                | Salicylic acid     | -4.41                 |
| Mtr.19007.1.S1_at   | Barwin-related endoglucanase                                      | Salicylic acid     | -4.28                 |
| Mtr.10332.1.S1_at   | Class Ib chitinase                                                | Salicylic acid     | -3.96                 |
| Mtr.40247.1.S1_at   | Salicylic acid glucosyltransferase                                | Salicylic acid     | -3.50                 |
| Mtr.8427.1.S1_at    | Lipoxygenase                                                      | Jasmonic acid      | -469.91               |
| Mtr.52215.1.S1_at   | Lipoxygenase                                                      | Jasmonic acid      | -159.17               |
| Mtr.6142.1.S1_at    | Jasmonate O-methyltransferase                                     | Jasmonic acid      | -95.18                |
| Mtr.50430.1.S1_at   | Lipoxygenase                                                      | Jasmonic acid      | -68.30                |
| Mtr.5628.1.S1_s_at  | Lipoxygenase                                                      | Jasmonic acid      | -45.95                |
| Mtr.50426.1.S1_at   | Lipoxygenase                                                      | Jasmonic acid      | -38.23                |
| Mtr.13356.1.S1_at   | Allene oxide cyclase C4                                           | Jasmonic acid      | -21.46                |
| Mtr.40691.1.S1_at   | Lipoxygenase                                                      | Jasmonic acid      | -20.46                |
| Mtr.11326.1.S1_at   | Leaf senescence protein                                           | Jasmonic acid      | -20.38                |
| Mtr.12720.1.S1_at   | Lipoxygenase                                                      | Jasmonic acid      | -16.43                |
| Mtr.10593.1.S1_at   | Allene oxide cyclase                                              | Jasmonic acid      | -14.25                |
| Mtr.25367.1.S1_at   | 12-oxophytodienoic acid 10, 11-reductase                          | Jasmonic acid      | -8.80                 |
| Mtr.15289.1.S1_at   | Lipoxygenase                                                      | Jasmonic acid      | -7.73                 |
| Mtr.8435.1.S1_at    | Lipoxygenase                                                      | Jasmonic acid      | -4.79                 |
| Mtr.29279.1.S1_at   | Lipoxygenase                                                      | Jasmonic acid      | -4.68                 |
| Mtr.13736.1.S1_at   | Senescence-associated protein SAG102                              | Jasmonic acid      | -3.53                 |
| Mtr.17317.1.S1_at   | S-adenosyl-methionine-sterol-C-methyltransferase                  | Ethylene           | -43.67                |
| Mtr.34453.1.S1_at   | 1-aminocyclopropane-1-carboxylate synthase                        | Ethylene           | -4.44                 |
| Mtr.28159.1.S1_at   | AP2 domain transcription factor                                   | Ethylene           | -4.38                 |
| Mtr.42121.1.S1_at   | 1-aminocyclopropane-1-carboxylate synthase                        | Ethylene           | -3.54                 |
| Mtr.11023.1.S1_at   | Ethylene-responsive family protein                                | Ethylene           | -3.11                 |
| Mtr.39924.1.S1_at   | Ethylene-responsive family protein                                | Ethylene           | -3.10                 |
| Mtr.25935.1.S1_at   | Auxin-induced protein 15A                                         | Auxin              | -30.87                |
| Mtr.25935.1.S1_x_at | Auxin-induced protein 15A                                         | Auxin              | -28.10                |
| Mtr.49774.1.S1_at   | Auxin responsive SAUR                                             | Auxin              | -16.68                |
| Mtr.39011.1.S1_at   | Auxin-binding protein                                             | Auxin              | -13.64                |
| Mtr.49776.1.S1_x_at | Auxin responsive SAUR                                             | Auxin              | -5.14                 |
| Mtr.6658.1.S1_at    | Auxin-induced protein                                             | Auxin              | -4.55                 |
| Mtr.19917.1.S1_at   | Auxin responsive SAUR                                             | Auxin              | -3.44                 |
| Mtr.18240.1.S1_at   | Auxin responsive SAUR protein                                     | Auxin              | -3.28                 |
| Mtr.26216.1.S1_at   | Auxin response factor 5                                           | Auxin              | -3.19                 |
| Mtr.20619.1.S1_x_at | Auxin responsive SAUR                                             | Auxin              | -3.05                 |
| Mtr.28644.1.S1_at   | Cytokinin receptor                                                | Cytokinin          | -10.36                |

Mtr.14157.1.S1\_at

Gibberellin regulated protein

Gibberellin

-5.16

**Supplementary Table S7. Upregulated phytohormone related genes at 24 hrs post inoculation with soybean rust**

| <b>Probesets</b>    | <b>Target Description</b>                           | <b>Phytohormone</b> | <b>Fold reduction</b> |
|---------------------|-----------------------------------------------------|---------------------|-----------------------|
| Mtr.40147.1.S1_s_at | Class 10 PR protein                                 | Salicylic acid      | 212.17                |
| Mtr.42989.1.S1_at   | Thaumatococcus-like protein PR-5b                   | Salicylic acid      | 148.87                |
| Mtr.331.1.S1_at     | Chitinase                                           | Salicylic acid      | 132.80                |
| Mtr.10391.1.S1_at   | Class 10 PR protein                                 | Salicylic acid      | 98.15                 |
| Mtr.40555.1.S1_at   | Osmotin-like protein                                | Salicylic acid      | 68.96                 |
| Mtr.43852.1.S1_at   | Acidic glucanase                                    | Salicylic acid      | 65.97                 |
| Mtr.8763.1.S1_at    | Thaumatococcus-like protein PR-5a                   | Salicylic acid      | 53.55                 |
| Mtr.41478.1.S1_at   | Class 10 PR protein                                 | Salicylic acid      | 42.29                 |
| Mtr.45398.1.S1_at   | Exo-1,3-beta-glucanase                              | Salicylic acid      | 21.29                 |
| Mtr.12615.1.S1_at   | Pathogenesis-related protein PR10A                  | Salicylic acid      | 18.12                 |
| Mtr.12277.1.S1_at   | Class 10 PR protein                                 | Salicylic acid      | 17.56                 |
| Mtr.32629.1.S1_s_at | Thaumatococcus-like protein PR-5a                   | Salicylic acid      | 14.39                 |
| Mtr.8884.1.S1_at    | Pathogenesis-related protein 4A                     | Salicylic acid      | 13.09                 |
| Mtr.12466.1.S1_at   | Chitinase                                           | Salicylic acid      | 11.91                 |
| Mtr.33334.1.S1_at   | Exo-1,3-beta-glucanase                              | Salicylic acid      | 11.09                 |
| Mtr.35231.1.S1_s_at | Pathogenesis-related protein                        | Salicylic acid      | 8.62                  |
| Mtr.22903.1.S1_at   | Chitinase (Class II)                                | Salicylic acid      | 8.09                  |
| Mtr.15053.1.S1_at   | Thaumatococcus                                      | Salicylic acid      | 7.67                  |
| Mtr.10325.1.S1_at   | Chitinase                                           | Salicylic acid      | 6.63                  |
| Mtr.35960.1.S1_at   | 1, 3-beta-glucanase                                 | Salicylic acid      | 6.27                  |
| Mtr.9569.1.S1_at    | Thaumatococcus-like protein 1                       | Salicylic acid      | 5.80                  |
| Mtr.35231.1.S1_at   | Pathogenesis-related protein                        | Salicylic acid      | 5.66                  |
| Mtr.39139.1.S1_at   | Pathogenesis-related protein 4A                     | Salicylic acid      | 4.87                  |
| Mtr.7638.1.S1_at    | Endo-1,3-beta-glucanase                             | Salicylic acid      | 4.68                  |
| Mtr.12525.1.S1_at   | Chitinase                                           | Salicylic acid      | 4.60                  |
| Mtr.15054.1.S1_at   | Thaumatococcus                                      | Salicylic acid      | 4.60                  |
| Mtr.6341.1.S1_at    | Beta-1, 3-glucanase                                 | Salicylic acid      | 4.44                  |
| Mtr.10968.1.S1_at   | Osmotin-like protein                                | Salicylic acid      | 4.34                  |
| Mtr.7638.1.S1_s_at  | Endo-1,3-beta-glucanase                             | Salicylic acid      | 4.05                  |
| Mtr.41245.1.S1_at   | Chorismate mutase CM2                               | Salicylic acid      | 3.71                  |
| Mtr.9221.1.S1_at    | Salicylic acid glucosyltransferase                  | Salicylic acid      | 3.35                  |
| Mtr.35896.1.S1_at   | Chitinase                                           | Salicylic acid      | 3.26                  |
| Mtr.3520.1.S1_s_at  | Exo-beta-glucanase                                  | Salicylic acid      | 3.26                  |
| Mtr.39487.1.S1_s_at | Lipoxygenase                                        | Jasmonic acid       | 3.88                  |
| Mtr.6540.1.S1_at    | Lipoxygenase                                        | Jasmonic acid       | 3.73                  |
| Mtr.20079.1.S1_at   | Lipoxygenase                                        | Jasmonic acid       | 3.65                  |
| Mtr.12917.1.S1_at   | Jasmonic acid 2                                     | Jasmonic acid       | 3.36                  |
| Mtr.13483.1.S1_at   | 13-lipoxygenase                                     | Jasmonic acid       | 3.19                  |
| Mtr.32884.1.S1_s_at | Jasmonic acid 2                                     | Jasmonic acid       | 3.14                  |
| Mtr.23418.1.S1_s_at | AP2 domain transcription factor                     | Ethylene            | 130.97                |
| Mtr.42129.1.S1_at   | AP2 domain transcription factor                     | Ethylene            | 69.26                 |
| Mtr.44496.1.S1_at   | AP2 domain-containing protein                       | Ethylene            | 34.36                 |
| Mtr.7260.1.S1_at    | Ethylene-induced esterase                           | Ethylene            | 27.08                 |
| Mtr.5385.1.S1_at    | AP2 domain transcription factor                     | Ethylene            | 22.86                 |
| Mtr.9223.1.S1_at    | AP2 domain transcription factor                     | Ethylene            | 16.36                 |
| Mtr.7556.1.S1_at    | AP2 domain containing protein                       | Ethylene            | 9.36                  |
| Mtr.39267.1.S1_at   | 1-aminocyclopropane-1-carboxylate synthase          | Ethylene            | 9.14                  |
| Mtr.45912.1.S1_at   | Pathogenesis-related transcriptional factor and ERF | Ethylene            | 8.86                  |

|                     |                                                      |             |       |
|---------------------|------------------------------------------------------|-------------|-------|
| Mtr.4906.1.S1_s_at  | 1-aminocyclopropane-1-carboxylate oxidase            | Ethylene    | 6.87  |
| Mtr.43497.1.S1_at   | Ethylene-forming-enzyme-like dioxygenase             | Ethylene    | 6.62  |
| Mtr.10165.1.S1_at   | Ethylene receptor                                    | Ethylene    | 5.89  |
| Mtr.12456.1.S1_at   | AP2-related transcription factor                     | Ethylene    | 5.43  |
| Mtr.32914.1.S1_at   | Ethylene-induced esterase                            | Ethylene    | 4.29  |
| Mtr.5750.1.S1_at    | EREBP-3-like protein                                 | Ethylene    | 4.16  |
| Mtr.43466.1.S1_at   | Ethylene receptor                                    | Ethylene    | 3.75  |
| Mtr.10424.1.S1_at   | Ethylene responsive element binding factor           | Ethylene    | 3.54  |
| Mtr.51291.1.S1_at   | Pathogenesis-related transcriptional factor and ERF  | Ethylene    | 3.52  |
| Mtr.10425.1.S1_at   | Ethylene responsive element binding factor           | Ethylene    | 3.51  |
| Mtr.39020.1.S1_at   | Ethylene receptor homolog                            | Ethylene    | 3.23  |
| Mtr.41694.1.S1_s_at | AP2 domain transcription factor                      | Ethylene    | 3.22  |
| Mtr.35057.1.S1_at   | 1-aminocyclopropane-1-carboxylate synthase 1         | Ethylene    | 3.10  |
| Mtr.11873.1.S1_at   | Ethylene-overproduction protein                      | Ethylene    | 3.09  |
| Mtr.43104.1.S1_at   | 1-aminocyclopropanecarboxylic acid oxidase           | Ethylene    | 3.07  |
| Mtr.39368.1.S1_at   | Ethylene receptor homolog                            | Ethylene    | 3.03  |
| Mtr.13557.1.S1_at   | Ethylene receptor homolog                            | Ethylene    | 3.01  |
| Mtr.49400.1.S1_at   | Auxin responsive SAUR protein                        | Auxin       | 15.16 |
| Mtr.35852.1.S1_at   | Auxin-induced protein                                | Auxin       | 12.47 |
| Mtr.27695.1.S1_at   | Auxin response factor                                | Auxin       | 11.68 |
| Mtr.696.1.S1_at     | Auxin-induced (indole-3-acetic acid induced) protein | Auxin       | 11.06 |
| Mtr.25476.1.S1_at   | Auxin efflux carrier protein                         | Auxin       | 8.01  |
| Mtr.35357.1.S1_at   | Auxin-regulated gene                                 | Auxin       | 5.63  |
| Mtr.10147.1.S1_at   | Auxin-induced SAUR-like protein                      | Auxin       | 5.42  |
| Mtr.49791.1.S1_at   | Auxin responsive SAUR protein                        | Auxin       | 4.90  |
| Mtr.49791.1.S1_x_at | Auxin responsive SAUR protein                        | Auxin       | 4.77  |
| Mtr.13714.1.S1_at   | Auxin-induced protein 22D                            | Auxin       | 3.64  |
| Mtr.44219.1.S1_at   | Cytokinin oxidase-like protein                       | Cytokinin   | 3.95  |
| Mtr.38799.1.S1_s_at | Cytokinin oxidase                                    | Cytokinin   | 3.55  |
| Mtr.38799.1.S1_at   | Cytokinin oxidase                                    | Cytokinin   | 3.26  |
| Mtr.48768.1.S1_at   | Gibberellin regulated protein                        | Gibberellin | 38.94 |
| Mtr.15448.1.S1_at   | Gibberellin regulated protein                        | Gibberellin | 5.72  |
| Mtr.18228.1.S1_at   | Gibberellin regulated protein                        | Gibberellin | 5.59  |

**Supplementary Table S8. Downregulated phytohormone related genes at 24 hrs post inoculation with soybean rust**

| <b>Probesets</b>    | <b>Target Description</b>                                                     | <b>Phytohormone</b> | <b>Fold reduction</b> |
|---------------------|-------------------------------------------------------------------------------|---------------------|-----------------------|
| Mtr.39853.1.S1_at   | Basic PR-1 protein                                                            | Salicylic acid      | -47.85                |
| Mtr.8977.1.S1_at    | Pathogenesis-related protein 1                                                | Salicylic acid      | -27.66                |
| Mtr.7850.1.S1_s_at  | Thaumatococcus-like protein                                                   | Salicylic acid      | -15.79                |
| Mtr.9686.1.S1_at    | Beta-1,3-glucanase                                                            | Salicylic acid      | -14.00                |
| Mtr.9418.1.S1_s_at  | Pathogenesis-related protein                                                  | Salicylic acid      | -11.85                |
| Mtr.19902.1.S1_at   | Isochorismate synthases                                                       | Salicylic acid      | -11.55                |
| Mtr.30196.1.S1_at   | Salicylic acid carboxyl methyltransferase                                     | Salicylic acid      | -9.42                 |
| Mtr.43889.1.S1_at   | Beta-1,3-glucanase-like protein                                               | Salicylic acid      | -6.36                 |
| Mtr.31555.1.S1_at   | Beta-1,3-glucanase                                                            | Salicylic acid      | -5.24                 |
| Mtr.8572.1.S1_at    | Thaumatococcus-like protein                                                   | Salicylic acid      | -4.84                 |
| Mtr.19007.1.S1_at   | Barwin-related endoglucanase                                                  | Salicylic acid      | -4.32                 |
| Mtr.6757.1.S1_at    | Thaumatococcus-like protein                                                   | Salicylic acid      | -3.84                 |
| Mtr.19465.1.S1_at   | Thaumatococcus                                                                | Salicylic acid      | -3.45                 |
| Mtr.8427.1.S1_at    | Lipoxygenase                                                                  | Jasmonic acid       | -456.09               |
| Mtr.50430.1.S1_at   | Lipoxygenase                                                                  | Jasmonic acid       | -157.13               |
| Mtr.52215.1.S1_at   | Lipoxygenase                                                                  | Jasmonic acid       | -155.36               |
| Mtr.5628.1.S1_s_at  | Lipoxygenase                                                                  | Jasmonic acid       | -111.69               |
| Mtr.6142.1.S1_at    | Jasmonate O-methyltransferase                                                 | Jasmonic acid       | -86.62                |
| Mtr.50426.1.S1_at   | Lipoxygenase                                                                  | Jasmonic acid       | -72.43                |
| Mtr.40691.1.S1_at   | Lipoxygenase                                                                  | Jasmonic acid       | -30.40                |
| Mtr.12720.1.S1_at   | Lipoxygenase                                                                  | Jasmonic acid       | -26.16                |
| Mtr.10593.1.S1_at   | Allene oxide cyclase                                                          | Jasmonic acid       | -23.13                |
| Mtr.11326.1.S1_at   | Leaf senescence protein                                                       | Jasmonic acid       | -22.46                |
| Mtr.25367.1.S1_at   | 12-oxophytodienoic acid 10, 11-reductase                                      | Jasmonic acid       | -21.34                |
| Mtr.13356.1.S1_at   | Allene oxide cyclase C4                                                       | Jasmonic acid       | -20.12                |
| Mtr.15289.1.S1_at   | Lipoxygenase                                                                  | Jasmonic acid       | -8.64                 |
| Mtr.13736.1.S1_at   | Senescence-associated protein SAG102                                          | Jasmonic acid       | -5.29                 |
| Mtr.8435.1.S1_at    | Lipoxygenase                                                                  | Jasmonic acid       | -5.26                 |
| Mtr.29279.1.S1_at   | Lipoxygenase                                                                  | Jasmonic acid       | -5.20                 |
| Mtr.44182.1.S1_s_at | LEA protein                                                                   | Jasmonic acid       | -4.46                 |
| Mtr.50427.1.S1_at   | Lipoxygenase                                                                  | Jasmonic acid       | -3.54                 |
| Mtr.17317.1.S1_at   | S-adenosyl-methionine-sterol-C-methyltransferase                              | Ethylene            | -50.99                |
| Mtr.43282.1.S1_at   | S-adenosyl-L-methionine: 2,7,4'-trihydroxyisoflavanone 4'-O-methyltransferase | Ethylene            | -11.70                |
| Mtr.42121.1.S1_at   | 1-aminocyclopropane-1-carboxylate synthase                                    | Ethylene            | -4.17                 |
| Mtr.28159.1.S1_at   | AP2 domain transcription factor                                               | Ethylene            | -3.98                 |
| Mtr.11023.1.S1_at   | Ethylene-responsive family protein                                            | Ethylene            | -3.43                 |
| Mtr.39924.1.S1_at   | Ethylene-responsive family protein                                            | Ethylene            | -3.11                 |
| Mtr.25935.1.S1_at   | Auxin-induced protein 15A                                                     | Auxin               | -135.38               |
| Mtr.25935.1.S1_x_at | Auxin-induced protein 15A                                                     | Auxin               | -118.89               |
| Mtr.49764.1.S1_at   | Auxin Efflux Carrier                                                          | Auxin               | -20.20                |
| Mtr.39011.1.S1_at   | Auxin-binding protein ABP19b                                                  | Auxin               | -18.44                |
| Mtr.26217.1.S1_at   | Auxin response factor 5                                                       | Auxin               | -5.24                 |
| Mtr.49774.1.S1_at   | Auxin responsive SAUR protein                                                 | Auxin               | -4.38                 |
| Mtr.49776.1.S1_x_at | Auxin responsive SAUR protein                                                 | Auxin               | -3.80                 |
| Mtr.26216.1.S1_at   | Auxin response factor 5                                                       | Auxin               | -3.44                 |
| Mtr.6658.1.S1_at    | Auxin-induced protein                                                         | Auxin               | -3.39                 |

|                   |                                   |             |       |
|-------------------|-----------------------------------|-------------|-------|
| Mtr.28644.1.S1_at | Cytokinin receptor, partial (26%) | Cytokinin   | -7.53 |
| Mtr.14157.1.S1_at | Gibberellin regulated protein     | Gibberellin | -5.06 |

**Supplementary Table S9. The expression of genes encoding enzymes for chlorophyll catabolism**

| <b>Gene</b> | <b>Probesets</b>  | <b>Ratio (ASR12/mock)</b> | <b>Ratio (ASR24/mock)</b> |
|-------------|-------------------|---------------------------|---------------------------|
| <i>SGR</i>  | Mtr.40782.1.S1_at | 3.56                      | 6.53                      |
| <i>NYCI</i> | Mtr.43688.1.S1_at | 0.61                      | 3.14                      |
| <i>CHL</i>  | Mtr.39762.1.S1_at | 50.16                     | 15.94                     |
| <i>PAO</i>  | Mtr.50948.1.S1_at | 1.08                      | 3.23                      |
| <i>RCCR</i> | Mtr.12637.1.S1_at | 0.36                      | 0.33                      |

**Supplementary Table S10. List of primers used in this study**

| <b>Gene</b>      | <b>Probesets</b>    | <b>FW primer</b>          | <b>RV primer</b>          |
|------------------|---------------------|---------------------------|---------------------------|
| <i>Ubiquitin</i> | Mtr.40698.1.S1_at   | CTGACAGCCCCTGAATTGTGA     | TTTTGGCATTGCTGCAAGC       |
| <i>PAL</i>       | Mtr.40166.1.S1_s_at | TCCACTTTCTTGATCGCGCTTTGC  | ACTCCCTGTGACAACCTTTGAGCA  |
| <i>CHS</i>       | Mtr.40122.1.S1_s_at | CATGTGTGATAAATCTATGATCAA  | CAGACAACCAACACACGAGCACCT  |
| <i>CHR</i>       | Mtr.17404.1.S1_s_at | GGAGATGAACCTTGCATGGCAACA  | TGGTTGGTCCAGGGATCAAACGAT  |
| <i>CHI</i>       | Mtr.37413.1.S1_s_at | TCCTAGCTGCCAAATGGAAGGGT   | GCAGCCAACAGCGCTTAAGATCA   |
| <i>IFS</i>       | Mtr.11725.1.S1_at   | ACCTGCTCAACGCCACCACTATTA  | TGCTCGCCCTCTATGATTTCTCCA  |
| <i>HI4'OMT</i>   | Mtr.8652.1.S1_at    | GAAGCTTTGAAGGAGGTGTGAGAG  | AGCCATGGAAGTAGGCATAGCTGA  |
| <i>2HID</i>      | Mtr.10466.1.S1_at   | AGAACTTCCACCTCTTCTCCGTGT  | AATCCCACCAGGTGCATCAGGATA  |
| <i>I2'H</i>      | Mtr.8605.1.S1_at    | TGCAGCAGCTCCATTATTAGTGCC  | AGCCCTTCTACCCAACCCAAATGA  |
| <i>IFR</i>       | Msa.2530.1.S1_s_at  | ATGTCACTGAGGCTGATGTTGGGA  | AGCAGTGGTGTATGTGACATCAGG  |
| <i>VR</i>        | Mtr.25021.1.S1_at   | TGACTTCGCTGTGAGTGAACCAGA  | GCGTCCACGAGTTTCTTCGTGTTT  |
| <i>NYCI</i>      | Mtr.43688.1.S1_at   | AATATGGACGGTGCAGGTTCTGGA  | AACGACTCGCATCCGTGGAACATA  |
| <i>CHL</i>       | Mtr.39762.1.S1_at   | TTACACCGACAGTGGAAAGGCACAT | ACTTCACATGGTTCCTGGCATAGGT |
| <i>PAO</i>       | Mtr.50948.1.S1_at   | GGGTTGCTCTTTGTTTGGCCTGAT  | ACTGATCCGTGGGTTCCCTTCATT  |
| <i>RCCR</i>      | Mtr.12637.1.S1_at   | CAACACTTGCTTCGAAACCGGTCA  | TGATCCGAAGCAGTCCAACAATGC  |
| <i>SGR</i>       | Mtr.40782.1.S1_at   | TTGCAAAGGGATGAAGTTGTGGCG  | AGGTTGTGAAGCCTCCTTTAGTGG  |
| <i>PR3</i>       | Mtr.331.1.S1_at     | GCTGCTTTCTTGGGTCAAAC      | GTATGTGCTGCTGGGATTCT      |
| <i>PR4</i>       | Msa.3006.1.S1_at    | GGCAAGTGCTTGAGGGTGACAAAT  | ATCCAAGTTACGTGTAGCACCGCT  |
| <i>PR10</i>      | Mtr.34114.1.S1_s_at | AGAGTGTTGAAACCGTCGAGGGAA  | TAGACCCTCCATTTGGGCCTTCAA  |
| <i>Hsr203J</i>   | Mtr.40659.1.S1_at   | TTCCCATCCATCCTGGGTTTGTCA  | AATGGCGGCAGTTTCAATCCATCG  |
